# Supplementary material
Source: ML conference proceedings conference paper supplement (https://openreview.net/forum?id=m7uj1vIZ62)
Supplement: supplementary_material [file mol_0_route_optimal.pdf › materials9084/retro190_solutions/mol_0_route_optimal.pdf]

Nc1ncnc2c1c(-c1ccc3ccc(-c4ccccc4)nc3c1)cn2C1CCC1

Nc1ncnc2c1ccn2C1CCC1

BrC1ccc2ccc(-c3ccccc3)nc2c1

Nc1ncnc2[nH]ccc12

BrC1CCC1
