# Supplementary material
Source: ML conference proceedings conference paper supplement (https://openreview.net/forum?id=m7uj1vIZ62)
Supplement: supplementary_material [file mol_1_route_optimal.pdf › materials9084/retro190_solutions/mol_1_route_optimal.pdf]

COC[C@H](C)COCc1ccc([C@@]2(O)CCN(C(=O)OC(C)(C)C)[C@@H]2C=O)cc1

O=CO

COC[C@H](C)COCc1ccc(C2(O)CCN(C(=O)OC(C)(C)C)CC2)cc1

COCC(C)COC

CC(C)(C)OC(=O)N1CCC(O)(c2ccc(Br)cc2)CC1
