# Supplementary material
Source: ML conference proceedings conference paper supplement (https://openreview.net/forum?id=m7uj1vIZ62)
Supplement: supplementary_material [file mol_4_route_optimal.pdf › materials9084/retro190_solutions/mol_4_route_optimal.pdf]

O=C(OCc1ccccc1)N1CC[C@H]2CCCN(CCc3ccccc3)C[C@H]21

O=C(OCc1ccccc1)N1CC[C@H]2CCCN[C@H]21

BrCCc1ccccc1

O=C(Cl)OCc1ccccc1

C1CNC[C@H]2NCC[C@H]2C1

CCCBBr

NC[C@@H]1CCCN1
