# Supplementary material
Source: ML conference proceedings conference paper supplement (https://openreview.net/forum?id=m7uj1vIZ62)
Supplement: supplementary_material [file mol_8_route_optimal.pdf › materials9084/retro190_solutions/mol_8_route_optimal.pdf]

COC[C@H](C)COCc1ccc([C@@]2(O)CCN(C(=O)OC(C)(C)C)[C@H]2c2noc(-c3ccccc3CCNC(C)=O)c2Br)cc1

COC[C@H](C)COCc1ccc(Br)cc1

CC(=O)NCCc1ccccc1-c1onc([C@H]2CN(C(=O)OC(C)(C)C)CC[C@@H]2O)c1Br

BrCc1ccc(Br)cc1

COC[C@H](C)CO

CC(=O)NCCc1ccccc1Br

BrC1cnoc1

CC(C)(C)OC(=O)N1CCC(O)CC1
