# Supplementary material
Source: ML conference proceedings conference paper supplement (https://openreview.net/forum?id=m7uj1vIZ62)
Supplement: supplementary_material [file mol_9_route_optimal.pdf › materials9084/retro190_solutions/mol_9_route_optimal.pdf]

CC(=O)Nc1nc2c(s1)-c1c(c(C3CC3)nn1C1CCN(C(=O)N3CCN(C(C)C)CC3)CC1)CC2

CC(=O)Cl

CC(C)N1CCN(C(=O)N2CCCCC2)CC1

Nc1nc2c(s1)-c1[nH]nc(C3CC3)c1CC2

C1CCNCC1

CC(C)N1CCNCC1

O=CO

Nc1nc2c(s1)-c1[nH]ncc1CC2

[Mg+]C1CC1

CCc1csc(N)n1

BrC1ccn[nH]1
