# Supplementary material
Source: ML conference proceedings conference paper supplement (https://openreview.net/forum?id=m7uj1vIZ62)
Supplement: supplementary_material [file mol_10_route_optimal.pdf › materials9084/retro190_solutions/mol_10_route_optimal.pdf]

Cc1cc(Nc2nccc(C(F)(F)F)n2)cc(-c2cnc([C@@](C)(O)[C@H]3CC[C@H](C(=O)O)CC3)s2)c1

C[C@@](O)(c1nccs1)[C@H]1CC[C@H](C(=O)O)CC1

Cc1cc(Nc2nccc(C(F)(F)F)n2)cc(B2OC(C)(C)C(C)(C)O2)c1

CC(=O)c1nccs1

O=C(O)C1CCCCC1
