# Supplementary material
Source: ML conference proceedings conference paper supplement (https://openreview.net/forum?id=m7uj1vIZ62)
Supplement: supplementary_material [file mol_11_route_optimal.pdf › materials9084/retro190_solutions/mol_11_route_optimal.pdf]

O=S(=O)(c1cc(C(F)(F)F)ccc1Br)C1CCOC(c2ccc(Cl)cc2)C1

Clc1ccc(C2CCCCO2)cc1

O=S(=O)(Cl)c1cc(C(F)(F)F)ccc1Br

C1CCOCC1

Clc1ccc(Br)cc1
