# Supplementary material
Source: ML conference proceedings conference paper supplement (https://openreview.net/forum?id=m7uj1vIZ62)
Supplement: supplementary_material [file mol_12_route_optimal.pdf › materials9084/retro190_solutions/mol_12_route_optimal.pdf]

CCOC(=O)c1nc(N2CC[C@H](NC(=O)c3nc(C(F)(F)F)c(CC)[nH]3)[C@H](OC)C2)sc1C

CCc1[nH]c(C(=O)O)nc1C(F)(F)F

CCOC(=O)c1nc(N2CC[C@H](N)[C@H](OC)C2)sc1C

O=C(O)c1nc(C(F)(F)F)c[nH]1

CCI

CCOC(=O)c1ncsc1C

CO[C@@H]1CNCC[C@@H]1NC(=O)OC(C)(C)C
