# Supplementary material
Source: ML conference proceedings conference paper supplement (https://openreview.net/forum?id=m7uj1vIZ62)
Supplement: supplementary_material [file mol_16_route_optimal.pdf › materials9084/retro190_solutions/mol_16_route_optimal.pdf]

C[C@H](c1ccccc1)N1C[C@H]2CC=C[C@@]2(C(=O)OC(C)(C)C)C1

CC(C)(C)OC(=O)OC(=O)OC(C)(C)C

C[C@H](c1ccccc1)N1C[C@H]2CC=C[C@H]2C1

C1=C[C@H]2CNC[C@H]2C1

CC(=O)c1ccccc1

C[C@@H]1CNC[C@@H]1C

C[P+](c1ccccc1)(c1ccccc1)c1ccccc1
