# Supplementary material
Source: ML conference proceedings conference paper supplement (https://openreview.net/forum?id=m7uj1vIZ62)
Supplement: supplementary_material [file mol_18_route_optimal.pdf › materials9084/retro190_solutions/mol_18_route_optimal.pdf]

N[C@H]1CCOC[C@H]1c1ccc(I)cc1

NC1CCOCC1

Ic1ccc(I)cc1
