# Supplementary material
Source: ML conference proceedings conference paper supplement (https://openreview.net/forum?id=m7uj1vIZ62)
Supplement: supplementary_material [file mol_20_route_optimal.pdf › materials9084/retro190_solutions/mol_20_route_optimal.pdf]

CCC[C@@H](CCO)Nc1nc(N)nc(C)c1Cc1ccc(CN2CCC[C@@H]2C(=O)O)cc1OC

COc1cc(CN2CCC[C@@H]2C(=O)O)ccc1Cc1c(C)nc(N)nc1Cl

CCC[C@H](N)CCO

CN1CCC[C@@H]1C(=O)O

Cc1cc(Cl)nc(N)n1

COc1cc(O)ccc1CCl
