# Supplementary material
Source: ML conference proceedings conference paper supplement (https://openreview.net/forum?id=m7uj1vIZ62)
Supplement: supplementary_material [file mol_21_route_optimal.pdf › materials9084/retro190_solutions/mol_21_route_optimal.pdf]

C[C@]1(F)CC(F)(F)[C@@](C)(c2cc(N)ccc2F)N=C1N

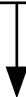

C[C@]1(F)CC(F)(F)[C@@](C)(c2cc([N+](=O)[O-])ccc2F)N=C1N

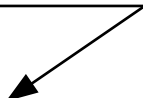

C[C@](F)(C[C](F)F)C(=[N])N

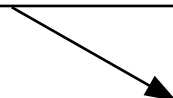

C[C]c1cc([N+](=O)[O-])ccc1F

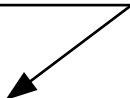

F

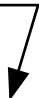

N=CN

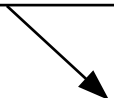

CC(=O)CC(F)F

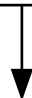

O=[N+]([O-])c1ccc(F)cc1

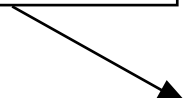

CCI
