# Supplementary material
Source: ML conference proceedings conference paper supplement (https://openreview.net/forum?id=m7uj1vIZ62)
Supplement: supplementary_material [file mol_23_route_optimal.pdf › materials9084/retro190_solutions/mol_23_route_optimal.pdf]

Cc1cc(C#N)cnc1C(=O)Nc1ccc(F)c([C@@]2(C)N=C(N)[C@@](C)(F)CC2(F)F)c1

Cc1cncc(C#N)c1

C[C@]1(F)CC(F)(F)[C@@](C)(c2cc(NC(=O)Cl)ccc2F)N=C1N

C[C@](F)(C[C](F)F)C(=[N])N

C[C]c1cc(NC(=O)Cl)ccc1F

F

N=CN

CC(=O)CC(F)F

O=C(Cl)Cl

CCc1cc(N)ccc1F
