# Supplementary material
Source: ML conference proceedings conference paper supplement (https://openreview.net/forum?id=m7uj1vIZ62)
Supplement: supplementary_material [file mol_24_route_optimal.pdf › materials9084/retro190_solutions/mol_24_route_optimal.pdf]

CC(C)(C)OC(=O)N[C@@H]1c2cccnc2C(=O)CC[C@H]1c1cccc(F)c1F

```
graph TD; A["CC(C)(C)OC(=O)N[C@@H]1c2cccnc2C(=O)CC[C@H]1c1cccc(F)c1F"] --> B["Fc1cccc(Br)c1F"]; A --> C["CC(C)(C)OC(=O)N[C@H]1CCCC(=O)c2nccc(Cl)c21"]; C --> D["CCCCNC(=O)OC(C)(C)C"]; C --> E["O=C(O)c1cc(Cl)ccn1"];
```

Fc1cccc(Br)c1F

CC(C)(C)OC(=O)N[C@H]1CCCC(=O)c2nccc(Cl)c21

CCCCNC(=O)OC(C)(C)C

O=C(O)c1cc(Cl)ccn1
