# Supplementary material
Source: ML conference proceedings conference paper supplement (https://openreview.net/forum?id=m7uj1vIZ62)
Supplement: supplementary_material [file mol_26_route_optimal.pdf › materials9084/retro190_solutions/mol_26_route_optimal.pdf]

O=C(OCc1ccccc1)N1CC[C@H]2CCCN[C@H]21



```
graph TD; A["O=C(OCc1ccccc1)N1CC[C@H]2CCCN[C@H]21"] --> B["O=C(Cl)OCc1ccccc1"]; A --> C["C1CNC[C@H]2NCC[C@H]2C1"]; C --> D["CCCBr"]; C --> E["NC[C@@H]1CCCN1"];
```

O=C(Cl)OCc1ccccc1

C1CNC[C@H]2NCC[C@H]2C1

CCCBr

NC[C@@H]1CCCN1
