# Supplementary material
Source: ML conference proceedings conference paper supplement (https://openreview.net/forum?id=m7uj1vIZ62)
Supplement: supplementary_material [file mol_29_route_optimal.pdf › materials9084/retro190_solutions/mol_29_route_optimal.pdf]

COc1ccc2nccc(C(N)CC[C@@H]3CCN(CCSc4cccs4)C[C@@H]3C(=O)O)c2c1

COc1ccc2nccc(Cl)c2c1

NCCC[C@@H]1CCN(CCSc2cccs2)C[C@@H]1C(=O)O

O=C(O)[C@@H]1CCCN(CCSc2cccs2)C1

NCCCBBr

O=C(O)[C@@H]1CCCN1

OCCSc1cccs1
