# Supplementary material
Source: ML conference proceedings conference paper supplement (https://openreview.net/forum?id=m7uj1vIZ62)
Supplement: supplementary_material [file mol_31_route_optimal.pdf › materials9084/retro190_solutions/mol_31_route_optimal.pdf]

CC(C)(C)OC(=O)N[C@@H]1c2cccn2[C@H](N2C(=O)c3ccccc3C2=O)CC[C@H]1c1cccc(F)c1F

Fc1cccc(Br)c1F

O=C1NC(=O)c2ccccc21

CC(C)(C)OC(=O)N[C@H]1CCCCc2ncccc21

O=C1CCCCc2ncccc21

CC(C)(C)OC(N)=O
