# Supplementary material
Source: ML conference proceedings conference paper supplement (https://openreview.net/forum?id=m7uj1vIZ62)
Supplement: supplementary_material [file mol_32_route_optimal.pdf › materials9084/retro190_solutions/mol_32_route_optimal.pdf]

CC(C)(C)OC(=O)N[C@@H]1c2cccnc2[C@H](O)CC[C@H]1c1cccc(F)c1F

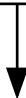

CC(C)(C)OC(=O)N[C@H](c1cccnc1)[C@@H](CCC(=O)O)c1cccc(F)c1F

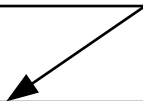

O=C(O)CCC(=O)c1cccc(F)c1F

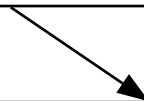

CC(C)(C)OC(=O)NCc1cccnc1
