# Supplementary material
Source: ML conference proceedings conference paper supplement (https://openreview.net/forum?id=m7uj1vIZ62)
Supplement: supplementary_material [file mol_34_route_optimal.pdf › materials9084/retro190_solutions/mol_34_route_optimal.pdf]

CN1CCN(c2ccc3c(c2)[nH]c2c(C(N)=O)cc(-c4cnn(C)c4)nc23)CC1

Cn1cc(B2OC(C)(C)C(C)(C)O2)cn1

CN1CCN(c2ccc3c(c2)[nH]c2c(C(N)=O)cc(Cl)nc23)CC1

CN1CCNCC1

Clc1ccc2[nH]c3cc(Br)ccc3c2n1

NC=O

Nc1cccc(Br)c1

Clc1cccc(Cl)n1
