# Supplementary material
Source: ML conference proceedings conference paper supplement (https://openreview.net/forum?id=m7uj1vIZ62)
Supplement: supplementary_material [file mol_35_route_optimal.pdf › materials9084/retro190_solutions/mol_35_route_optimal.pdf]

OC[C@H]1O[C@@H](SC(c2ccccc2)(c2ccccc2)c2ccccc2)[C@H](O)[C@@H](O)[C@@H]1O

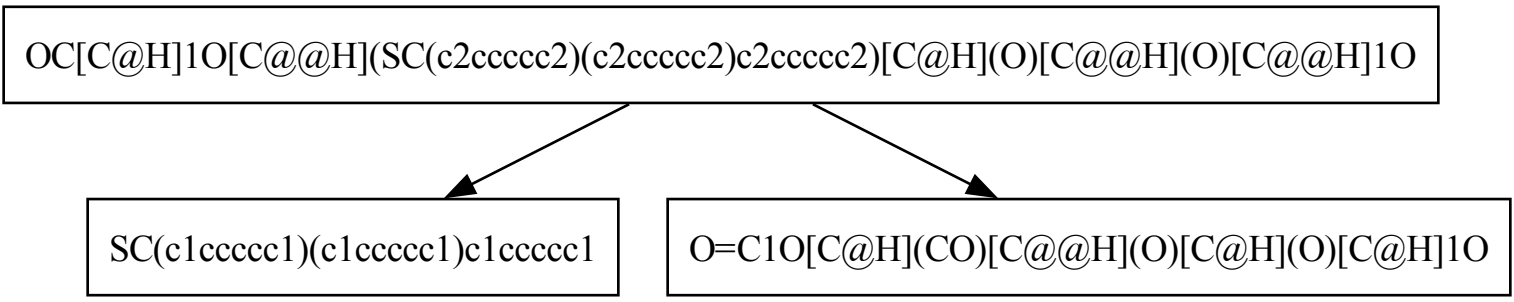

```
graph TD; A[OC[C@H]1O[C@@H](SC(c2ccccc2)(c2ccccc2)c2ccccc2)[C@H](O)[C@@H](O)[C@@H]1O] --> B[SC(c1ccccc1)(c1ccccc1)c1ccccc1]; A --> C[O=C1O[C@H](CO)[C@@H](O)[C@H](O)[C@H]1O]
```

SC(c1ccccc1)(c1ccccc1)c1ccccc1

O=C1O[C@H](CO)[C@@H](O)[C@H](O)[C@H]1O
