# Supplementary material
Source: ML conference proceedings conference paper supplement (https://openreview.net/forum?id=m7uj1vIZ62)
Supplement: supplementary_material [file mol_36_route_optimal.pdf › materials9084/retro190_solutions/mol_36_route_optimal.pdf]

O[C@H]1C[C@H](c2cnn3c(N[C@H]4CCc5ccccc54)ncnc23)C=C1COCc1ccccc1



```
graph TD; A["O[C@H]1C[C@H](c2cnn3c(N[C@H]4CCc5ccccc54)ncnc23)C=C1COCc1ccccc1"] --> B["O=C1C=C(COCc2ccccc2)[C@@H](O)C1"]; A --> C["c1ccc2c(c1)CC[C@@H]2Nc1ncnc2ccnn12"]; B --> D["O=C1CC[C@@H](O)C1"]; B --> E["COCc1ccccc1"]; C --> F["Clc1ncnc2ccnn12"]; C --> G["N[C@H]1CCc2ccccc21"];
```

O=C1C=C(COCc2ccccc2)[C@@H](O)C1

c1ccc2c(c1)CC[C@@H]2Nc1ncnc2ccnn12

O=C1CC[C@@H](O)C1

COCc1ccccc1

Clc1ncnc2ccnn12

N[C@H]1CCc2ccccc21
