# Supplementary material
Source: ML conference proceedings conference paper supplement (https://openreview.net/forum?id=m7uj1vIZ62)
Supplement: supplementary_material [file mol_37_route_optimal.pdf › materials9084/retro190_solutions/mol_37_route_optimal.pdf]

CC1=NC2(N=C1N)c1cc(Br)ccc1CCC21CC1

NC1(N)c2cc(Br)ccc2CCC12CC2

CCC(N)=O

NC1c2cc(Br)ccc2CCC12CC2

CC(C)(C)OC(N)=O

BrC1CC1

CCc1ccc(Br)cc1CN
