# Supplementary material
Source: ML conference proceedings conference paper supplement (https://openreview.net/forum?id=m7uj1vIZ62)
Supplement: supplementary_material [file mol_39_route_optimal.pdf › materials9084/retro190_solutions/mol_39_route_optimal.pdf]

C=CC[C@@H]1C(=O)N([C@H](C)c2ccccc2)C[C@@]1(C=C)C(=O)OC(C)(C)C

C=CC[C@@H]1C(=O)NC[C@@]1(C=C)C(=O)OC(C)(C)C

CC(=O)c1ccccc1

C=CC[C@@H]1C(=O)NC[C@H]1C(=O)OC(C)(C)C

C#C

C=CCCC(=O)O

CC(C)(C)OC(=O)CCN
