# Supplementary material
Source: ML conference proceedings conference paper supplement (https://openreview.net/forum?id=m7uj1vIZ62)
Supplement: supplementary_material [file mol_40_route_optimal.pdf › materials9084/retro190_solutions/mol_40_route_optimal.pdf]

COC(=O)C(C)(C)CC(CCCCO)CCCCc1cccnc1

```
graph TD; A["COC(=O)C(C)(C)CC(CCCCO)CCCCc1cccnc1"] --> B["BrCCCCc1cccnc1"]; A --> C["COC(=O)C(C)(C)CCCCCO"]; C --> D["COC(=O)C(C)C"]; C --> E["OCCCCCCBr"];
```

BrCCCCc1cccnc1

COC(=O)C(C)(C)CCCCCO

COC(=O)C(C)C

OCCCCCCBr
