# Supplementary material
Source: ML conference proceedings conference paper supplement (https://openreview.net/forum?id=m7uj1vIZ62)
Supplement: supplementary_material [file mol_42_route_optimal.pdf › materials9084/retro190_solutions/mol_42_route_optimal.pdf]

C[Si](C)(C)CCOCn1c(O[C@@H]2CO[C@H]3[C@@H]2OC[C@H]3O)nc2cc(Cl)c(-c3ccc(-c4ccc(N=S(C)(=O)N5CCCC5)cc4)cc3)nc21

CS(=O)(=Nc1ccc(-c2ccc(Br)cc2)cc1)N1CCCC1

C[Si](C)(C)CCOCn1c(O[C@@H]2CO[C@H]3[C@@H]2OC[C@H]3O)nc2cc(Cl)cnc21

C[S](=O)(Cl)N1CCCC1

Nc1ccc(-c2ccc(Br)cc2)cc1

O=C1CO[C@H]2[C@@H]1OC[C@H]2Oc1nc2cc(Cl)cnc2[nH]1

COCC[Si](C)(C)C

CS(=O)Cl

CC(C)(C)OC(=O)N1CCCC1

Oc1nc2cc(Cl)cnc2[nH]1

O=C1CO[C@@H]2C(=O)CO[C@H]12

COC

C[Si](C)(C)CCl
