# Supplementary material
Source: ML conference proceedings conference paper supplement (https://openreview.net/forum?id=m7uj1vIZ62)
Supplement: supplementary_material [file mol_43_route_optimal.pdf › materials9084/retro190_solutions/mol_43_route_optimal.pdf]

COc1ccc2nc(-c3ccc(OC)c(F)c3)nc(C(=O)NC(CO)Cc3c[nH]c4cccn34)c2c1

NC(CO)Cc1c[nH]c2ccnnc12

COc1ccc2nc(-c3ccc(OC)c(F)c3)nc(C(=O)O)c2c1

c1cnc2cc[nH]c2c1

NC(CO)CC1

COc1ccc2ncnc(C(=O)O)c2c1

COc1ccc(B(O)O)cc1F
