# Supplementary material
Source: ML conference proceedings conference paper supplement (https://openreview.net/forum?id=m7uj1vIZ62)
Supplement: supplementary_material [file mol_44_route_optimal.pdf › materials9084/retro190_solutions/mol_44_route_optimal.pdf]

CCN1CCN(CCCCCCOc2c(OC)ccc3c(Nc4c(Cl)cncc4Cl)cc(=O)[nH]c23)CC1

Clc1cncc(Cl)c1Cl

CCN1CCN(CCCCCCOc2c(OC)ccc3c(N)cc(=O)[nH]c23)CC1

COc1ccc2c(N)cc(=O)[nH]c2c1O

CCN1CCN(CCCCCCBr)CC1

Nc1cc(=O)[nH]c2c(O)cccc12

CO

O=C1CCC(=O)N1Br

CCN1CCNCCC1

BrCCCCCBr
