# Supplementary material
Source: ML conference proceedings conference paper supplement (https://openreview.net/forum?id=m7uj1vIZ62)
Supplement: supplementary_material [file mol_46_route_optimal.pdf › materials9084/retro190_solutions/mol_46_route_optimal.pdf]

C[C@@H](O)C[C@H]1OC[C@@H](C2CCCCC2)N(c2cc(C#CC(C)(C)C)sc2C(=O)O)C1=O

CC(C)(C)C#Cc1ccc(C(=O)O)s1

C[C@@H](O)CO

O=C1COC[C@@H](C2CCCCC2)N1

O=C(O)c1ccc(Br)s1

C#CC(C)(C)C

[Mg+]C1CCCCC1

O=C1COCCN1
