# Supplementary material
Source: ML conference proceedings conference paper supplement (https://openreview.net/forum?id=m7uj1vIZ62)
Supplement: supplementary_material [file mol_47_route_optimal.pdf › materials9084/retro190_solutions/mol_47_route_optimal.pdf]

C[C@H](O[Si](C)(C)C(C)(C)C)[C@@H]1CC(O)CC(C)(C)N1

CC1(C)CC(=O)CCN1

CCO[Si](C)(C)C(C)(C)C
