# Supplementary material
Source: ML conference proceedings conference paper supplement (https://openreview.net/forum?id=m7uj1vIZ62)
Supplement: supplementary_material [file mol_49_route_optimal.pdf › materials9084/retro190_solutions/mol_49_route_optimal.pdf]

CC[C@@H](OC(=O)c1ccccc1)[C@H]1CCCN(C(=O)OC(C)(C)C)C1



```
graph TD; A[CC[C@@H](OC(=O)c1ccccc1)[C@H]1CCCN(C(=O)OC(C)(C)C)C1 --> B[CCC(=O)[C@H]1CCCN(C(=O)OC(C)(C)C)C1]; A --> C[O=C(O)c1ccccc1];
```

The diagram illustrates the fragmentation of a chemical structure. A top box contains the full SMILES string. Two arrows point downwards from this box to two separate boxes below. The left box contains the SMILES string for the fragment that remains after removing the benzoate group. The right box contains the SMILES string for the removed benzoate group.

CCC(=O)[C@H]1CCCN(C(=O)OC(C)(C)C)C1

O=C(O)c1ccccc1
