# Supplementary material
Source: ML conference proceedings conference paper supplement (https://openreview.net/forum?id=m7uj1vIZ62)
Supplement: supplementary_material [file mol_50_route_optimal.pdf › materials9084/retro190_solutions/mol_50_route_optimal.pdf]

CC(C)c1ccc(OC2CCC3(CC2)N[C@@H](C(=O)O)C(C)(C)S3)cc1

CC1(C)SC2(CCC(Br)CC2)N[C@H]1C(=O)O

CC(C)c1ccc(O)cc1

O=C1CCC(Br)CC1

CC(C)(S)[C@@H](N)C(=O)O
