# Supplementary material
Source: ML conference proceedings conference paper supplement (https://openreview.net/forum?id=m7uj1vIZ62)
Supplement: supplementary_material [file mol_51_route_optimal.pdf › materials9084/retro190_solutions/mol_51_route_optimal.pdf]

C/C=C/c1c(N)nc(-c2ccc(Cl)c(OC)c2F)nc1C(=O)OC

C/C=C/c1c(N)nc(Cl)nc1C(=O)OC

COc1c(Cl)ccc(Br)c1F

C=CC

COC(=O)c1cc(N)nc(Cl)n1
