# Supplementary material
Source: ML conference proceedings conference paper supplement (https://openreview.net/forum?id=m7uj1vIZ62)
Supplement: supplementary_material [file mol_52_route_optimal.pdf › materials9084/retro190_solutions/mol_52_route_optimal.pdf]

N#Cc1cc(F)cc([C@H]2C[C@H](F)CN2c2ccn3ncc(C(N)=O)c3c2)c1



```
graph TD; A["N#Cc1cc(F)cc([C@H]2C[C@H](F)CN2c2ccn3ncc(C(N)=O)c3c2)c1"] --> B["NC(=O)c1cnn2ccc(Br)cc12"]; A --> C["N#Cc1cc(F)cc([C@H]2C[C@H](F)CN2)c1"]; B --> D["O=C1CCC(=O)N1Br"]; B --> E["NC(=O)c1cnn2ccccc12"]; C --> F["F[C@H]1CCNC1"]; C --> G["N#Cc1cc(F)cc(Br)c1"];
```

NC(=O)c1cnn2ccc(Br)cc12

N#Cc1cc(F)cc([C@H]2C[C@H](F)CN2)c1

O=C1CCC(=O)N1Br

NC(=O)c1cnn2ccccc12

F[C@H]1CCNC1

N#Cc1cc(F)cc(Br)c1
