# Supplementary material
Source: ML conference proceedings conference paper supplement (https://openreview.net/forum?id=m7uj1vIZ62)
Supplement: supplementary_material [file mol_53_route_optimal.pdf › materials9084/retro190_solutions/mol_53_route_optimal.pdf]

CCc1nc(C)c(C(=O)Nc2ccc(-c3ccc(C45CCC(CC(=O)OC)(CC4)OC5)cc3)cc2)o1

COC(=O)CC12CCC(CC1)CO2

CCc1nc(C)c(C(=O)Nc2ccc(-c3ccc(Br)cc3)cc2)o1

COC(=O)CBr

OCC1CCCCC1

CCc1nc(C)c(C(=O)O)o1

Nc1ccc(-c2ccc(Br)cc2)cc1
