# Supplementary material
Source: ML conference proceedings conference paper supplement (https://openreview.net/forum?id=m7uj1vIZ62)
Supplement: supplementary_material [file mol_54_route_optimal.pdf › materials9084/retro190_solutions/mol_54_route_optimal.pdf]

OC[C@H]1C[C@@H](c2cnn3c(N[C@H]4CCc5ccccc54)ncnc23)C[C@@H]1O

c1ccc2c(c1)CC[C@@H]2Nc1ncnc2ccnn12

O=C1C[C@H](CO)[C@@H](O)C1

Clc1ncnc2ccnn12

N[C@H]1CCc2ccccc21

O=C1CC[C@@H](O)C1

C=O
