# Supplementary material
Source: ML conference proceedings conference paper supplement (https://openreview.net/forum?id=m7uj1vIZ62)
Supplement: supplementary_material [file mol_58_route_optimal.pdf › materials9084/retro190_solutions/mol_58_route_optimal.pdf]

CC(C)(C)OC(=O)NC1(C2CCc3cc(Sc4cccc(OCc5ccccc5)c4)ccc3C2)COC(C)(C)OC1

```
graph TD; A["CC(C)(C)OC(=O)NC1(C2CCc3cc(Sc4cccc(OCc5ccccc5)c4)ccc3C2)COC(C)(C)OC1"] --> B["Sc1cccc(OCc2ccccc2)c1"]; A --> C["CC(C)(C)OC(=O)NC1(C2CCc3cc(Br)ccc3C2)COC(C)(C)OC1"]; C --> D["CC1(C)OCC(=O)CO1"]; C --> E["CC(C)(C)OC(N)=O"]; C --> F["BrC1ccc2c(c1)CCCC2"];
```

Sc1cccc(OCc2ccccc2)c1

CC(C)(C)OC(=O)NC1(C2CCc3cc(Br)ccc3C2)COC(C)(C)OC1

CC1(C)OCC(=O)CO1

CC(C)(C)OC(N)=O

BrC1ccc2c(c1)CCCC2
