# Supplementary material
Source: ML conference proceedings conference paper supplement (https://openreview.net/forum?id=m7uj1vIZ62)
Supplement: supplementary_material [file mol_59_route_optimal.pdf › materials9084/retro190_solutions/mol_59_route_optimal.pdf]

C[C@@]1(O)[C@H](O)[C@@H](CO)O[C@H]1n1ccc2c(N)nc(N)nc21



The diagram illustrates the fragmentation of a chemical structure. A top box contains the full SMILES string. Two arrows originate from the bottom of this box, pointing to two separate boxes below. The left arrow points to a box containing a fragment of the molecule, and the right arrow points to a box containing the complementary fragment.

C[C@]1(O)C(=O)O[C@H](CO)[C@H]1O

Nc1nc(N)c2cc[nH]c2n1
