# Supplementary material
Source: ML conference proceedings conference paper supplement (https://openreview.net/forum?id=m7uj1vIZ62)
Supplement: supplementary_material [file mol_61_route_optimal.pdf › materials9084/retro190_solutions/mol_61_route_optimal.pdf]

O=S(=O)(C#Cc1ccc(Cl)cc1)N1CCNCC1

C1CNCCN1

O=S(=O)(Cl)C#Cc1ccc(Cl)cc1

O=Cc1ccc(Cl)cc1

CS(=O)(=O)Cl
