# Supplementary material
Source: ML conference proceedings conference paper supplement (https://openreview.net/forum?id=m7uj1vIZ62)
Supplement: supplementary_material [file mol_62_route_optimal.pdf › materials9084/retro190_solutions/mol_62_route_optimal.pdf]

COC[C@H](C)COCc1ccc([C@@]2(O)CCNC[C@@H]2c2noc(-c3ccccc3CCNC(C)=O)c2Br)cc1

CC(=O)NCCc1ccccc1-c1onc([C@H]2CNCC[C@]2(O)c2ccc(CBr)cc2)c1Br

COC[C@H](C)CO

BrCc1ccc(Br)cc1

CC(=O)NCCc1ccccc1-c1onc([C@H]2CNCCC2=O)c1Br

CC(=O)NCCc1ccccc1Br

Br1cnoc1

O=C1CCNCC1
