# Supplementary material
Source: ML conference proceedings conference paper supplement (https://openreview.net/forum?id=m7uj1vIZ62)
Supplement: supplementary_material [file mol_63_route_optimal.pdf › materials9084/retro190_solutions/mol_63_route_optimal.pdf]

CC(C)(C)OC(=O)N[C@@H]1c2cccn2[C@@H](O)CC[C@H]1c1cccc(F)c1F

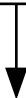

CC(C)(C)OC(=O)NCc1cccn1C(=O)CCc1cccc(F)c1F

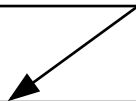

O=C(O)CCc1cccc(F)c1F

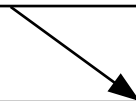

CC(C)(C)OC(=O)NCc1cccn1
