# Supplementary material
Source: ML conference proceedings conference paper supplement (https://openreview.net/forum?id=m7uj1vIZ62)
Supplement: supplementary_material [file mol_64_route_optimal.pdf › materials9084/retro190_solutions/mol_64_route_optimal.pdf]

CC(C)N1CCC(Oc2ccc3c(c2)cc2n3[C@H](C)CN(CCO)C2=O)CC1

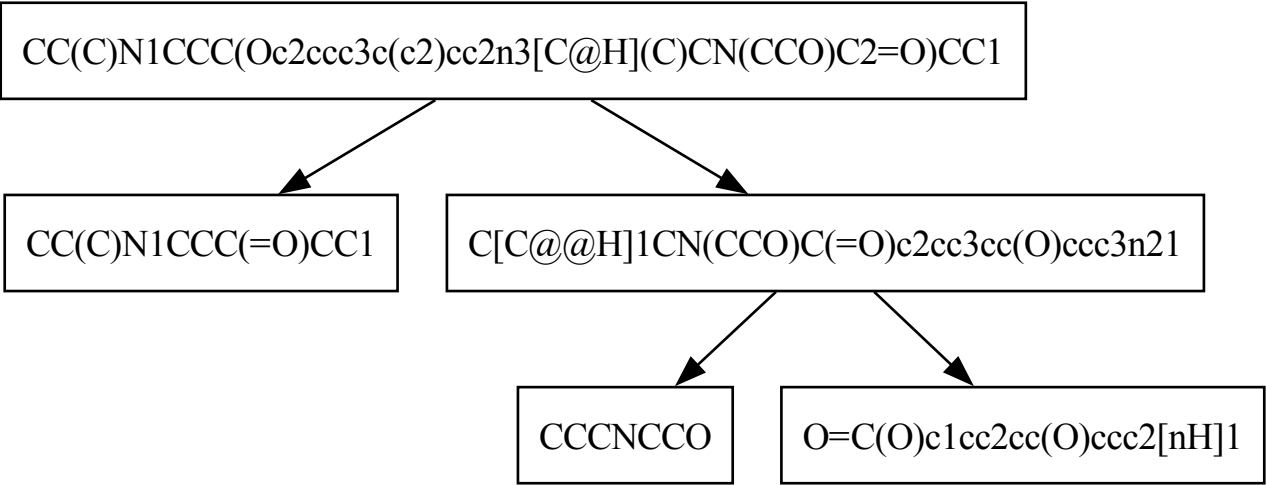

```
graph TD; A[CC(C)N1CCC(Oc2ccc3c(c2)cc2n3[C@H](C)CN(CCO)C2=O)CC1] --> B[CC(C)N1CCC(=O)CC1]; A --> C[C[C@@H]1CN(CCO)C(=O)c2cc3cc(O)ccc3n21]; C --> D[CCCNCCO]; C --> E[O=C(O)c1cc2cc(O)ccc2[nH]1]
```

CC(C)N1CCC(=O)CC1

C[C@@H]1CN(CCO)C(=O)c2cc3cc(O)ccc3n21

CCCNCCO

O=C(O)c1cc2cc(O)ccc2[nH]1
