# Supplementary material
Source: ML conference proceedings conference paper supplement (https://openreview.net/forum?id=m7uj1vIZ62)
Supplement: supplementary_material [file mol_66_route_optimal.pdf › materials9084/retro190_solutions/mol_66_route_optimal.pdf]

COc1cc2c(=O)[nH]c(=O)n([C@@H]3O[C@H](CO)[C@H]4OC(C)(C)O[C@H]43)c2cc1OC

COc1cc2[nH]c(=O)[nH]c(=O)c2cc1OC

CC1(C)O[C@@H]2[C@@H](CO)OC(=O)[C@@H]2O1

CC(C)=O

O=C1O[C@H](CO)[C@@H](O)[C@H]1O
