# Supplementary material
Source: ML conference proceedings conference paper supplement (https://openreview.net/forum?id=m7uj1vIZ62)
Supplement: supplementary_material [file mol_67_route_optimal.pdf › materials9084/retro190_solutions/mol_67_route_optimal.pdf]

COC[C@H](C)COCc1ccc([C@@]2(O)CCN(C(=O)OC(C)(C)C)C[C@@H]2CO)cc1

```
graph TD; A[COC[C@H](C)COCc1ccc([C@@]2(O)CCN(C(=O)OC(C)(C)C)C[C@@H]2CO)cc1] --> B[CC(C)(C)OC(=O)N1CC[C@](O)(c2ccc(CBr)cc2)[C@@H](CO)C1]; A --> C[COC[C@H](C)CO]; B --> D[BrCc1ccc(Br)cc1]; B --> E[CC(C)(C)OC(=O)N1CC[C@H](O)[C@@H](CO)C1];
```

CC(C)(C)OC(=O)N1CC[C@](O)(c2ccc(CBr)cc2)[C@@H](CO)C1

COC[C@H](C)CO

BrCc1ccc(Br)cc1

CC(C)(C)OC(=O)N1CC[C@H](O)[C@@H](CO)C1
