# Supplementary material
Source: ML conference proceedings conference paper supplement (https://openreview.net/forum?id=m7uj1vIZ62)
Supplement: supplementary_material [file mol_68_route_optimal.pdf › materials9084/retro190_solutions/mol_68_route_optimal.pdf]

COCCCC1CC(O)CC(CN(C(=O)[C@H]2CN(C(=O)OC(C)(C)C)CC[C@@H]2C2CCC(OCCOc3c(Cl)cc(C)cc3Cl)CC2)C2CC2)C1

Cc1cc(Cl)c(OCCOc2ccc([C@H]3CCN(C(=O)OC(C)(C)C)C[C@@H]3C(=O)O)CC2)c(Cl)c1

COCCCC1CC(O)CC(CNC2CC2)C1

CC(C)(C)OC(=O)N1CCC[C@@H](C(=O)O)C1

Cc1cc(Cl)c(OCCOc2ccc(Br)CC2)c(Cl)c1

Oc1cccc(CNC2CC2)C1

COCCCBBr

Cc1cc(Cl)c(O)c(Cl)c1

BrCCOc1ccc(Br)CC1
