# Supplementary material
Source: ML conference proceedings conference paper supplement (https://openreview.net/forum?id=m7uj1vIZ62)
Supplement: supplementary_material [file mol_69_route_optimal.pdf › materials9084/retro190_solutions/mol_69_route_optimal.pdf]

CC(C)(C)OC(=O)NC1(c2nc(NCc3cccn3)c3c(Cl)ccn3n2)CC1

```
graph TD; A["CC(C)(C)OC(=O)NC1(c2nc(NCc3cccn3)c3c(Cl)ccn3n2)CC1"] --> B["NCc1cccn1"]; A --> C["CC(C)(C)OC(=O)NC1(c2nc(Cl)c3c(Cl)ccn3n2)CC1"]; C --> D["Clc1nc(Cl)c2c(Cl)ccn2n1"]; C --> E["CC(C)(C)OC(=O)NC1CC1"];
```

NCc1cccn1

CC(C)(C)OC(=O)NC1(c2nc(Cl)c3c(Cl)ccn3n2)CC1

Clc1nc(Cl)c2c(Cl)ccn2n1

CC(C)(C)OC(=O)NC1CC1
