# Supplementary material
Source: ML conference proceedings conference paper supplement (https://openreview.net/forum?id=m7uj1vIZ62)
Supplement: supplementary_material [file mol_70_route_optimal.pdf › materials9084/retro190_solutions/mol_70_route_optimal.pdf]

CC1(C)OCC(C)(CO)N(Cc2ccccc2)C1=O

BrCc1ccccc1

CC1(CO)COC(C)(C)C(=O)N1

CC(C)C(=O)Cl

CC(N)(CO)CO
