# Supplementary material
Source: ML conference proceedings conference paper supplement (https://openreview.net/forum?id=m7uj1vIZ62)
Supplement: supplementary_material [file mol_71_route_optimal.pdf › materials9084/retro190_solutions/mol_71_route_optimal.pdf]

Nc1ccc(OC2(S(=O)(=O)c3ccccc3)CC2)nc1Cl

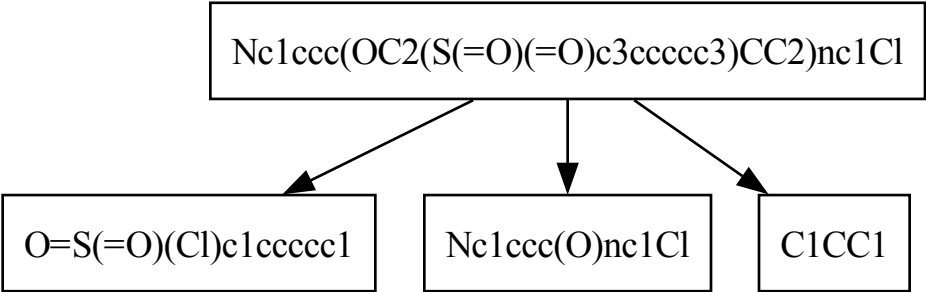

```
graph TD; A["Nc1ccc(OC2(S(=O)(=O)c3ccccc3)CC2)nc1Cl"] --> B["O=S(=O)(Cl)c1ccccc1"]; A --> C["Nc1ccc(O)nc1Cl"]; A --> D["C1CC1"];
```

O=S(=O)(Cl)c1ccccc1

Nc1ccc(O)nc1Cl

C1CC1
