# Supplementary material
Source: ML conference proceedings conference paper supplement (https://openreview.net/forum?id=m7uj1vIZ62)
Supplement: supplementary_material [file mol_72_route_optimal.pdf › materials9084/retro190_solutions/mol_72_route_optimal.pdf]

CCc1[nH]c(C(=O)N[C@H]2CCN(c3cccc(C(=O)OC(C)(C)C)c3)C[C@H]2OC)nc1C(F)(F)F

CC(C)(C)OC(=O)c1ccccc1

CCc1[nH]c(C(=O)O)nc1C(F)(F)F

CO[C@@H]1CNCC[C@@H]1N

O=C(O)c1nc(C(F)(F)F)c[nH]1

CCI

N[C@H]1CCNC[C@H]1O

CO
