# Supplementary material
Source: ML conference proceedings conference paper supplement (https://openreview.net/forum?id=m7uj1vIZ62)
Supplement: supplementary_material [file mol_73_route_optimal.pdf › materials9084/retro190_solutions/mol_73_route_optimal.pdf]

CCCCOC(=O)N1CCN(C(=O)[C@H](CCCO[Si](c2ccccc2)(c2ccccc2)C(C)(C)C)NC(=O)OC(C)(C)C)CC1

CC(C)(C)OC(=O)N[C@@H](CCCO[Si](c1ccccc1)(c1ccccc1)C(C)(C)C)C(=O)O

CCCCOC(=O)N1CCNCC1

CC(C)(C)[Si](Cl)(c1ccccc1)c1ccccc1

CC(C)(C)OC(=O)N[C@@H](CCCO)C(=O)O
