# Supplementary material
Source: ML conference proceedings conference paper supplement (https://openreview.net/forum?id=m7uj1vIZ62)
Supplement: supplementary_material [file mol_75_route_optimal.pdf › materials9084/retro190_solutions/mol_75_route_optimal.pdf]

COC(=O)c1ccc(-c2ccc(O[C@H]3O[C@H](CO)[C@@H](O)[C@H](O)[C@@H]3O)c(Cl)c2)cc1

OC[C@H]1O[C@H](Oc2ccc(Br)cc2Cl)[C@@H](O)[C@@H](O)[C@@H]1O

COC(=O)c1ccc(B2OC(C)(C)C(C)(C)O2)cc1

Oc1ccc(Br)cc1Cl

O=C1CO[C@H](CO)[C@@H](O)[C@@H]1O
