# Supplementary material
Source: ML conference proceedings conference paper supplement (https://openreview.net/forum?id=m7uj1vIZ62)
Supplement: supplementary_material [file mol_76_route_optimal.pdf › materials9084/retro190_solutions/mol_76_route_optimal.pdf]

CC(C)(C)OC(=O)[C@@]12C=CC[C@@H]1CN(C(=O)OCc1ccccc1)C2

CC(C)(C)OC(=O)[C@@]12C=CC[C@@H]1CNC2

O=C(Cl)OCc1ccccc1

C1=C[C@@H]2CNC[C@H]2C1

CC(C)(C)OC(=O)OC(=O)OC(C)(C)C

C[C@@H]1CNC[C@H]1CC=O

O=CCBr

C[C@H]1CCNC1
