# Supplementary material
Source: ML conference proceedings conference paper supplement (https://openreview.net/forum?id=m7uj1vIZ62)
Supplement: supplementary_material [file mol_77_route_optimal.pdf › materials9084/retro190_solutions/mol_77_route_optimal.pdf]

COC(=O)CCc1cc2cc(-c3noc(-c4ccc(OC(C)C)c(Cl)c4)n3)ccc2n1C

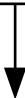

COC(=O)CCc1cc2cc(C(N)=NOC(=O)c3ccc(OC(C)C)c(Cl)c3)ccc2n1C

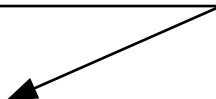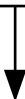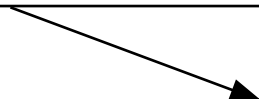

COC(=O)CCBr

CC(C)Oc1ccc(C(=O)O)cc1Cl

Cn1ccc2cc(C(=N)N)ccc21
