# Supplementary material
Source: ML conference proceedings conference paper supplement (https://openreview.net/forum?id=m7uj1vIZ62)
Supplement: supplementary_material [file mol_80_route_optimal.pdf › materials9084/retro190_solutions/mol_80_route_optimal.pdf]

CC#CCn1c(Br)nc(C=O)c1C(=O)OC

```
graph TD; A[CC#CCn1c(Br)nc(C=O)c1C(=O)OC] --> B[CC#CCBr]; A --> C[COC(=O)c1[nH]c(Br)nc1C=O]; C --> D[CN(C)C=O]; C --> E[COC(=O)c1cnc(Br)[nH]1]
```

CC#CCBr

COC(=O)c1[nH]c(Br)nc1C=O

CN(C)C=O

COC(=O)c1cnc(Br)[nH]1
