# Supplementary material
Source: ML conference proceedings conference paper supplement (https://openreview.net/forum?id=m7uj1vIZ62)
Supplement: supplementary_material [file mol_81_route_optimal.pdf › materials9084/retro190_solutions/mol_81_route_optimal.pdf]

C[Si](C)(C)CCOCn1cc(C2CCc3c(C(=O)O)nn(COCC[Si](C)(C)C)c3C2)cn1

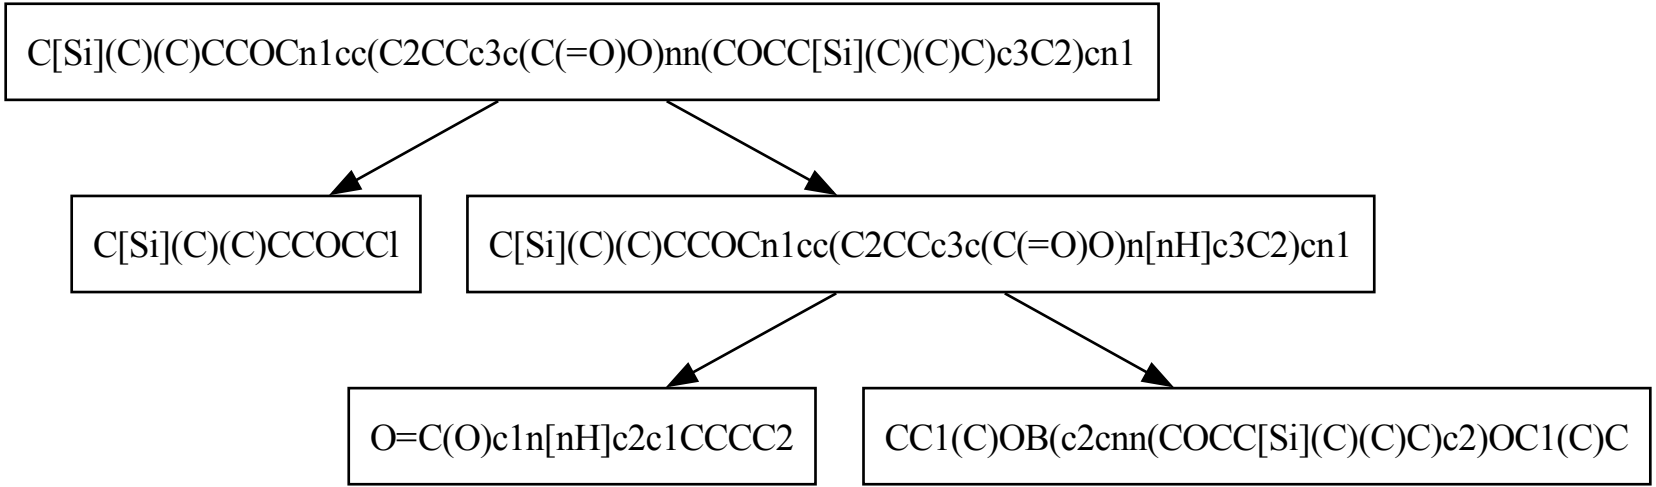

```
graph TD; A["C[Si](C)(C)CCOCn1cc(C2CCc3c(C(=O)O)nn(COCC[Si](C)(C)C)c3C2)cn1"] --> B["C[Si](C)(C)CCOCCl"]; A --> C["C[Si](C)(C)CCOCn1cc(C2CCc3c(C(=O)O)n[nH]c3C2)cn1"]; C --> D["O=C(O)c1n[nH]c2c1CCCC2"]; C --> E["CC1(C)OB(c2cnn(COCC[Si](C)(C)C)c2)OC1(C)C"];
```

C[Si](C)(C)CCOCCl

C[Si](C)(C)CCOCn1cc(C2CCc3c(C(=O)O)n[nH]c3C2)cn1

O=C(O)c1n[nH]c2c1CCCC2

CC1(C)OB(c2cnn(COCC[Si](C)(C)C)c2)OC1(C)C
