# Supplementary material
Source: ML conference proceedings conference paper supplement (https://openreview.net/forum?id=m7uj1vIZ62)
Supplement: supplementary_material [file mol_83_route_optimal.pdf › materials9084/retro190_solutions/mol_83_route_optimal.pdf]

CCc1ccc(S(=O)(=O)NC2c3cc(CC(=O)NC4CCCc5ccccc54)ccc3OC(C)(C)C2O)cc1

```
graph TD; A[CCc1ccc(S(=O)(=O)NC2c3cc(CC(=O)NC4CCCc5ccccc54)ccc3OC(C)(C)C2O)cc1] --> B[CCc1ccc(S(=O)(=O)NC2c3cc(CC(=O)O)ccc3OC(C)(C)C2O)cc1]; A --> C[NC1CCCc2ccccc21]; B --> D[CCc1ccc(S(=O)(=O)NCC(O)C(C)C)cc1]; B --> E[O=C(O)Cc1ccc(O)c(Br)c1];
```

CCc1ccc(S(=O)(=O)NC2c3cc(CC(=O)O)ccc3OC(C)(C)C2O)cc1

NC1CCCc2ccccc21

CCc1ccc(S(=O)(=O)NCC(O)C(C)C)cc1

O=C(O)Cc1ccc(O)c(Br)c1
