# Supplementary material
Source: ML conference proceedings conference paper supplement (https://openreview.net/forum?id=m7uj1vIZ62)
Supplement: supplementary_material [file mol_84_route_optimal.pdf › materials9084/retro190_solutions/mol_84_route_optimal.pdf]

C=C(C[C@@H](Cc1ccc(-c2ccccc2)cc1)NC(=O)OC(C)(C)C)C(=O)O

The diagram illustrates the fragmentation of a chemical structure. A top box contains the full SMILES string. Two arrows point from this box to two bottom boxes, representing the fragments. The left arrow points to a box containing a SMILES string for a fragment with a chiral center, and the right arrow points to a box containing a SMILES string for a fragment with a double bond.

CC(C)(C)OC(=O)N[C@@H](CO)Cc1ccc(-c2ccccc2)cc1

C=CC(=O)O
