# Supplementary material
Source: ML conference proceedings conference paper supplement (https://openreview.net/forum?id=m7uj1vIZ62)
Supplement: supplementary_material [file mol_86_route_optimal.pdf › materials9084/retro190_solutions/mol_86_route_optimal.pdf]

COc1cc(-c2cccc(C(F)(F)F)c2)c(F)cc1-c1nncc2cc(S(=O)(=O)Nc3ccon3)ccc12

O=S(=O)(Nc1ccon1)c1ccc2c(Br)nncc2c1

COc1cc(-c2cccc(C(F)(F)F)c2)c(F)cc1B(O)O

O=S(=O)(O)c1ccc2c(Br)nncc2c1

Nc1ccon1

BrC1nncc2ccccc12

O=S(=O)=O
