# Supplementary material
Source: ML conference proceedings conference paper supplement (https://openreview.net/forum?id=m7uj1vIZ62)
Supplement: supplementary_material [file mol_87_route_optimal.pdf › materials9084/retro190_solutions/mol_87_route_optimal.pdf]

CCCC[C@@H](C(=O)N1CCC[C@H]1C(=O)O)[C@@H](F)C(=O)OC

```
graph TD; A["CCCC[C@@H](C(=O)N1CCC[C@H]1C(=O)O)[C@@H](F)C(=O)OC"] --> B["CCCC[C@@H](C(=O)O)[C@@H](F)C(=O)OC"]; A --> C["O=C(O)[C@@H]1CCCN1"]; B --> D["CCCCC(=O)C(=O)O"]; B --> E["COC(=O)CF"];
```

CCCC[C@@H](C(=O)O)[C@@H](F)C(=O)OC

O=C(O)[C@@H]1CCCN1

CCCCC(=O)C(=O)O

COC(=O)CF
