# Supplementary material
Source: ML conference proceedings conference paper supplement (https://openreview.net/forum?id=m7uj1vIZ62)
Supplement: supplementary_material [file mol_90_route_optimal.pdf › materials9084/retro190_solutions/mol_90_route_optimal.pdf]

CC1(C)OCC(C)(CO[Si](C)(C)C(C)(C)C)N(Cc2ccccc2)C1=O

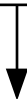

C=C(COC(C)(C)C(=O)NCc1ccccc1)CO[Si](C)(C)C(C)(C)C

C=C(CBr)CO[Si](C)(C)C(C)(C)C

CC(C)(O)C(=O)NCc1ccccc1
