# Supplementary material
Source: ML conference proceedings conference paper supplement (https://openreview.net/forum?id=m7uj1vIZ62)
Supplement: supplementary_material [file mol_91_route_optimal.pdf › materials9084/retro190_solutions/mol_91_route_optimal.pdf]

Cn1nccc1[C@]1(O)CCCC[C@H]1O

Cn1nccc1B1OC(C)(C)C(C)(C)O1

O[C@@H]1CCCC[C@H]1O
