# Supplementary material
Source: ML conference proceedings conference paper supplement (https://openreview.net/forum?id=m7uj1vIZ62)
Supplement: supplementary_material [file mol_93_route_optimal.pdf › materials9084/retro190_solutions/mol_93_route_optimal.pdf]

Cc1ccc(C(C)(C)C)cc1S[C@@H]1O[C@H](CO)[C@@H](O)[C@H](O)[C@H]1O



```
graph TD; A["Cc1ccc(C(C)(C)C)cc1S[C@@H]1O[C@H](CO)[C@@H](O)[C@H](O)[C@H]1O"] --> B["O=C1O[C@H](CO)[C@@H](O)[C@H](O)[C@H]1O"]; A --> C["Cc1ccc(C(C)(C)C)cc1S"];
```

O=C1O[C@H](CO)[C@@H](O)[C@H](O)[C@H]1O

Cc1ccc(C(C)(C)C)cc1S
