# Supplementary material
Source: ML conference proceedings conference paper supplement (https://openreview.net/forum?id=m7uj1vIZ62)
Supplement: supplementary_material [file mol_94_route_optimal.pdf › materials9084/retro190_solutions/mol_94_route_optimal.pdf]

Oc1ccc2c(c1)[C@H](c1ccc(OCCN3CCCC3)cc1)[C@H](c1ccccc1)CO2

BrC1CCC(OCCN2CCCC2)CC1

Oc1ccc2c(c1)C[C@H](c1ccccc1)CO2

OB(O)c1ccccc1

Oc1ccc2c(c1)CCCO2
