# Supplementary material
Source: ML conference proceedings conference paper supplement (https://openreview.net/forum?id=m7uj1vIZ62)
Supplement: supplementary_material [file mol_95_route_optimal.pdf › materials9084/retro190_solutions/mol_95_route_optimal.pdf]

CC(C)(CO)n1c(CO)nc2cnc(Br)cc21

CC(C)(Br)CO

OCc1nc2cnc(Br)cc2[nH]1

O=C1CCC(=O)N1Br

OCc1nc2cnccc2[nH]1
