# Supplementary material
Source: ML conference proceedings conference paper supplement (https://openreview.net/forum?id=m7uj1vIZ62)
Supplement: supplementary_material [file mol_103_route_optimal.pdf › materials9084/retro190_solutions/mol_103_route_optimal.pdf]

CCOP(=O)(Cc1ccc(Nc2ncc(C(F)(F)F)c(Nc3ccc([C@H]4CC[C@H](N5CCN(C)CC5)CC4)c4c3C(=O)N(C)C4)n2)c(OC)c1)OCC

CN1CCN([C@H]2CC[C@H](c3ccc(N)c4c3CN(C)C4=O)CC2)CC1

CCOP(=O)(Cc1ccc(Nc2ncc(C(F)(F)F)c(Cl)n2)c(OC)c1)OCC

CN1CCN(C2CCC(=O)CC2)CC1

CN1Cc2cccc(N)c2C1=O

FC(F)(F)c1cnc(Cl)nc1Cl

CCOP(=O)(Cc1ccc(N)c(OC)c1)OCC

COc1cc(C)ccc1N

CCOP(O)OCC
