# Supplementary material
Source: ML conference proceedings conference paper supplement (https://openreview.net/forum?id=m7uj1vIZ62)
Supplement: supplementary_material [file mol_104_route_optimal.pdf › materials9084/retro190_solutions/mol_104_route_optimal.pdf]

CCCCCCC(C)(C)c1ccc([C@H]2C[C@@H](O)CCN2C=O)c(OCc2ccccc2)c1

O=CO

CCCCCCC(C)(C)c1ccc([C@H]2C[C@@H](O)CCN2)c(OCc2ccccc2)c1

OC1CCNCC1

CCCCCCC(C)(C)c1ccc(Br)c(OCc2ccccc2)c1
