# Supplementary material
Source: ML conference proceedings conference paper supplement (https://openreview.net/forum?id=m7uj1vIZ62)
Supplement: supplementary_material [file mol_108_route_optimal.pdf › materials9084/retro190_solutions/mol_108_route_optimal.pdf]

COC(=O)CC12CCC(c3ccc(Br)cc3)(CC1)CO2

COC(=O)CC12CCC(CC1)CO2

BrC1ccc(I)cc1

COC(=O)CBr

OCC1CCCCC1
