# Supplementary material
Source: ML conference proceedings conference paper supplement (https://openreview.net/forum?id=m7uj1vIZ62)
Supplement: supplementary_material [file mol_110_route_optimal.pdf › materials9084/retro190_solutions/mol_110_route_optimal.pdf]

C[C@@H]1CCCN1CCc1nnc2cc(Br)ccc2c1O

OCCc1nnc2cc(Br)ccc2c1O

C[C@@H]1CCCN1

OCCBr

Oc1cnnc2cc(Br)ccc12
