# Supplementary material
Source: ML conference proceedings conference paper supplement (https://openreview.net/forum?id=m7uj1vIZ62)
Supplement: supplementary_material [file mol_111_route_optimal.pdf › materials9084/retro190_solutions/mol_111_route_optimal.pdf]

CN(C)CC(OCC1(c2ccc(F)cc2)CCN(C(=O)OC(C)(C)C)CC1)c1cc(Cl)cc2cn(COCC[Si](C)(C)C)nc12

```
graph TD; A["CN(C)CC(OCC1(c2ccc(F)cc2)CCN(C(=O)OC(C)(C)C)CC1)c1cc(Cl)cc2cn(COCC[Si](C)(C)C)nc12"] --> B["C[Si](C)(C)CCOCCl"]; A --> C["CN(C)CC(OCC1(c2ccc(F)cc2)CCN(C(=O)OC(C)(C)C)CC1)c1cc(Cl)cc2c[nH]nc12"]; C --> D["CC(C)(C)OC(=O)N1CCC(CO)(c2ccc(F)cc2)CC1"]; C --> E["CCN(C)C"]; C --> F["Clc1cc(Br)c2n[nH]cc2c1"];
```

C[Si](C)(C)CCOCCl

CN(C)CC(OCC1(c2ccc(F)cc2)CCN(C(=O)OC(C)(C)C)CC1)c1cc(Cl)cc2c[nH]nc12

CC(C)(C)OC(=O)N1CCC(CO)(c2ccc(F)cc2)CC1

CCN(C)C

Clc1cc(Br)c2n[nH]cc2c1
