# Supplementary material
Source: ML conference proceedings conference paper supplement (https://openreview.net/forum?id=m7uj1vIZ62)
Supplement: supplementary_material [file mol_113_route_optimal.pdf › materials9084/retro190_solutions/mol_113_route_optimal.pdf]

COc1cc2c(Oc3cc(C)c(C)nc3-c3ccccc(C)n3)ccnc2cc1OCCNCCO

COc1cc2c(Oc3cc(C)c(C)nc3-c3ccccc(C)n3)ccnc2cc1O

OCCNCCBr

COc1cc2c(Cl)ccnc2cc1O

Cc1cc(O)cnc1C

Cc1ccccc(Br)n1

ClCCBr

NCCO
