# Supplementary material
Source: ML conference proceedings conference paper supplement (https://openreview.net/forum?id=m7uj1vIZ62)
Supplement: supplementary_material [file mol_117_route_optimal.pdf › materials9084/retro190_solutions/mol_117_route_optimal.pdf]

COCCCCC1(CNC(=O)C2CCCN2)c2cccc2Oc2cccc21

COCCCCC1(CN)c2cccc2Oc2cccc21

O=C(O)C1CCCN1

NCC1c2cccc2Oc2cccc21

COCCCCBr
