# Supplementary material
Source: ML conference proceedings conference paper supplement (https://openreview.net/forum?id=m7uj1vIZ62)
Supplement: supplementary_material [file mol_118_route_optimal.pdf › materials9084/retro190_solutions/mol_118_route_optimal.pdf]

CC(=O)NC[C@H]1CN(c2ccc3c(c2)CCc2c(C(C)C)n[nH]c2-3)C(=O)O1

CC(C)c1n[nH]c2c1CCc1cc(Br)ccc1-2

CC(=O)NC[C@H]1CNC(=O)O1

CC(C)Br

BrC1ccc2c(c1)CCc1cn[nH]c1-2

NC[C@H]1CNC(=O)O1

CC(=O)Cl

c1ccc2c(c1)CCc1cn[nH]c1-2

O=C1CCC(=O)N1Br
