# Supplementary material
Source: ML conference proceedings conference paper supplement (https://openreview.net/forum?id=m7uj1vIZ62)
Supplement: supplementary_material [file mol_119_route_optimal.pdf › materials9084/retro190_solutions/mol_119_route_optimal.pdf]

OC1CCc2sc(-c3ccncc3)cc2C1c1ccc(Cl)cc1

OC1CCc2sccc2C1c1ccc(Cl)cc1

OB(O)c1ccncc1

Clc1ccc(I)cc1

OC1CCc2sccc2C1
