# Supplementary material
Source: ML conference proceedings conference paper supplement (https://openreview.net/forum?id=m7uj1vIZ62)
Supplement: supplementary_material [file mol_120_route_optimal.pdf › materials9084/retro190_solutions/mol_120_route_optimal.pdf]

O=C(CO)N1CCC(c2ccc3c(c2)-n2nc(-c4ncnn4CC(F)(F)F)cc2CCO3)CC1

FC(F)(F)Cn1ncnc1-c1cc2n(n1)-c1cc(C3CCNCC3)ccc1OCC2

O=C(O)CO

C1CCNCC1

FC(F)(F)Cn1cncn1

BrC1ccc2c(c1)-n1nccc1CCO2

Cl

Cc1ccnn1-c1cc(Br)ccc1O
