# Supplementary material
Source: ML conference proceedings conference paper supplement (https://openreview.net/forum?id=m7uj1vIZ62)
Supplement: supplementary_material [file mol_121_route_optimal.pdf › materials9084/retro190_solutions/mol_121_route_optimal.pdf]

COCCCCc1cc(CN(C(=O)[C@H]2CNCC[C@@H]2c2ccc(OCCOc3c(Cl)cc(C)cc3Cl)cc2)C2CC2)cc(OCCOC)c1

COCCCCc1cc(CNC2CC2)cc(OCCOC)c1

Cc1cc(Cl)c(OCCOc2ccc([C@H]3CCNC[C@@H]3C(=O)O)cc2)c(Cl)c1

COCCCCc1cc(C=O)cc(OCCOC)c1

NC1CC1

O=C(O)[C@H]1CNCC[C@@H]1c1ccc(O)cc1

Cc1cc(Cl)c(OCCBr)c(Cl)c1

COCCOc1cccc(C=O)c1

COCCCBBr

Oc1ccc(Br)cc1

O=C(O)[C@@H]1CCCNC1

ClCCBr

Cc1cc(Cl)c(O)c(Cl)c1
