# Supplementary material
Source: ML conference proceedings conference paper supplement (https://openreview.net/forum?id=m7uj1vIZ62)
Supplement: supplementary_material [file mol_123_route_optimal.pdf › materials9084/retro190_solutions/mol_123_route_optimal.pdf]

CC(C)c1ccc2c(c1)OC1(O)c3ccccc3C(=O)C21NC(=O)C(=O)c1cccs1

O=C(O)C(=O)c1cccs1

CC(C)c1ccc2c(c1)OC1(O)c3ccccc3C(=O)C21N

CC(C)c1ccc2c(c1)OC1(O)[C]2C(=O)c2ccccc21

[N]

CC(C)c1ccc(Br)c(O)c1

O=C1CC(O)c2ccccc21
