# Supplementary material
Source: ML conference proceedings conference paper supplement (https://openreview.net/forum?id=m7uj1vIZ62)
Supplement: supplementary_material [file mol_124_route_optimal.pdf › materials9084/retro190_solutions/mol_124_route_optimal.pdf]

CN1CC[C@@H](c2c(O)cc(O)c3c(=O)cc(-c4ccc(C(F)(F)F)cc4)oc23)[C@@H]1CO

```
graph TD; A["CN1CC[C@@H](c2c(O)cc(O)c3c(=O)cc(-c4ccc(C(F)(F)F)cc4)oc23)[C@@H]1CO"] --> B["O=c1cc(-c2ccc(C(F)(F)F)cc2)oc2cc(O)cc(O)c12"]; A --> C["CN1CCC(=O)[C@@H]1CO"]; B --> D["OB(O)c1ccc(C(F)(F)F)cc1"]; B --> E["O=c1ccoc2cc(O)cc(O)c12"]; C --> F["CN1CCC(=O)C1"]; C --> G["C=O"];
```

O=c1cc(-c2ccc(C(F)(F)F)cc2)oc2cc(O)cc(O)c12

CN1CCC(=O)[C@@H]1CO

OB(O)c1ccc(C(F)(F)F)cc1

O=c1ccoc2cc(O)cc(O)c12

CN1CCC(=O)C1

C=O
