# Supplementary material
Source: ML conference proceedings conference paper supplement (https://openreview.net/forum?id=m7uj1vIZ62)
Supplement: supplementary_material [file mol_125_route_optimal.pdf › materials9084/retro190_solutions/mol_125_route_optimal.pdf]

N[C@H]1CC[C@H]1c1ccc(Cl)cc1

Clc1ccc(Br)cc1

NC1CCC1
