# Supplementary material
Source: ML conference proceedings conference paper supplement (https://openreview.net/forum?id=m7uj1vIZ62)
Supplement: supplementary_material [file mol_126_route_optimal.pdf › materials9084/retro190_solutions/mol_126_route_optimal.pdf]

CC(=O)Nc1cccc(N2CCN(CCc3nn(C)c(=O)n3CC3CCCCC3)CC2)c1

```
graph TD; A["CC(=O)Nc1cccc(N2CCN(CCc3nn(C)c(=O)n3CC3CCCCC3)CC2)c1"] --> B["Cn1nc(CC=O)n(CC2CCCCC2)c1=O"]; A --> C["CC(=O)Nc1cccc(N2CCNCC2)c1"]; B --> D["O=CCBr"]; B --> E["Cn1ncn(CC2CCCCC2)c1=O"];
```

Cn1nc(CC=O)n(CC2CCCCC2)c1=O

CC(=O)Nc1cccc(N2CCNCC2)c1

O=CCBr

Cn1ncn(CC2CCCCC2)c1=O
