# Supplementary material
Source: ML conference proceedings conference paper supplement (https://openreview.net/forum?id=m7uj1vIZ62)
Supplement: supplementary_material [file mol_127_route_optimal.pdf › materials9084/retro190_solutions/mol_127_route_optimal.pdf]

COC(=O)c1ccc2c(c1)C=CC(=CCl)CO2

ClCCl

COC(=O)c1ccc2c(c1)C=CCCO2

CCC

COC(=O)c1ccc(O)c(C=O)c1
