# Supplementary material
Source: ML conference proceedings conference paper supplement (https://openreview.net/forum?id=m7uj1vIZ62)
Supplement: supplementary_material [file mol_129_route_optimal.pdf › materials9084/retro190_solutions/mol_129_route_optimal.pdf]

CCCc1c(Cc2ccc(-c3ccccc3C#N)cc2F)c(=O)n([C@H]2CC[C@H](OCC3(C(C)=O)CCC3)CC2)c2ncnn12

N#Cc1ccccc1-c1ccc(CBr)c(F)c1

CCCc1cc(=O)n([C@H]2CC[C@H](OCC3(C(C)=O)CCC3)CC2)c2ncnn12

Cc1ccc(-c2ccccc2C#N)cc1F

CCCc1cc(=O)[nH]c2ncnn12

CC(=O)C1(COC2CCC(=O)CC2)CCC1

O=C1CCC(=O)N1Br

CC(=O)C1(C)CCC1

O=C1CCC(O)CC1
