# Supplementary material
Source: ML conference proceedings conference paper supplement (https://openreview.net/forum?id=m7uj1vIZ62)
Supplement: supplementary_material [file mol_130_route_optimal.pdf › materials9084/retro190_solutions/mol_130_route_optimal.pdf]

CC(=O)NC[C@H]1CC[C@@H](C(=O)Nc2cccc(OC(F)(F)F)c2)N1



```
graph TD; A["CC(=O)NC[C@H]1CC[C@@H](C(=O)Nc2cccc(OC(F)(F)F)c2)N1"] --> B["Nc1cccc(OC(F)(F)F)c1"]; A --> C["CC(=O)NC[C@H]1CC[C@@H](C(=O)O)N1"]; C --> D["CC(=O)NCC(=O)OC(C)(C)C"]; C --> E["O=C(O)[C@@H]1CCCN1"];
```

Nc1cccc(OC(F)(F)F)c1

CC(=O)NC[C@H]1CC[C@@H](C(=O)O)N1

CC(=O)NCC(=O)OC(C)(C)C

O=C(O)[C@@H]1CCCN1
