# Supplementary material
Source: ML conference proceedings conference paper supplement (https://openreview.net/forum?id=m7uj1vIZ62)
Supplement: supplementary_material [file mol_131_route_optimal.pdf › materials9084/retro190_solutions/mol_131_route_optimal.pdf]

Oc1ccc2c3c(ccc2c1)Cc1ccccc1OC3c1ccc(OCCN2CCCCC2)cc1

O=Cc1ccc(OCCN2CCCCC2)cc1

Oc1ccc2cc(Cc3ccccc3O)ccc2c1

Oc1ccccc1

Oc1ccc2cc(CBr)ccc2c1
