# Supplementary material
Source: ML conference proceedings conference paper supplement (https://openreview.net/forum?id=m7uj1vIZ62)
Supplement: supplementary_material [file mol_133_route_optimal.pdf › materials9084/retro190_solutions/mol_133_route_optimal.pdf]

COCCCCc1cc(CN(C(=O)[C@H]2CN(C(=O)OC(C)(C)C)CC[C@@H]2c2ccc(OCCOc3c(Cl)cc(C)cc3Cl)cc2)C2CC2)cc(OCC2(CC(=O)O)CC2)c1

COCCCCc1cc(CNC2CC2)cc(OCC2(CC(=O)O)CC2)c1

Cc1cc(Cl)c(OCCOc2ccc([C@H]3CCN(C(=O)OC(C)(C)C)C[C@@H]3C(=O)O)cc2)c(Cl)c1

O=C(O)CC1(CBr)CC1

COCCCCc1cc(O)cc(CNC2CC2)c1

Cc1cc(Cl)c(OCCOc2ccc(C3CCN(C(=O)OC(C)(C)C)CC3)cc2)c(Cl)c1

O=C=O

O=C(O)CBr

BrCC1CC1

Oc1cccc(CNC2CC2)c1

COCCCBBr

CCOc1c(Cl)cc(C)cc1Cl

Oc1ccc(Br)cc1

CC(C)(C)OC(=O)N1CCCCC1
