# Supplementary material
Source: ML conference proceedings conference paper supplement (https://openreview.net/forum?id=m7uj1vIZ62)
Supplement: supplementary_material [file mol_135_route_optimal.pdf › materials9084/retro190_solutions/mol_135_route_optimal.pdf]

C[C@H](O[Si](C)(C)C(C)(C)C)[C@@H]1CC(=O)CC(C)(C)N1

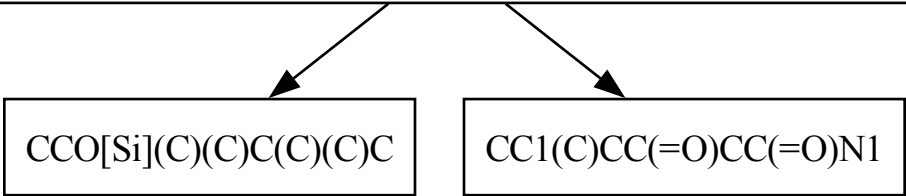

The diagram illustrates the fragmentation of a chemical structure. A top box contains the full SMILES string. Two arrows point from this box to two bottom boxes, representing the fragments. The left arrow originates from the bond between the silicon atom and the chiral carbon, and the right arrow originates from the bond between the chiral carbon and the first carbon of the five-membered ring.

CCO[Si](C)(C)C(C)(C)C

CC1(C)CC(=O)CC(=O)N1
