# Supplementary material
Source: ML conference proceedings conference paper supplement (https://openreview.net/forum?id=m7uj1vIZ62)
Supplement: supplementary_material [file mol_137_route_optimal.pdf › materials9084/retro190_solutions/mol_137_route_optimal.pdf]

O=C(O)[C@H]1CCOC[C@H]1c1ccc(I)cc1

The diagram illustrates the decomposition of a chemical SMILES string. A top box contains the full string: O=C(O)[C@H]1CCOC[C@H]1c1ccc(I)cc1. Two arrows point downwards from this box to two separate boxes below. The left box contains the fragment O=C(O)C1CCOCC1, and the right box contains the fragment Ic1ccc(I)cc1.

O=C(O)C1CCOCC1

Ic1ccc(I)cc1
