# Supplementary material
Source: ML conference proceedings conference paper supplement (https://openreview.net/forum?id=m7uj1vIZ62)
Supplement: supplementary_material [file mol_138_route_optimal.pdf › materials9084/retro190_solutions/mol_138_route_optimal.pdf]

COC(=O)[C@H]1CN(C(=O)OC(C)(C)C)CC[C@@H]1c1ccc(OCCOc2c(Cl)cc(C)cc2Cl)cc1



```
graph TD; A["COC(=O)[C@H]1CN(C(=O)OC(C)(C)C)CC[C@@H]1c1ccc(OCCOc2c(Cl)cc(C)cc2Cl)cc1"] --> B["COC(=O)[C@H]1CN(C(=O)OC(C)(C)C)CC[C@@H]1c1ccc(O)cc1"]; A --> C["Cc1cc(Cl)c(OCCBr)c(Cl)c1"]; B --> D["Oc1ccc(Br)cc1"]; B --> E["COC(=O)[C@@H]1CCCN(C(=O)OC(C)(C)C)C1"]; C --> F["ClCCBr"]; C --> G["Cc1cc(Cl)c(O)c(Cl)c1"];
```

COC(=O)[C@H]1CN(C(=O)OC(C)(C)C)CC[C@@H]1c1ccc(O)cc1

Cc1cc(Cl)c(OCCBr)c(Cl)c1

Oc1ccc(Br)cc1

COC(=O)[C@@H]1CCCN(C(=O)OC(C)(C)C)C1

ClCCBr

Cc1cc(Cl)c(O)c(Cl)c1
