# Supplementary material
Source: ML conference proceedings conference paper supplement (https://openreview.net/forum?id=m7uj1vIZ62)
Supplement: supplementary_material [file mol_139_route_optimal.pdf › materials9084/retro190_solutions/mol_139_route_optimal.pdf]

O=C1C=C(N2CCNCC2)C(C2CCCCC2)CC1

```
graph TD; A["O=C1C=C(N2CCNCC2)C(C2CCCCC2)CC1"] --> B["O=C1C=CCCC1"]; A --> C["C1CNCCN1"]; A --> D["[Mg+]C1CCCCC1"];
```

O=C1C=CCCC1

C1CNCCN1

[Mg+]C1CCCCC1
