# Supplementary material
Source: ML conference proceedings conference paper supplement (https://openreview.net/forum?id=m7uj1vIZ62)
Supplement: supplementary_material [file mol_140_route_optimal.pdf › materials9084/retro190_solutions/mol_140_route_optimal.pdf]

CC(C)S(=O)(=O)N[C@H]1CCOC[C@H]1c1ccc(-c2ccc(C#N)s2)cc1

N#Cc1ccc(Br)s1

CC(C)S(=O)(=O)N[C@H]1CCOC[C@H]1c1ccc(Br)cc1

Br1ccc(I)cc1

CC(C)S(=O)(=O)NC1CCOCC1
