# Supplementary material
Source: ML conference proceedings conference paper supplement (https://openreview.net/forum?id=m7uj1vIZ62)
Supplement: supplementary_material [file mol_141_route_optimal.pdf › materials9084/retro190_solutions/mol_141_route_optimal.pdf]

CNC(=O)c1ccc2ncc(C(=O)OCn3ccnc3)c(Nc3ccc(OC)cc3)c2c1

```
graph TD; A["CNC(=O)c1ccc2ncc(C(=O)OCn3ccnc3)c(Nc3ccc(OC)cc3)c2c1"] --> B["CN"]; A --> C["COc1ccc(Nc2c(C(=O)OCn3ccnc3)cnc3ccc(C(=O)O)cc23)cc1"]; C --> D["OCn1ccnc1"]; C --> E["COc1ccc(Nc2c(C(=O)O)cnc3ccc(C(=O)O)cc23)cc1"];
```

CN

COc1ccc(Nc2c(C(=O)OCn3ccnc3)cnc3ccc(C(=O)O)cc23)cc1

OCn1ccnc1

COc1ccc(Nc2c(C(=O)O)cnc3ccc(C(=O)O)cc23)cc1
