# Supplementary material
Source: ML conference proceedings conference paper supplement (https://openreview.net/forum?id=m7uj1vIZ62)
Supplement: supplementary_material [file mol_142_route_optimal.pdf › materials9084/retro190_solutions/mol_142_route_optimal.pdf]

ClCc1ccc2c(c1)Nc1ncnc1S2

c1ccc2c(c1)Nc1ncnc1S2

ClCCl

Sc1ccccc1Br

Nc1cncn1
