# Supplementary material
Source: ML conference proceedings conference paper supplement (https://openreview.net/forum?id=m7uj1vIZ62)
Supplement: supplementary_material [file mol_143_route_optimal.pdf › materials9084/retro190_solutions/mol_143_route_optimal.pdf]

CCOC(=O)[C@H]1[C@H](c2ccc3c(c2)OC(F)(F)O3)C1(C)C

CCOC(=O)CC(C)C

O=Cc1ccc2c(c1)OC(F)(F)O2
