# Supplementary material
Source: ML conference proceedings conference paper supplement (https://openreview.net/forum?id=m7uj1vIZ62)
Supplement: supplementary_material [file mol_144_route_optimal.pdf › materials9084/retro190_solutions/mol_144_route_optimal.pdf]

CCC/C=C/[C@H]1CC[C@H](C(CO)CO)CC1

C[C@H]1CC[C@H](C(CO)CO)CC1

CCCC=O

OCCCCO

CC1CCC(=O)CC1
