# Supplementary material
Source: ML conference proceedings conference paper supplement (https://openreview.net/forum?id=m7uj1vIZ62)
Supplement: supplementary_material [file mol_145_route_optimal.pdf › materials9084/retro190_solutions/mol_145_route_optimal.pdf]

CCCCCN1C(=O)C2(CNC(=O)c3cc4c(cc32)OCO4)c2cccc21

O=C1NCC2(C(=O)Nc3cccc32)c2cc3c(cc21)OCO3

CCCCCBr

NCC1(c2cc3c(cc2C(=O)O)OCO3)C(=O)Nc2cccc21

NCC1C(=O)Nc2cccc21

O=C(O)c1cc2c(cc1Br)OCO2
