# Supplementary material
Source: ML conference proceedings conference paper supplement (https://openreview.net/forum?id=m7uj1vIZ62)
Supplement: supplementary_material [file mol_146_route_optimal.pdf › materials9084/retro190_solutions/mol_146_route_optimal.pdf]

CC(C)S(=O)(=O)N[C@H]1CCOC[C@H]1c1ccc(I)cc1

The diagram illustrates the fragmentation of a chemical structure. A top box contains the full SMILES string. Two arrows point from this box to two separate boxes below. The left arrow points to a box containing the SMILES string for the left fragment, and the right arrow points to a box containing the SMILES string for the right fragment.

CC(C)S(=O)(=O)NC1CCOCC1

Ic1ccc(I)cc1
