# Supplementary material
Source: ML conference proceedings conference paper supplement (https://openreview.net/forum?id=m7uj1vIZ62)
Supplement: supplementary_material [file mol_147_route_optimal.pdf › materials9084/retro190_solutions/mol_147_route_optimal.pdf]

CCc1[nH]c(C(=O)N[C@H]2CCN(c3nc(C(=O)O)c(C)s3)C[C@H]2OC)nc1C(F)(F)F

CO[C@@H]1CN(c2nc(C(=O)O)c(C)s2)CC[C@@H]1N

CCc1[nH]c(C(=O)O)nc1C(F)(F)F

CO[C@@H]1CNCC[C@@H]1NC(=O)OC(C)(C)C

Cc1scnc1C(=O)O

O=C(O)c1nc(C(F)(F)F)c[nH]1

CCI
