# Supplementary material
Source: ML conference proceedings conference paper supplement (https://openreview.net/forum?id=m7uj1vIZ62)
Supplement: supplementary_material [file mol_148_route_optimal.pdf › materials9084/retro190_solutions/mol_148_route_optimal.pdf]

CC1(C)Oc2ccc(CC(=O)NC3CCc4ccccc43)cc2C(N)C1O

```
graph TD; A[CC1(C)Oc2ccc(CC(=O)NC3CCc4ccccc43)cc2C(N)C1O] --> B[Cc1ccc2c(c1)C(N)C(O)C(C)(C)O2]; A --> C[O=C=NC1CCc2ccccc21]; B --> D[CC(C)=O]; B --> E[Cc1ccc(O)c(C(N)CO)c1]
```

Cc1ccc2c(c1)C(N)C(O)C(C)(C)O2

O=C=NC1CCc2ccccc21

CC(C)=O

Cc1ccc(O)c(C(N)CO)c1
