# Supplementary material
Source: ML conference proceedings conference paper supplement (https://openreview.net/forum?id=m7uj1vIZ62)
Supplement: supplementary_material [file mol_151_route_optimal.pdf › materials9084/retro190_solutions/mol_151_route_optimal.pdf]

CCOC(=O)CCc1cc2cc(-c3noc(-c4ccc(OC(C)C)c(Cl)c4)n3)ccc2[nH]1

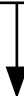

CCOC(=O)CCc1cc2cc(C(N)=NOC(=O)c3ccc(OC(C)C)c(Cl)c3)ccc2[nH]1

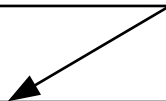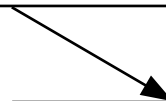

CCOC(=O)CCc1cc2cc(C(N)=NO)ccc2[nH]1

CC(C)Oc1ccc(C(=O)O)cc1Cl

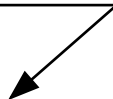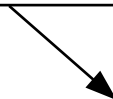

NC(=NO)c1ccc2[nH]ccc2c1

CCOC(=O)CCBr
