# Supplementary material
Source: ML conference proceedings conference paper supplement (https://openreview.net/forum?id=m7uj1vIZ62)
Supplement: supplementary_material [file mol_152_route_optimal.pdf › materials9084/retro190_solutions/mol_152_route_optimal.pdf]

OC[C@H]1O[C@](O)(c2ccc(Cl)c(Cc3ccc(C#Cc4cnccn4)cc3)c2)[C@H](O)[C@@H](O)[C@@H]1O

OC[C@H]1O[C@](O)(c2ccc(Cl)c(Cc3ccc(Br)cc3)c2)[C@H](O)[C@@H](O)[C@@H]1O

C#Cc1cnccn1

OC[C@H]1O[C@H](O)[C@H](O)[C@@H](O)[C@@H]1O

Clc1ccccc1C(Cl)c1ccc(Br)cc1
