# Supplementary material
Source: ML conference proceedings conference paper supplement (https://openreview.net/forum?id=m7uj1vIZ62)
Supplement: supplementary_material [file mol_157_route_optimal.pdf › materials9084/retro190_solutions/mol_157_route_optimal.pdf]

C[C@H](c1ccccc1)N1C[C@]2(C(=O)OC(C)(C)C)C=CC[C@@H]2C1=O

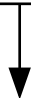

C[C@@H](NC[C@]1(C(=O)OC(C)(C)C)C=CC[C@@H]1C(=O)O)c1ccccc1

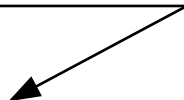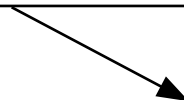

CC(C)(C)OC(=O)[C@@H]1C=CC[C@@H]1C(=O)O

C[C@@H](NC=O)c1ccccc1

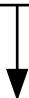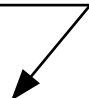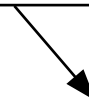

CC(C)(C)OC(=O)CCCCC(=O)O

O=CO

C[C@@H](N)c1ccccc1
