# Supplementary material
Source: ML conference proceedings conference paper supplement (https://openreview.net/forum?id=m7uj1vIZ62)
Supplement: supplementary_material [file mol_158_route_optimal.pdf › materials9084/retro190_solutions/mol_158_route_optimal.pdf]

COC[C@H](C)COCc1ccc([C@@]2(O)CCN(C(=O)OC(C)(C)C)C[C@@H]2C=NO)cc1

COC[C@H](C)COCc1ccc([C@@]2(O)CCN(C(=O)OC(C)(C)C)C[C@@H]2C)cc1

N=O

BrCc1ccccc1

C[C@H]1CN(C(=O)OC(C)(C)C)CC[C@@H]1O

COC[C@H](C)CO

O=C(O)c1cccc(Cl)c1

N
