# Supplementary material
Source: ML conference proceedings conference paper supplement (https://openreview.net/forum?id=m7uj1vIZ62)
Supplement: supplementary_material [file mol_161_route_optimal.pdf › materials9084/retro190_solutions/mol_161_route_optimal.pdf]

C[C@@H](O)c1nc2cnc3ccsc3c2n1[C@H]1CC[C@H](CO)CC1

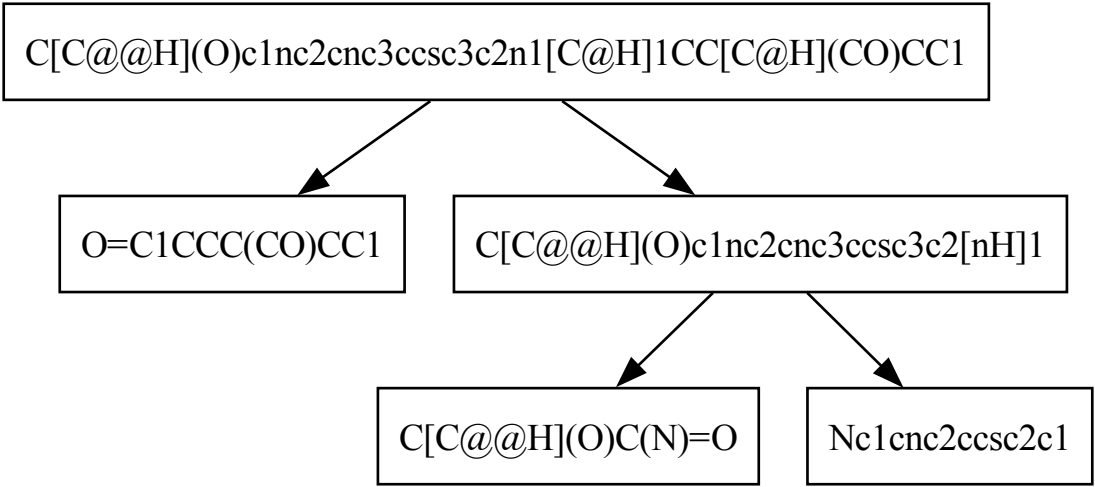

```
graph TD; A["C[C@@H](O)c1nc2cnc3ccsc3c2n1[C@H]1CC[C@H](CO)CC1"] --> B["O=C1CCC(CO)CC1"]; A --> C["C[C@@H](O)c1nc2cnc3ccsc3c2[nH]1"]; C --> D["C[C@@H](O)C(N)=O"]; C --> E["Nc1cnc2ccsc2c1"];
```

O=C1CCC(CO)CC1

C[C@@H](O)c1nc2cnc3ccsc3c2[nH]1

C[C@@H](O)C(N)=O

Nc1cnc2ccsc2c1
