# Supplementary material
Source: ML conference proceedings conference paper supplement (https://openreview.net/forum?id=m7uj1vIZ62)
Supplement: supplementary_material [file mol_162_route_optimal.pdf › materials9084/retro190_solutions/mol_162_route_optimal.pdf]

O=C(Nc1cccc(Cl)c1)N1CCc2[nH]nc(C(=O)N3CC(F)CO3)c2C1

FC1CNOC1

O=C(O)c1n[nH]c2c1CN(C(=O)Nc1cccc(Cl)c1)CC2

O=C(OO)c1cccc(Cl)c1

CC(F)CN

O=C(O)c1n[nH]c2c1CNCC2

O=C=Nc1cccc(Cl)c1
