# Supplementary material
Source: ML conference proceedings conference paper supplement (https://openreview.net/forum?id=m7uj1vIZ62)
Supplement: supplementary_material [file mol_163_route_optimal.pdf › materials9084/retro190_solutions/mol_163_route_optimal.pdf]

CC(C)(C)OC(=O)NC1(c2nc(O)c3c(Cl)ccn3n2)CC1

O=C1CCC(=O)N1Cl

CC(C)(C)OC(=O)NC1(c2nc(O)c3cccn3n2)CC1

BrC1CC1

Oc1ncnn2cccc12

CC(C)(C)OC(N)=O
