# Supplementary material
Source: ML conference proceedings conference paper supplement (https://openreview.net/forum?id=m7uj1vIZ62)
Supplement: supplementary_material [file mol_169_route_optimal.pdf › materials9084/retro190_solutions/mol_169_route_optimal.pdf]

C[C@@H](n1ncn(-c2ccc(Cl)cc2)c1=O)[C@@]1(c2ccc(F)cc2F)CO1

Clc1ccc(I)cc1

C[C@@H](n1nc[nH]c1=O)[C@@]1(c2ccc(F)cc2F)CO1

Fc1ccc(Br)c(F)c1

C1CO1

CCn1nc[nH]c1=O
