# Supplementary material
Source: ML conference proceedings conference paper supplement (https://openreview.net/forum?id=m7uj1vIZ62)
Supplement: supplementary_material [file mol_171_route_optimal.pdf › materials9084/retro190_solutions/mol_171_route_optimal.pdf]

CCOC(=O)/C=C1CC[C@@H](c2ccccc(F)c2F)[C@H](NC(=O)OC(C)(C)C)c2cccn21

CC(C)(C)OC(=O)N[C@@H]1c2cccn2CCC[C@H]1c1ccccc(F)c1F

CCOC(=O)CP(=O)(OCC)OCC

Fc1ccccc(Br)c1F

CC(C)(C)OC(=O)N[C@H]1CCCCc2ncccc21

O=C1CCCCc2ncccc21

CC(C)(C)OC(N)=O
