# Supplementary material
Source: ML conference proceedings conference paper supplement (https://openreview.net/forum?id=m7uj1vIZ62)
Supplement: supplementary_material [file mol_172_route_optimal.pdf › materials9084/retro190_solutions/mol_172_route_optimal.pdf]

CCC/C=C/[C@H]1CC[C@H](C(C(=O)O)C(=O)O)CC1

O=C(O)CC(=O)O

CCCCCCC1CCCCC1
