# Supplementary material
Source: ML conference proceedings conference paper supplement (https://openreview.net/forum?id=m7uj1vIZ62)
Supplement: supplementary_material [file mol_174_route_optimal.pdf › materials9084/retro190_solutions/mol_174_route_optimal.pdf]

C[C@H](C(=O)NCCF)N(C)C(=O)c1ccc2c(c1)c1c(n2C)CCC(C2CCOCC2)C1

CN[C@H](C)C(=O)NCCF

Cn1c2c(c3cc(C(=O)O)ccc31)CC(C1CCOCC1)CC2

NCCF

CN[C@H](C)C(=O)O

[Mg+]C1CCOCC1

Cn1c2c(c3cc(C(=O)O)ccc31)CCCC2

O=C(O)c1ccc2[nH]c3c(c2c1)CCCC3

Cl
