# Supplementary material
Source: ML conference proceedings conference paper supplement (https://openreview.net/forum?id=m7uj1vIZ62)
Supplement: supplementary_material [file mol_177_route_optimal.pdf › materials9084/retro190_solutions/mol_177_route_optimal.pdf]

FC(F)(F)Cn1ncnc1-c1cc2n(n1)-c1cc(C3CCNCC3)ccc1OCC2

```
graph TD; A["FC(F)(F)Cn1ncnc1-c1cc2n(n1)-c1cc(C3CCNCC3)ccc1OCC2"] --> B["C1CCNCC1"]; A --> C["FC(F)(F)Cn1ncnc1"]; A --> D["Br1ccc2c(c1)-n1nccc1CCO2"]; D --> E["Cl"]; D --> F["Cc1ccnn1-c1cc(Br)ccc1O"];
```

C1CCNCC1

FC(F)(F)Cn1ncnc1

Br1ccc2c(c1)-n1nccc1CCO2

Cl

Cc1ccnn1-c1cc(Br)ccc1O
