# Supplementary material
Source: ML conference proceedings conference paper supplement (https://openreview.net/forum?id=m7uj1vIZ62)
Supplement: supplementary_material [file mol_178_route_optimal.pdf › materials9084/retro190_solutions/mol_178_route_optimal.pdf]

CCOC(=O)/C(N)=N/Nc1cc(Cl)ccc1[N+](=O)[O-]

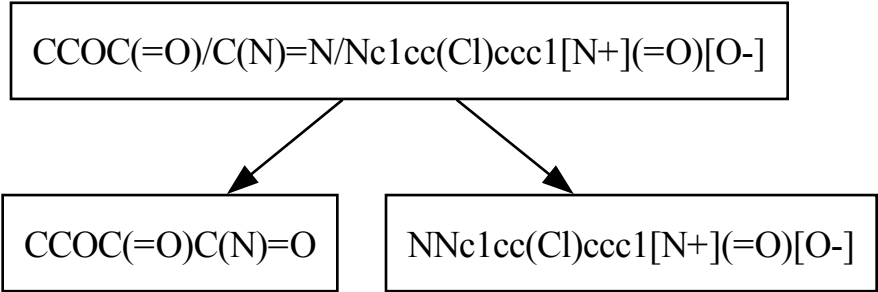

```
graph TD; A["CCOC(=O)/C(N)=N/Nc1cc(Cl)ccc1[N+](=O)[O-]"] --> B["CCOC(=O)C(N)=O"]; A --> C["NNc1cc(Cl)ccc1[N+](=O)[O-]"]
```

CCOC(=O)C(N)=O

NNc1cc(Cl)ccc1[N+](=O)[O-]
