# Supplementary material
Source: ML conference proceedings conference paper supplement (https://openreview.net/forum?id=m7uj1vIZ62)
Supplement: supplementary_material [file mol_179_route_optimal.pdf › materials9084/retro190_solutions/mol_179_route_optimal.pdf]

CCCN(CCC)Cc1cc(CO)c(=O)n2c(-c3c(C)cc(C)cc3C)cccc12

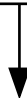

CCCN(CCC)Cc1cc(CO)c(=O)[nH]c1C=CC=C(O)c1c(C)cc(C)cc1C

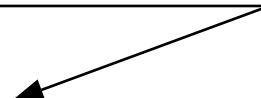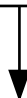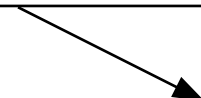

C=CC=C(O)c1c(C)cc(C)cc1C

Cc1cc(CO)c(=O)[nH]c1Br

CCCNCCC

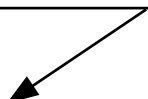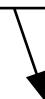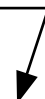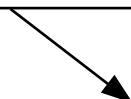

Cc1cc(C)c(C(=O)O)c(C)c1

C=CC

CC(C)C(=O)Br

NC(=O)CCO
