# Supplementary material
Source: ML conference proceedings conference paper supplement (https://openreview.net/forum?id=m7uj1vIZ62)
Supplement: supplementary_material [file mol_180_route_optimal.pdf › materials9084/retro190_solutions/mol_180_route_optimal.pdf]

COc1cc2ncc3c(N)nc(-c4encc(OCCN(Cc5ccc(F)cc5)C(=O)OC(C)(C)C)c4)cc3c2cc1OC

COc1cc2ncc3c(N)nc3c2cc1OC

CC(C)(C)OC(=O)N(CCOc1encc(B2OC(C)(C)C(C)(C)O2)c1)Cc1ccc(F)cc1

COc1cc2c(cc1O)ncc1c(N)nc12

Cl

CC1(C)OB(c2encc(Cl)c2)OC1(C)C

CC(C)(C)OC(=O)N(CCO)Cc1ccc(F)cc1

Nc1nc1C=O

COc1ccc(N)cc1O
