# Supplementary material
Source: ML conference proceedings conference paper supplement (https://openreview.net/forum?id=m7uj1vIZ62)
Supplement: supplementary_material [file mol_181_route_optimal.pdf › materials9084/retro190_solutions/mol_181_route_optimal.pdf]

CC(C)(C)OC(=O)N[C@@H]1c2cccnc2[C@H](N)CC[C@H]1c1cccc(F)c1F

Fc1cccc(Br)c1F

CC(C)(C)OC(=O)N[C@H]1CCC[C@@H](N)c2ncccc21

CC(C)(C)OC(=O)N[C@H]1CCCCc2ncccc21

CC(C)(C)OC(N)=O

O=C1CCCCc2ncccc21
