# Supplementary material
Source: ML conference proceedings conference paper supplement (https://openreview.net/forum?id=m7uj1vIZ62)
Supplement: supplementary_material [file mol_183_route_optimal.pdf › materials9084/retro190_solutions/mol_183_route_optimal.pdf]

CC(=O)c1ccc2c(c1)C=CC(O)(CO)CO2



```
graph TD; A["CC(=O)c1ccc2c(c1)C=CC(O)(CO)CO2"] --> B["CC(=O)c1ccc(O)c(C=O)c1"]; A --> C["CC(C)(O)CO"]
```

CC(=O)c1ccc(O)c(C=O)c1

CC(C)(O)CO
