# Supplementary material
Source: ML conference proceedings conference paper supplement (https://openreview.net/forum?id=m7uj1vIZ62)
Supplement: supplementary_material [file mol_184_route_optimal.pdf › materials9084/retro190_solutions/mol_184_route_optimal.pdf]

COc1ccc(C[C@H](C[C@H](O[Si](C)(C)C(C)(C)C)[C@H](CC2CCCCC2)NC(=O)OC(C)(C)C(=O)O)c(OC)c1OC

COc1ccc(C[C@H](CO)C(=O)O)c(OC)c1OC

CC(C)(C)OC(=O)N[C@H](CO[Si](C)(C)C(C)(C)C)CC1CCCCC1

COc1ccc(CBr)c(OC)c1OC

O=C(O)CCO

CC(C)(C)OC(=O)N[C@H](CO)CC1CCCCC1

CC(C)(C)[Si](C)(C)O
