# Supplementary material
Source: ML conference proceedings conference paper supplement (https://openreview.net/forum?id=m7uj1vIZ62)
Supplement: supplementary_material [file mol_185_route_optimal.pdf › materials9084/retro190_solutions/mol_185_route_optimal.pdf]

CN1CCN(c2ccc3c(c2)[nH]c2c(C(N)=O)cc(-c4ccc(O)c(Cl)c4)nc23)CC1

CN1CCN(c2ccc3c(c2)[nH]c2c(C(N)=O)ccnc23)CC1

Oc1ccc(Br)cc1Cl

Br1ccc2c(c1)[nH]c1ccnc12

CN1CCNCC1

NC=O

O=C1CCC(=O)N1Br

c1ccc2c(c1)[nH]c1ccnc12
