# Supplementary material
Source: ML conference proceedings conference paper supplement (https://openreview.net/forum?id=m7uj1vIZ62)
Supplement: supplementary_material [file mol_186_route_optimal.pdf › materials9084/retro190_solutions/mol_186_route_optimal.pdf]

CC1(C)COCc2nc3cnc(Br)cc3n21

CC1(C)COCC(=O)N1

Nc1ccc(Br)nc1
