# Supplementary material
Source: ML conference proceedings conference paper supplement (https://openreview.net/forum?id=m7uj1vIZ62)
Supplement: supplementary_material [file mol_188_route_optimal.pdf › materials9084/retro190_solutions/mol_188_route_optimal.pdf]

CC(C)c1ccc(-n2nc(O)c3c(=O)c4ccc(Cl)cc4[nH]c3c2=O)cc1

CC(C)c1ccc(B(O)O)cc1

O=c1[nH]nc(O)c2c(=O)c3ccc(Cl)cc3[nH]c12

Nc1cc(Cl)ccc1C(=O)O

O=c1ccc(O)n[nH]1
