# Supplementary material (part 1 of 2)
Source: ML conference proceedings conference paper supplement (https://openreview.net/forum?id=m7uj1vIZ62)

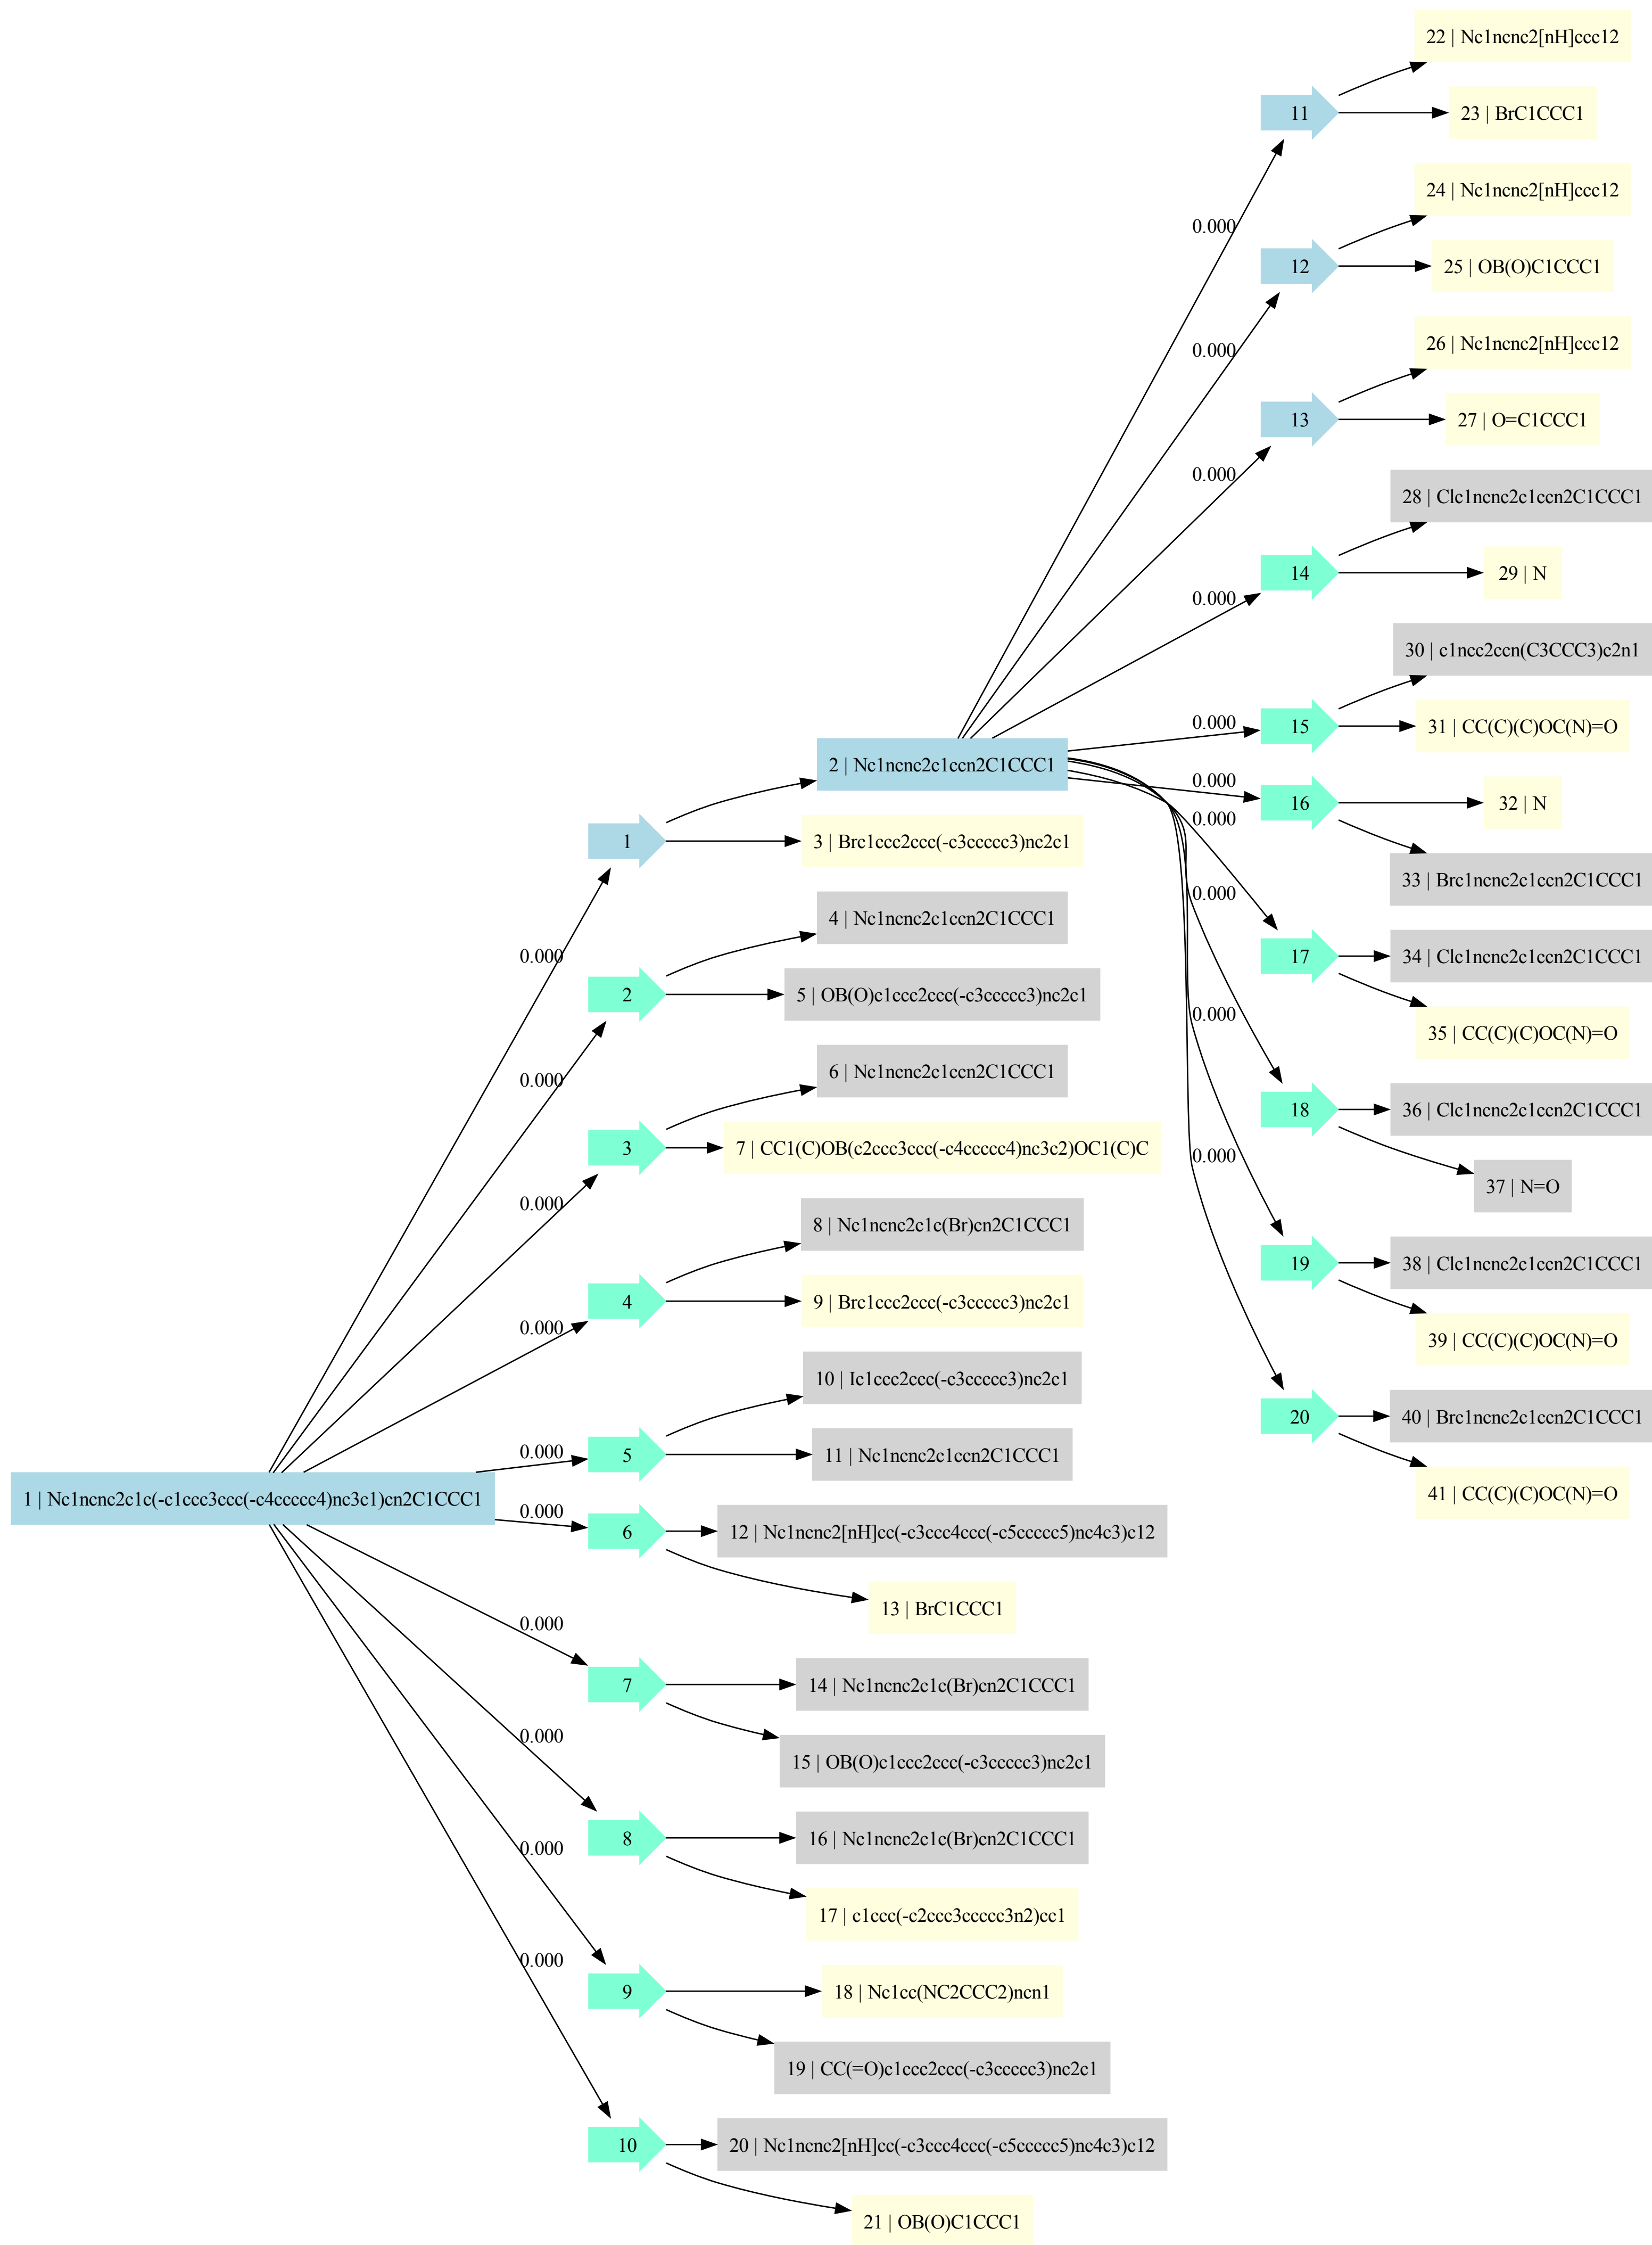

Supplement: supplementary_material [file mol_0_search_tree.pdf › materials9084/retro190_solutions/mol_0_search_tree.pdf]

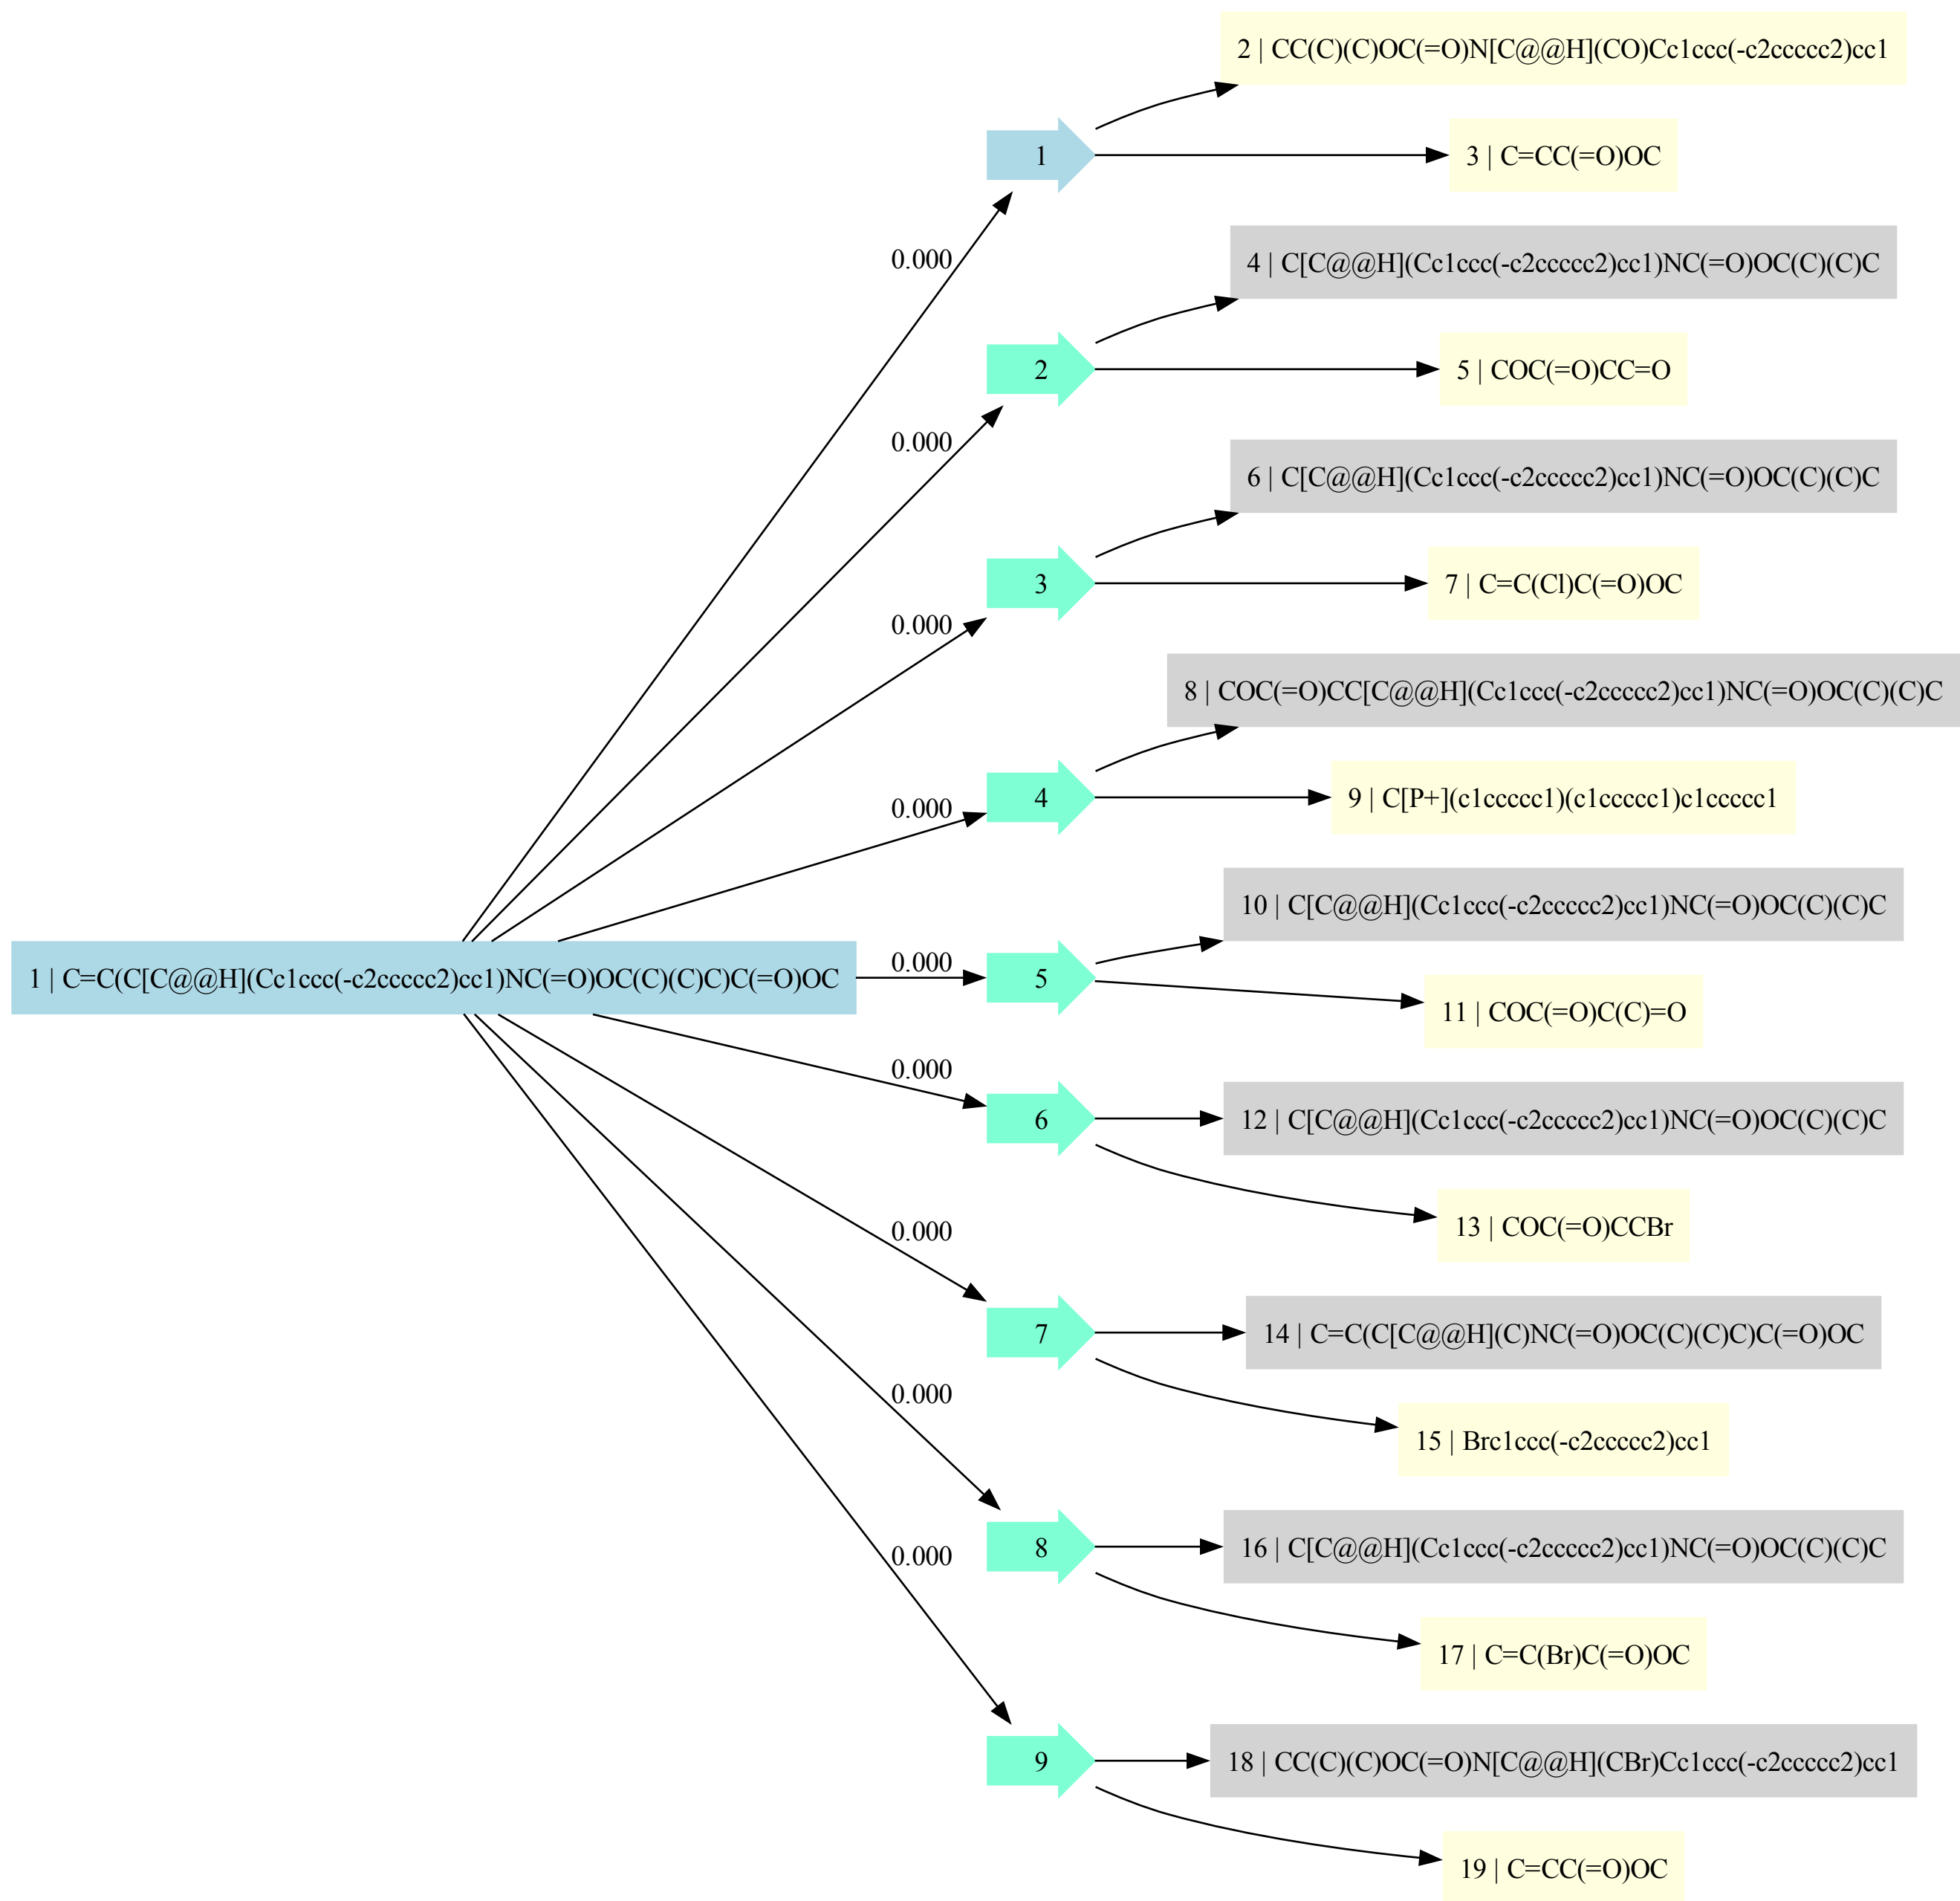

Supplement: supplementary_material [file mol_101_search_tree.pdf › materials9084/retro190_solutions/mol_101_search_tree.pdf]

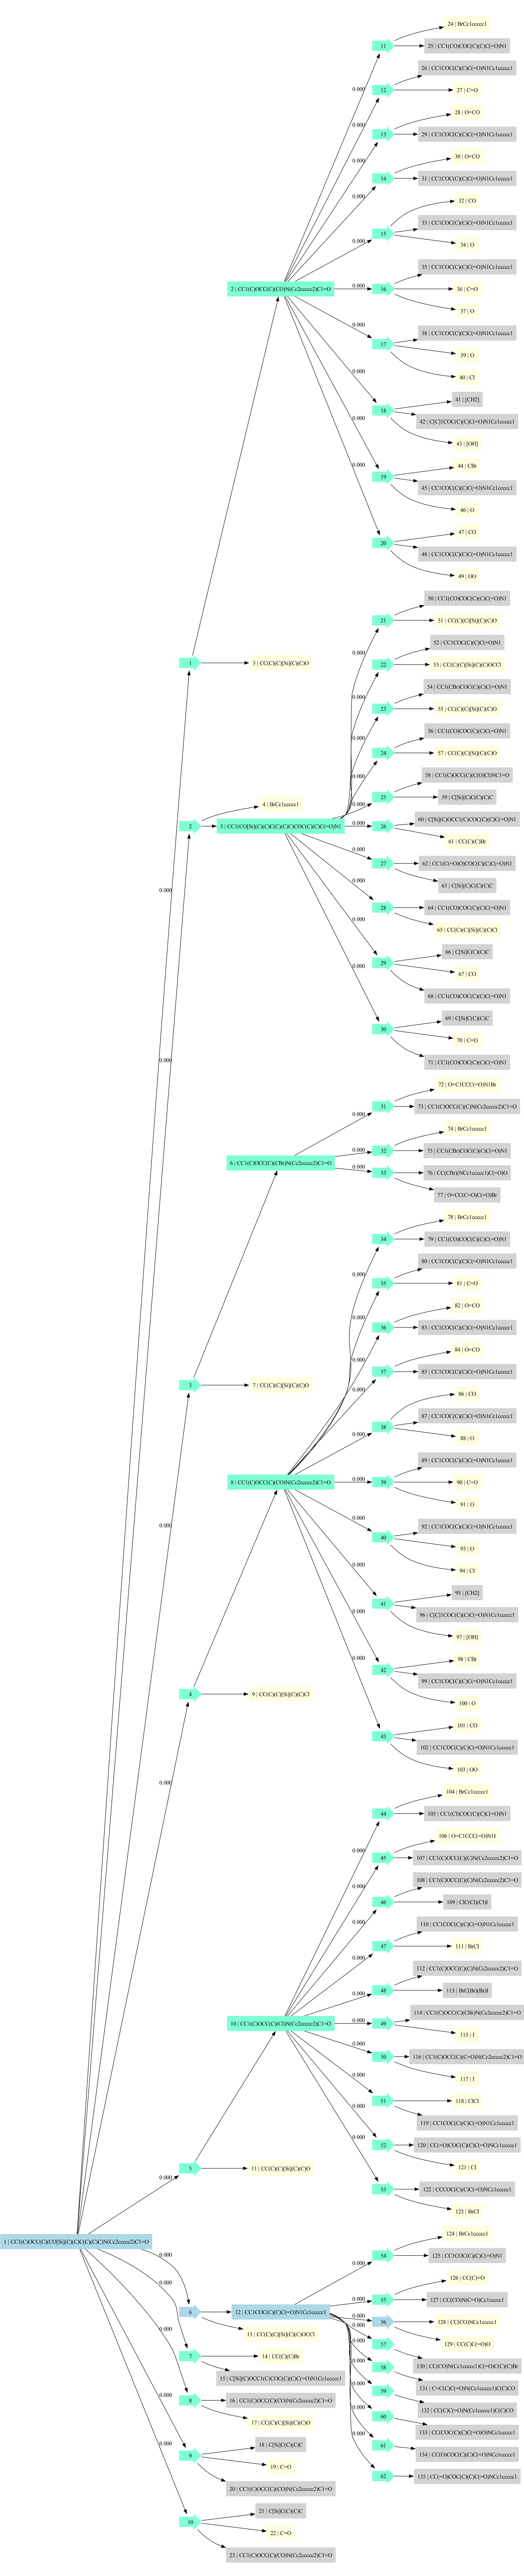

Supplement: supplementary_material [file mol_102_search_tree.pdf › materials9084/retro190_solutions/mol_102_search_tree.pdf]

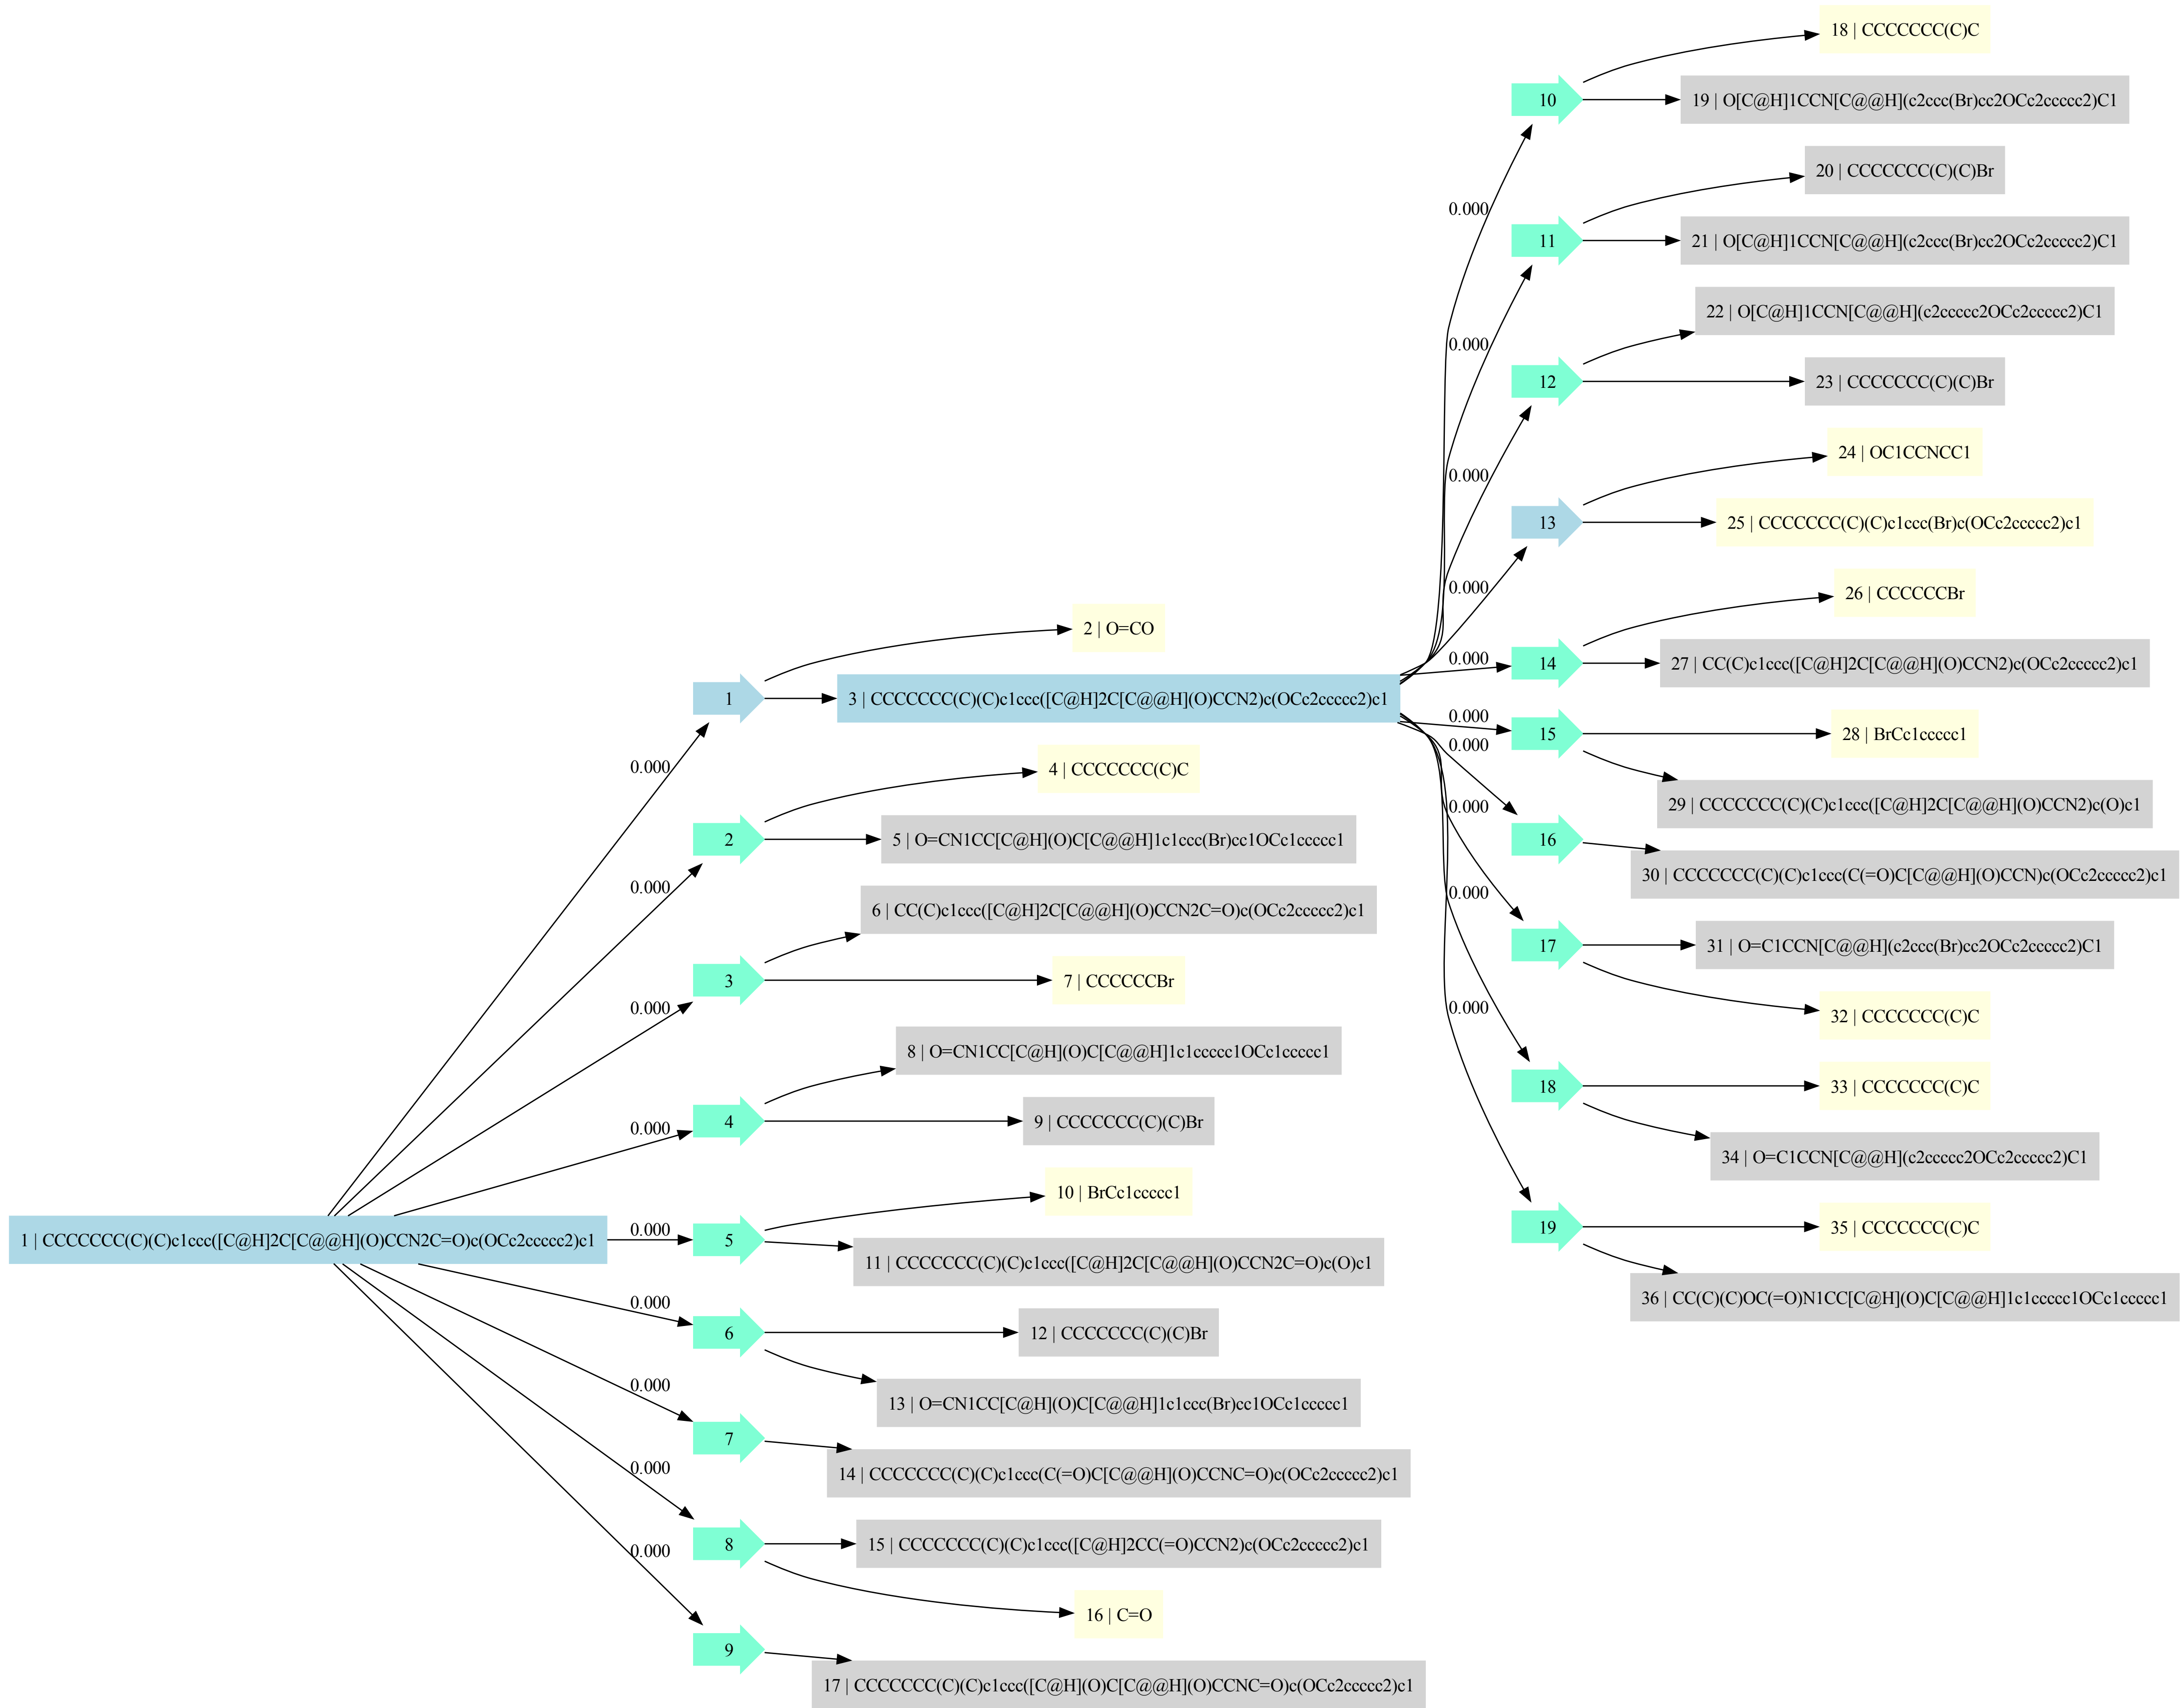

Supplement: supplementary_material [file mol_104_search_tree.pdf › materials9084/retro190_solutions/mol_104_search_tree.pdf]

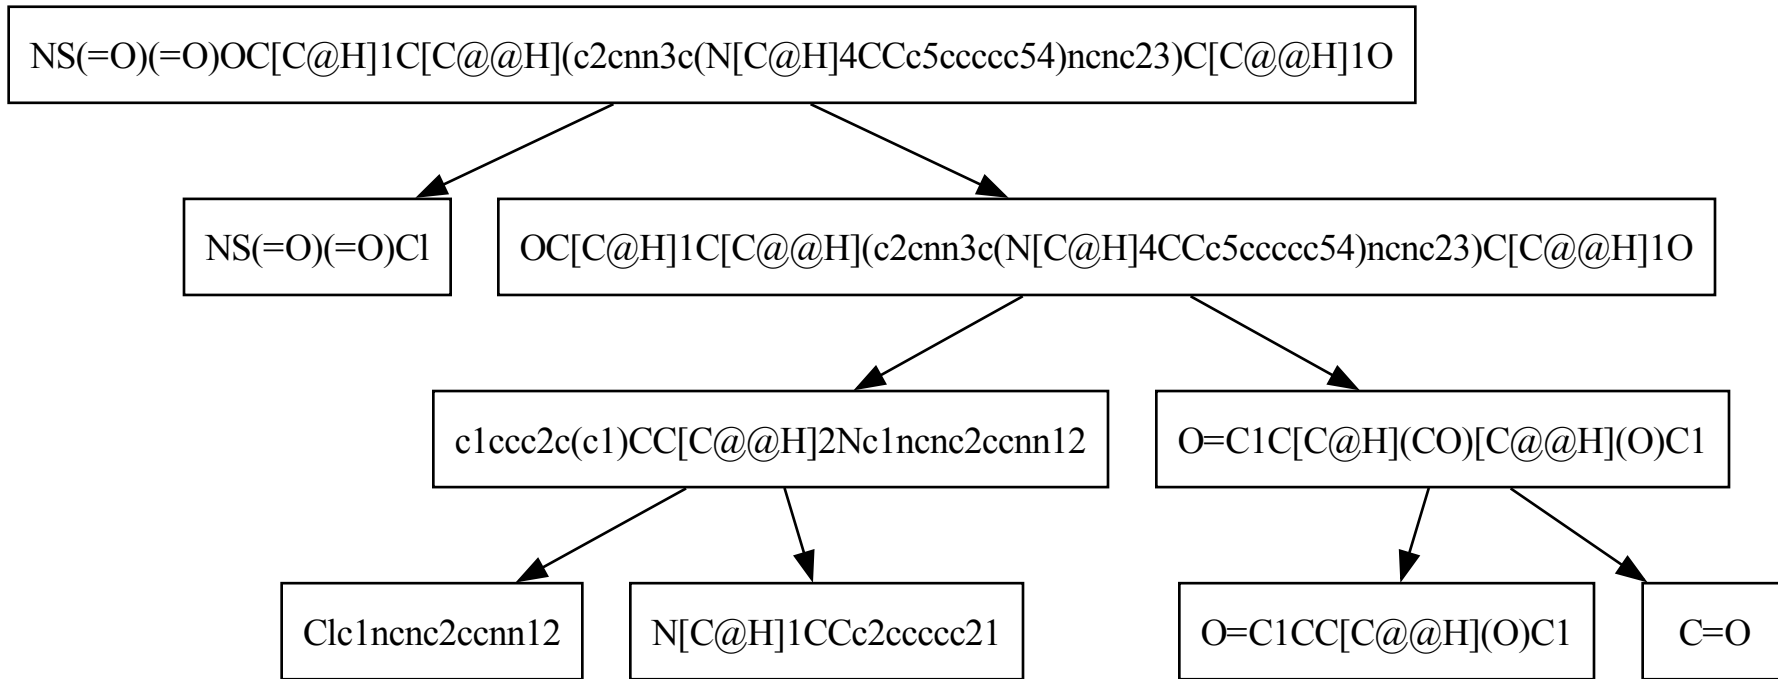

Supplement: supplementary_material [file mol_105_route_optimal.pdf › materials9084/retro190_solutions/mol_105_route_optimal.pdf]

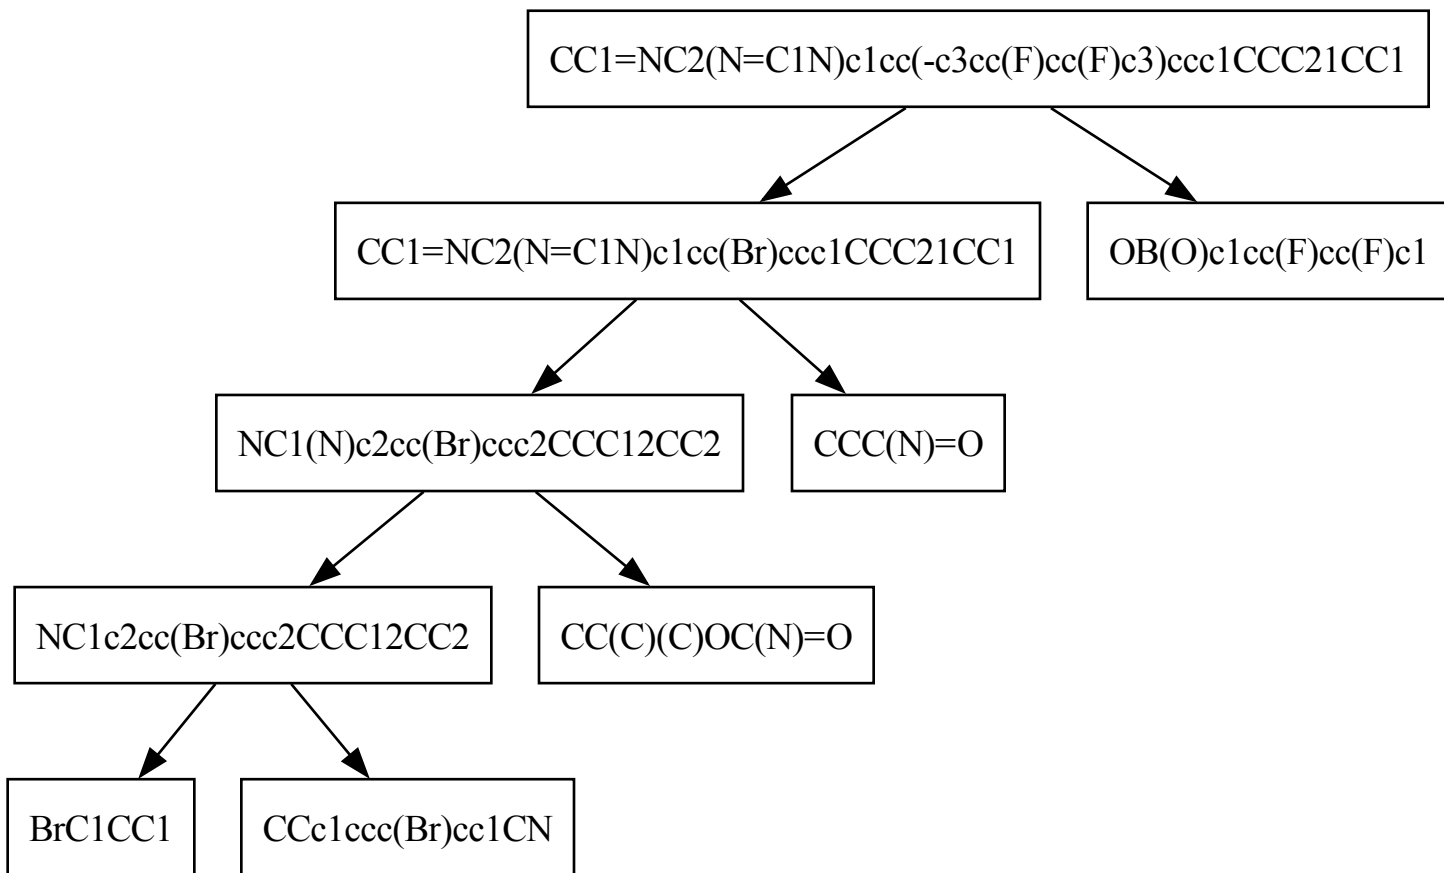

Supplement: supplementary_material [file mol_107_route_optimal.pdf › materials9084/retro190_solutions/mol_107_route_optimal.pdf]

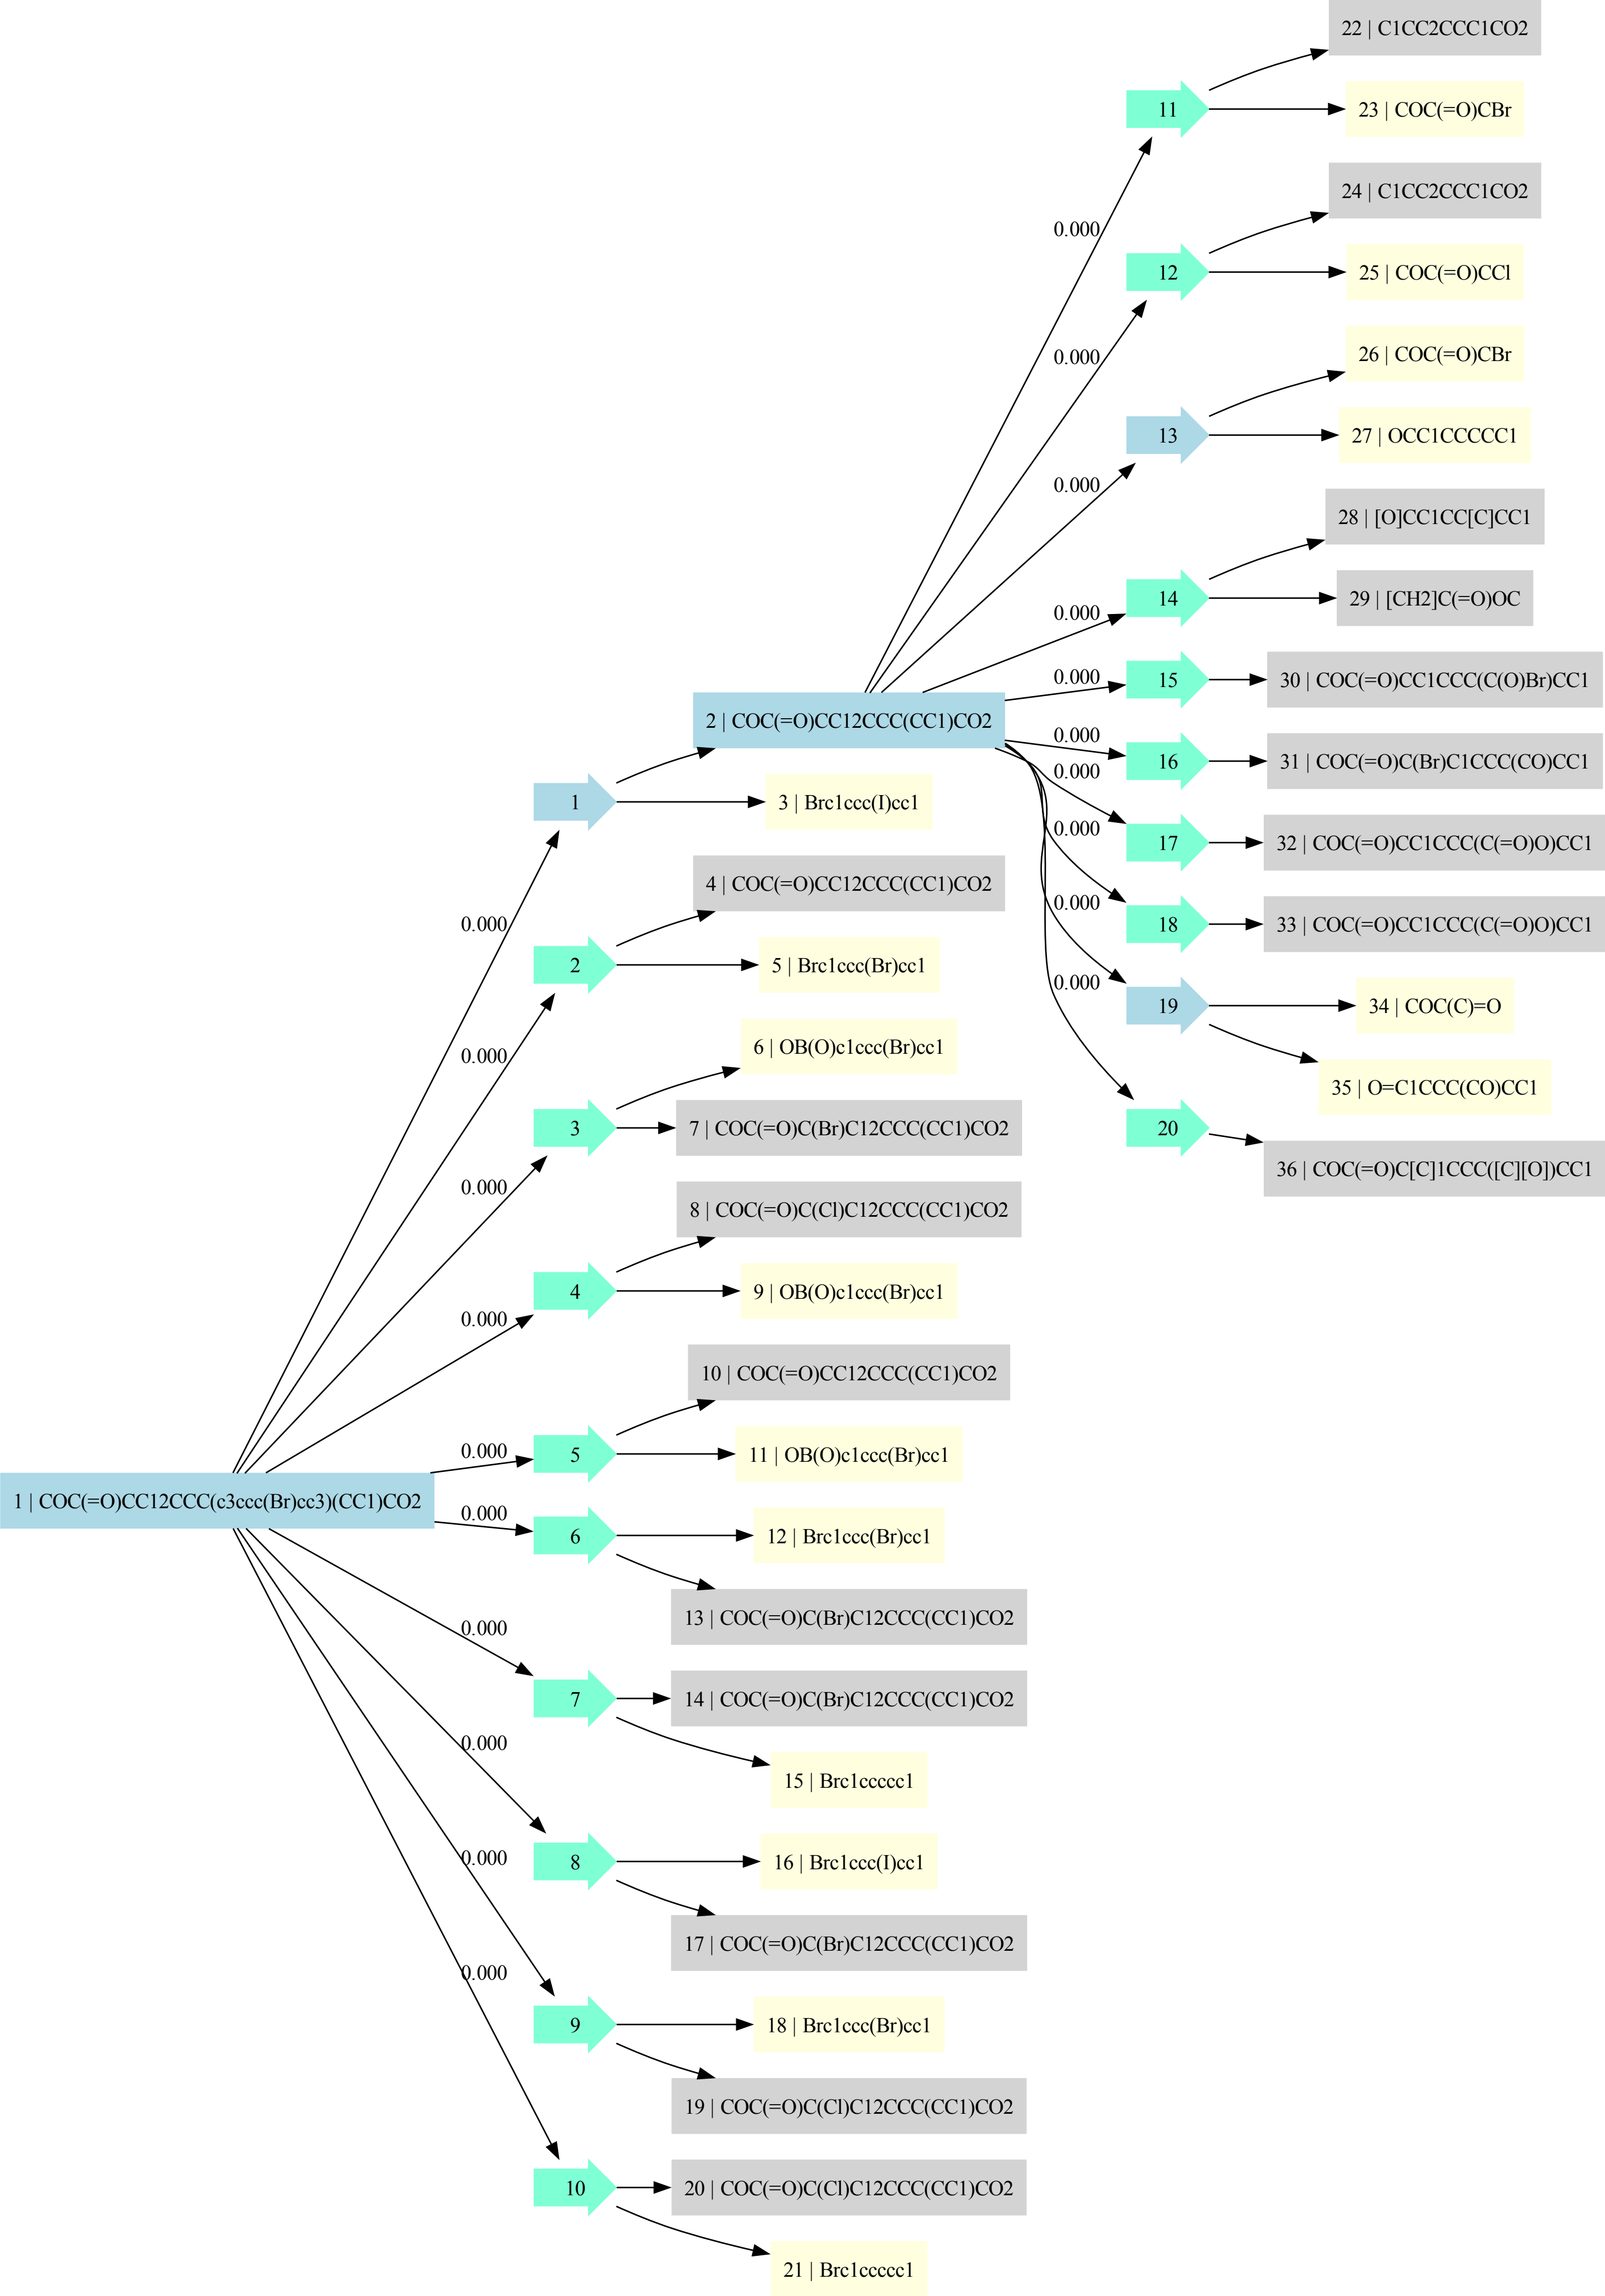

Supplement: supplementary_material [file mol_108_search_tree.pdf › materials9084/retro190_solutions/mol_108_search_tree.pdf]

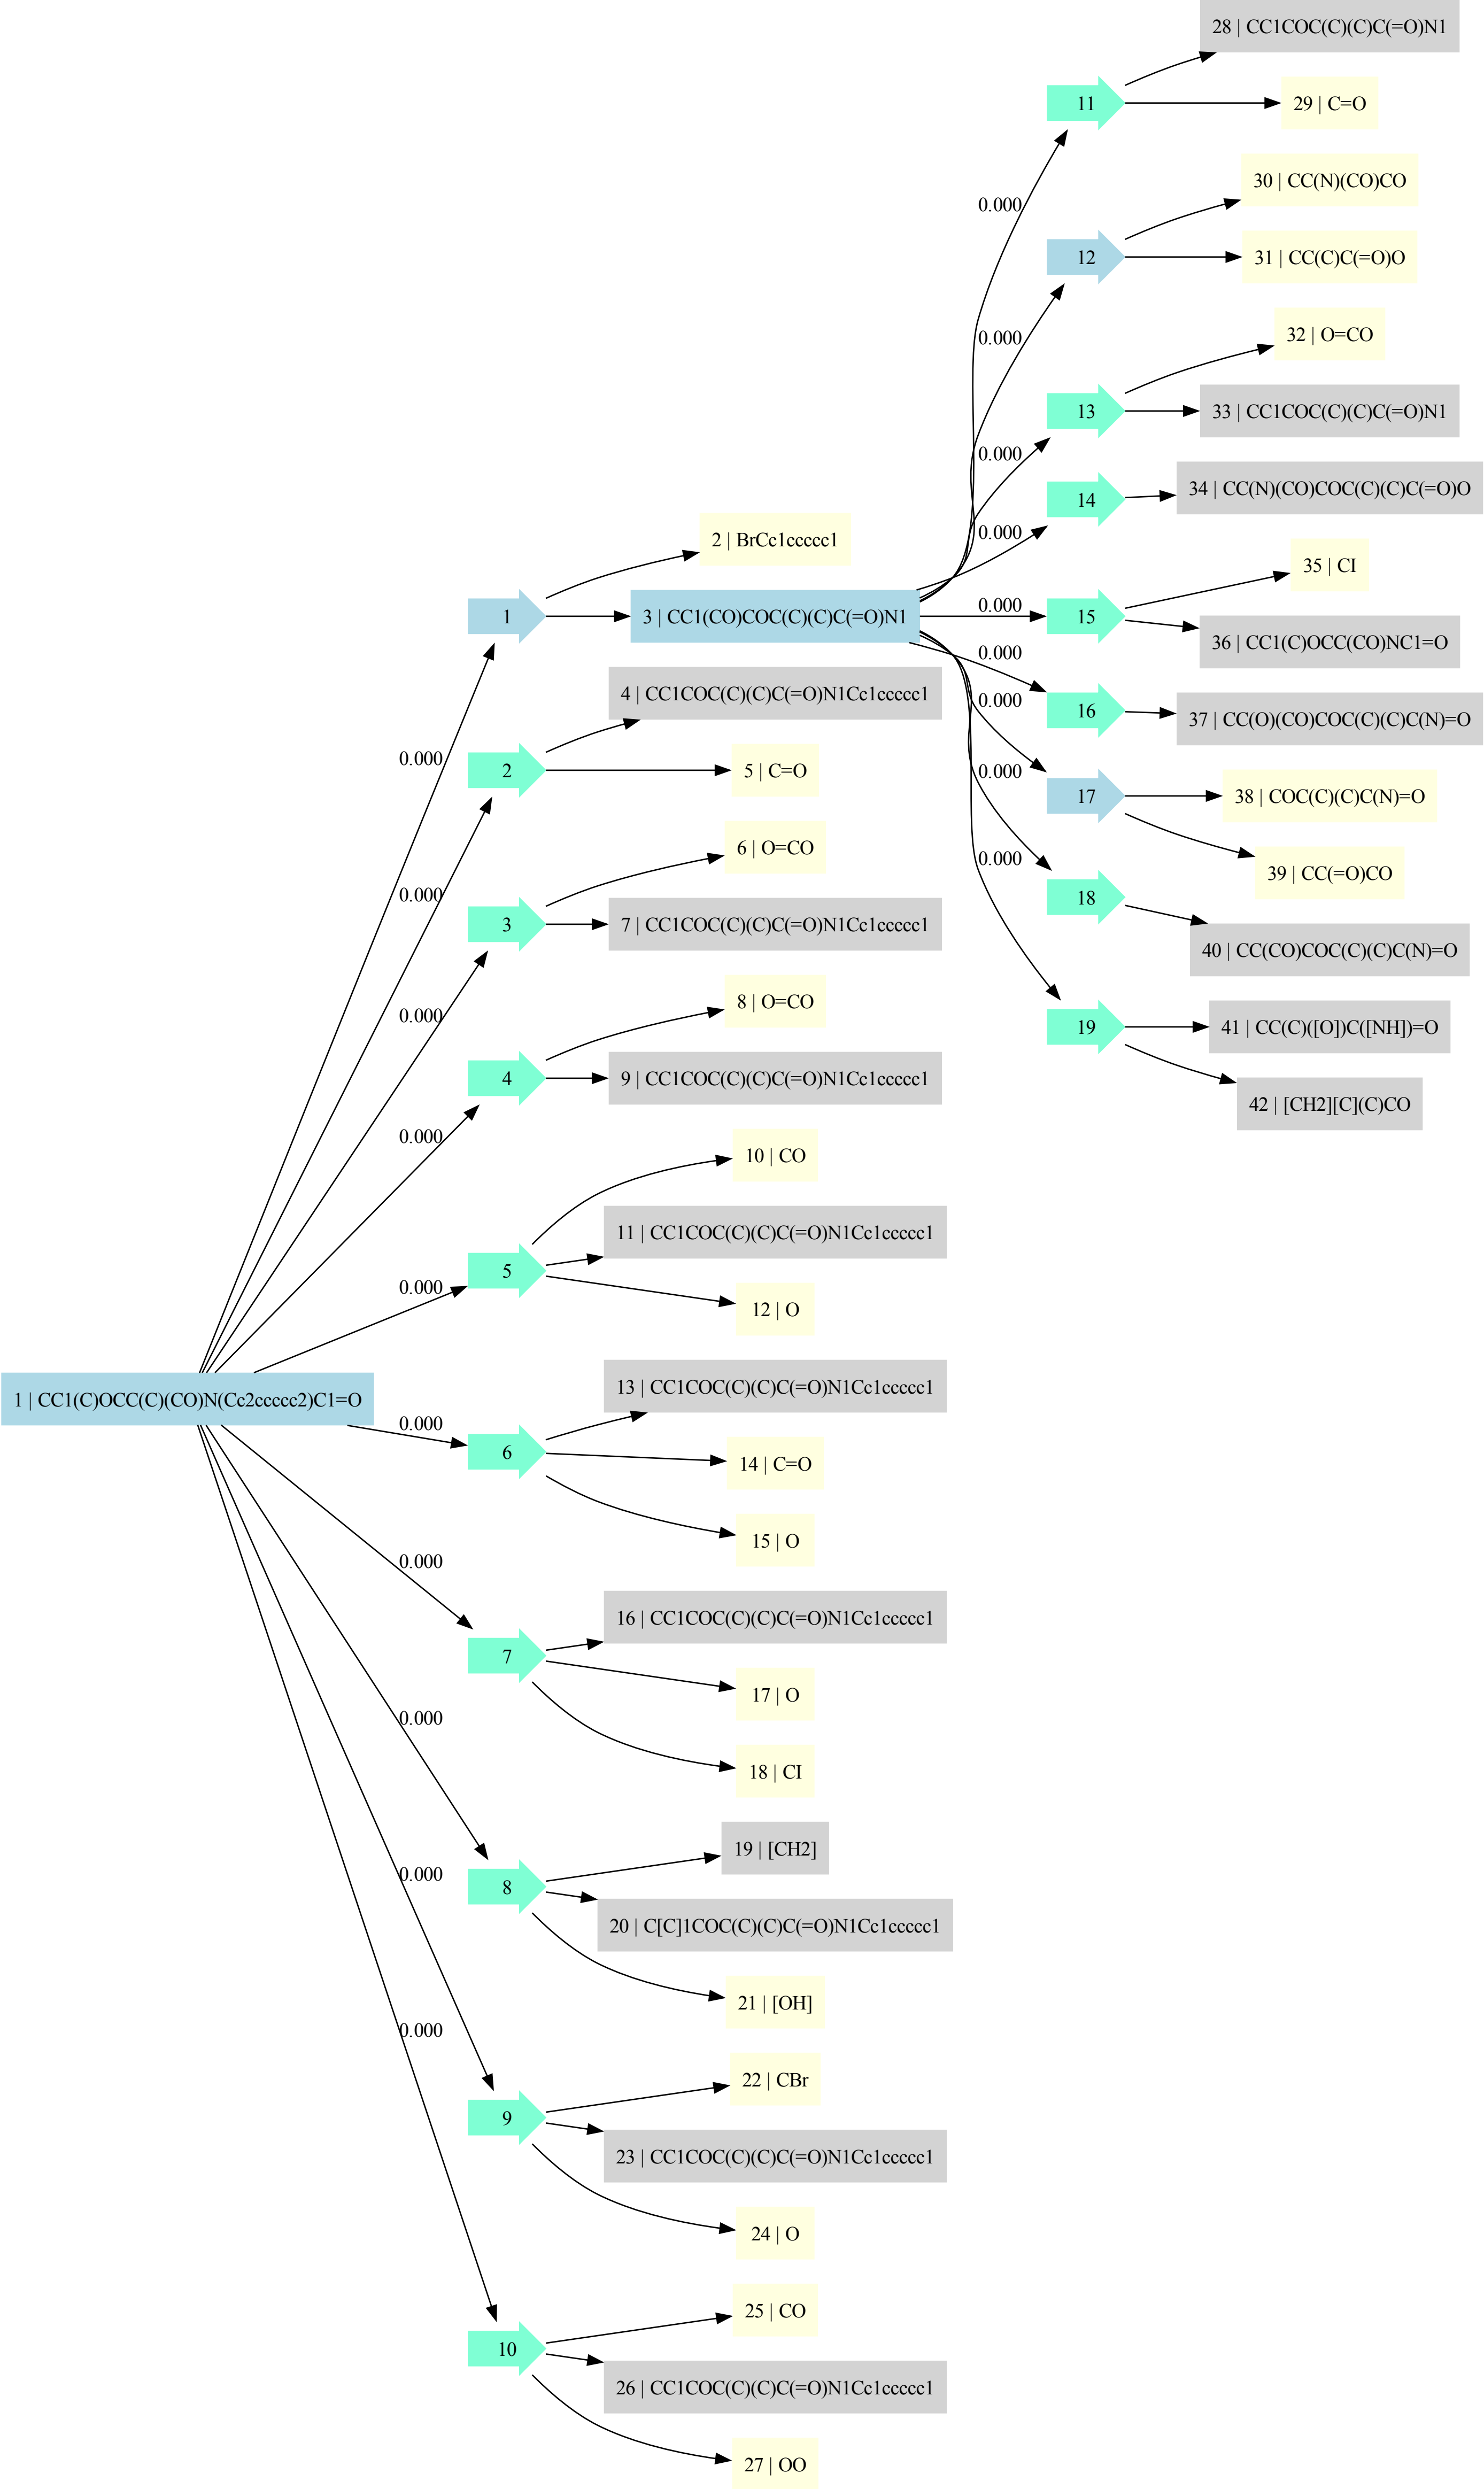

Supplement: supplementary_material [file mol_109_search_tree.pdf › materials9084/retro190_solutions/mol_109_search_tree.pdf]

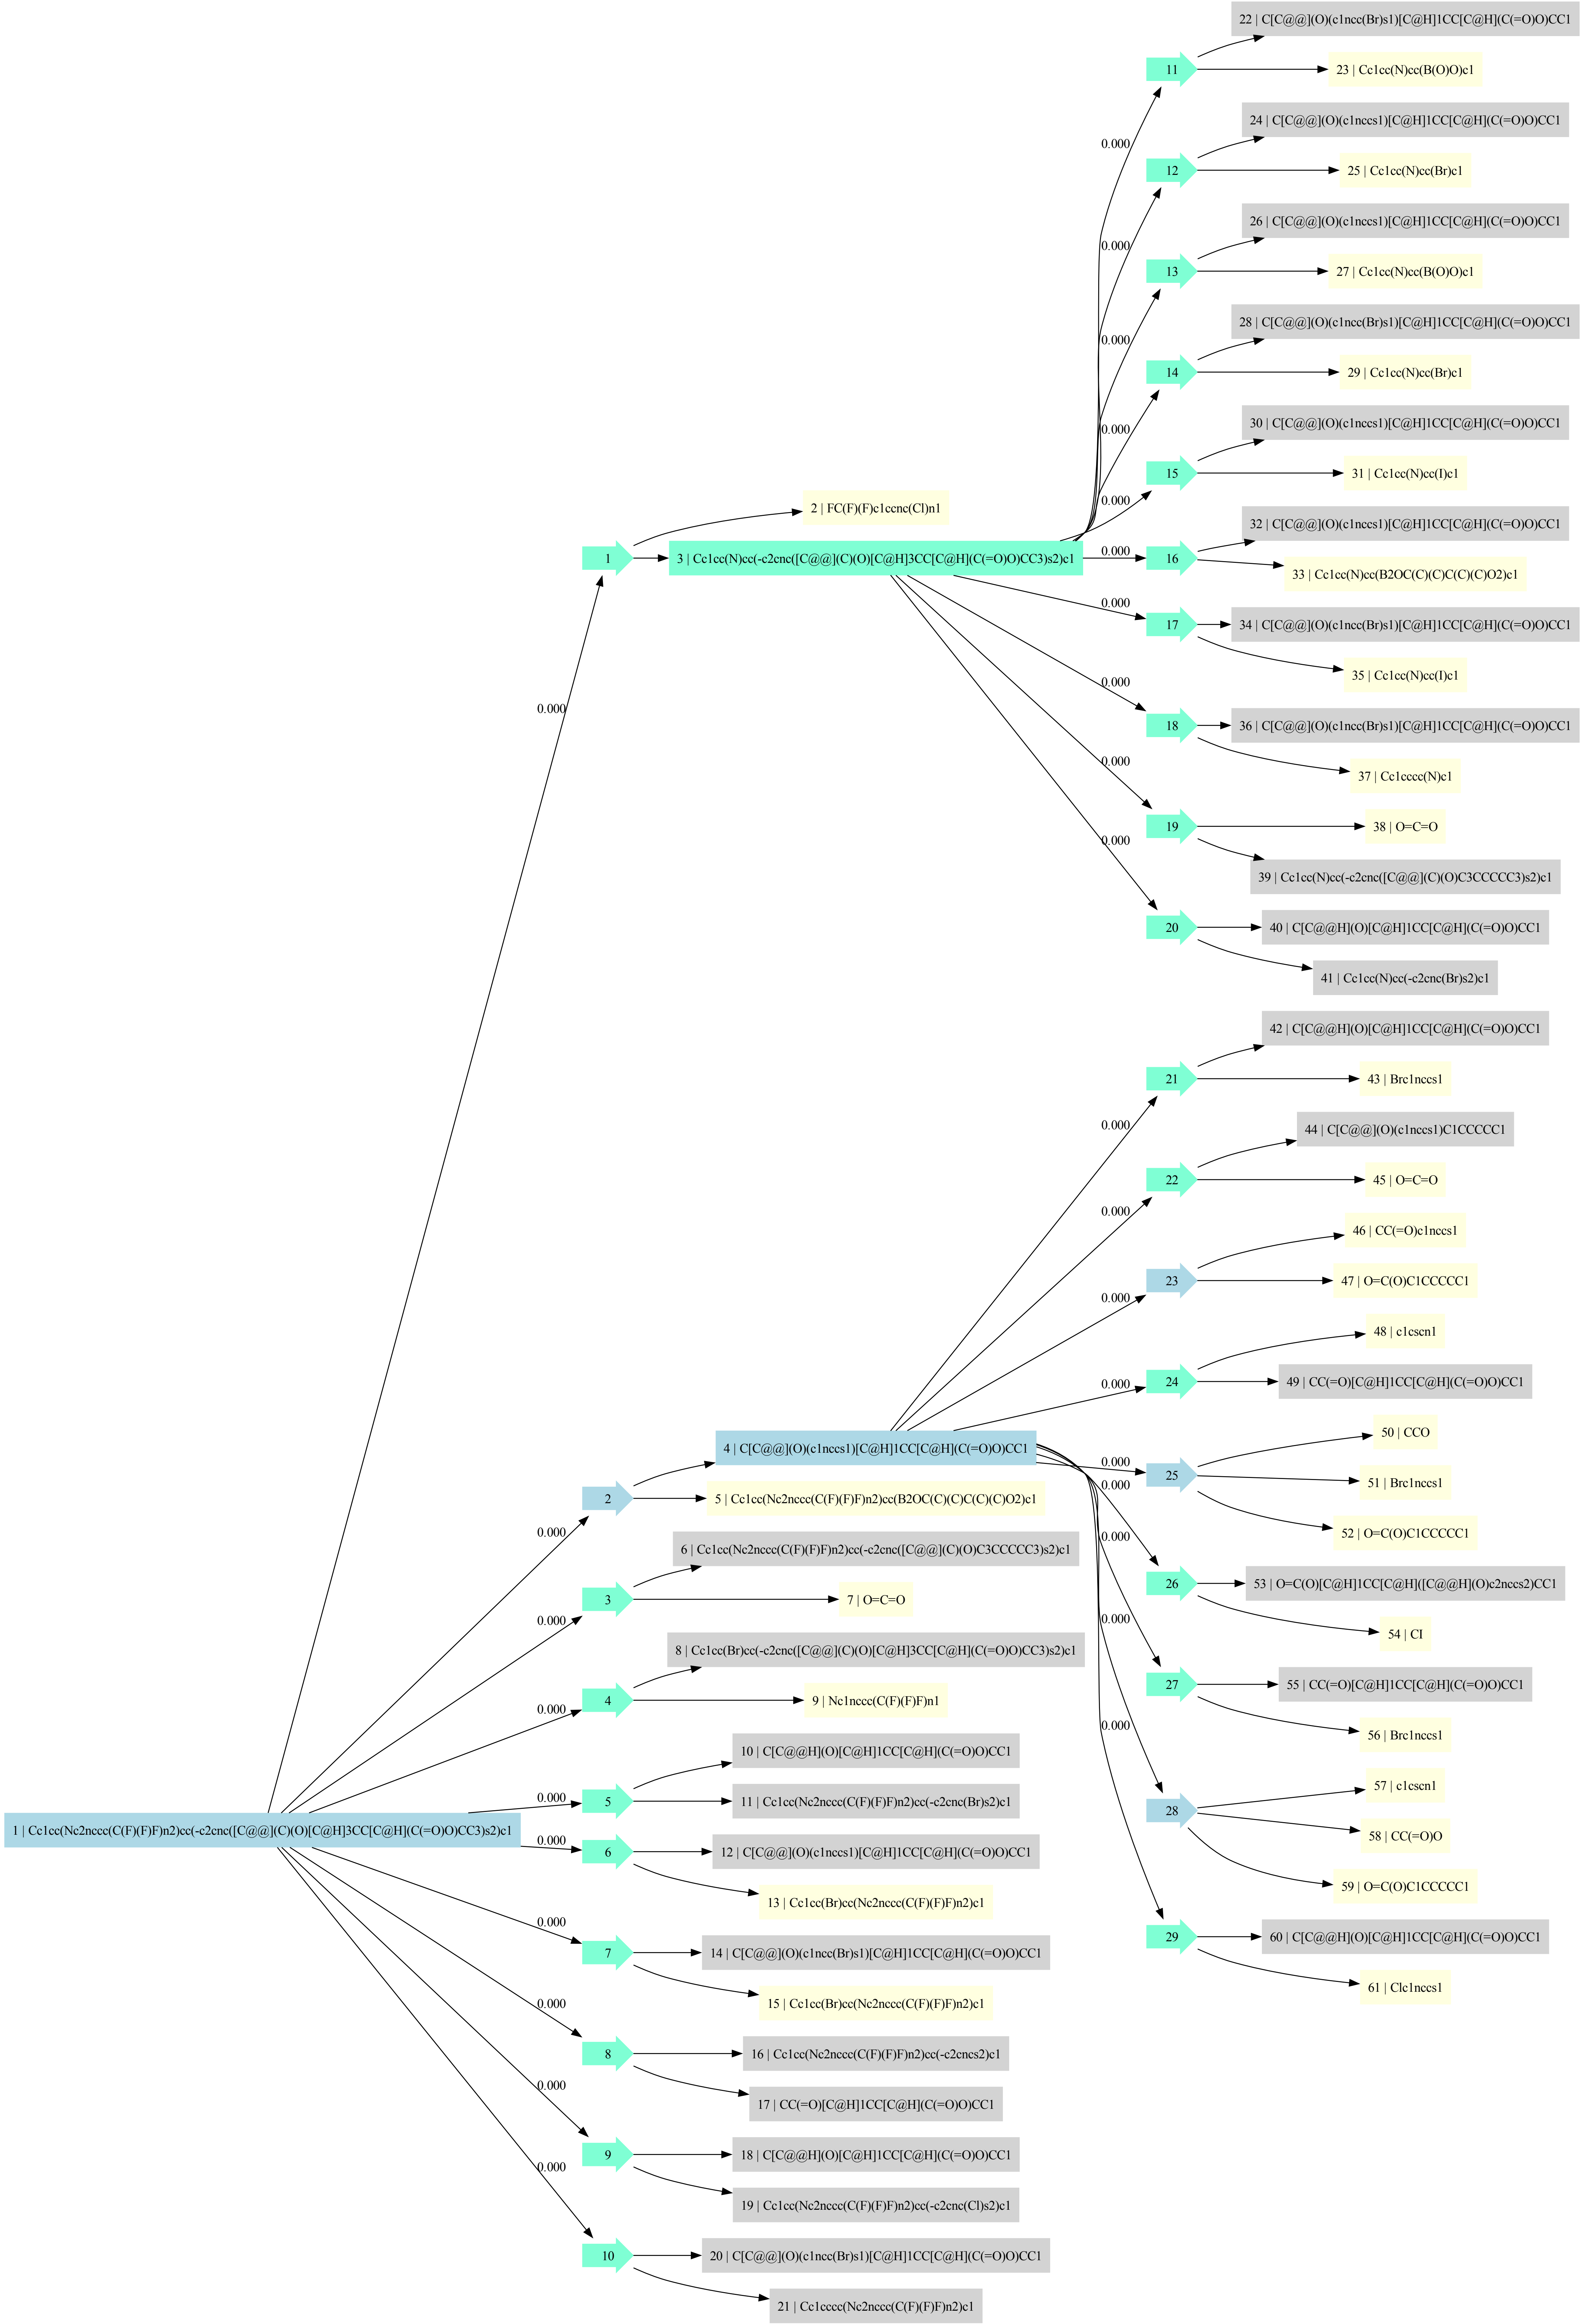

Supplement: supplementary_material [file mol_10_search_tree.pdf › materials9084/retro190_solutions/mol_10_search_tree.pdf]

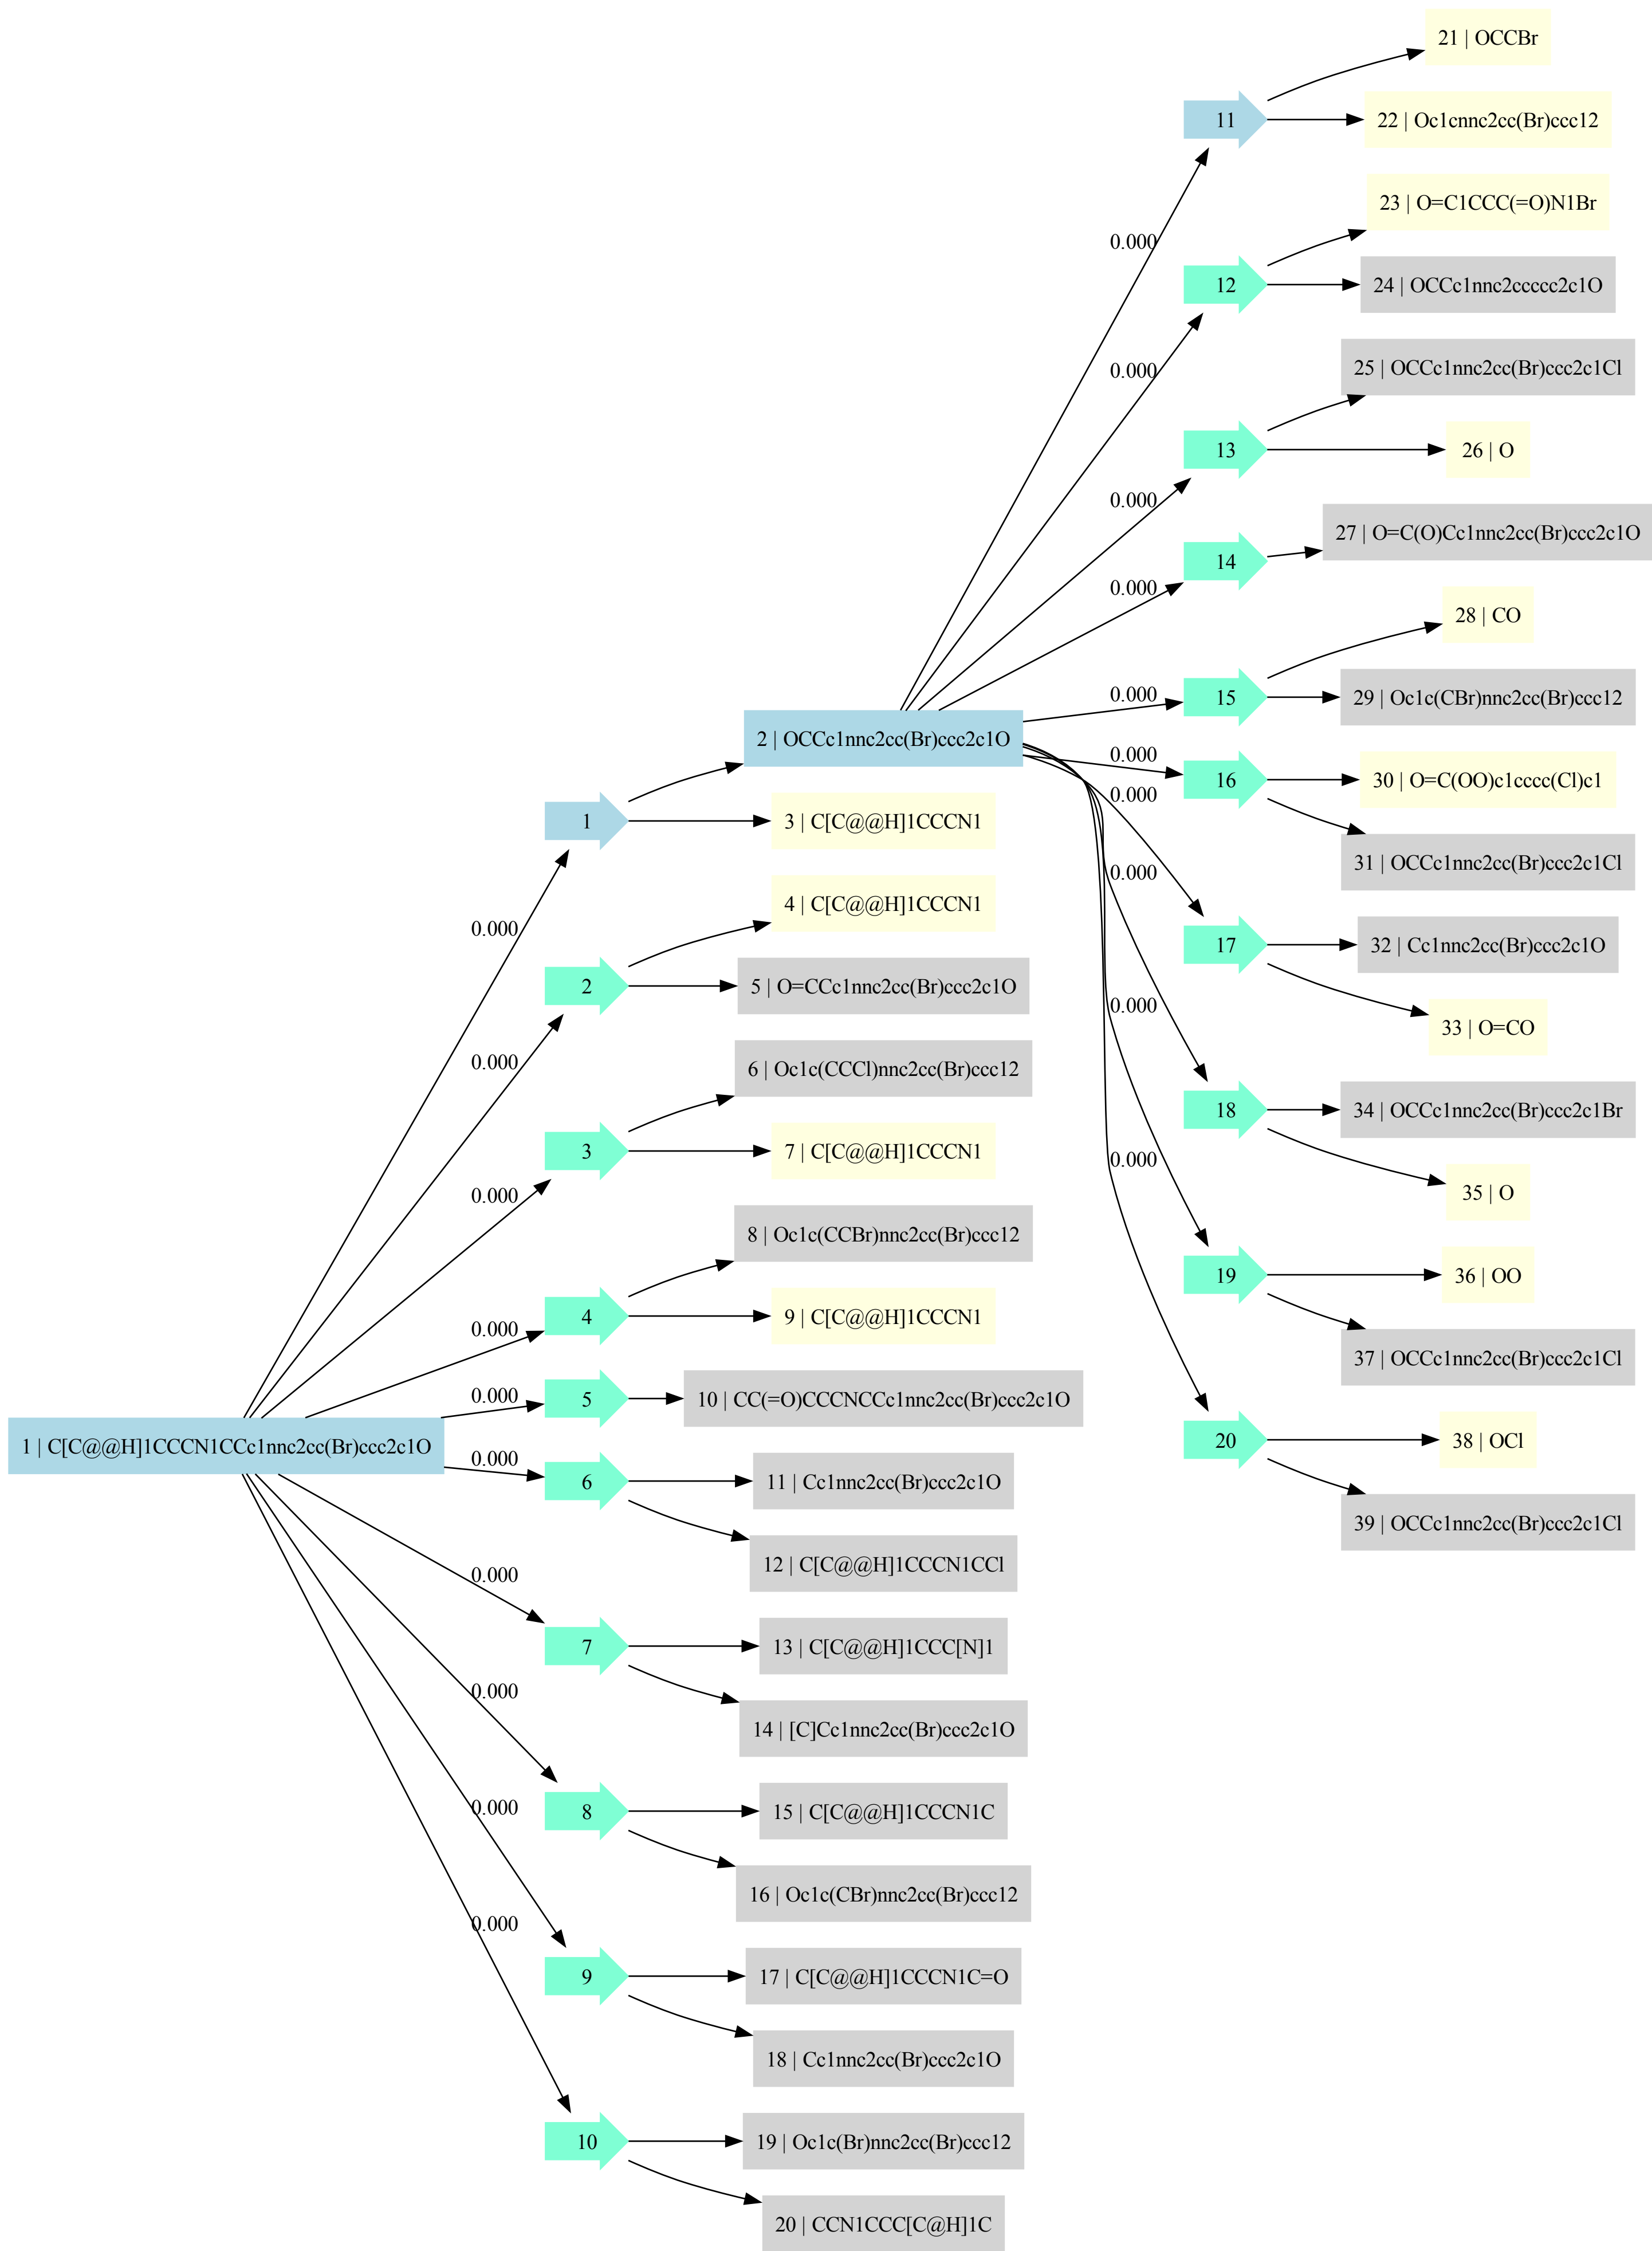

Supplement: supplementary_material [file mol_110_search_tree.pdf › materials9084/retro190_solutions/mol_110_search_tree.pdf]

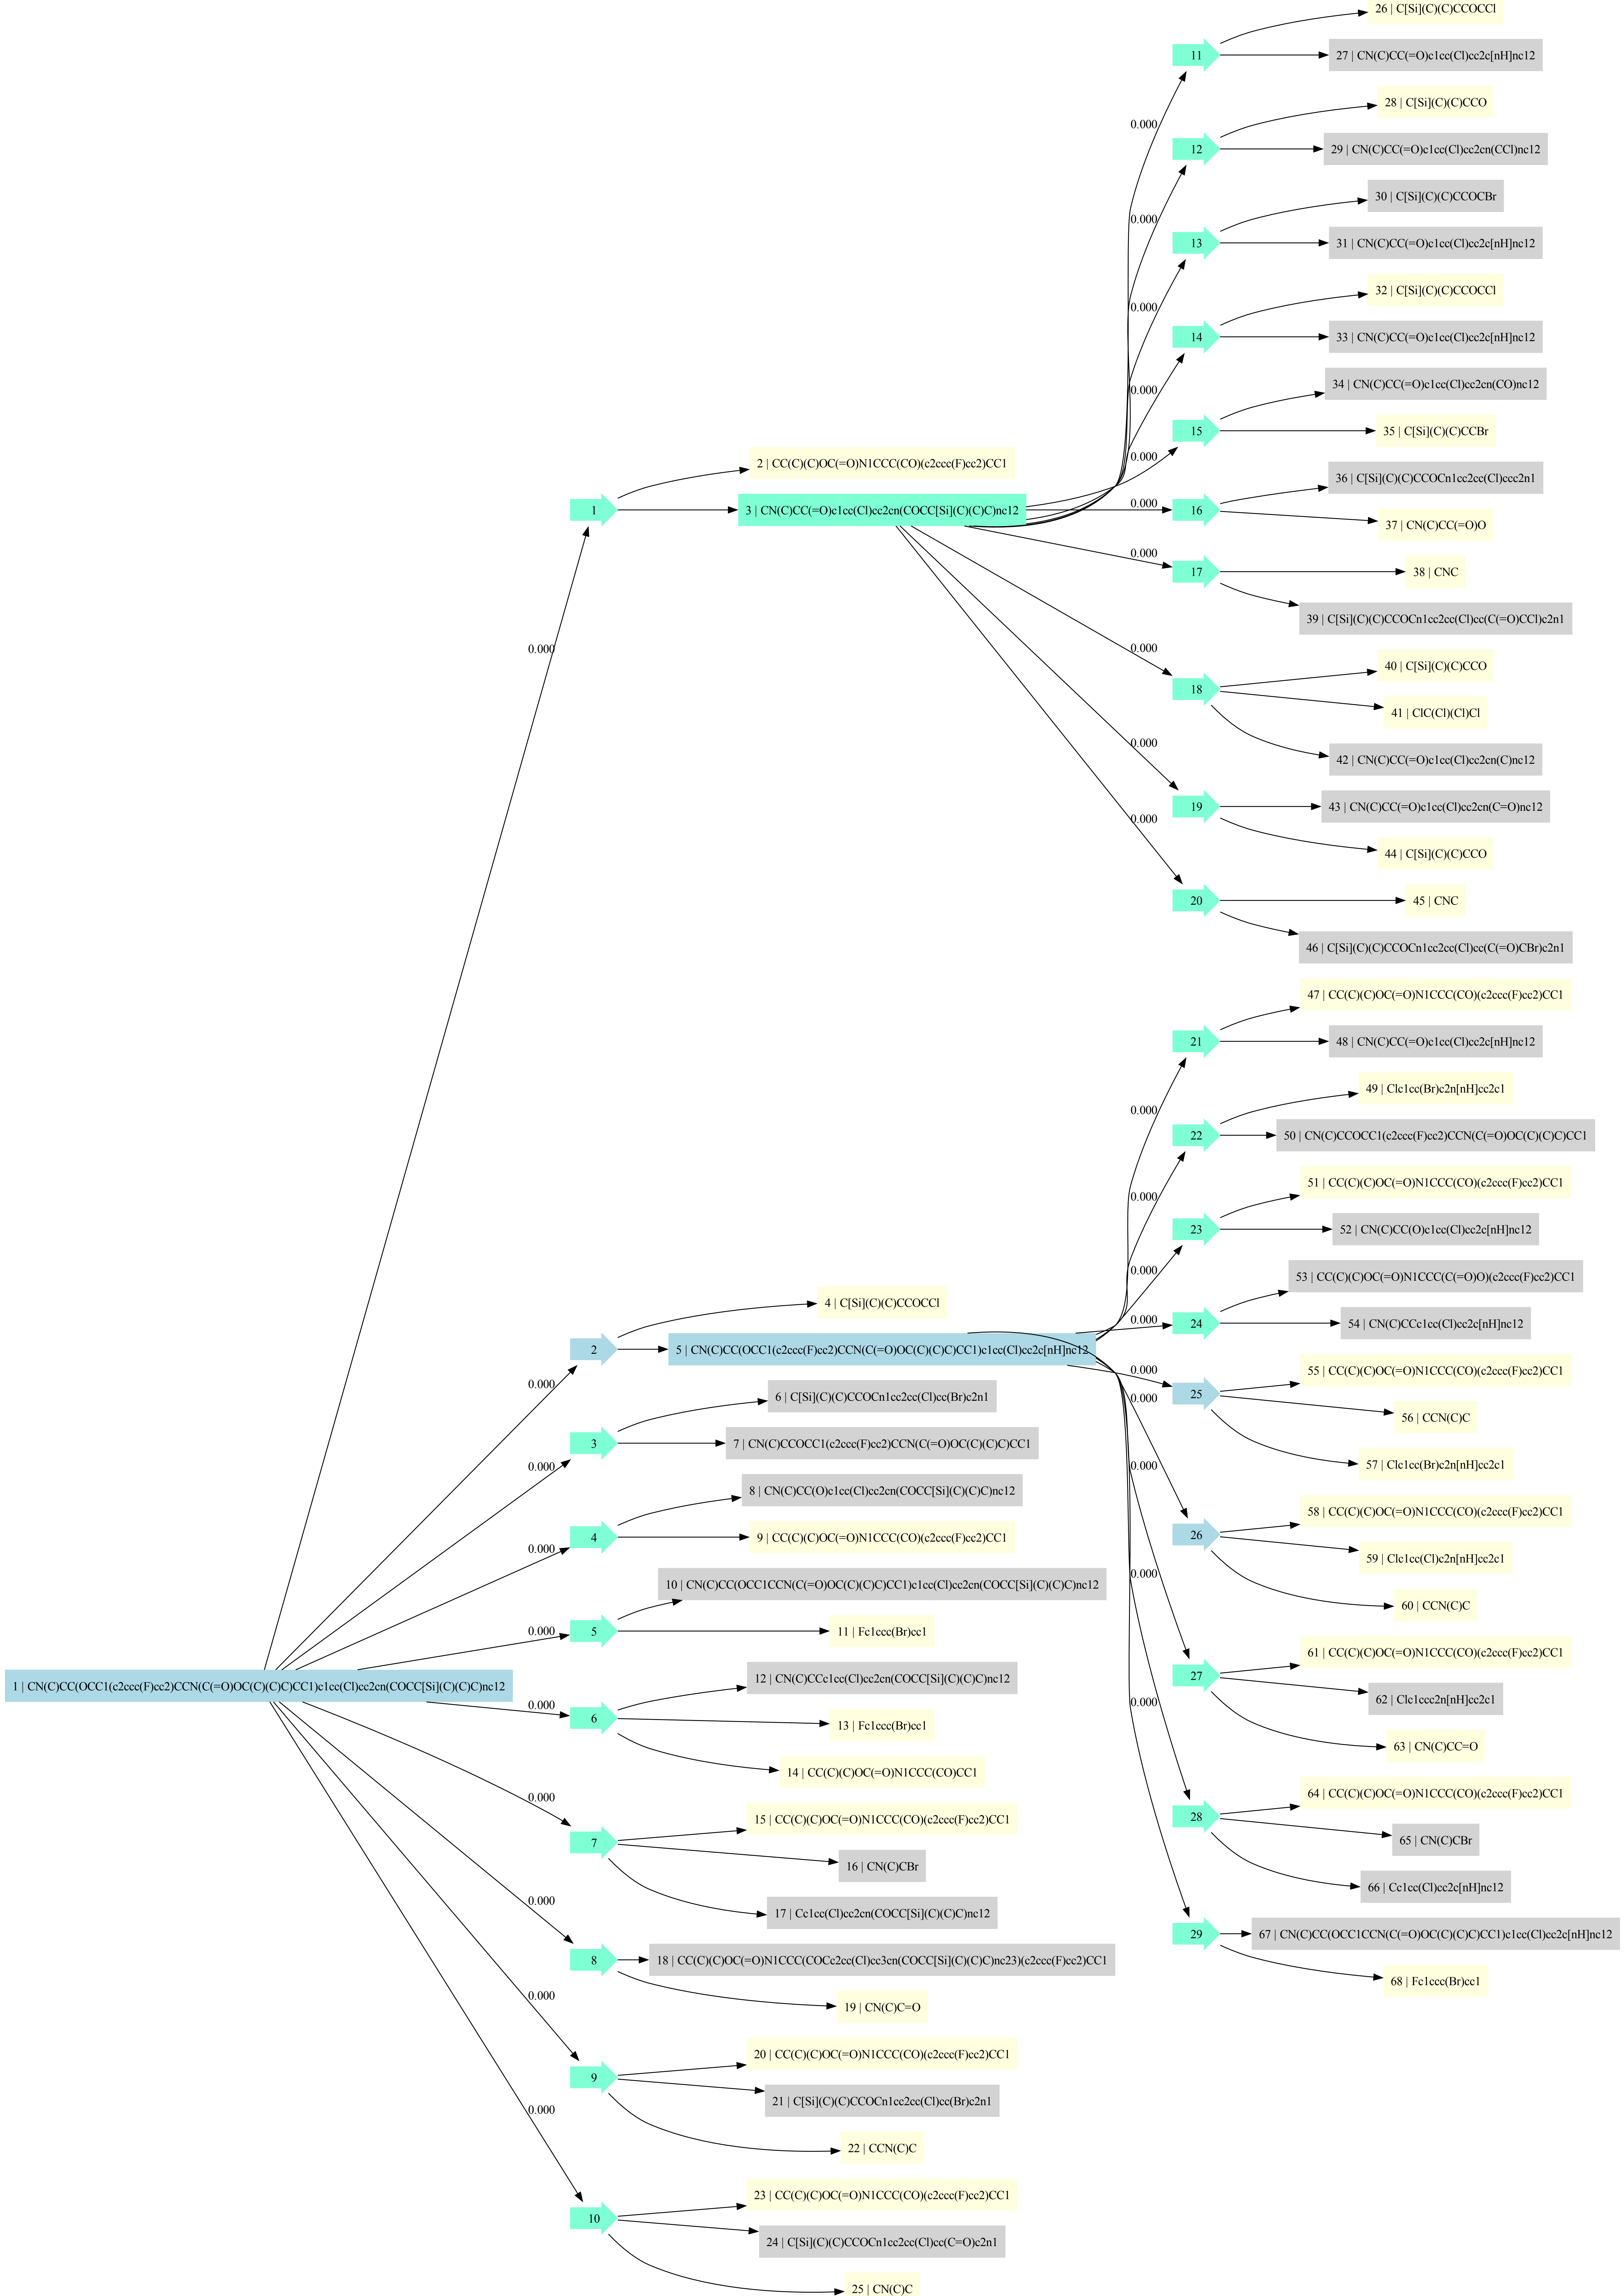

Supplement: supplementary_material [file mol_111_search_tree.pdf › materials9084/retro190_solutions/mol_111_search_tree.pdf]

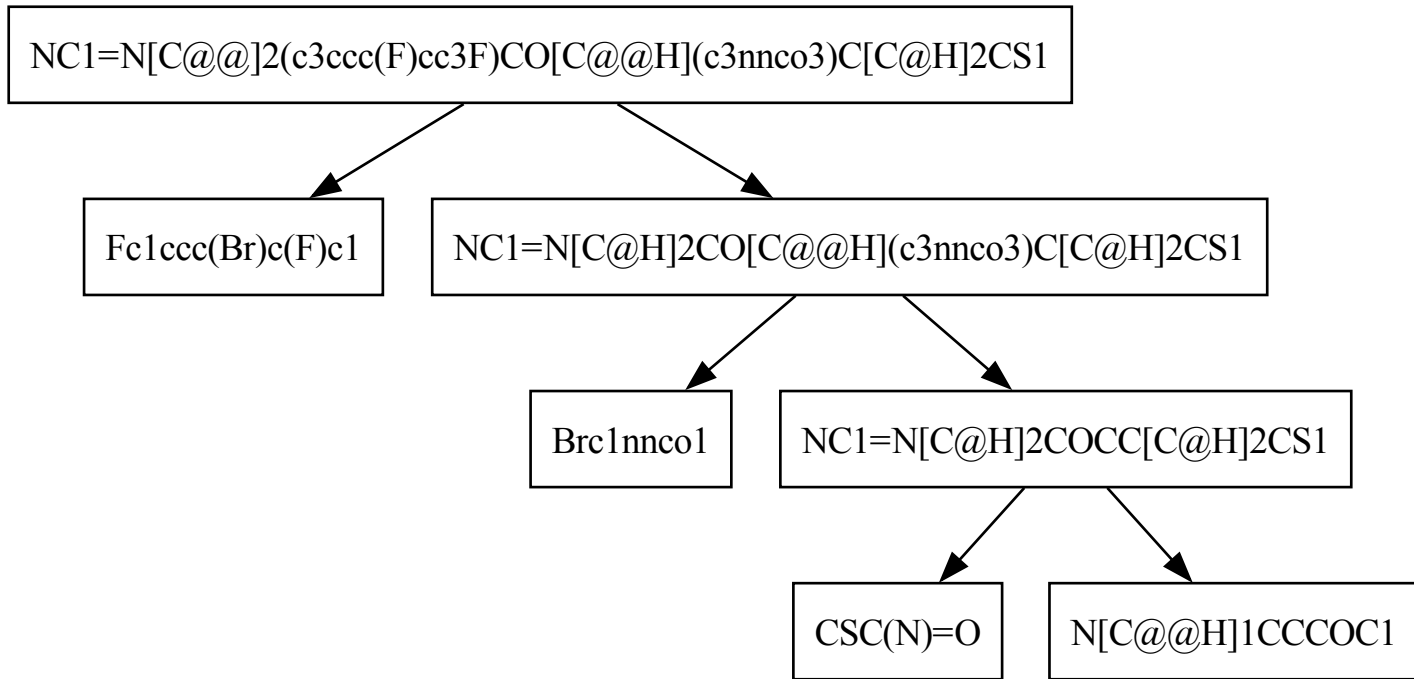

Supplement: supplementary_material [file mol_112_route_optimal.pdf › materials9084/retro190_solutions/mol_112_route_optimal.pdf]

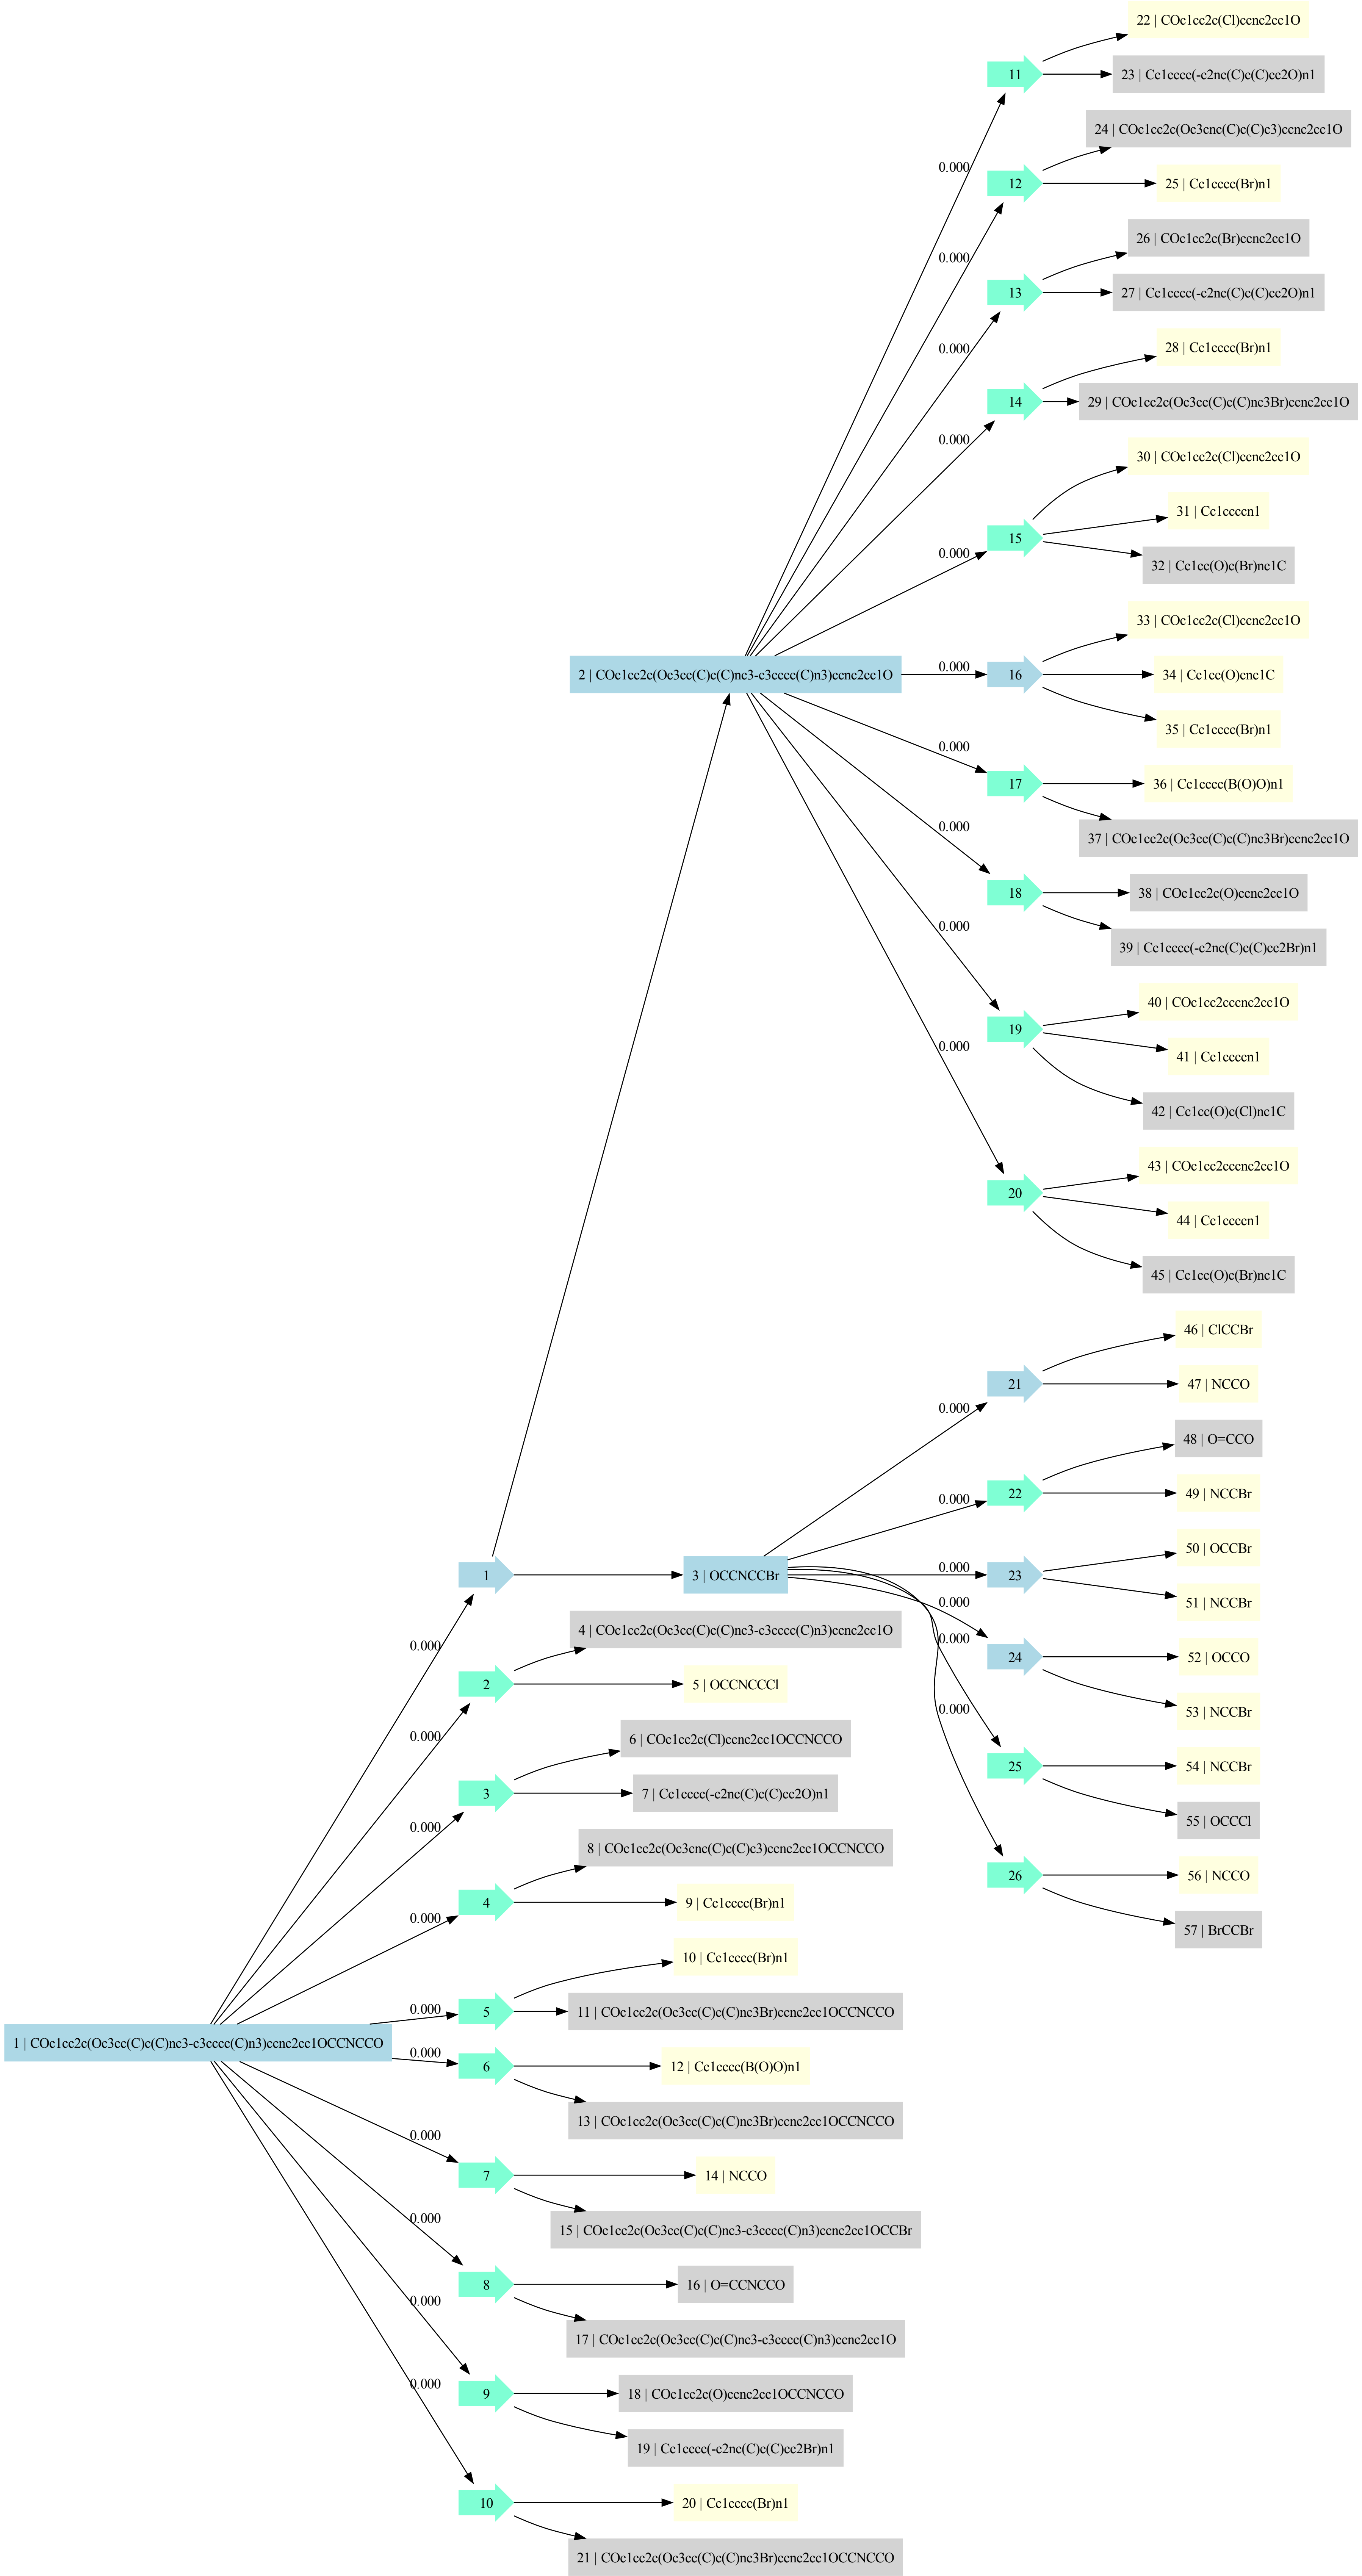

Supplement: supplementary_material [file mol_113_search_tree.pdf › materials9084/retro190_solutions/mol_113_search_tree.pdf]

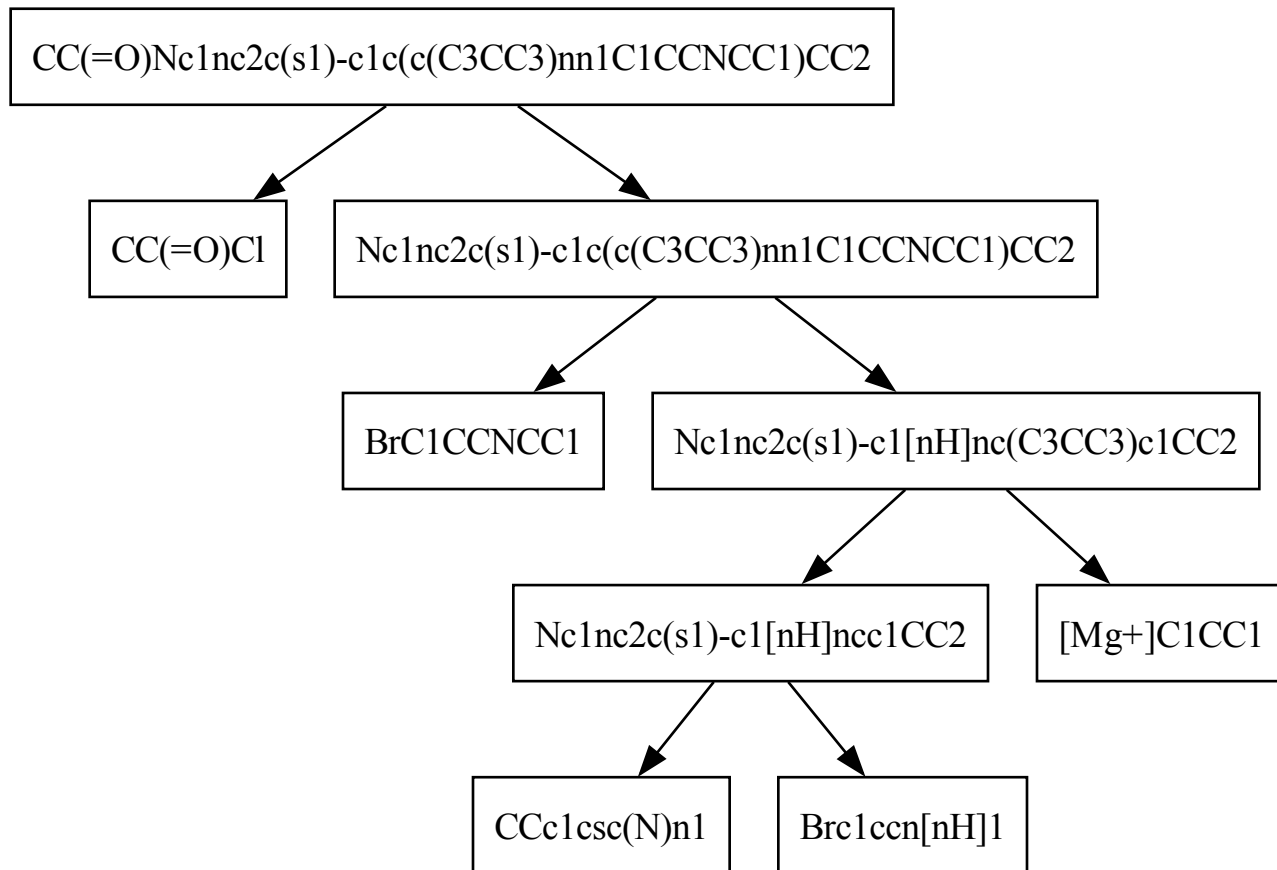

Supplement: supplementary_material [file mol_114_route_optimal.pdf › materials9084/retro190_solutions/mol_114_route_optimal.pdf]

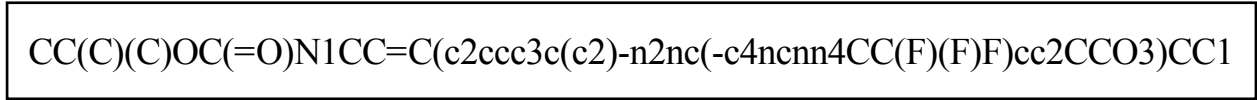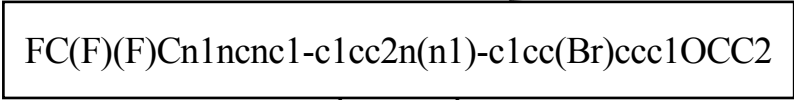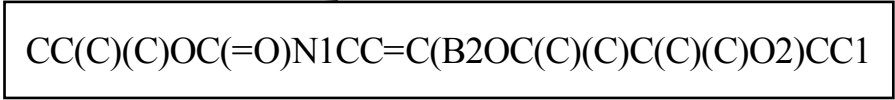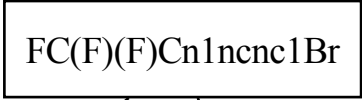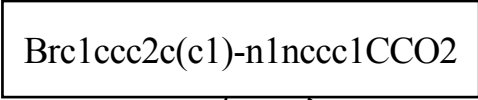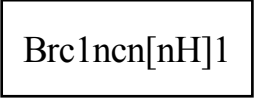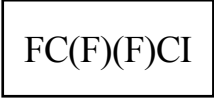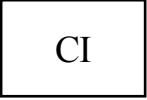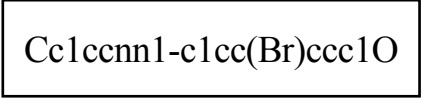

Supplement: supplementary_material [file mol_116_route_optimal.pdf › materials9084/retro190_solutions/mol_116_route_optimal.pdf]

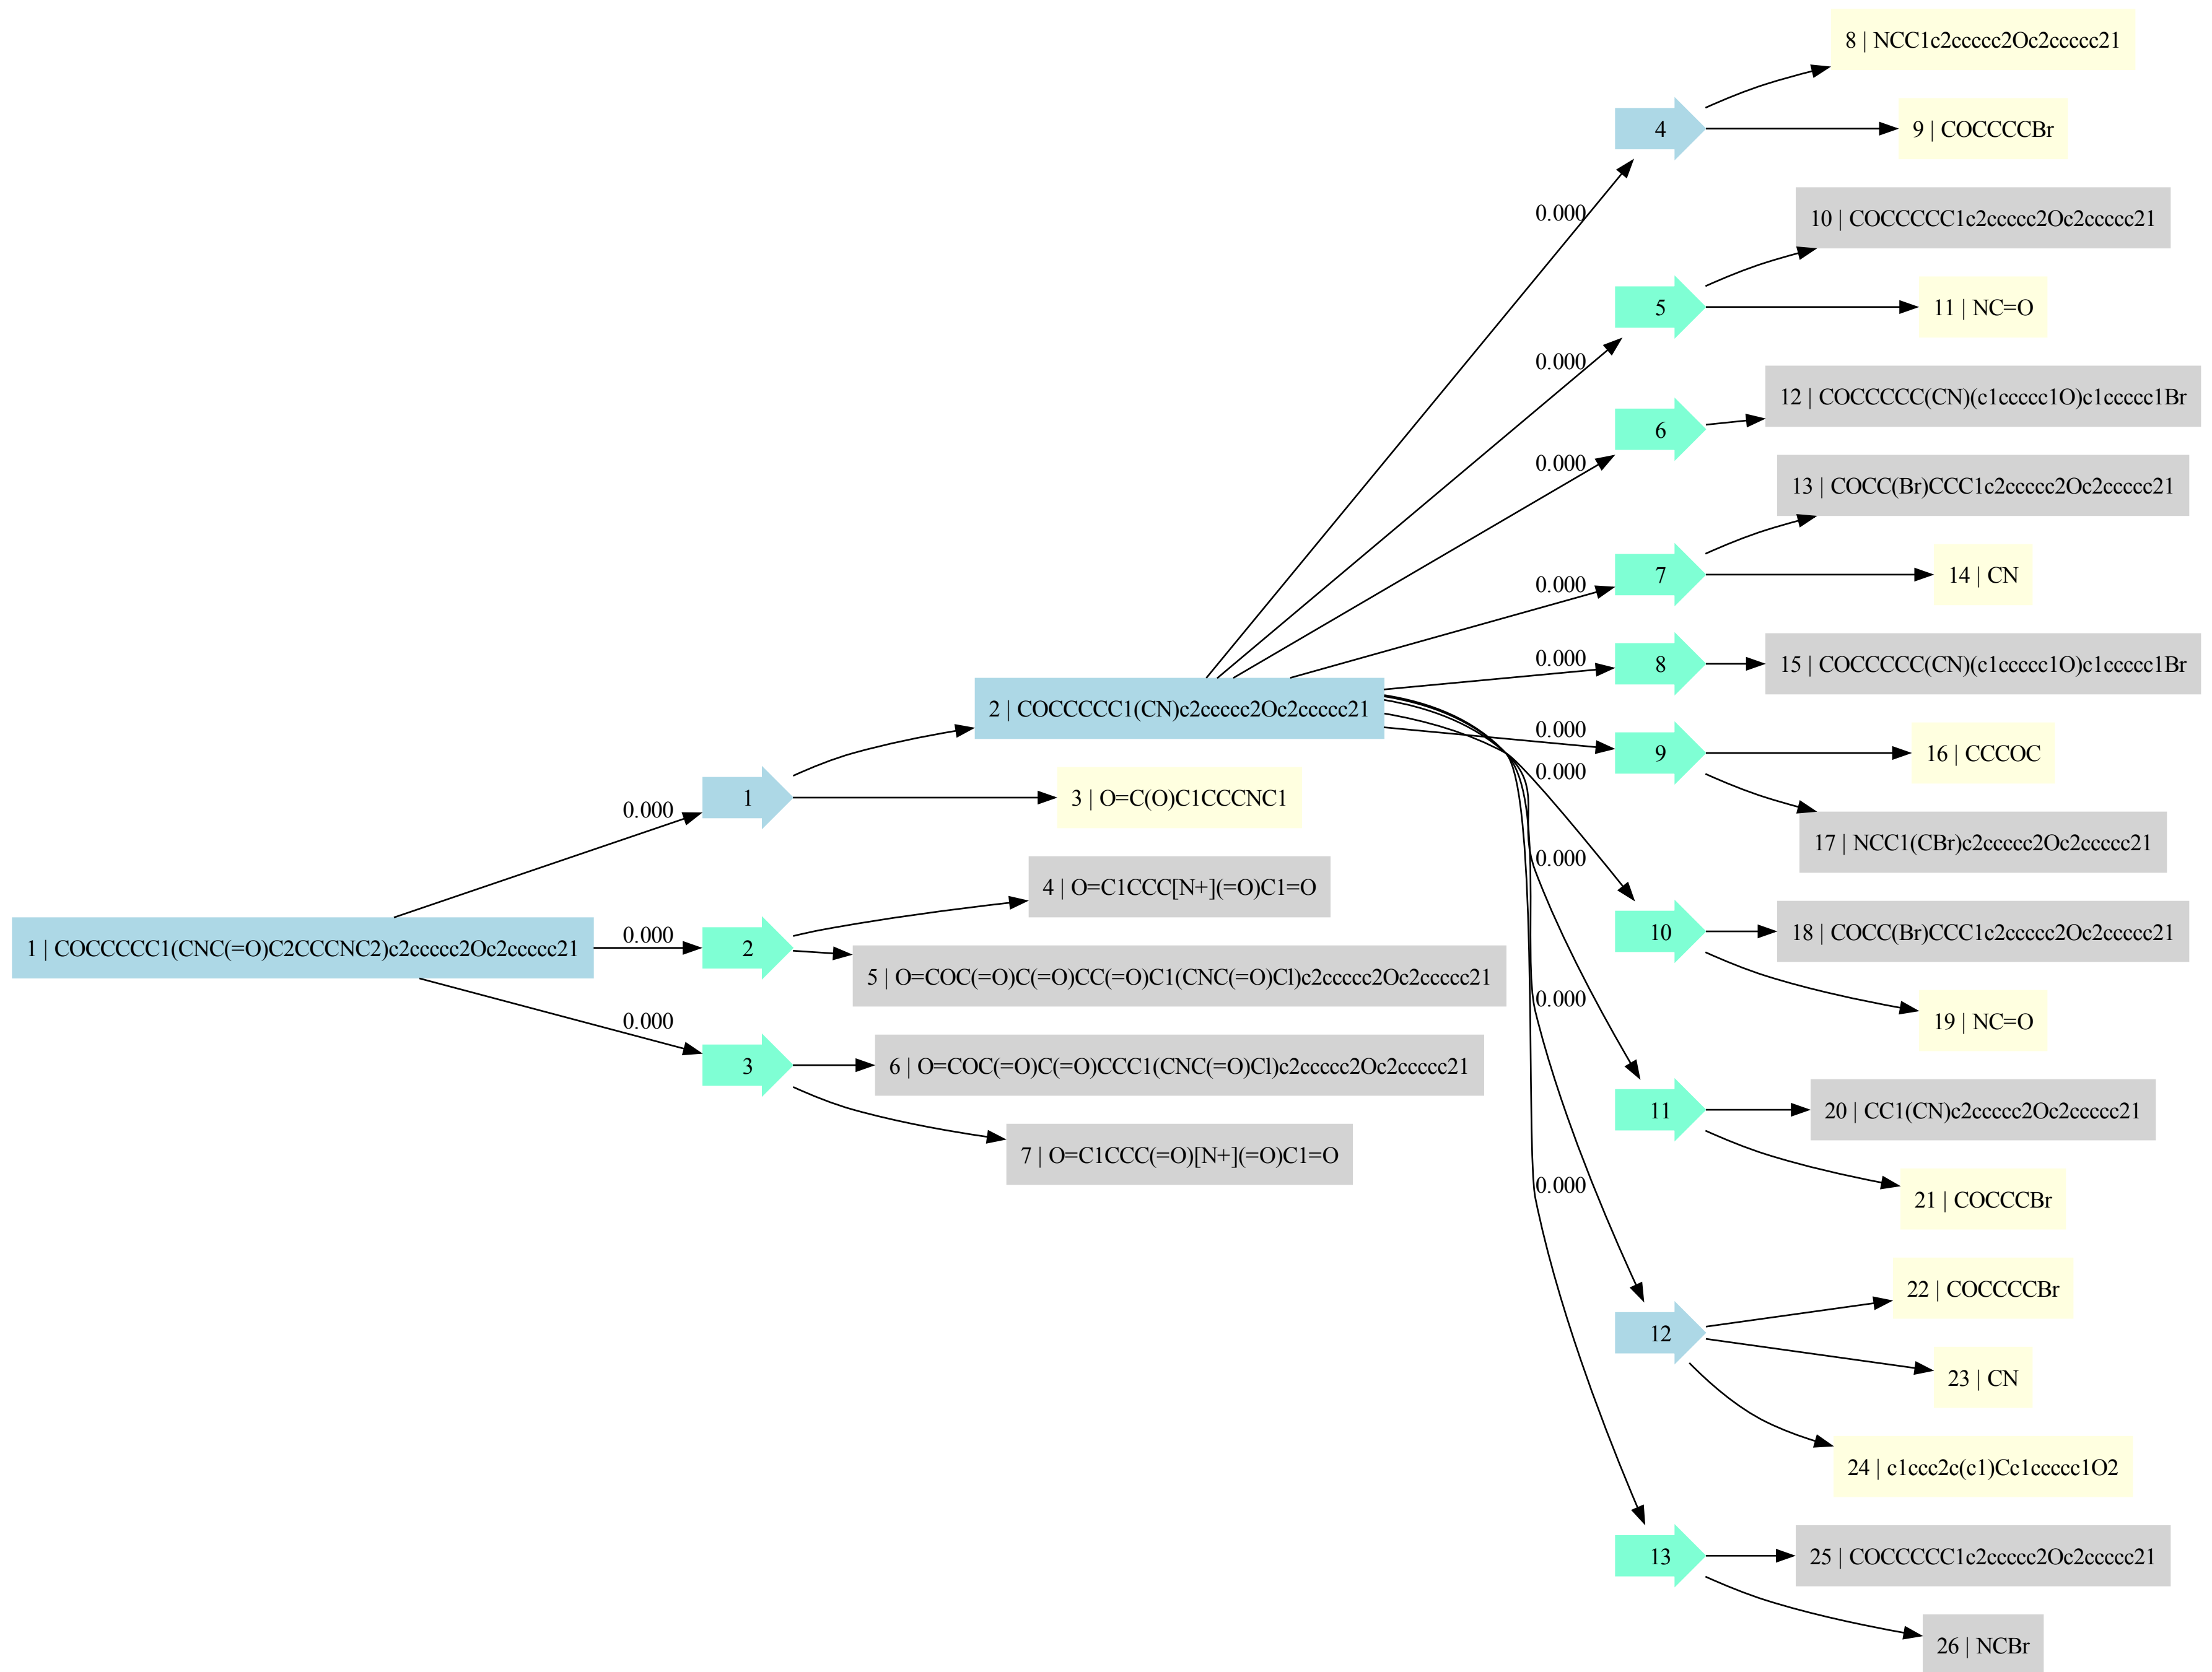

Supplement: supplementary_material [file mol_117_search_tree.pdf › materials9084/retro190_solutions/mol_117_search_tree.pdf]

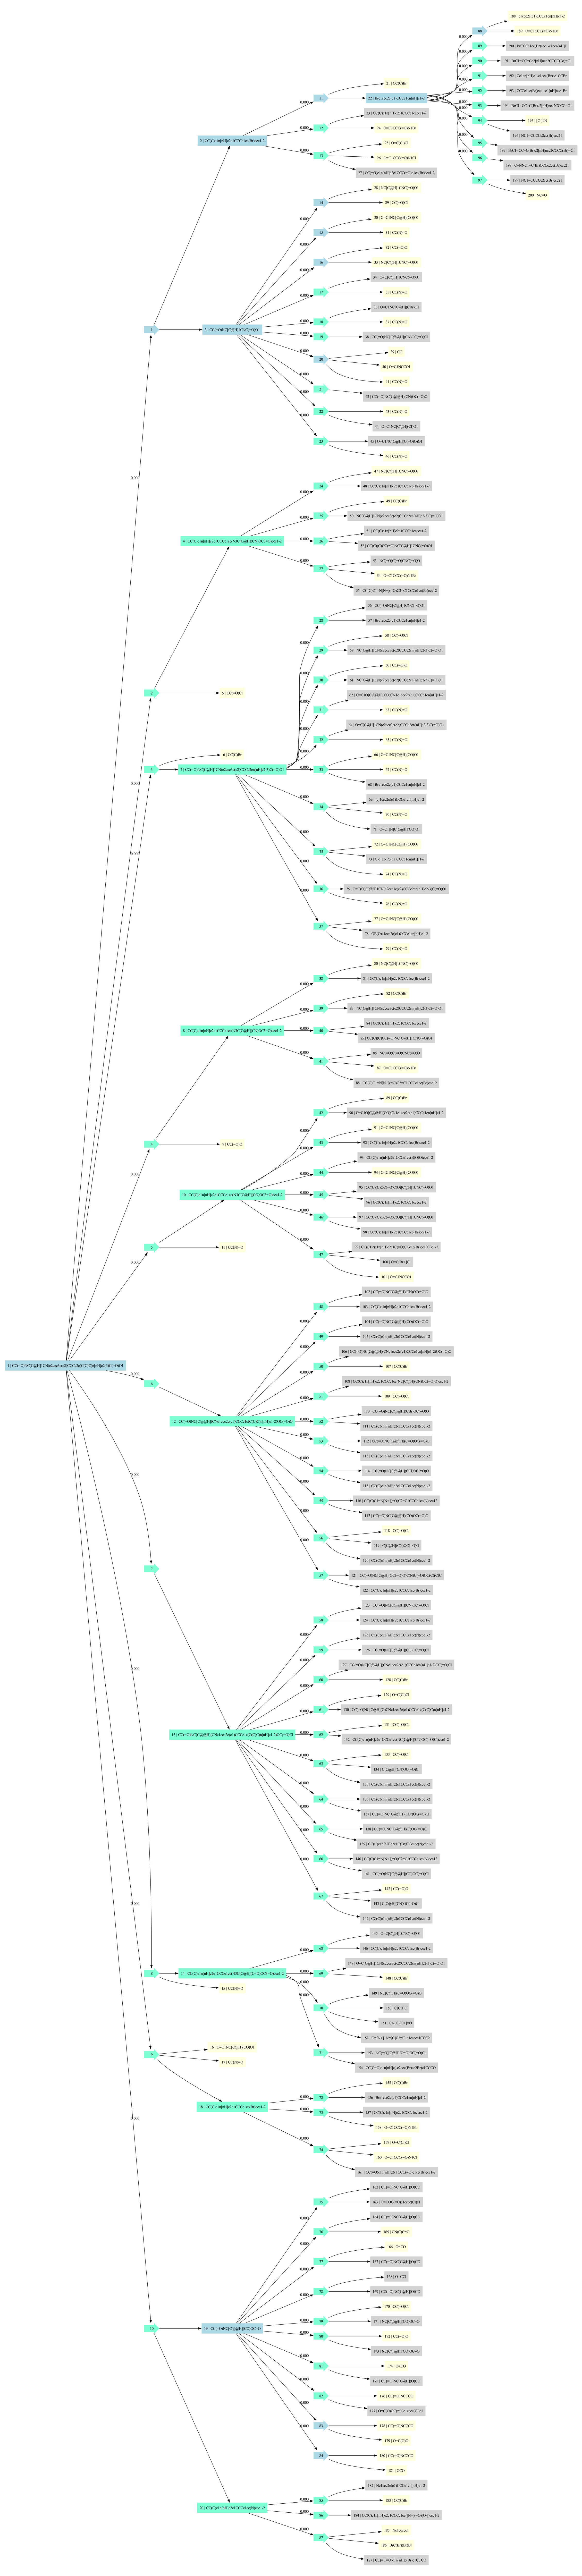

Supplement: supplementary_material [file mol_118_search_tree.pdf › materials9084/retro190_solutions/mol_118_search_tree.pdf]

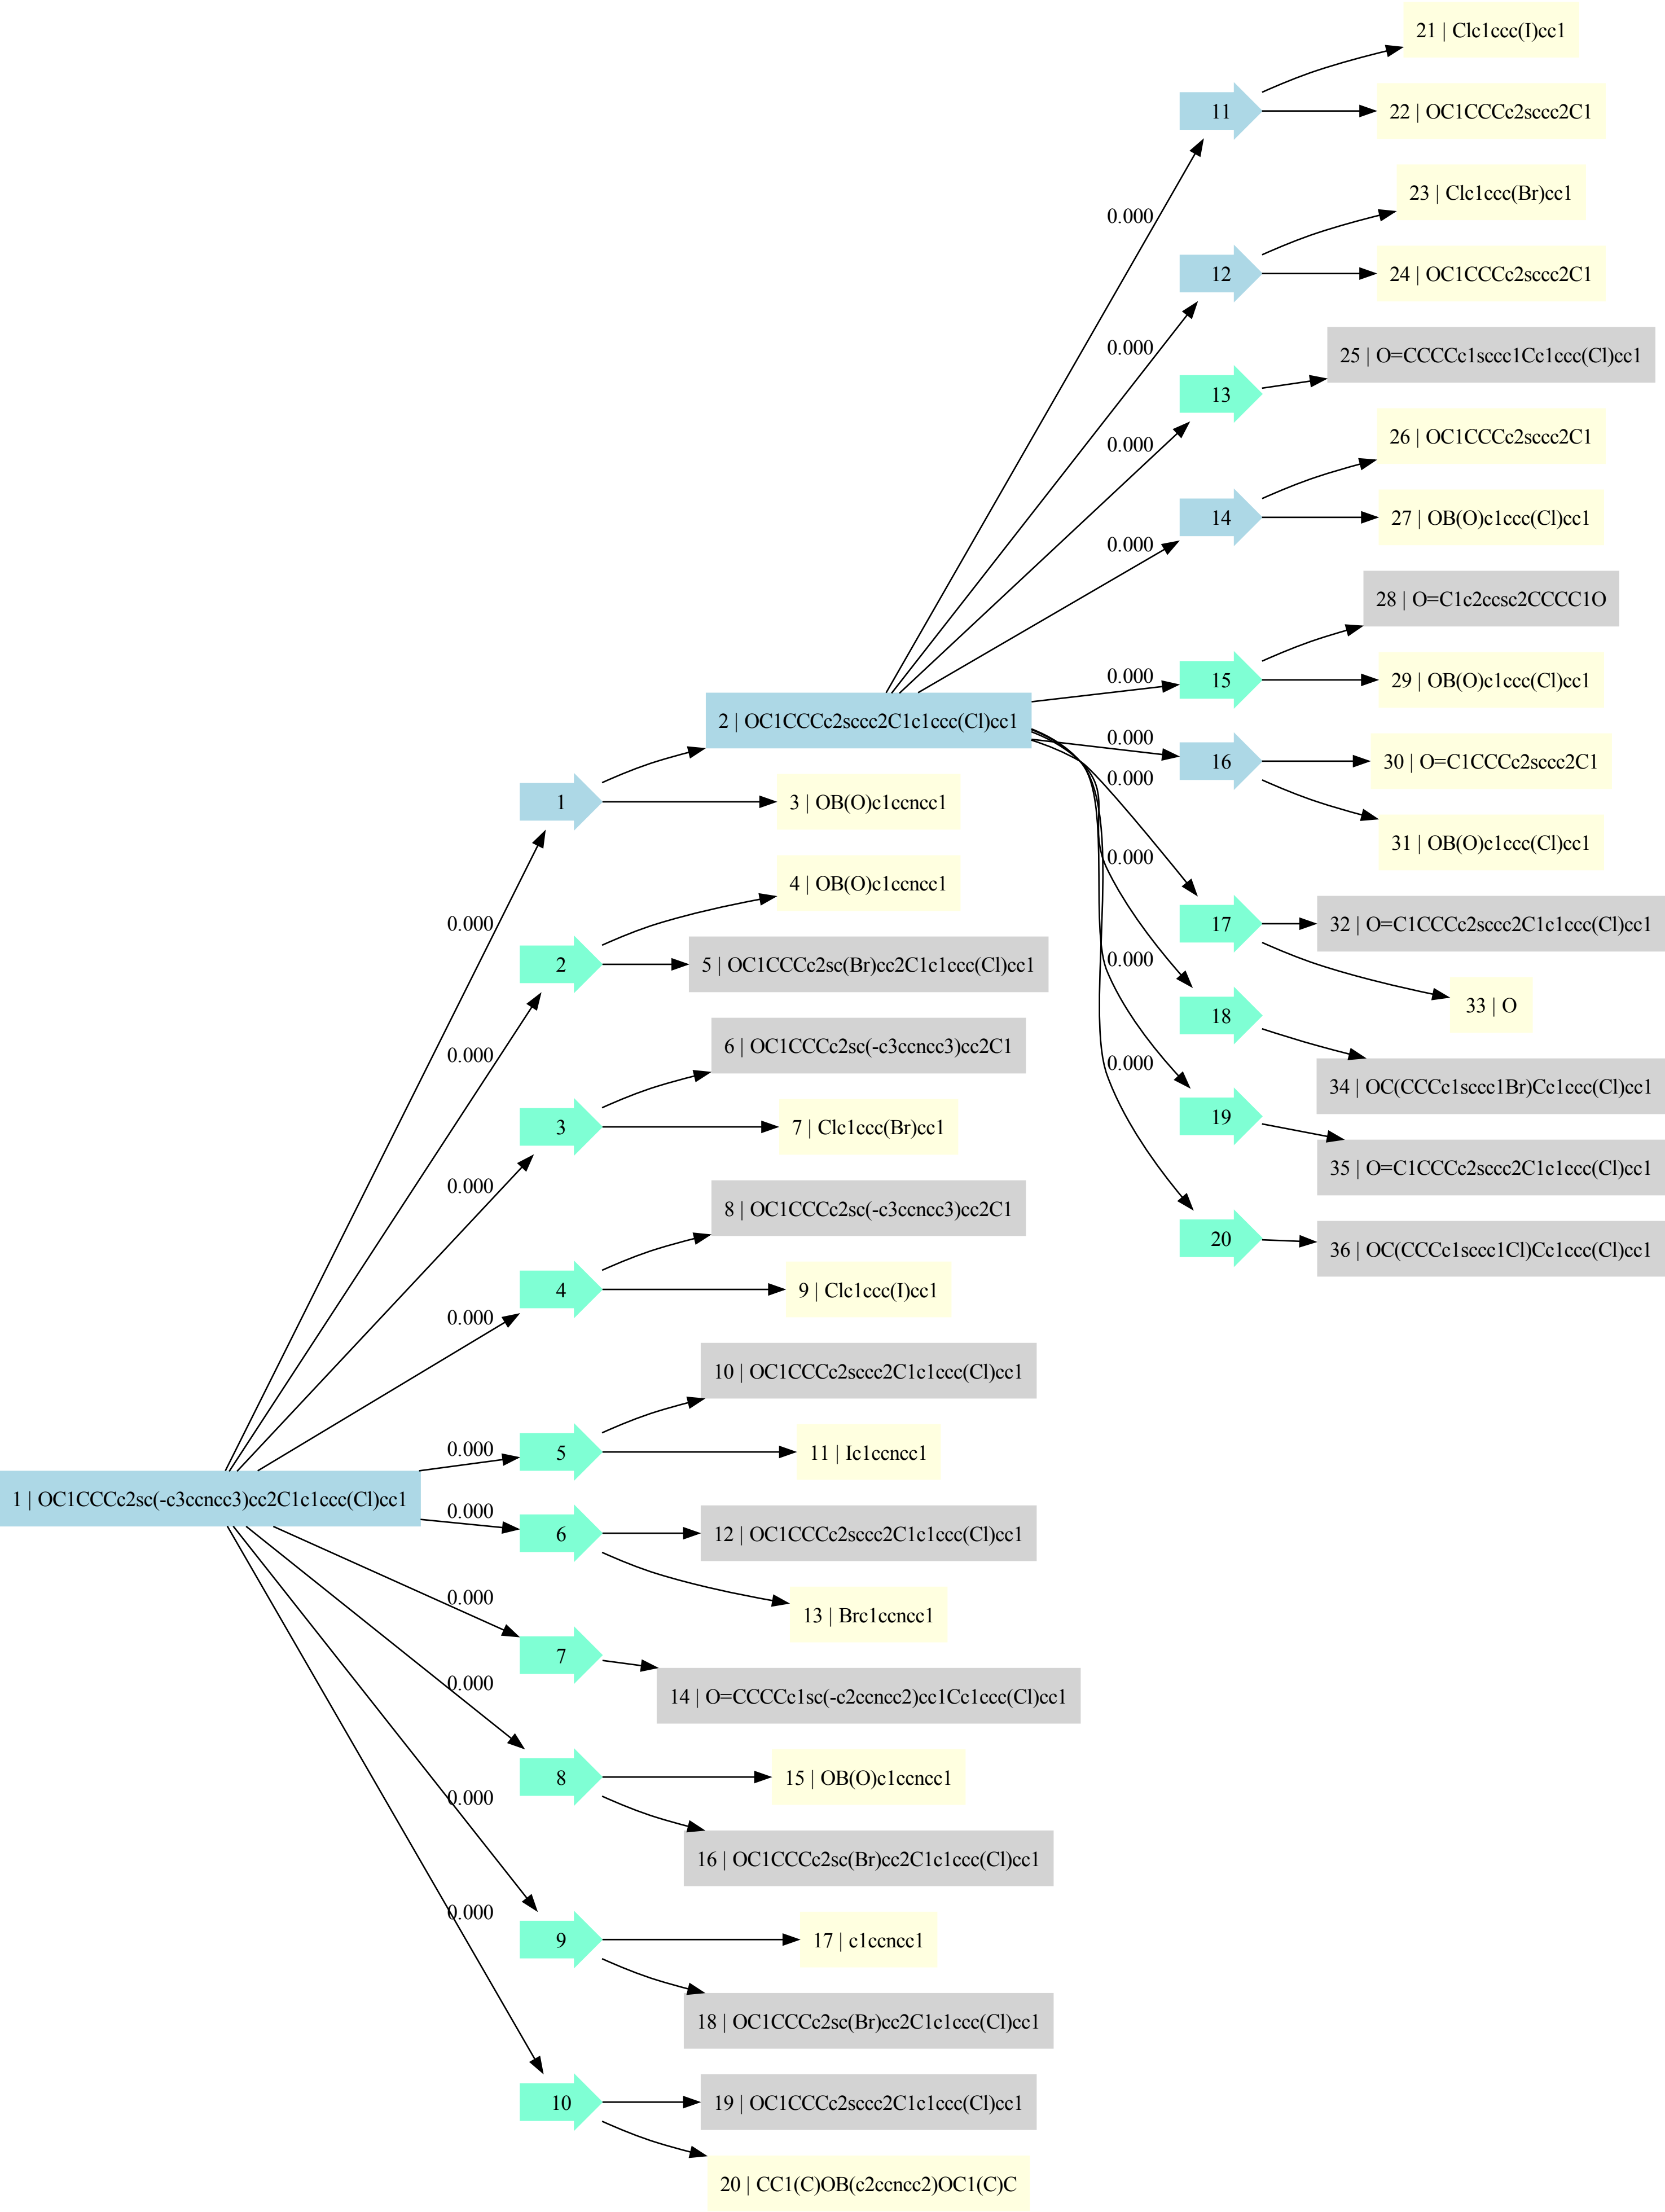

Supplement: supplementary_material [file mol_119_search_tree.pdf › materials9084/retro190_solutions/mol_119_search_tree.pdf]

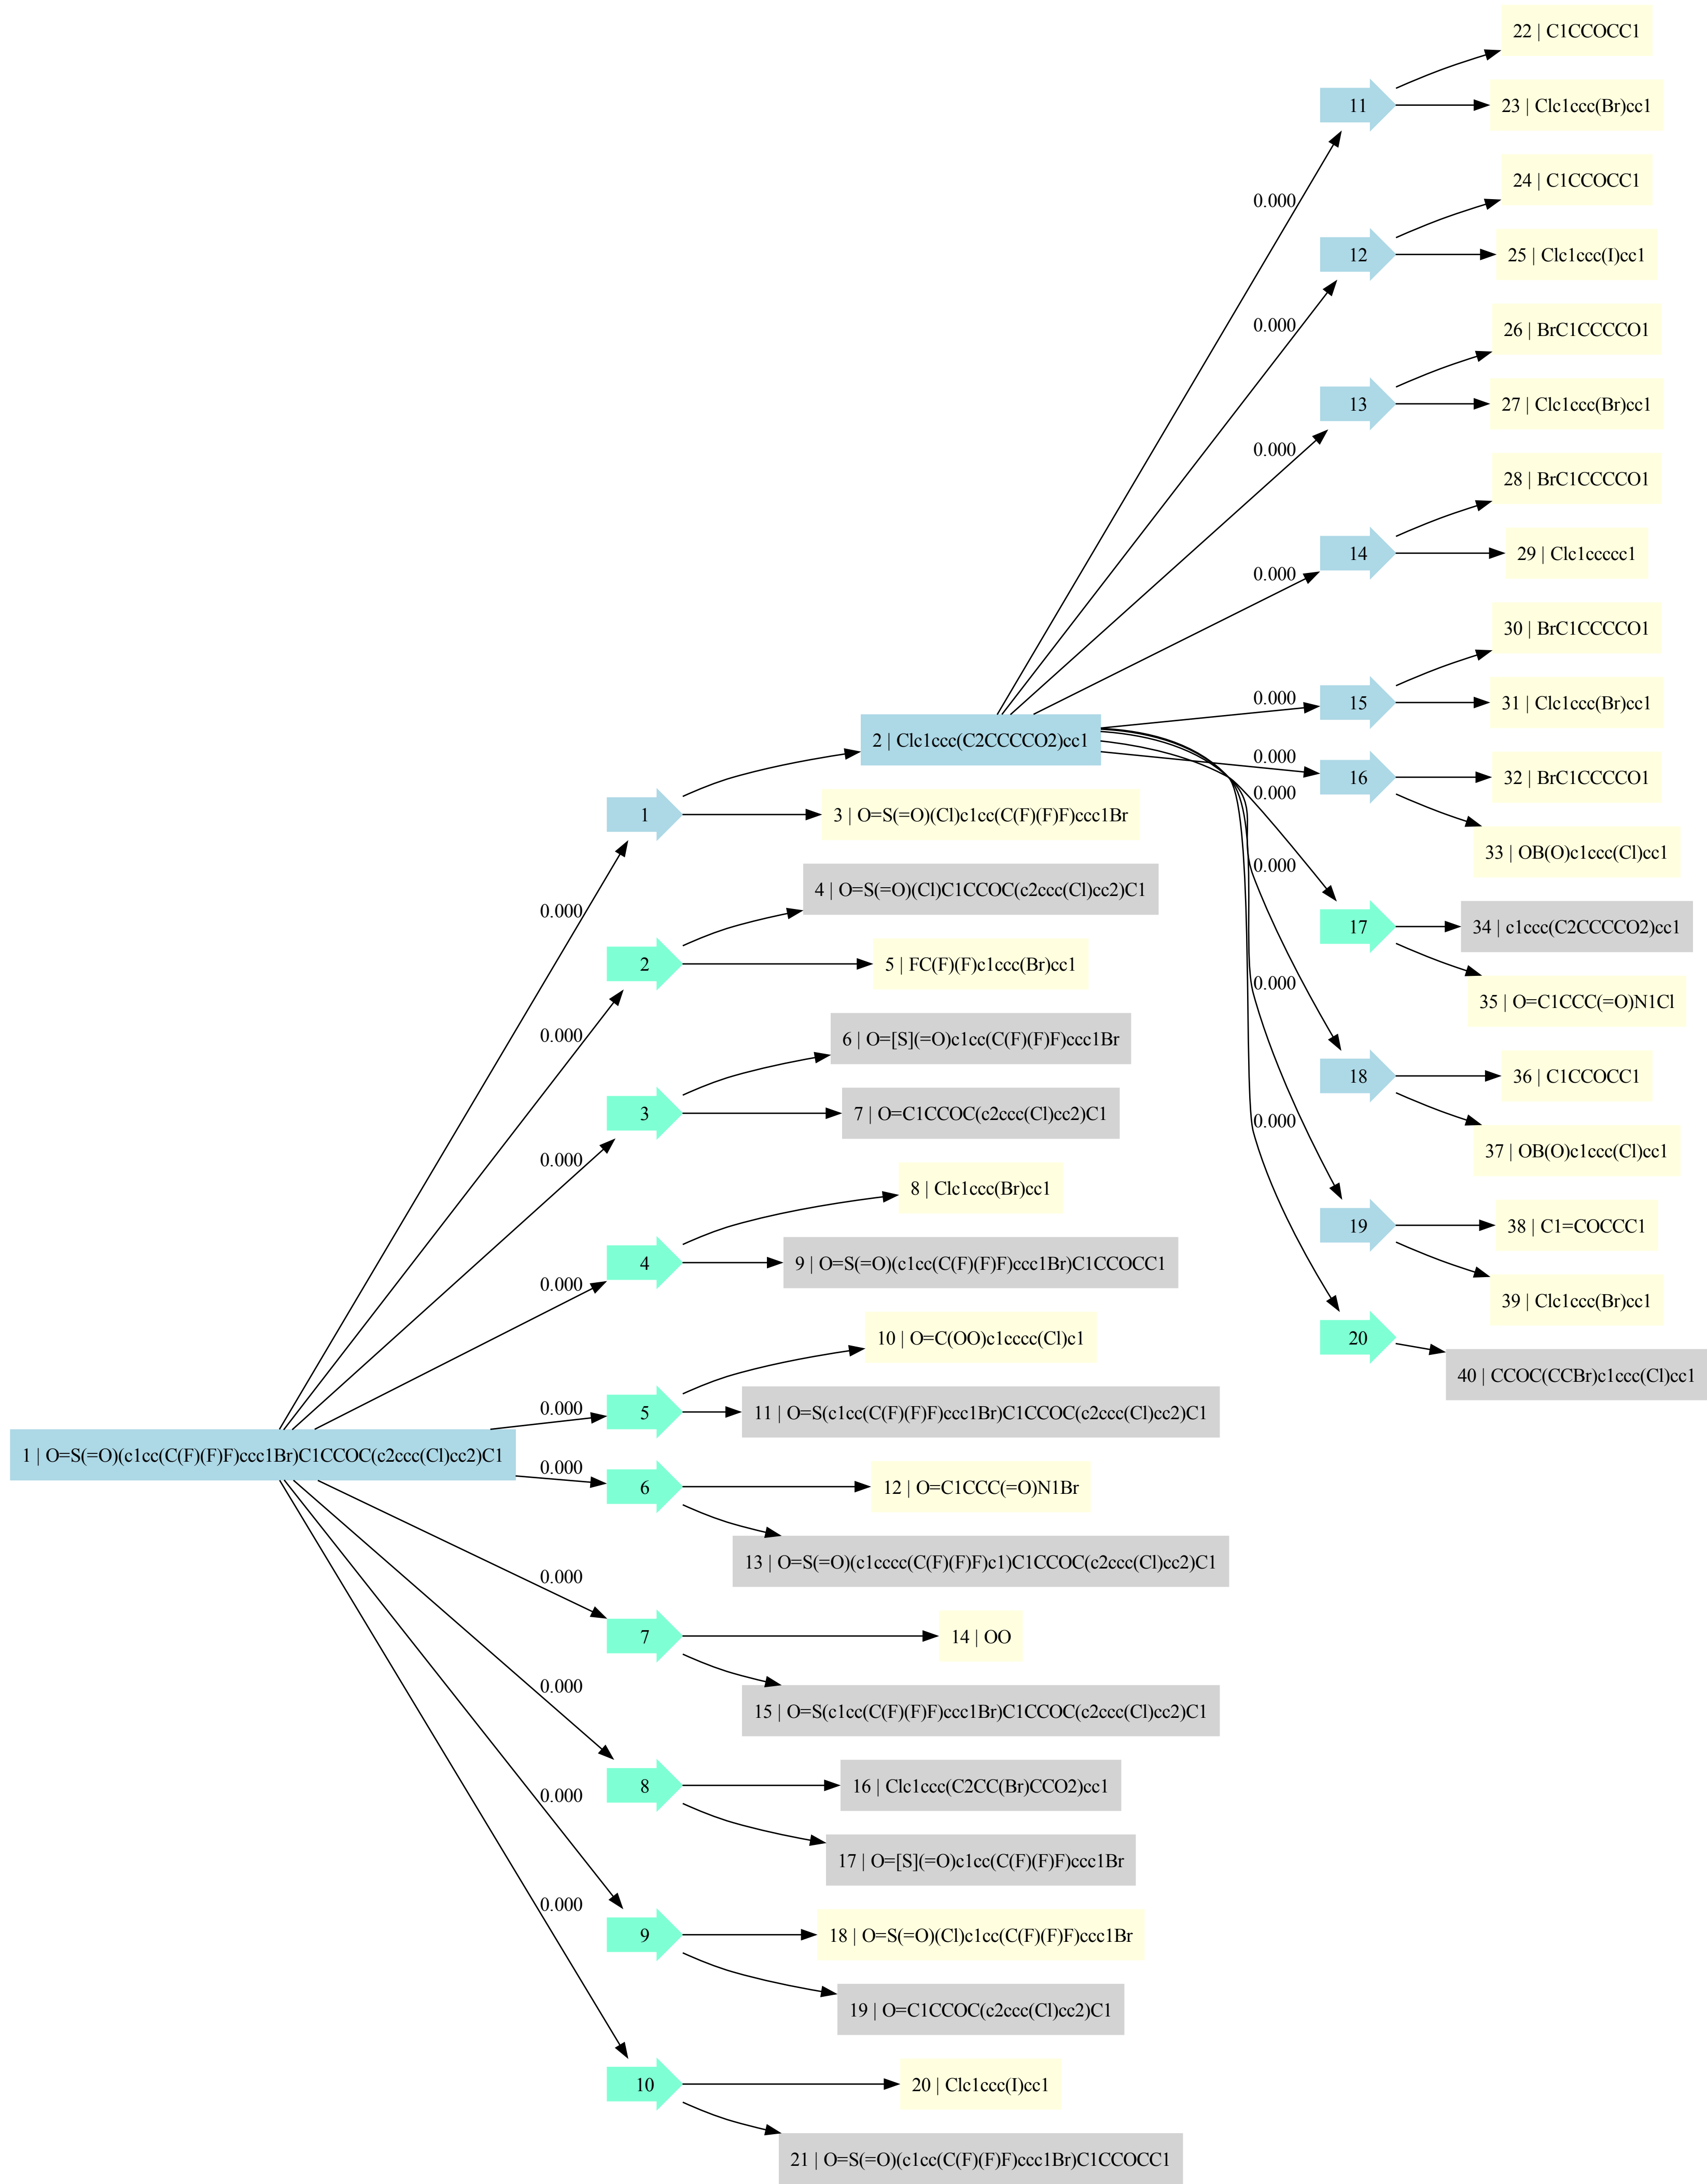

Supplement: supplementary_material [file mol_11_search_tree.pdf › materials9084/retro190_solutions/mol_11_search_tree.pdf]

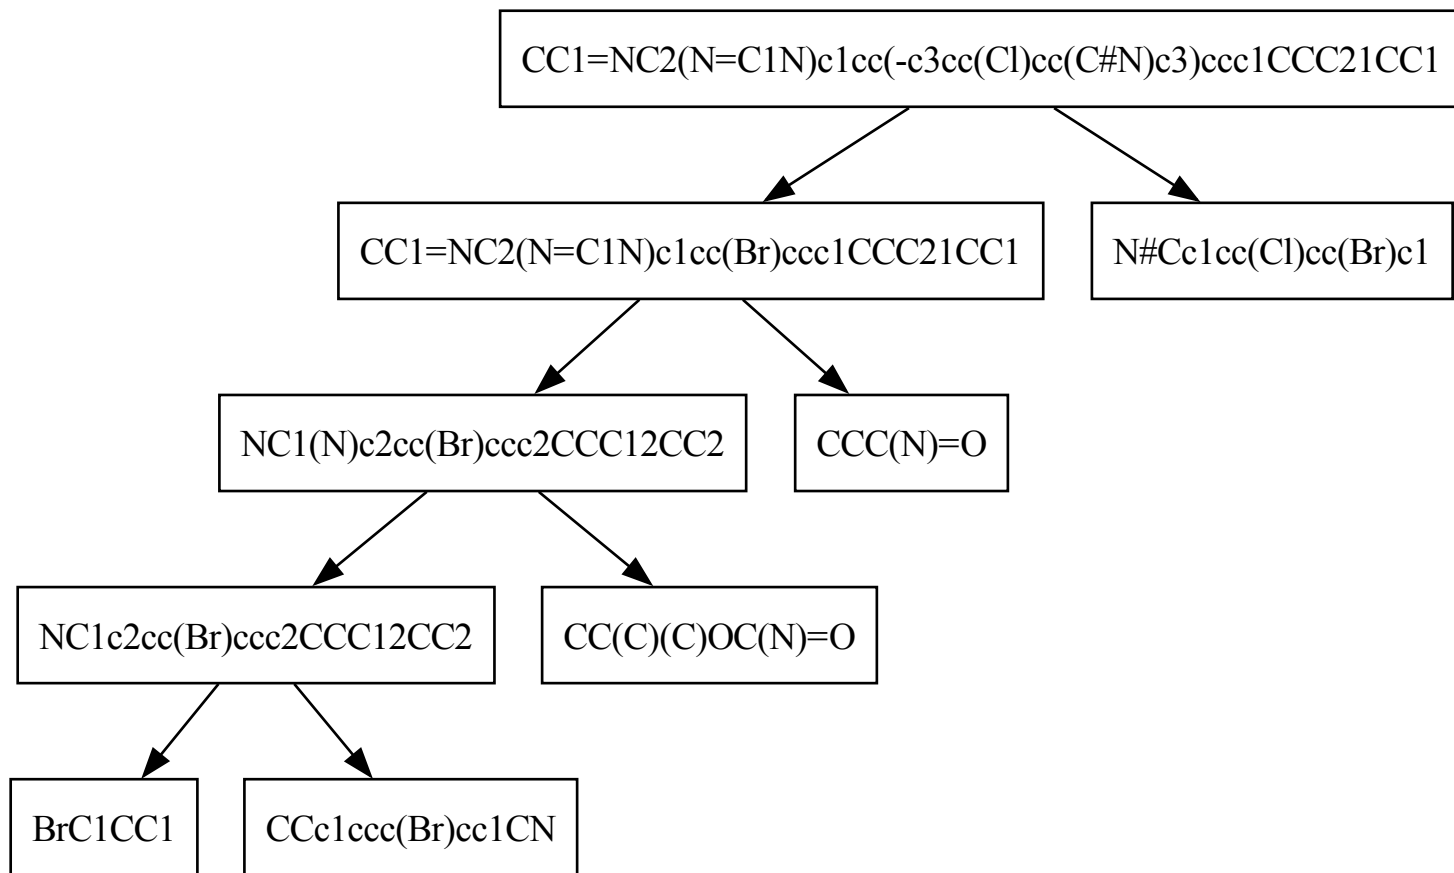

Supplement: supplementary_material [file mol_122_route_optimal.pdf › materials9084/retro190_solutions/mol_122_route_optimal.pdf]

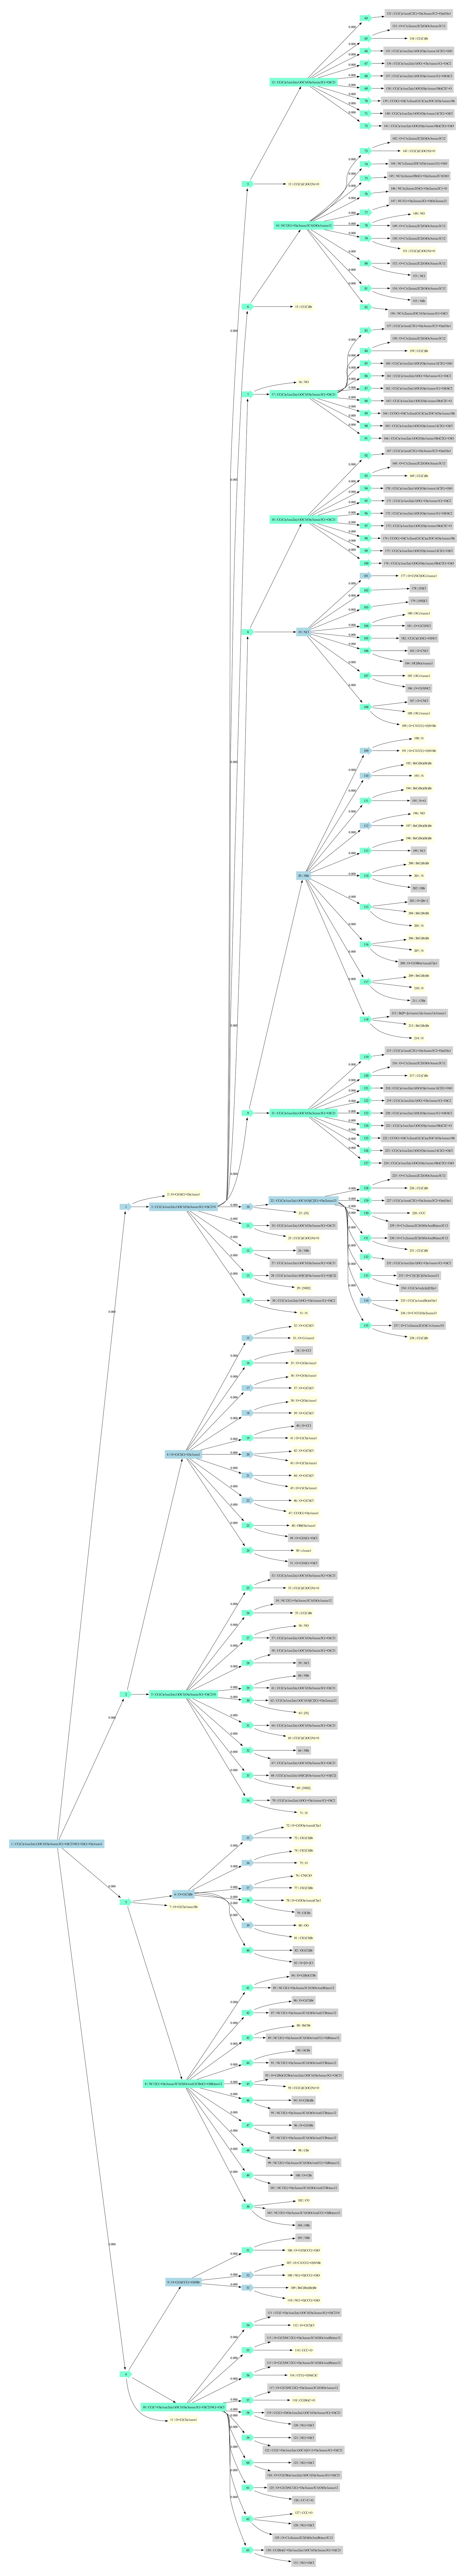

Supplement: supplementary_material [file mol_123_search_tree.pdf › materials9084/retro190_solutions/mol_123_search_tree.pdf]

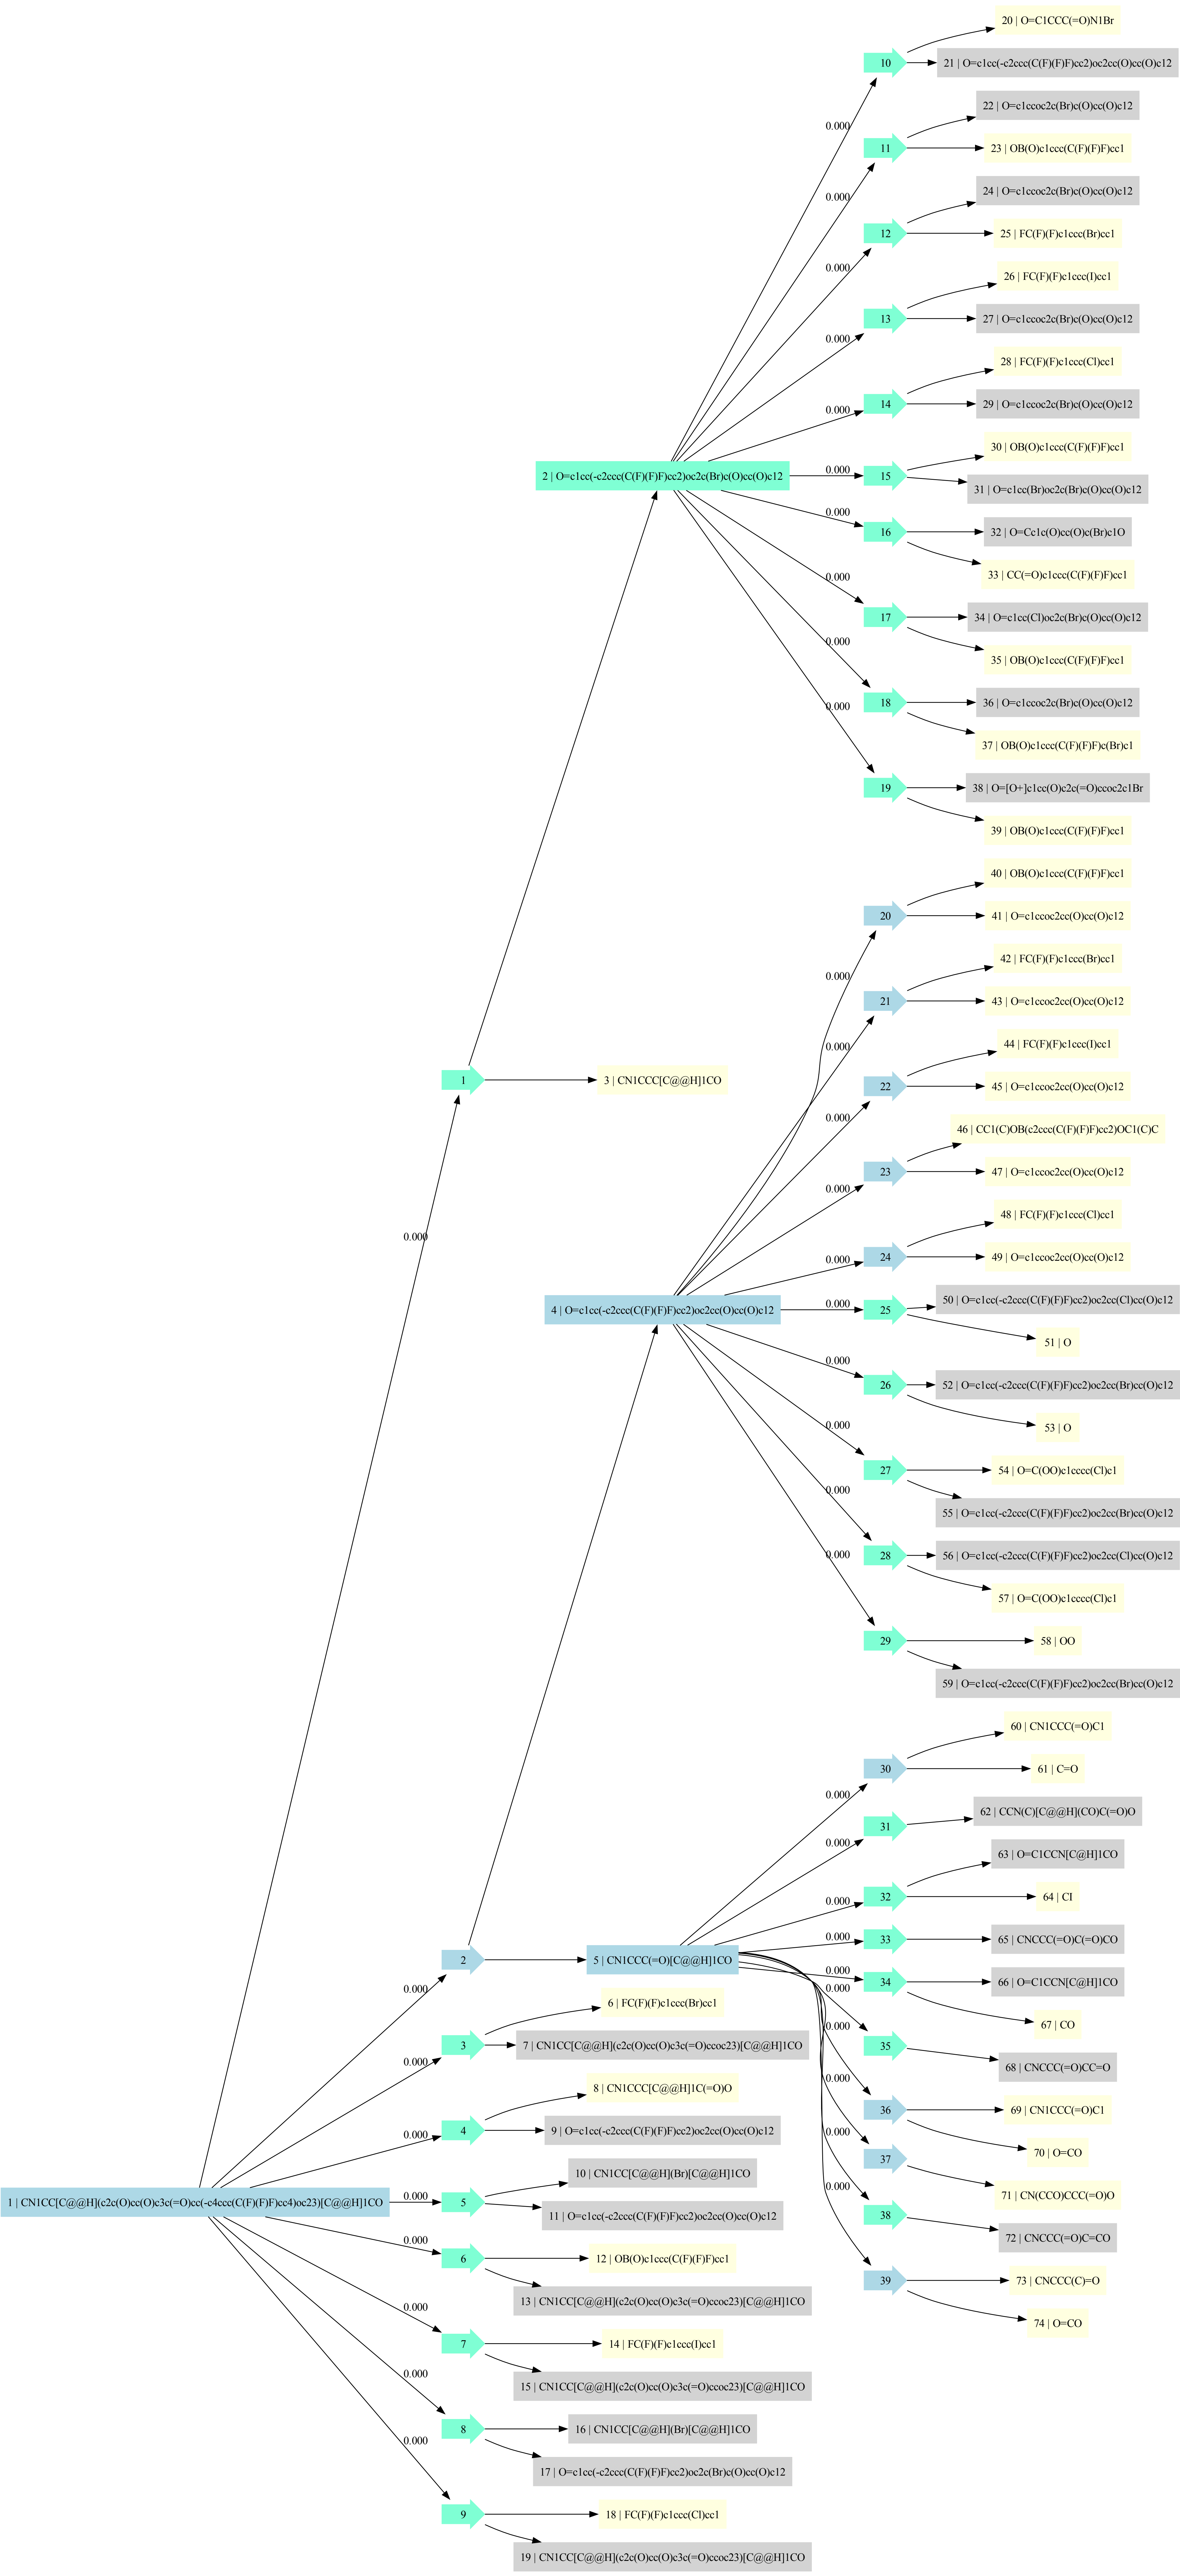

Supplement: supplementary_material [file mol_124_search_tree.pdf › materials9084/retro190_solutions/mol_124_search_tree.pdf]

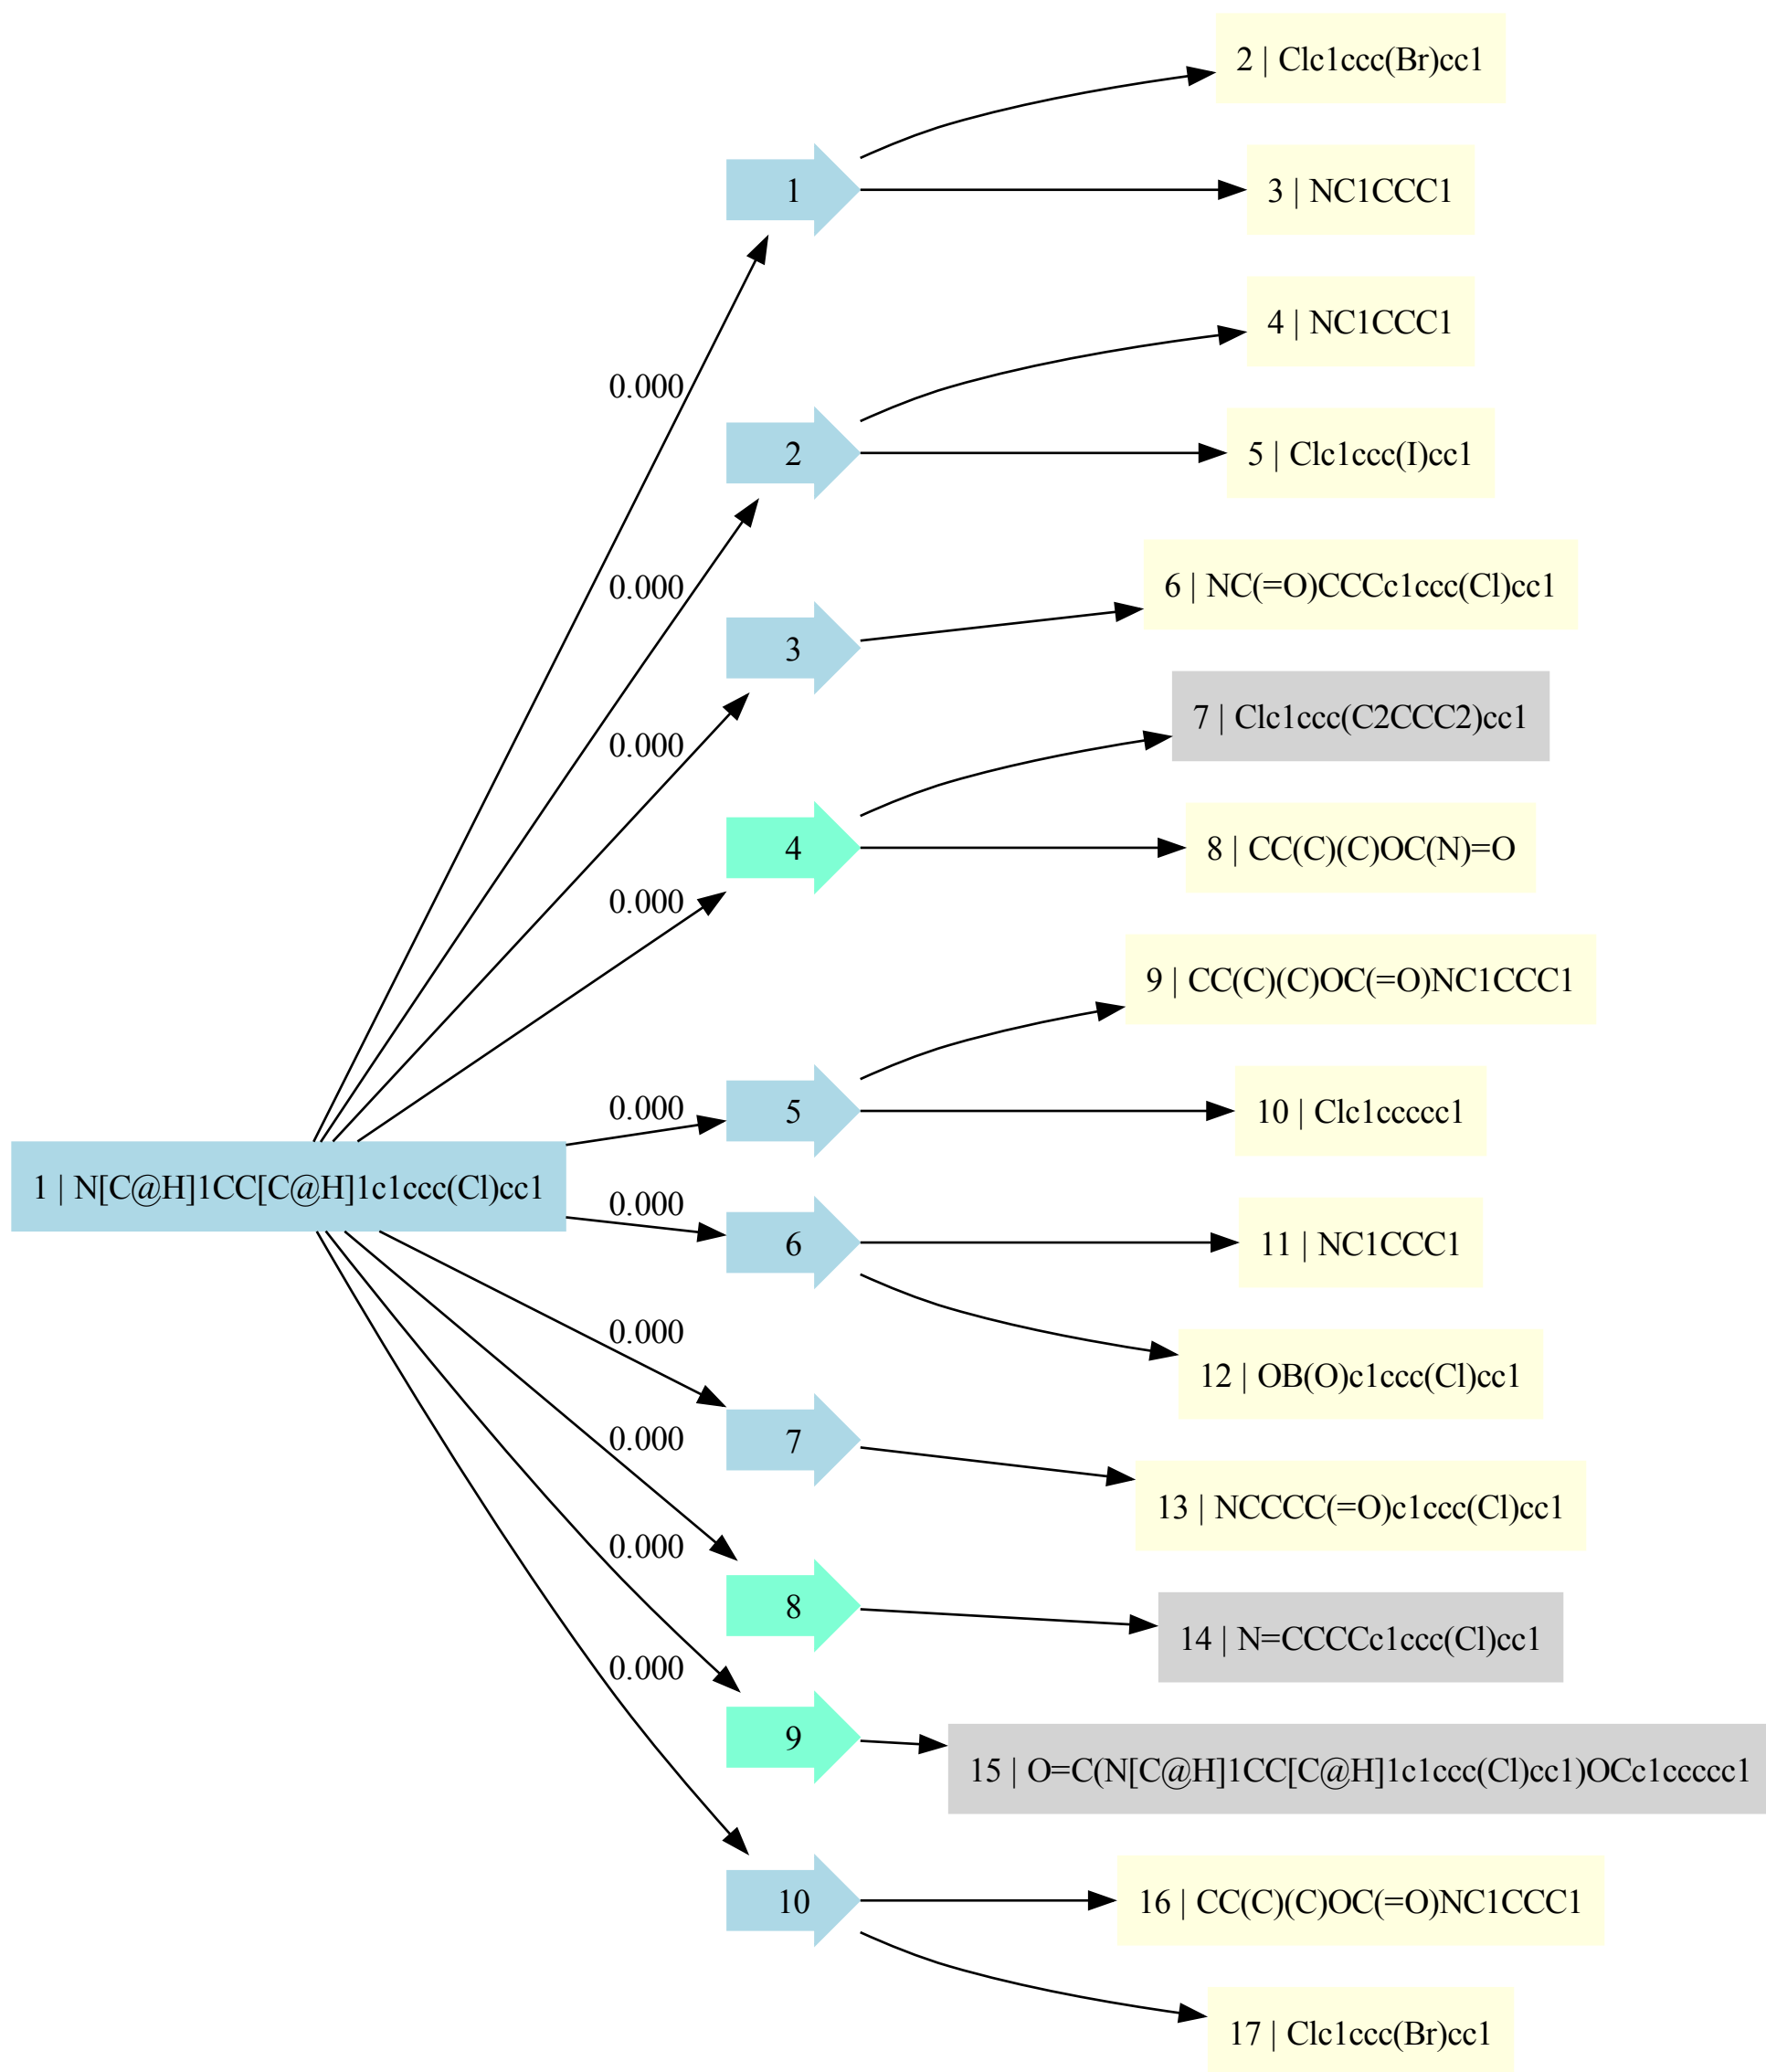

Supplement: supplementary_material [file mol_125_search_tree.pdf › materials9084/retro190_solutions/mol_125_search_tree.pdf]

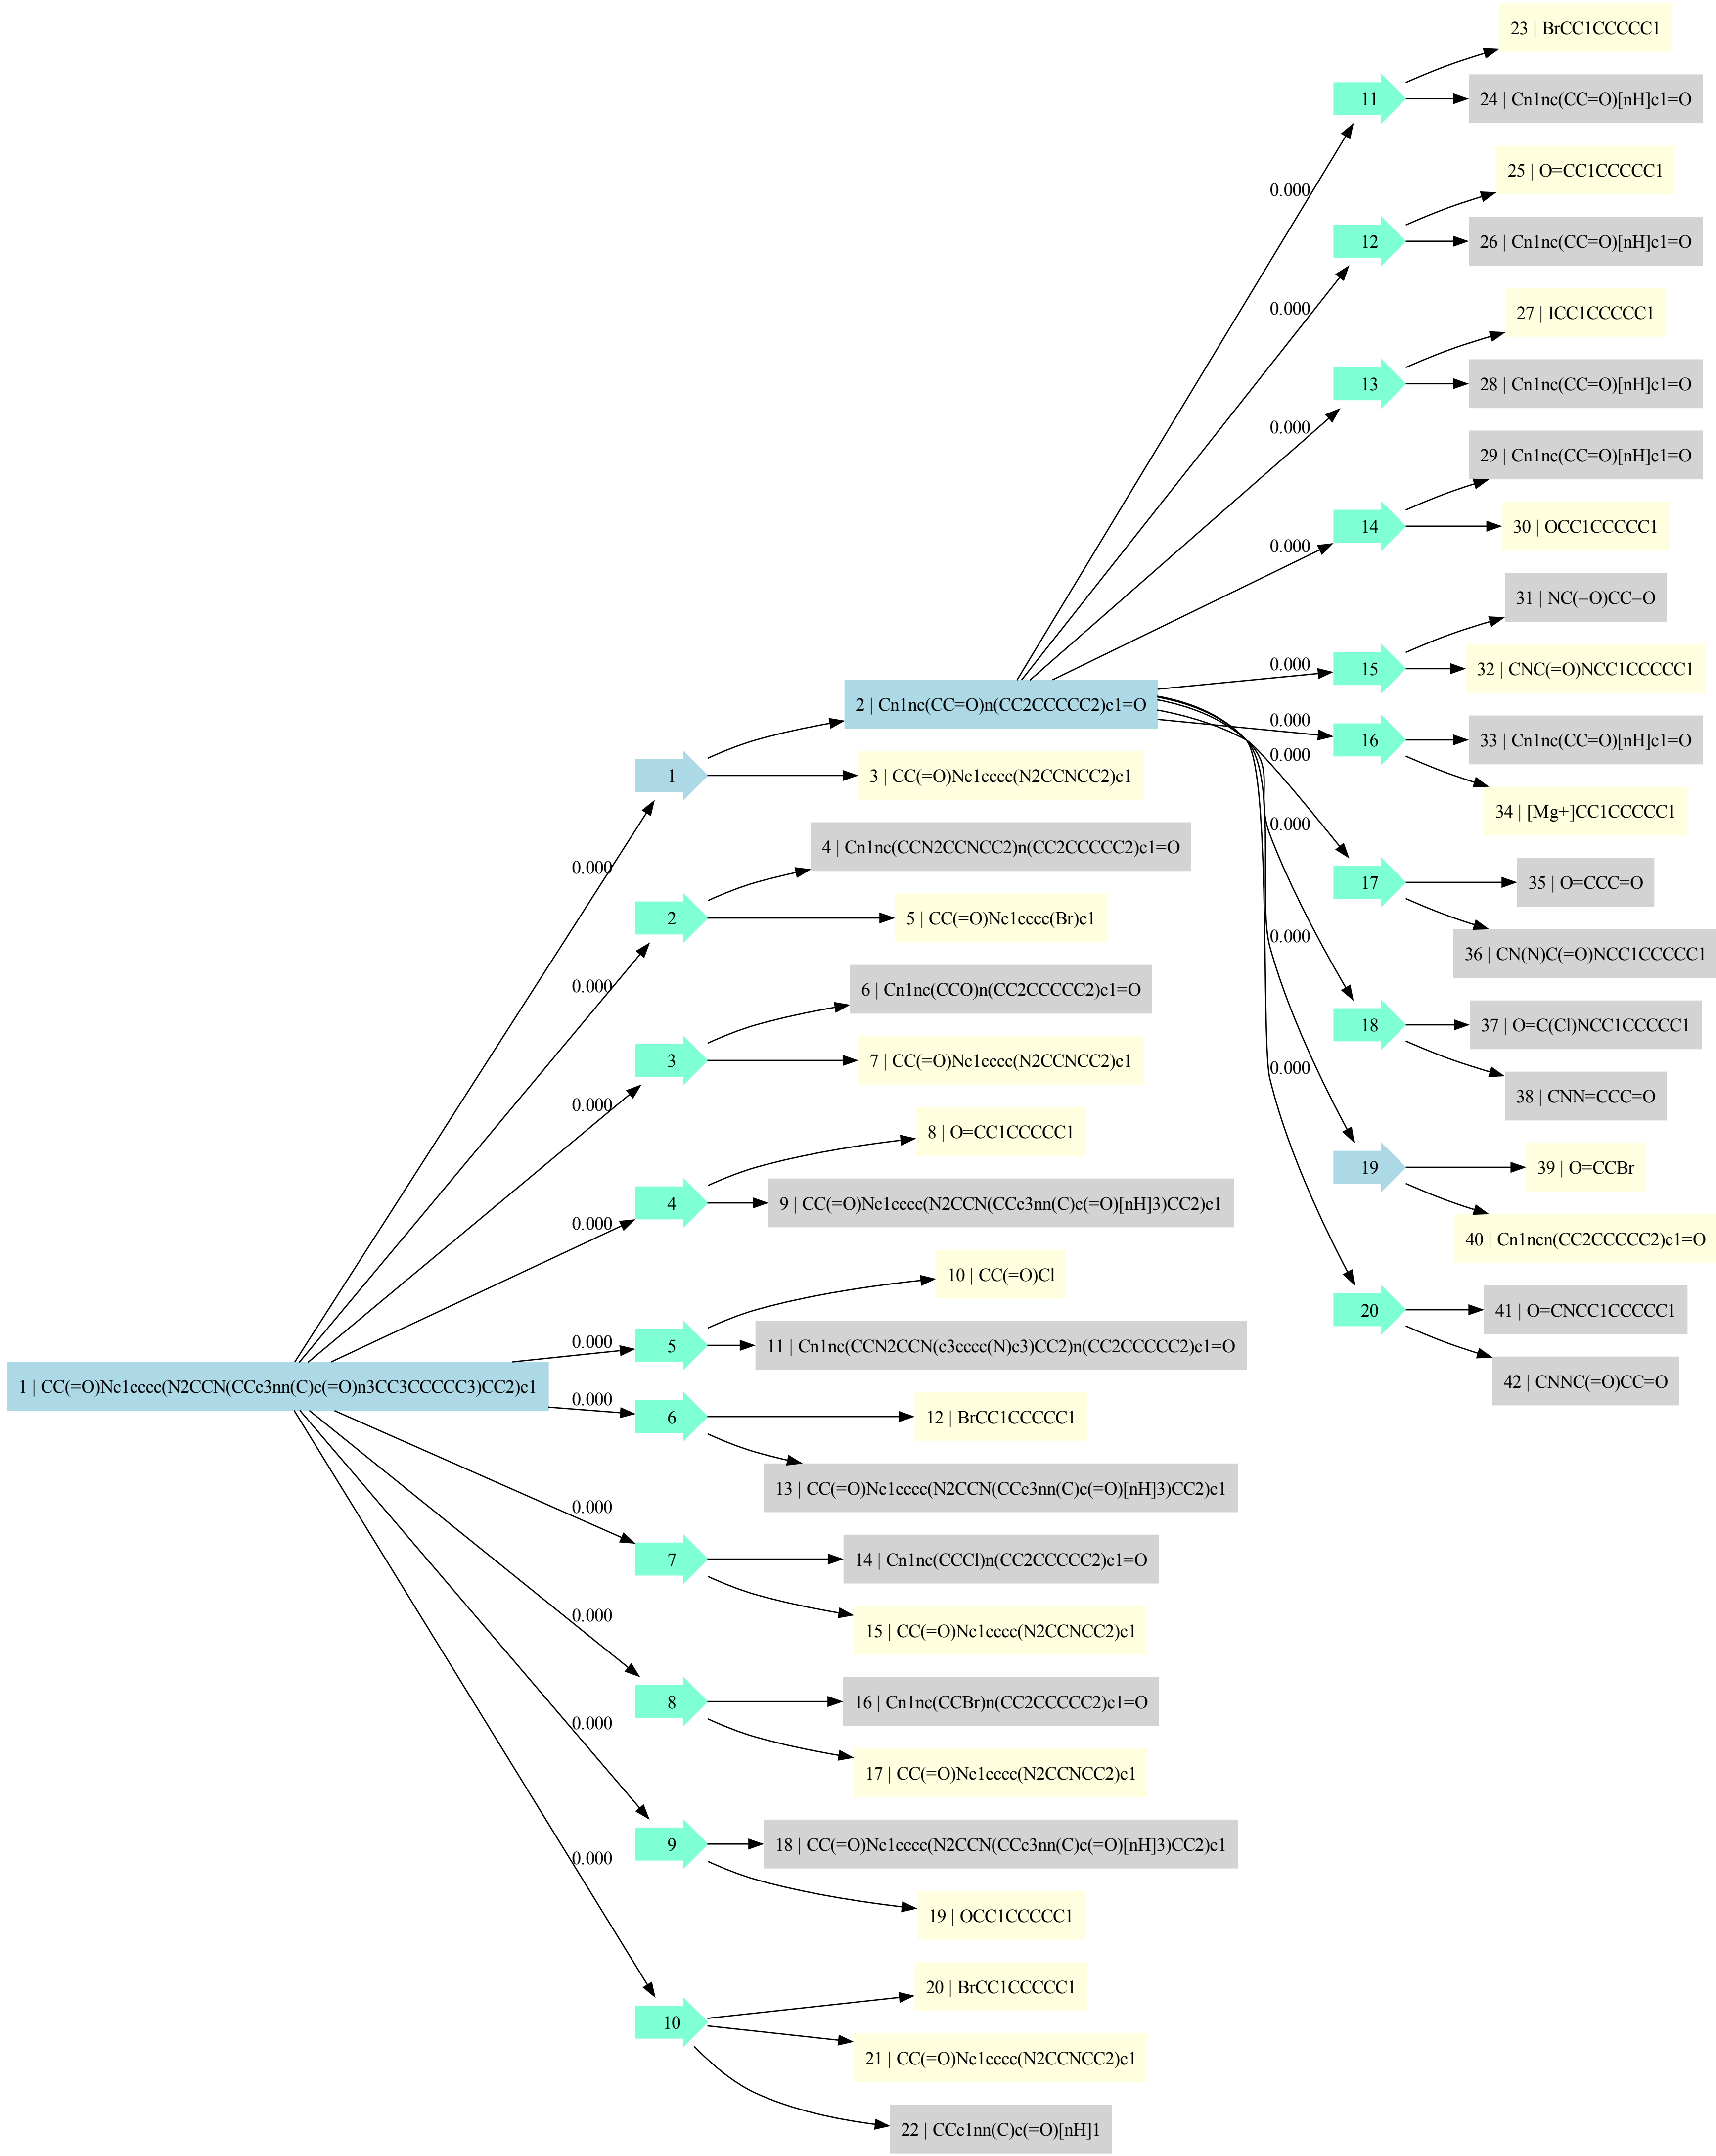

Supplement: supplementary_material [file mol_126_search_tree.pdf › materials9084/retro190_solutions/mol_126_search_tree.pdf]

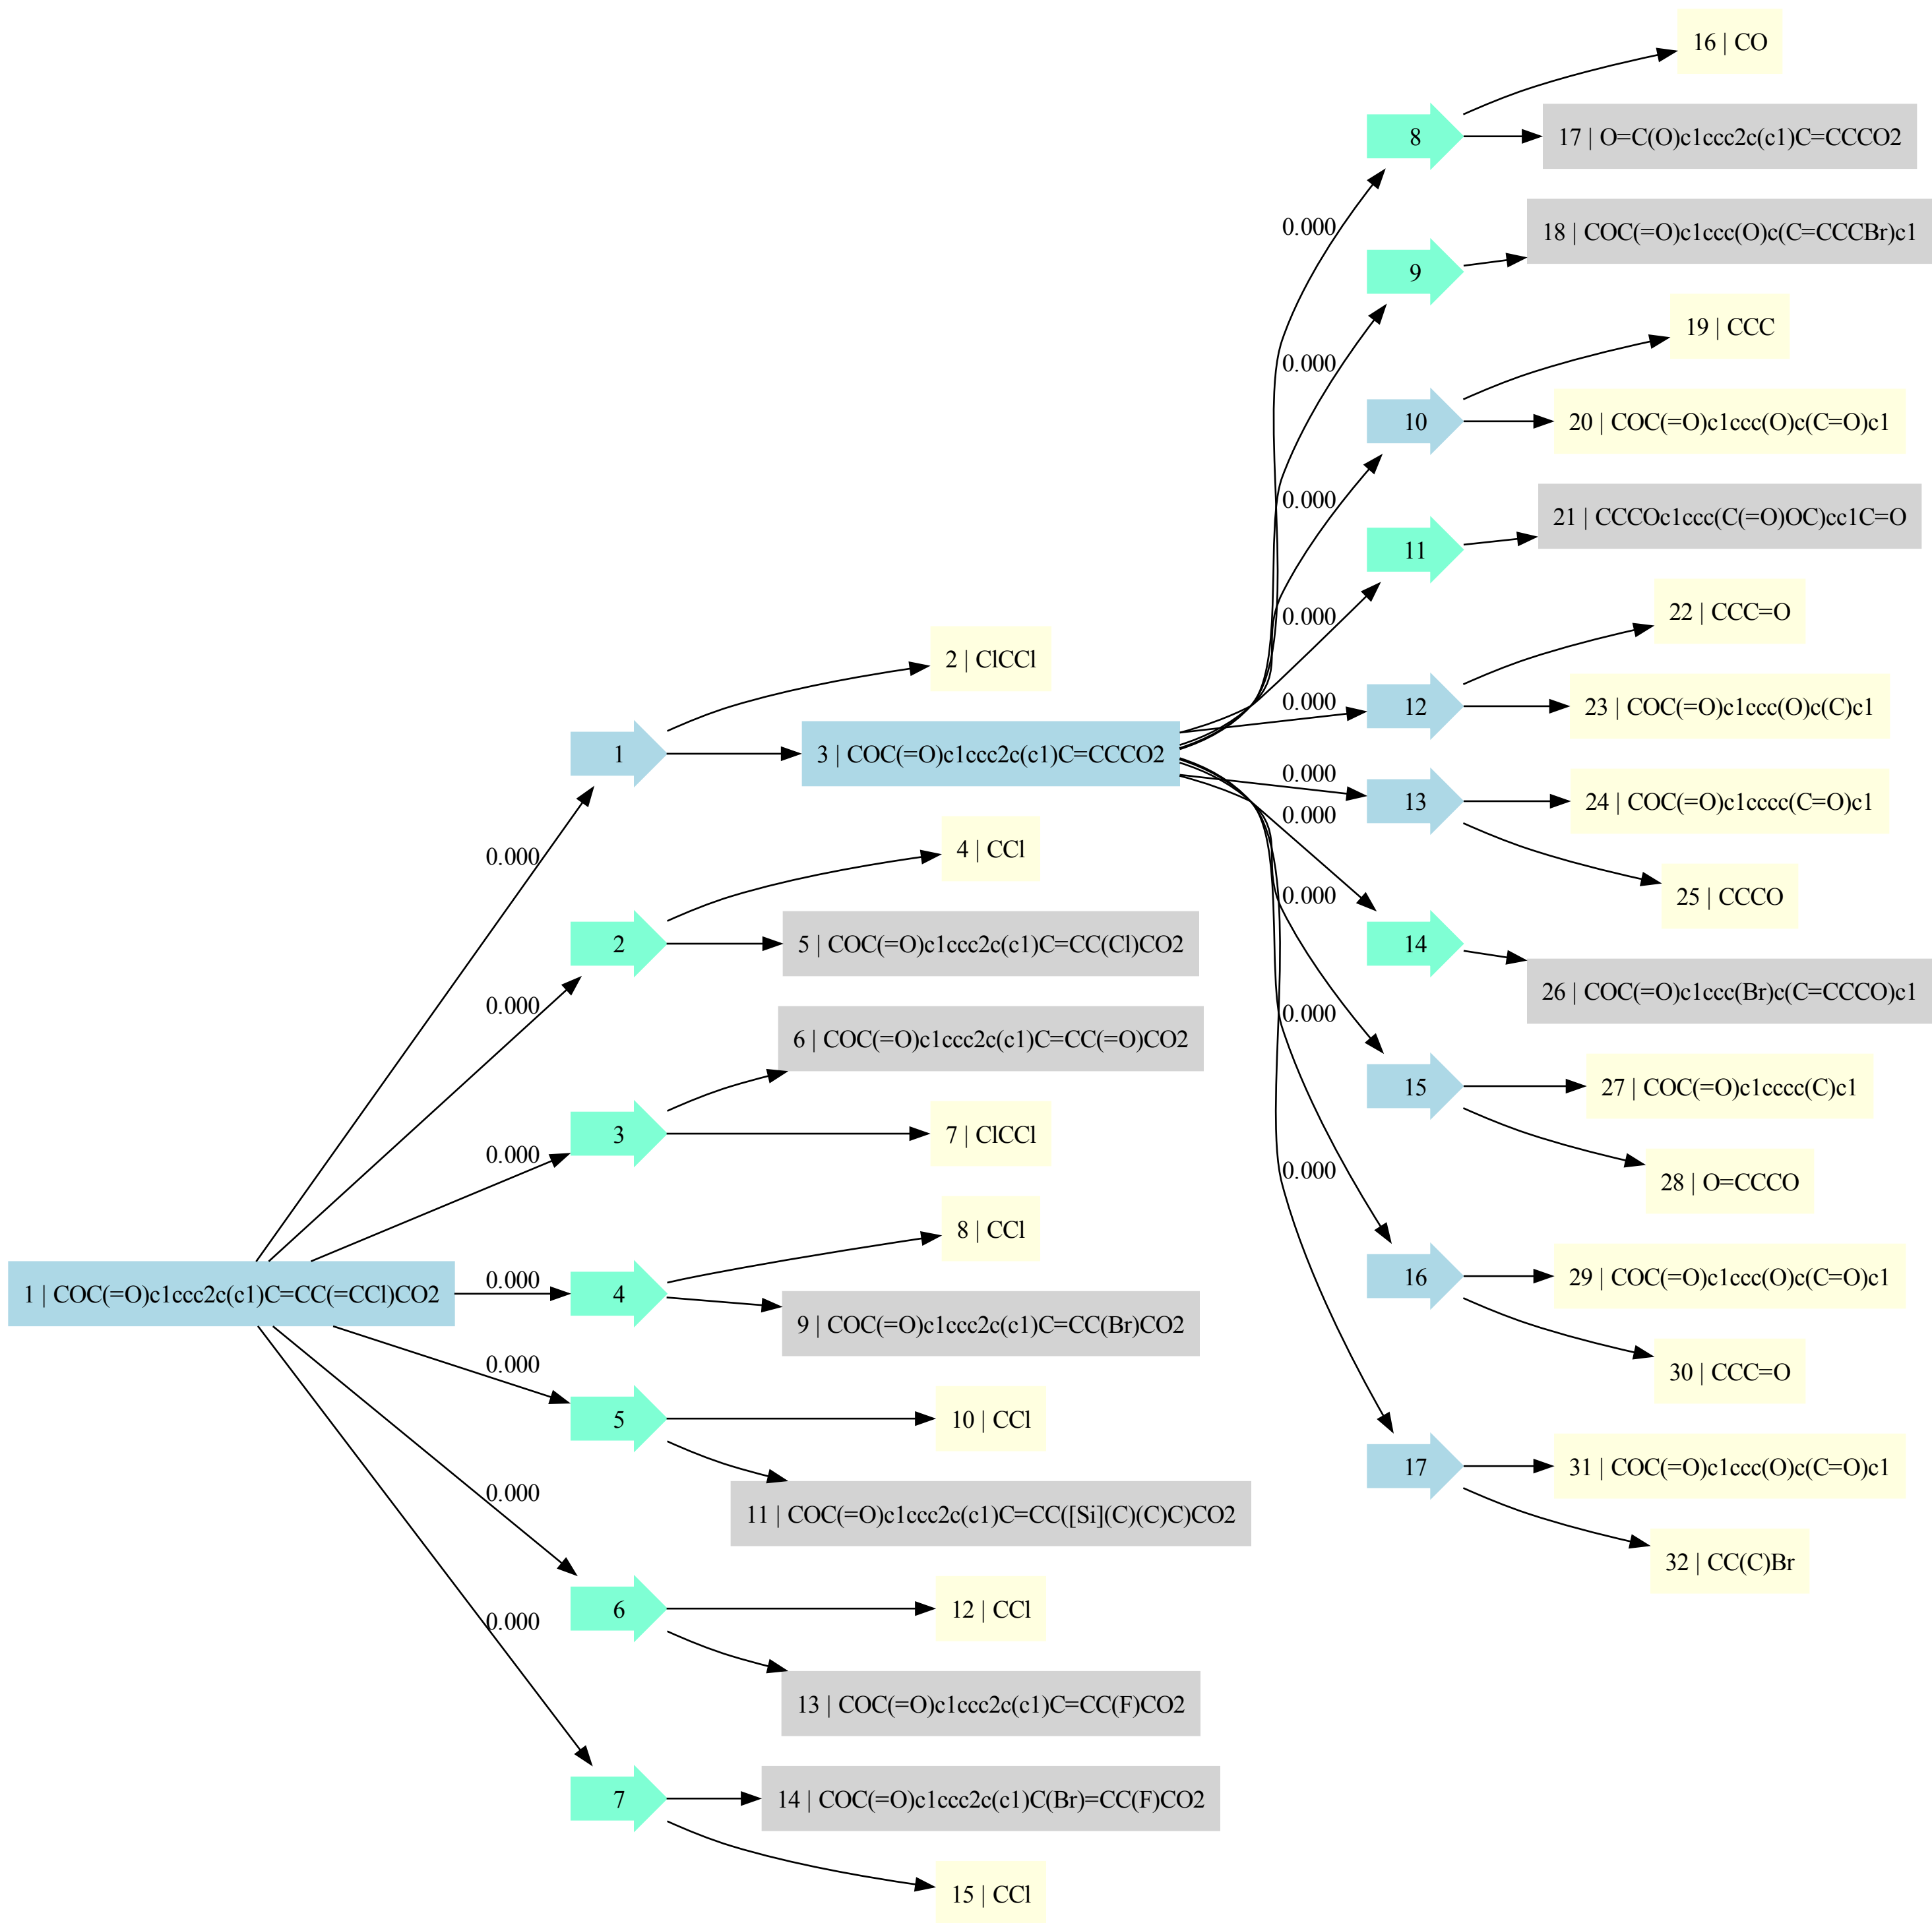

Supplement: supplementary_material [file mol_127_search_tree.pdf › materials9084/retro190_solutions/mol_127_search_tree.pdf]

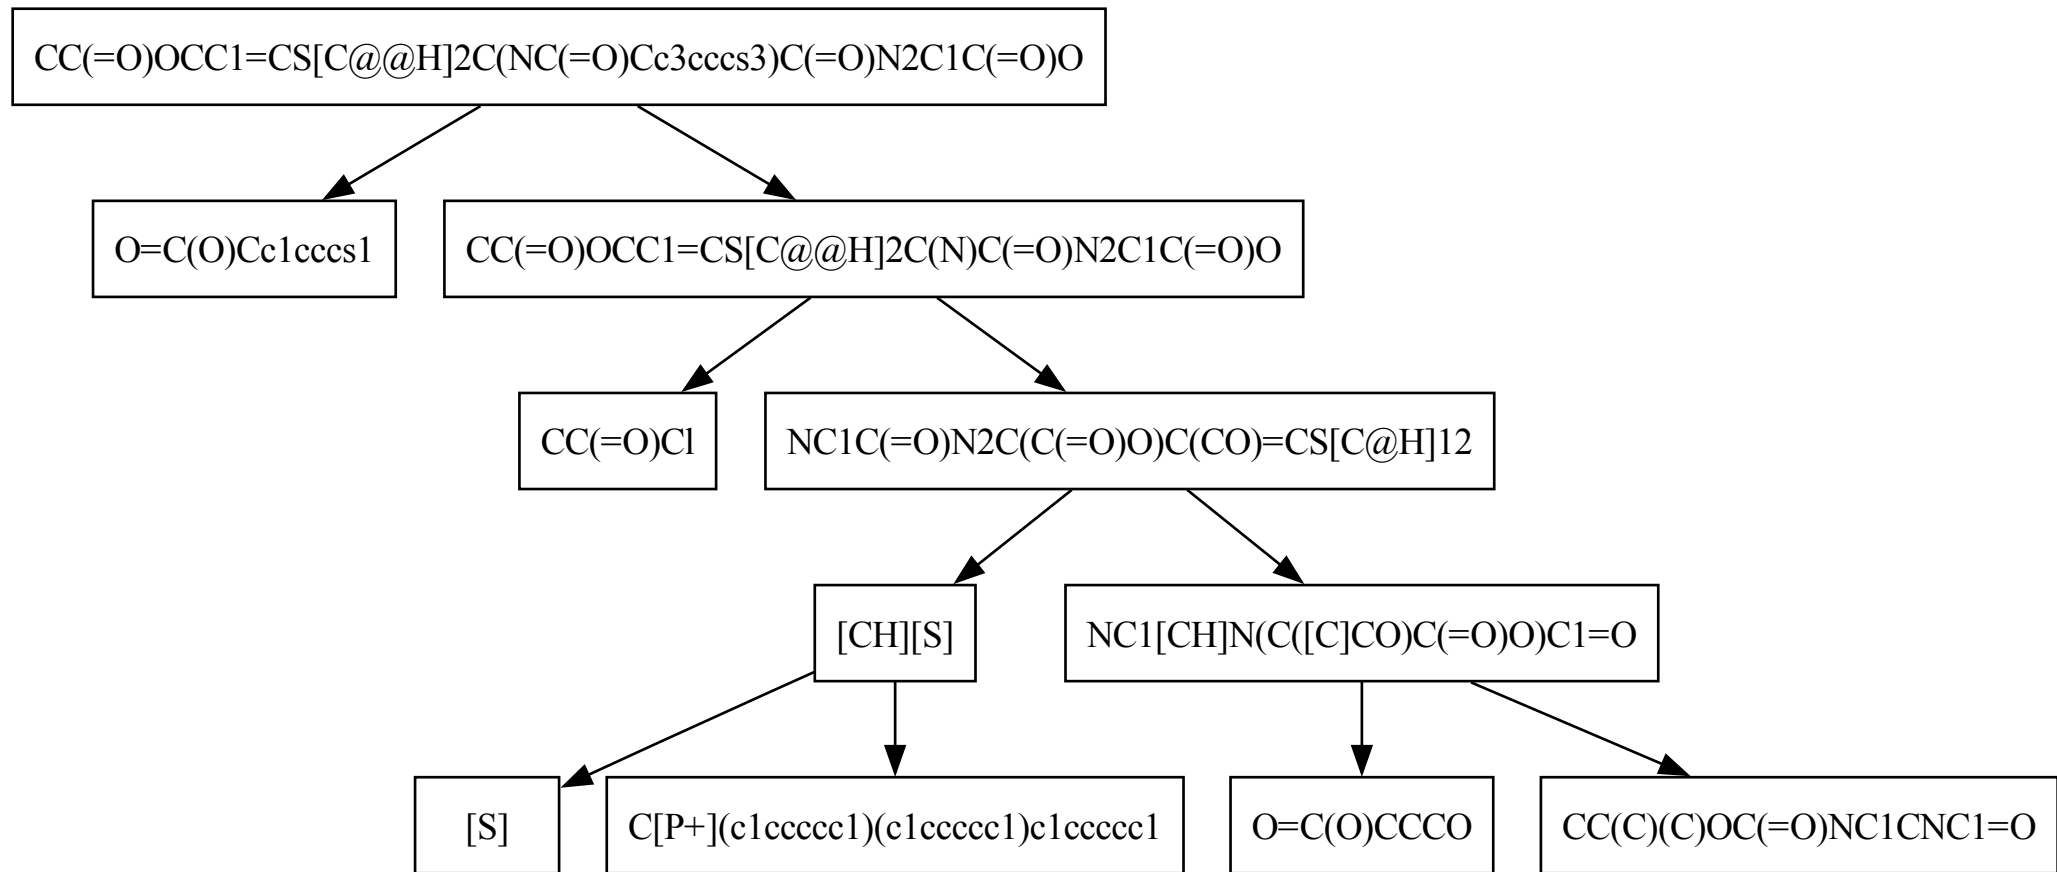

Supplement: supplementary_material [file mol_128_route_optimal.pdf › materials9084/retro190_solutions/mol_128_route_optimal.pdf]

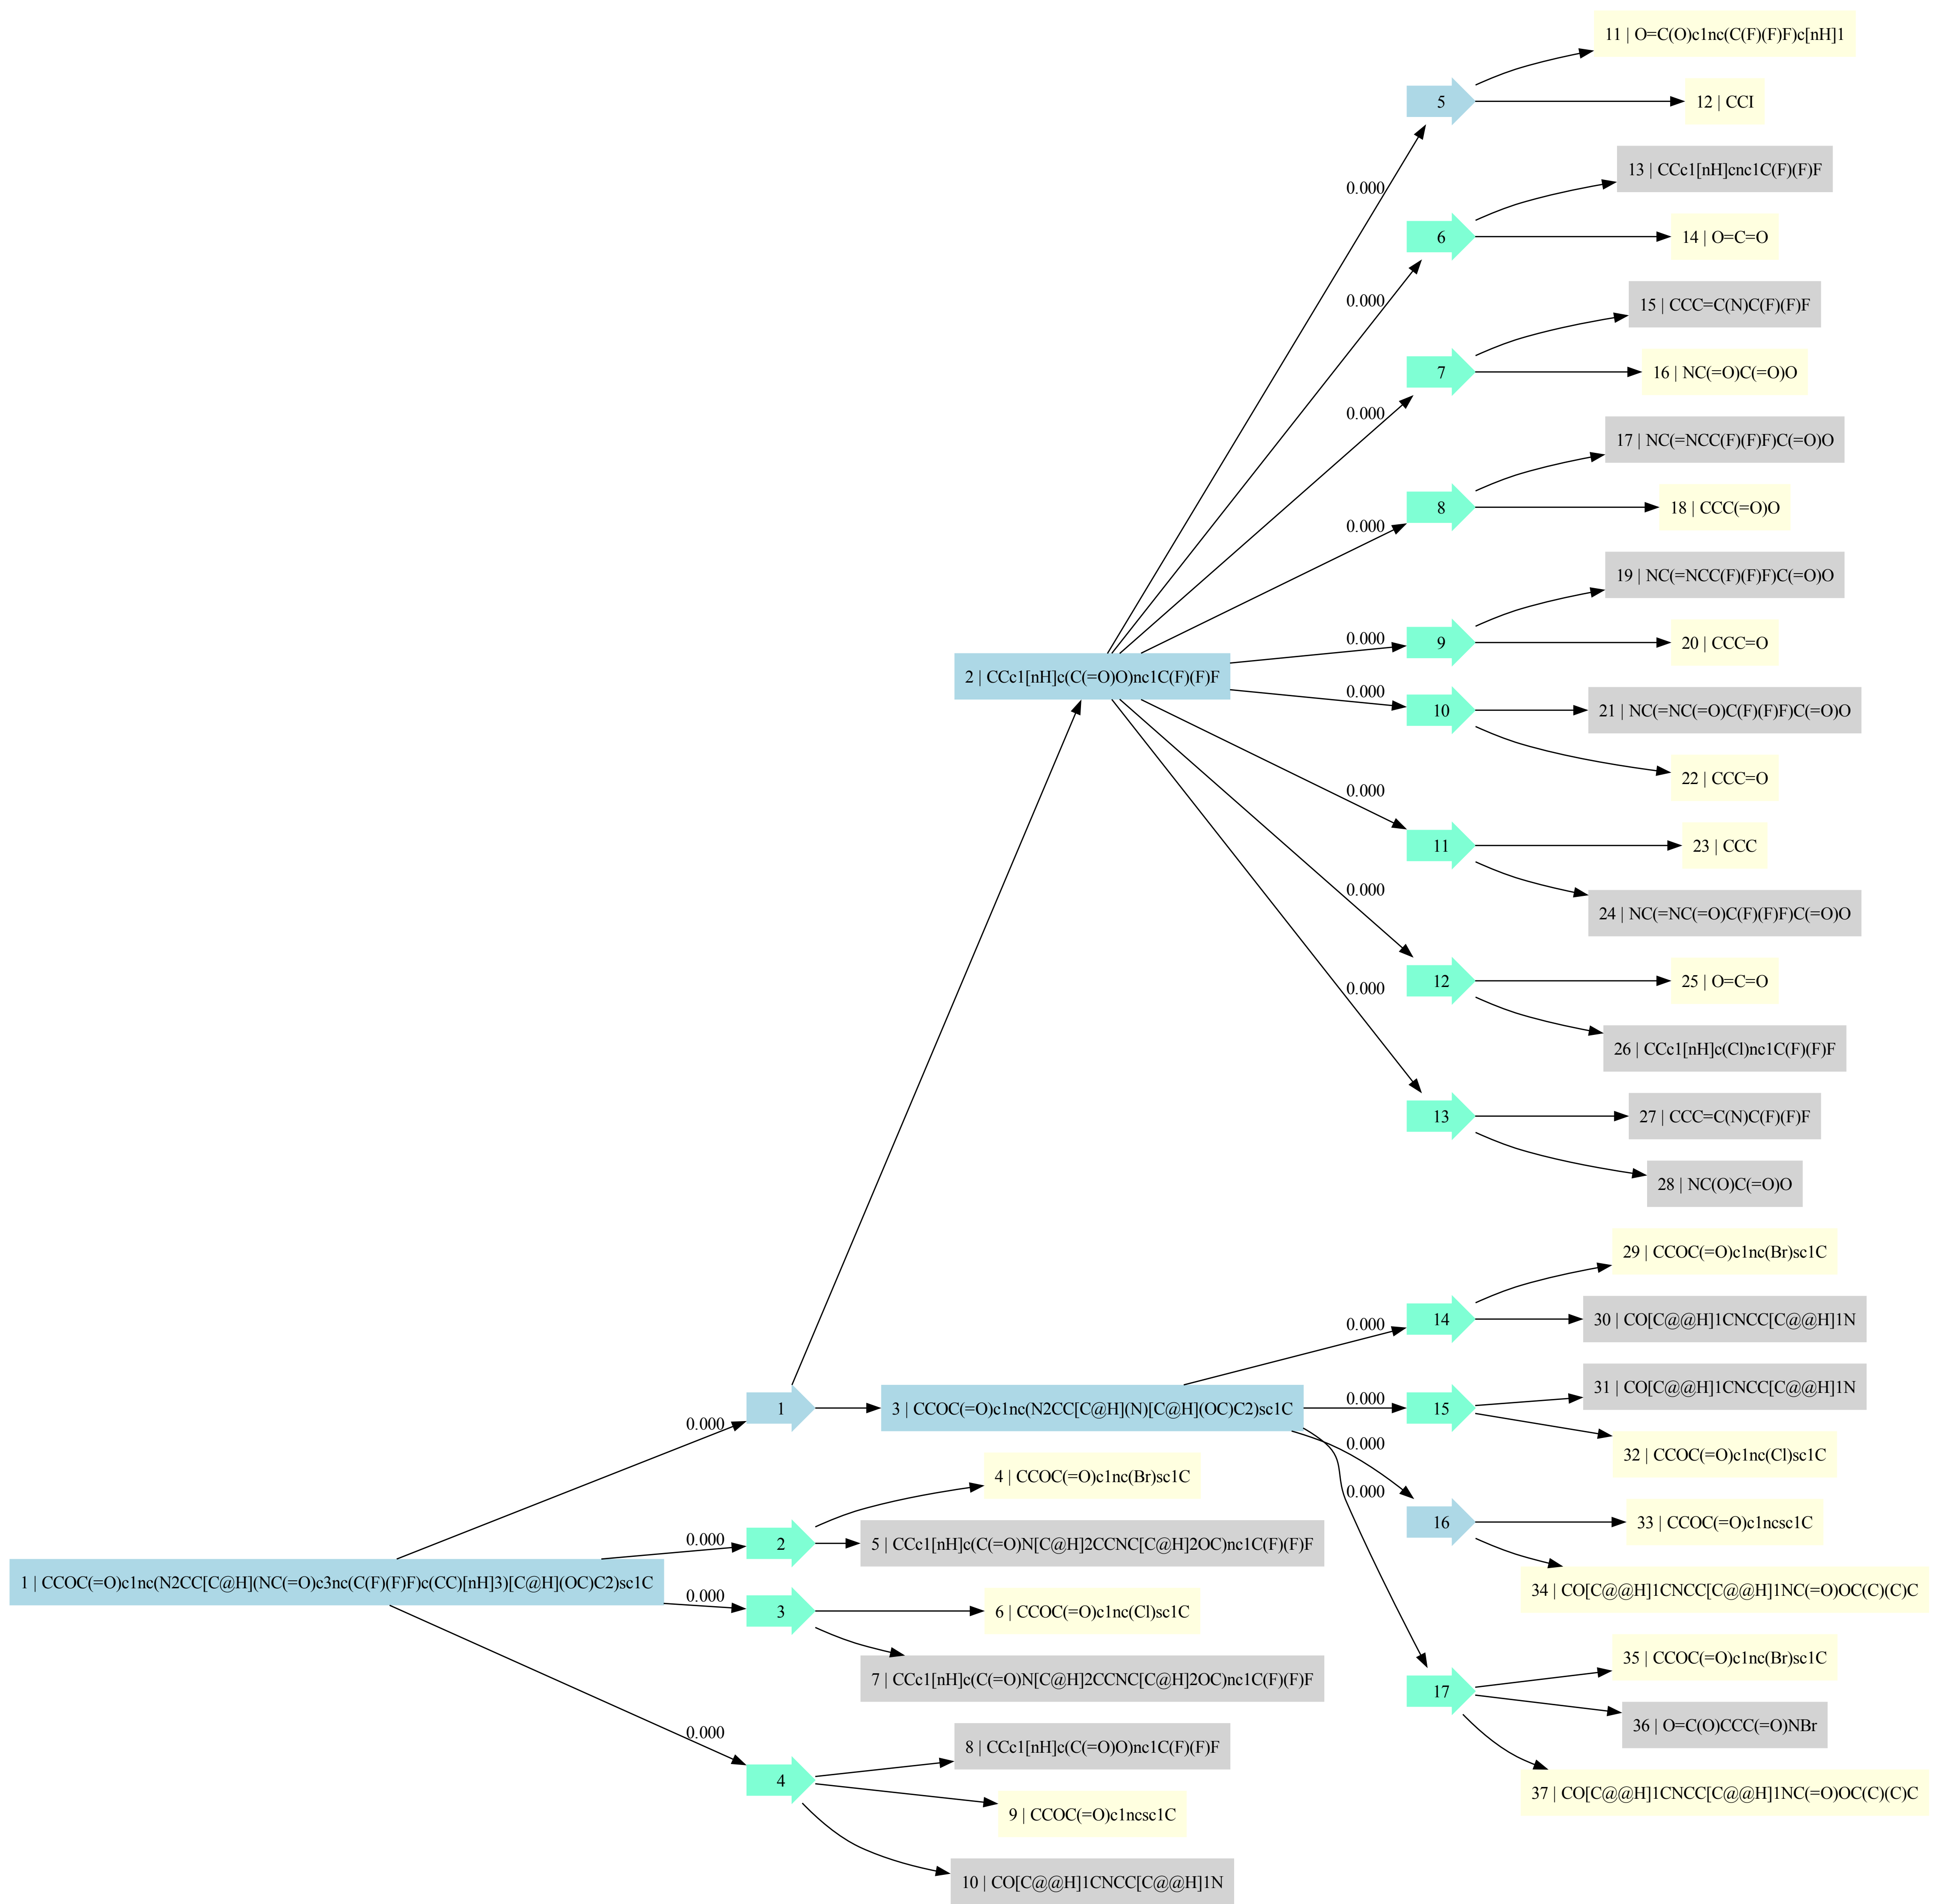

Supplement: supplementary_material [file mol_12_search_tree.pdf › materials9084/retro190_solutions/mol_12_search_tree.pdf]

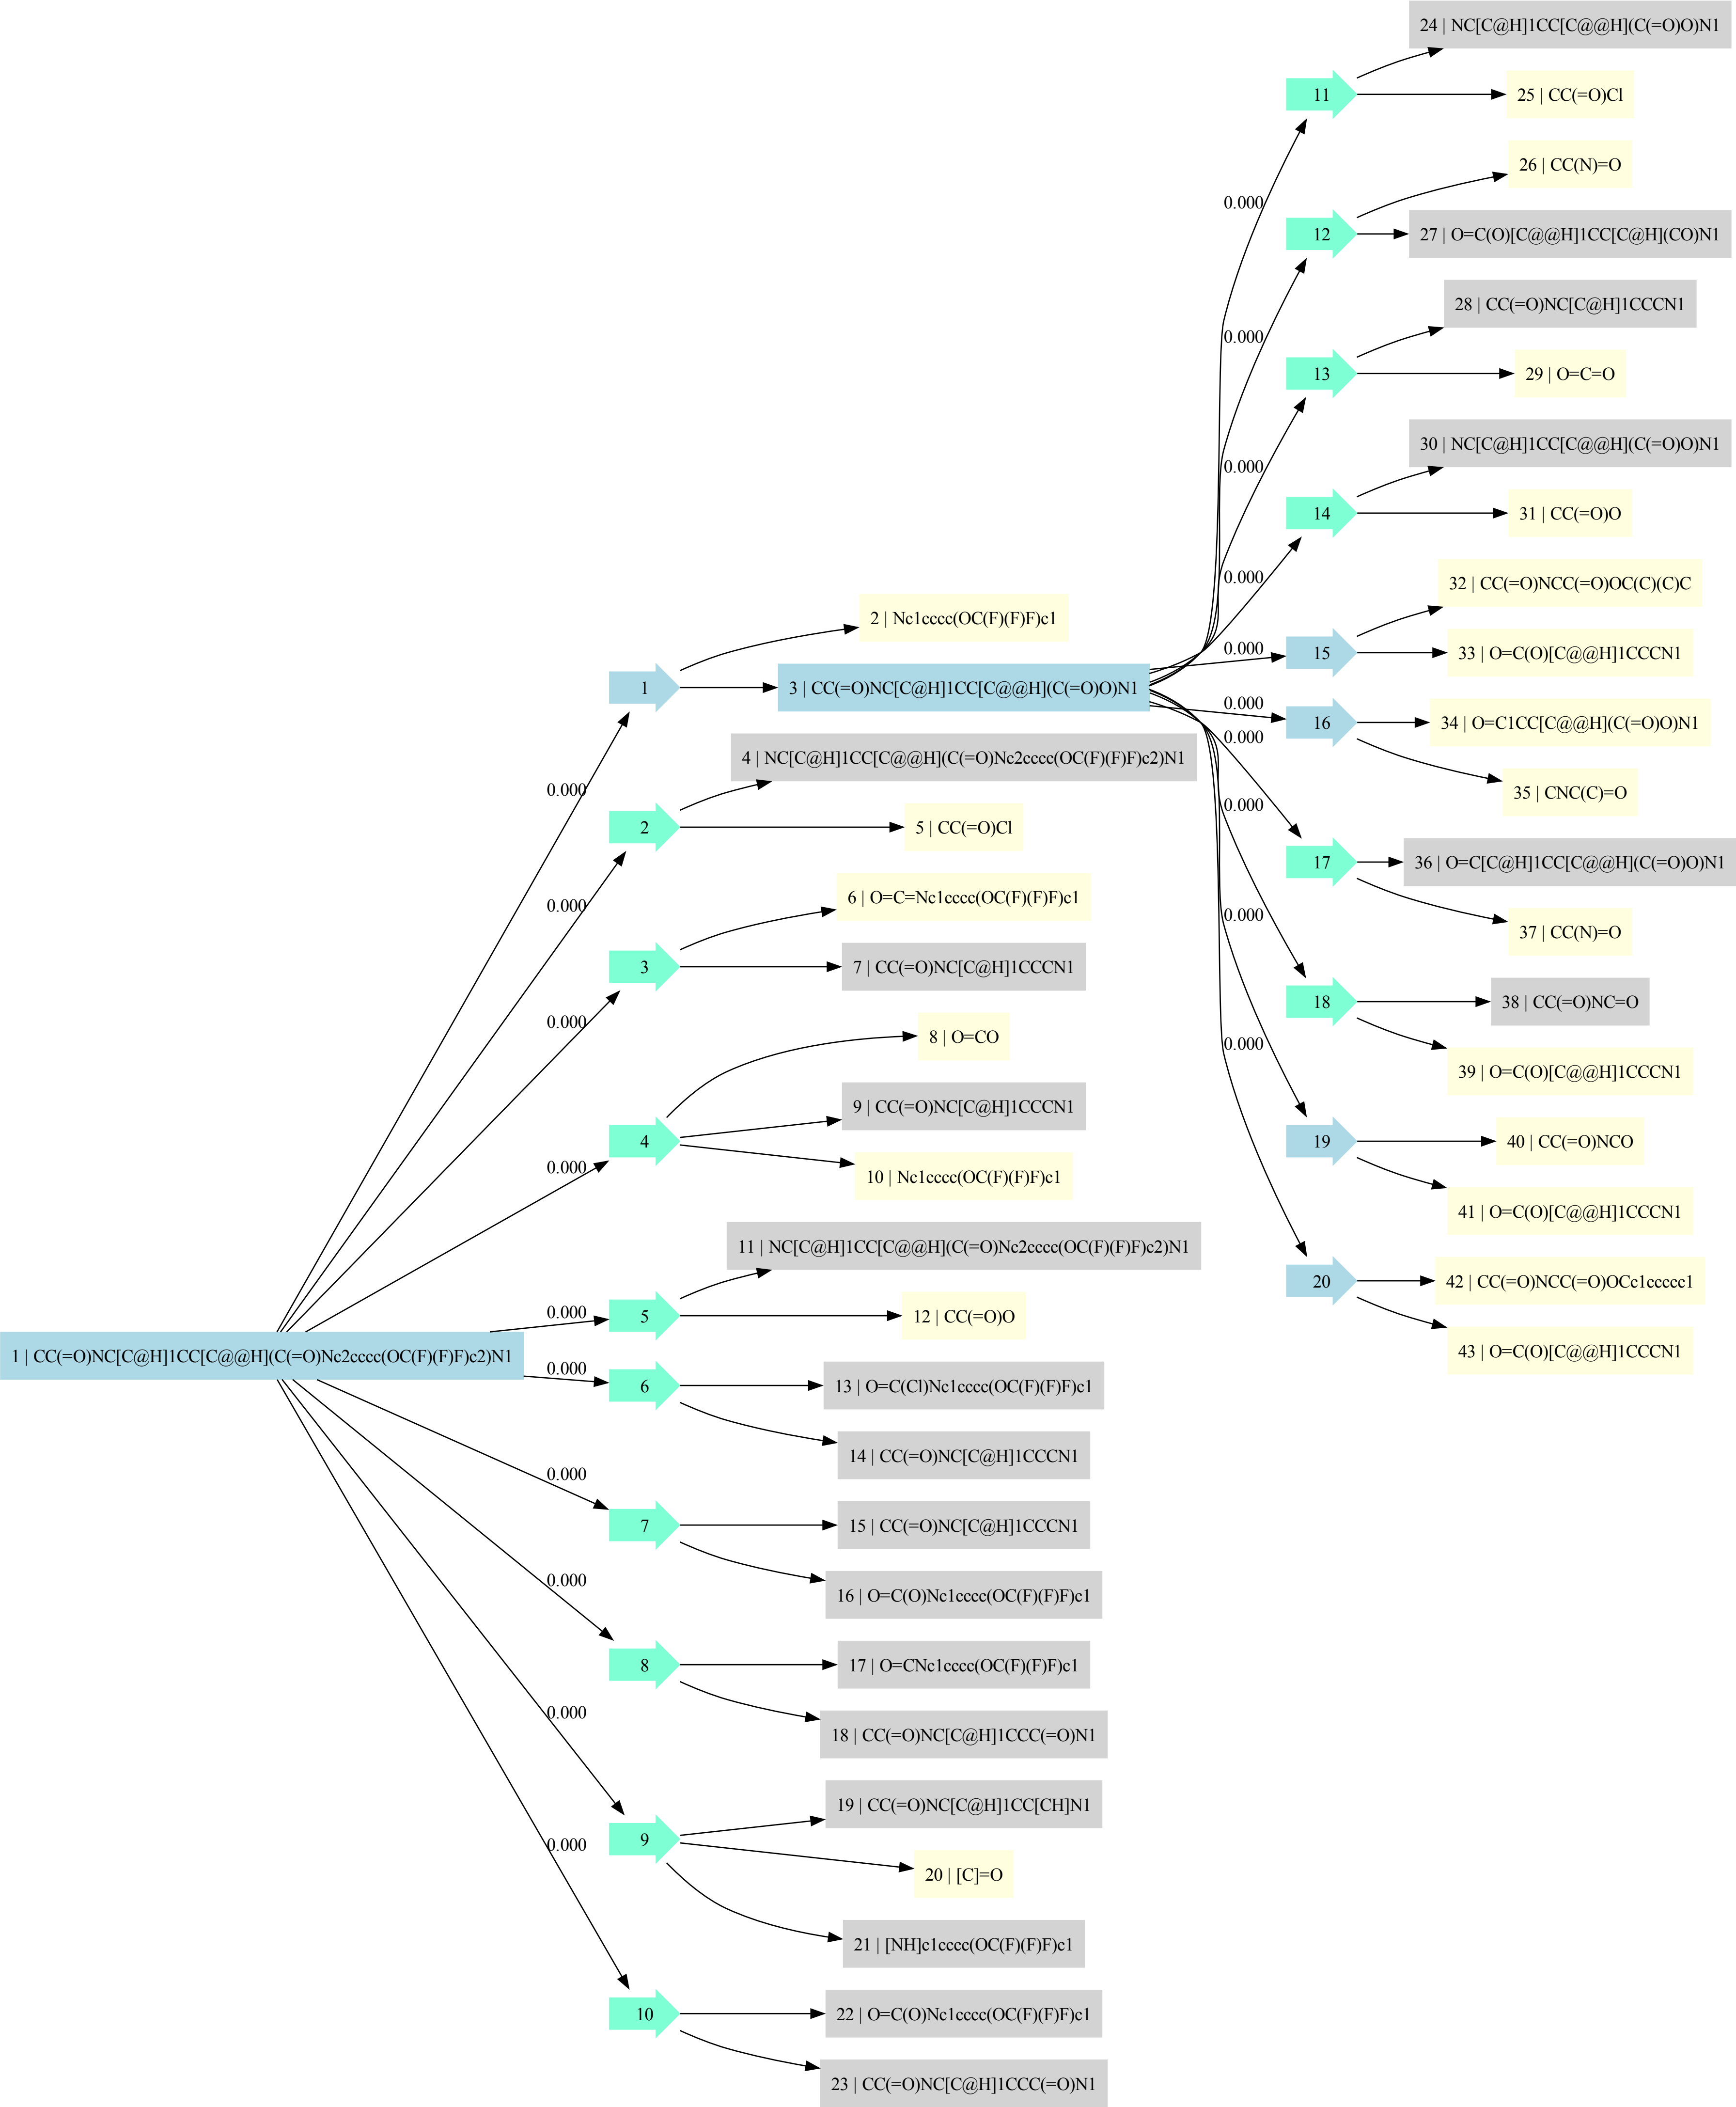

Supplement: supplementary_material [file mol_130_search_tree.pdf › materials9084/retro190_solutions/mol_130_search_tree.pdf]

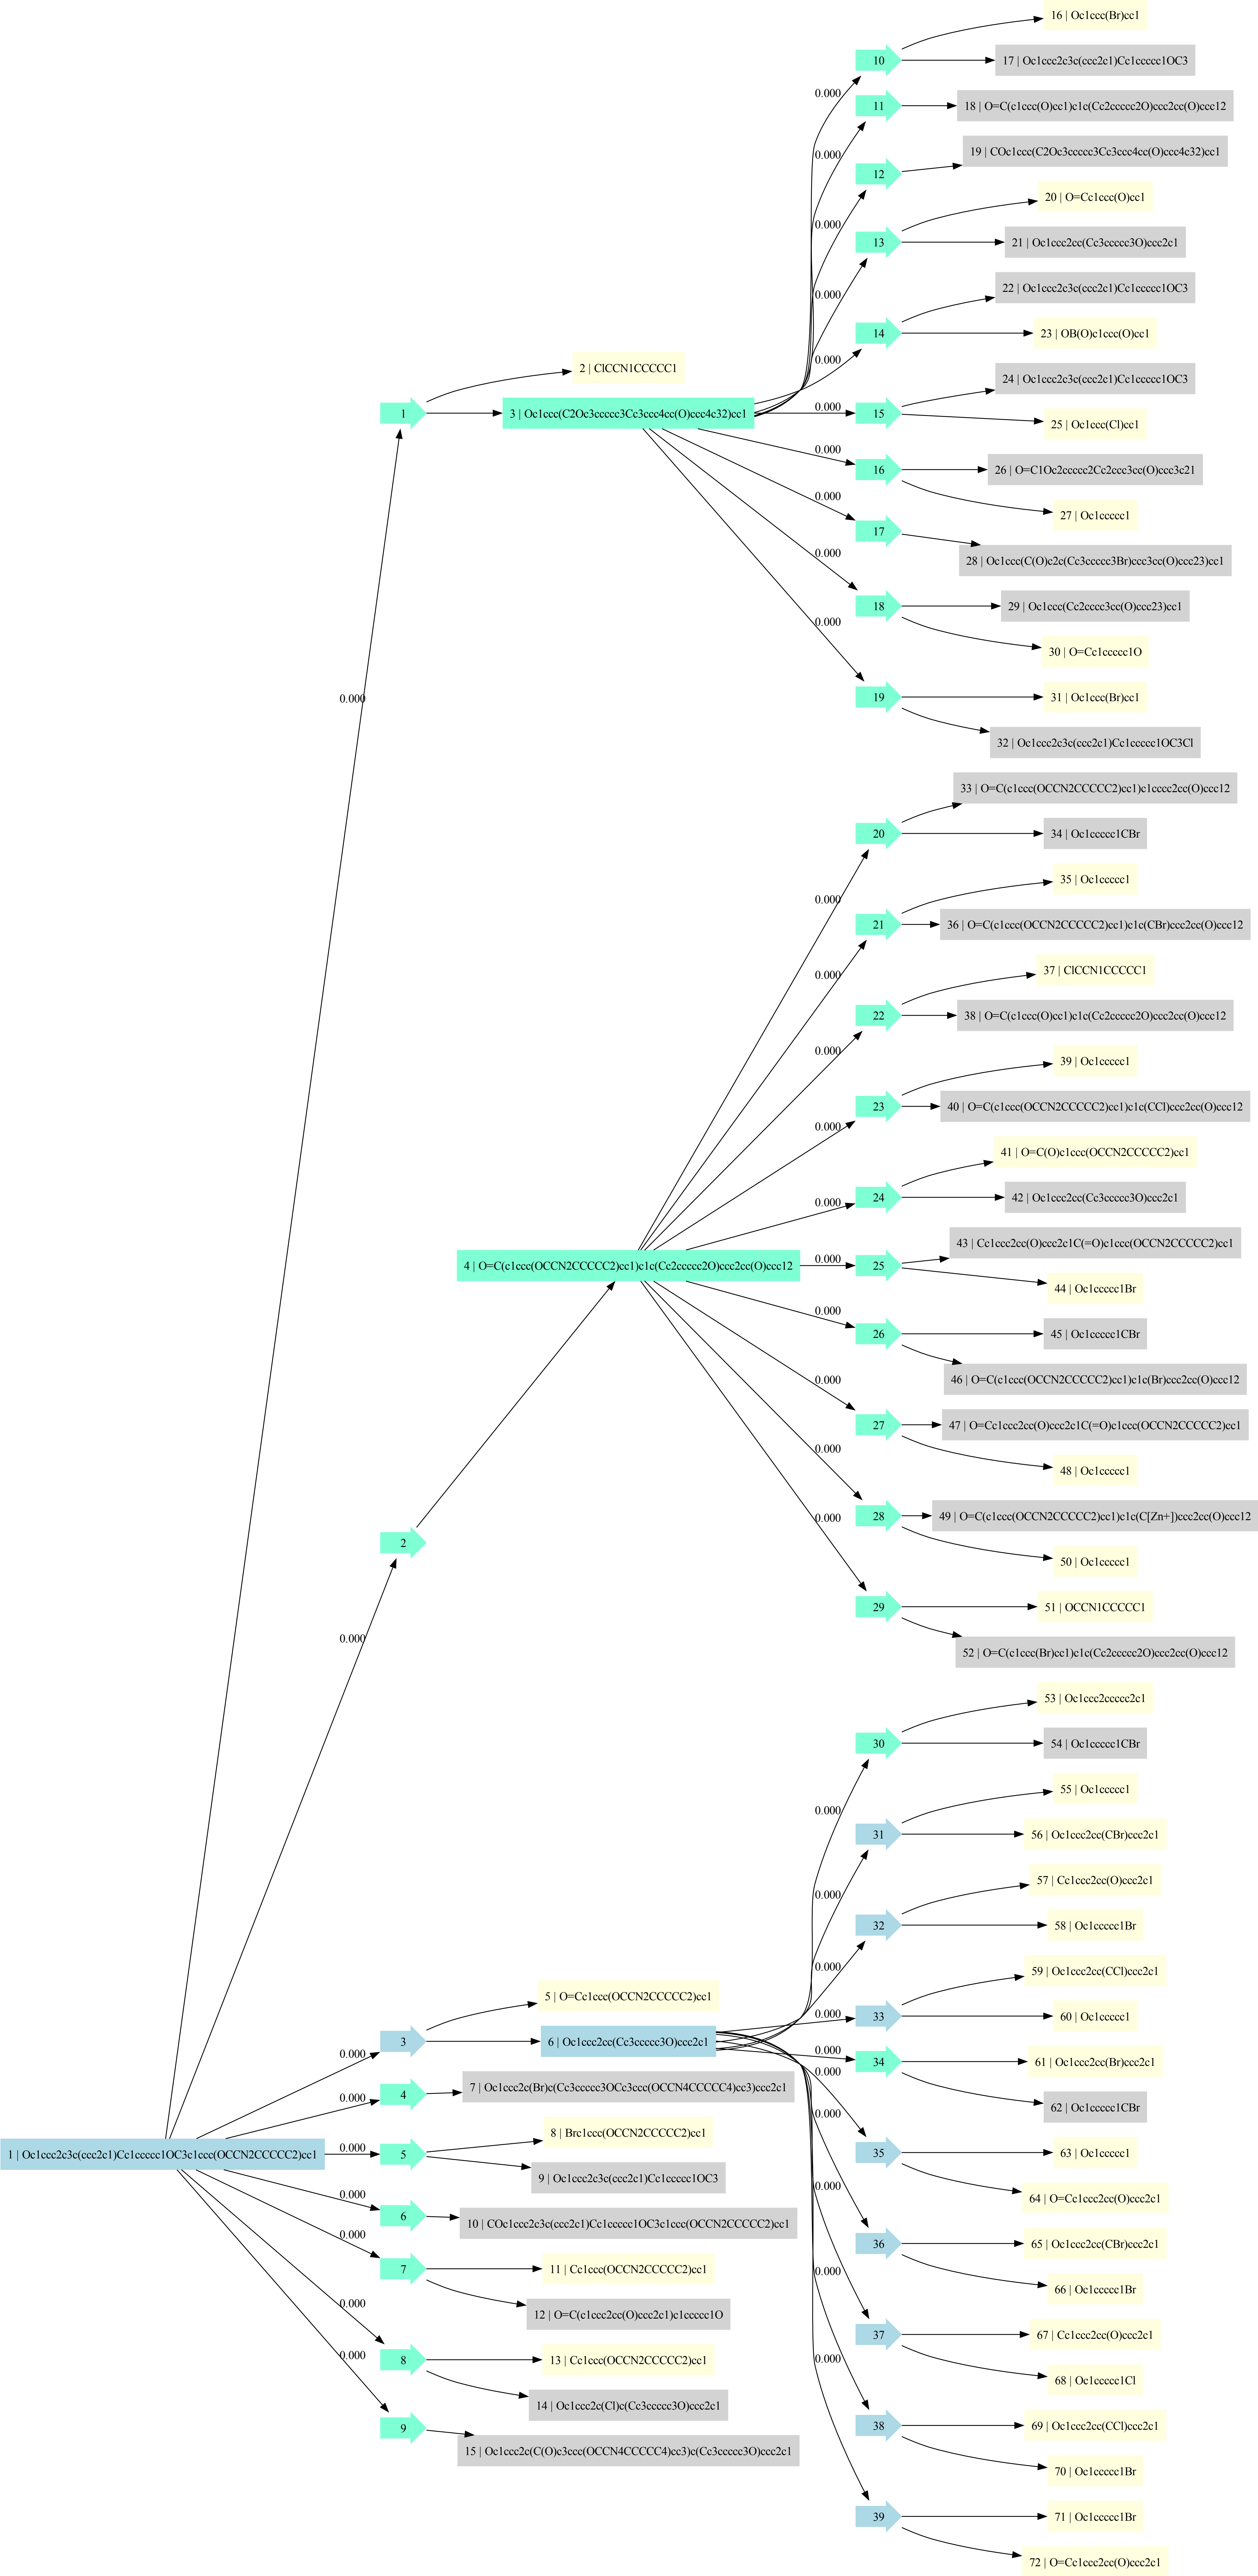

Supplement: supplementary_material [file mol_131_search_tree.pdf › materials9084/retro190_solutions/mol_131_search_tree.pdf]

Cn1nccc1[C@]12CCCC[C@H]1OC(=O)O2

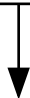

Cn1nccc1[C@]1(OC(=O)O)CCCC[C@H]1O

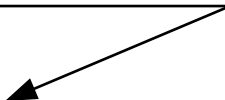

Cn1nccc1B1OC(C)(C)C(C)(C)O1

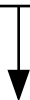

OC1CCCCC1

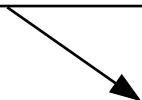

O=C(O)O

Supplement: supplementary_material [file mol_134_route_optimal.pdf › materials9084/retro190_solutions/mol_134_route_optimal.pdf]

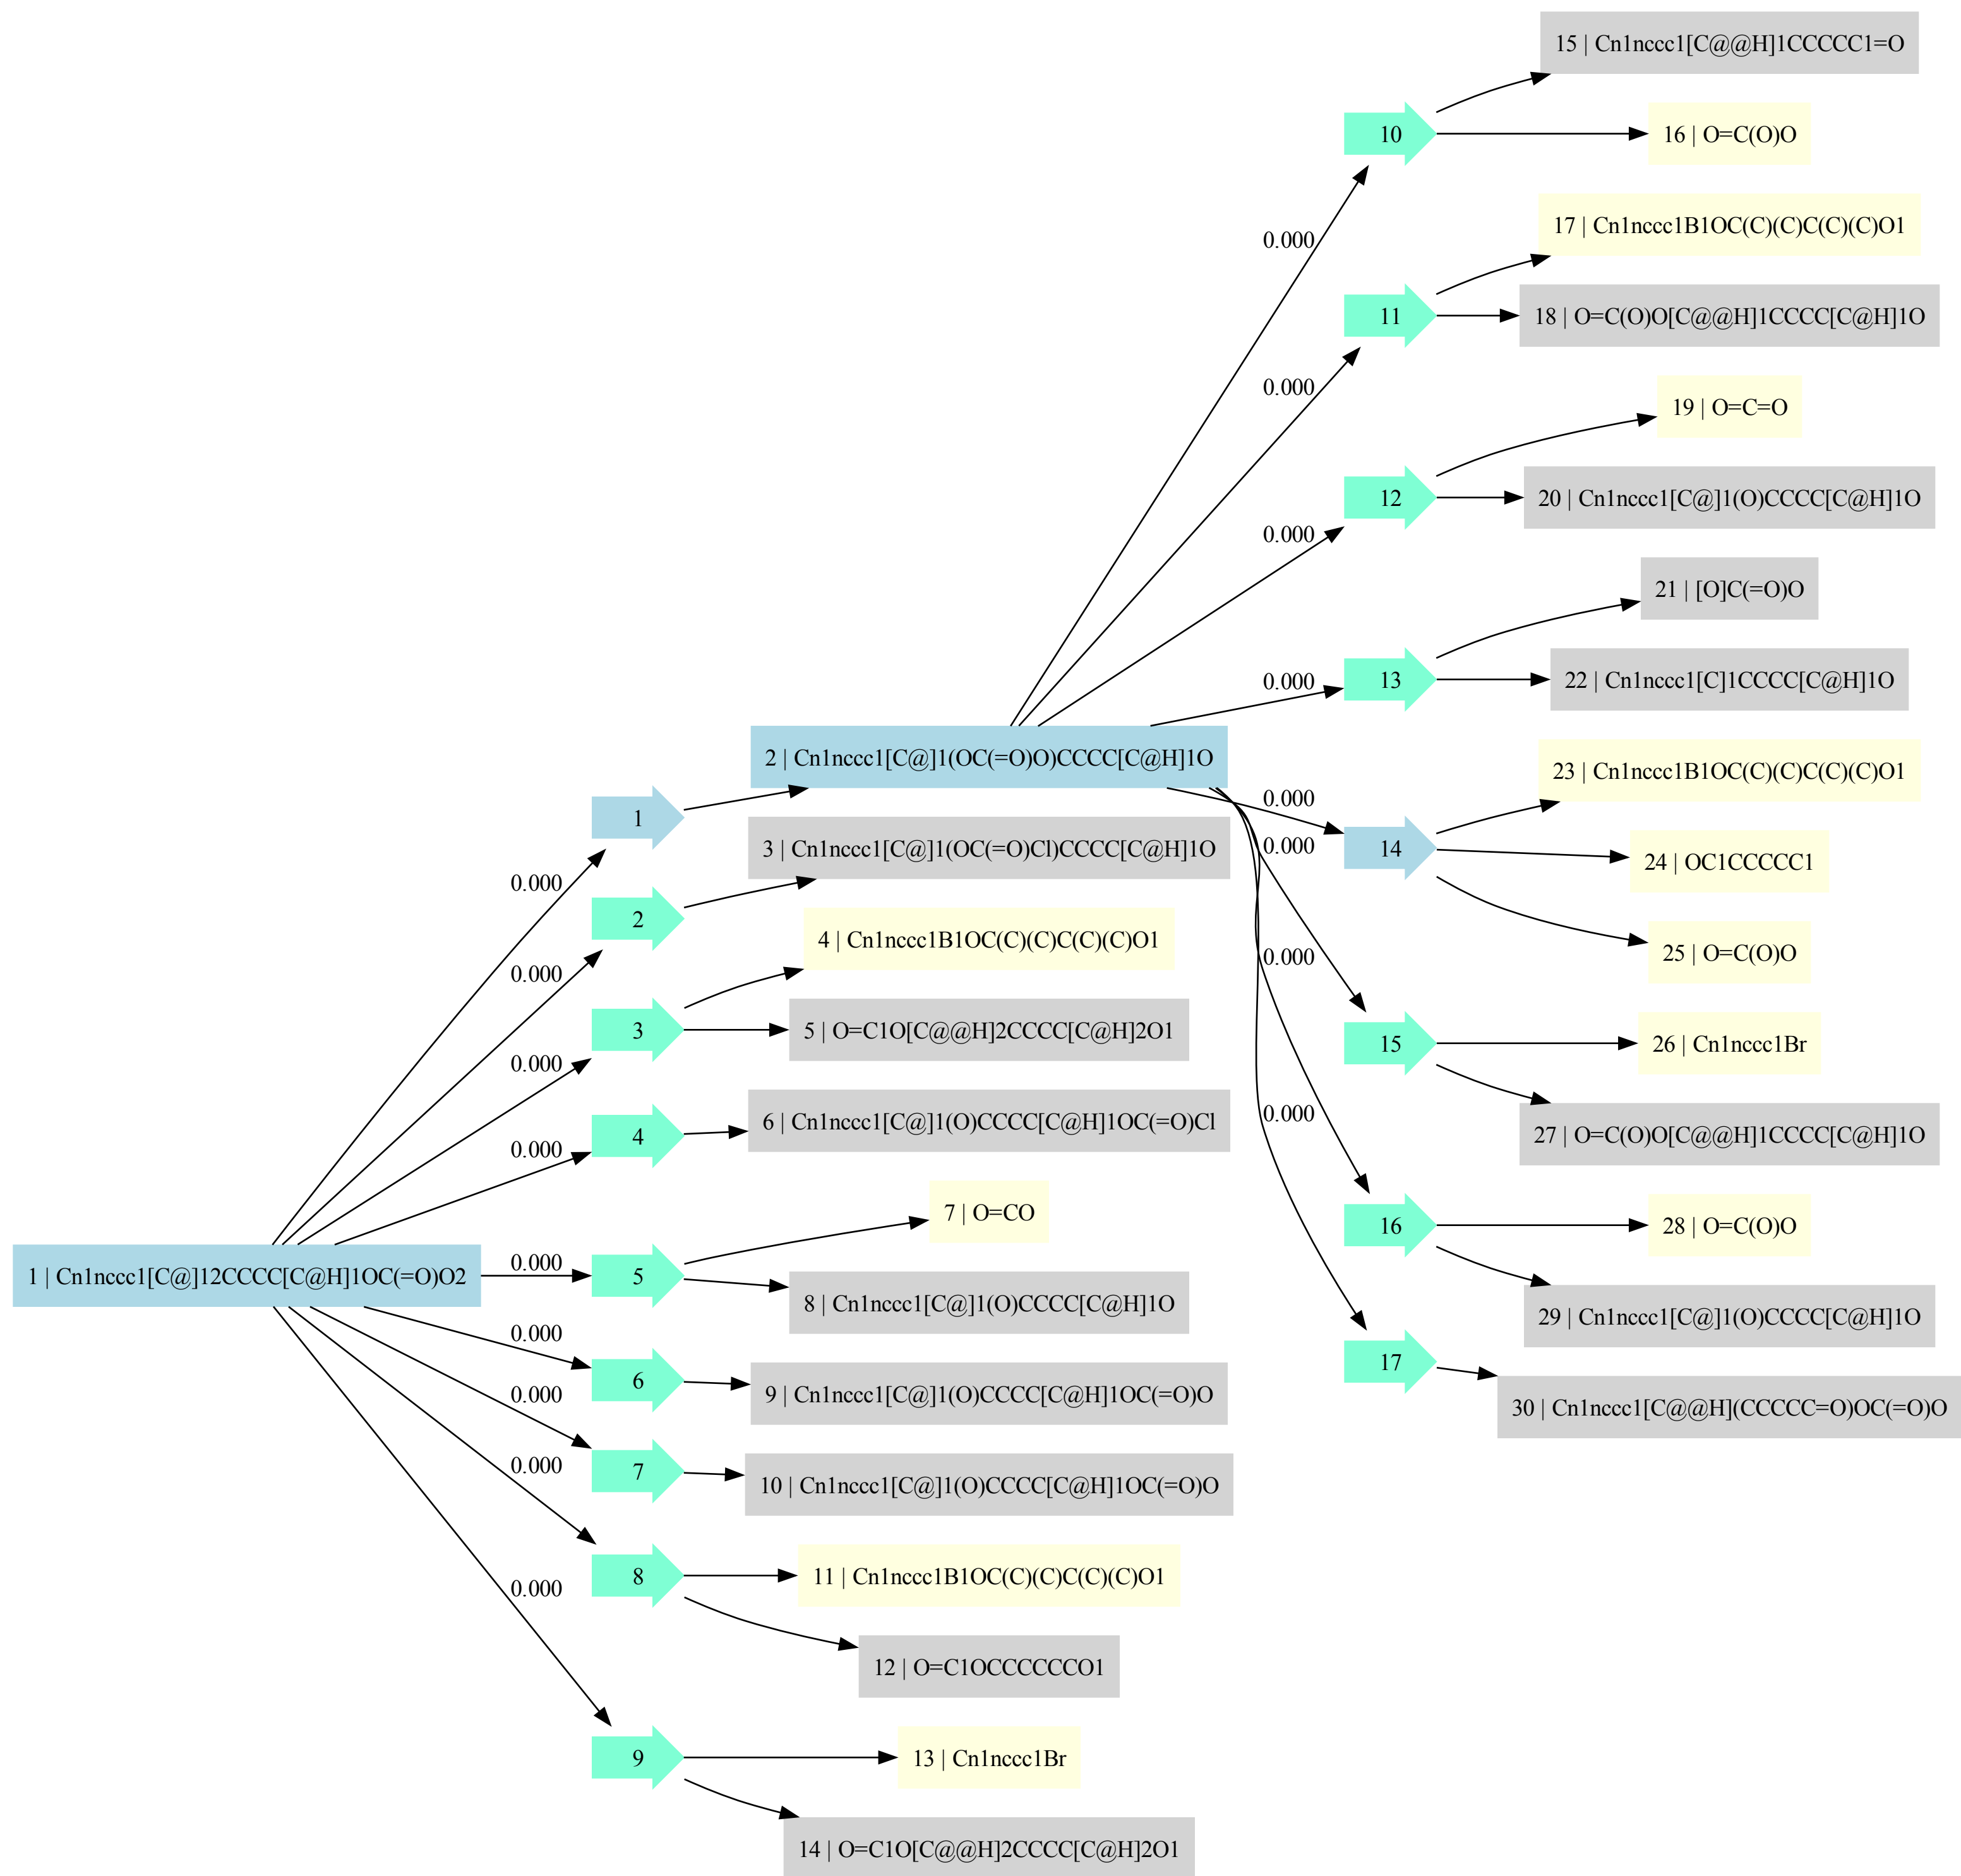

Supplement: supplementary_material [file mol_134_search_tree.pdf › materials9084/retro190_solutions/mol_134_search_tree.pdf]

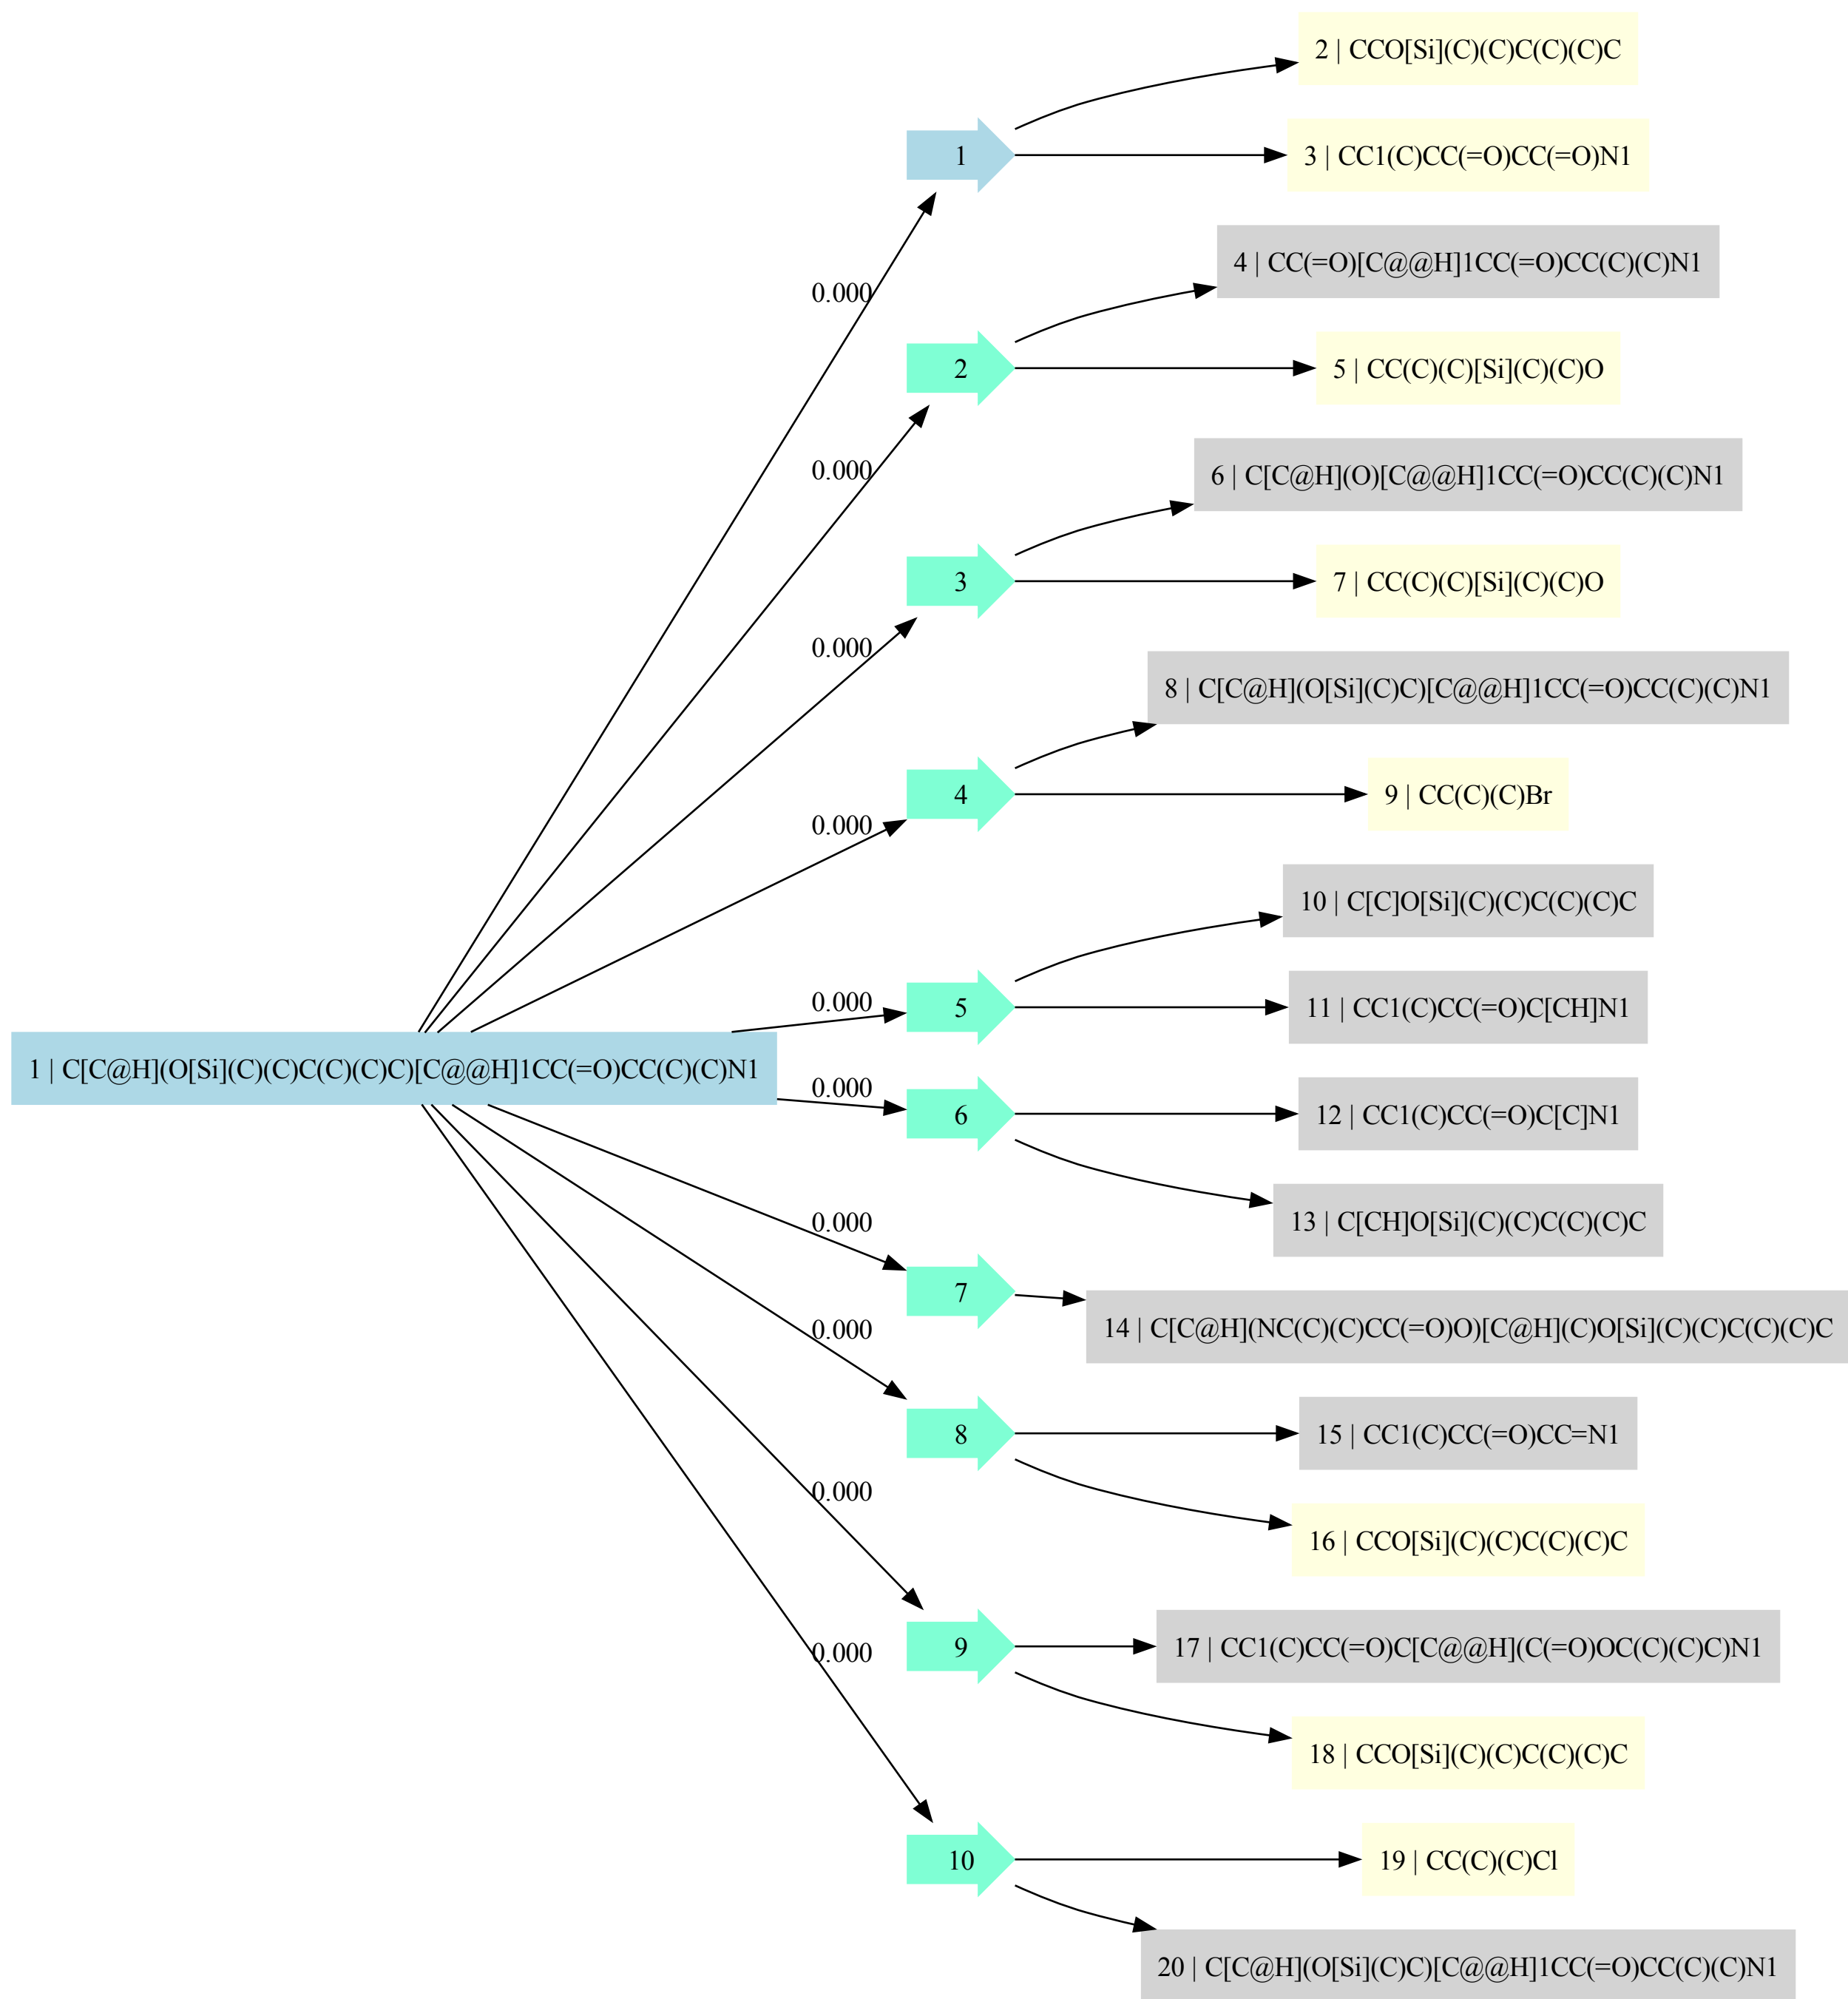

Supplement: supplementary_material [file mol_135_search_tree.pdf › materials9084/retro190_solutions/mol_135_search_tree.pdf]

O=C(Nc1ccc(-c2cnc(C34CC5CC(CC(C(=O)O)(C5)C3)C4)s2)cc1)Nc1cccc(C(F)(F)F)c1



O=C=Nc1cccc(C(F)(F)F)c1

Nc1ccc(-c2cncs2)cc1

O=C(O)C12CC3CC(CC(C3)C1)C2

Supplement: supplementary_material [file mol_136_route_optimal.pdf › materials9084/retro190_solutions/mol_136_route_optimal.pdf]

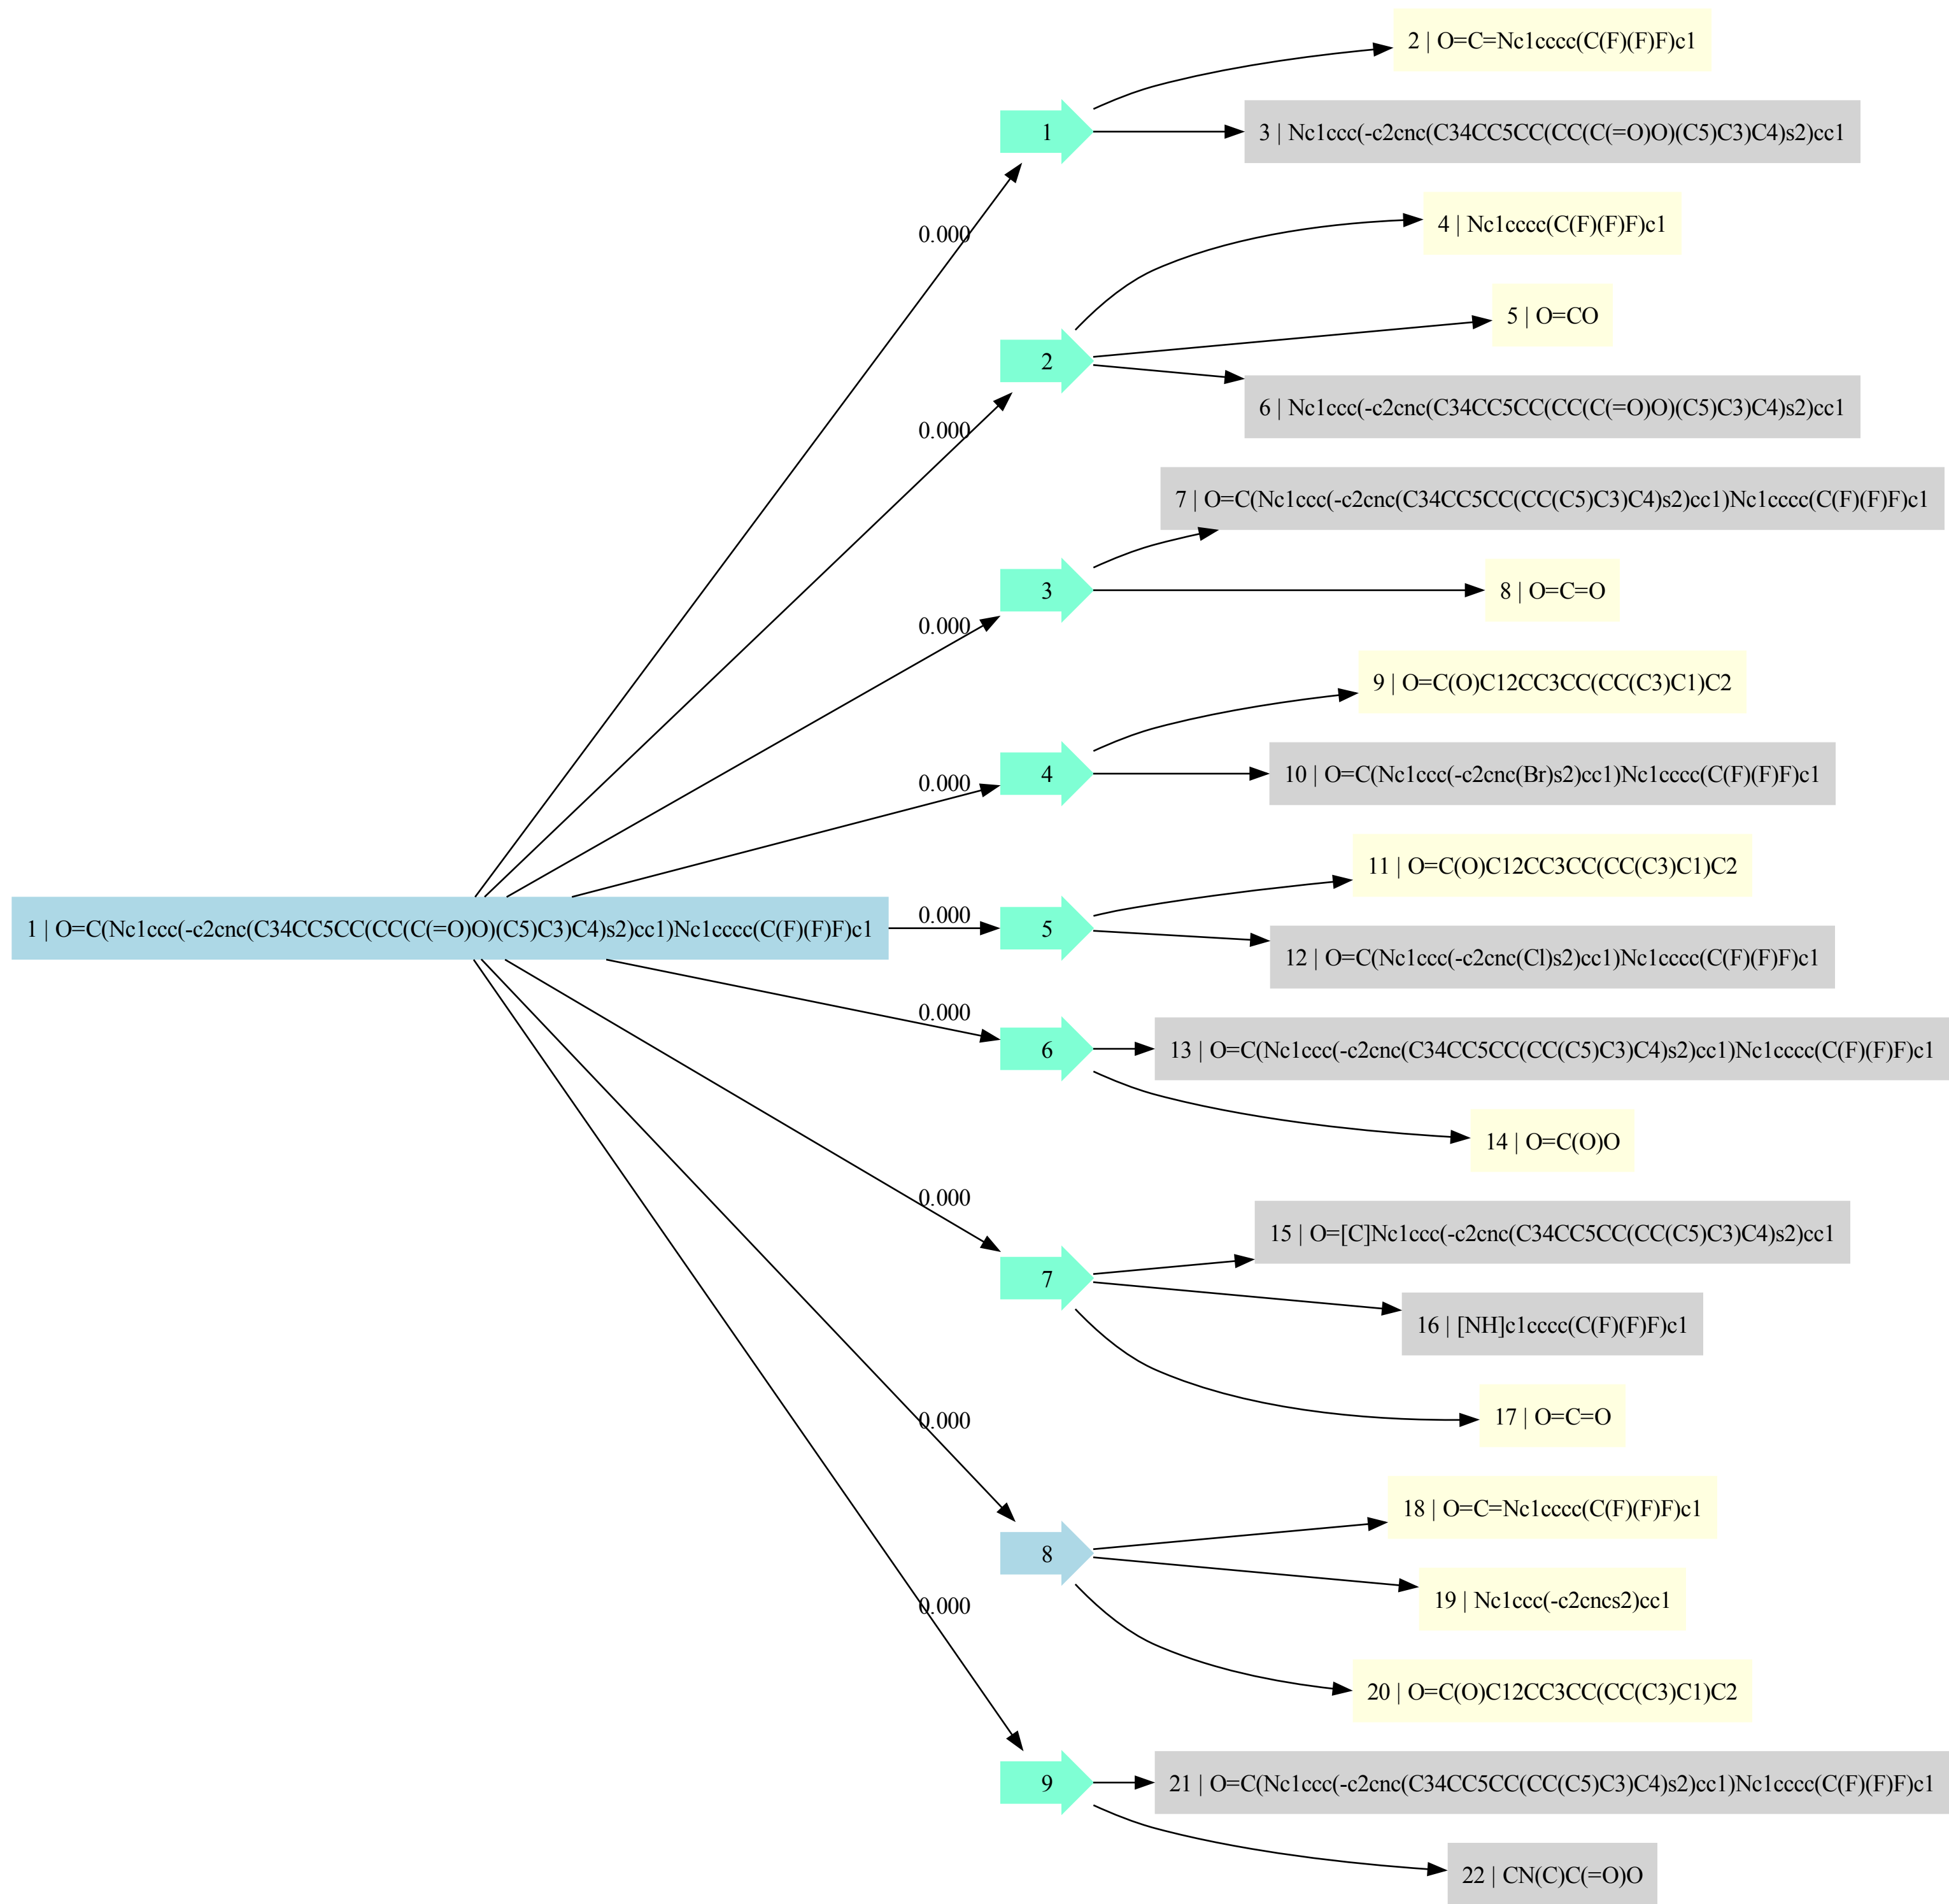

Supplement: supplementary_material [file mol_136_search_tree.pdf › materials9084/retro190_solutions/mol_136_search_tree.pdf]

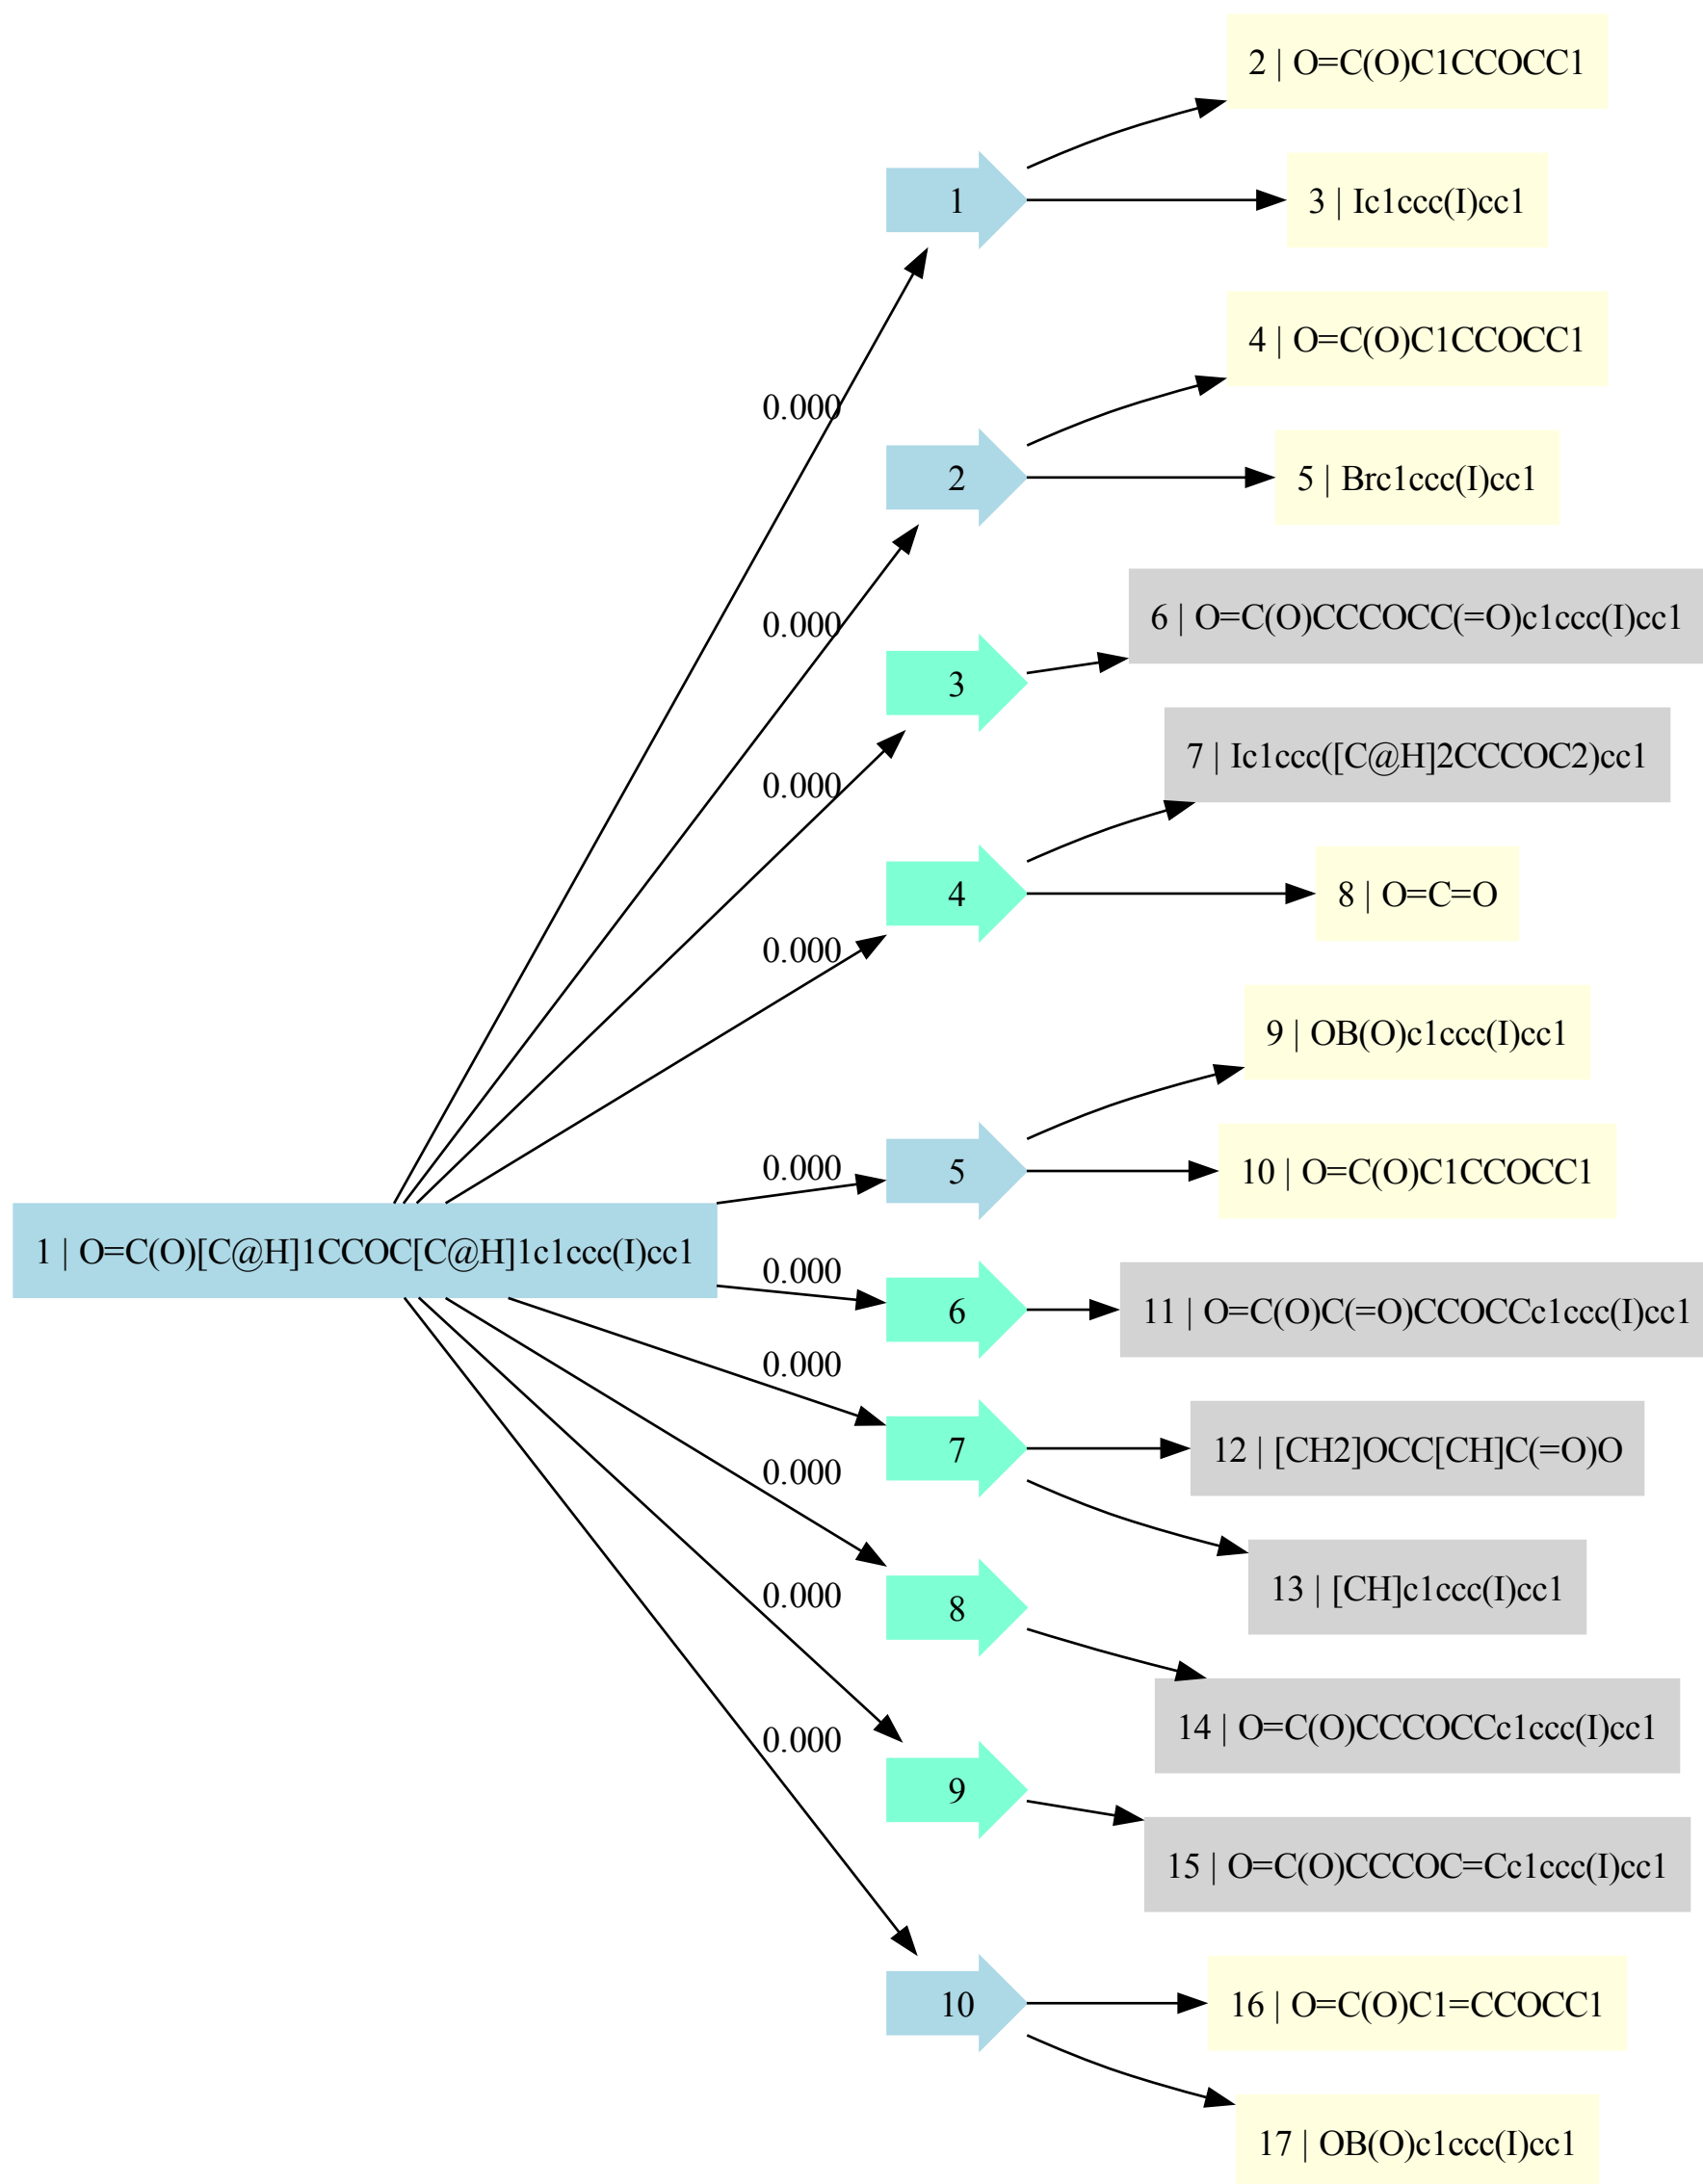

Supplement: supplementary_material [file mol_137_search_tree.pdf › materials9084/retro190_solutions/mol_137_search_tree.pdf]

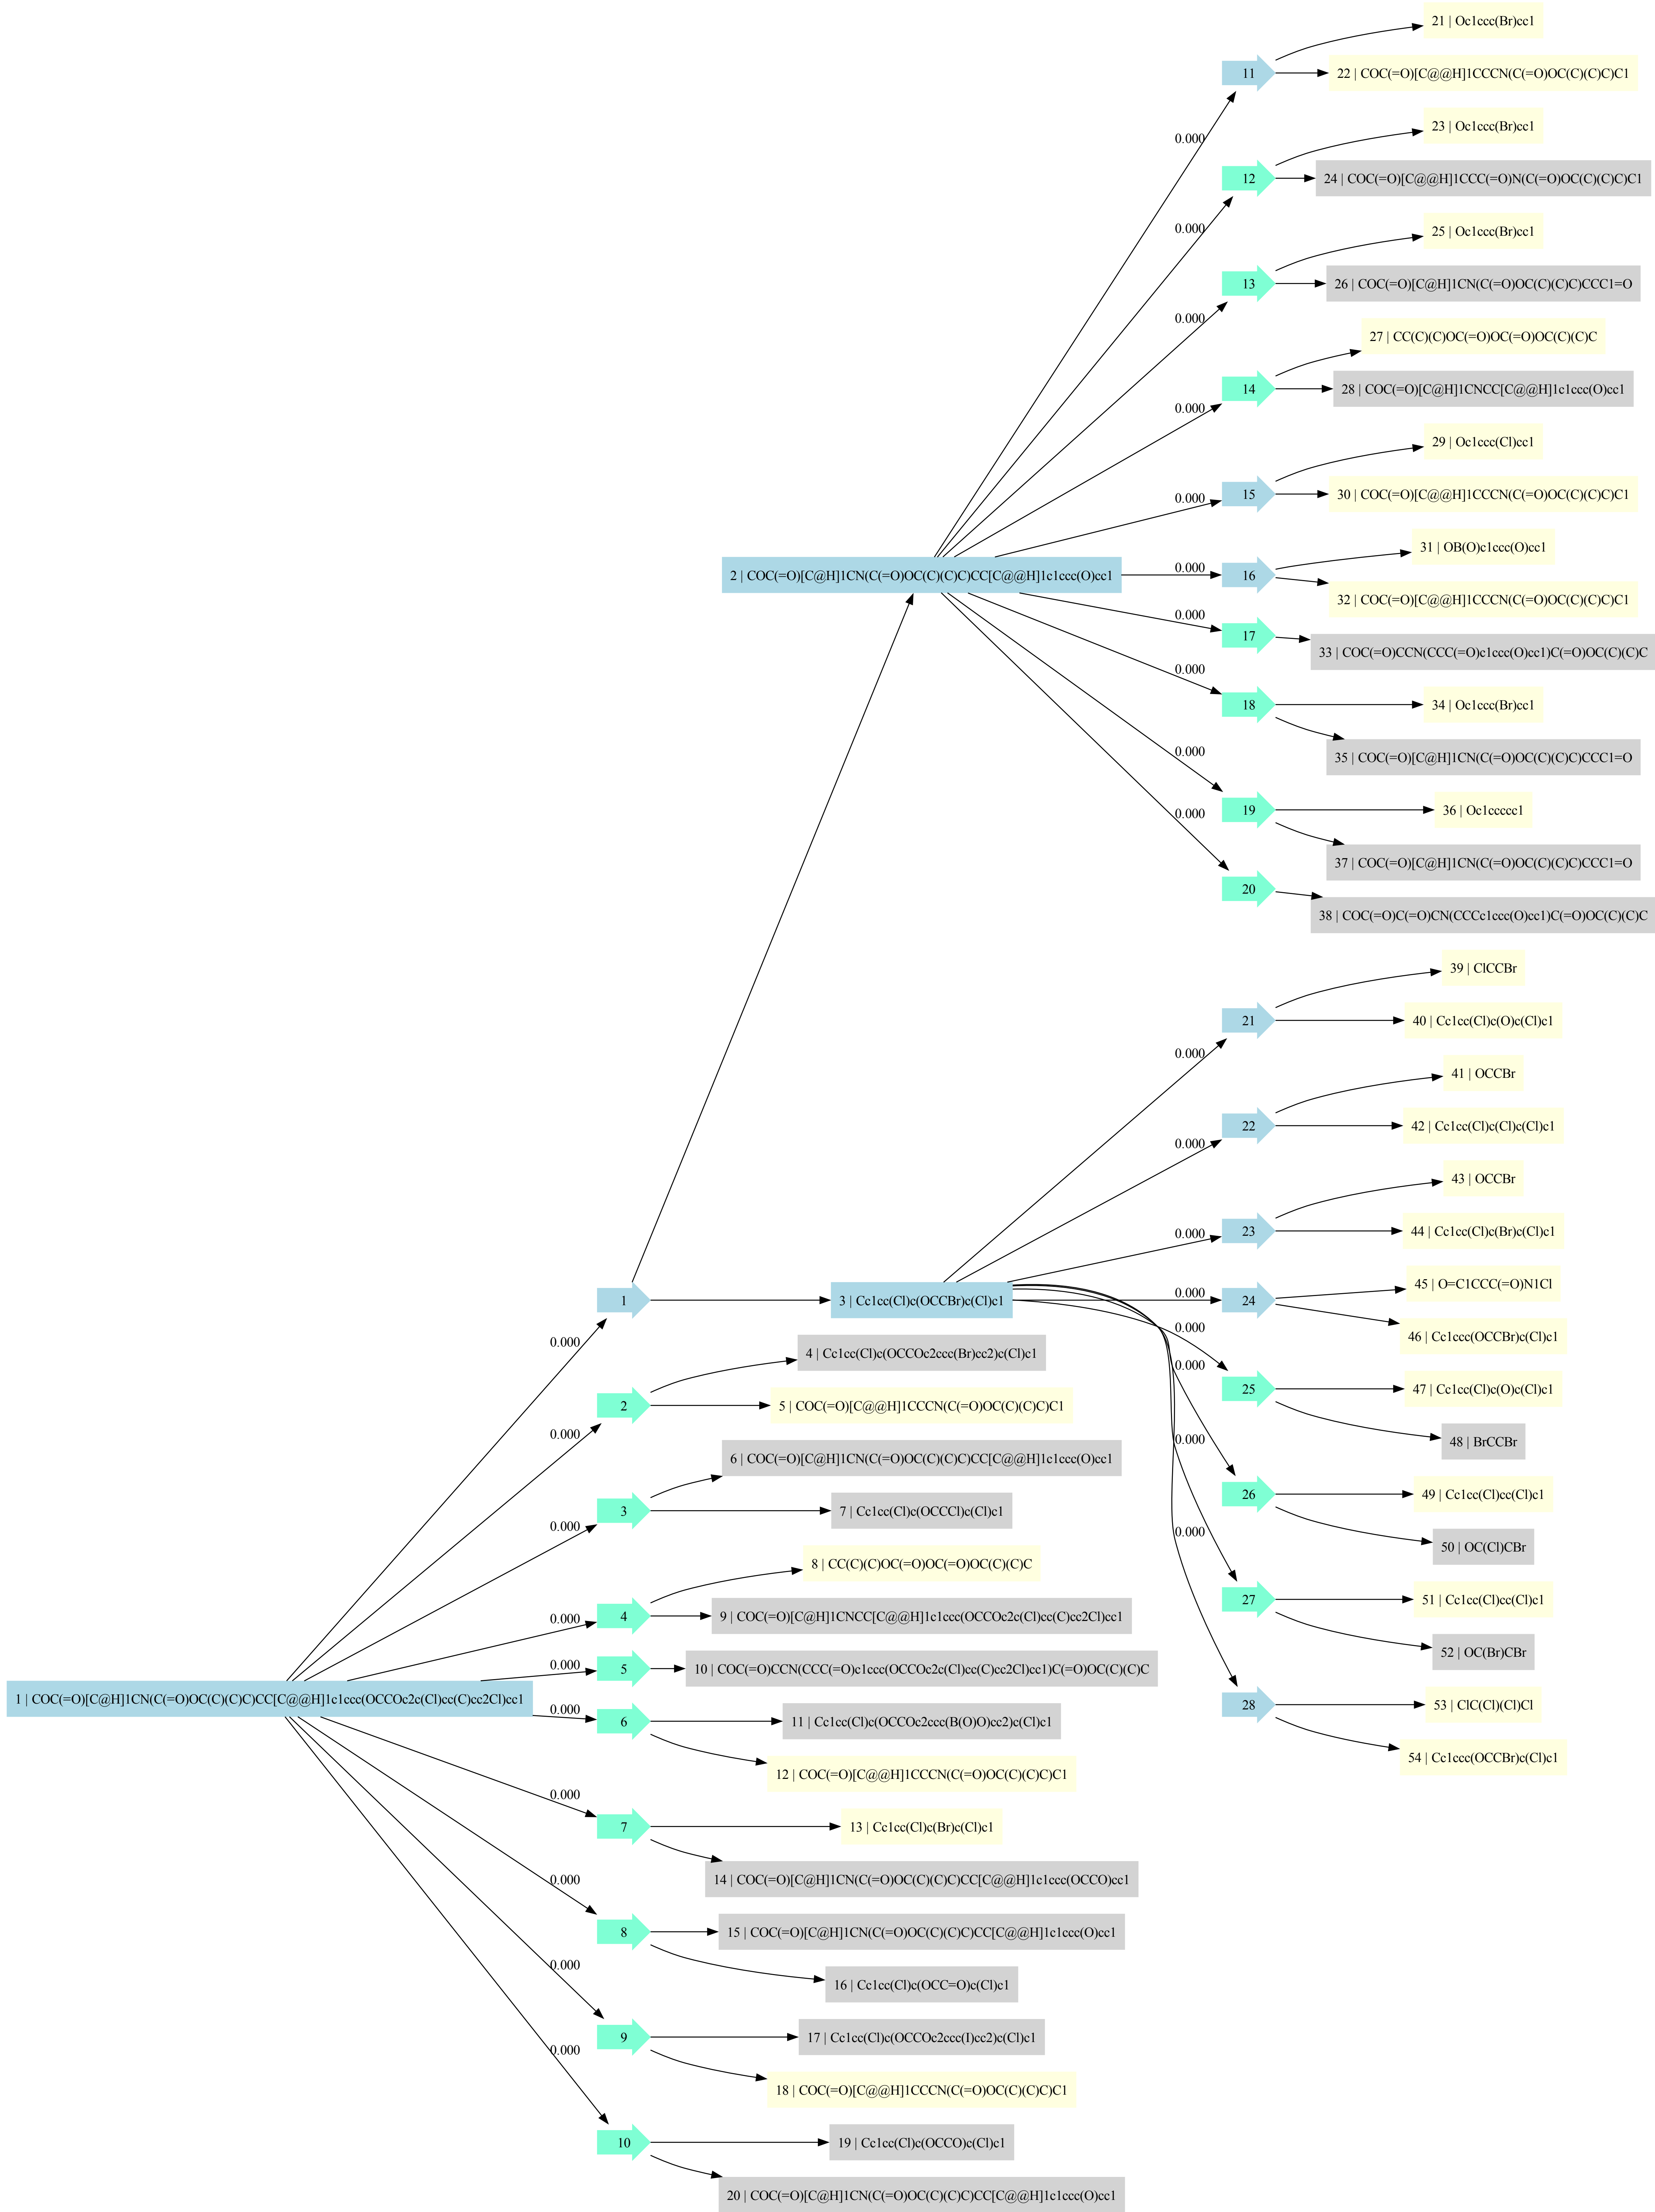

Supplement: supplementary_material [file mol_138_search_tree.pdf › materials9084/retro190_solutions/mol_138_search_tree.pdf]

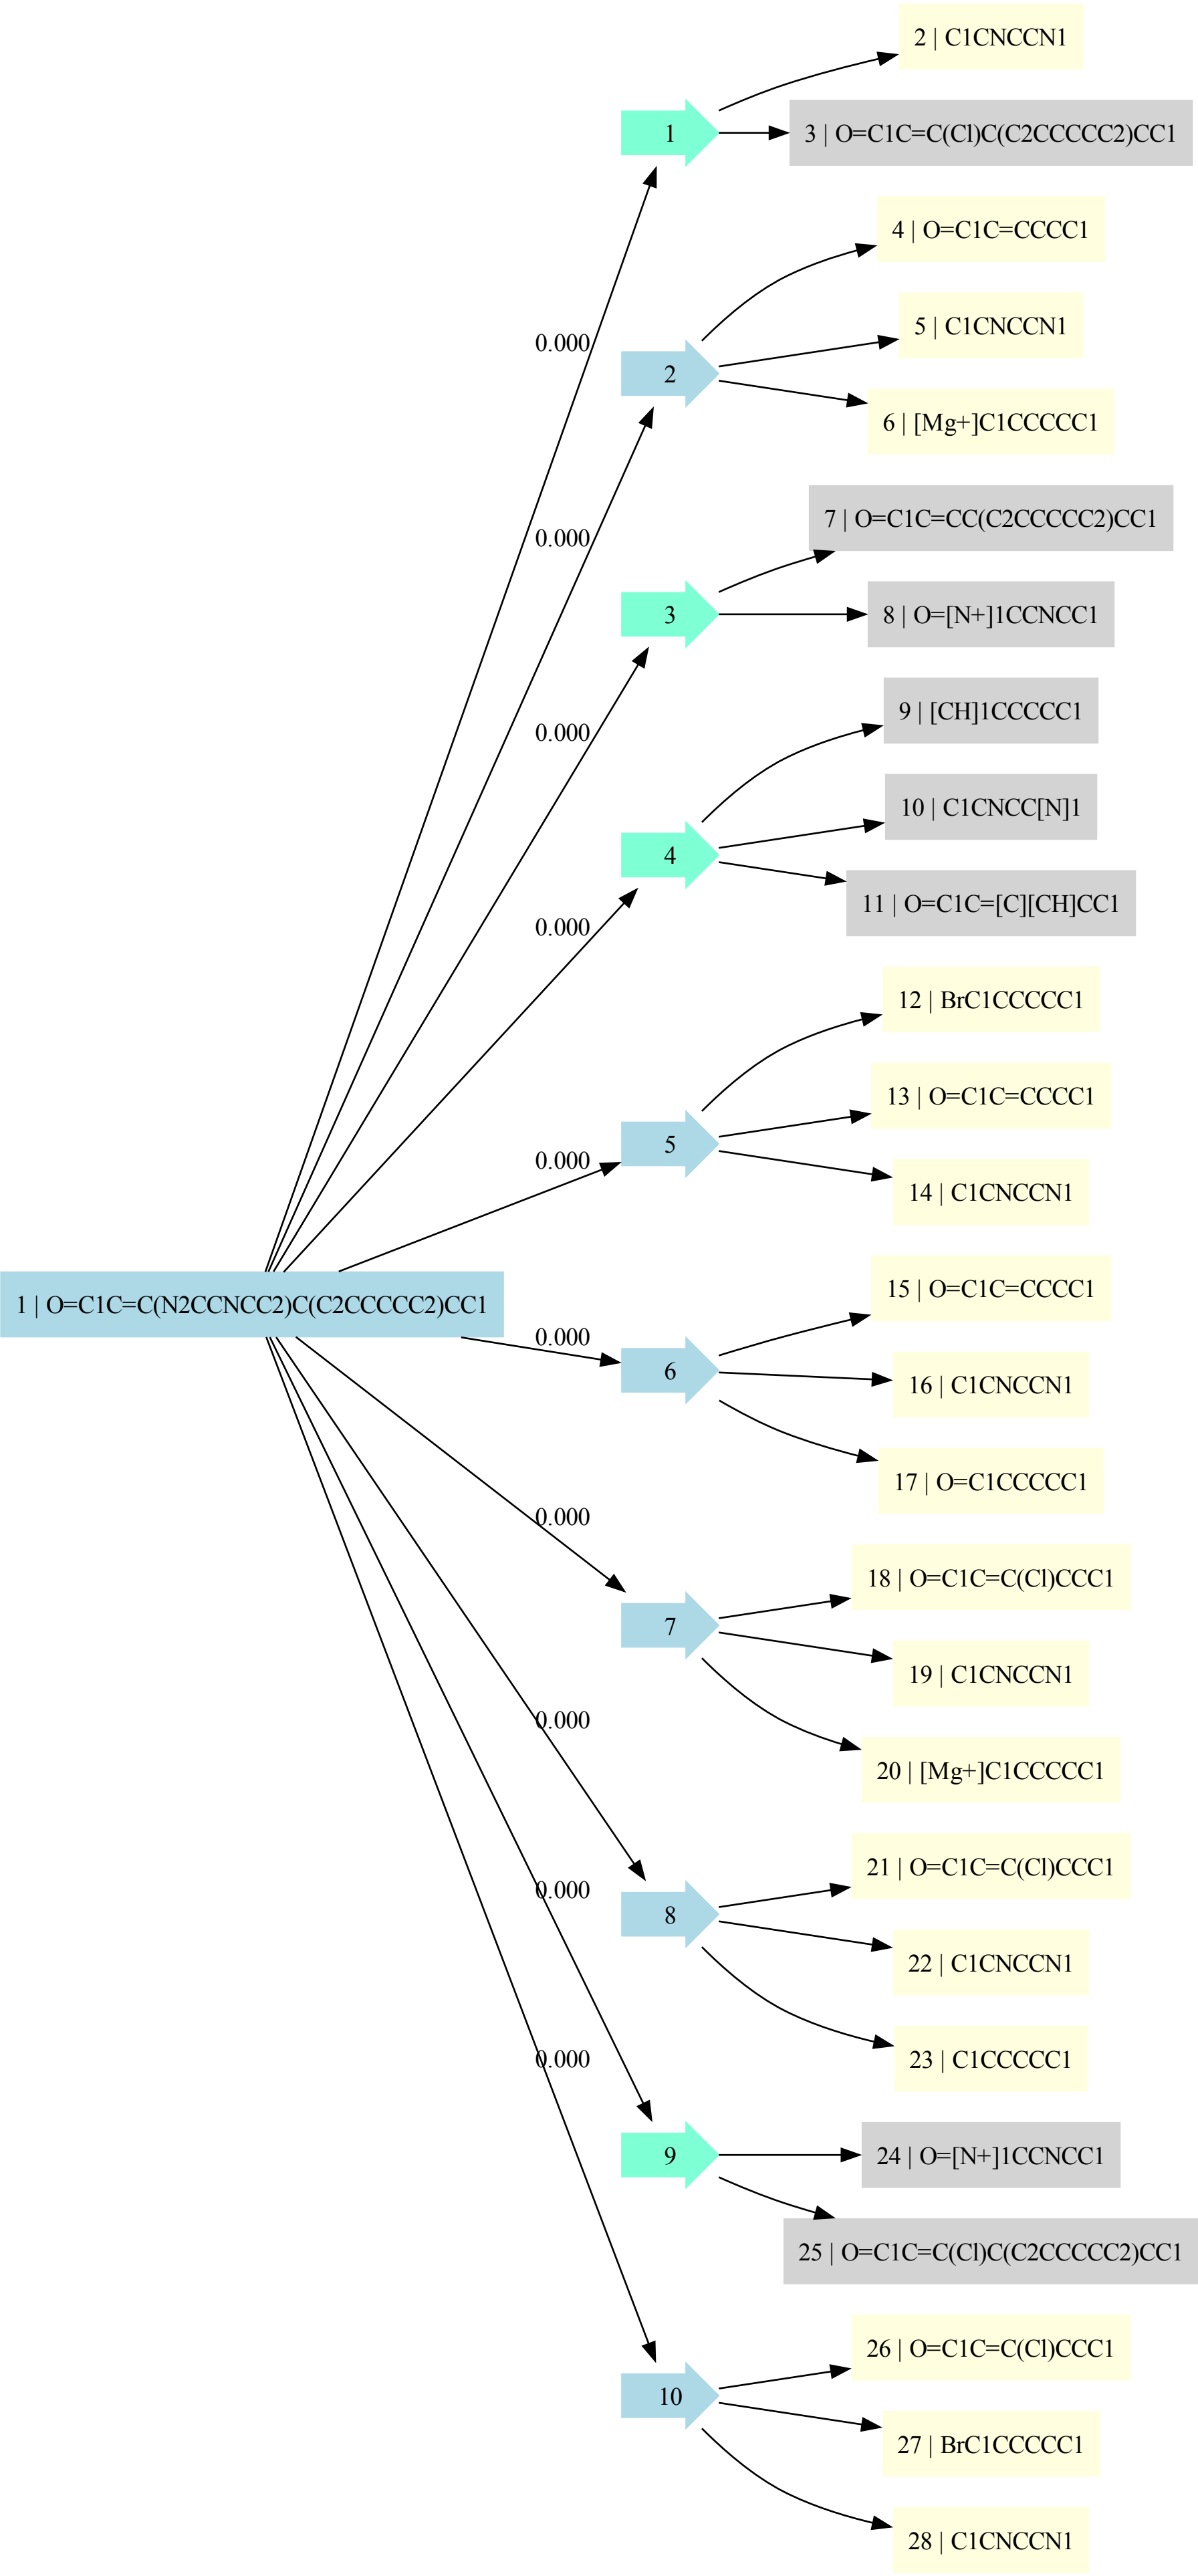

Supplement: supplementary_material [file mol_139_search_tree.pdf › materials9084/retro190_solutions/mol_139_search_tree.pdf]

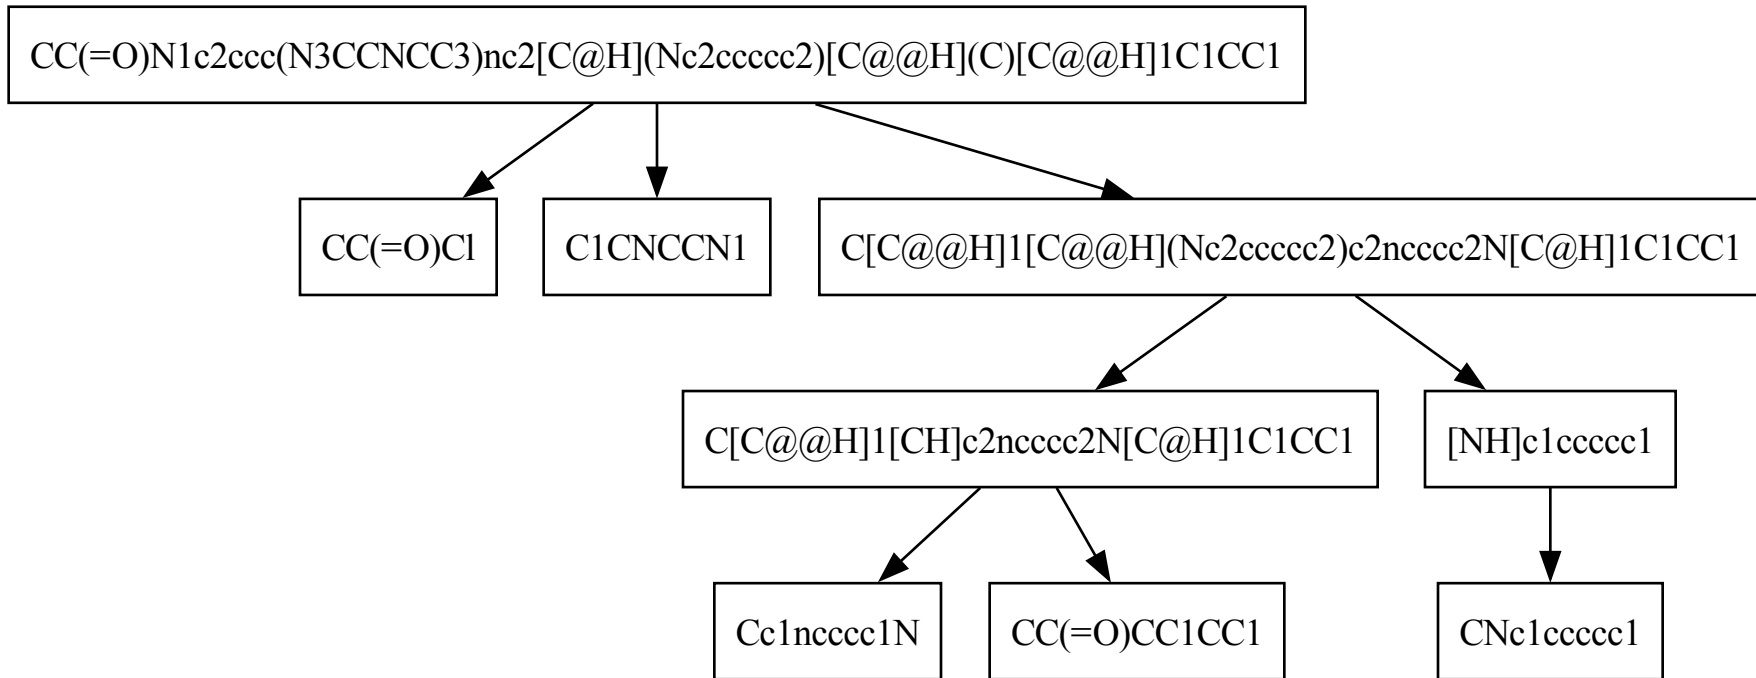

Supplement: supplementary_material [file mol_13_route_optimal.pdf › materials9084/retro190_solutions/mol_13_route_optimal.pdf]

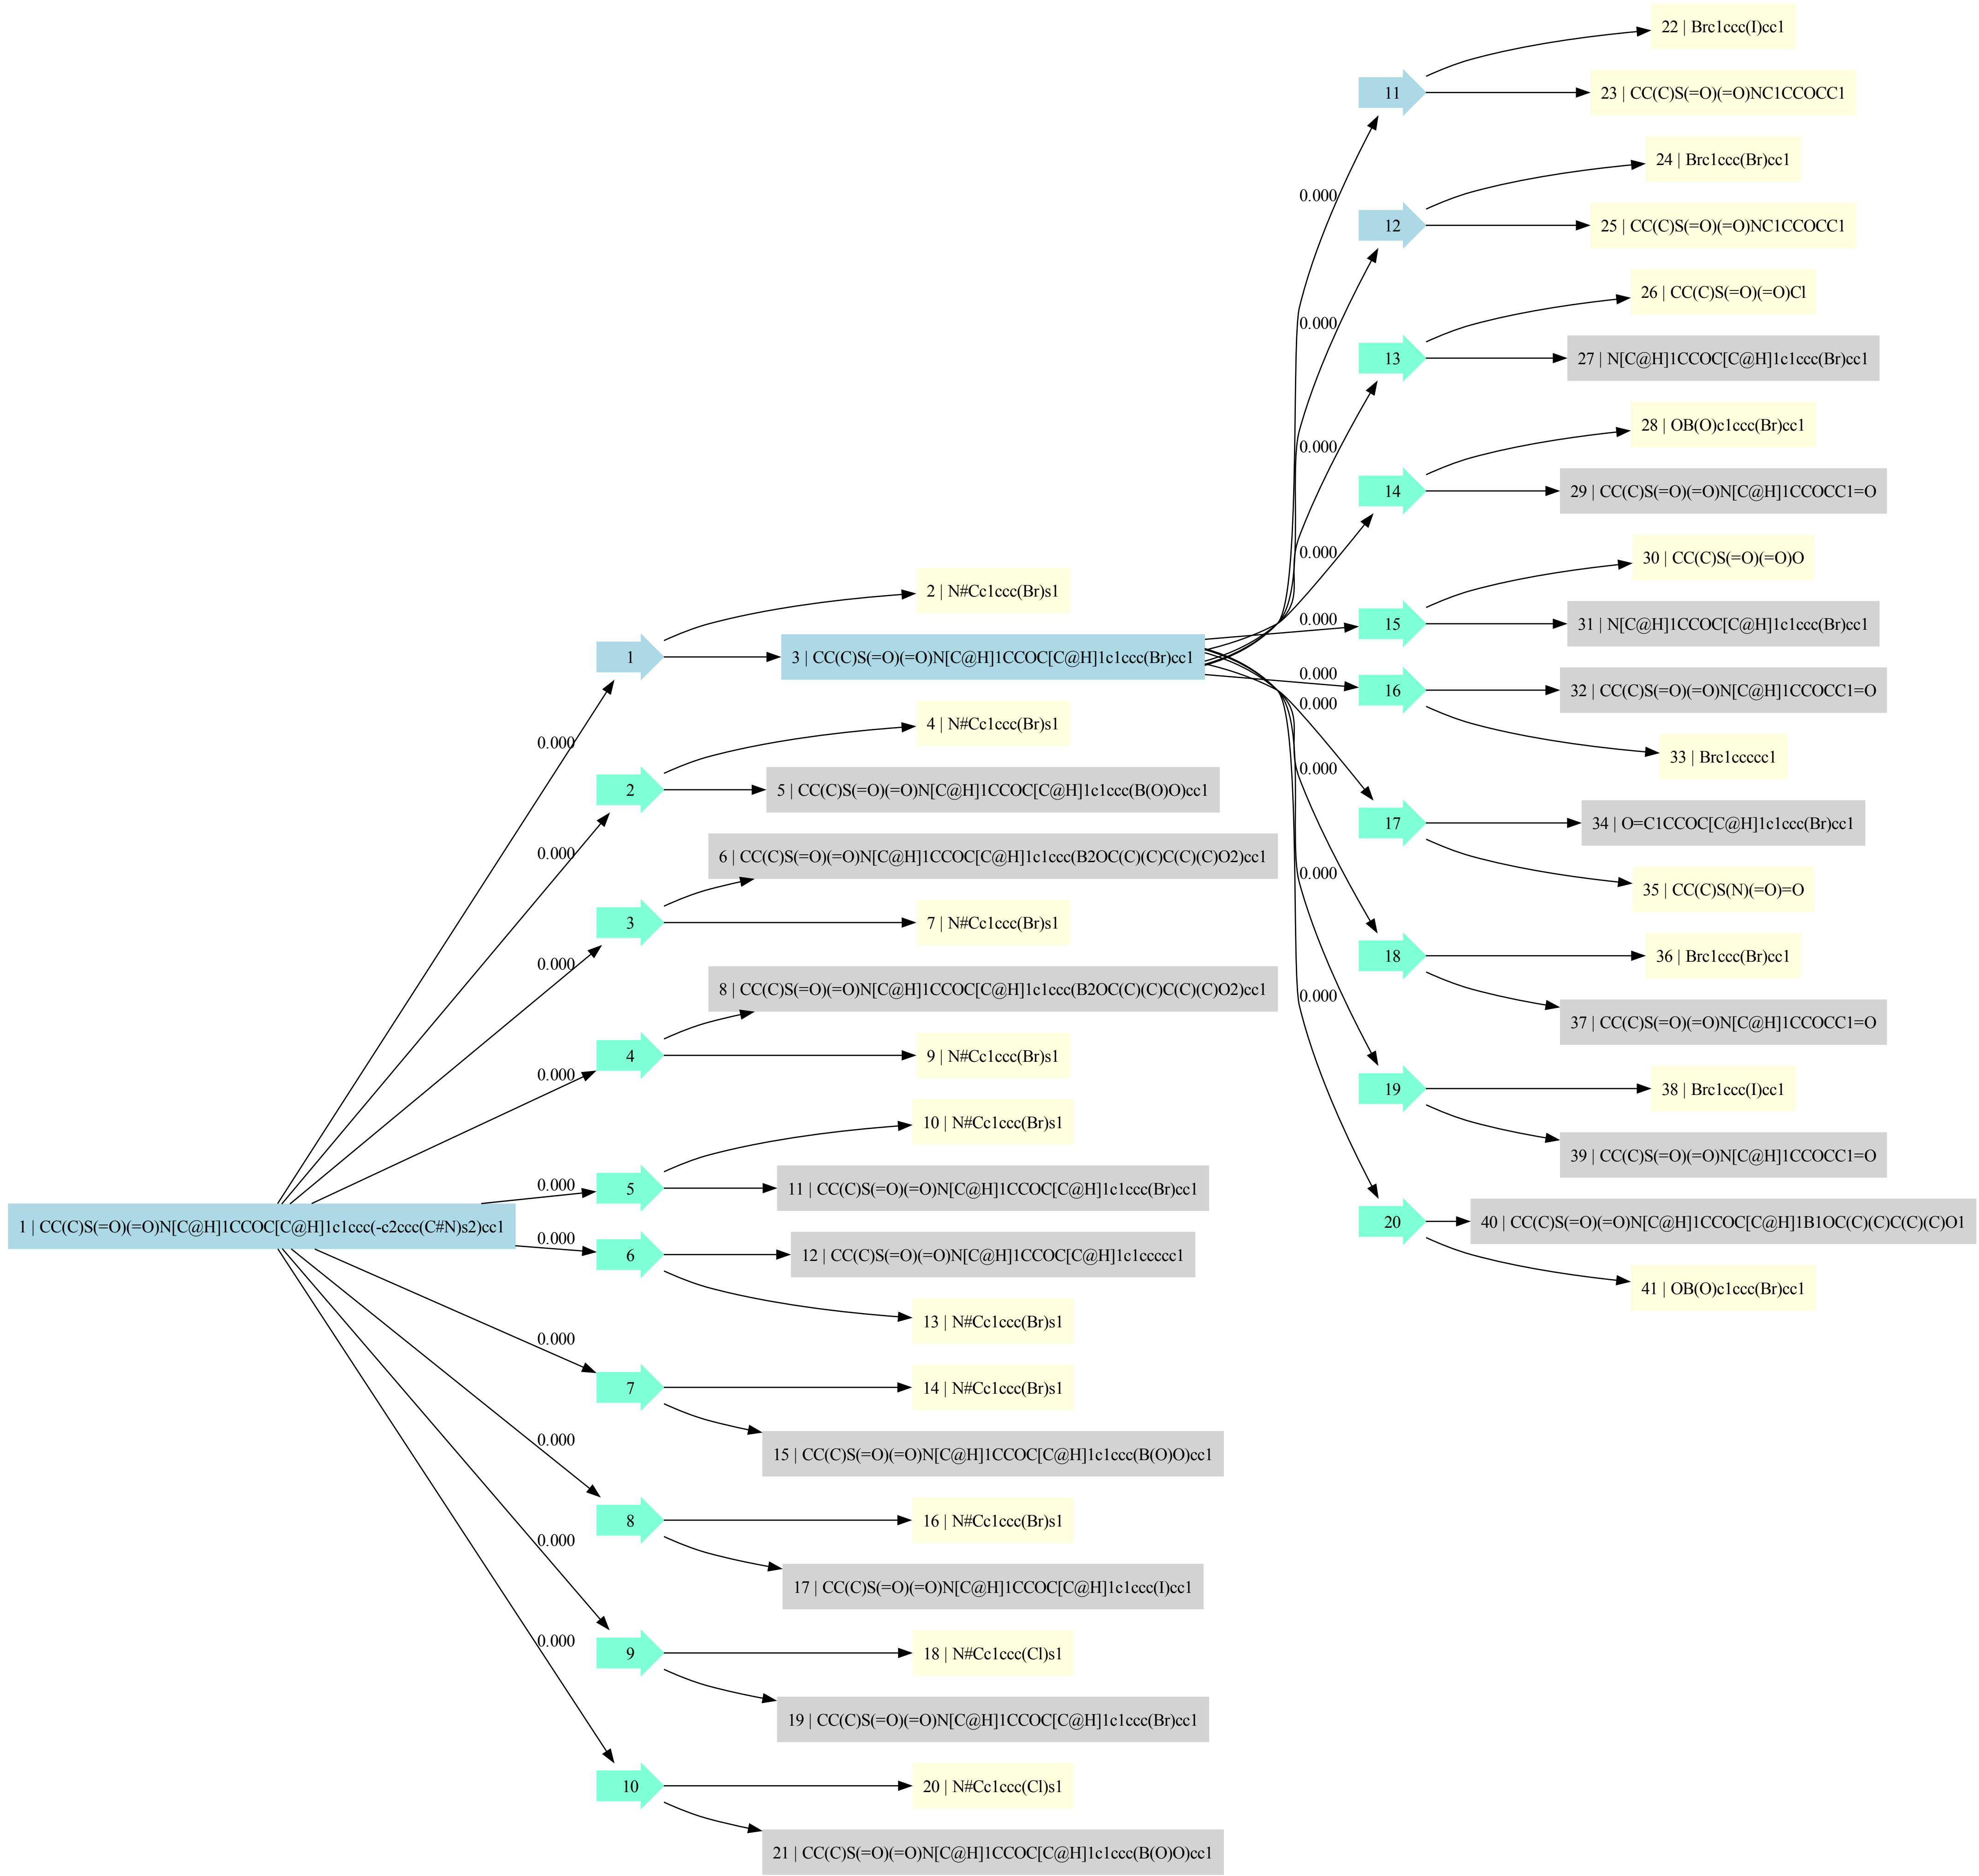

Supplement: supplementary_material [file mol_140_search_tree.pdf › materials9084/retro190_solutions/mol_140_search_tree.pdf]

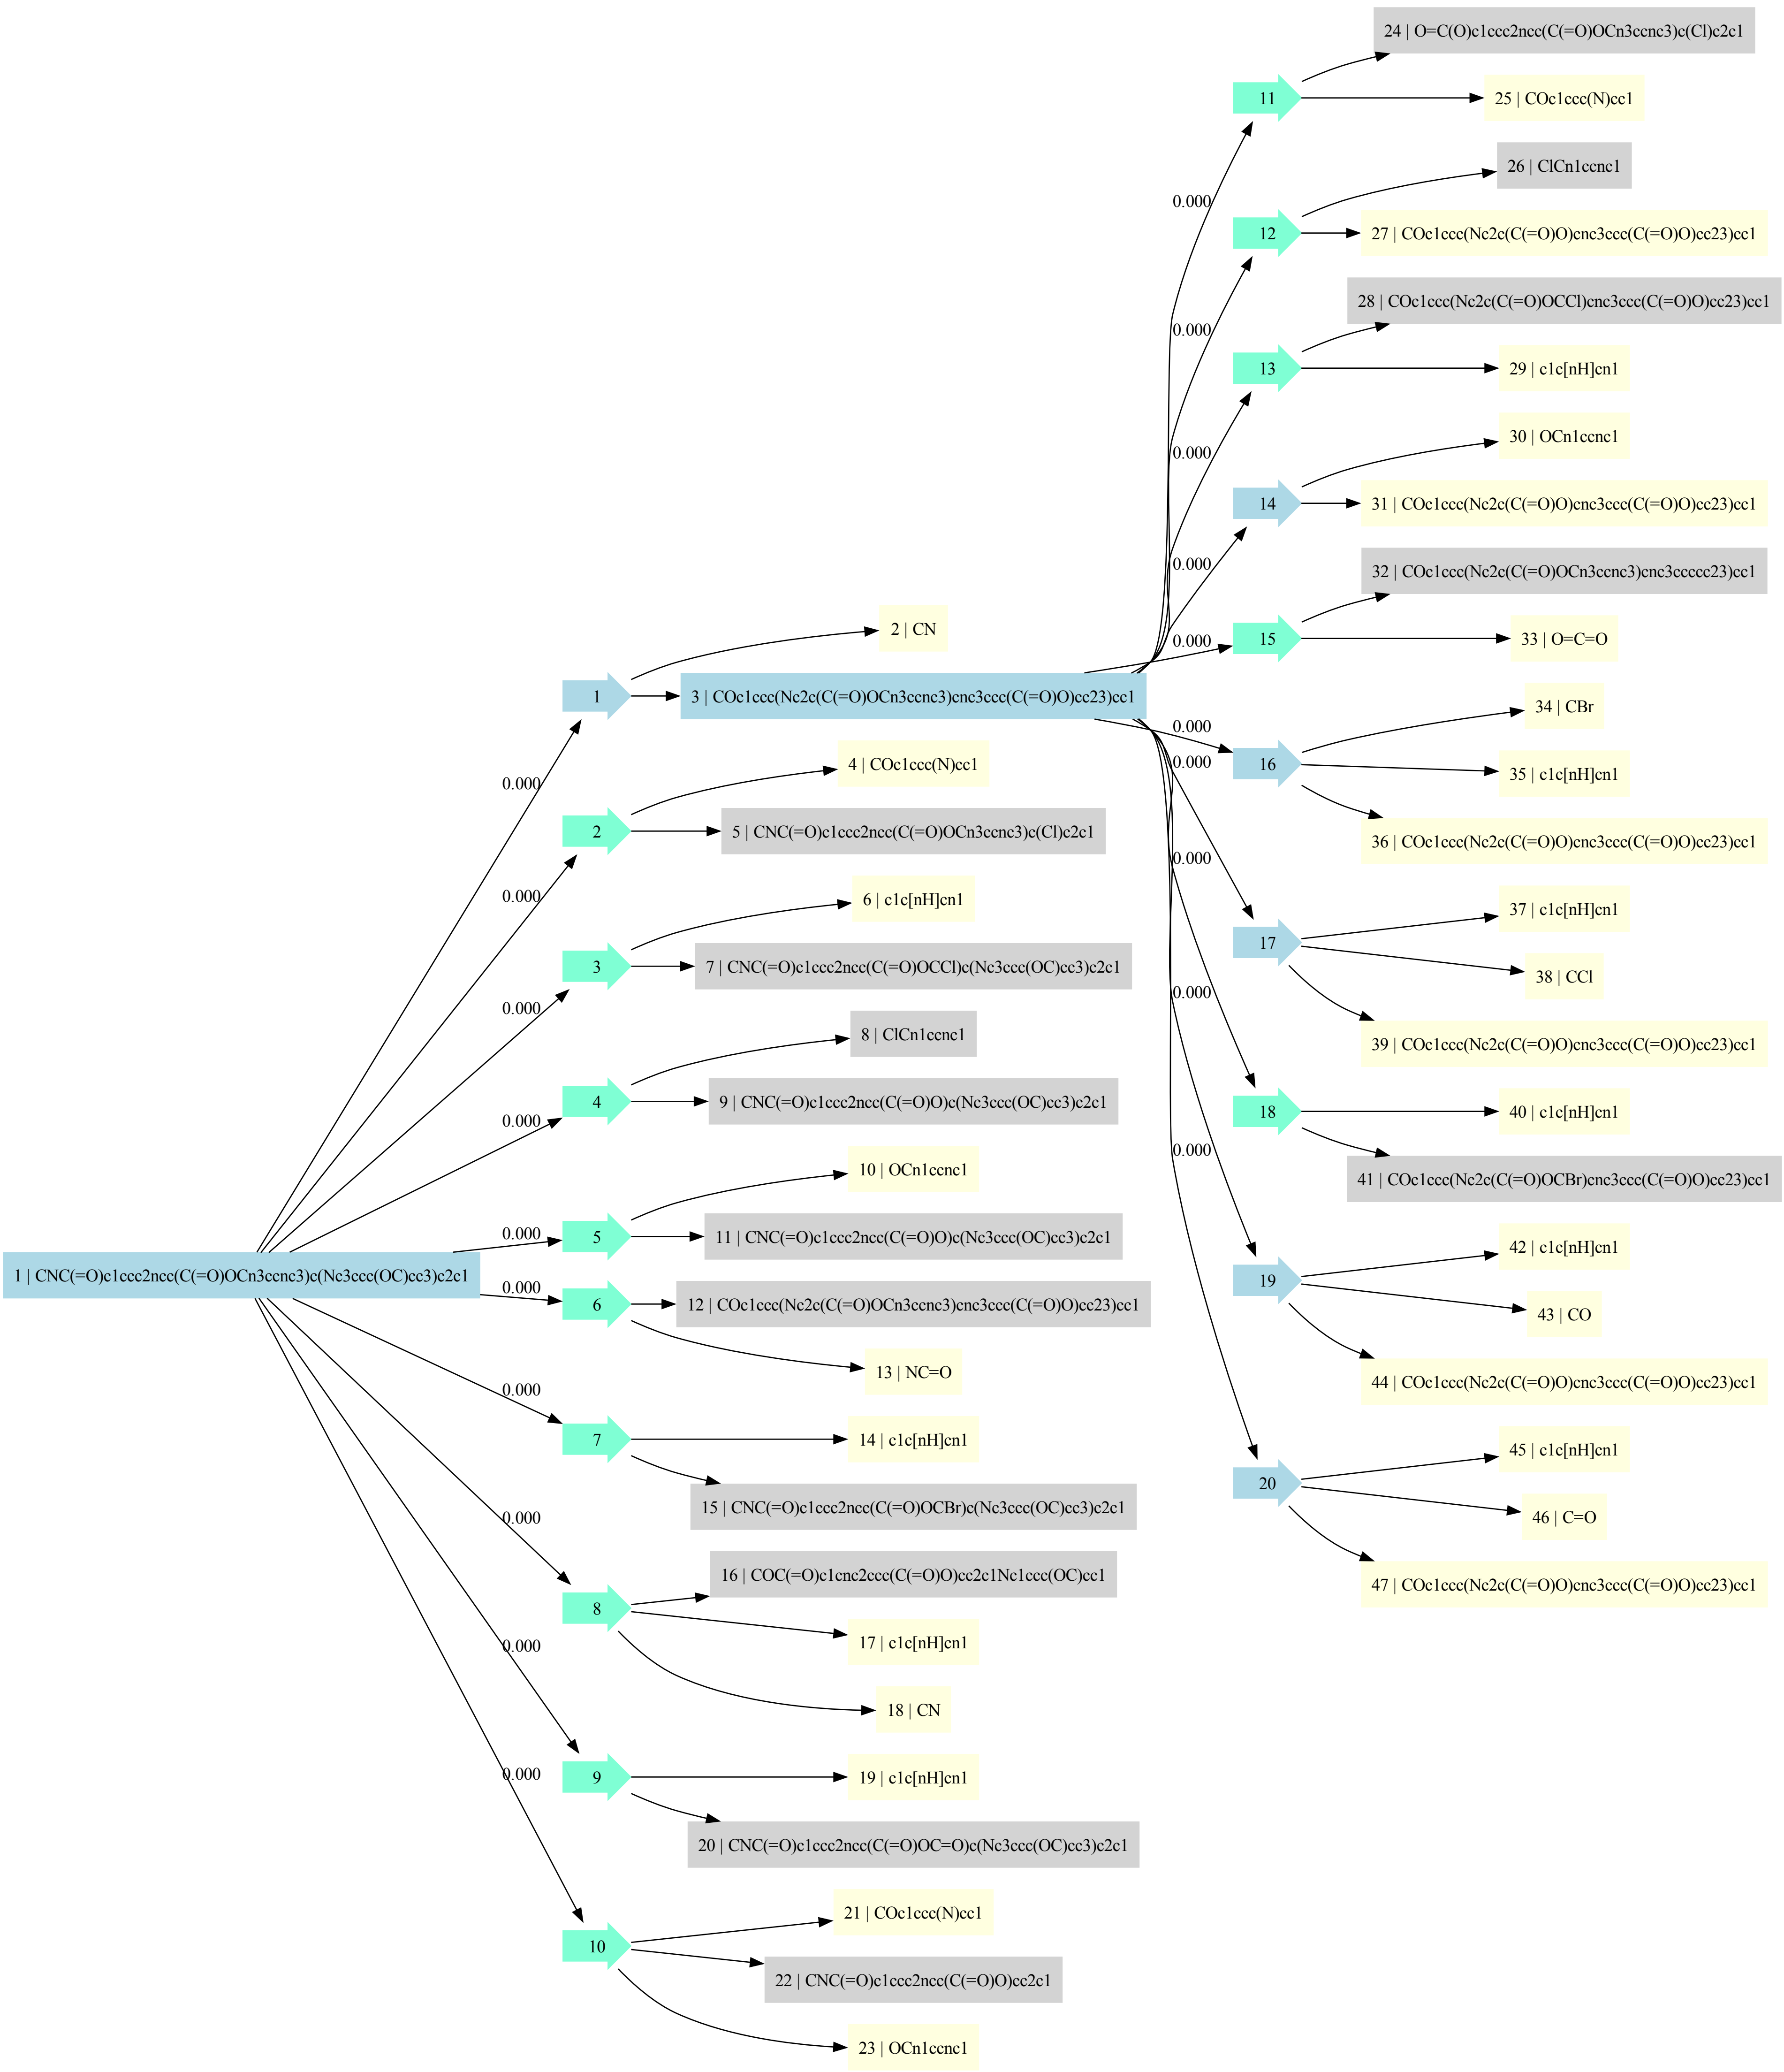

Supplement: supplementary_material [file mol_141_search_tree.pdf › materials9084/retro190_solutions/mol_141_search_tree.pdf]

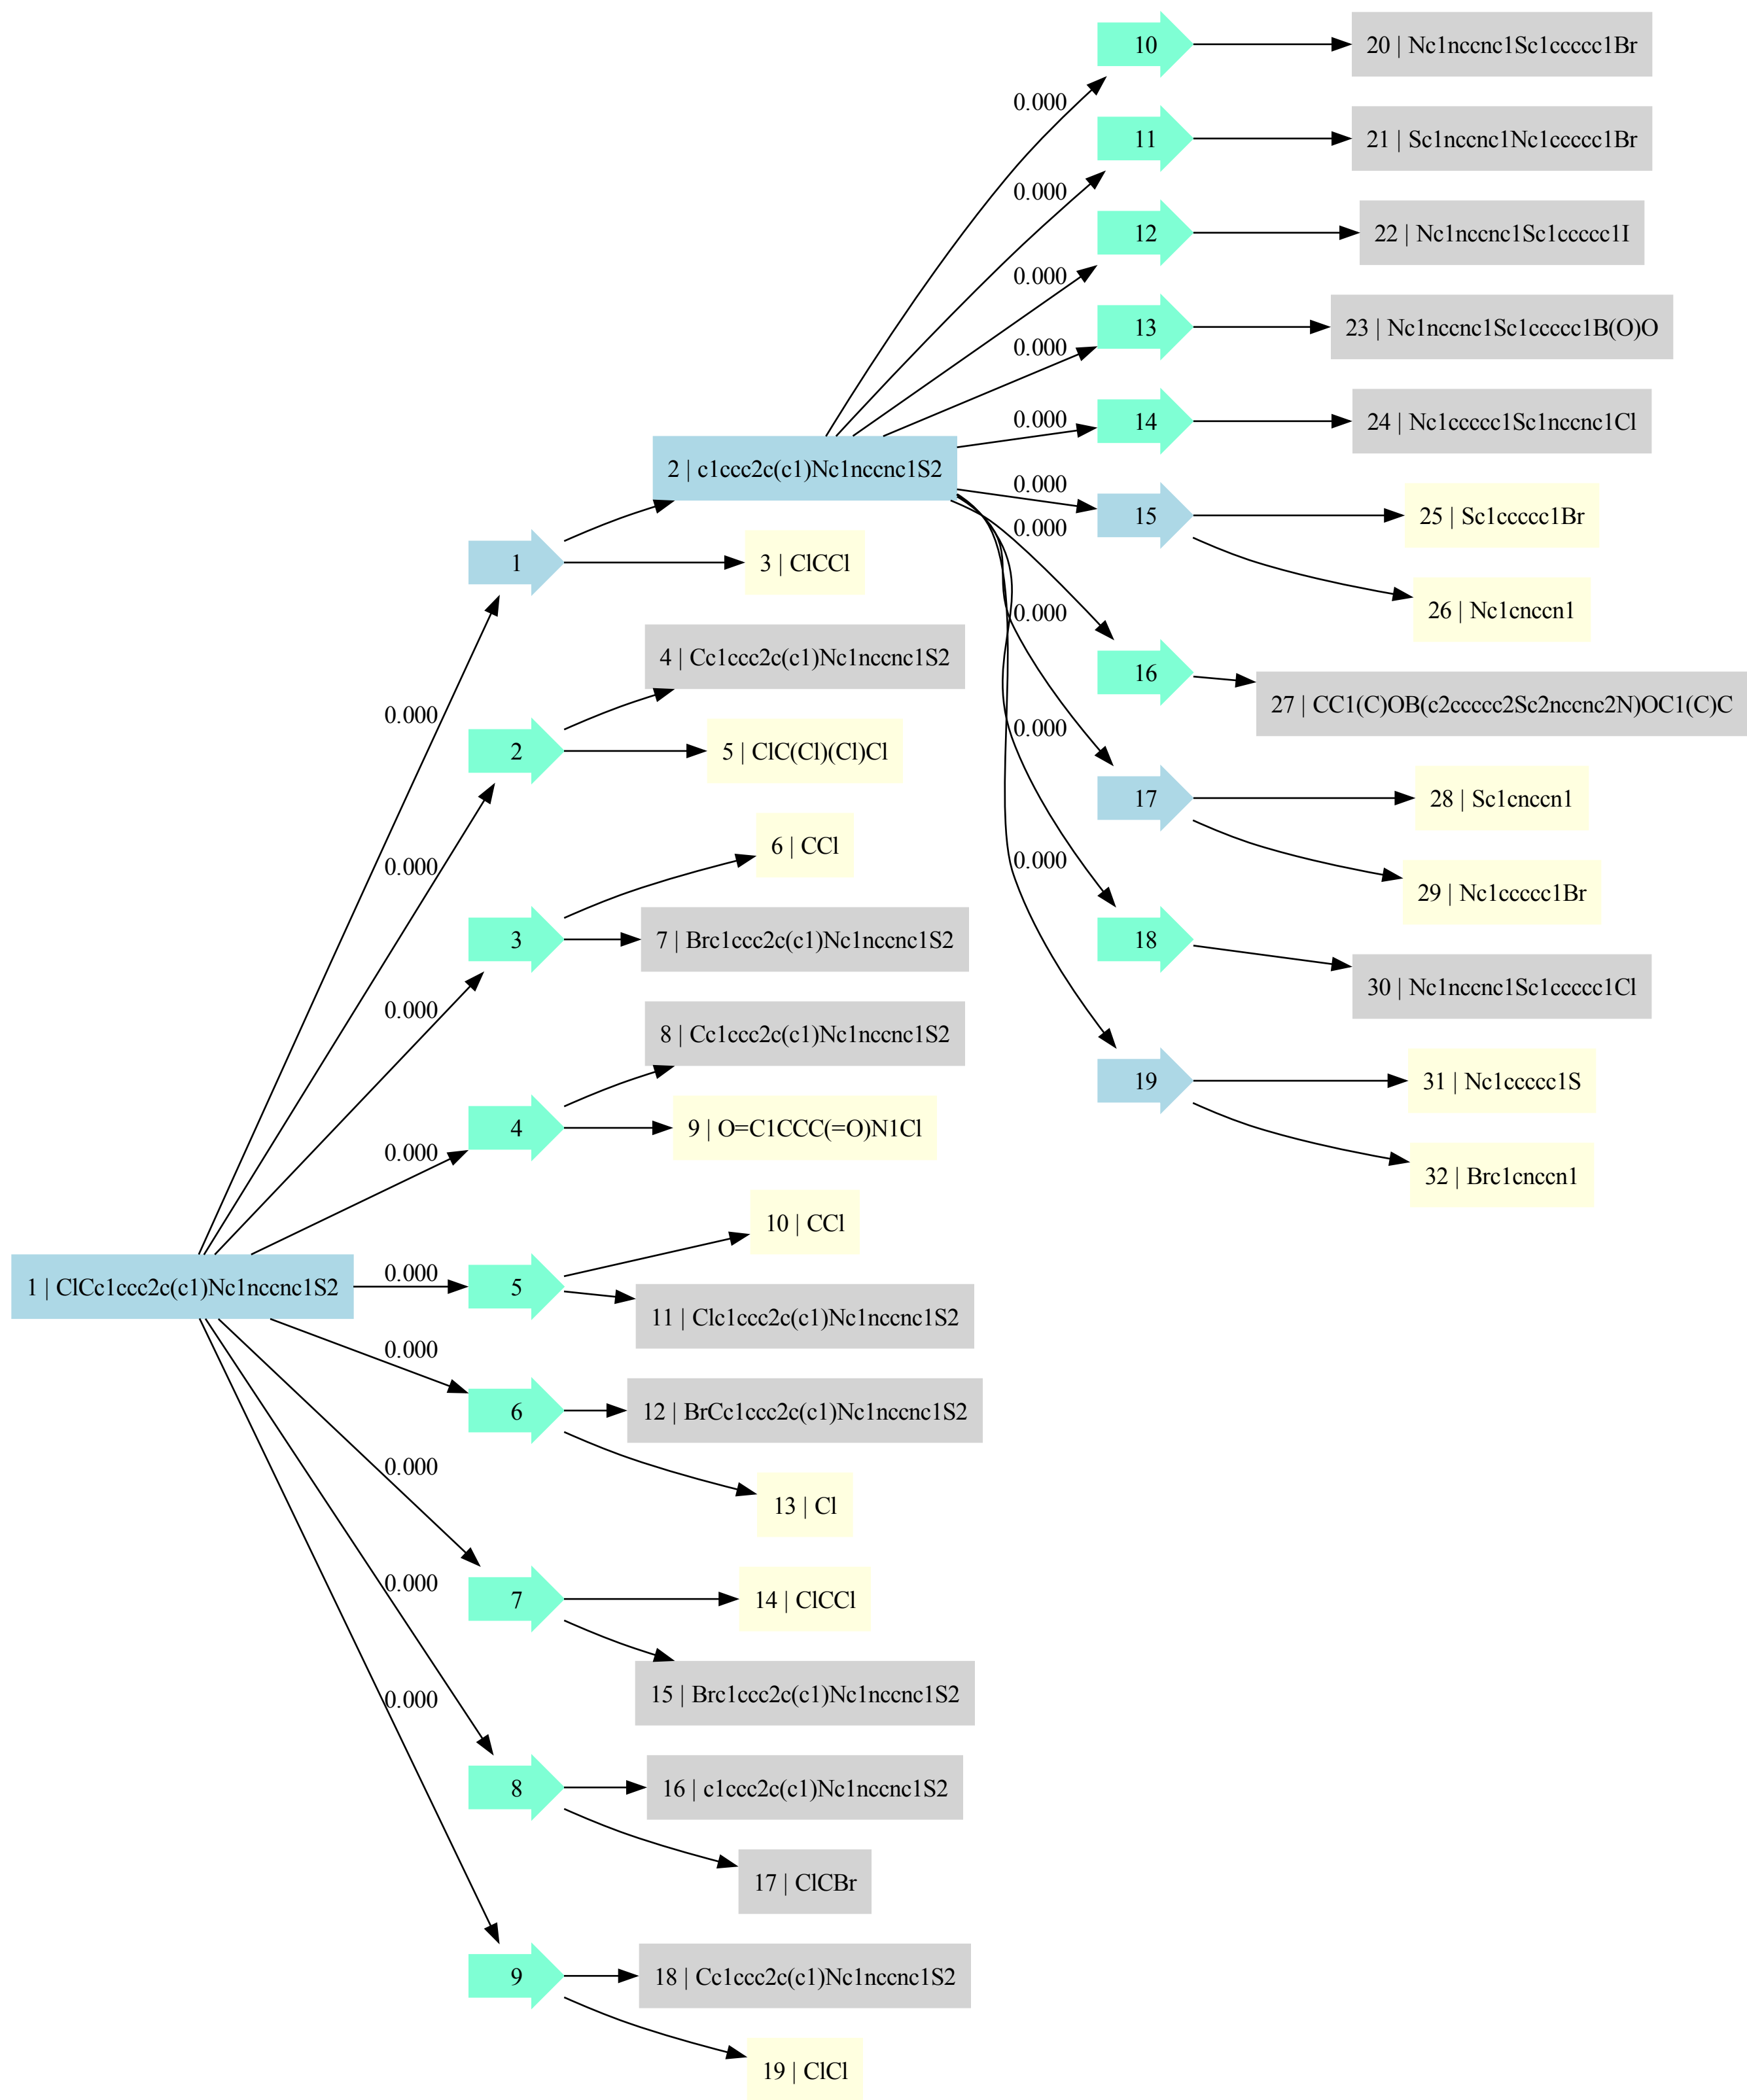

Supplement: supplementary_material [file mol_142_search_tree.pdf › materials9084/retro190_solutions/mol_142_search_tree.pdf]

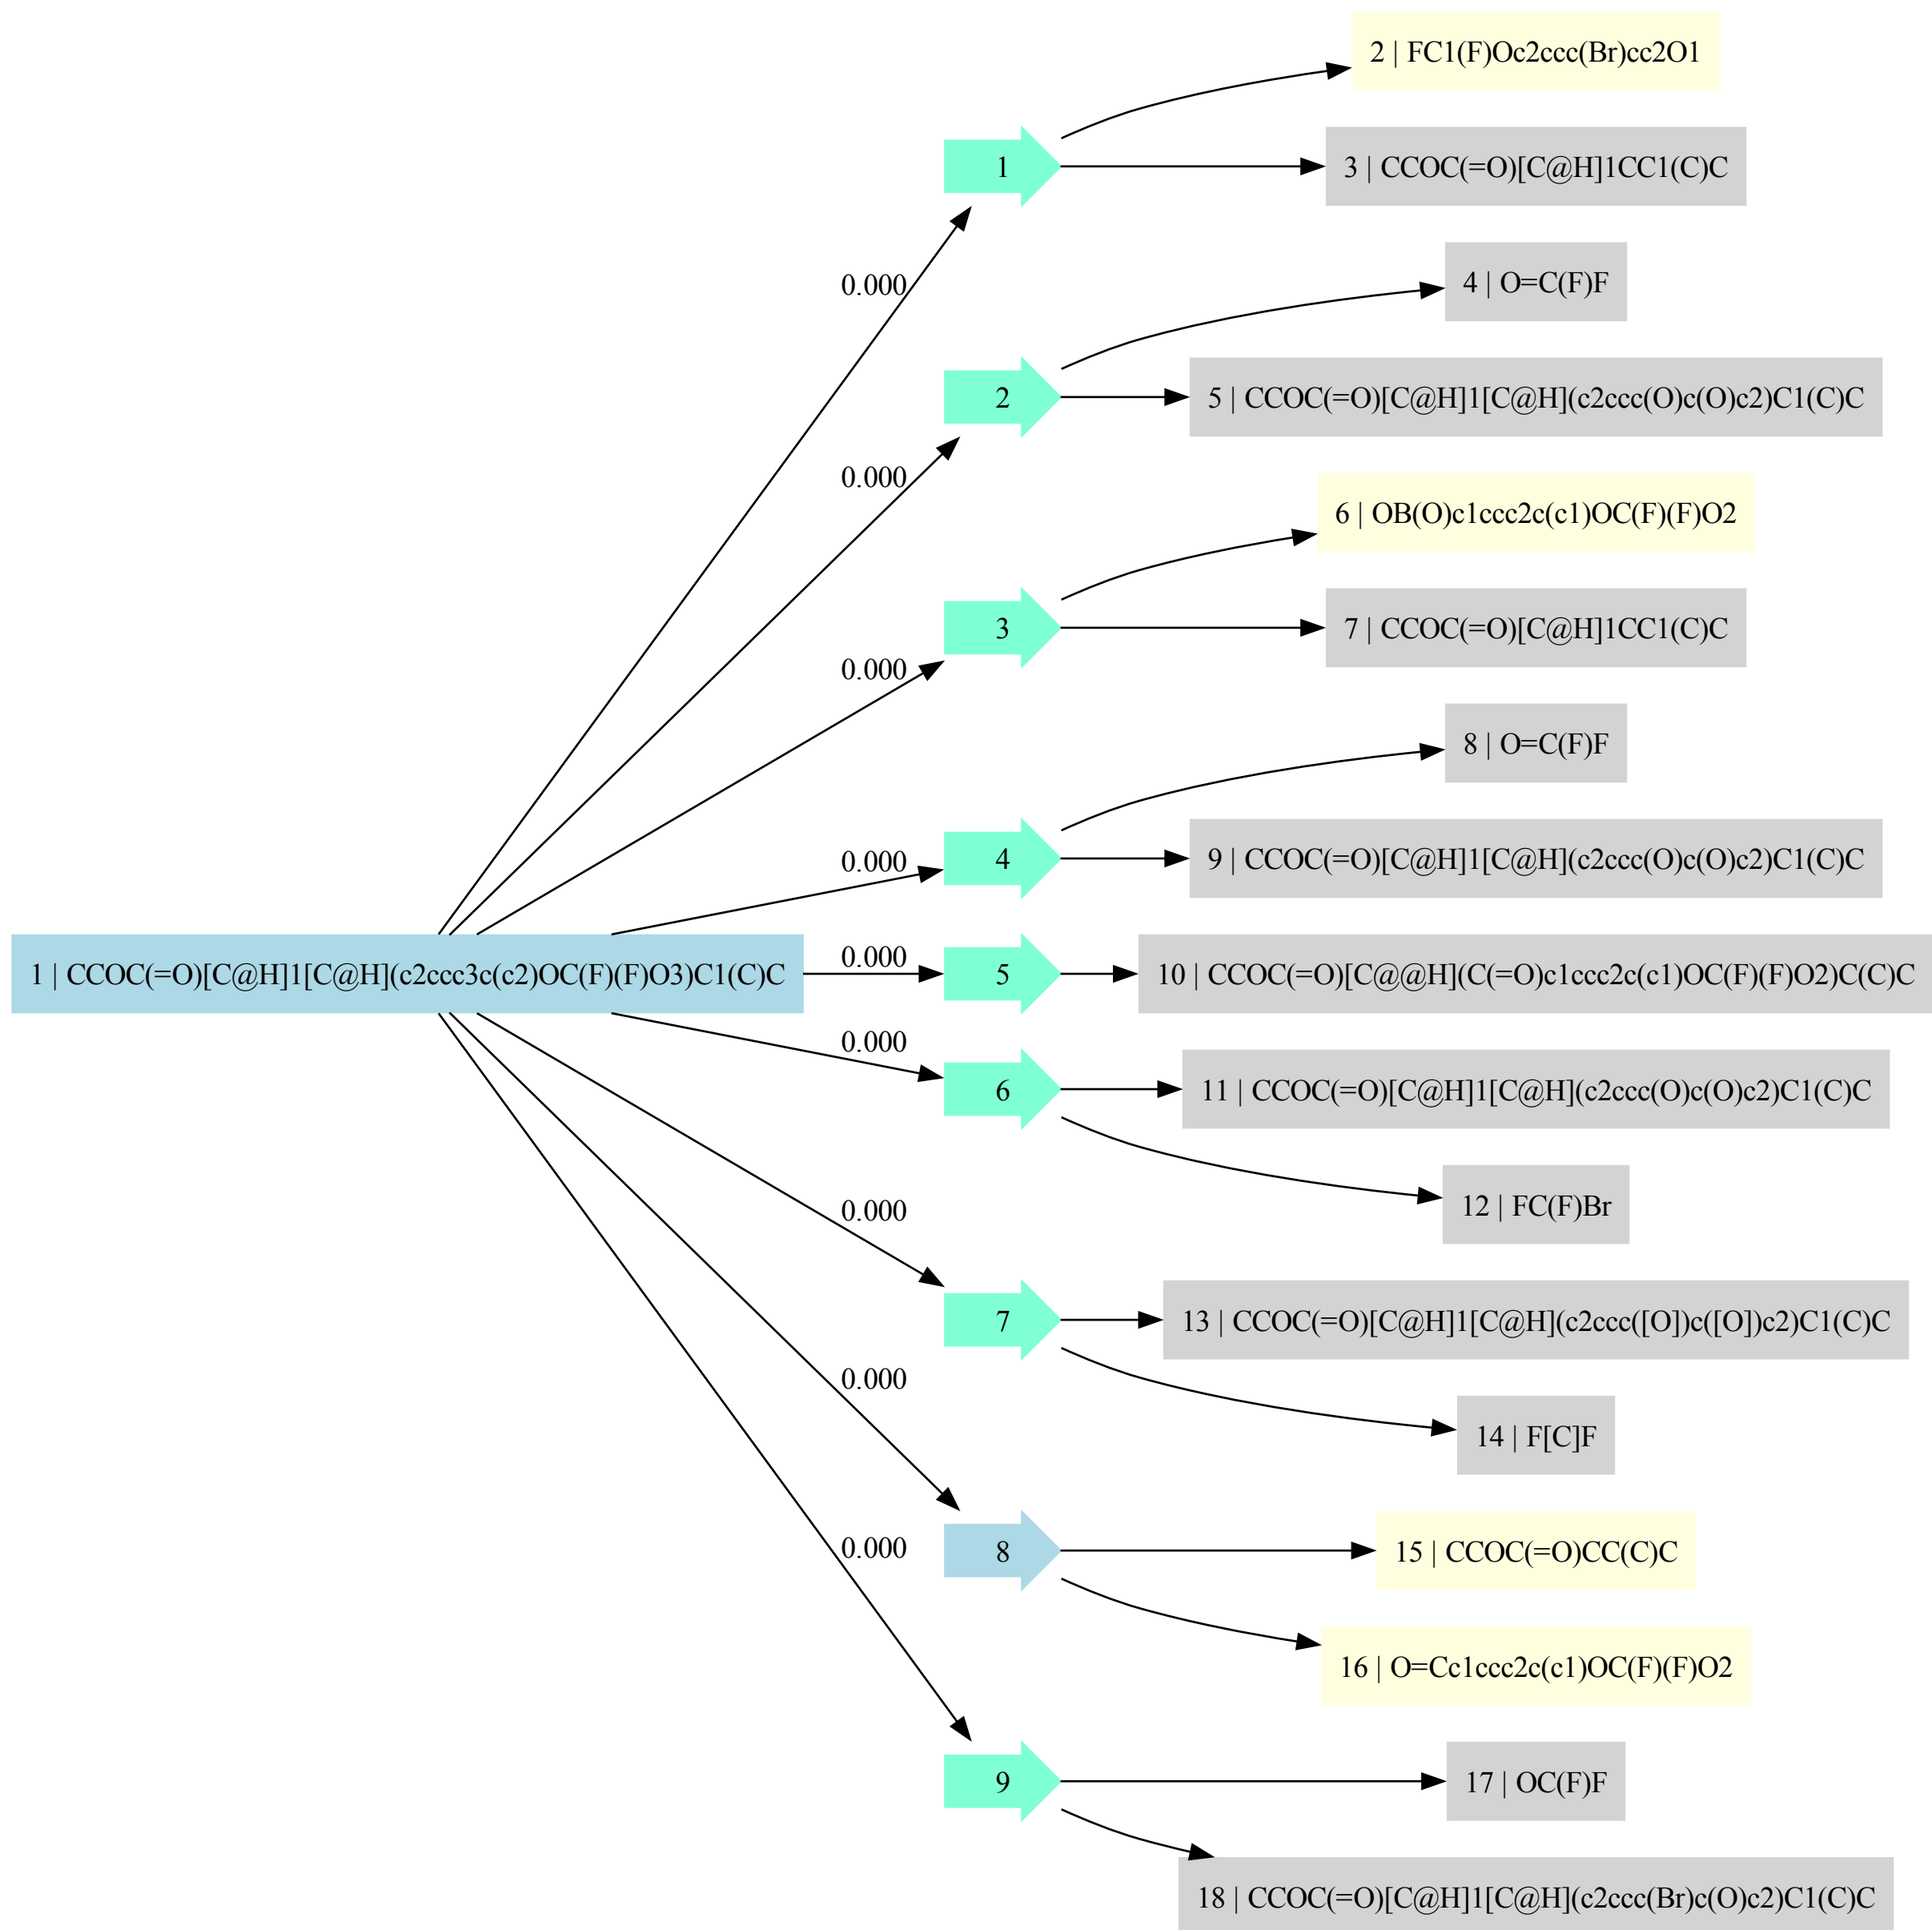

Supplement: supplementary_material [file mol_143_search_tree.pdf › materials9084/retro190_solutions/mol_143_search_tree.pdf]

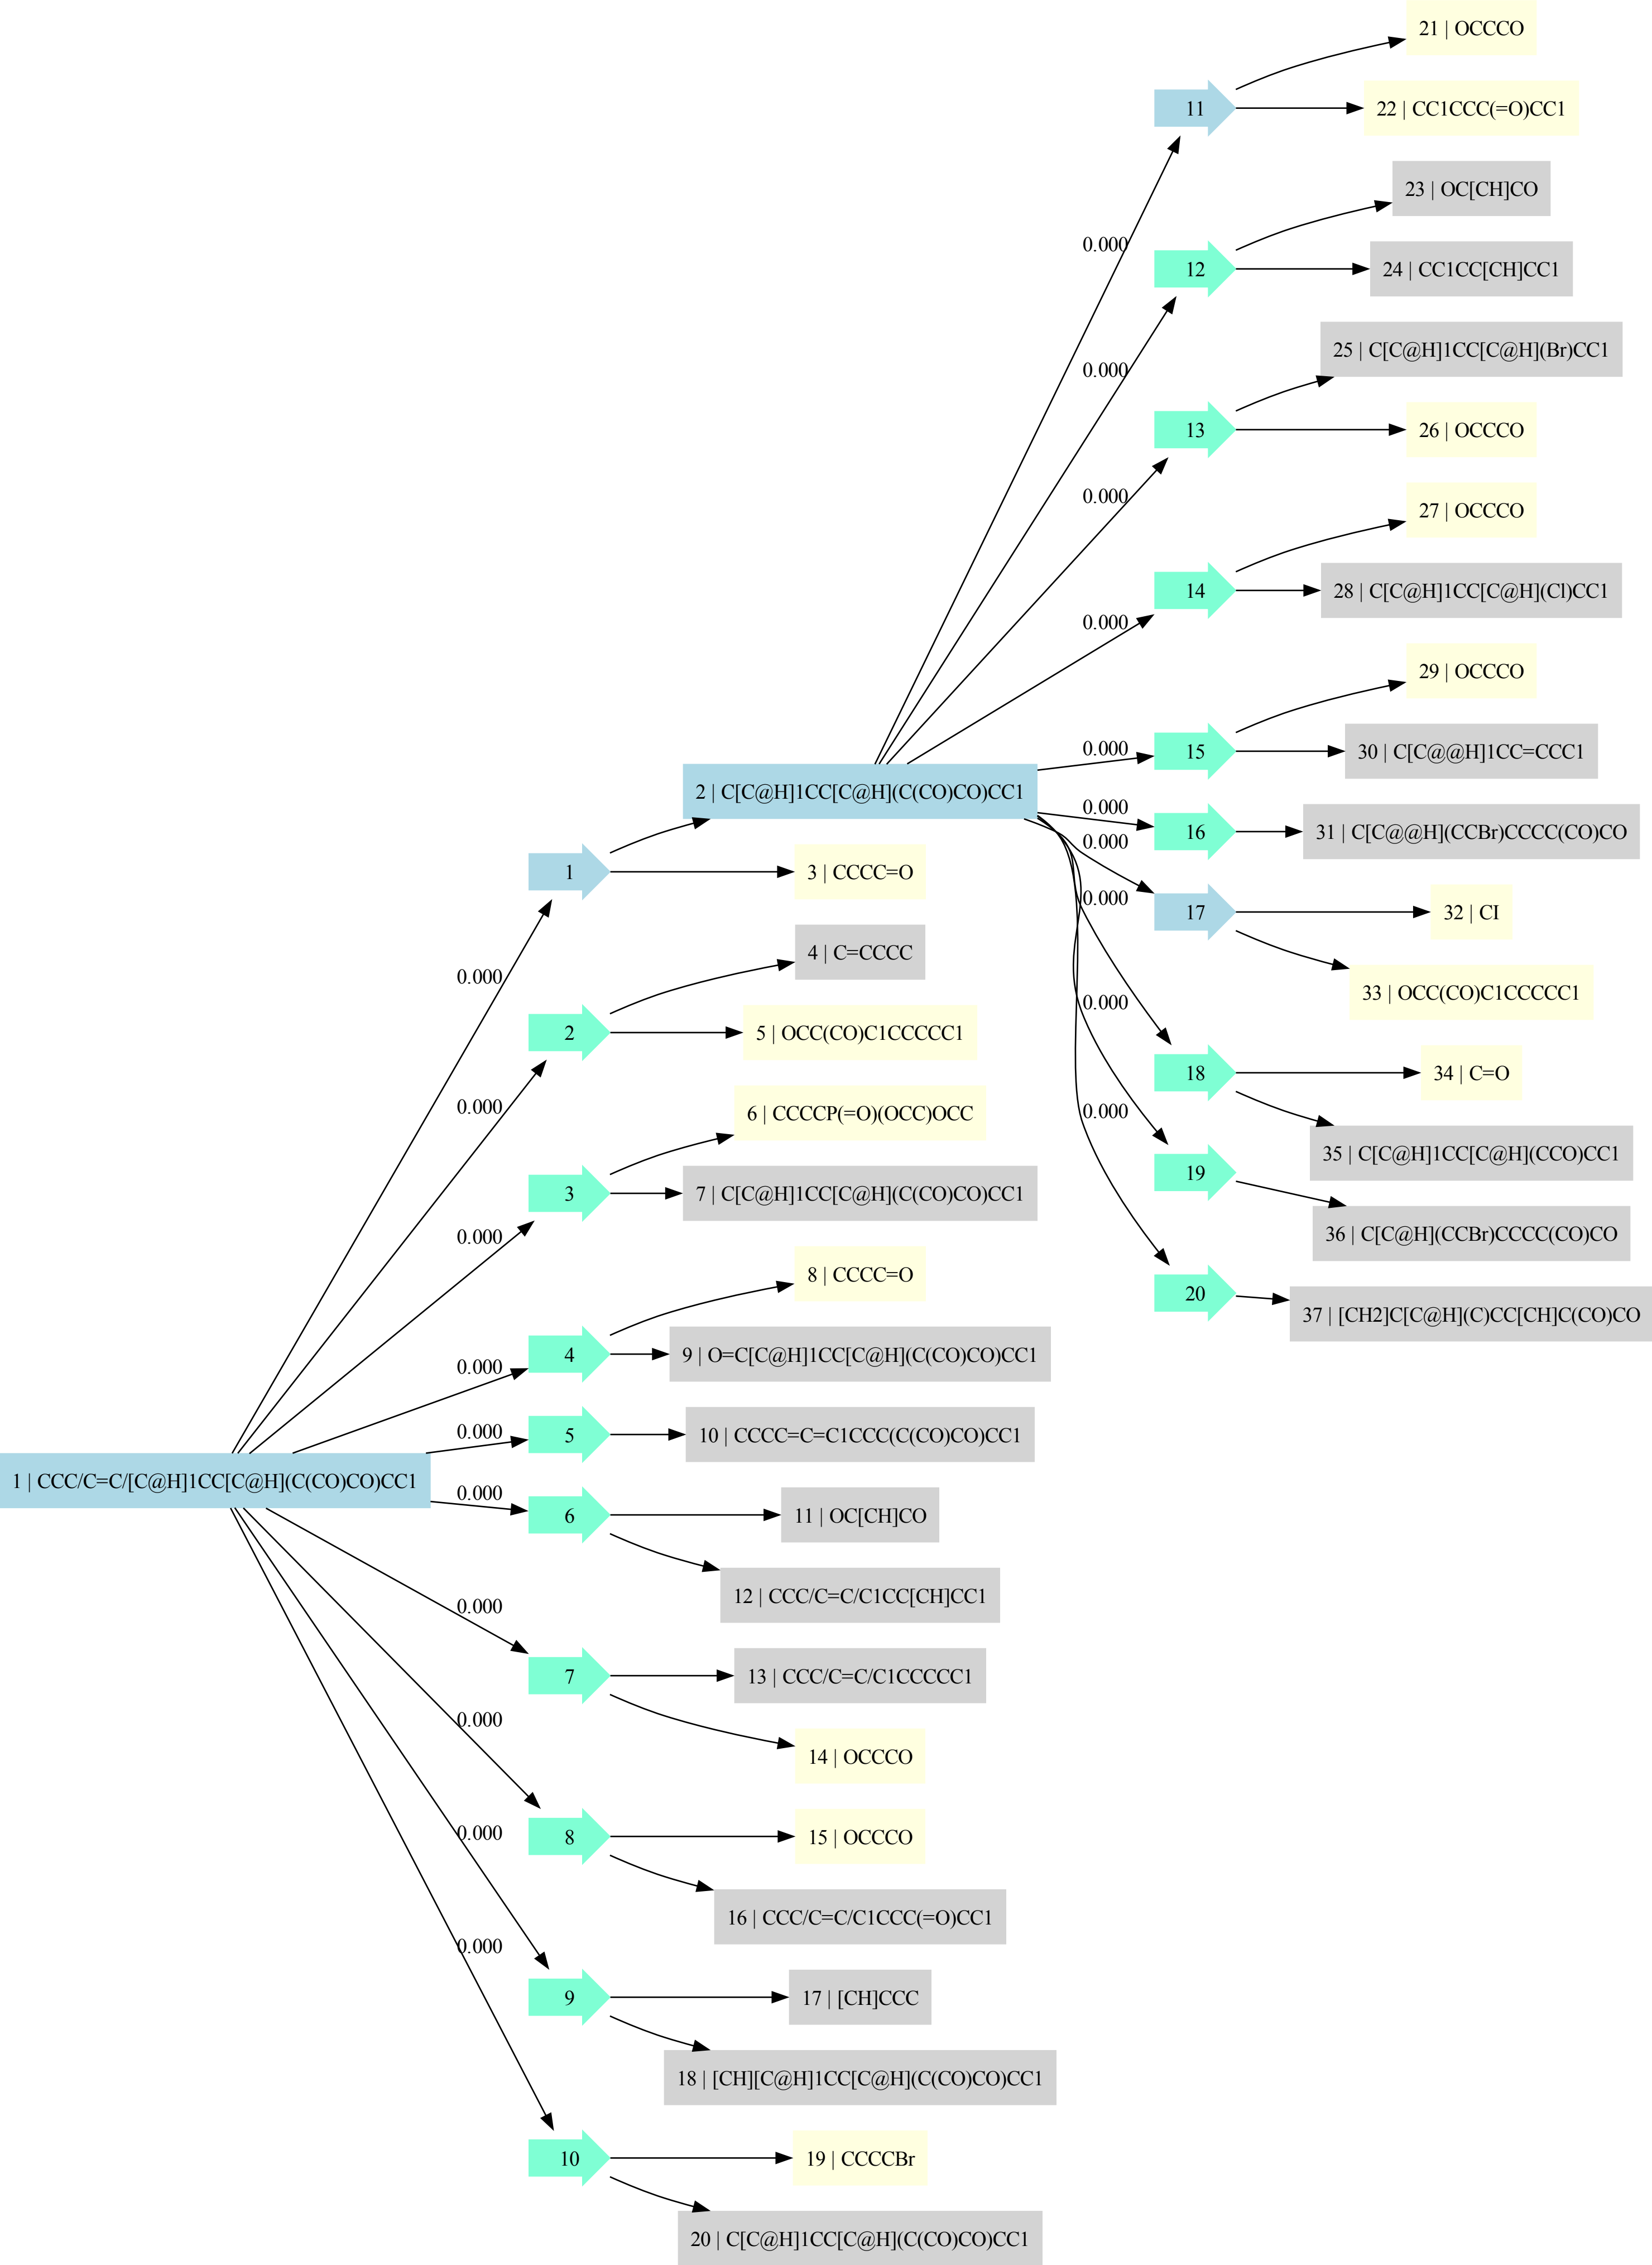

Supplement: supplementary_material [file mol_144_search_tree.pdf › materials9084/retro190_solutions/mol_144_search_tree.pdf]

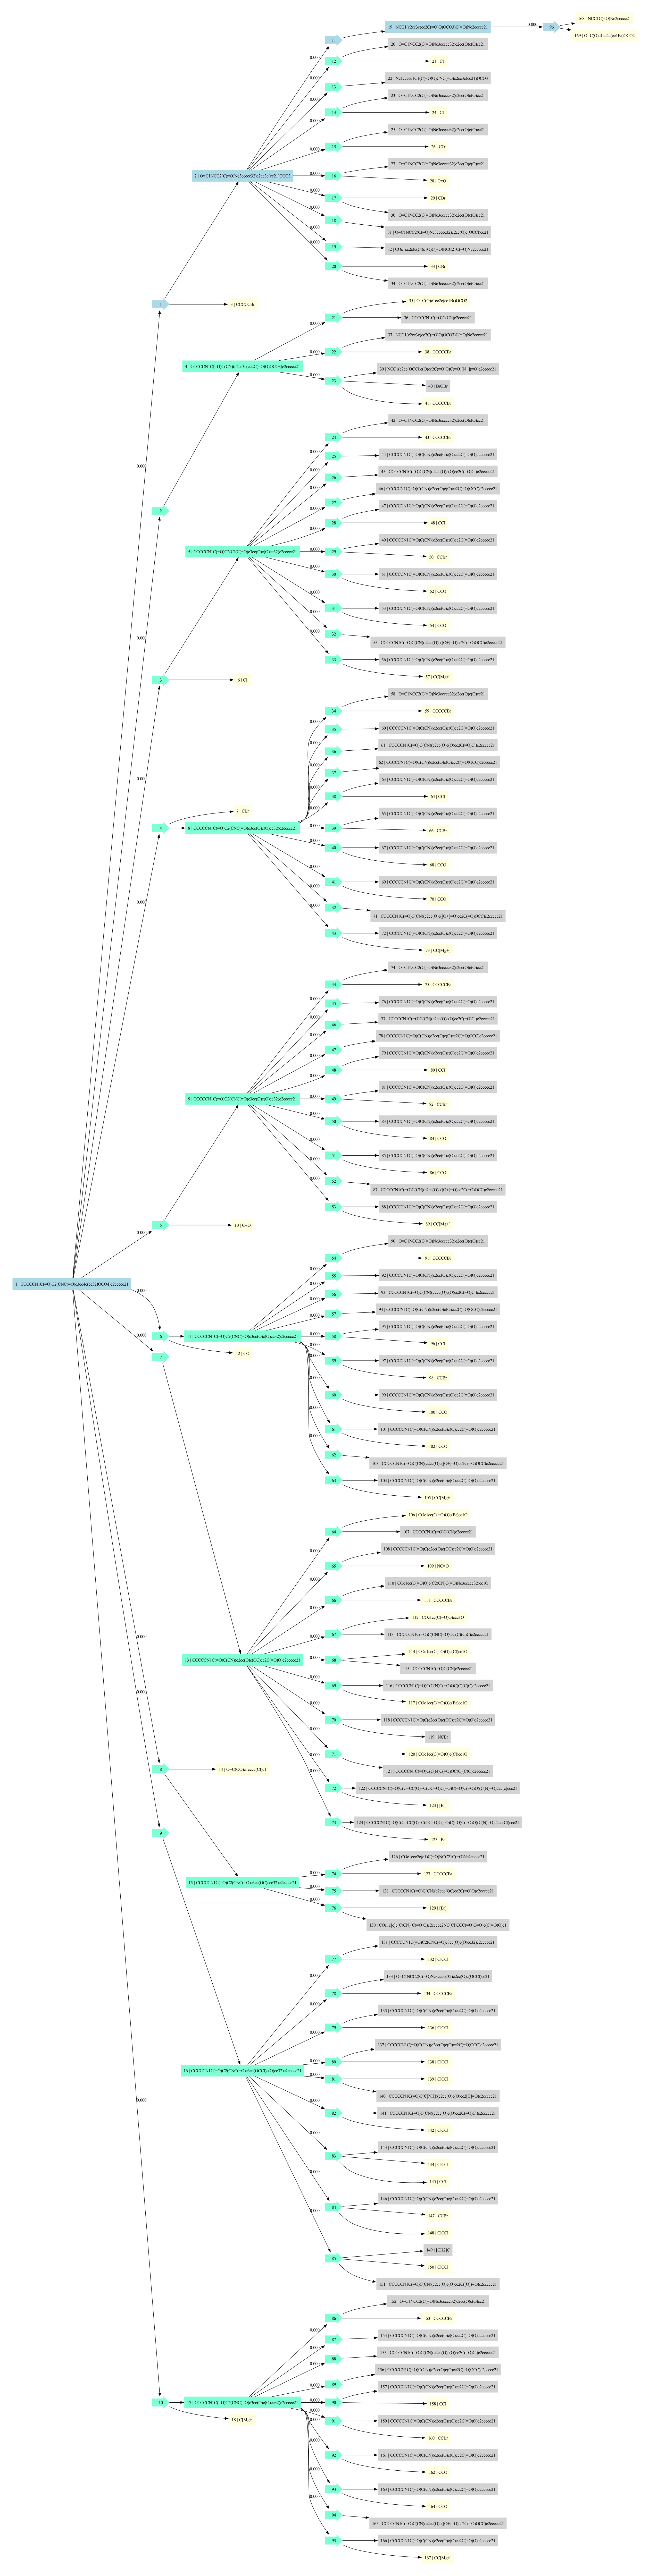

Supplement: supplementary_material [file mol_145_search_tree.pdf › materials9084/retro190_solutions/mol_145_search_tree.pdf]

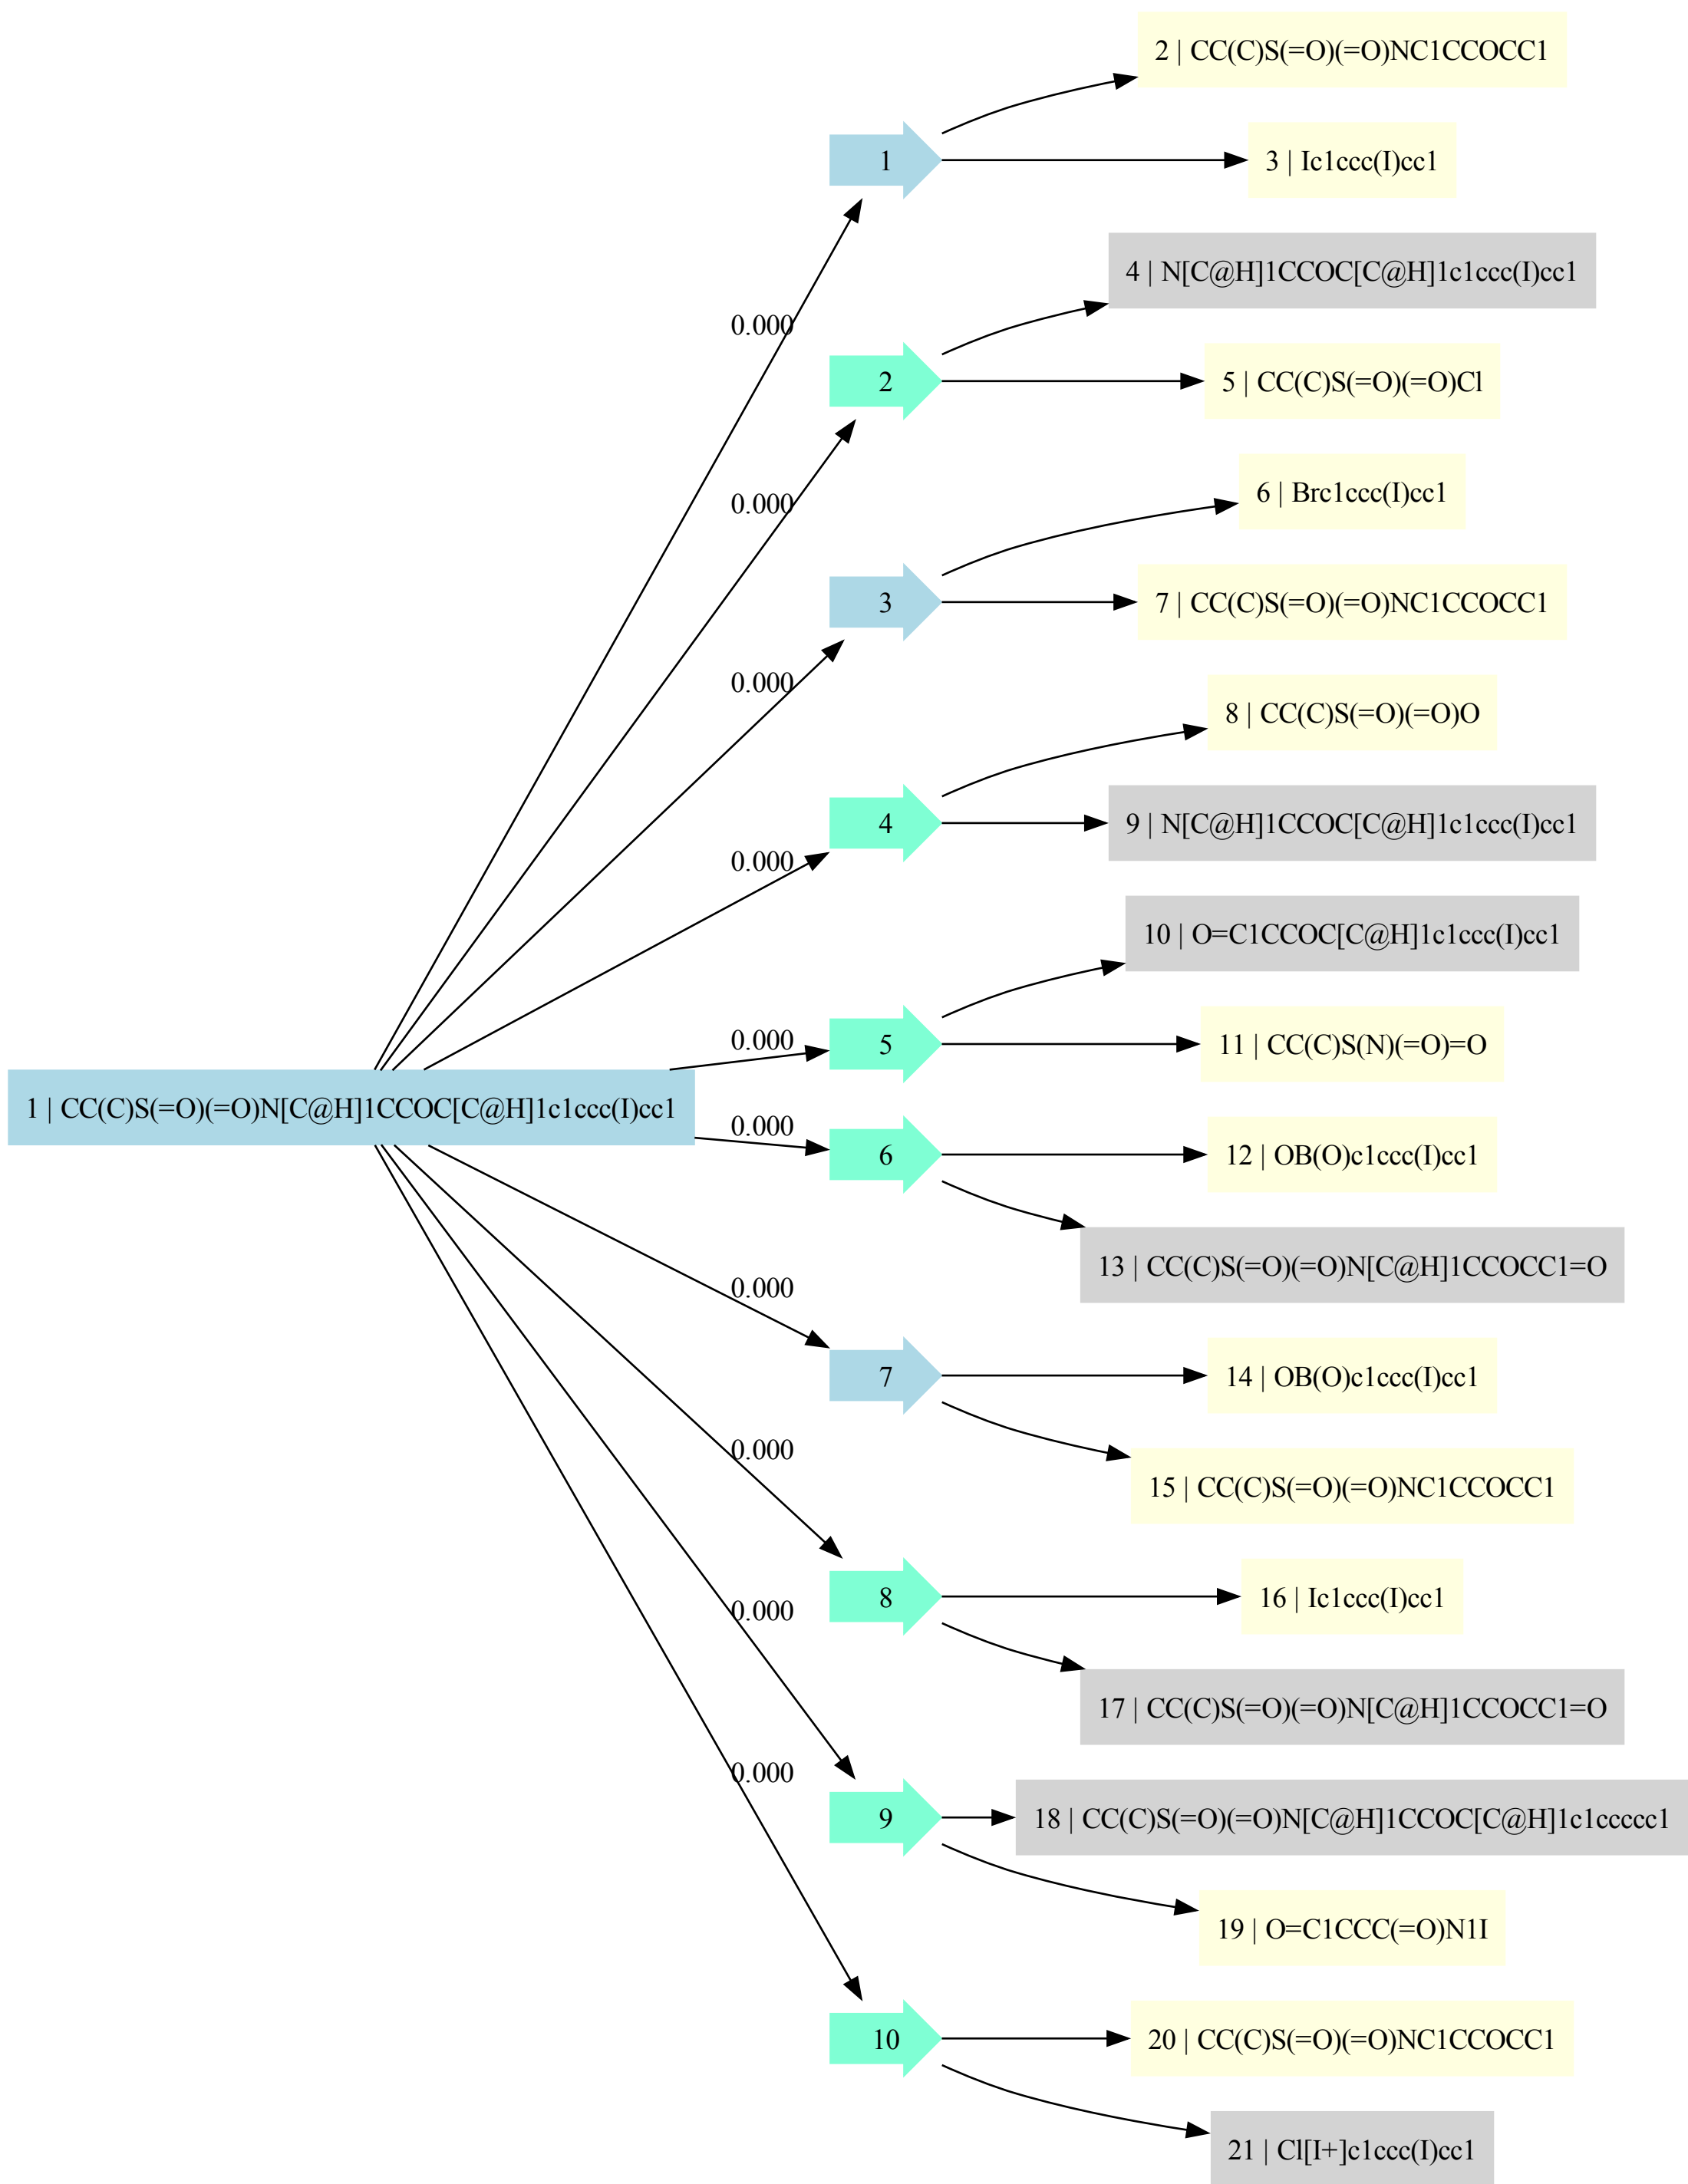

Supplement: supplementary_material [file mol_146_search_tree.pdf › materials9084/retro190_solutions/mol_146_search_tree.pdf]

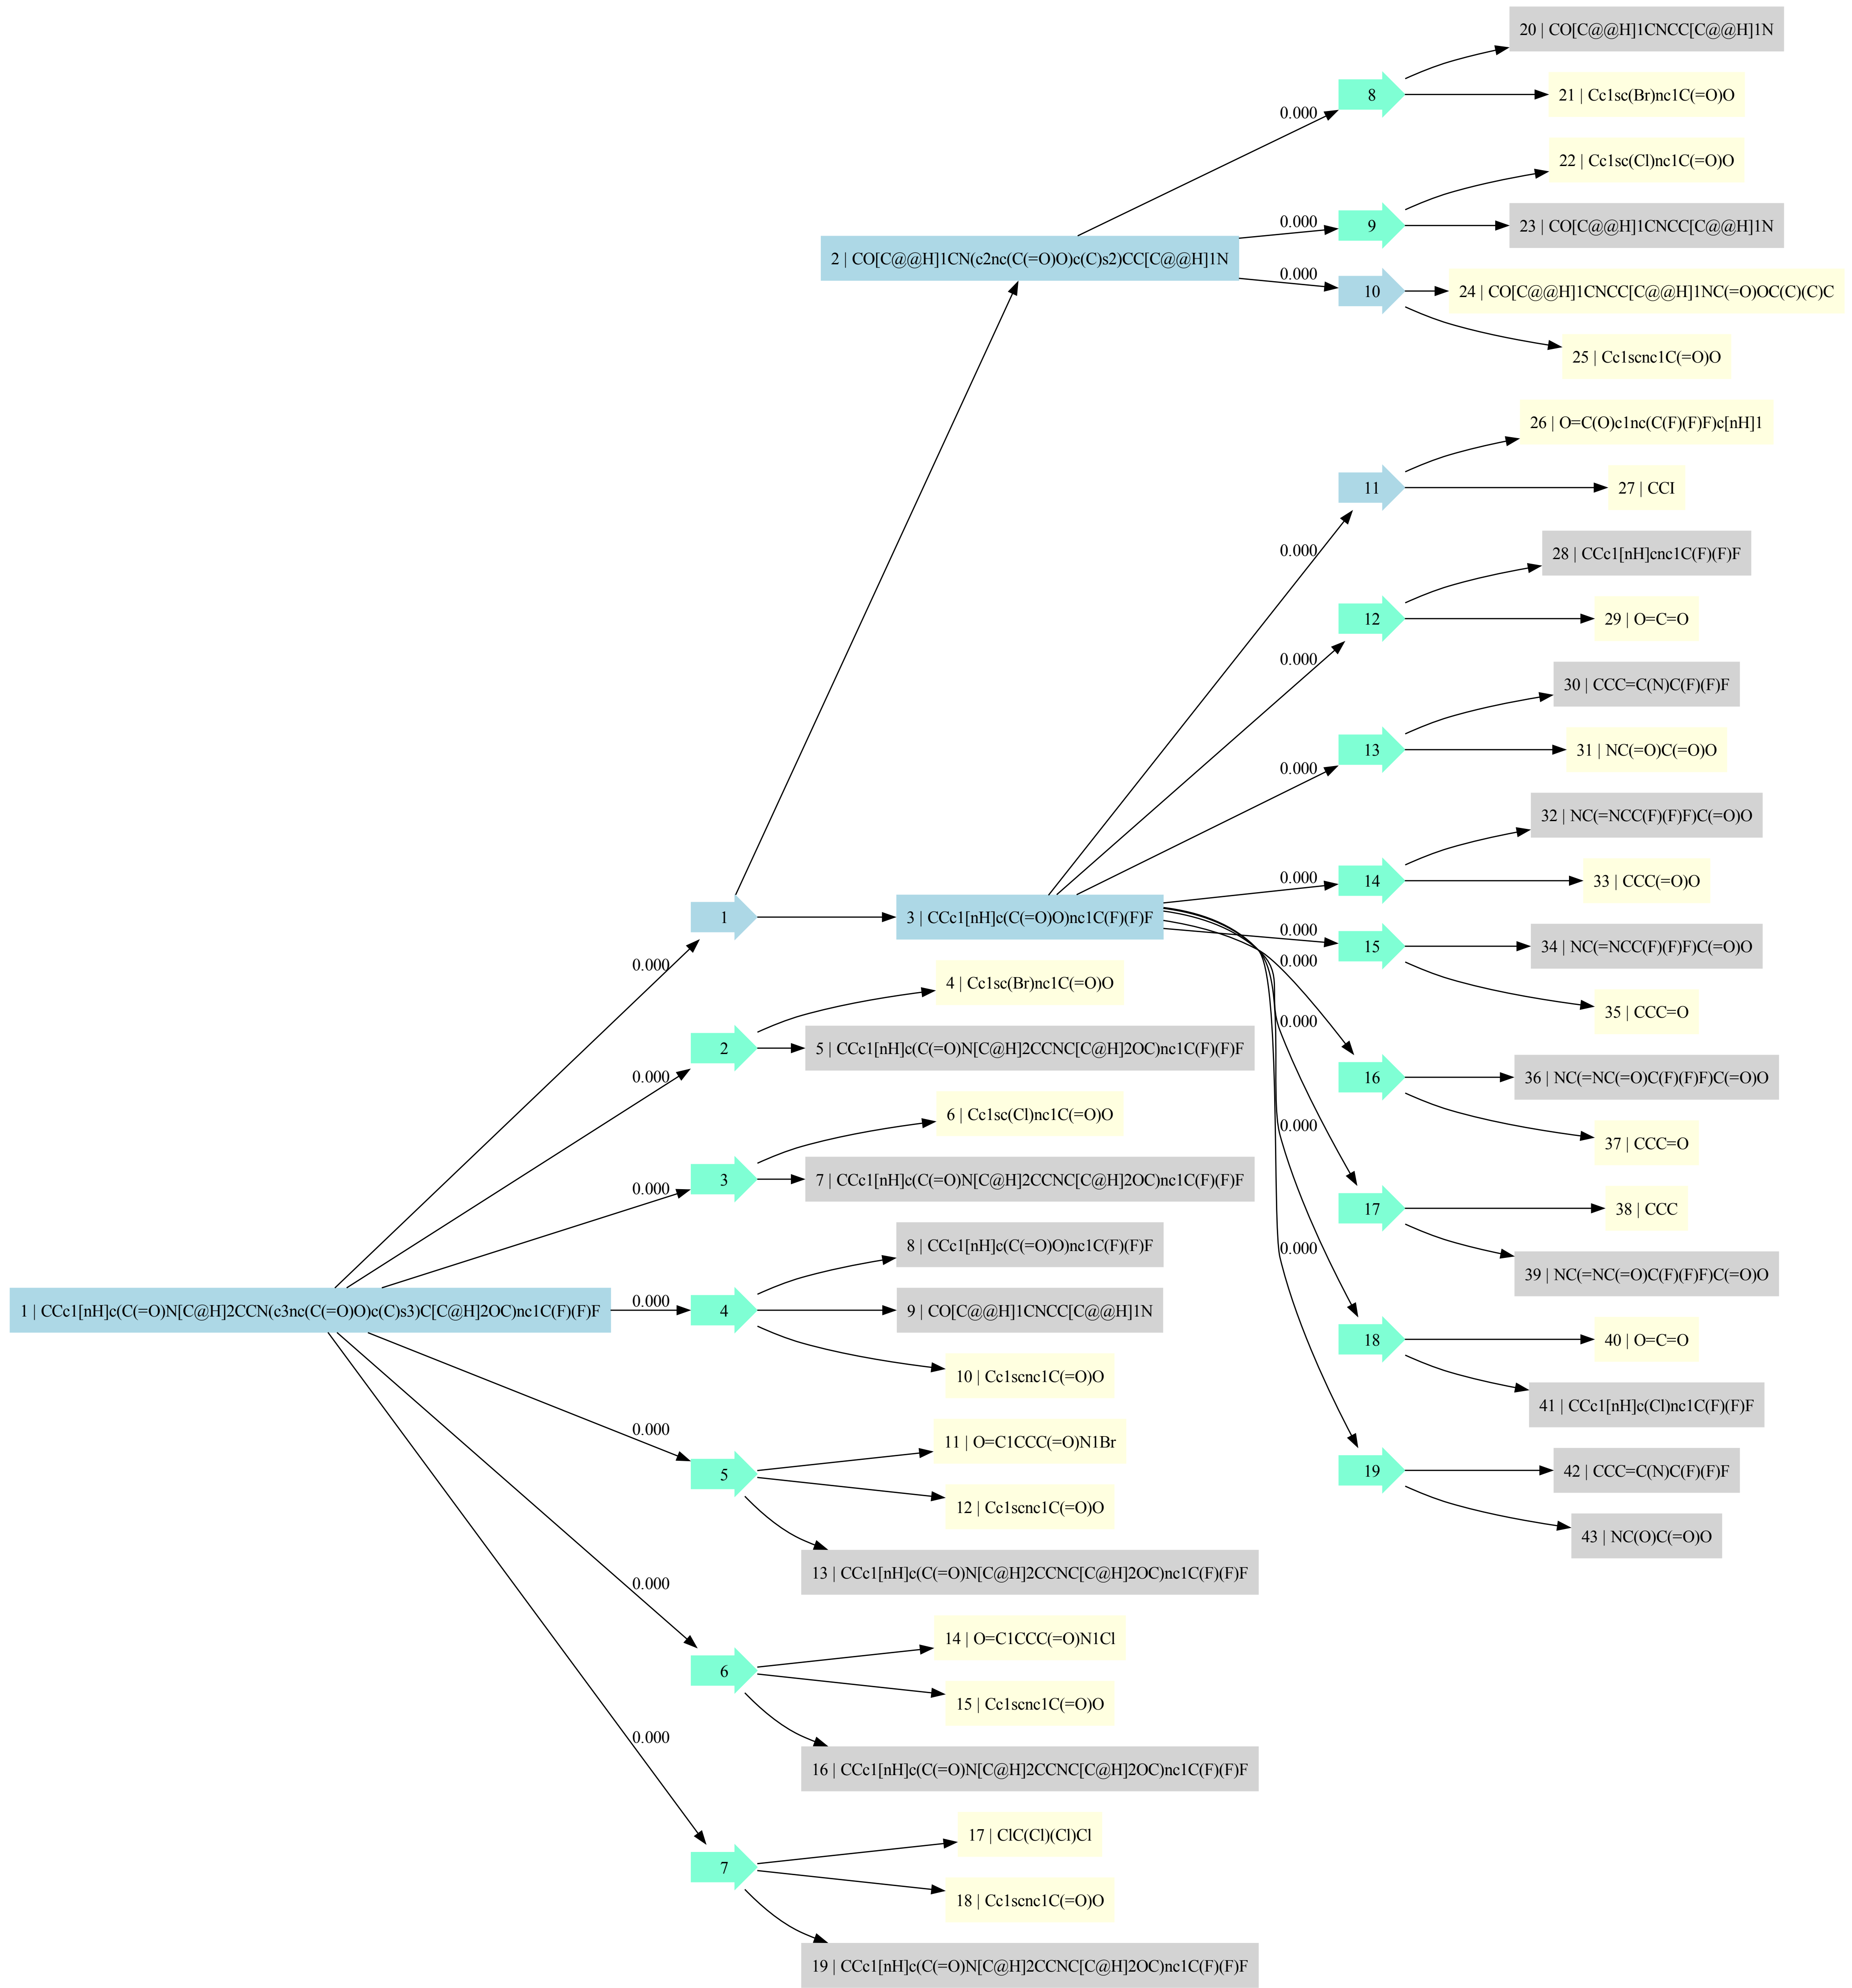

Supplement: supplementary_material [file mol_147_search_tree.pdf › materials9084/retro190_solutions/mol_147_search_tree.pdf]

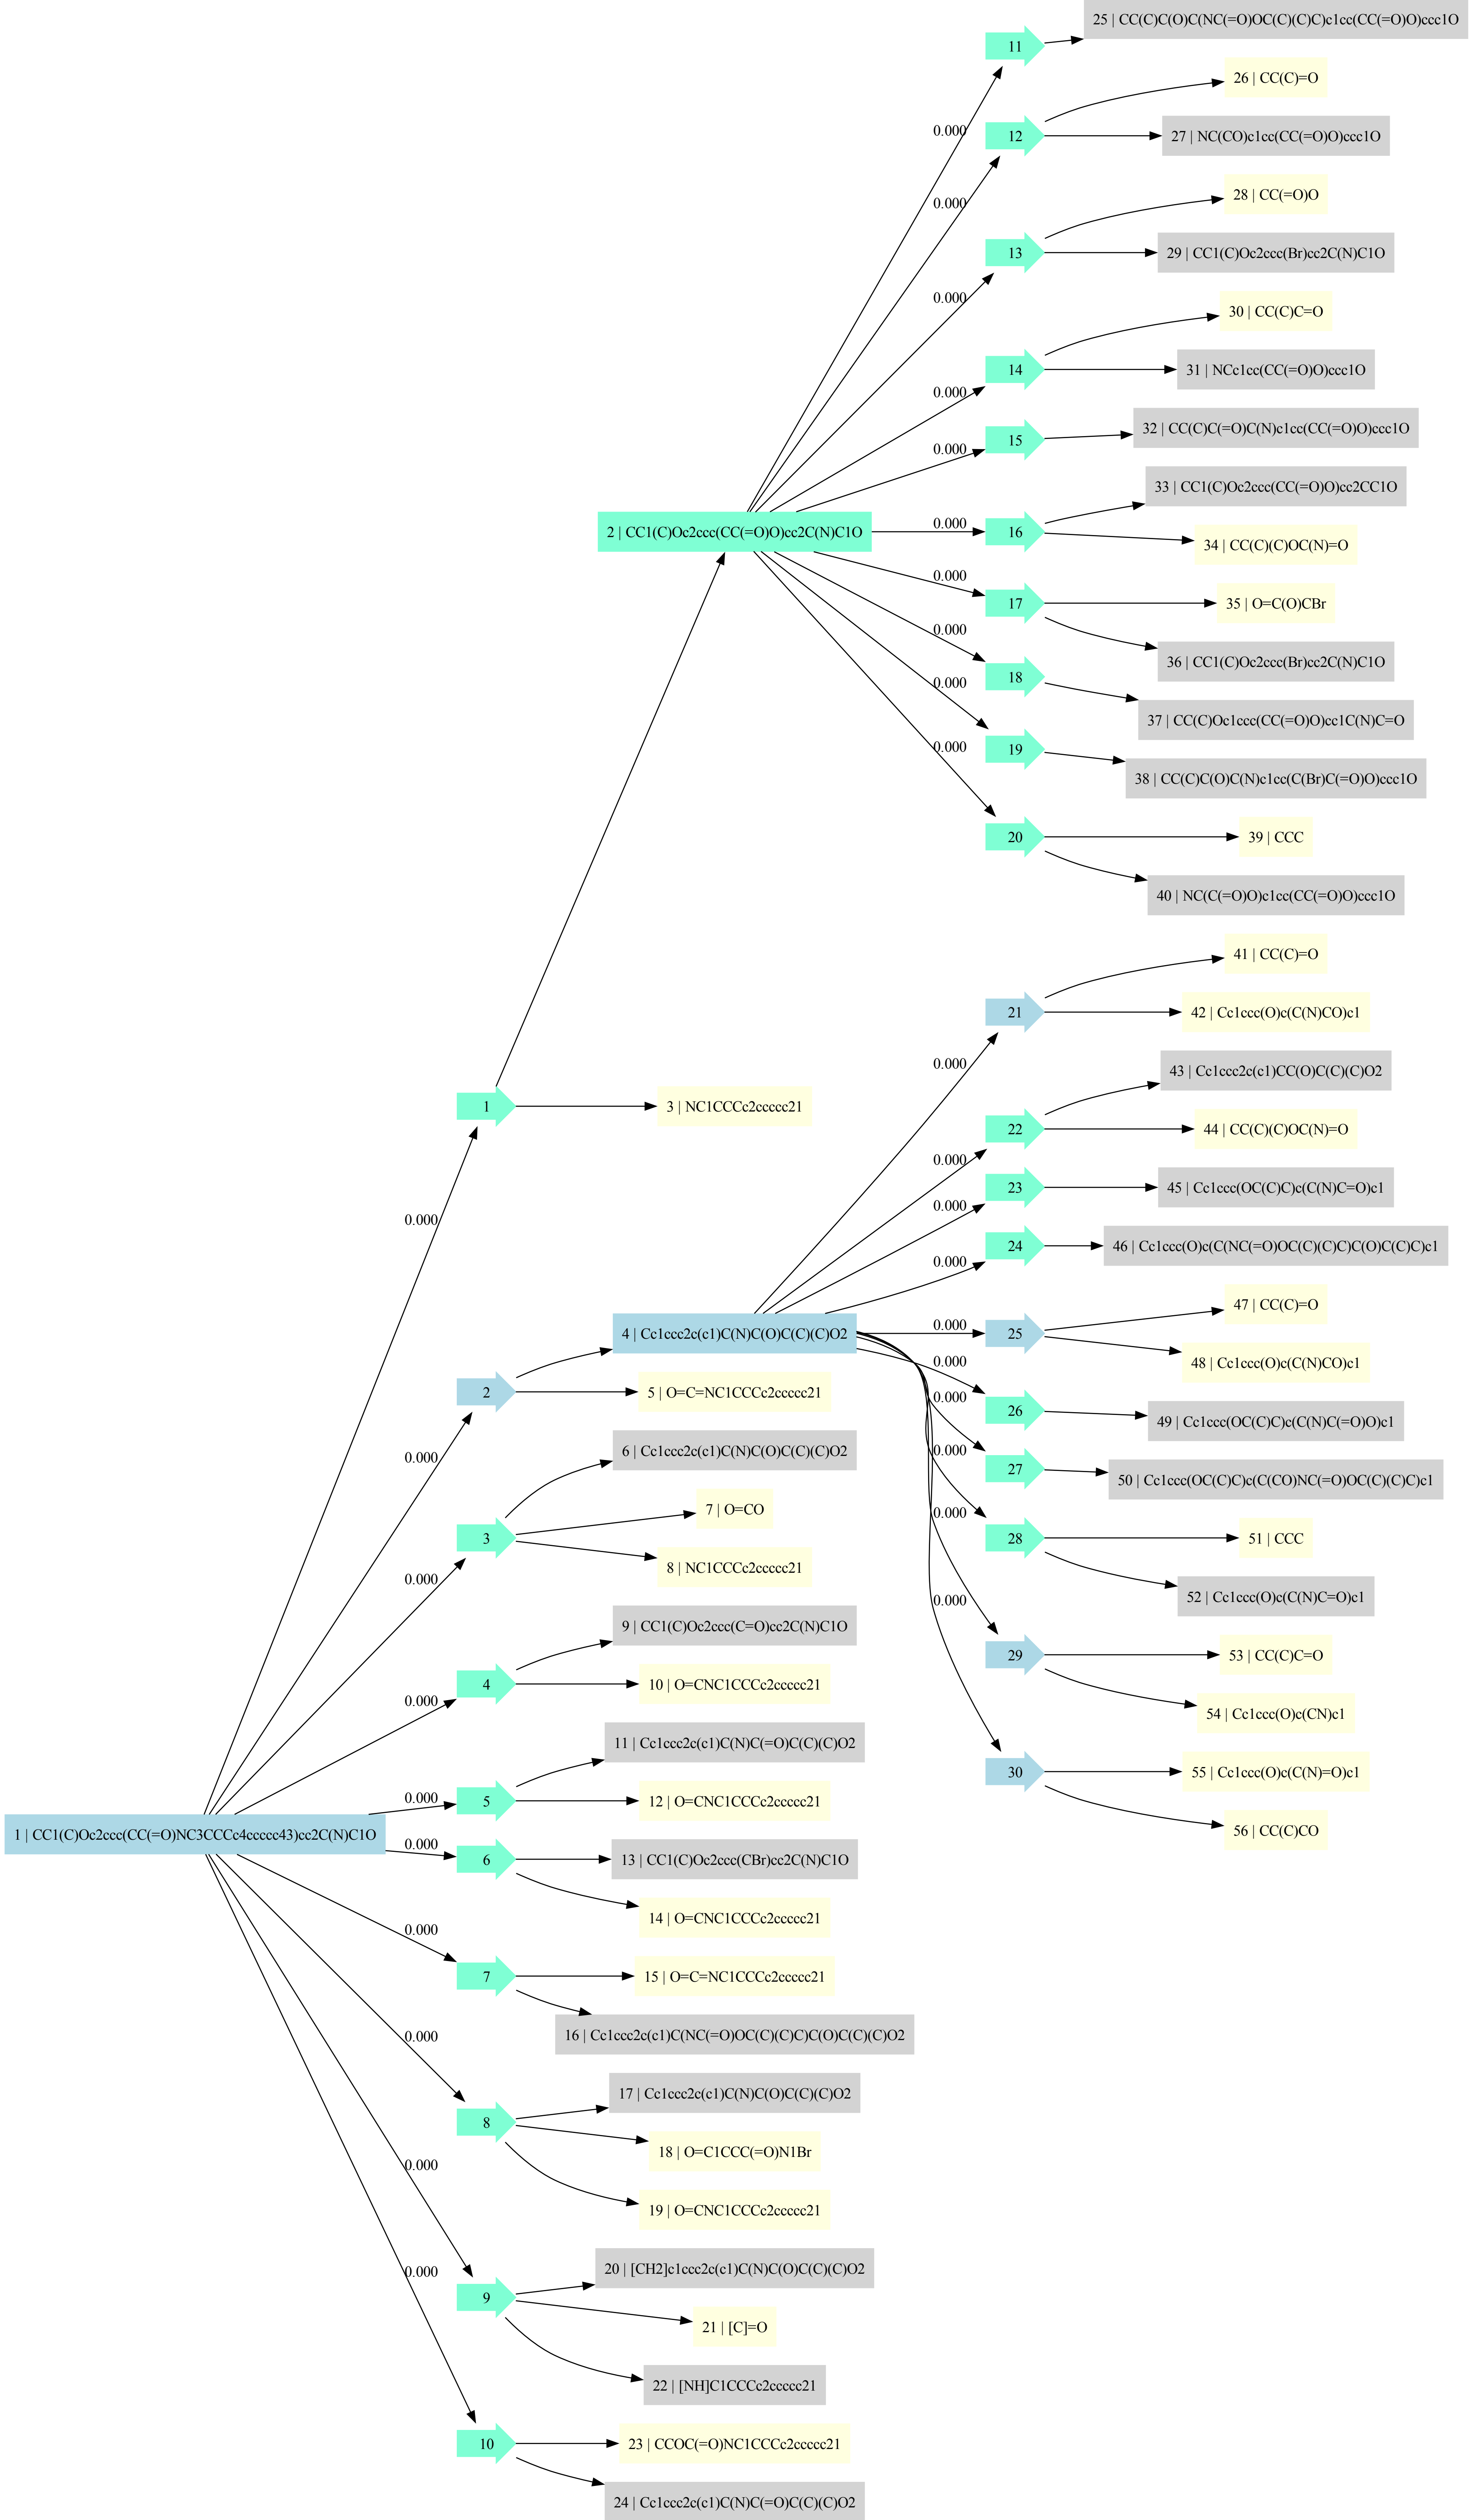

Supplement: supplementary_material [file mol_148_search_tree.pdf › materials9084/retro190_solutions/mol_148_search_tree.pdf]

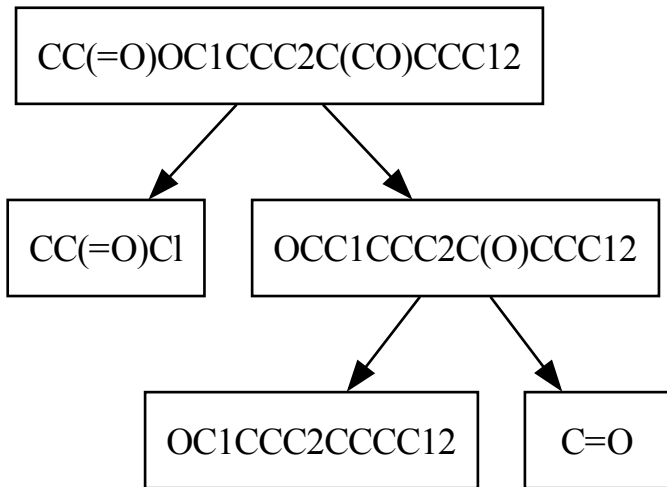

Supplement: supplementary_material [file mol_149_route_optimal.pdf › materials9084/retro190_solutions/mol_149_route_optimal.pdf]

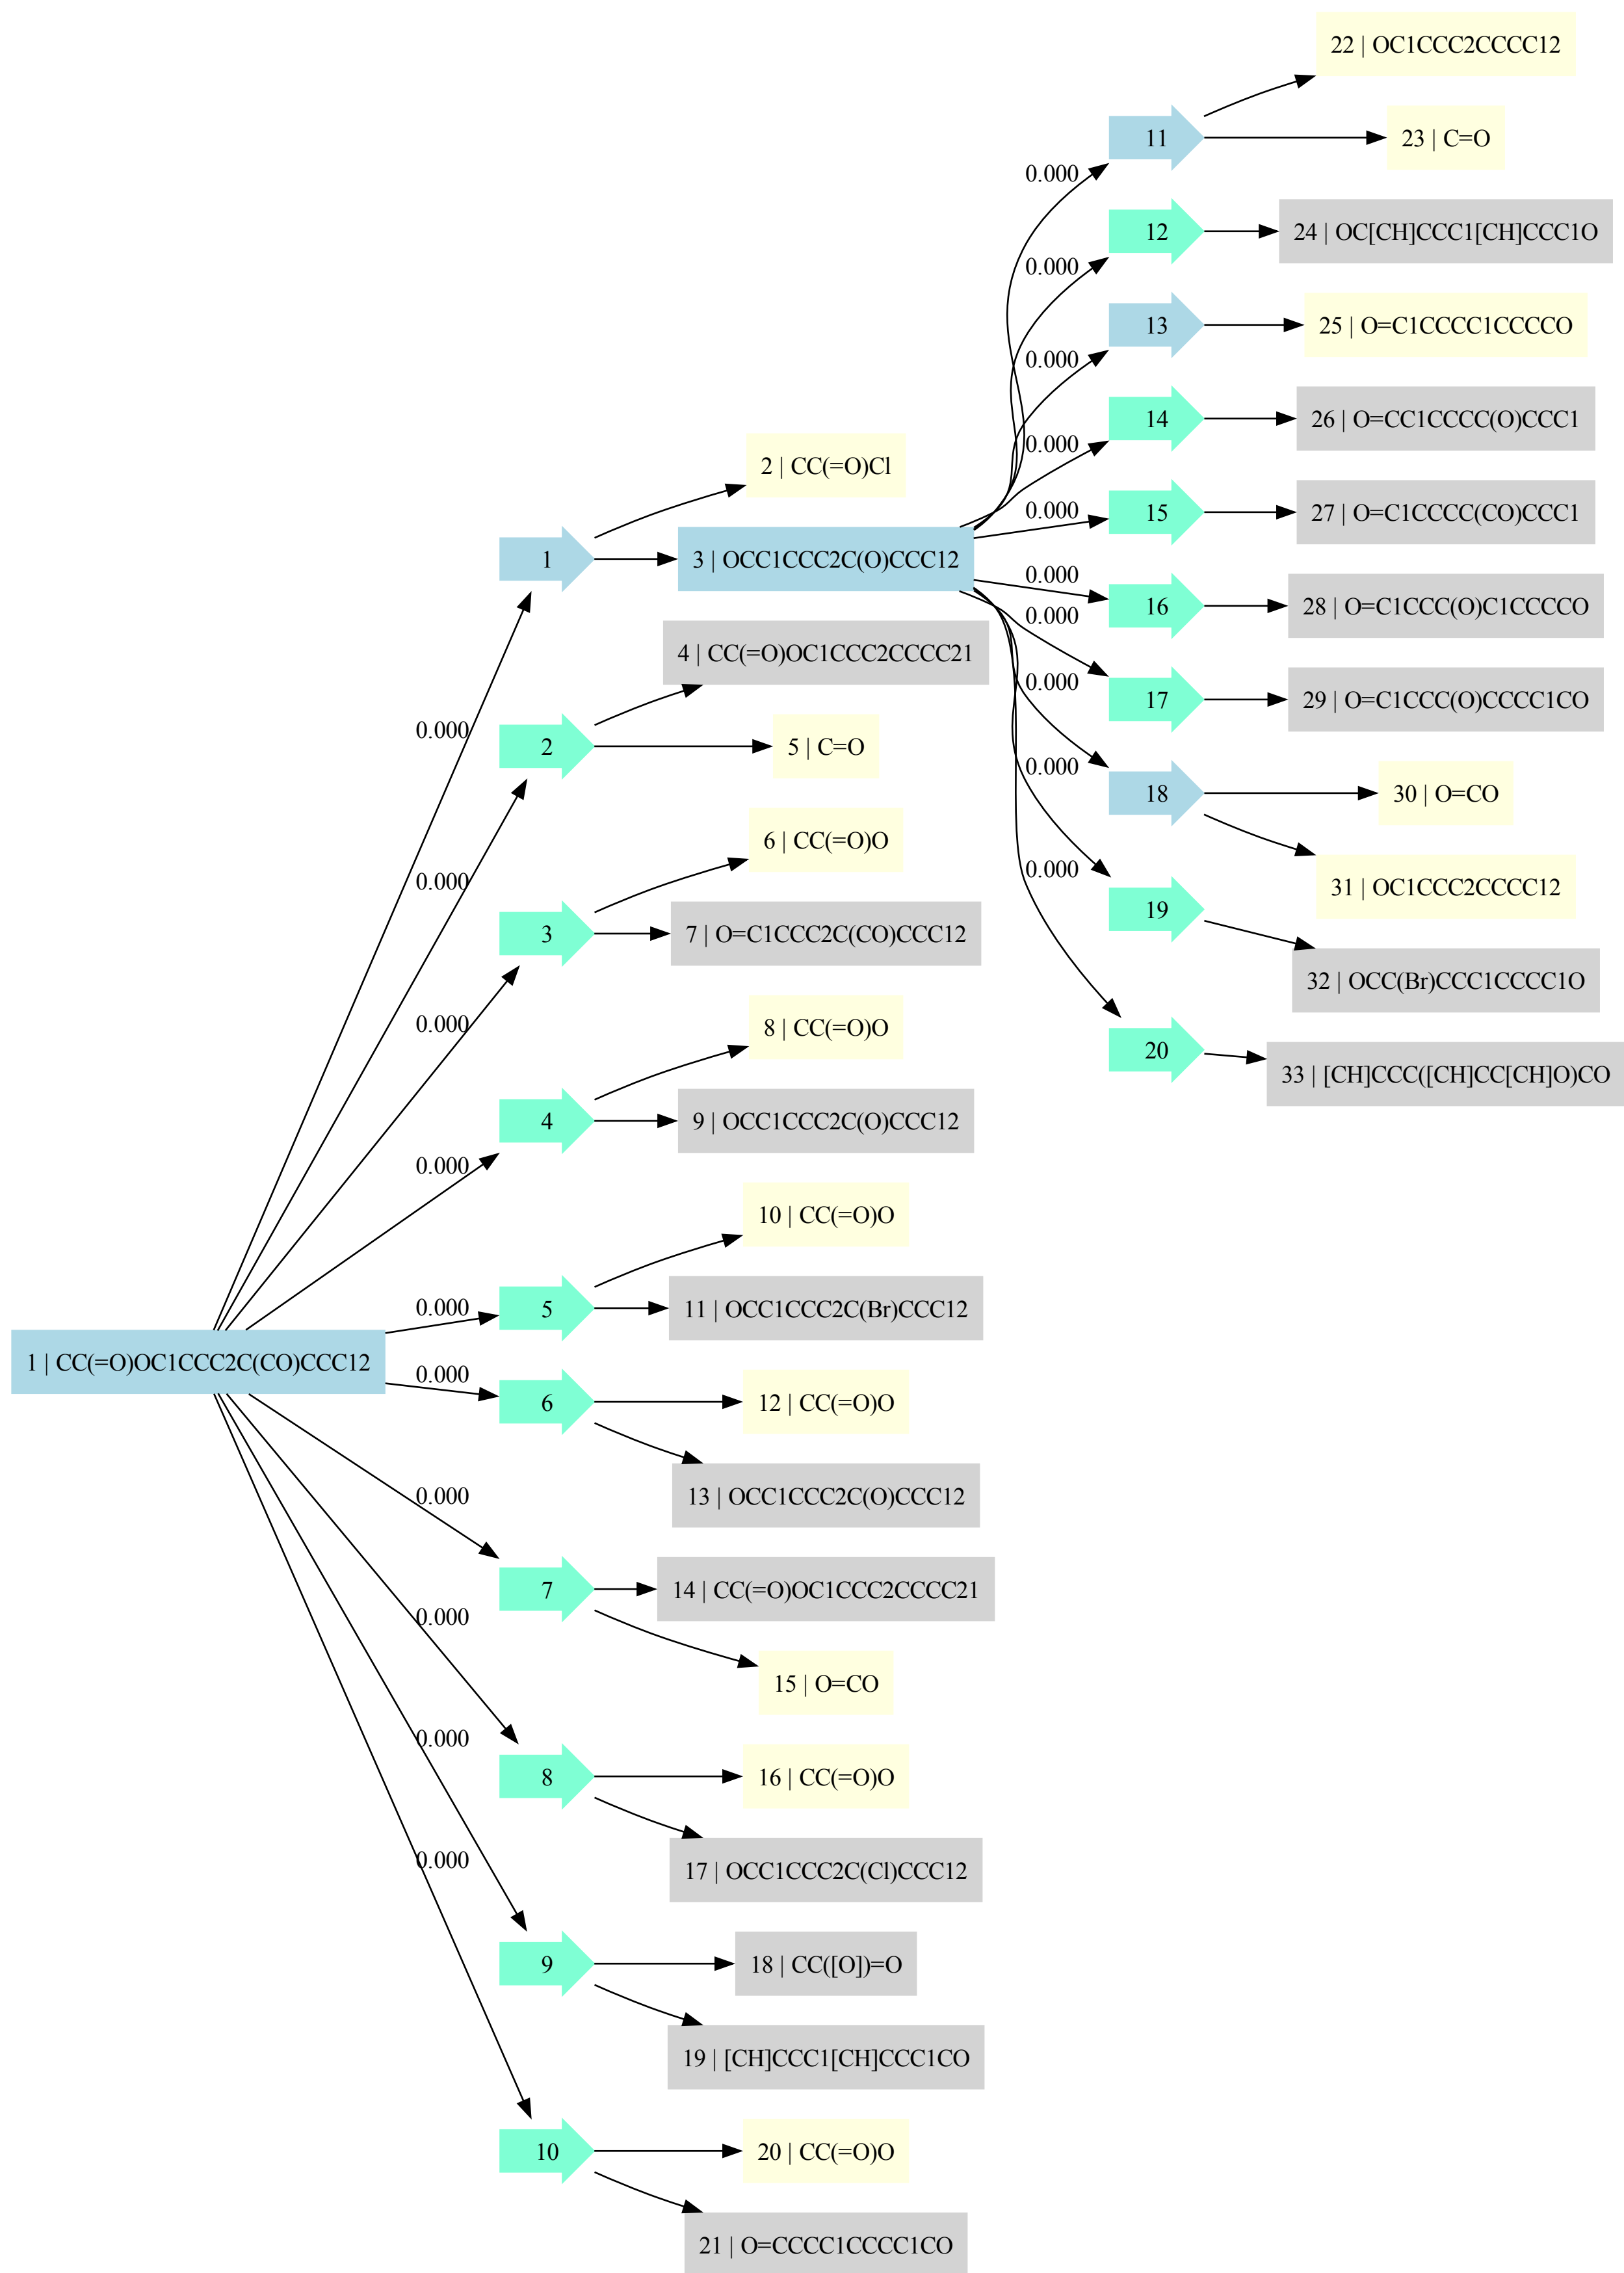

Supplement: supplementary_material [file mol_149_search_tree.pdf › materials9084/retro190_solutions/mol_149_search_tree.pdf]

CC(=O)NC[C@H]1CC[C@@H](C(=O)Nc2cccc(OC(F)(F)F)c2)N1C(=O)OCc1ccccc1

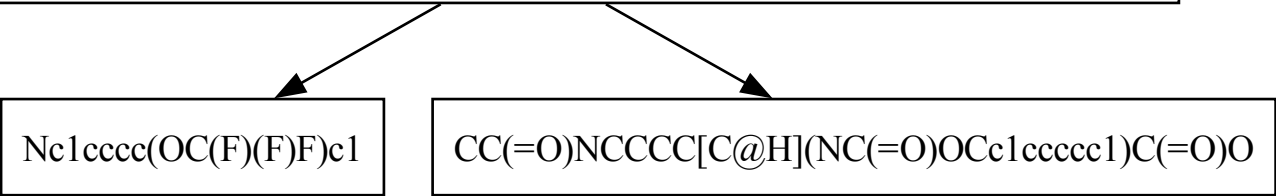

Nc1cccc(OC(F)(F)F)c1

CC(=O)NCCCC[C@H](NC(=O)OCc1ccccc1)C(=O)O

Supplement: supplementary_material [file mol_14_route_optimal.pdf › materials9084/retro190_solutions/mol_14_route_optimal.pdf]

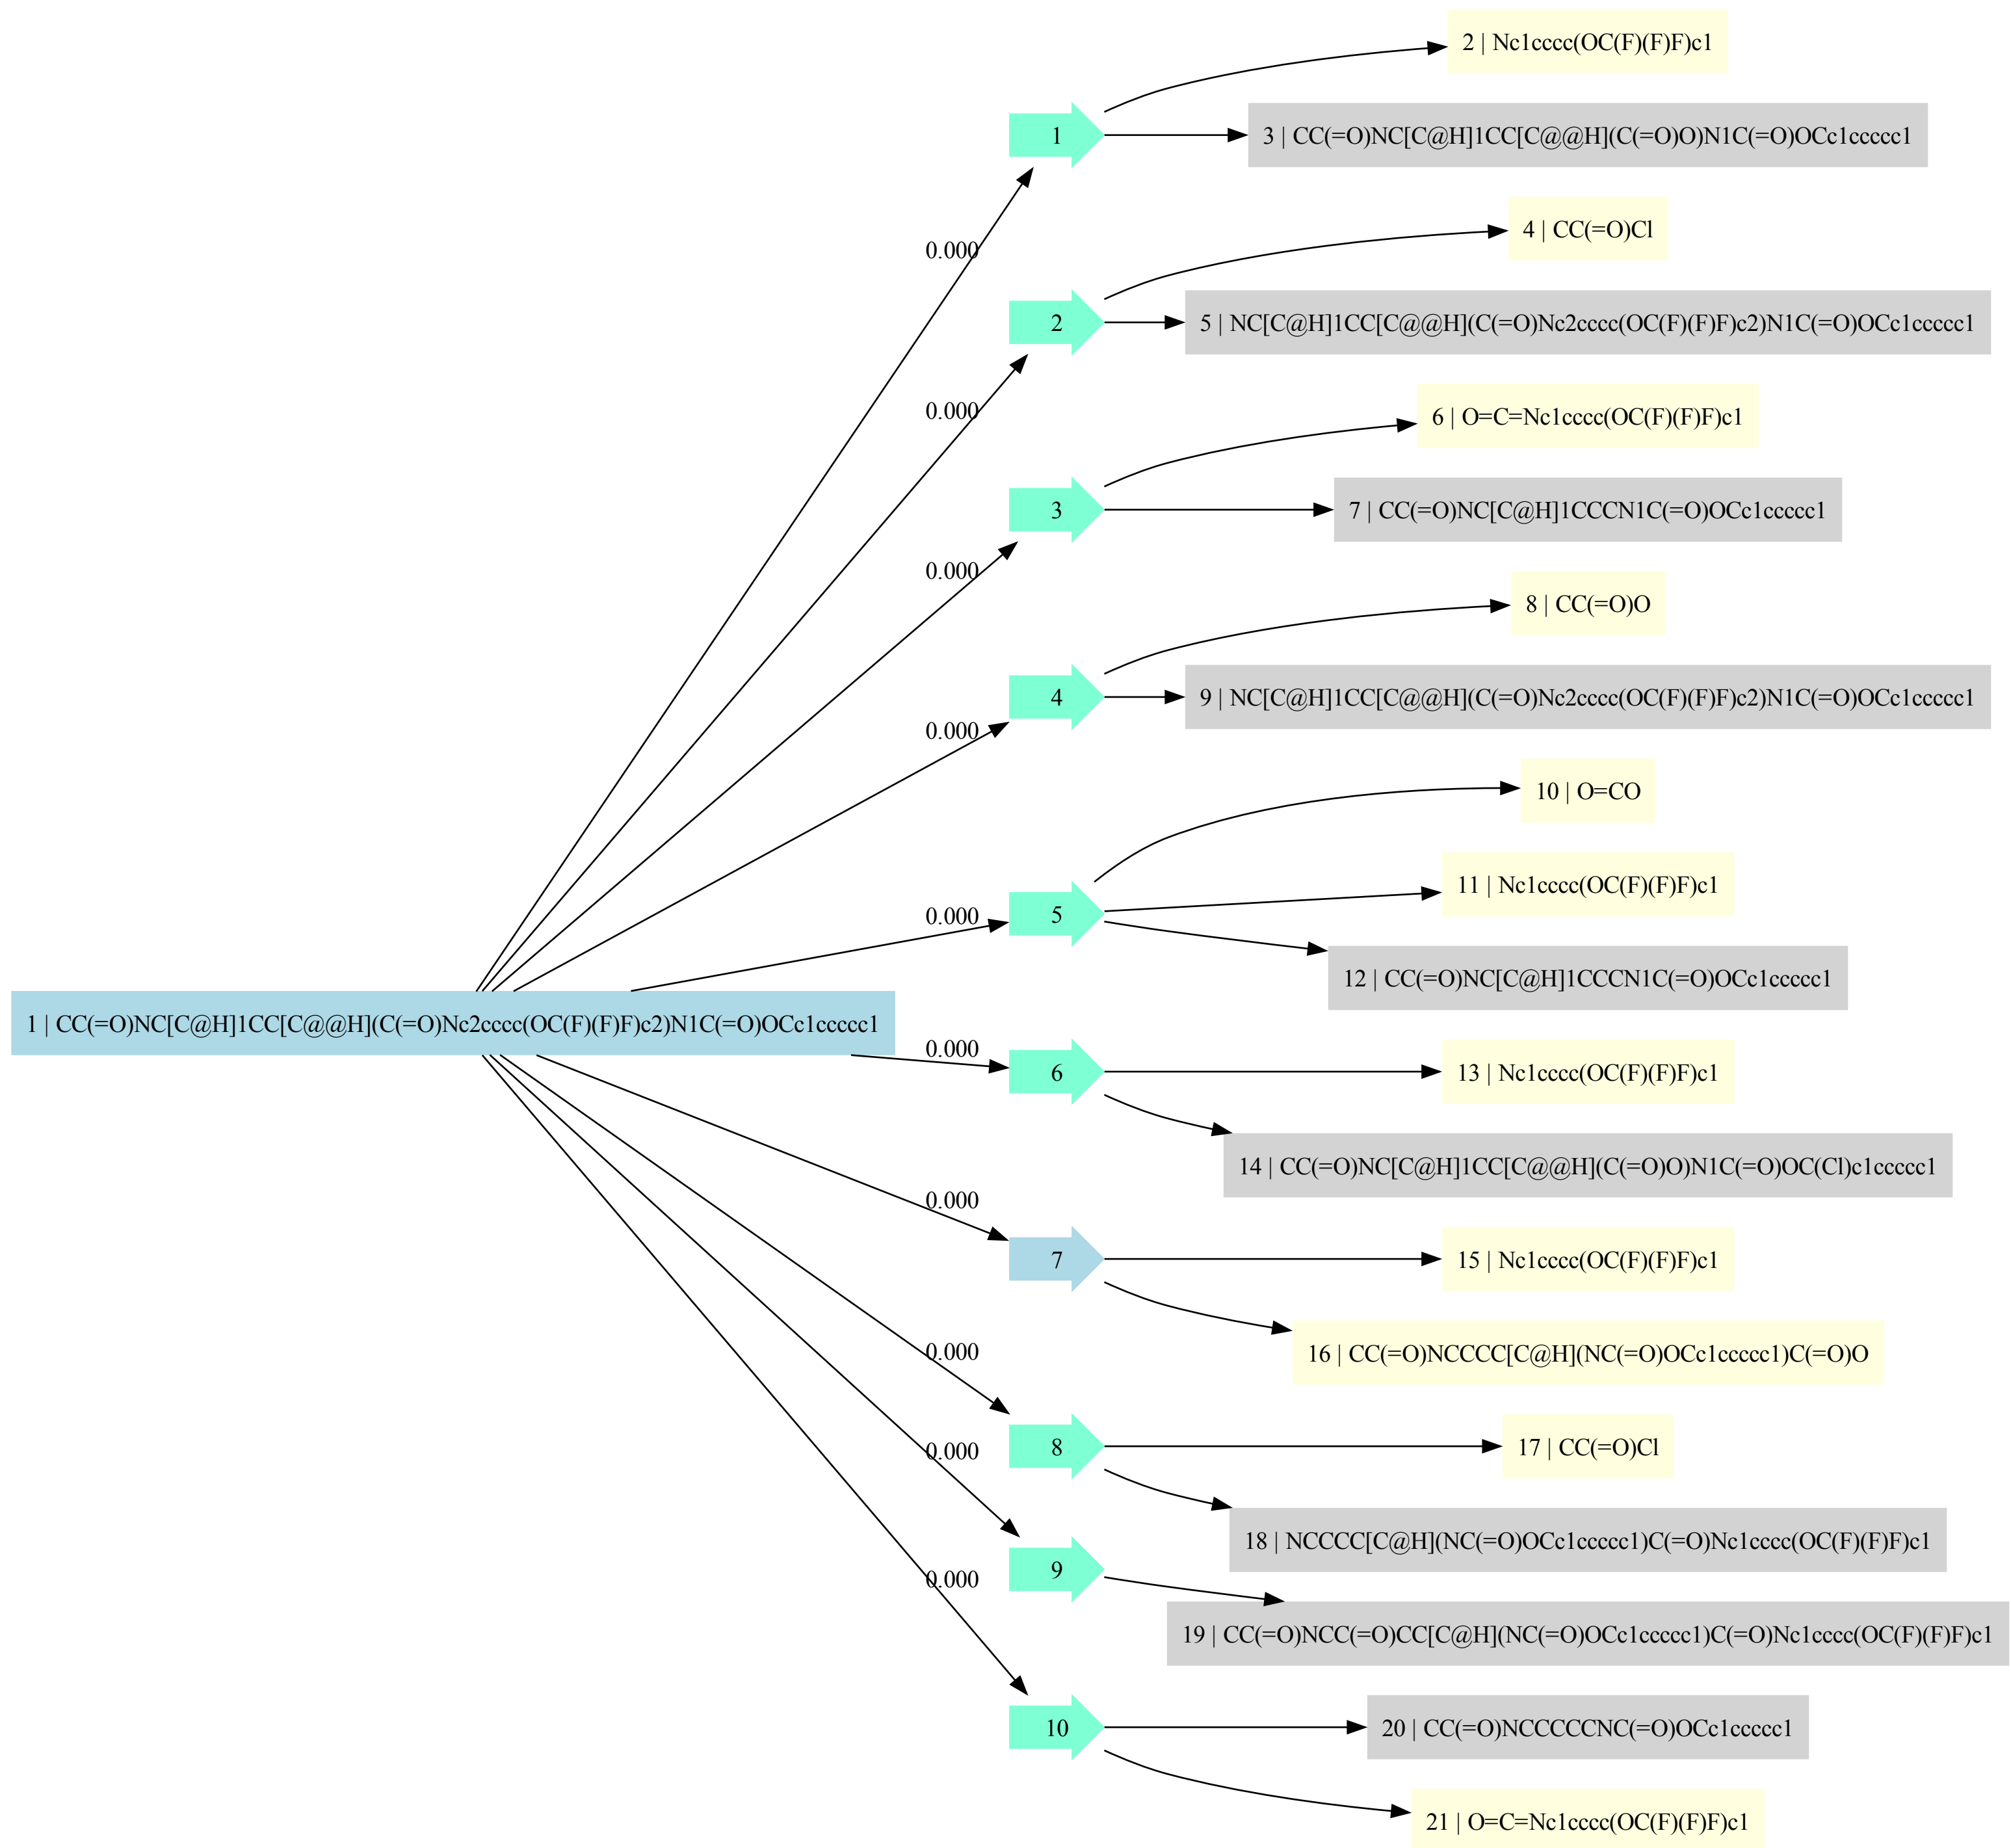

Supplement: supplementary_material [file mol_14_search_tree.pdf › materials9084/retro190_solutions/mol_14_search_tree.pdf]

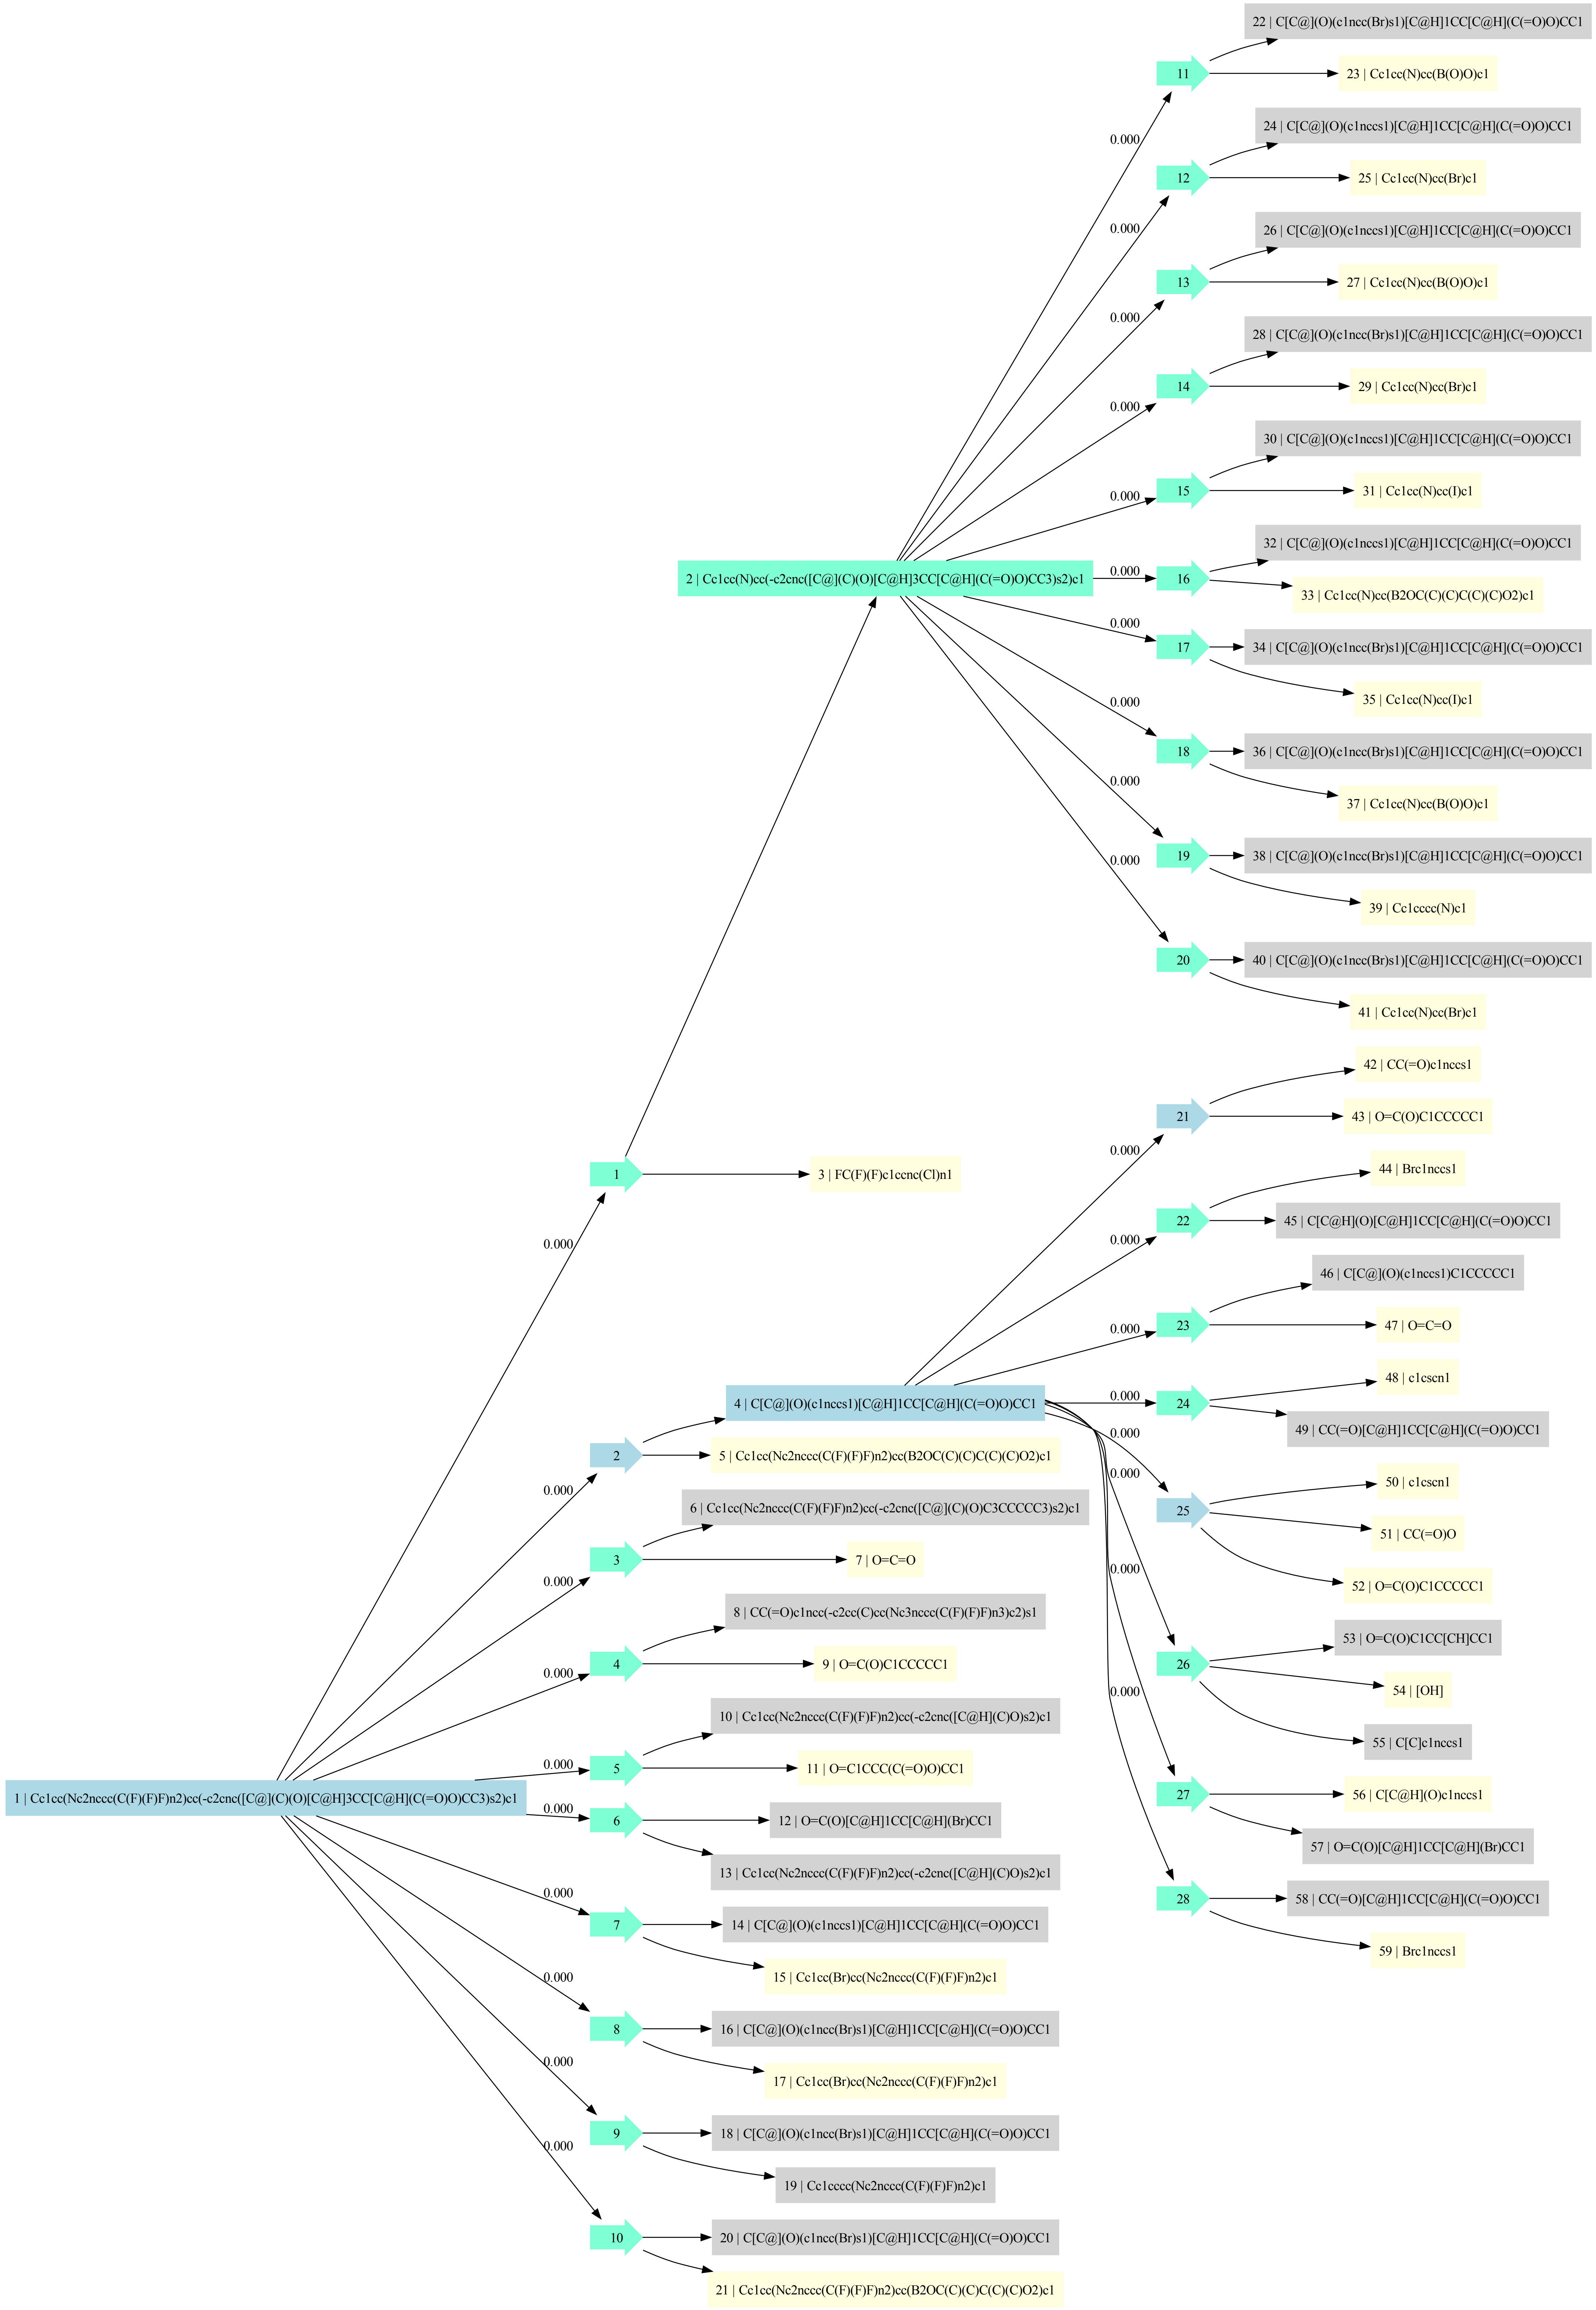

Supplement: supplementary_material [file mol_150_search_tree.pdf › materials9084/retro190_solutions/mol_150_search_tree.pdf]

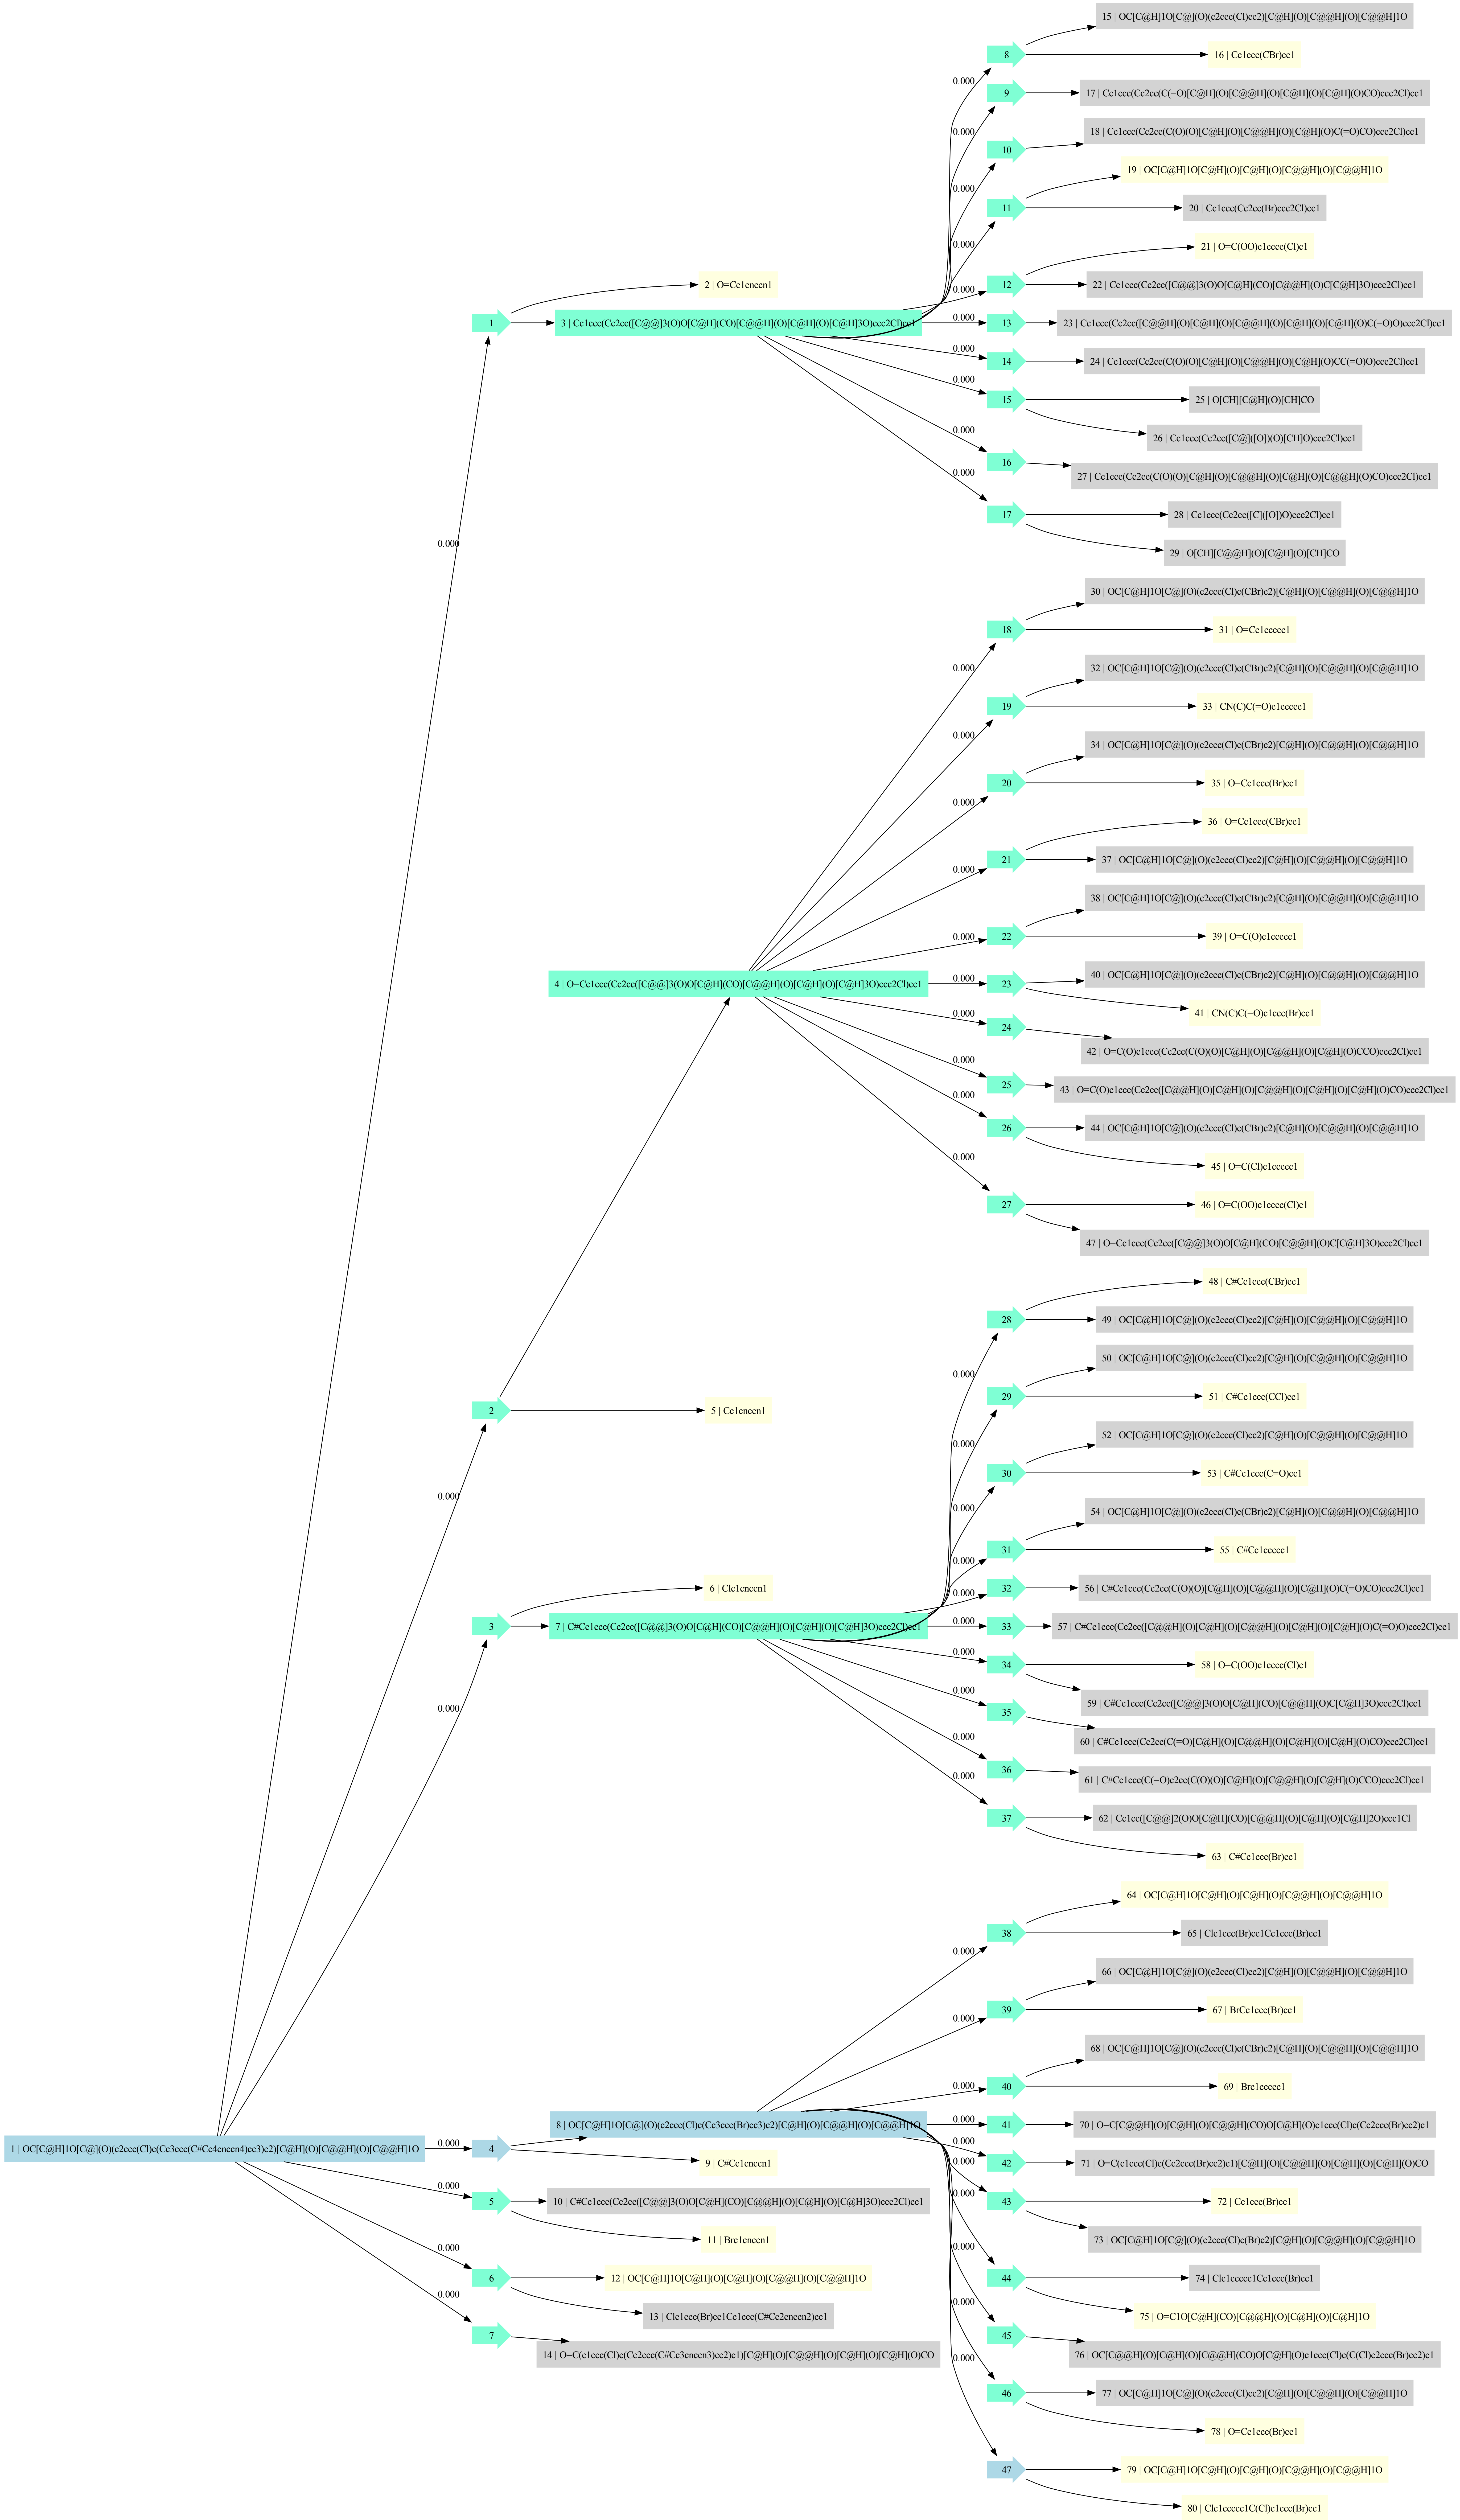

Supplement: supplementary_material [file mol_152_search_tree.pdf › materials9084/retro190_solutions/mol_152_search_tree.pdf]

O=[N+]([O-])c1ccc(OC2(S(=O)(=O)c3ccccc3)CC2)nc1Cl

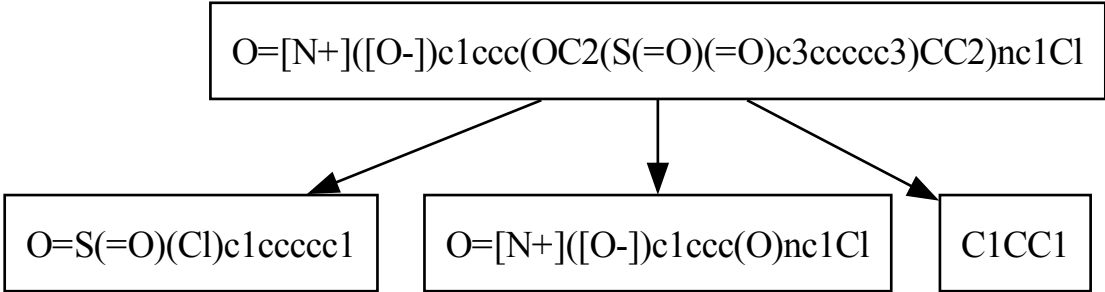

O=S(=O)(Cl)c1ccccc1

O=[N+]([O-])c1ccc(O)nc1Cl

C1CC1

Supplement: supplementary_material [file mol_153_route_optimal.pdf › materials9084/retro190_solutions/mol_153_route_optimal.pdf]

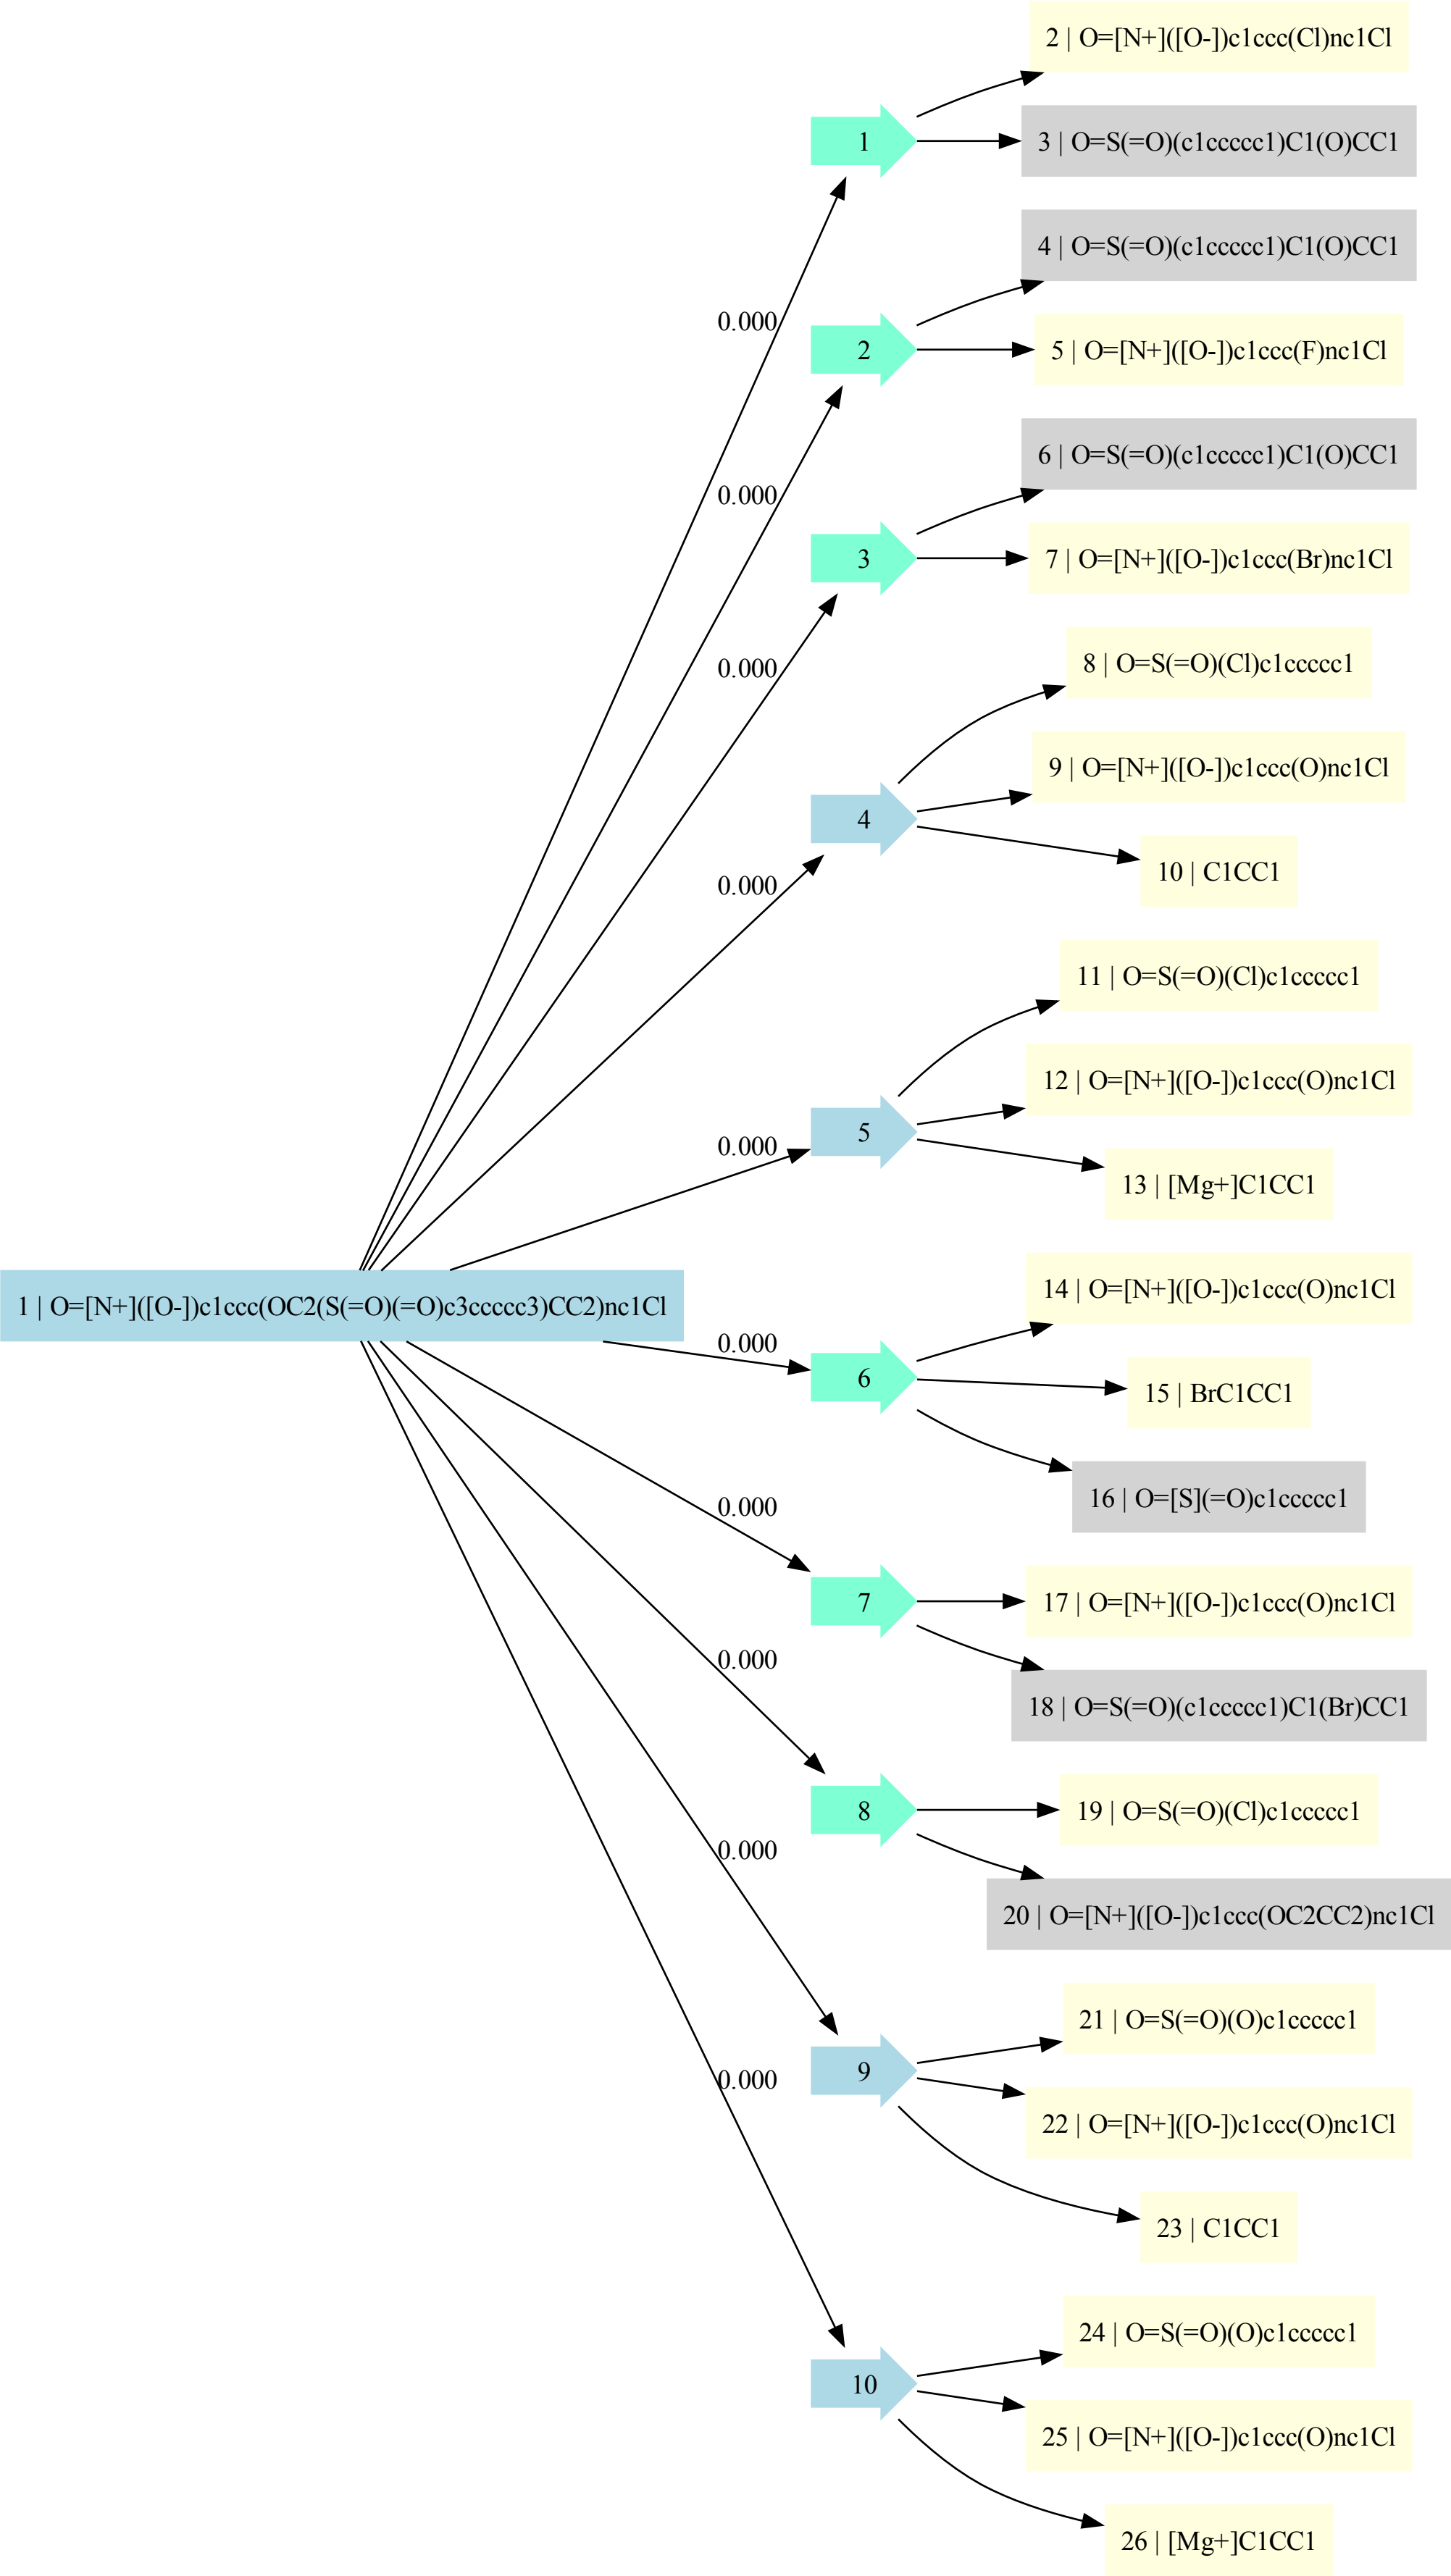

Supplement: supplementary_material [file mol_153_search_tree.pdf › materials9084/retro190_solutions/mol_153_search_tree.pdf]

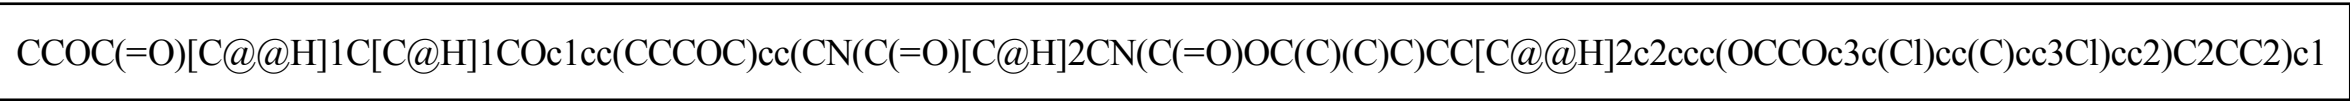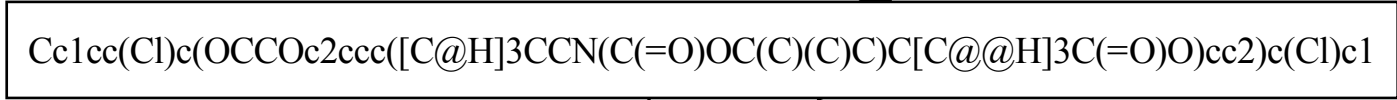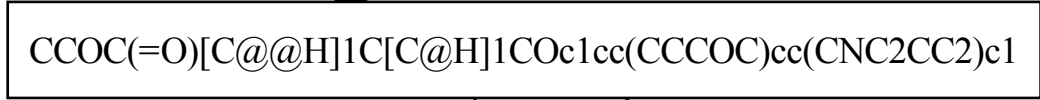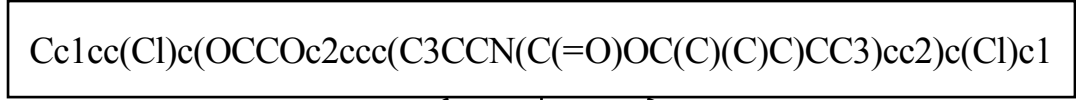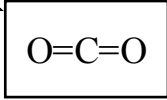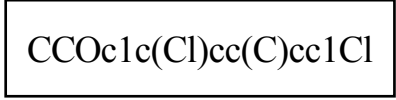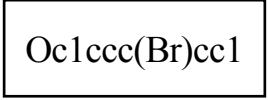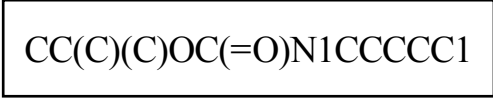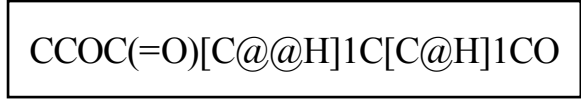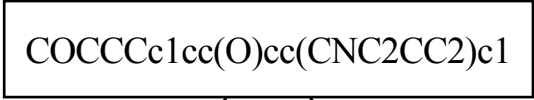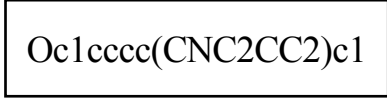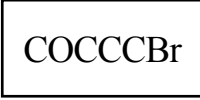

Supplement: supplementary_material [file mol_154_route_optimal.pdf › materials9084/retro190_solutions/mol_154_route_optimal.pdf]

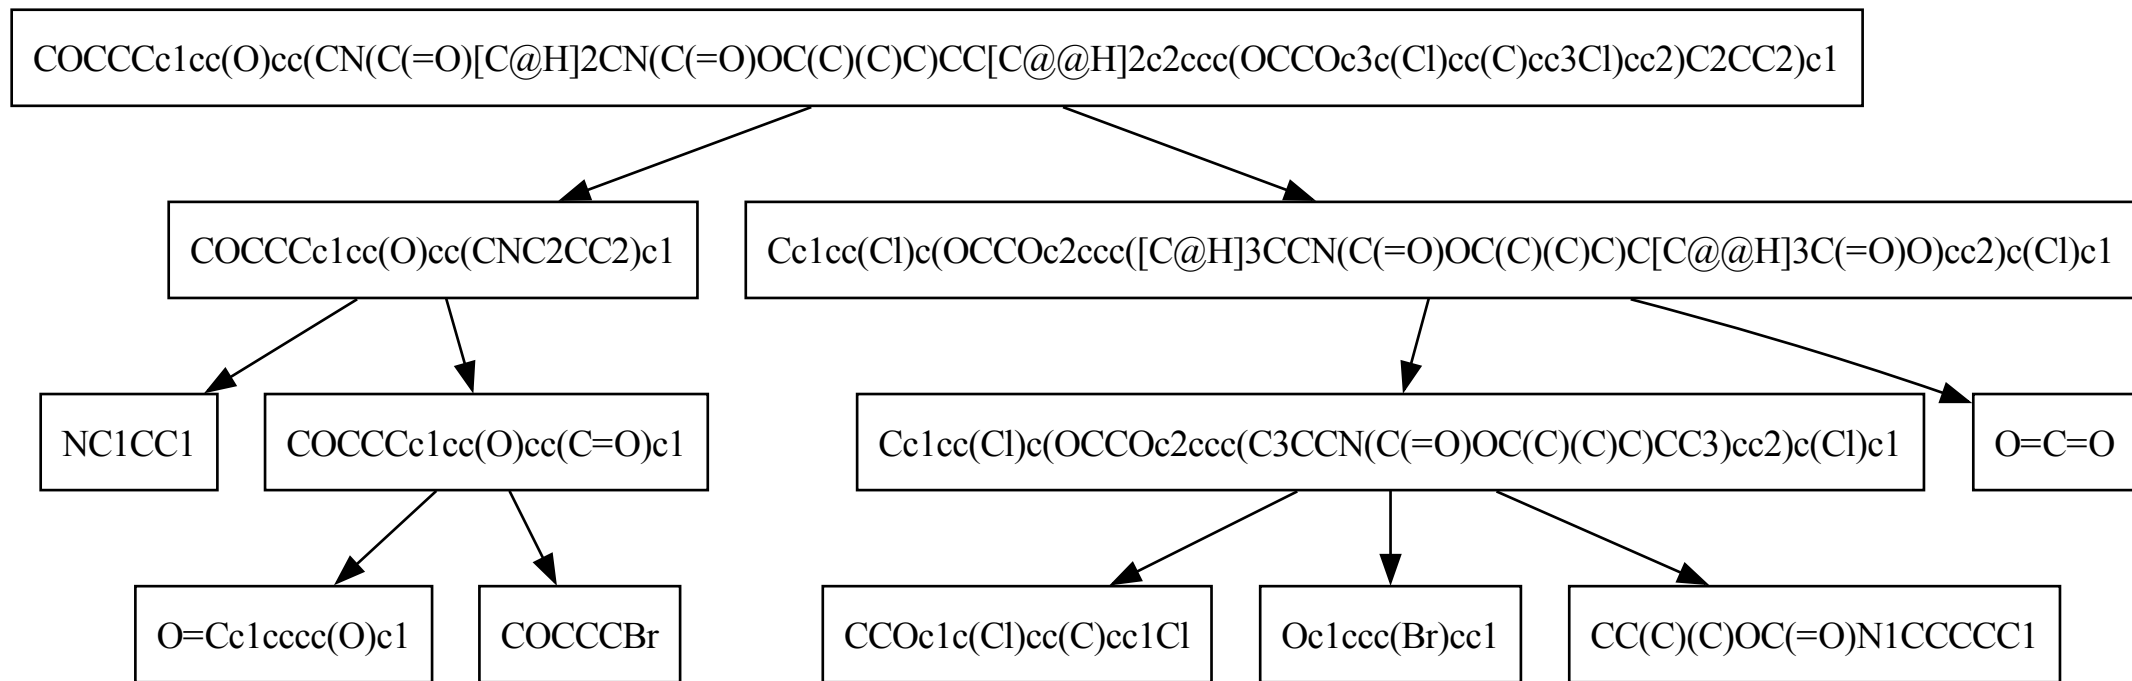

Supplement: supplementary_material [file mol_155_route_optimal.pdf › materials9084/retro190_solutions/mol_155_route_optimal.pdf]

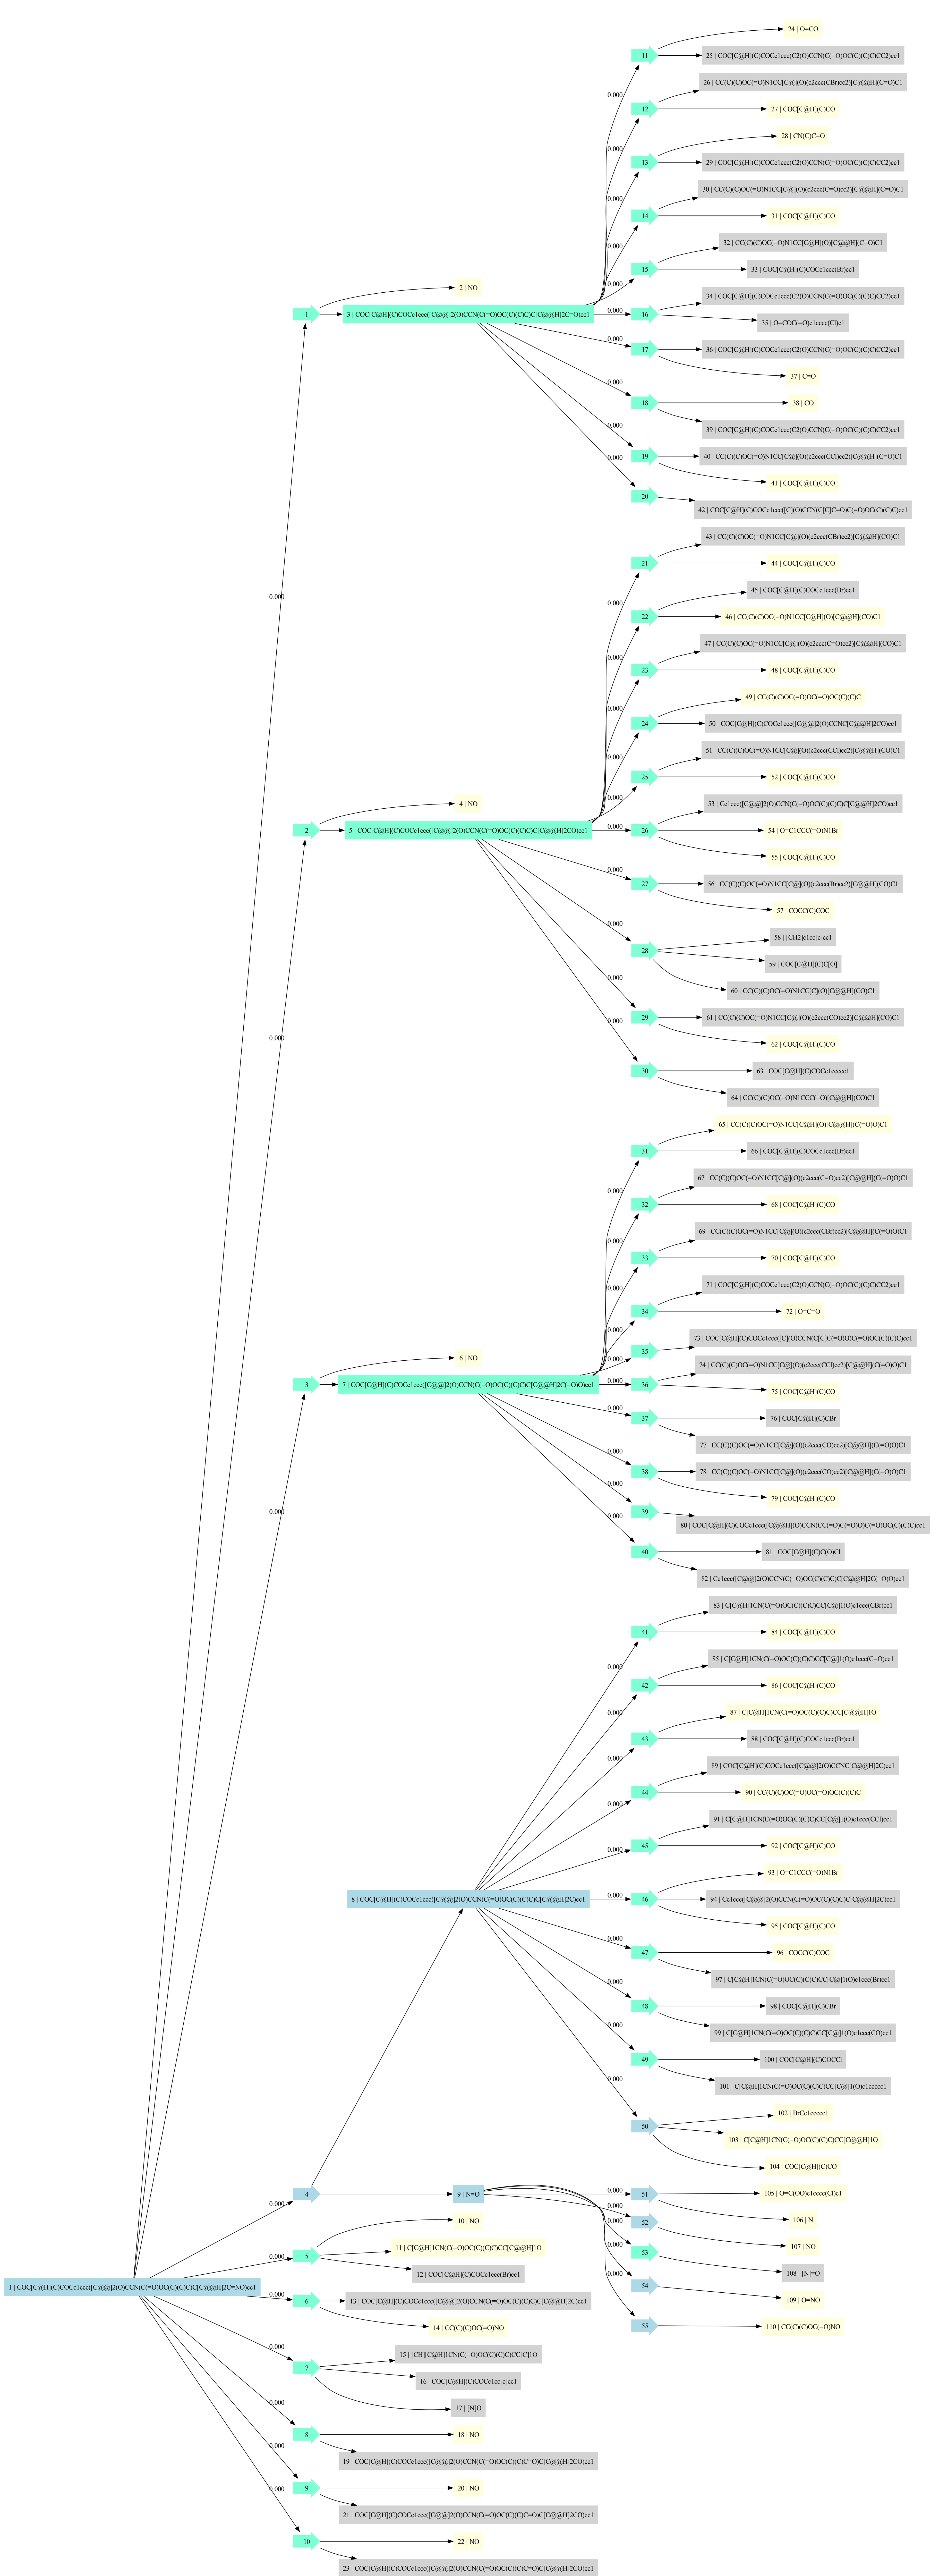

Supplement: supplementary_material [file mol_158_search_tree.pdf › materials9084/retro190_solutions/mol_158_search_tree.pdf]

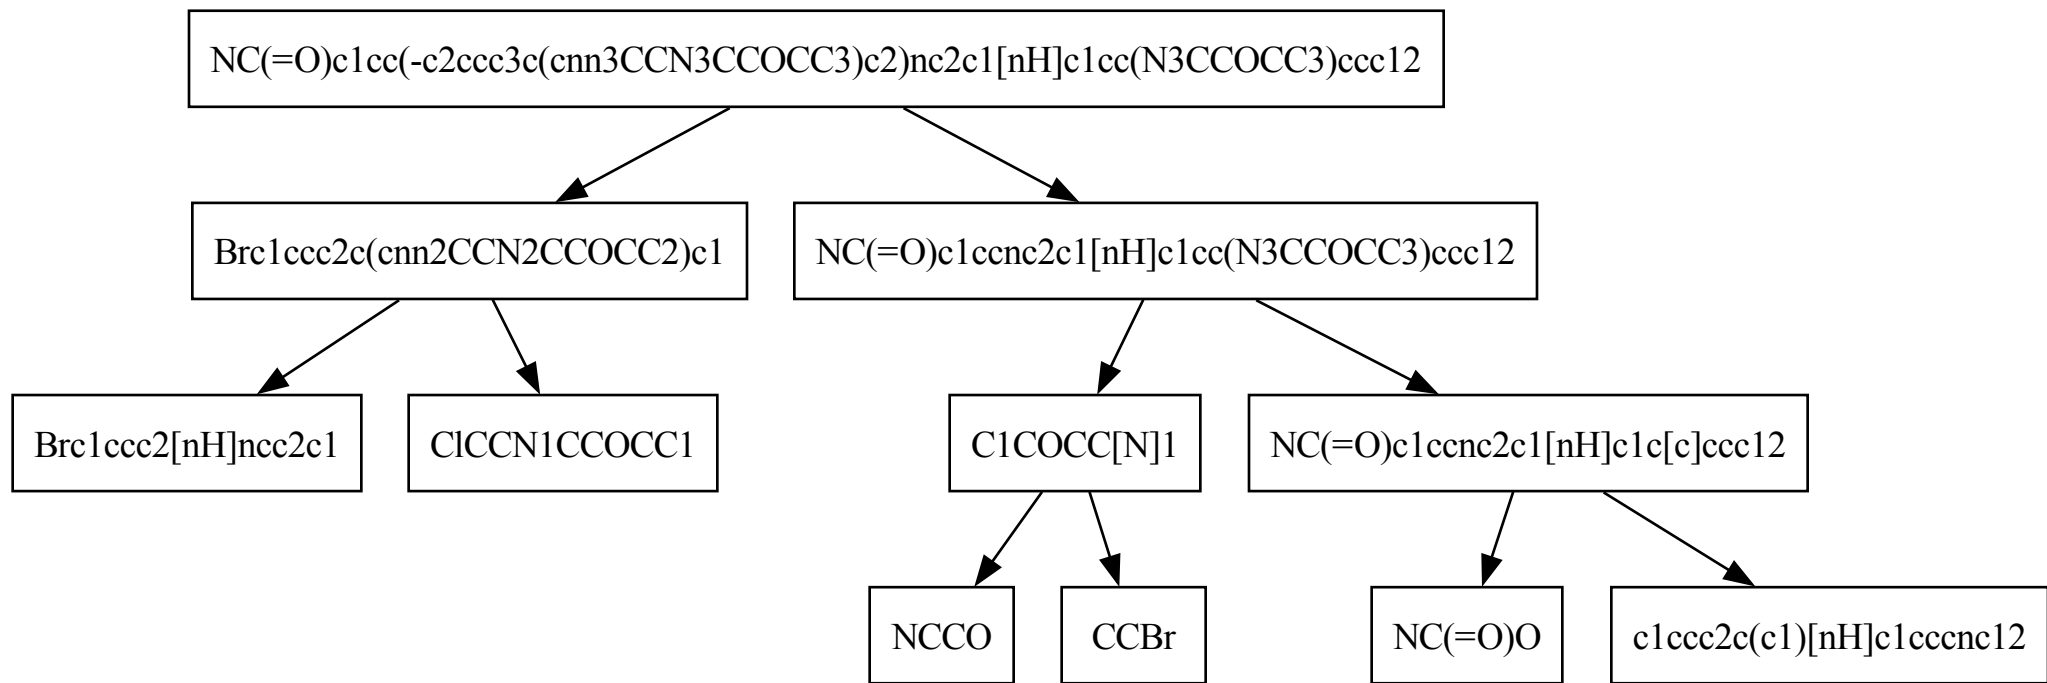

Supplement: supplementary_material [file mol_159_route_optimal.pdf › materials9084/retro190_solutions/mol_159_route_optimal.pdf]

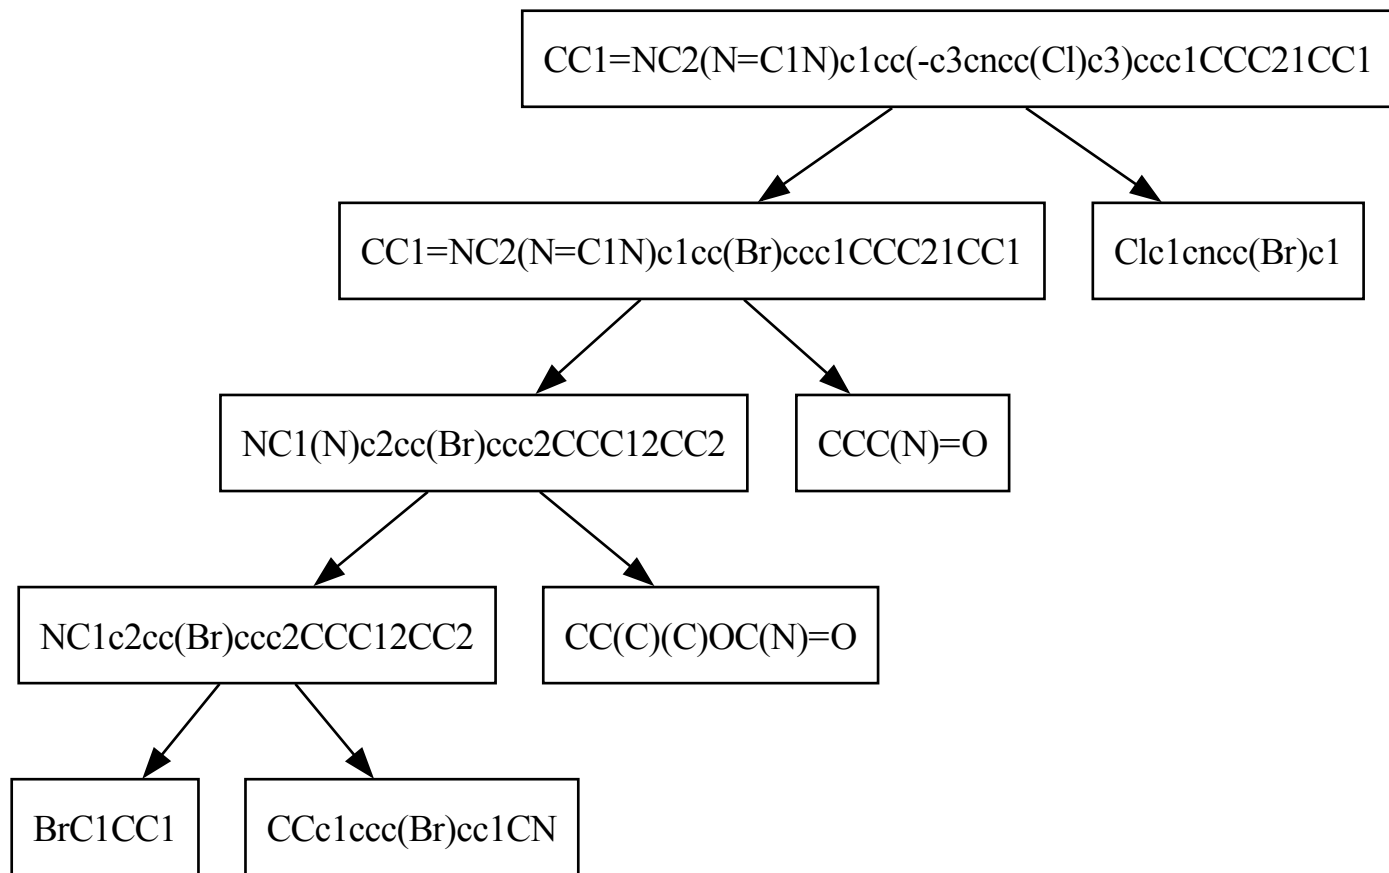

Supplement: supplementary_material [file mol_15_route_optimal.pdf › materials9084/retro190_solutions/mol_15_route_optimal.pdf]

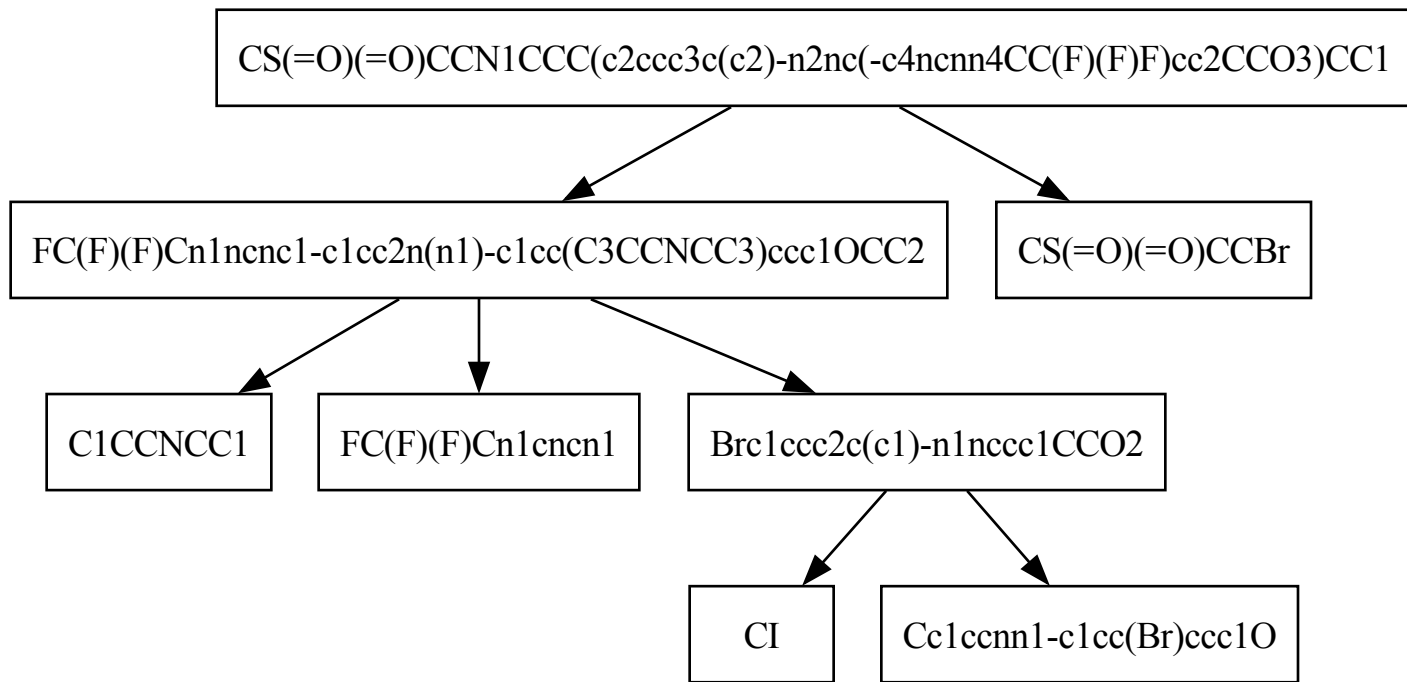

Supplement: supplementary_material [file mol_160_route_optimal.pdf › materials9084/retro190_solutions/mol_160_route_optimal.pdf]

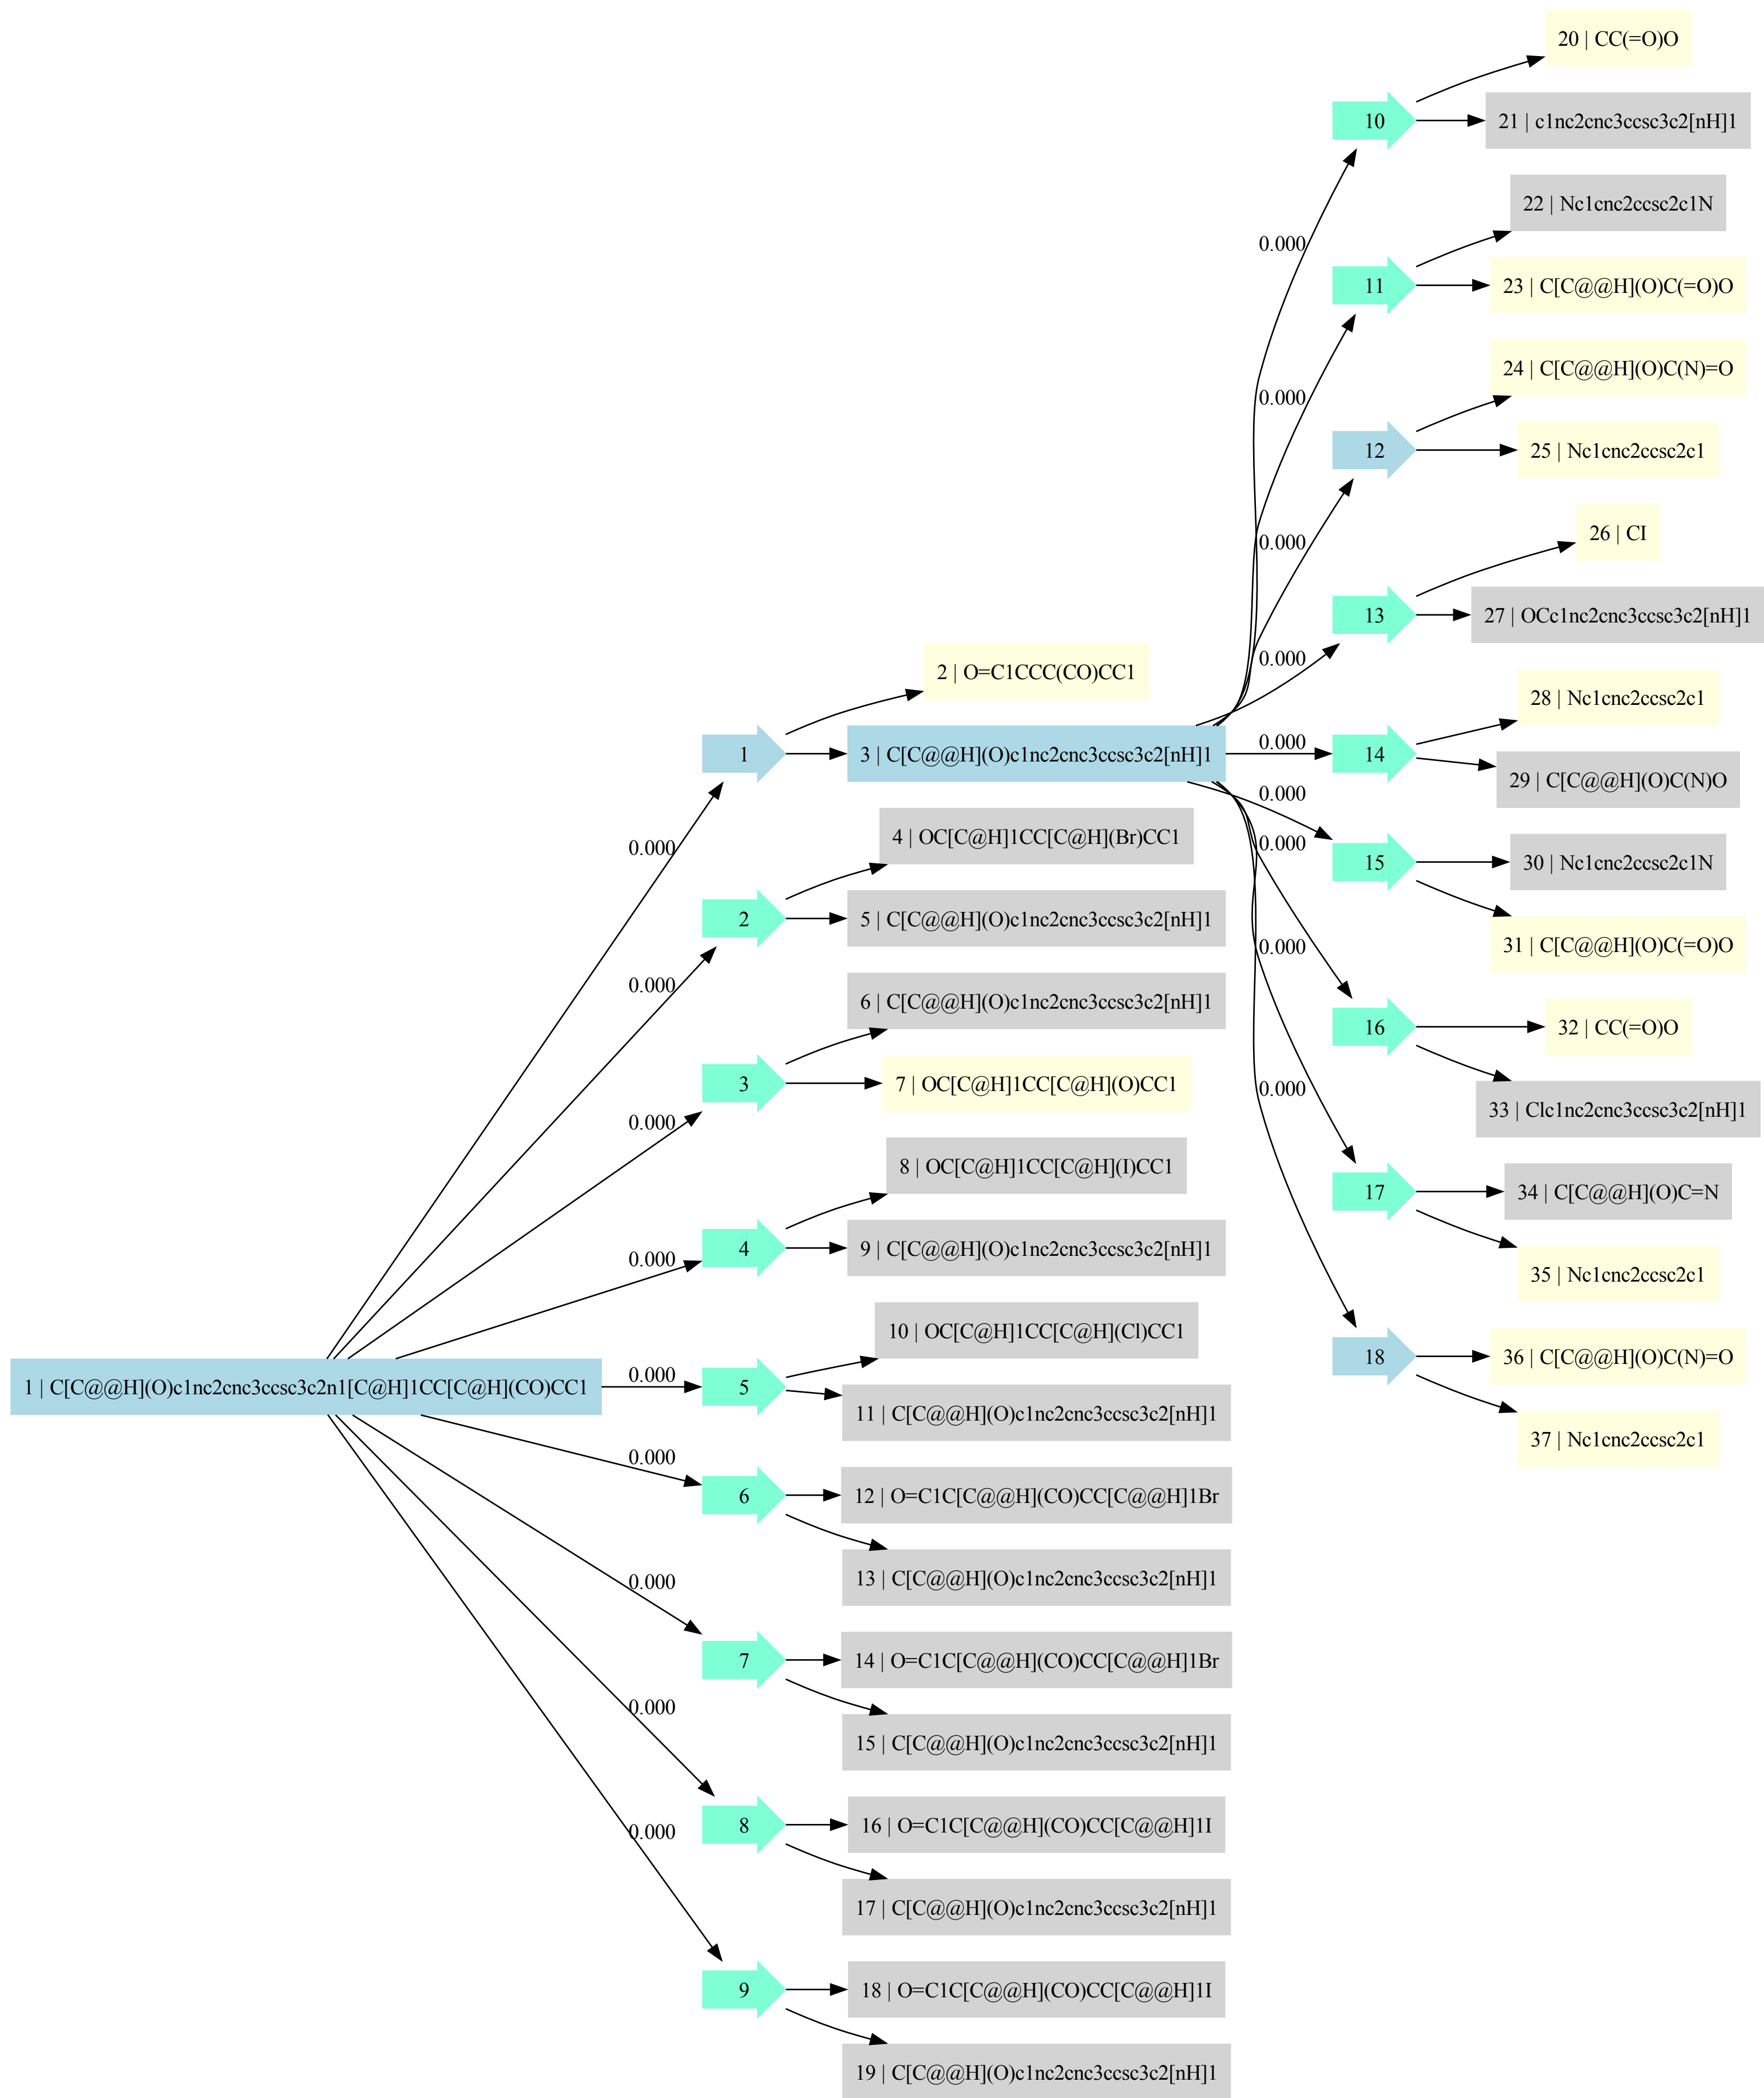

Supplement: supplementary_material [file mol_161_search_tree.pdf › materials9084/retro190_solutions/mol_161_search_tree.pdf]

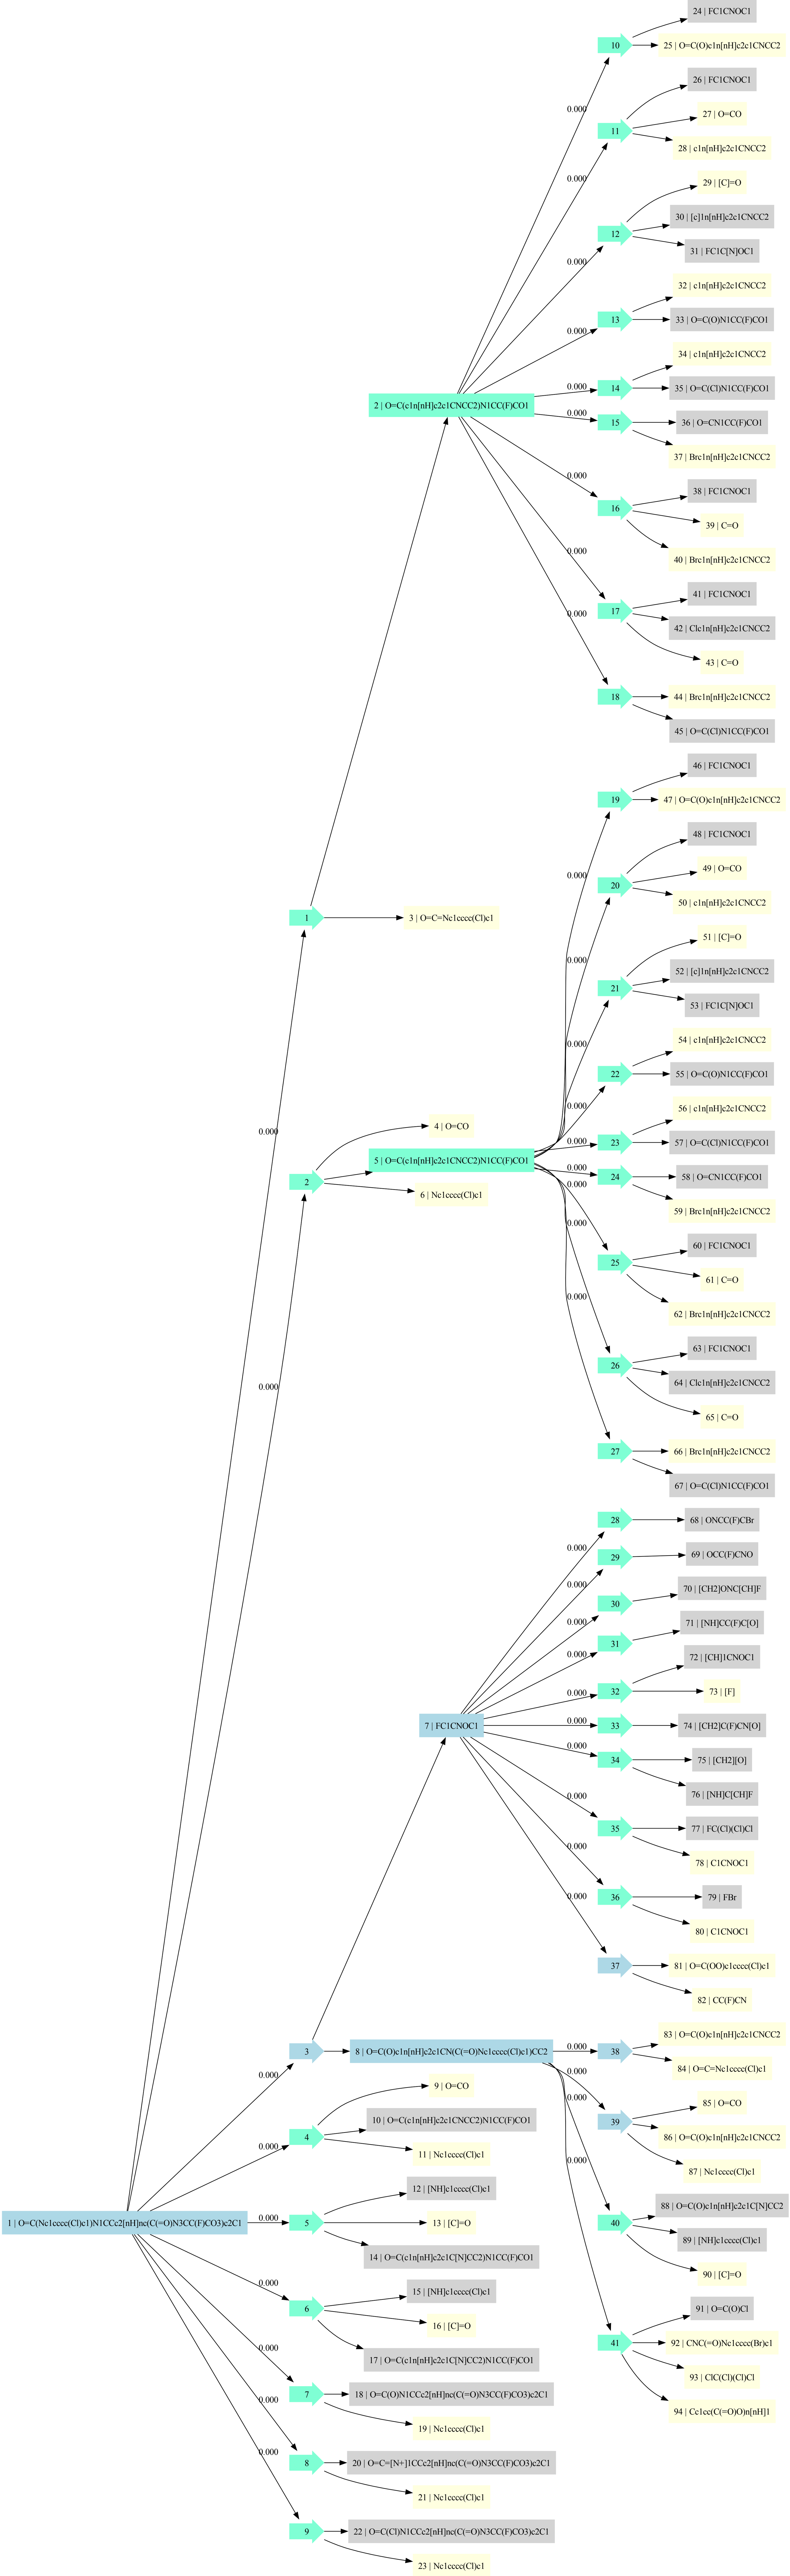

Supplement: supplementary_material [file mol_162_search_tree.pdf › materials9084/retro190_solutions/mol_162_search_tree.pdf]

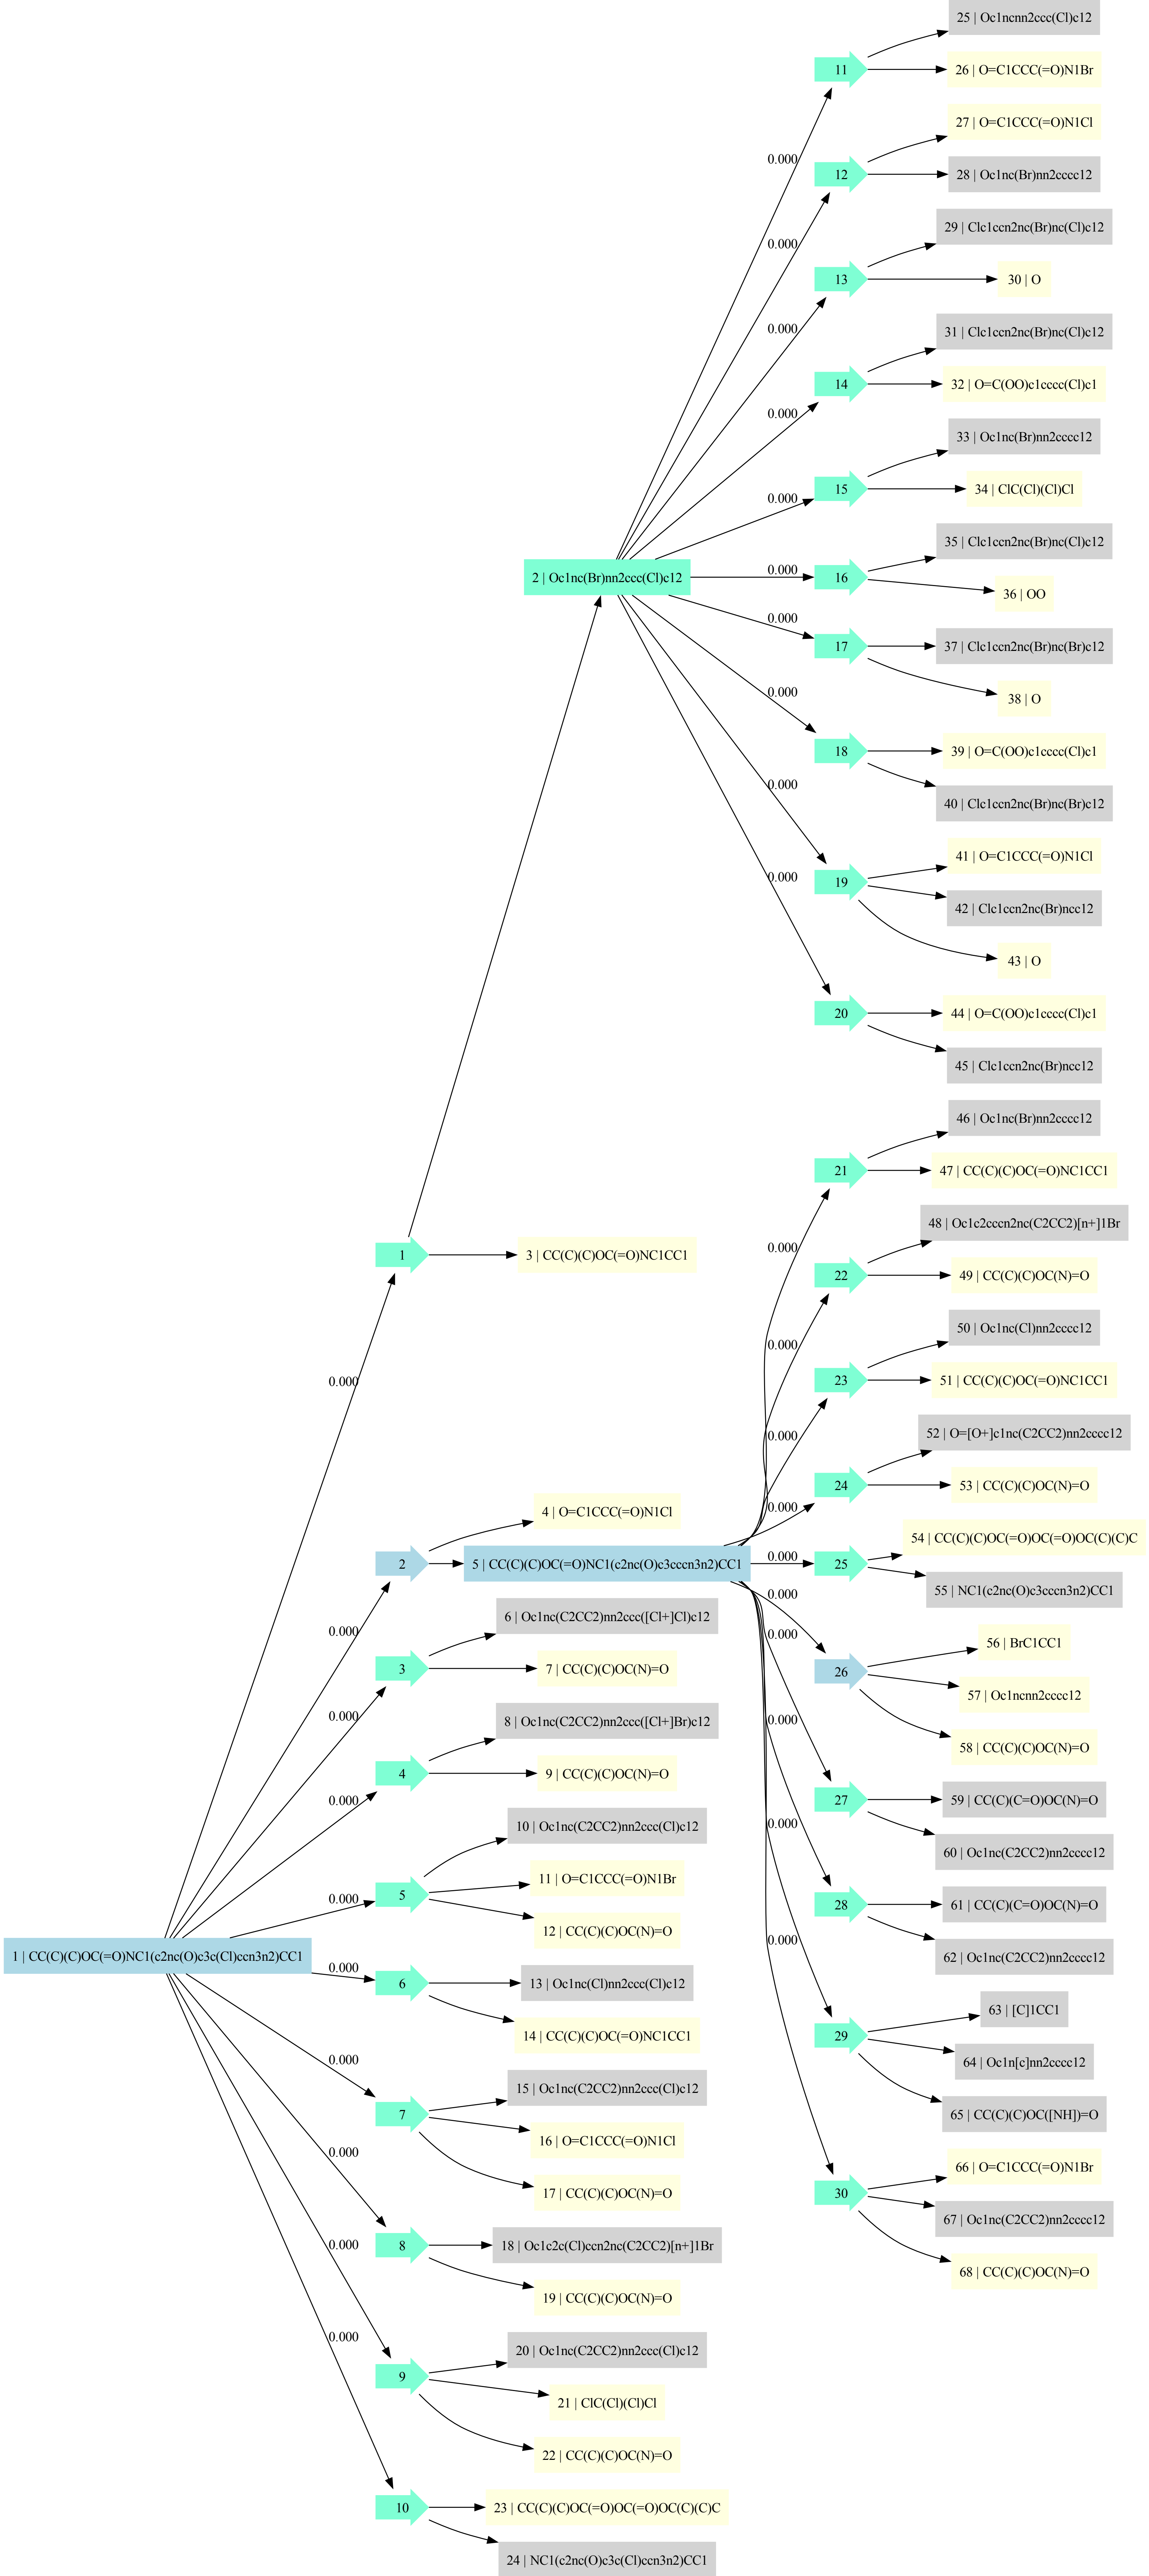

Supplement: supplementary_material [file mol_163_search_tree.pdf › materials9084/retro190_solutions/mol_163_search_tree.pdf]

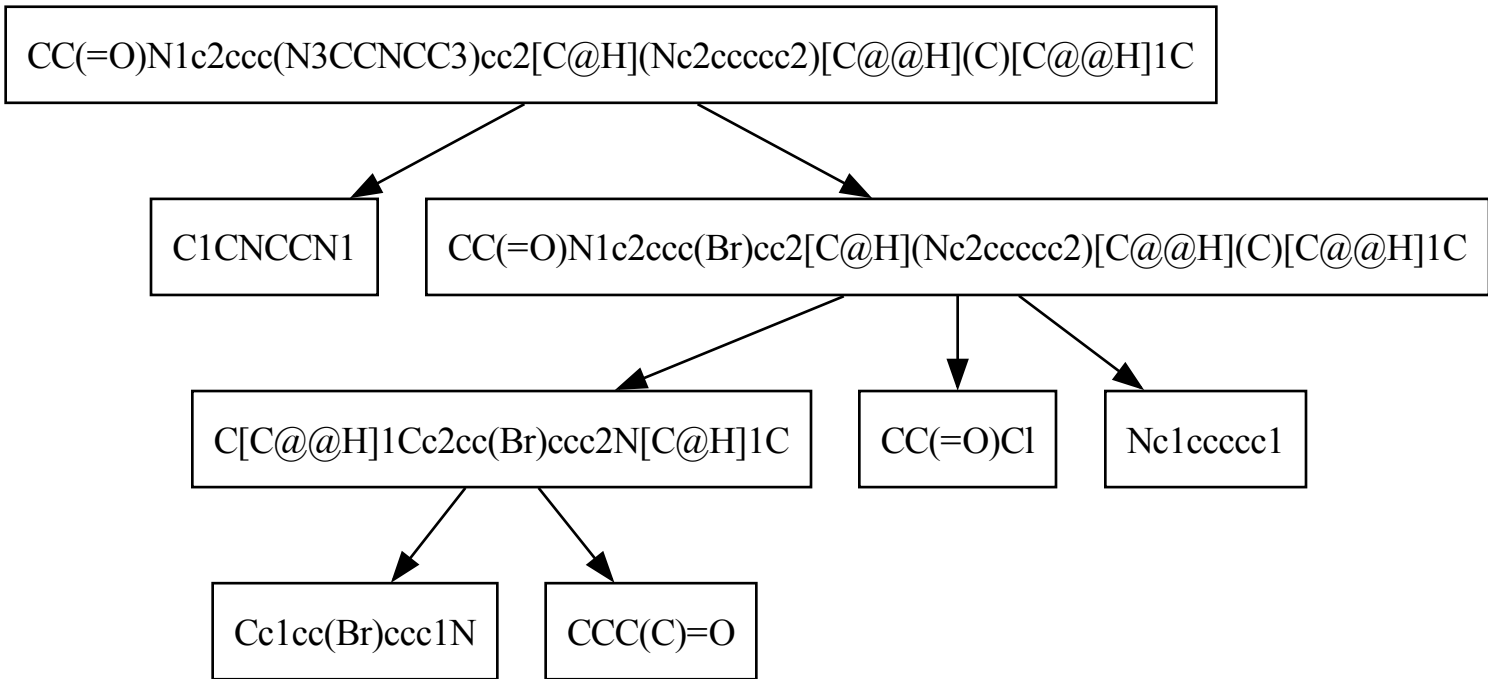

Supplement: supplementary_material [file mol_164_route_optimal.pdf › materials9084/retro190_solutions/mol_164_route_optimal.pdf]

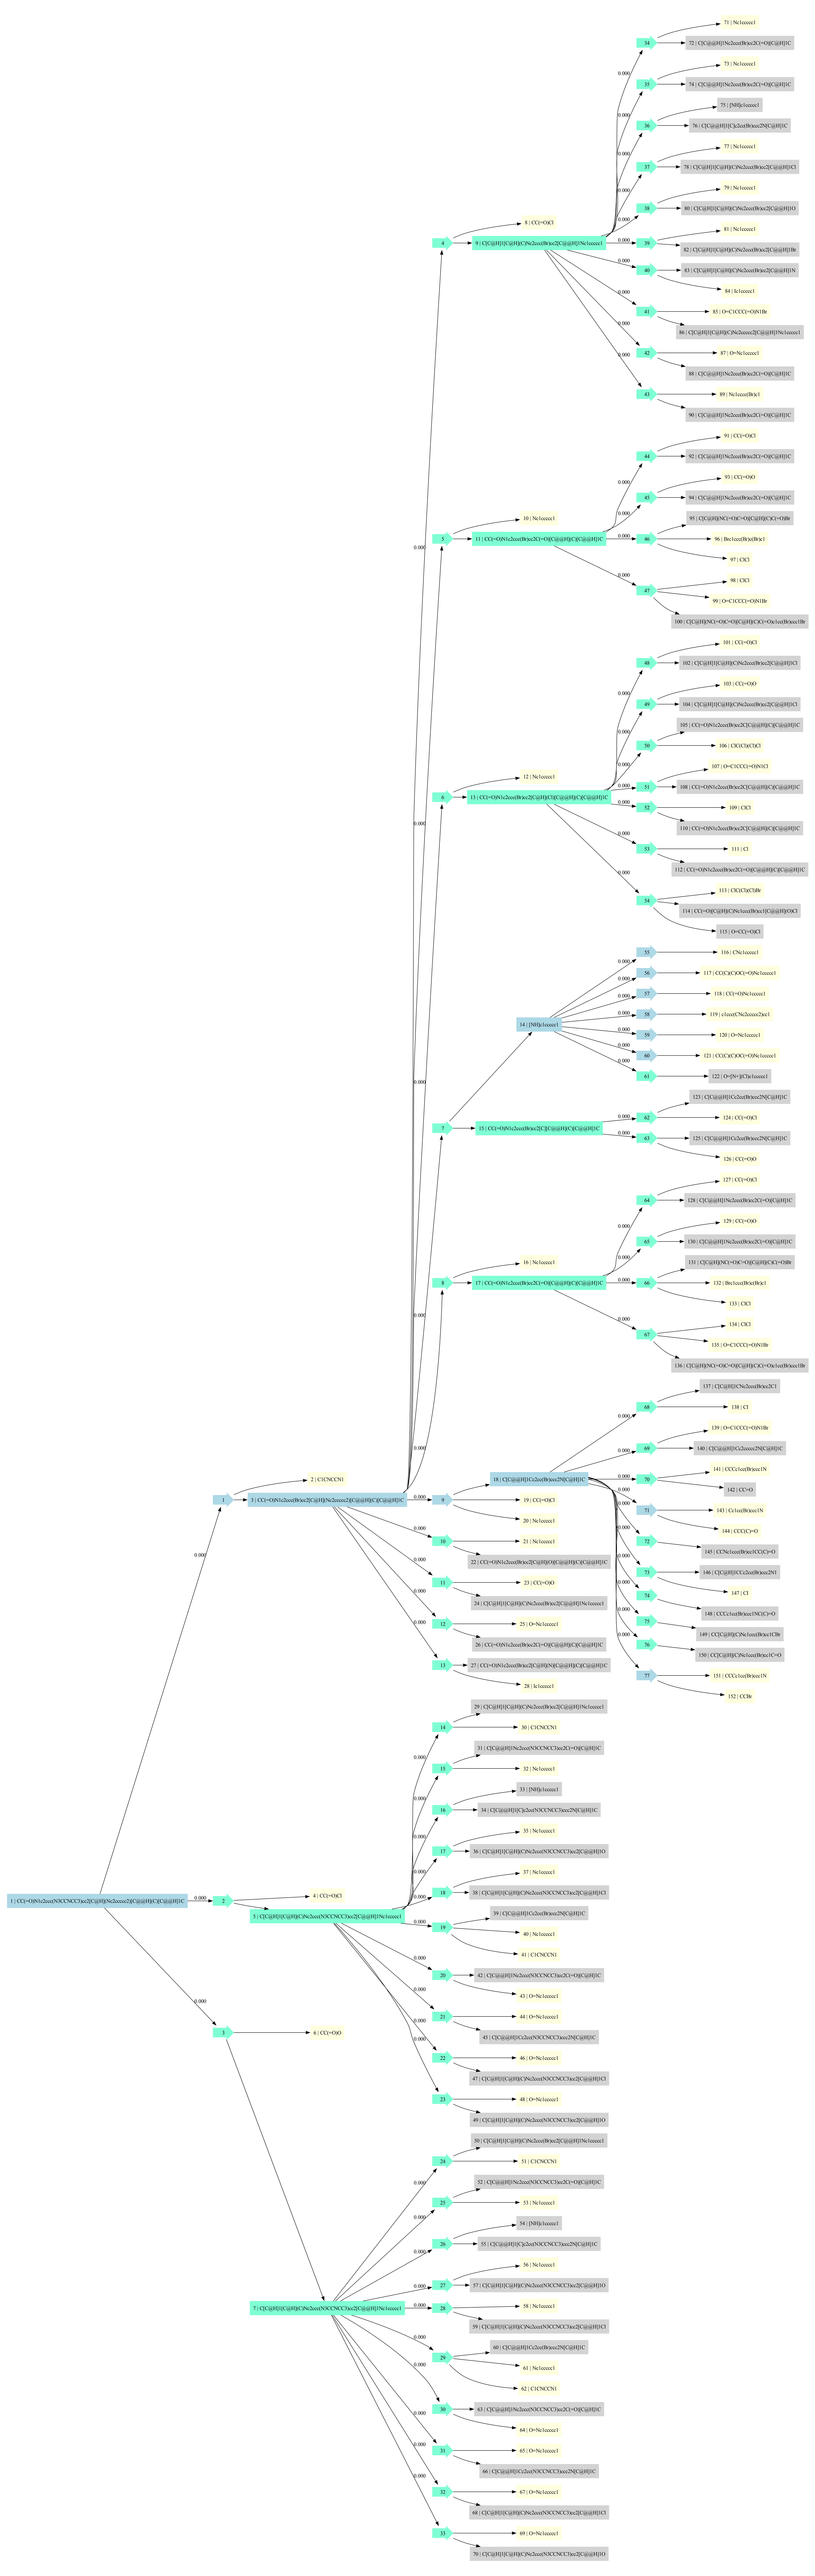

Supplement: supplementary_material [file mol_164_search_tree.pdf › materials9084/retro190_solutions/mol_164_search_tree.pdf]

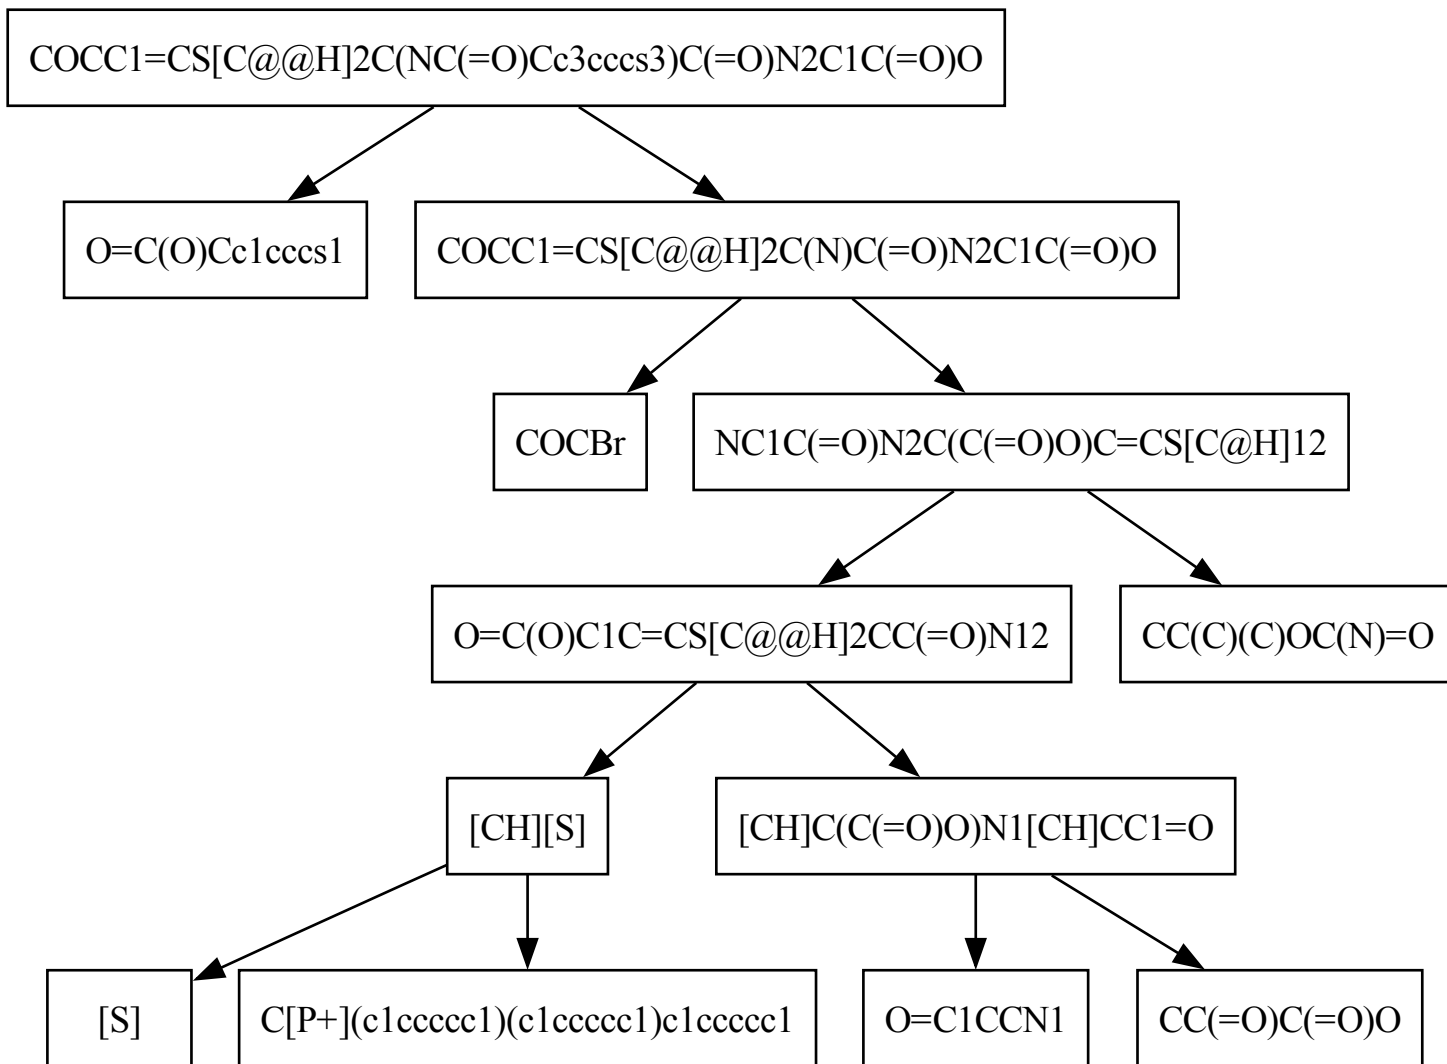

Supplement: supplementary_material [file mol_165_route_optimal.pdf › materials9084/retro190_solutions/mol_165_route_optimal.pdf]

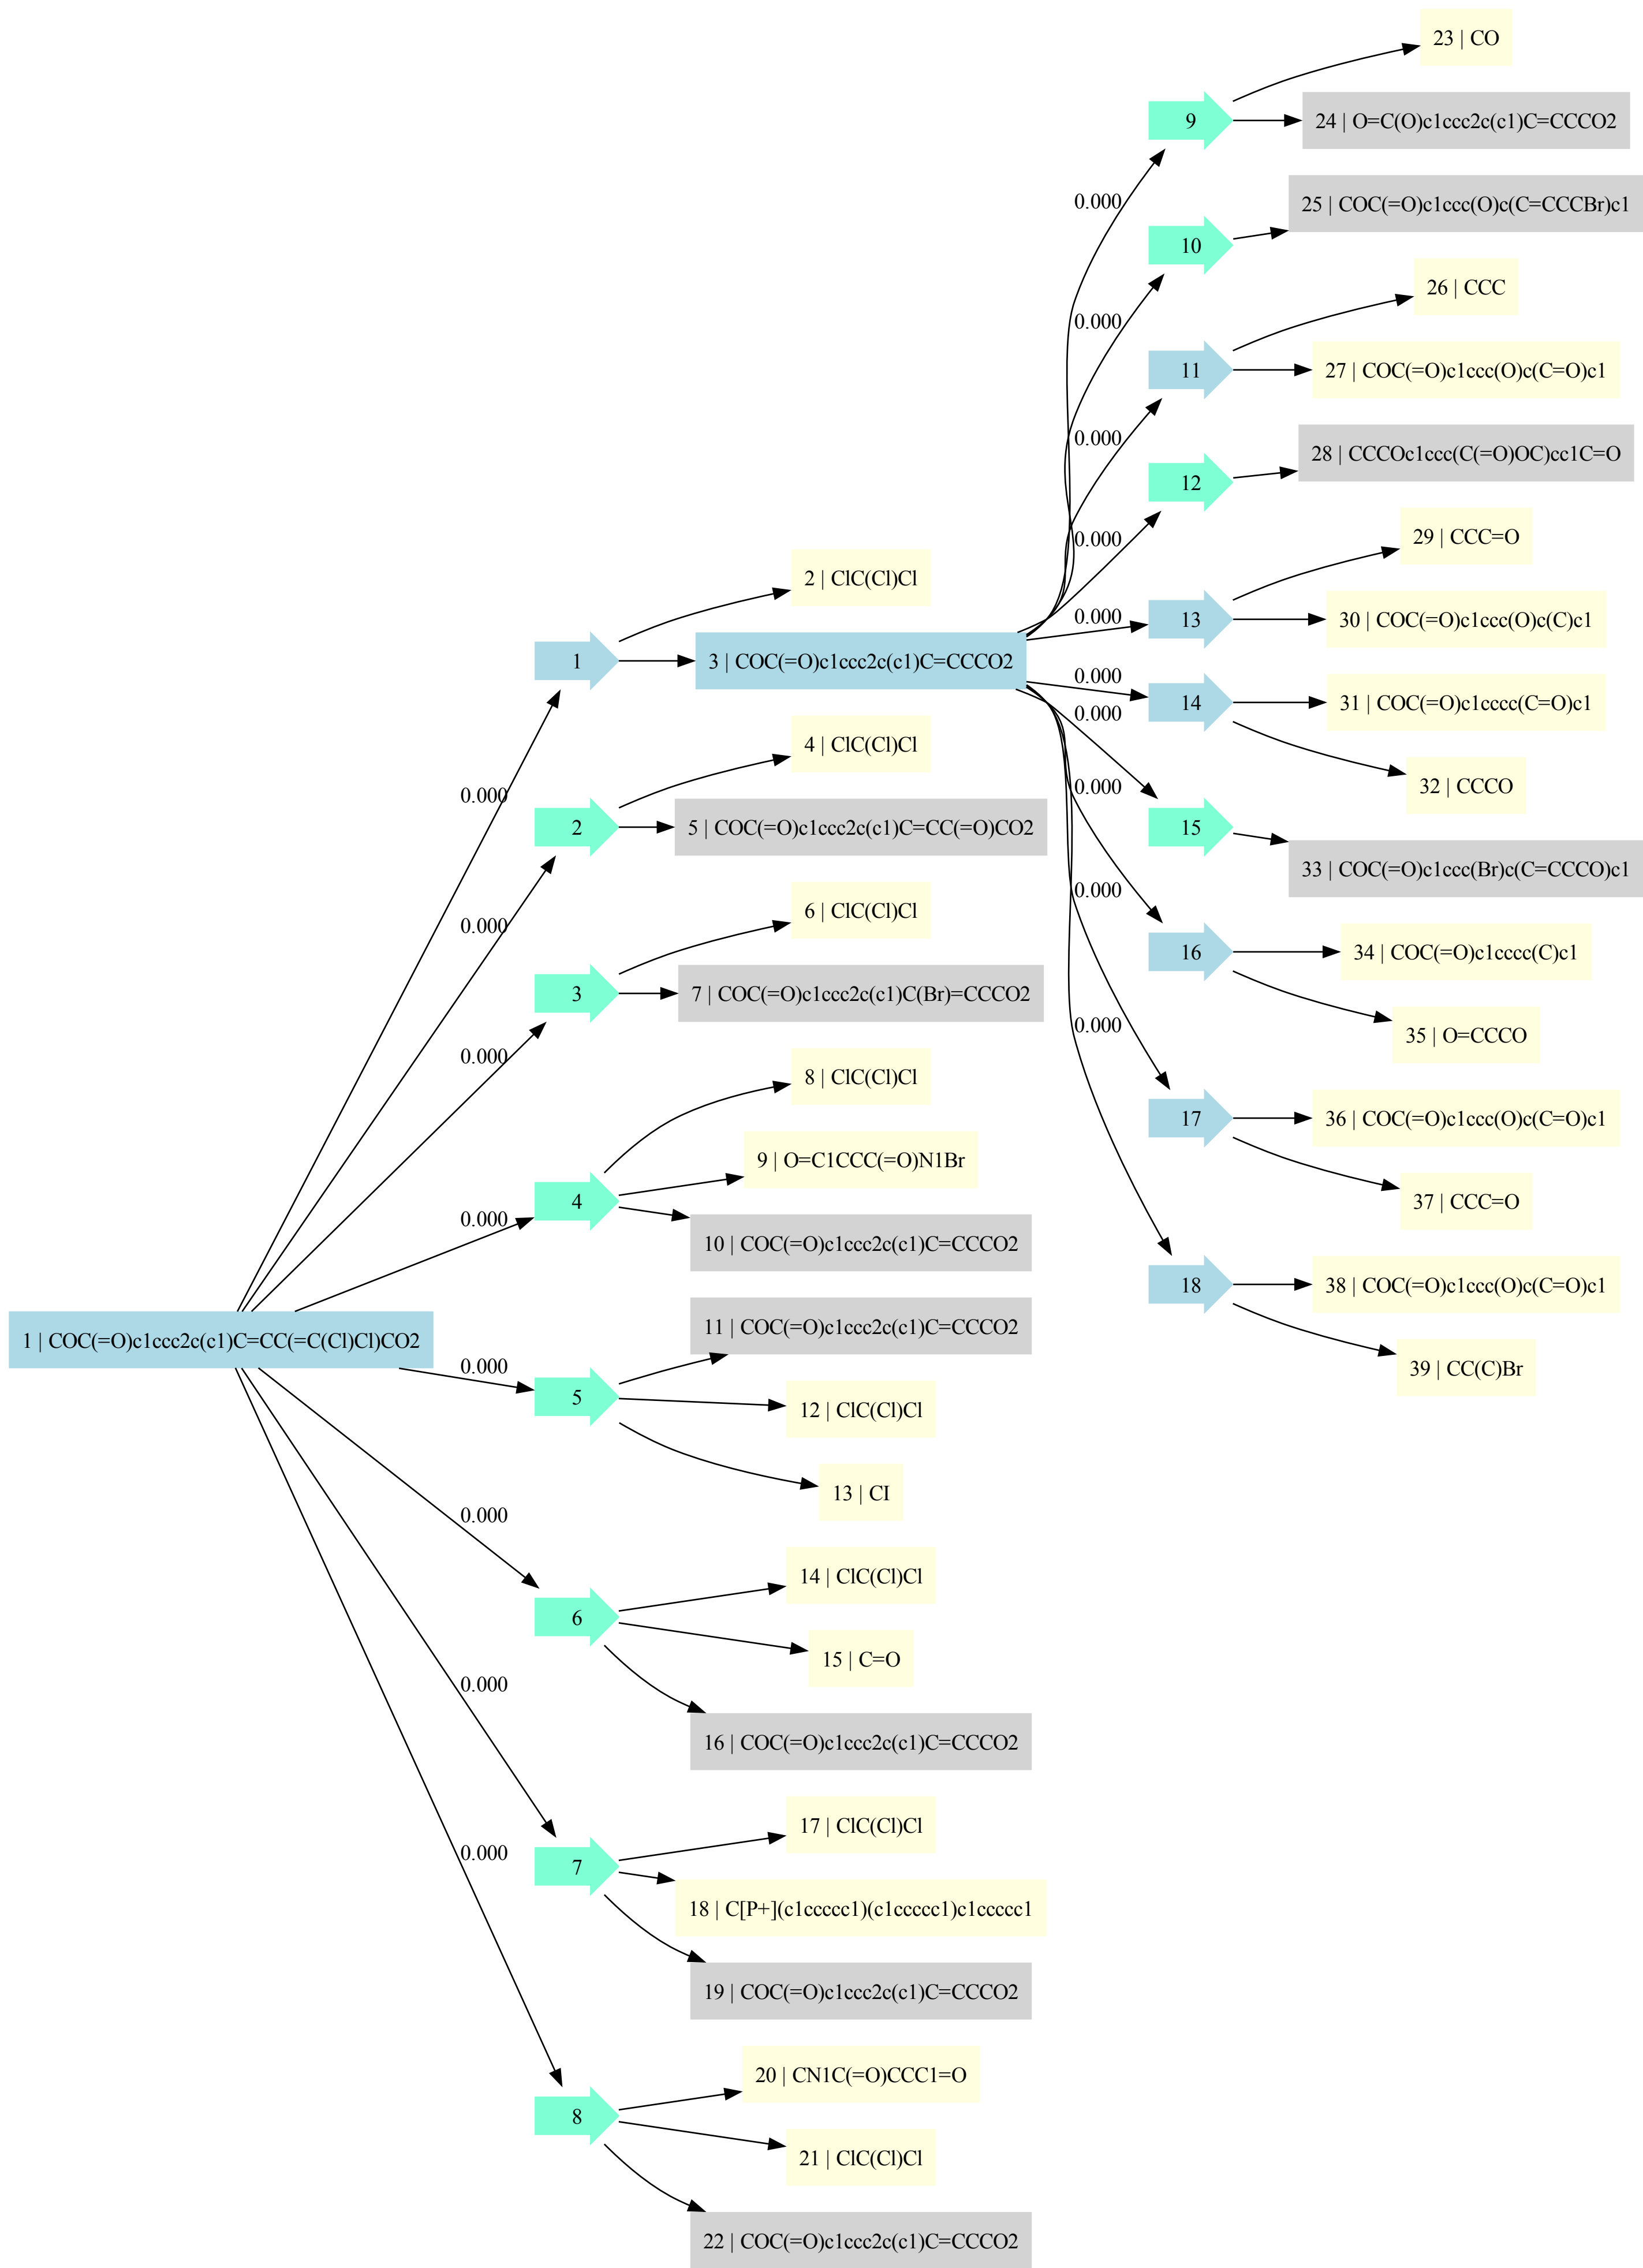

Supplement: supplementary_material [file mol_166_search_tree.pdf › materials9084/retro190_solutions/mol_166_search_tree.pdf]

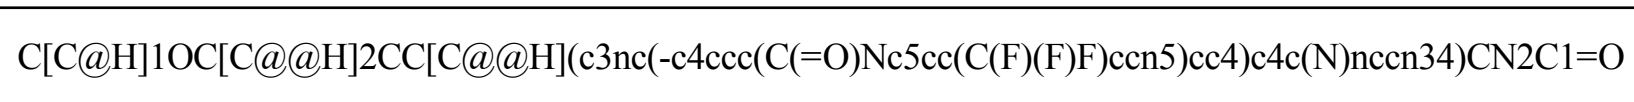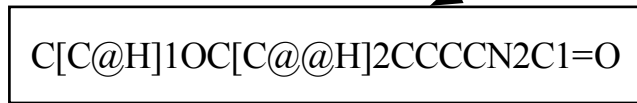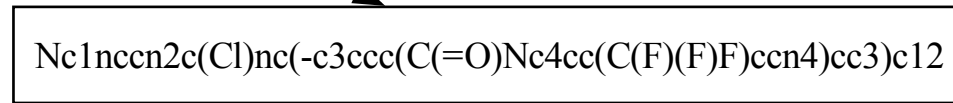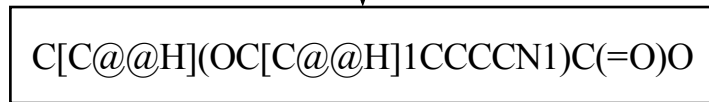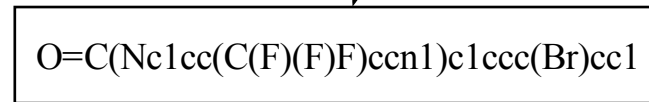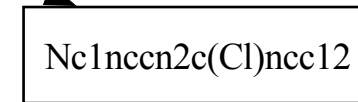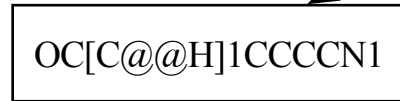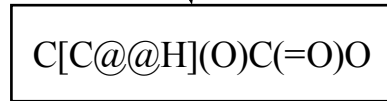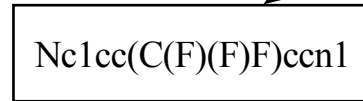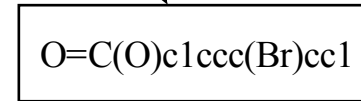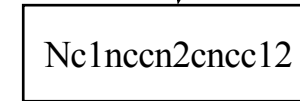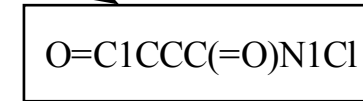

Supplement: supplementary_material [file mol_167_route_optimal.pdf › materials9084/retro190_solutions/mol_167_route_optimal.pdf]

C#CC1(O)C(C)=CC2(CC1(C)C(F)(F)F)OC(C)C(C)O2

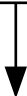

C#CC(=O)C(C)=CC1(CC(C)C(F)(F)F)OC(C)C(C)O1

C#CC(=O)CC

CC(=O)C(F)(F)F

CC1OC(C)(C=O)OC1C

CC(=O)C=O

CC(O)C(C)O

Supplement: supplementary_material [file mol_168_route_optimal.pdf › materials9084/retro190_solutions/mol_168_route_optimal.pdf]

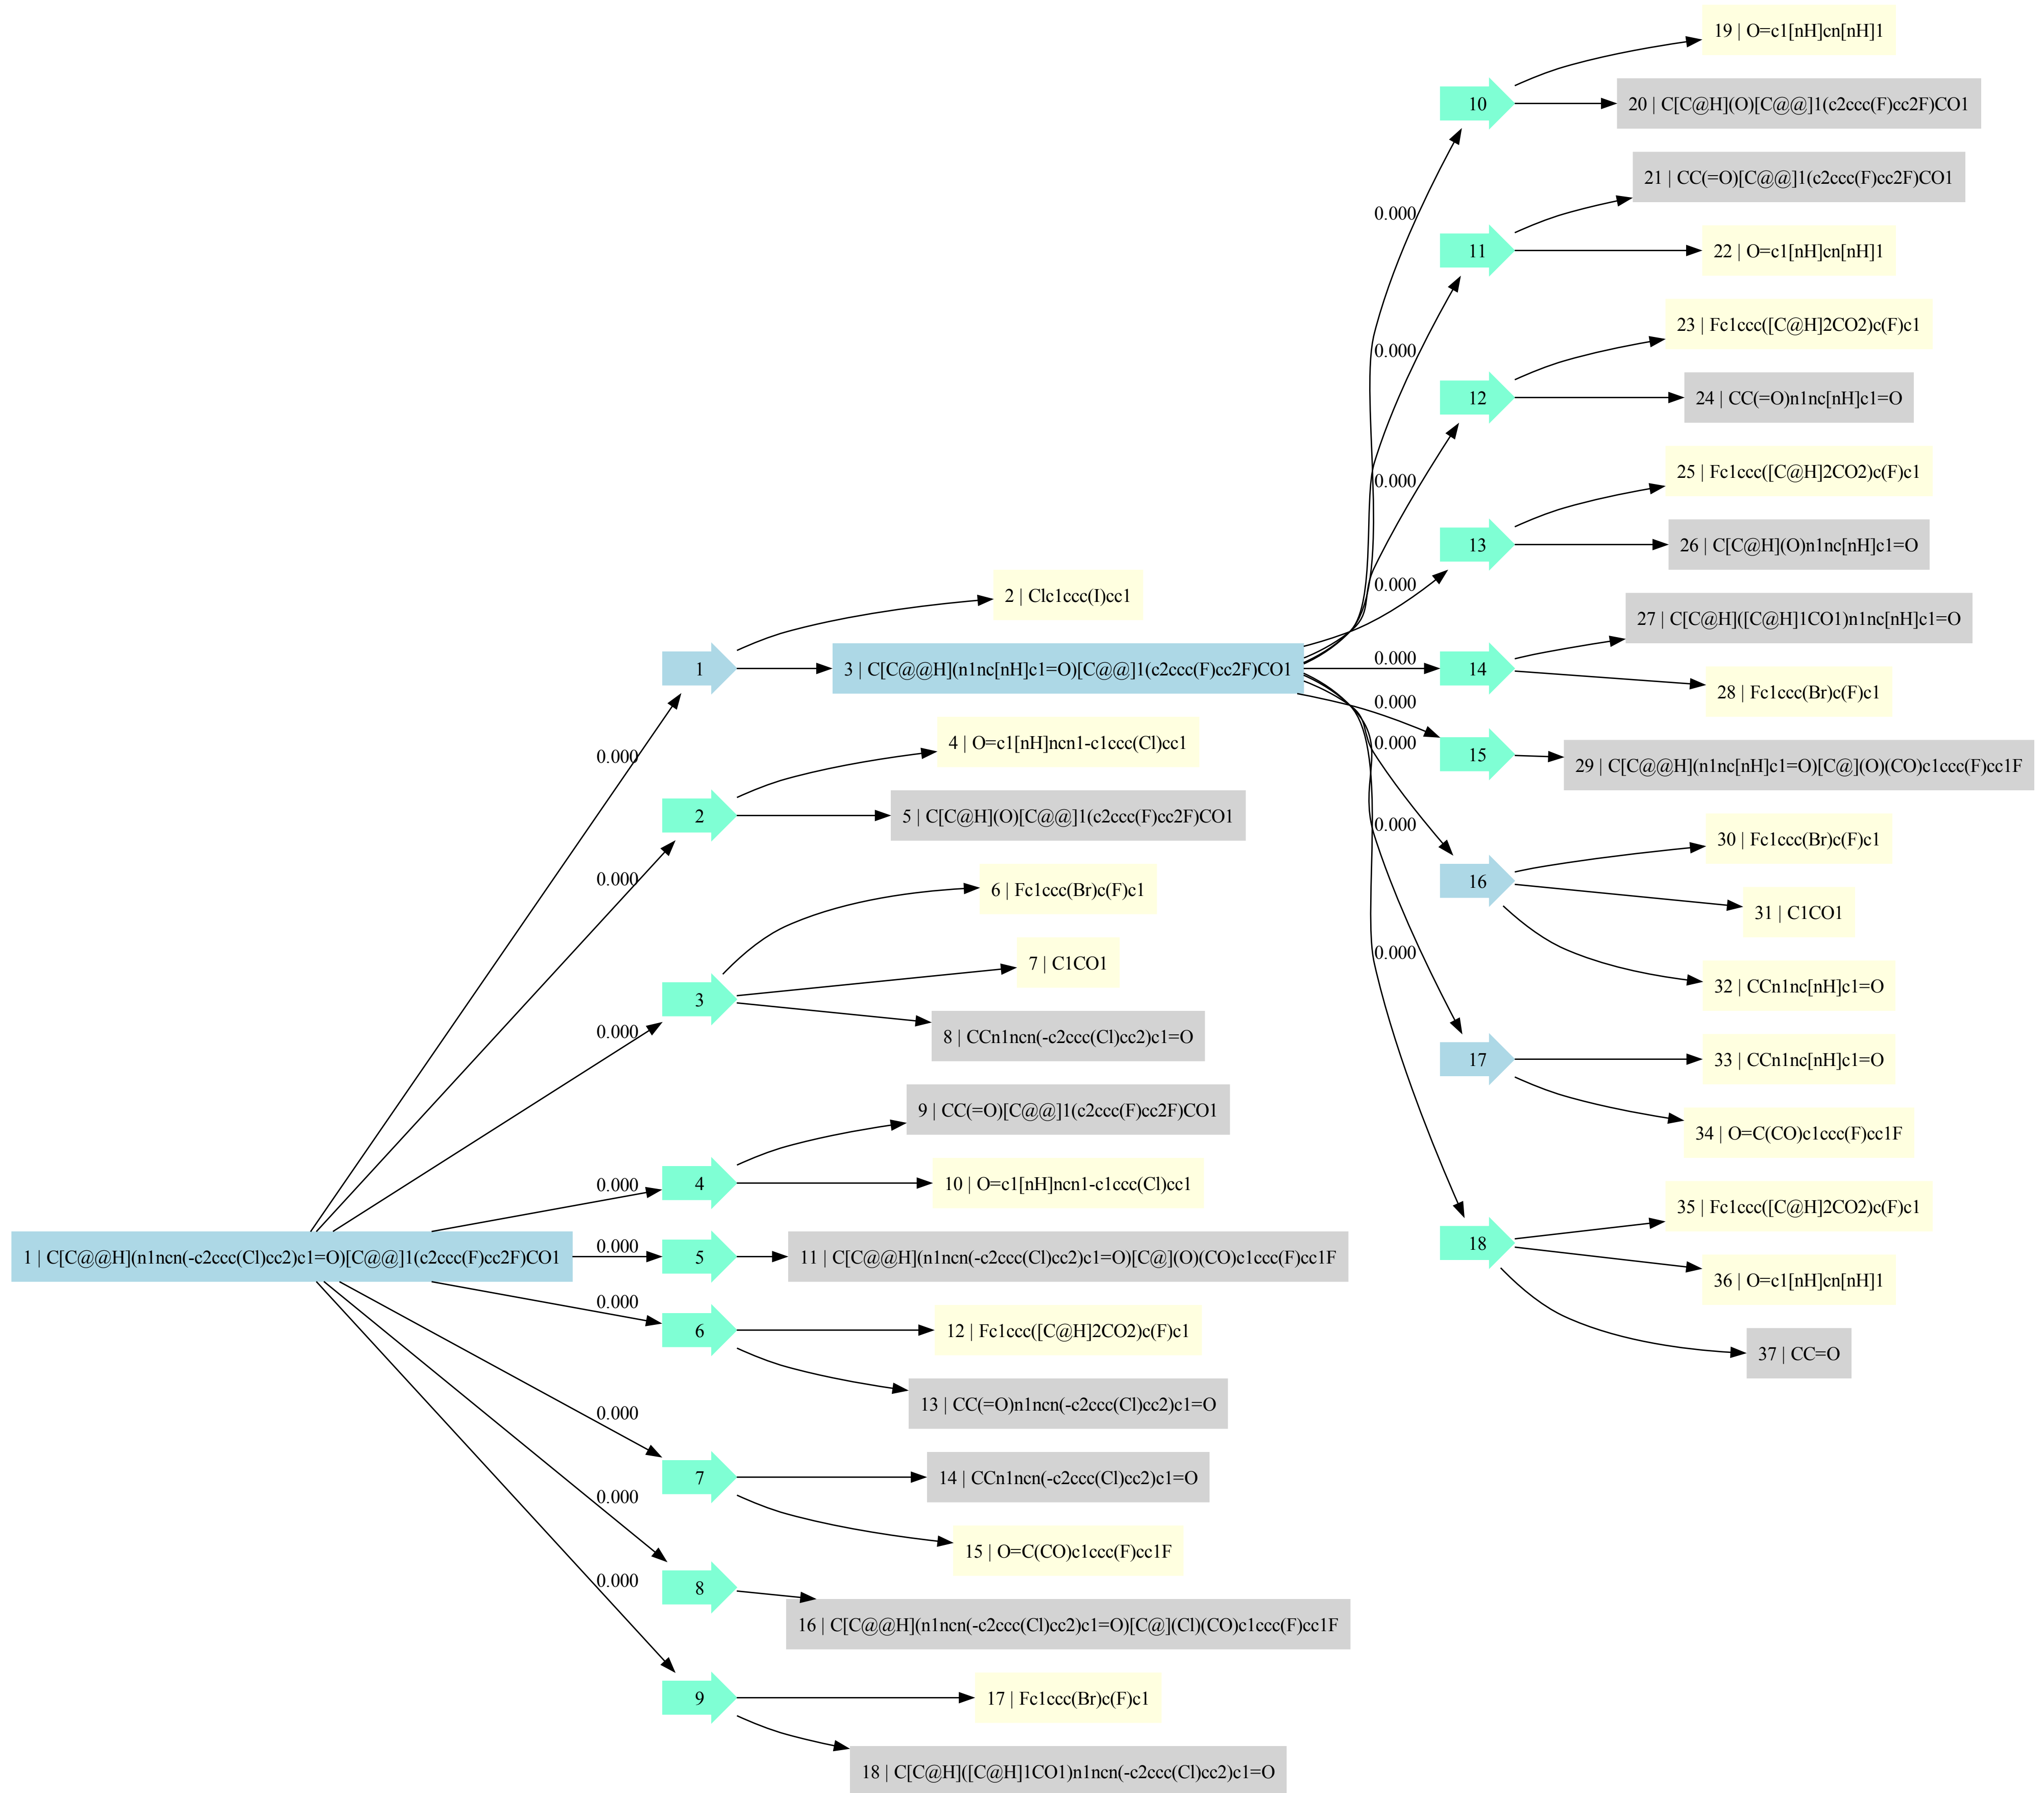

Supplement: supplementary_material [file mol_169_search_tree.pdf › materials9084/retro190_solutions/mol_169_search_tree.pdf]

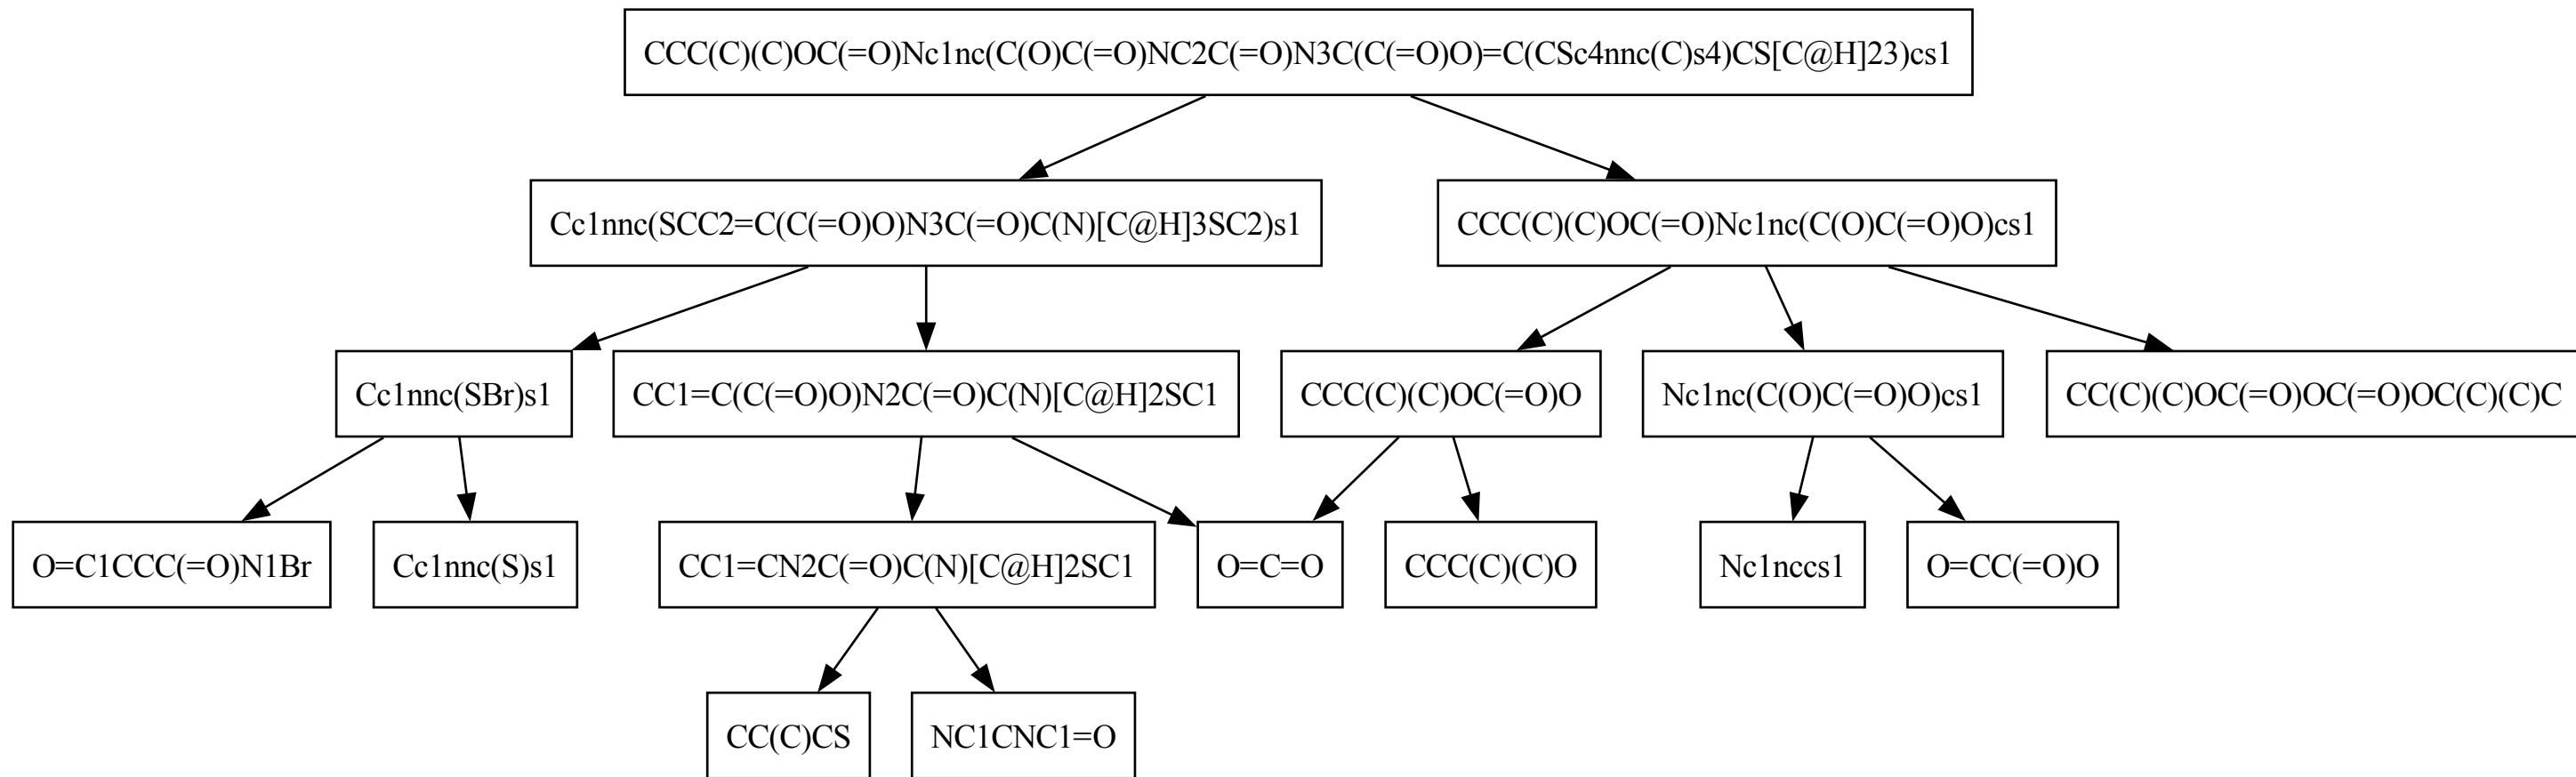

Supplement: supplementary_material [file mol_170_route_optimal.pdf › materials9084/retro190_solutions/mol_170_route_optimal.pdf]

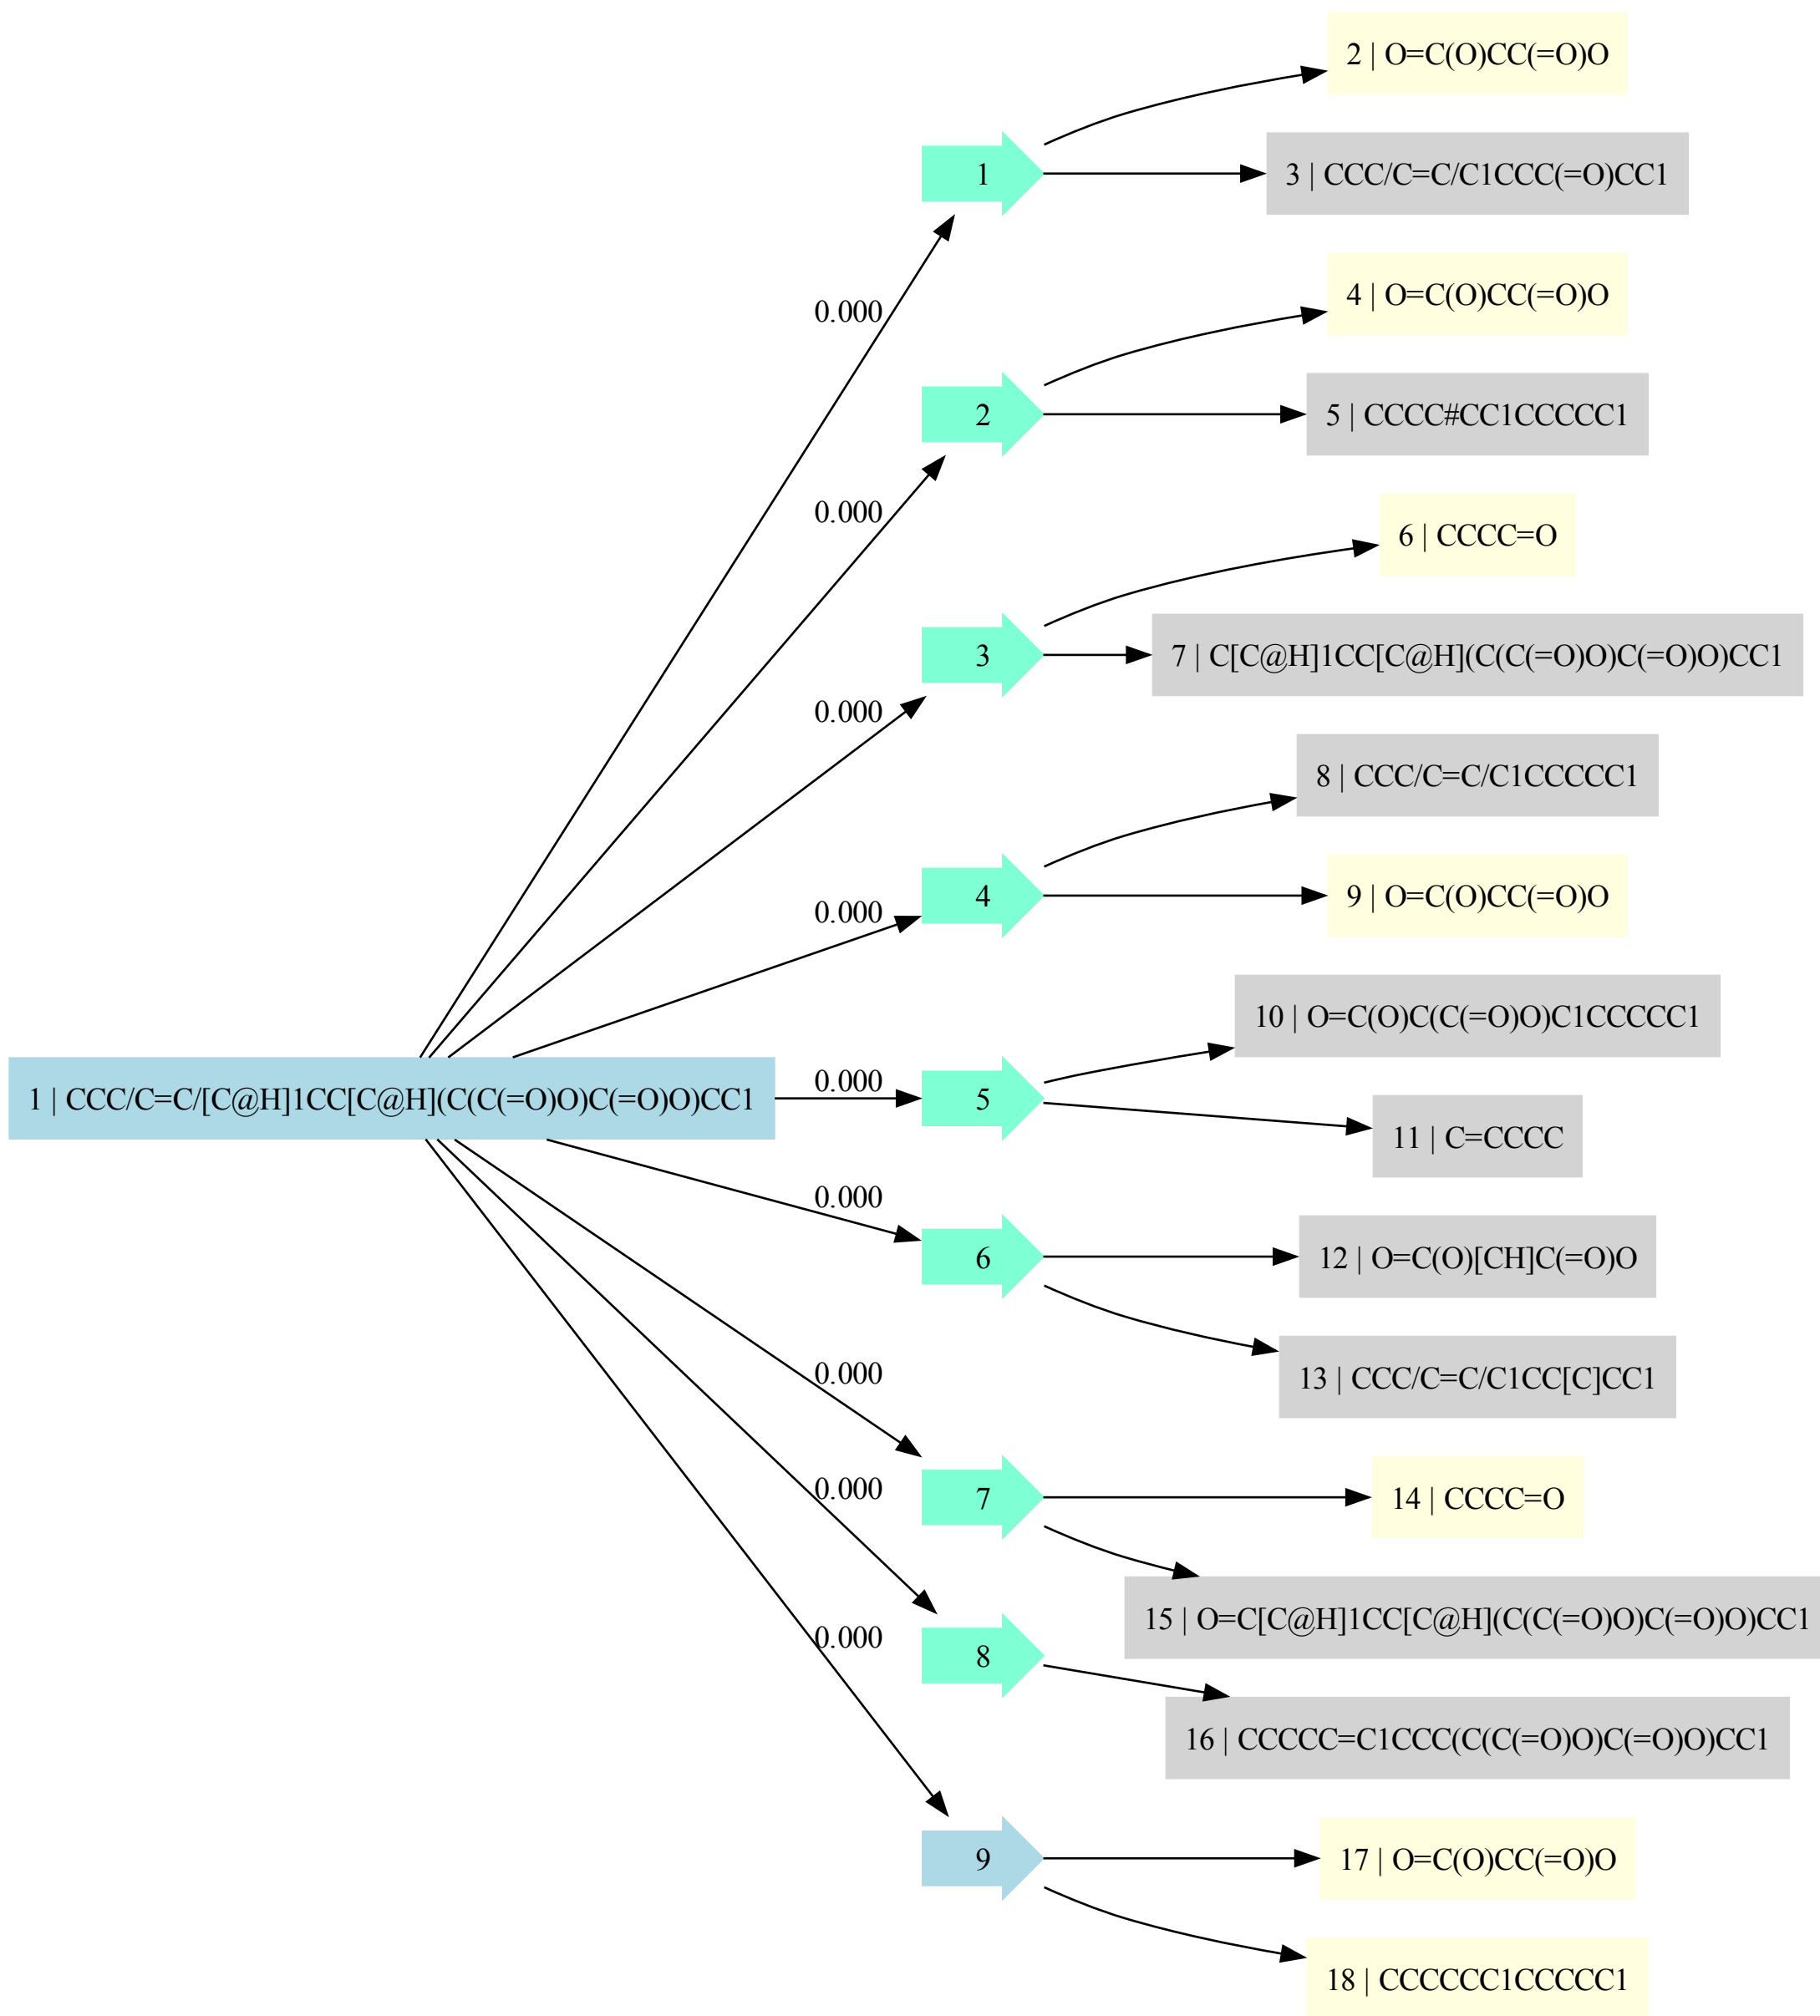

Supplement: supplementary_material [file mol_172_search_tree.pdf › materials9084/retro190_solutions/mol_172_search_tree.pdf]

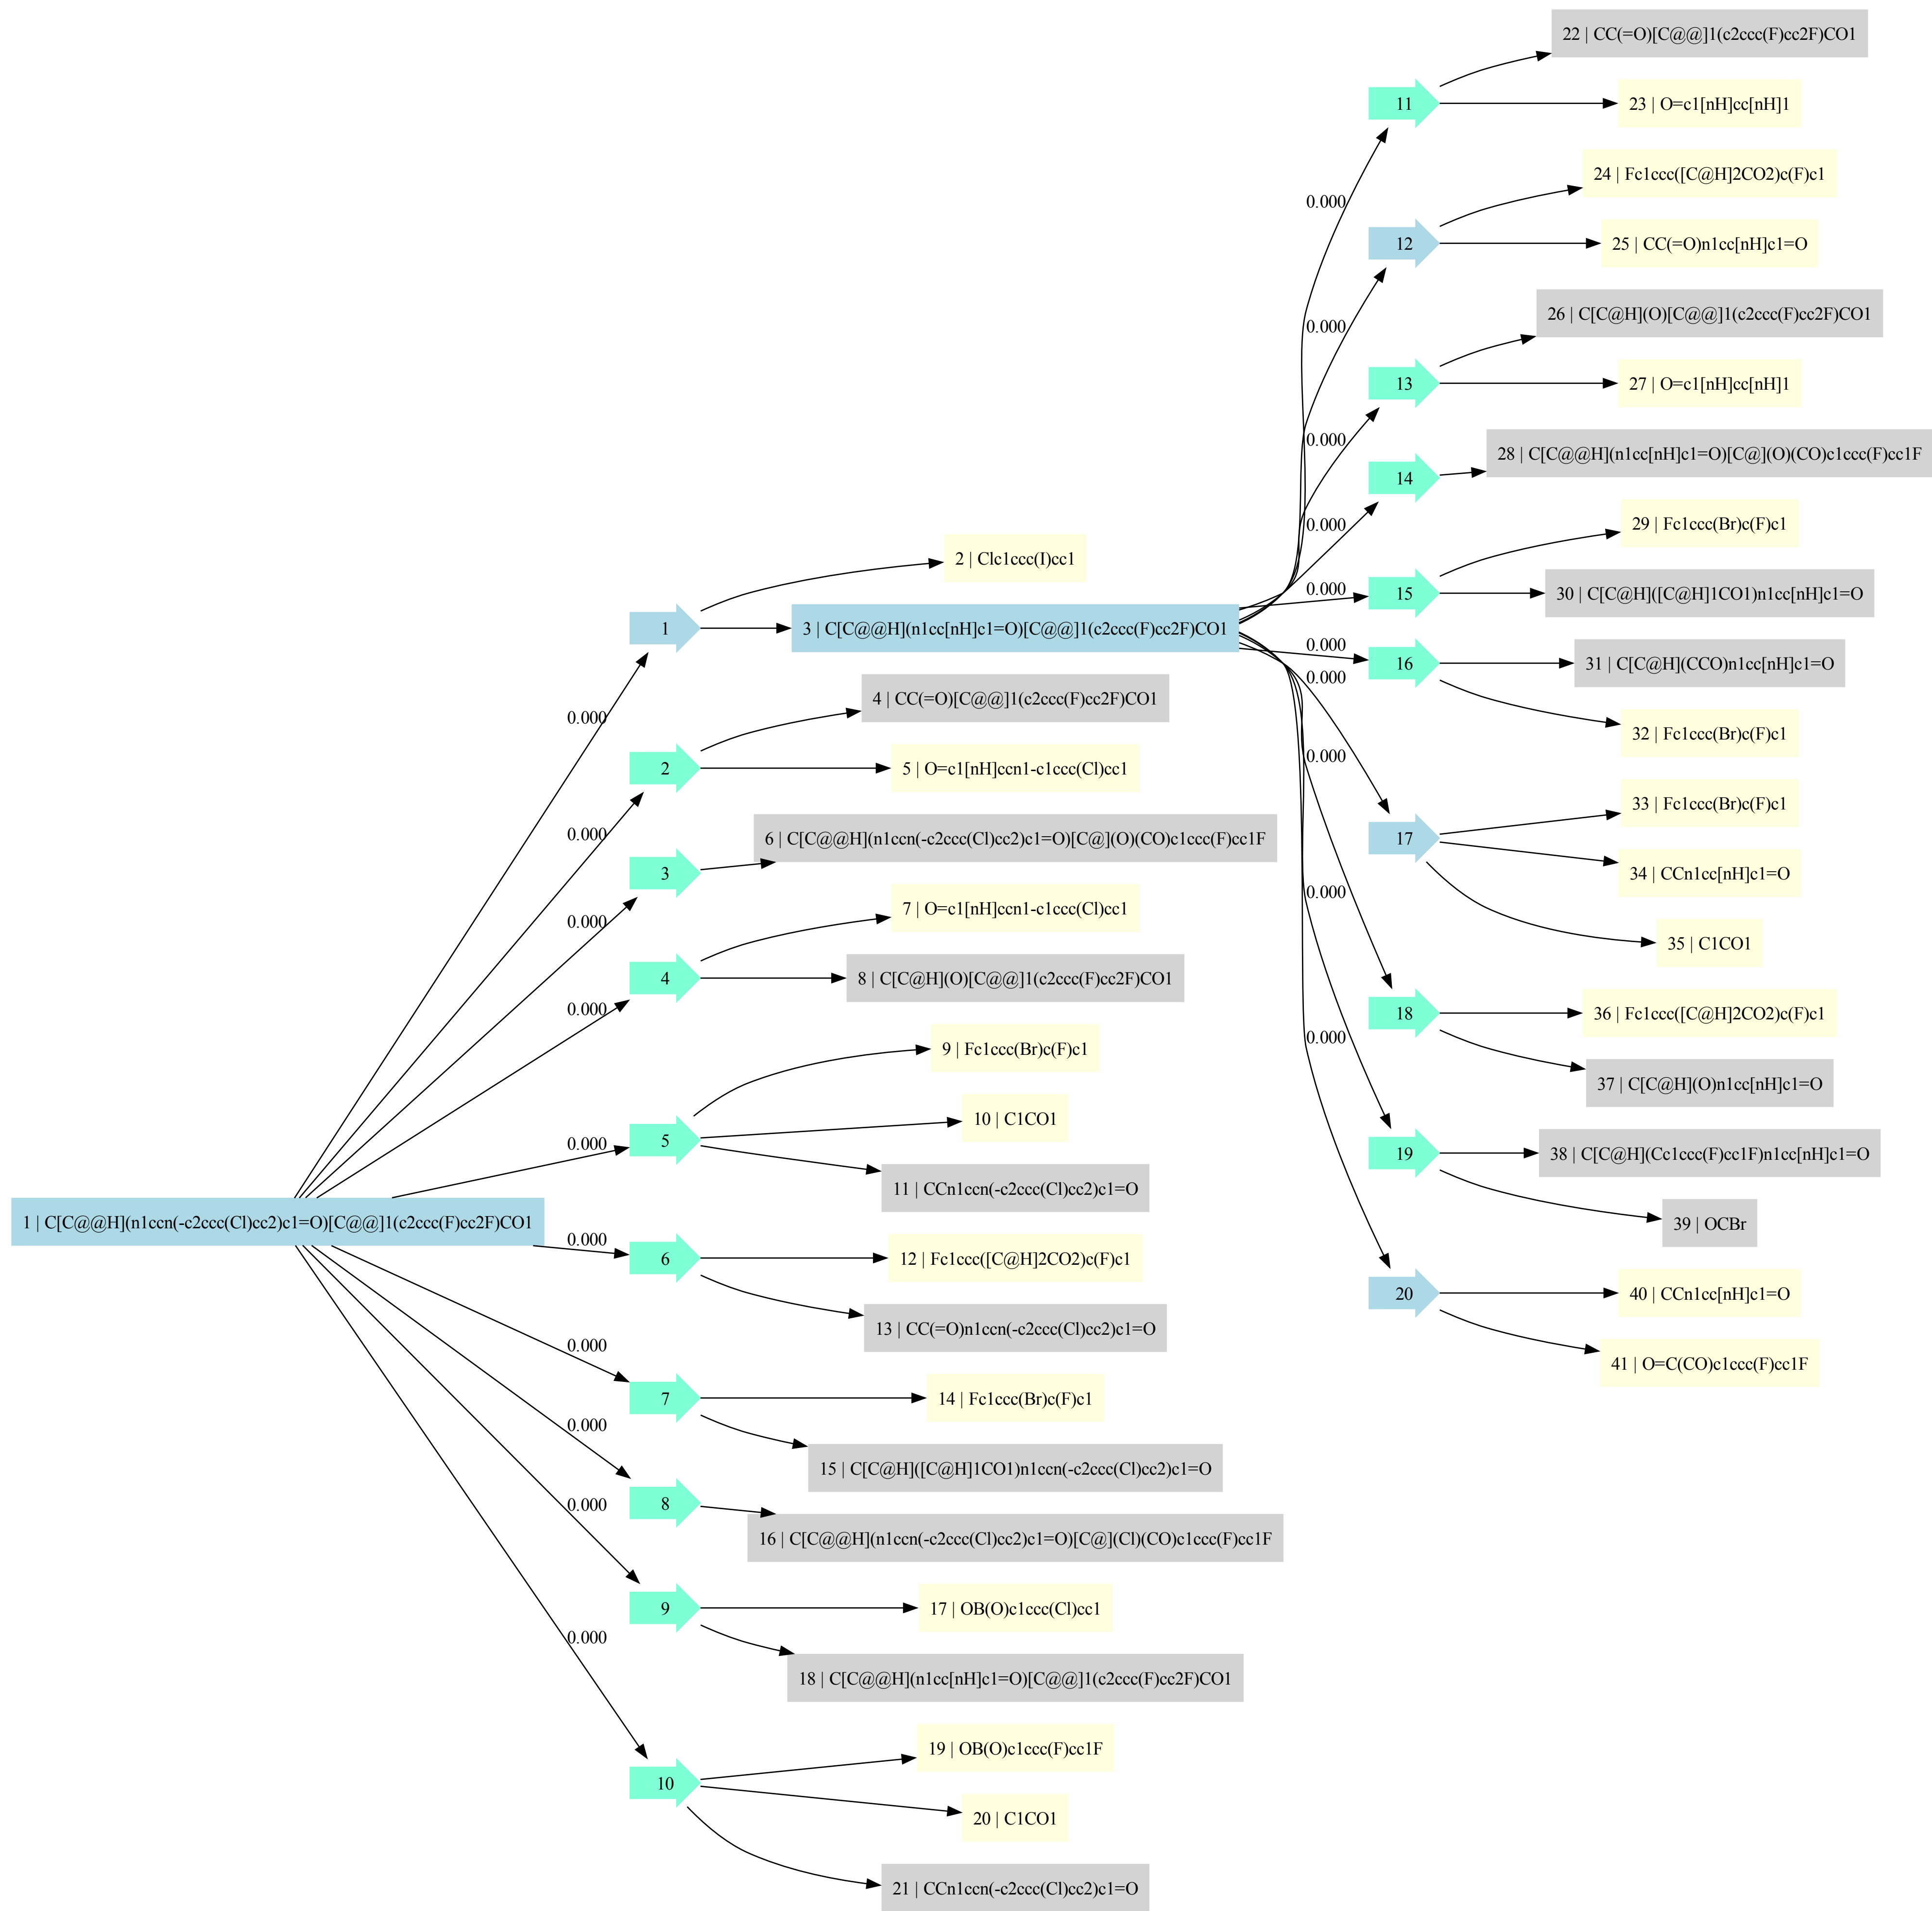

Supplement: supplementary_material [file mol_173_search_tree.pdf › materials9084/retro190_solutions/mol_173_search_tree.pdf]

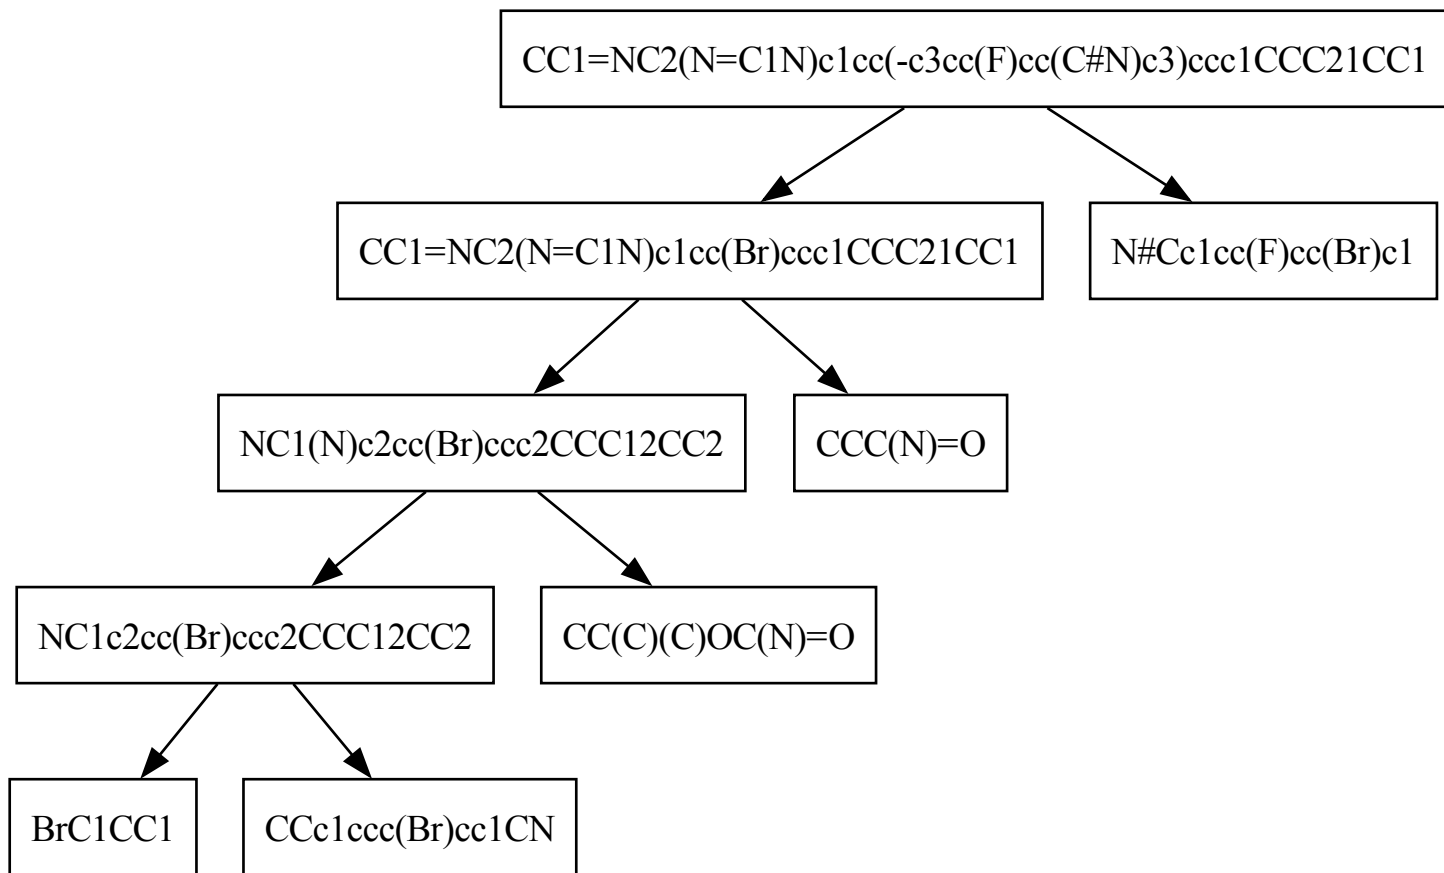

Supplement: supplementary_material [file mol_176_route_optimal.pdf › materials9084/retro190_solutions/mol_176_route_optimal.pdf]

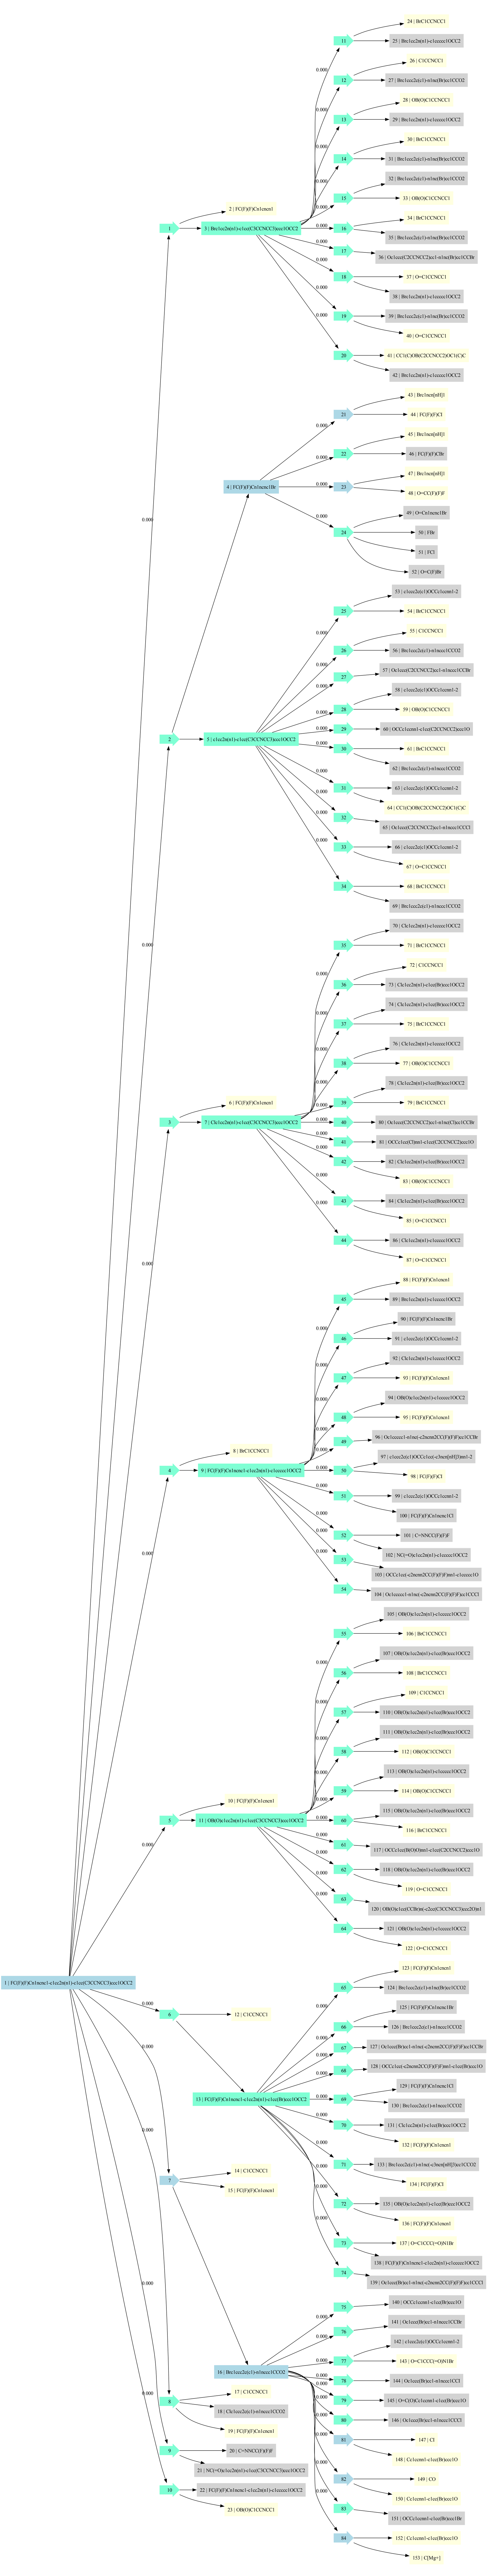

Supplement: supplementary_material [file mol_177_search_tree.pdf › materials9084/retro190_solutions/mol_177_search_tree.pdf]

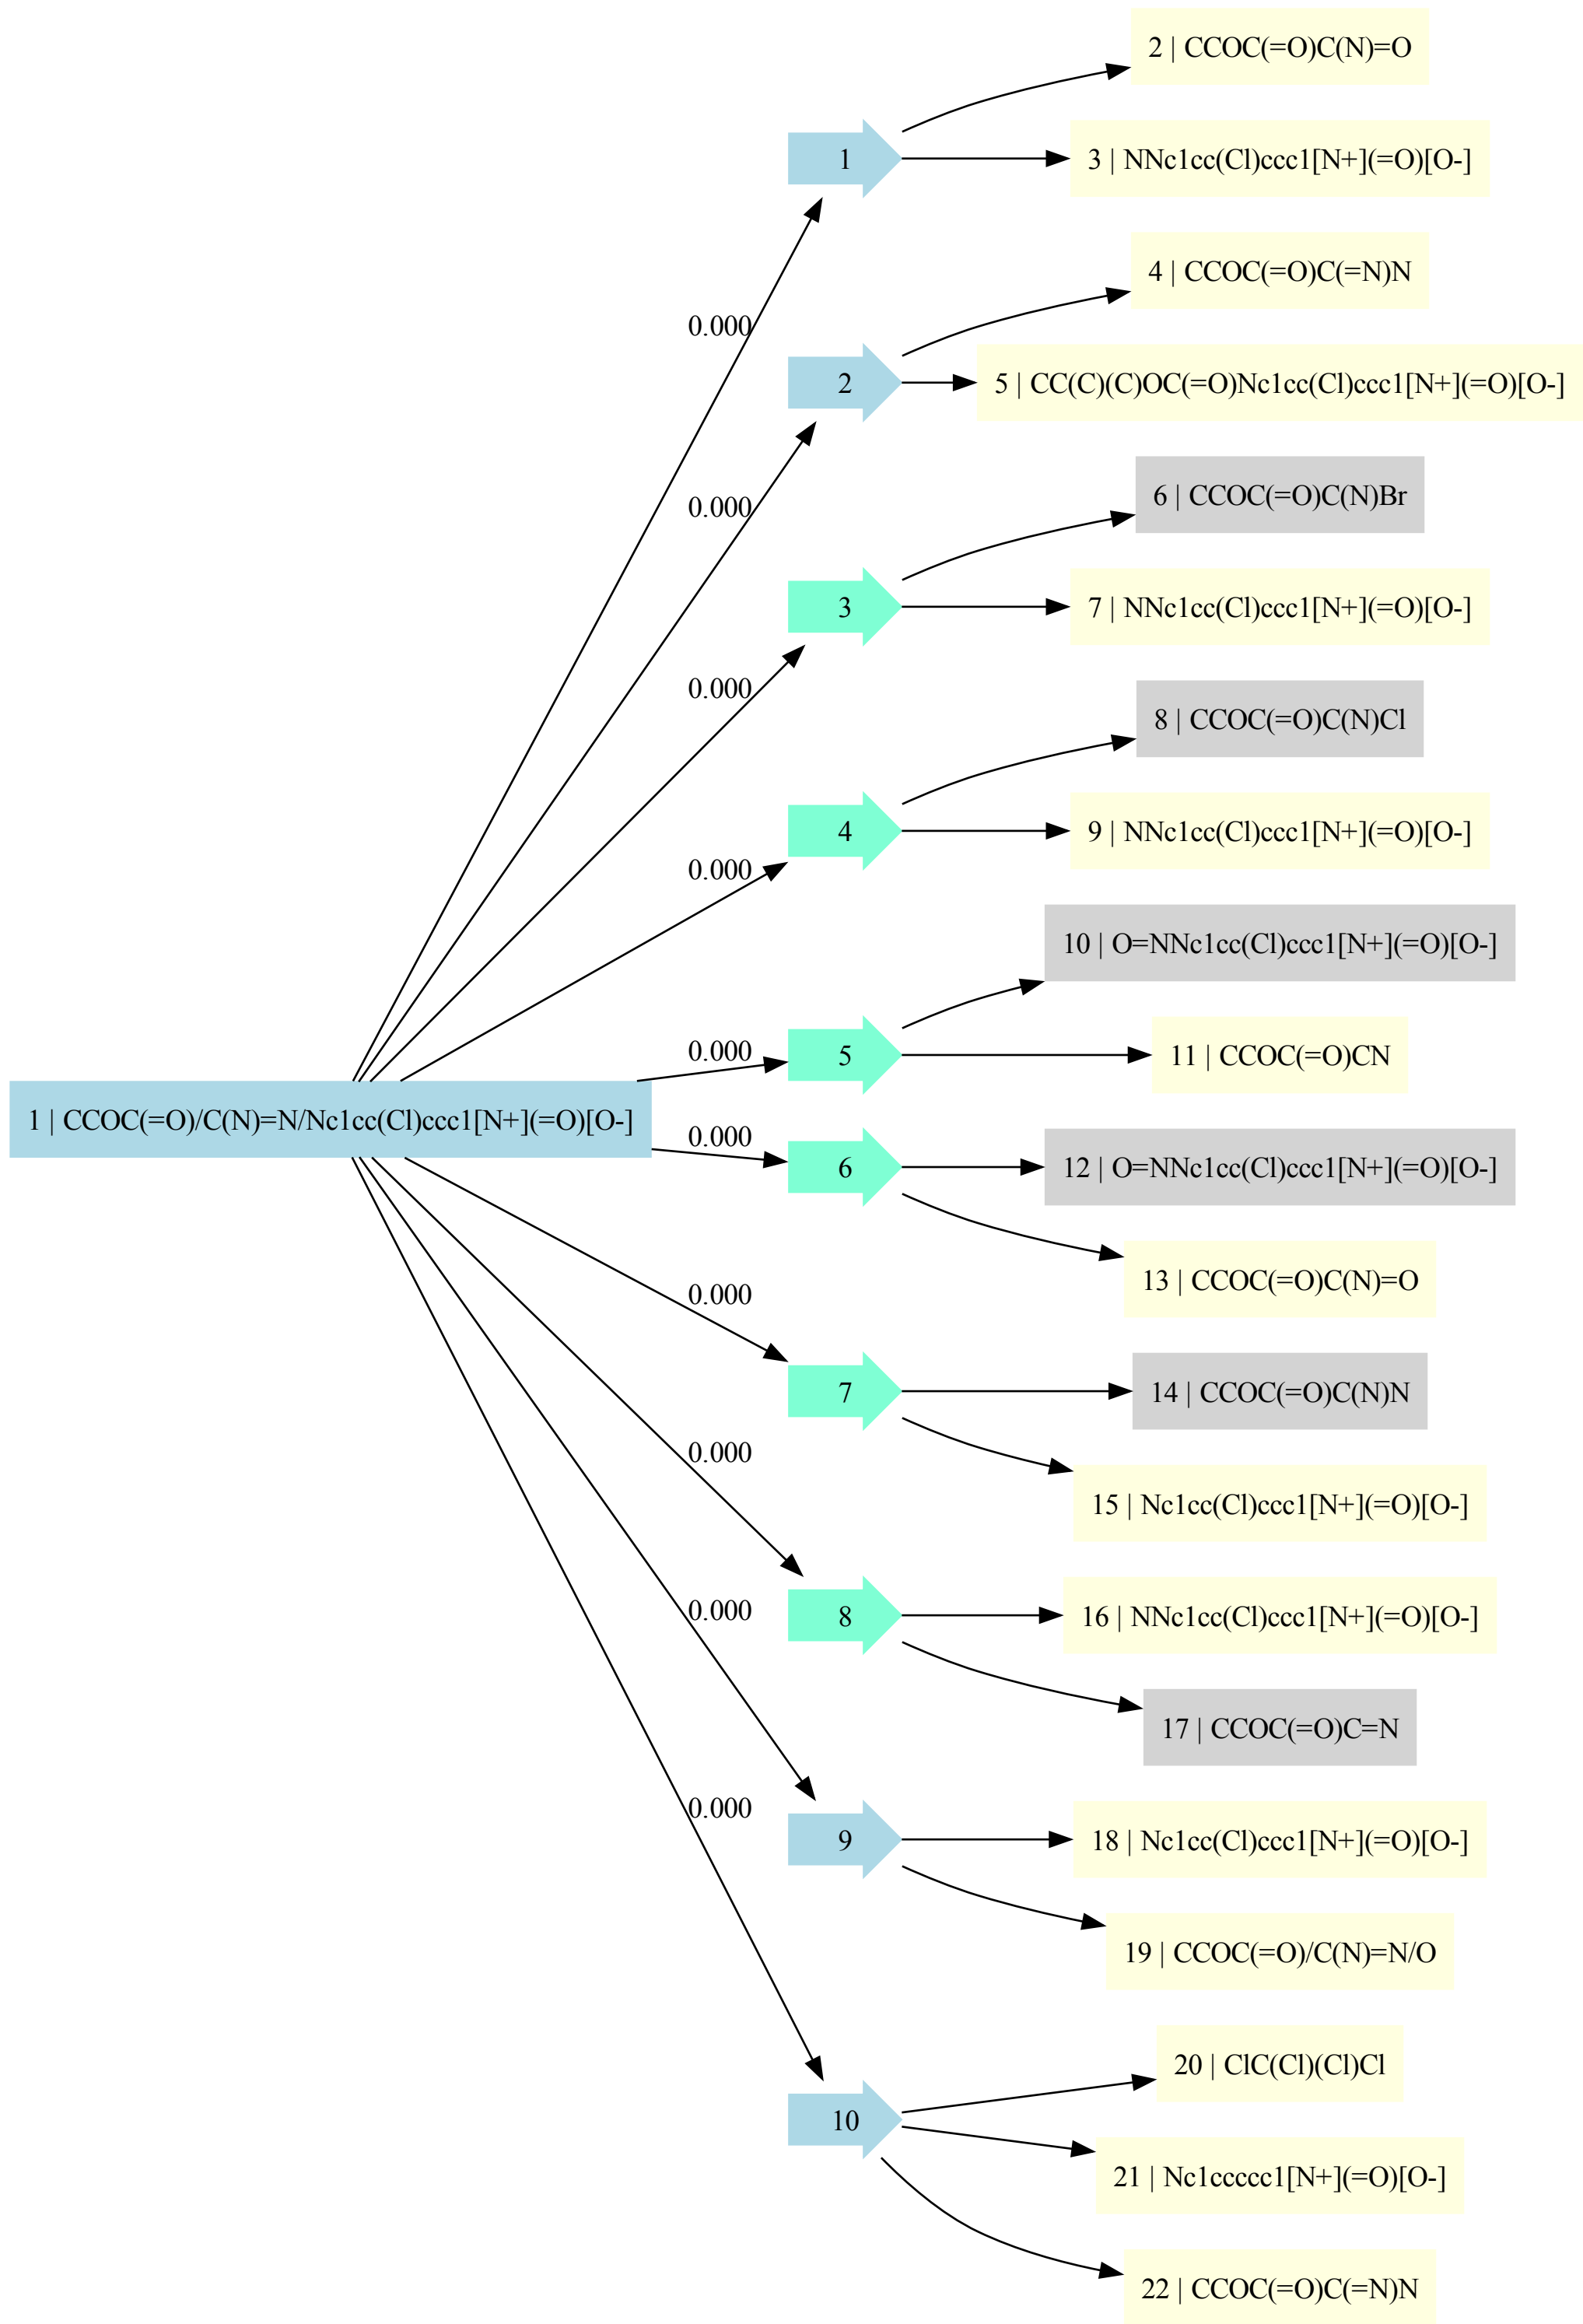

Supplement: supplementary_material [file mol_178_search_tree.pdf › materials9084/retro190_solutions/mol_178_search_tree.pdf]

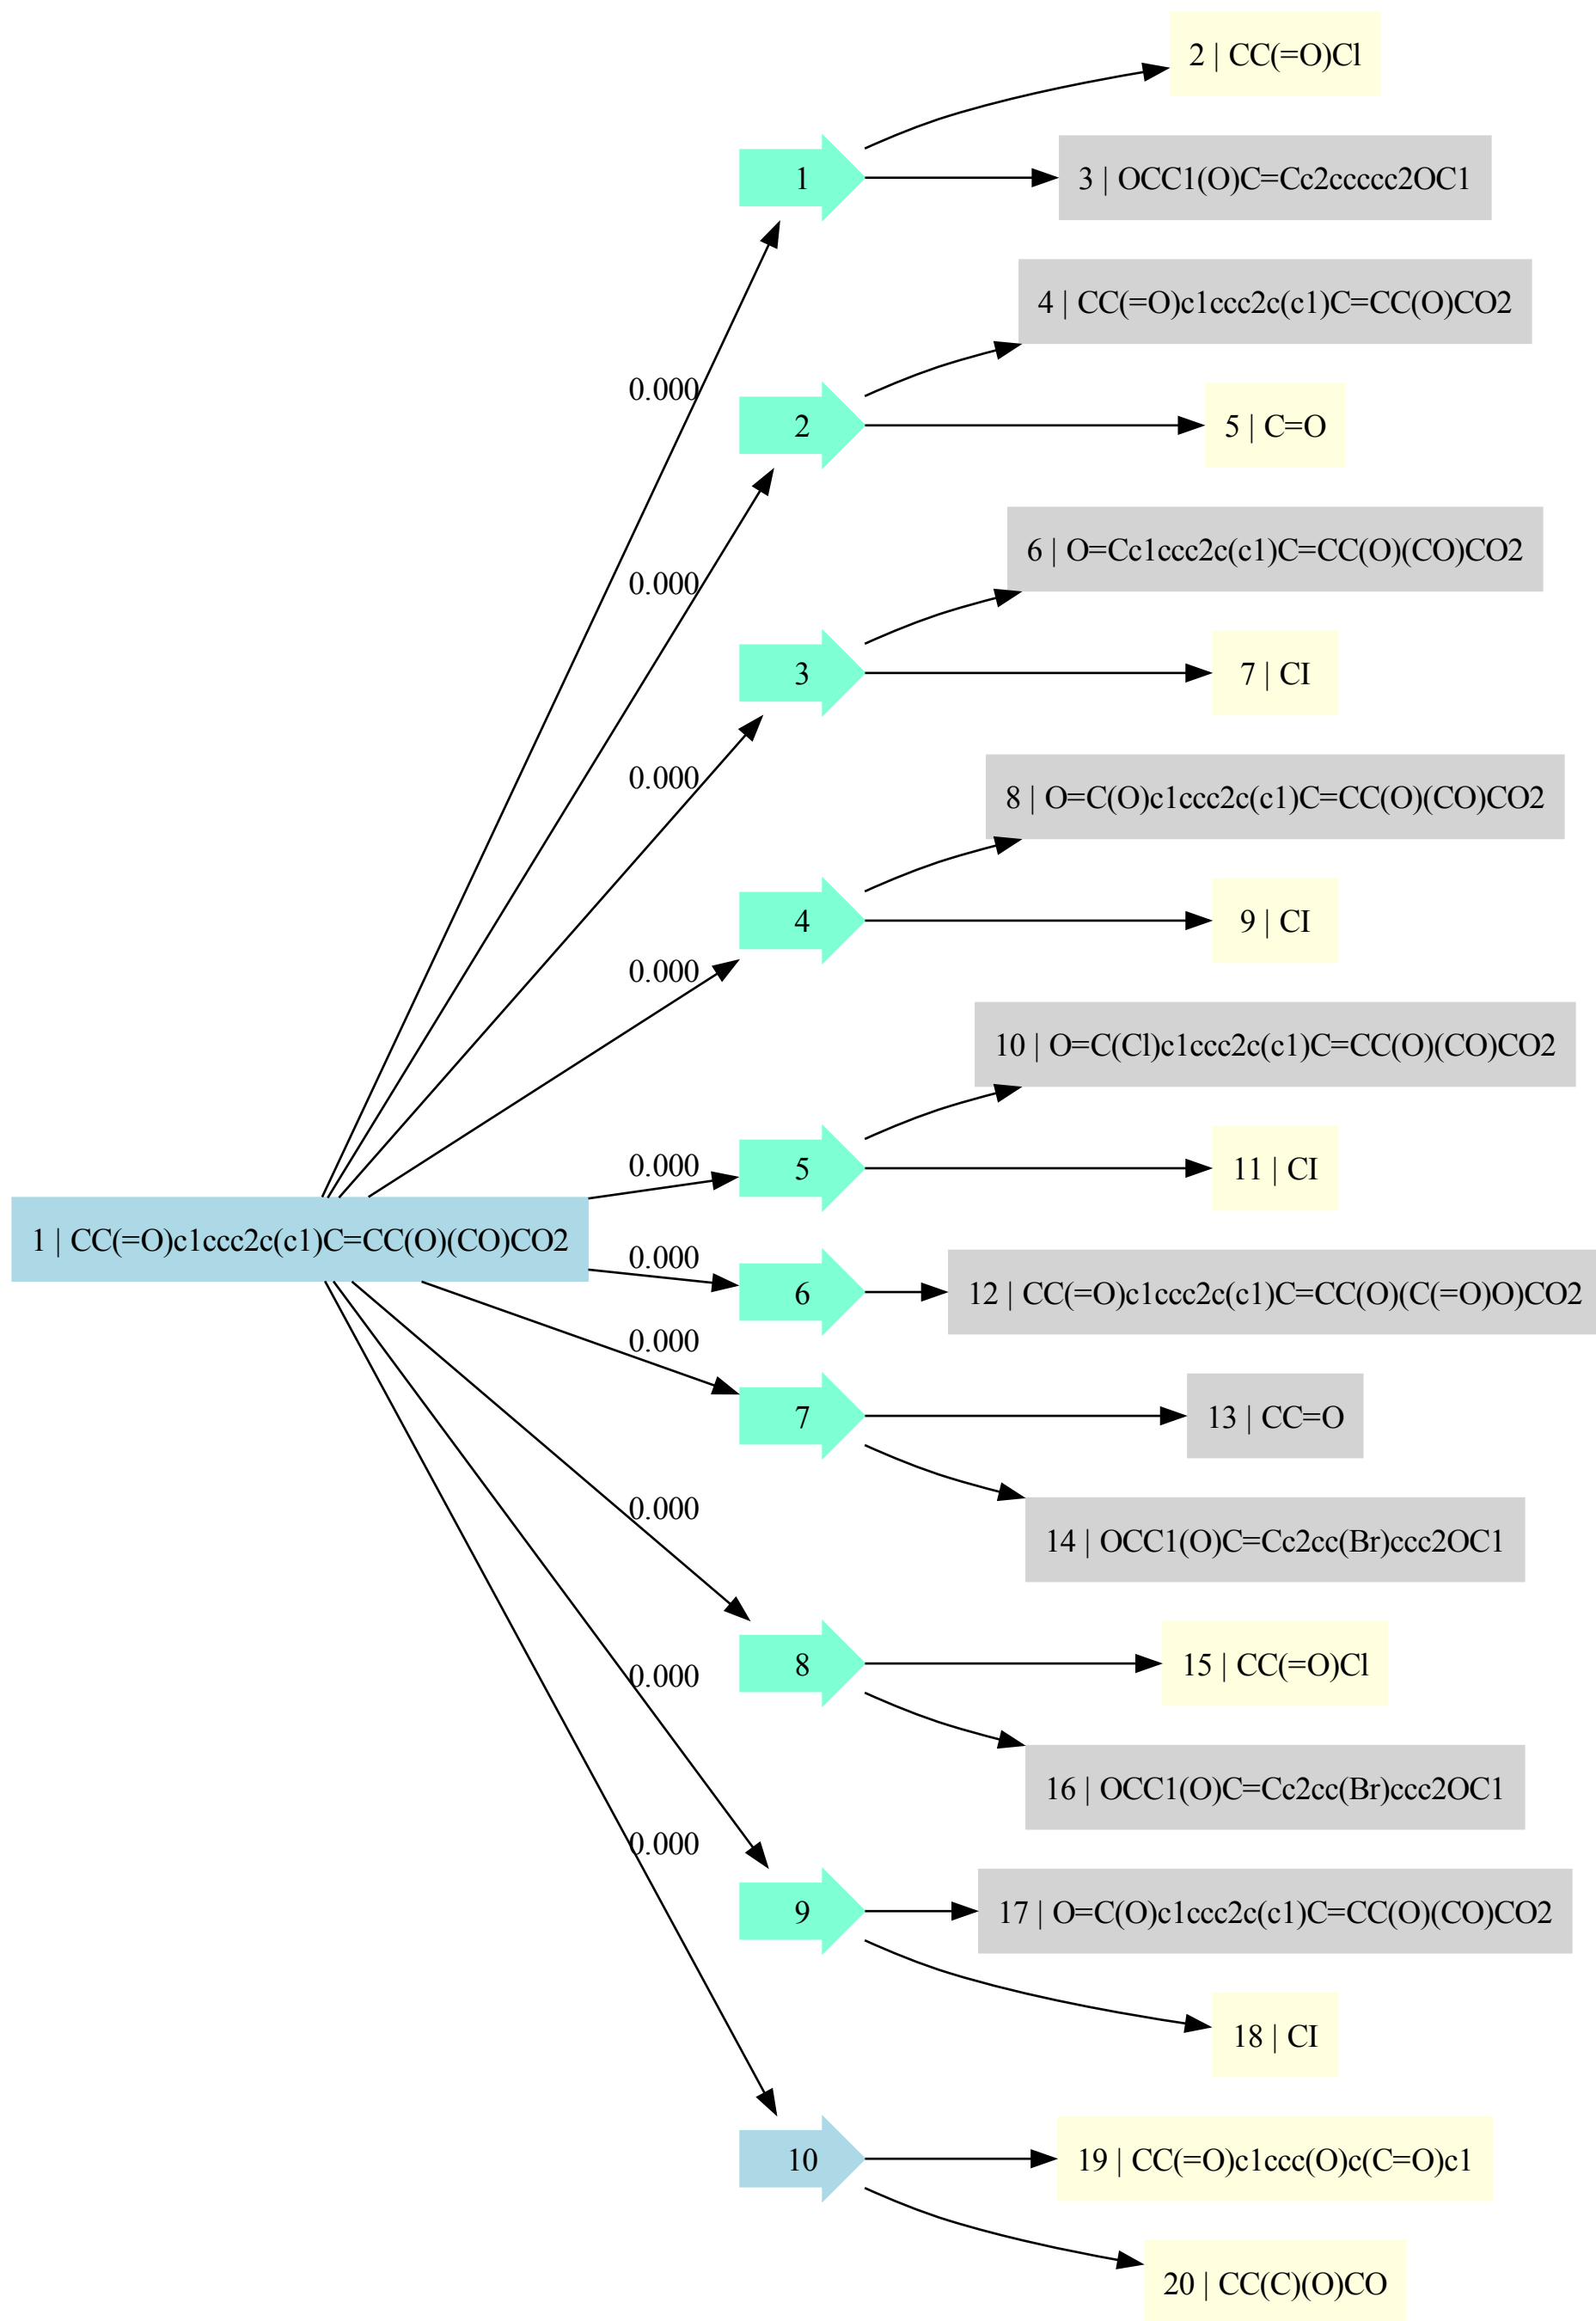

Supplement: supplementary_material [file mol_183_search_tree.pdf › materials9084/retro190_solutions/mol_183_search_tree.pdf]

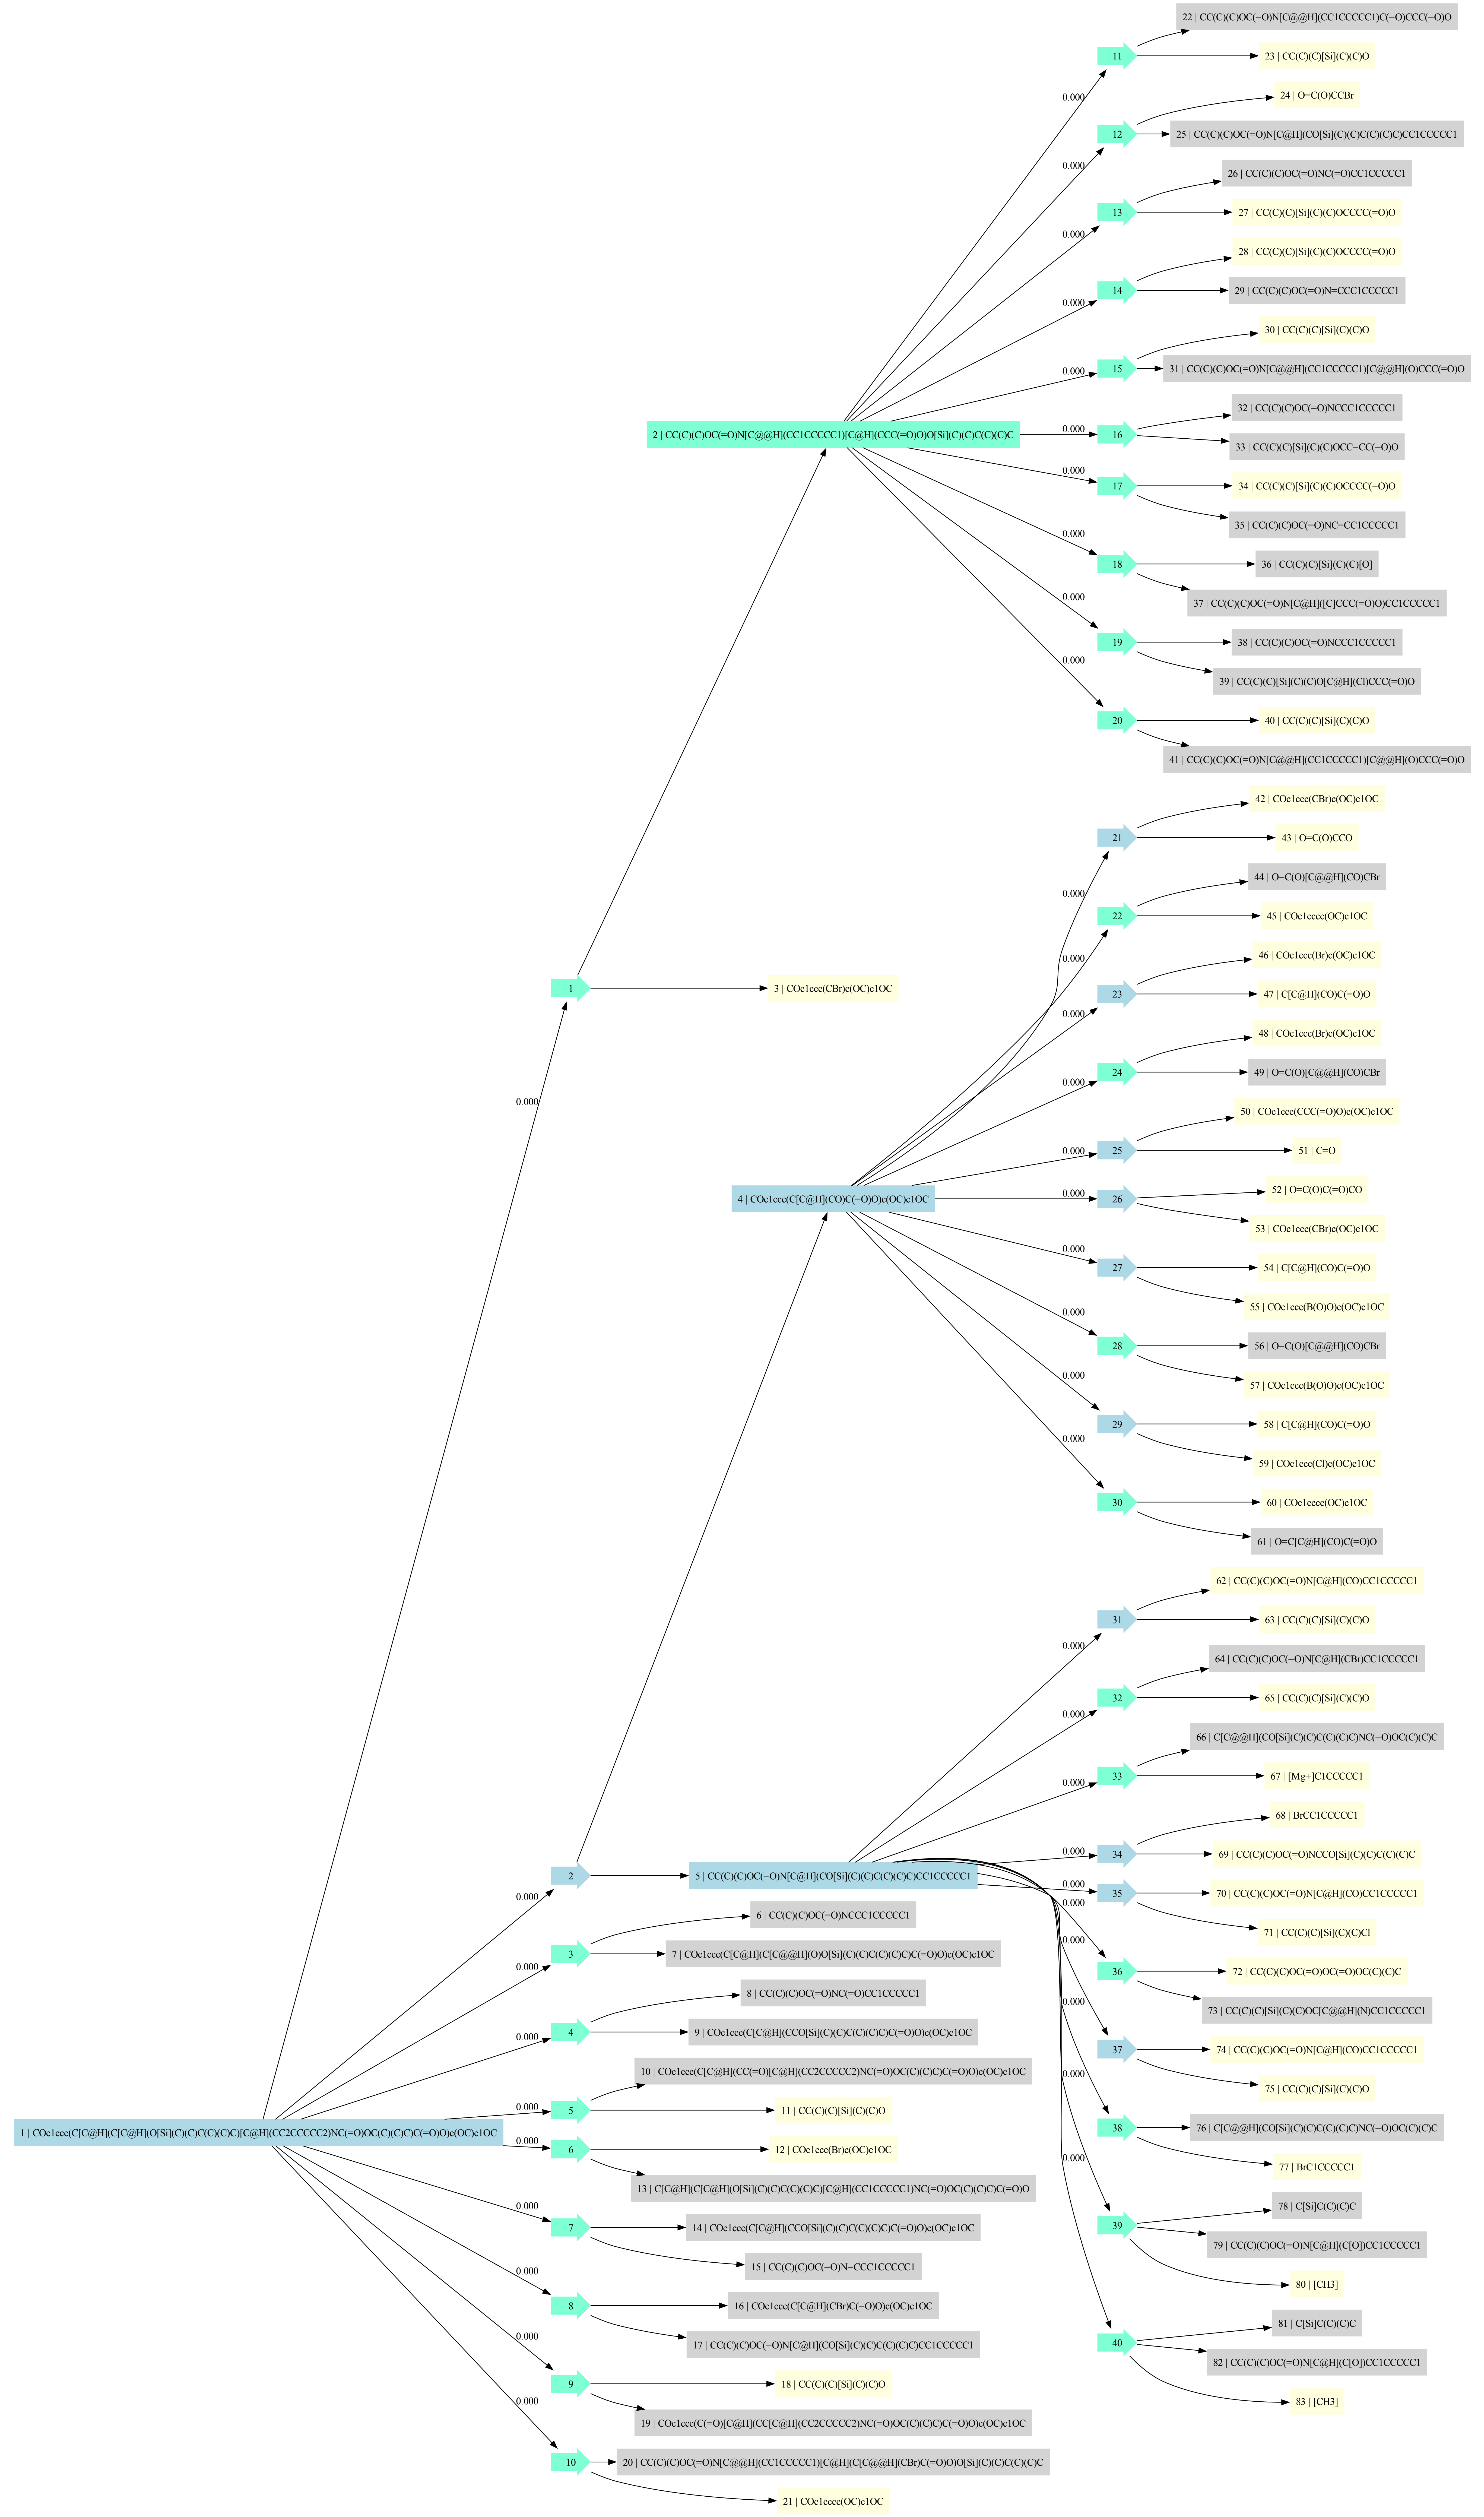

Supplement: supplementary_material [file mol_184_search_tree.pdf › materials9084/retro190_solutions/mol_184_search_tree.pdf]

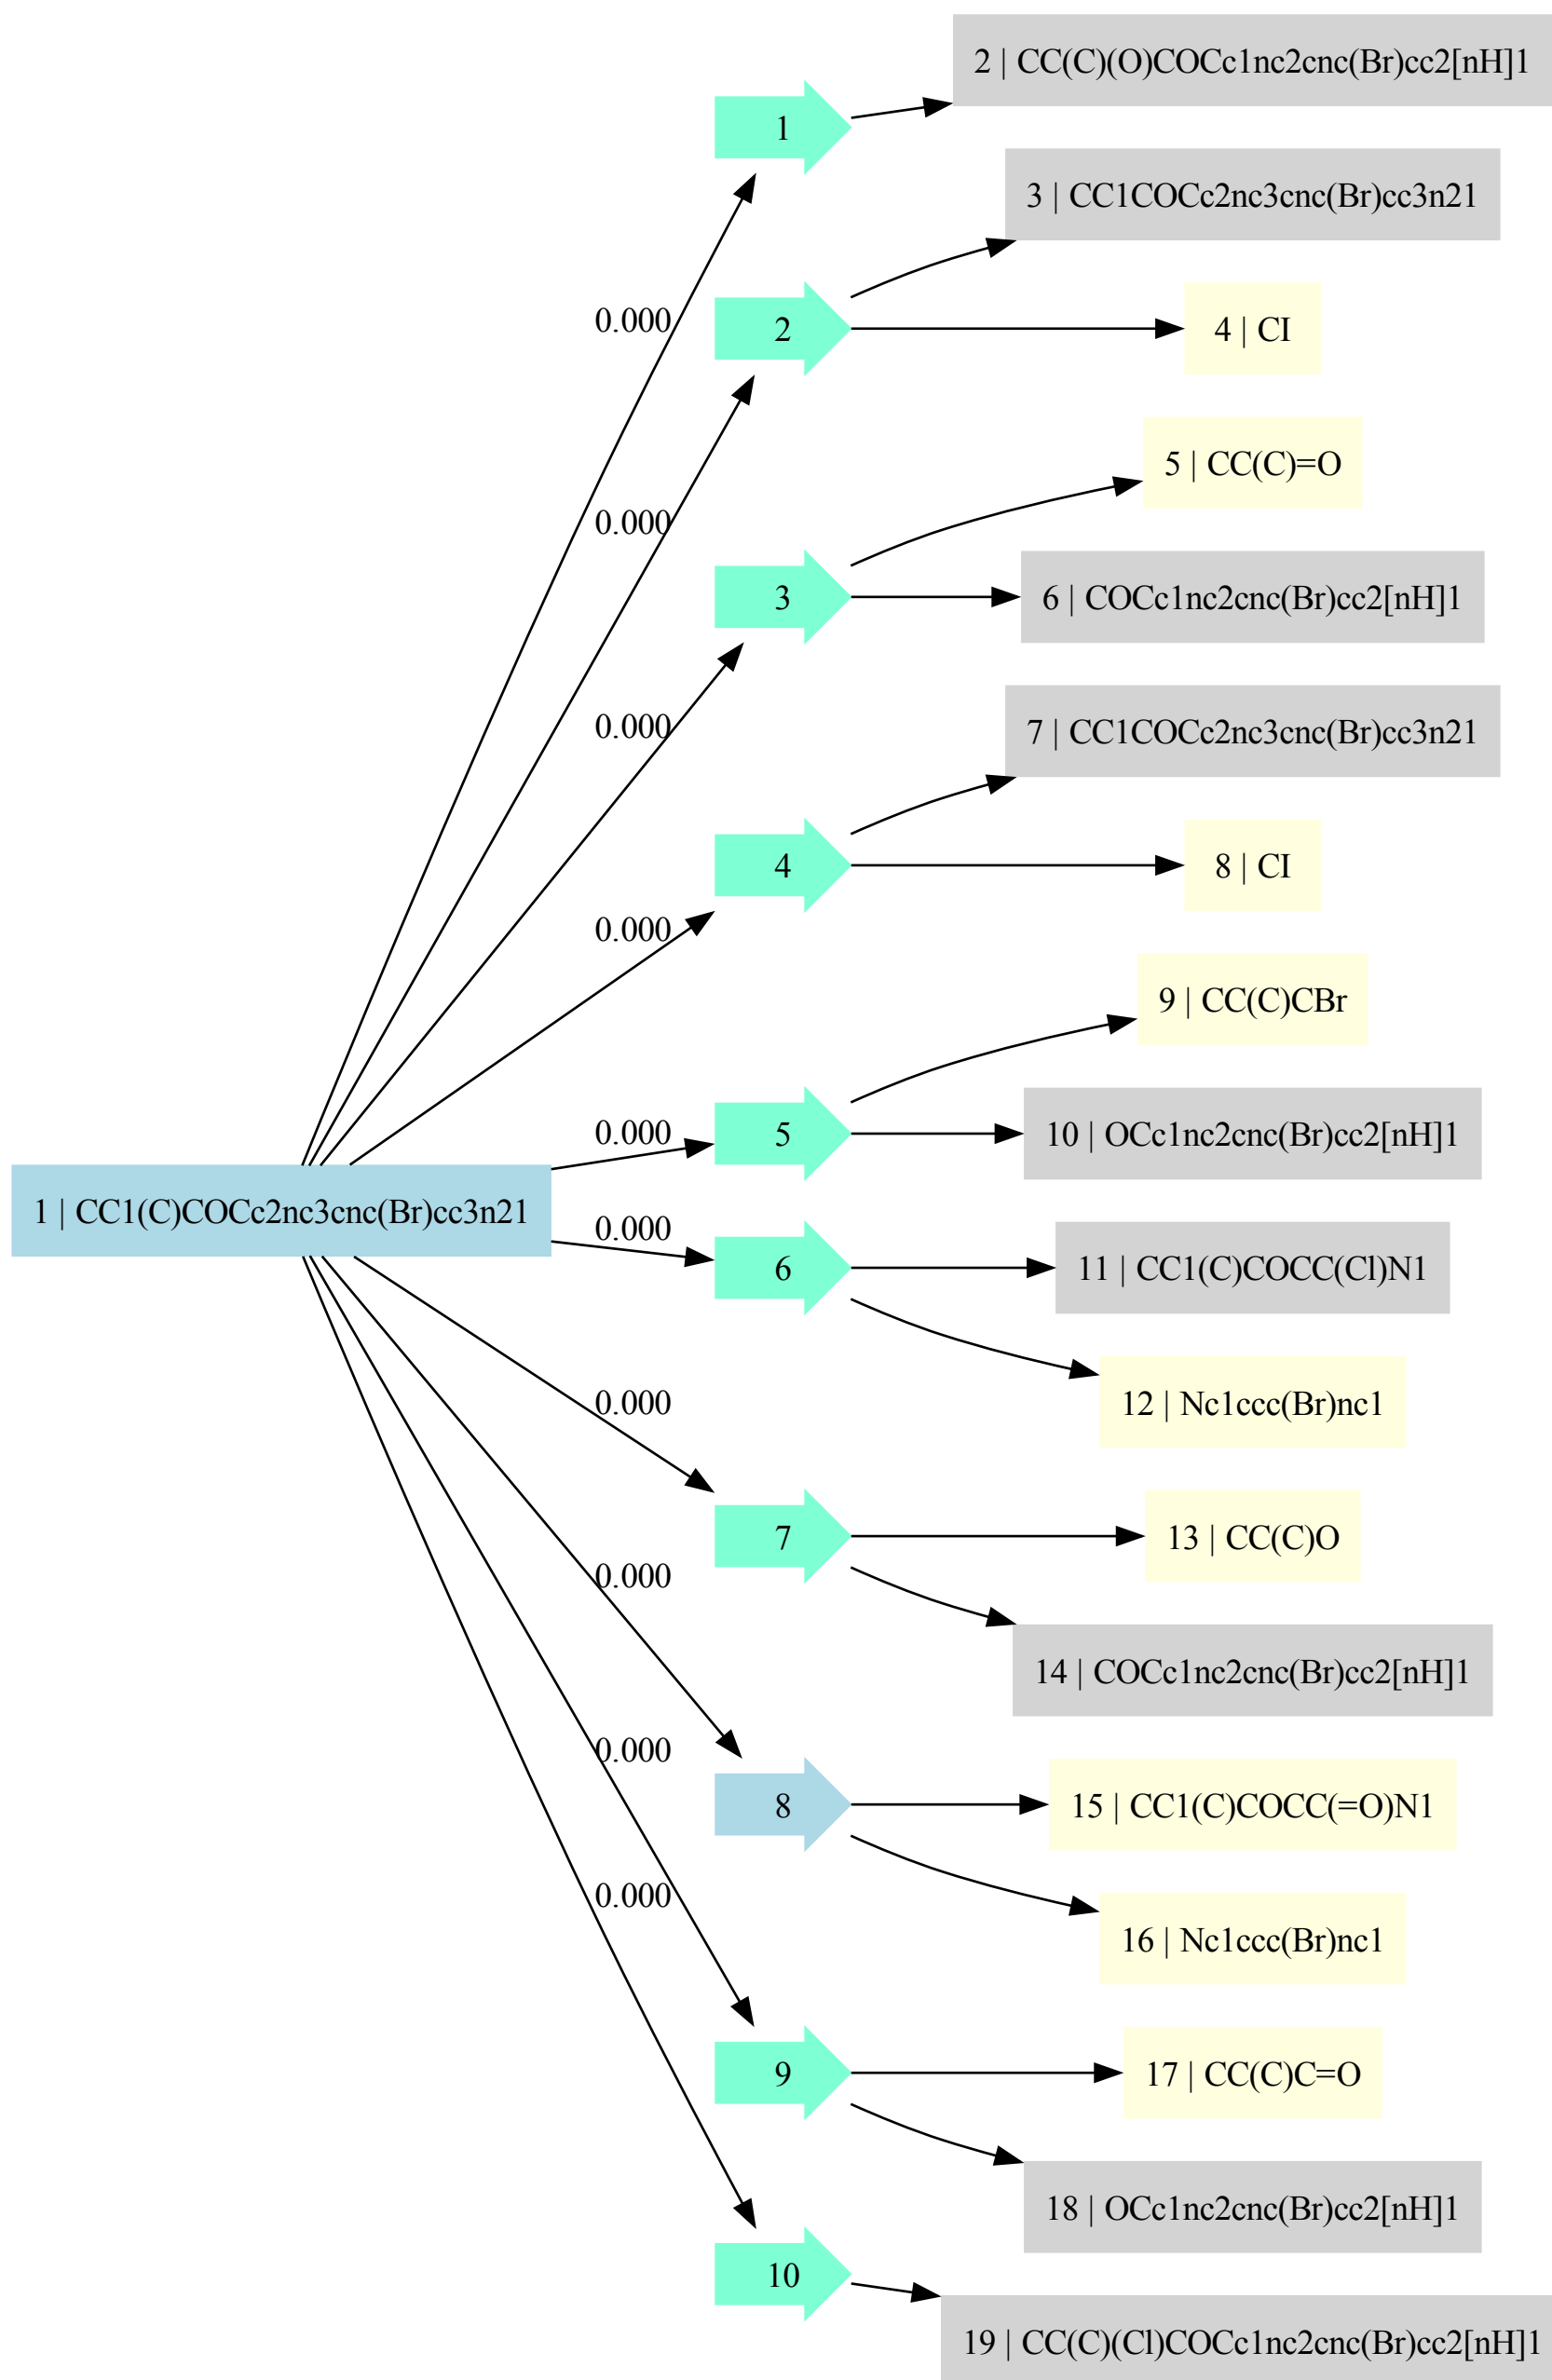

Supplement: supplementary_material [file mol_186_search_tree.pdf › materials9084/retro190_solutions/mol_186_search_tree.pdf]

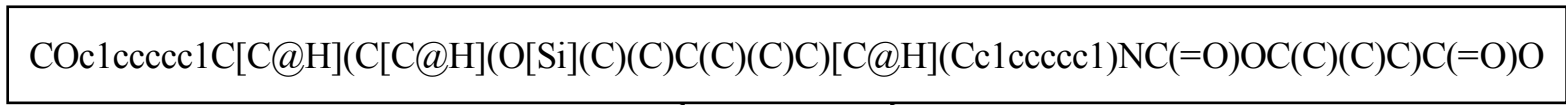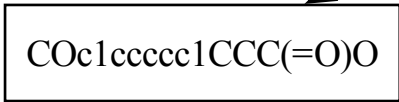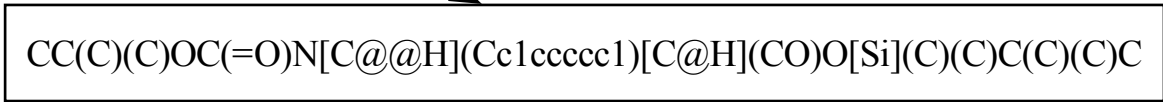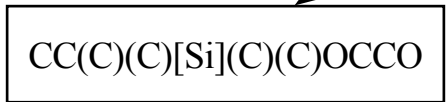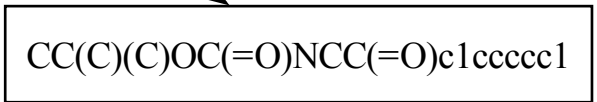

Supplement: supplementary_material [file mol_187_route_optimal.pdf › materials9084/retro190_solutions/mol_187_route_optimal.pdf]

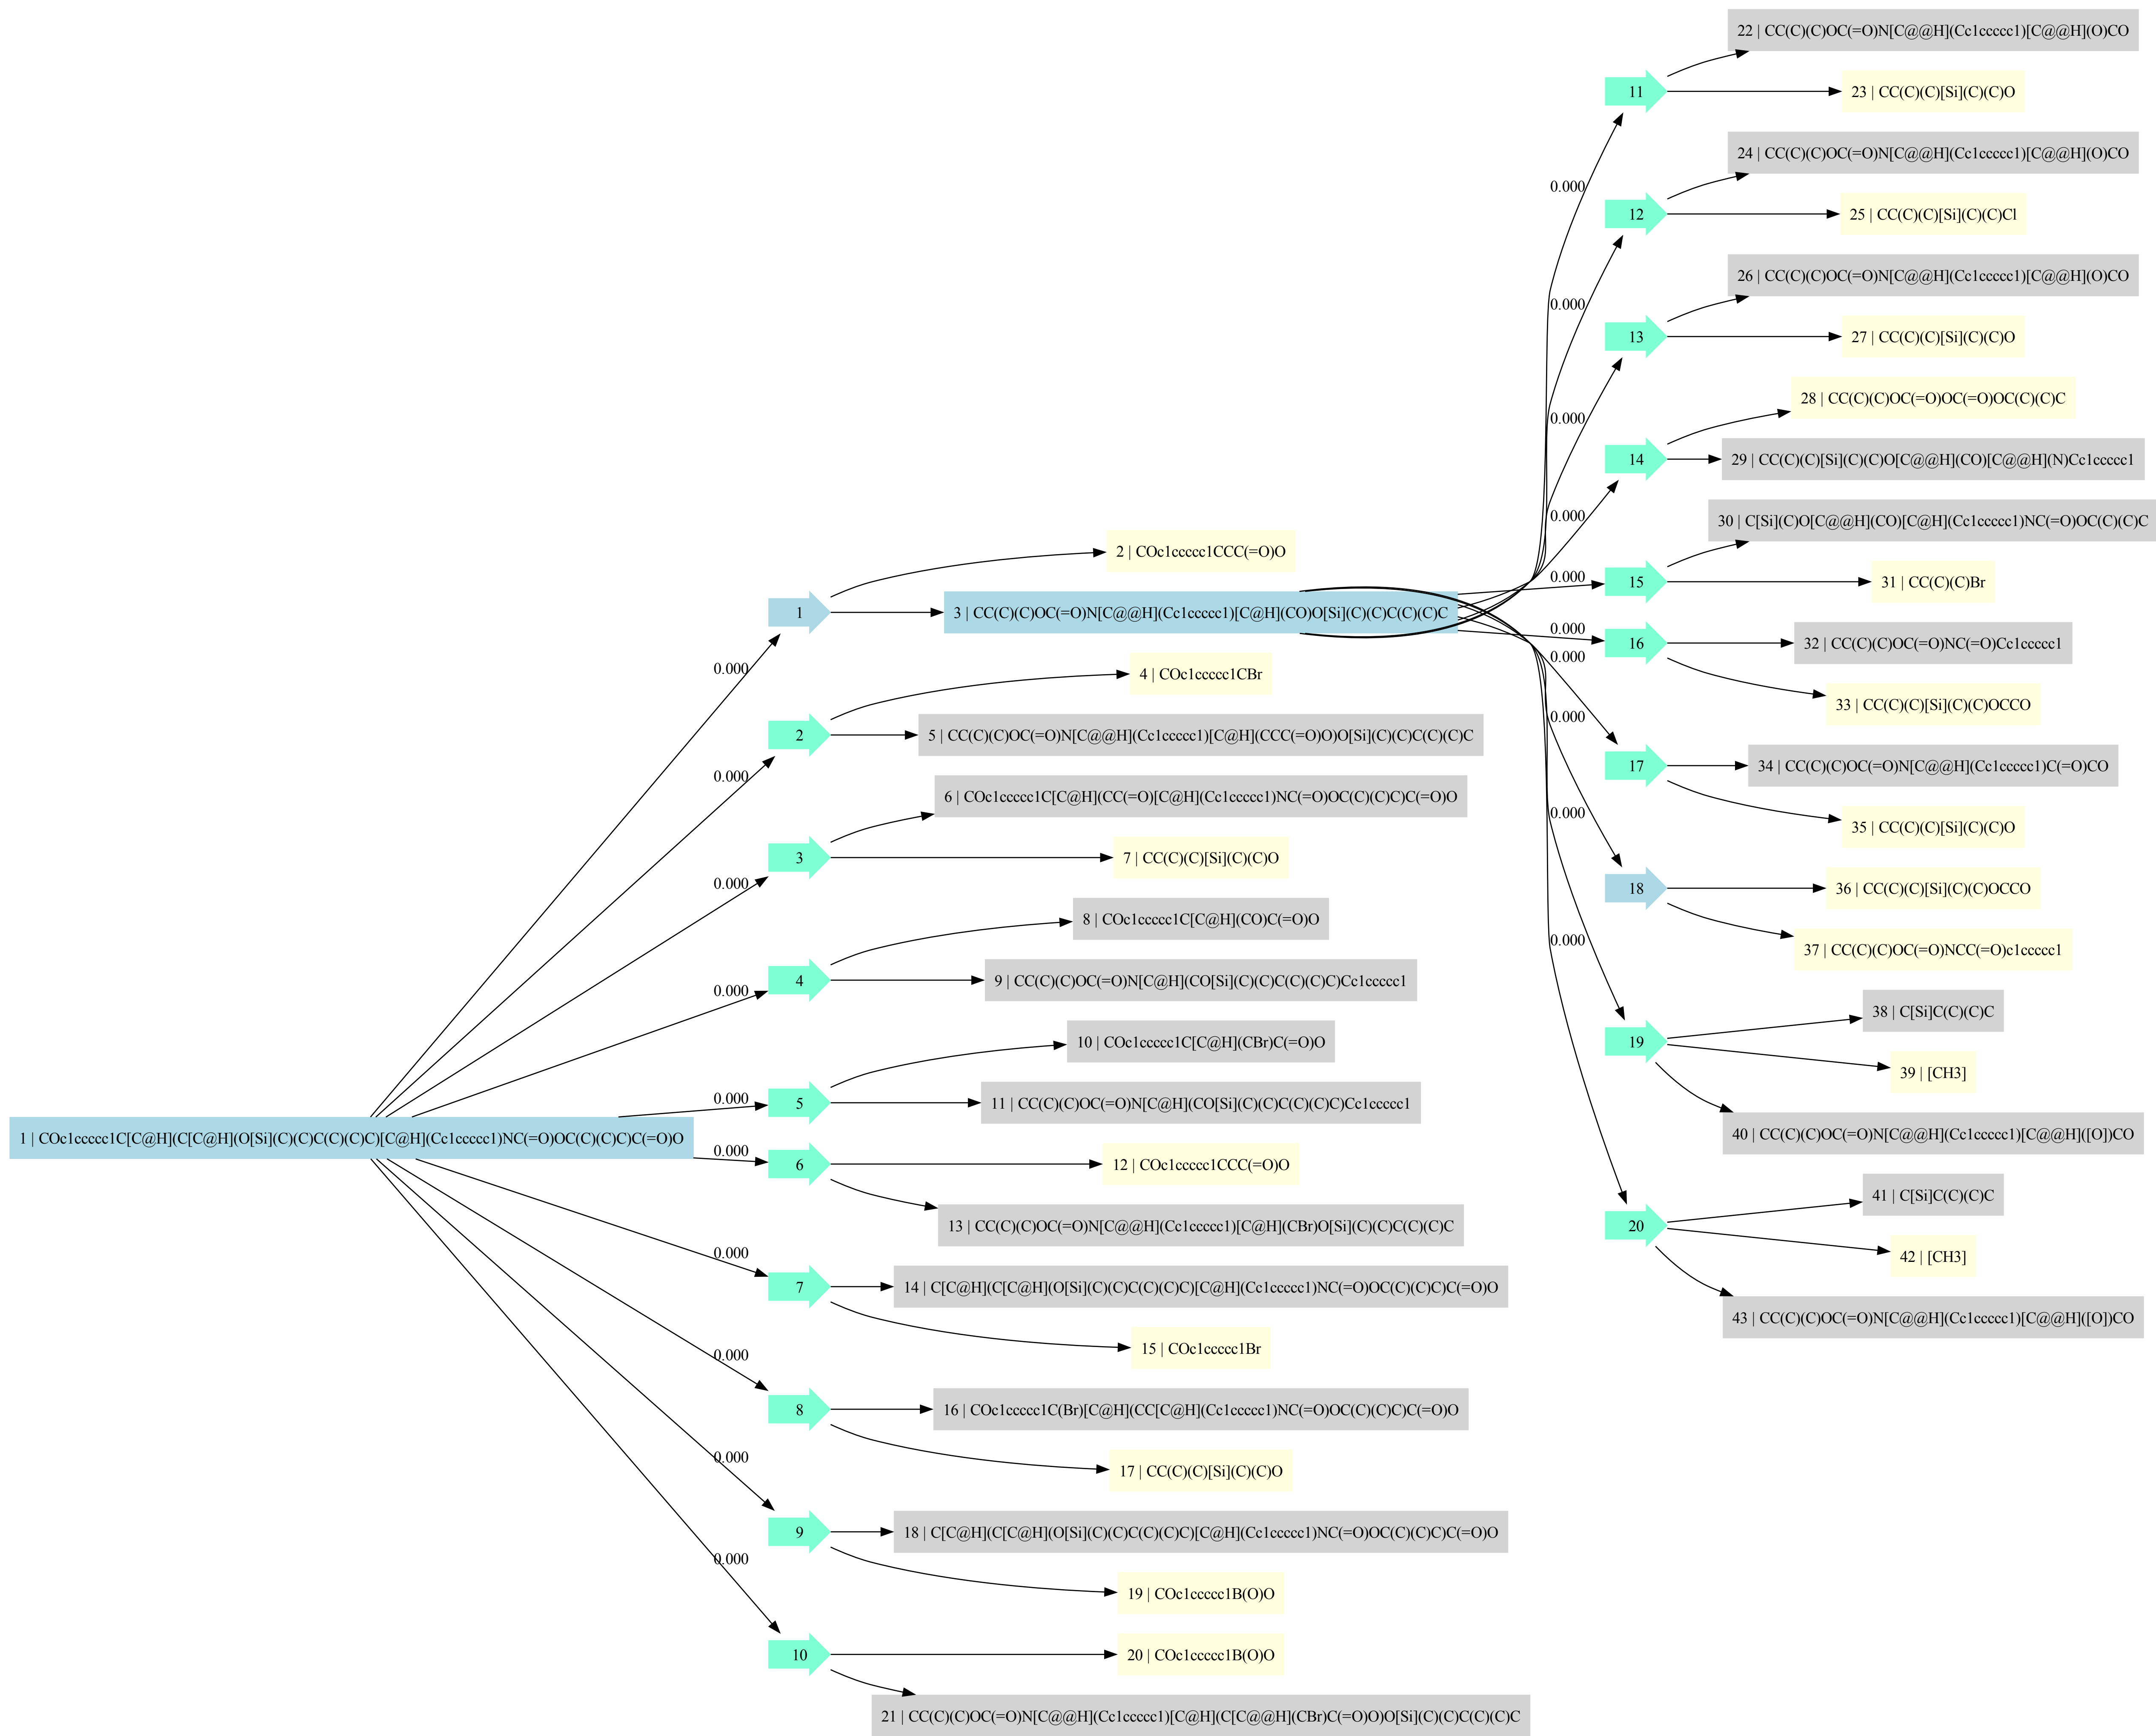

Supplement: supplementary_material [file mol_187_search_tree.pdf › materials9084/retro190_solutions/mol_187_search_tree.pdf]

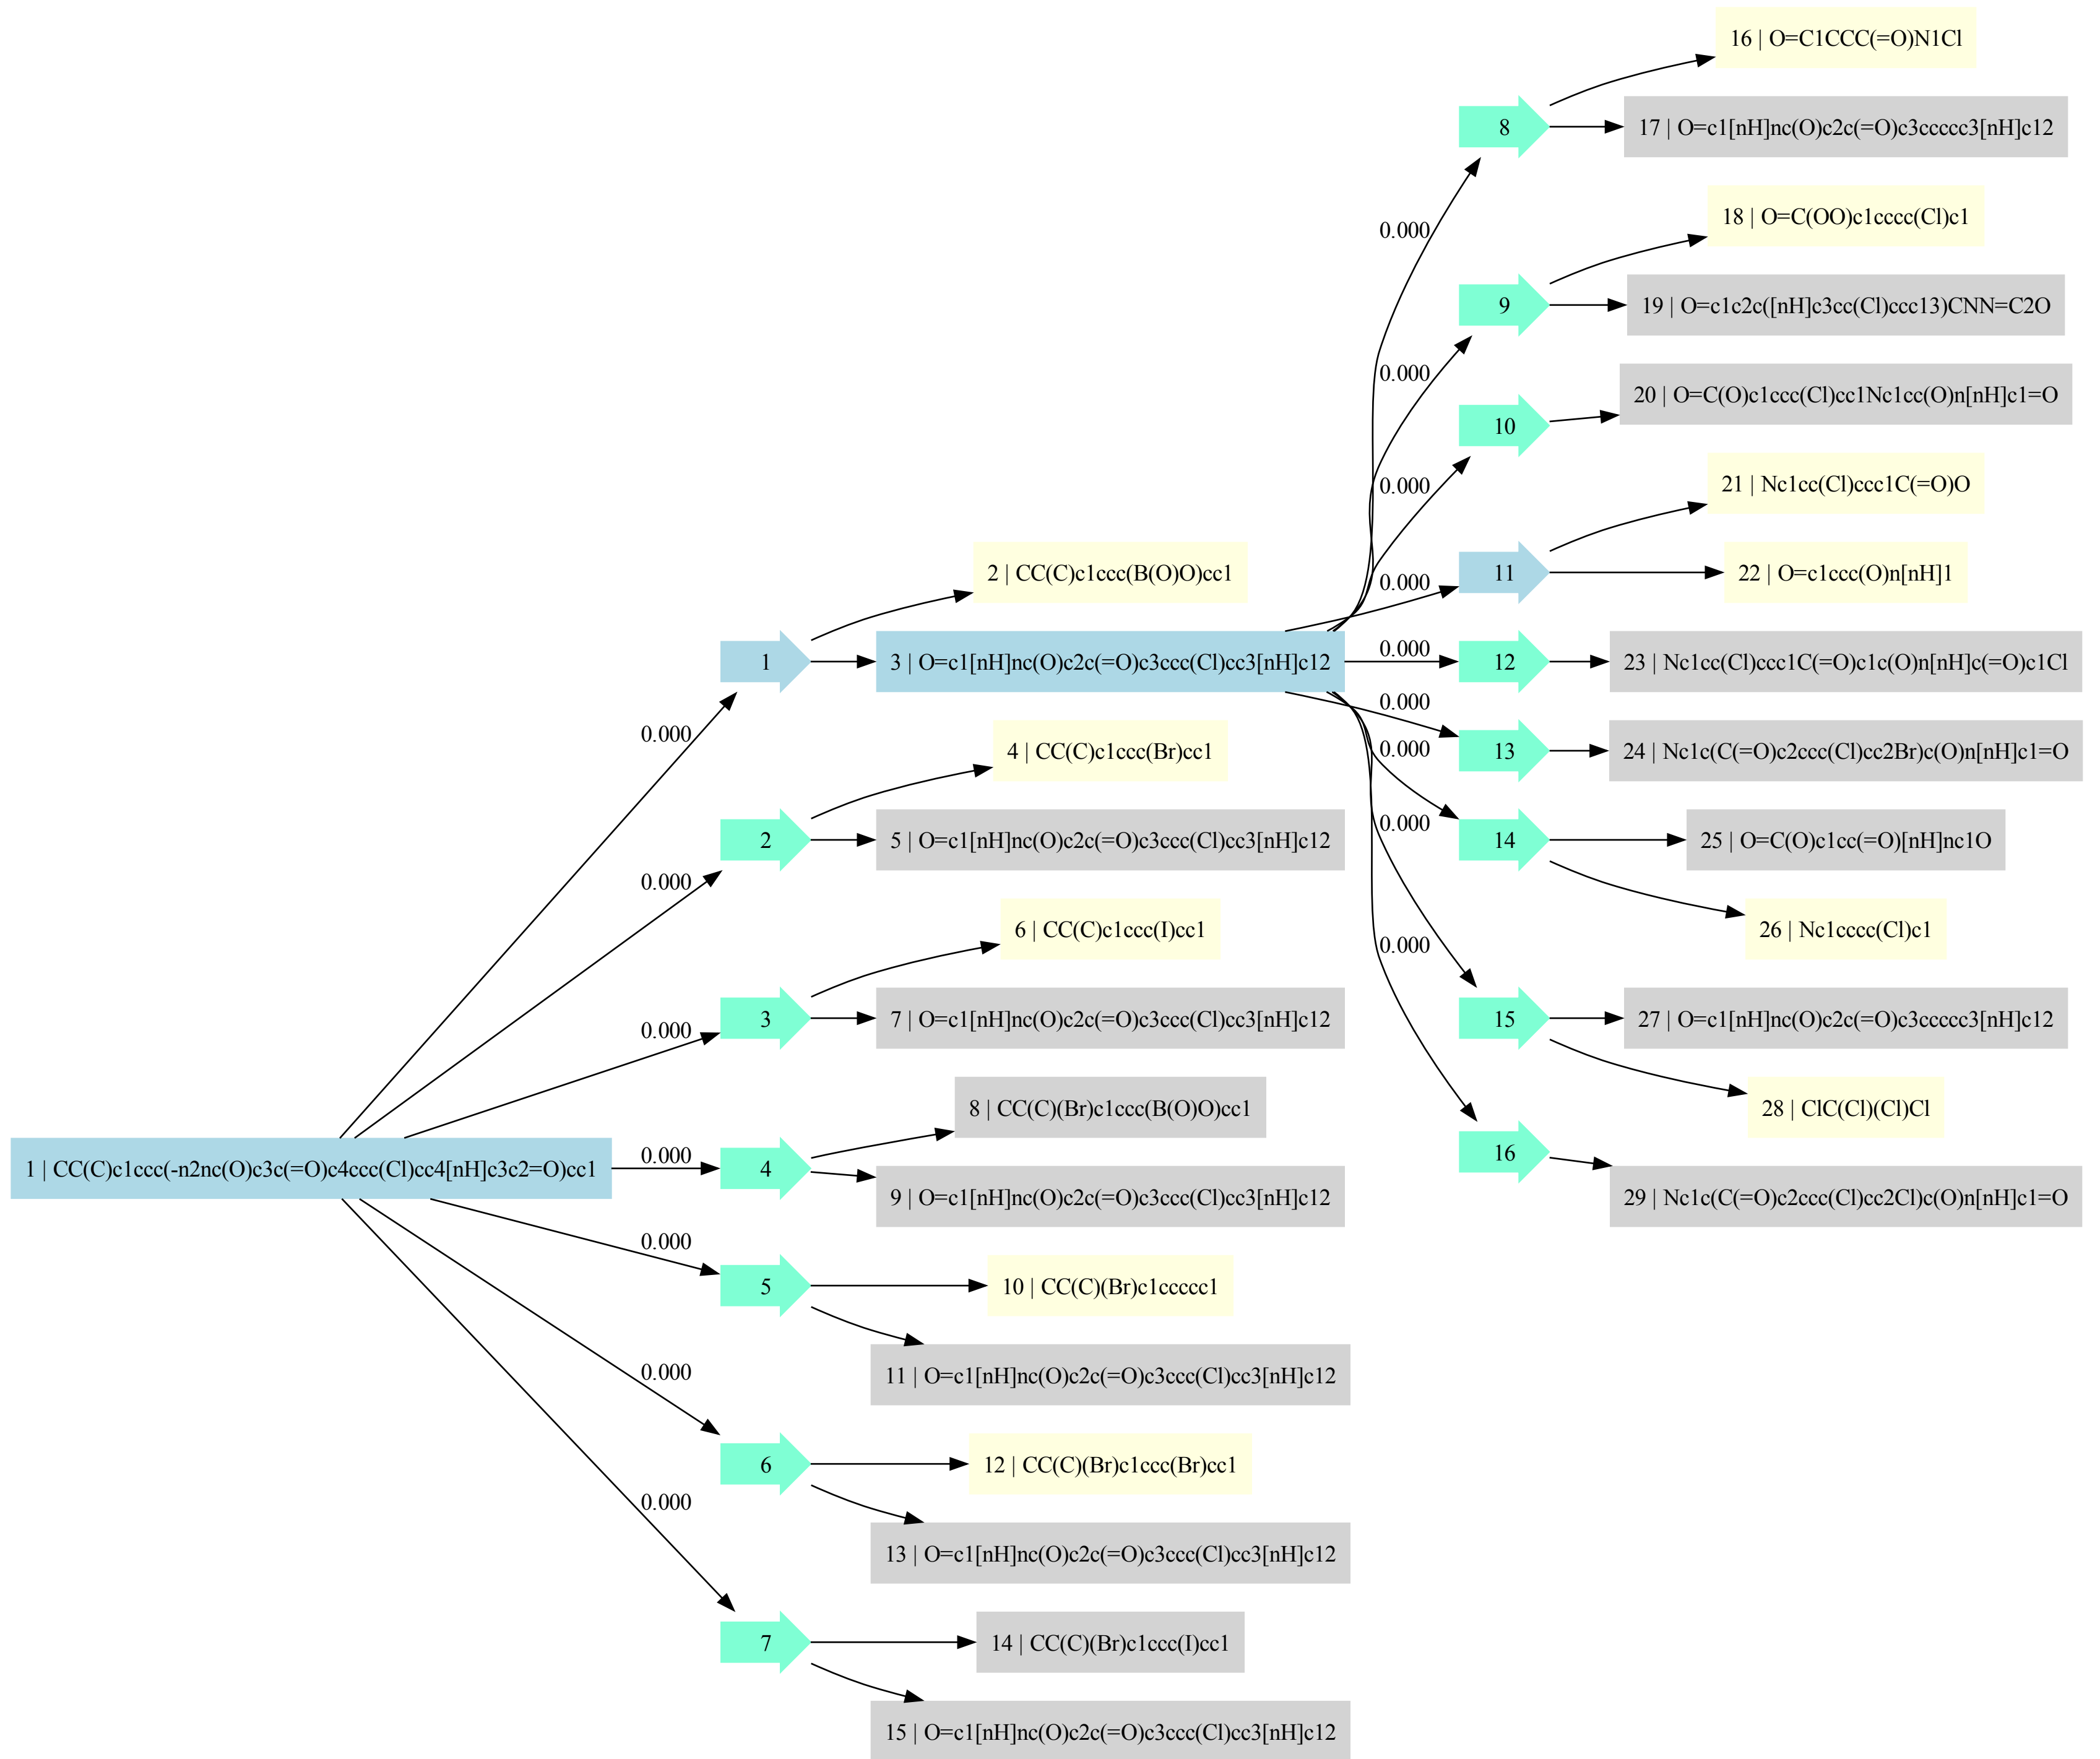

Supplement: supplementary_material [file mol_188_search_tree.pdf › materials9084/retro190_solutions/mol_188_search_tree.pdf]

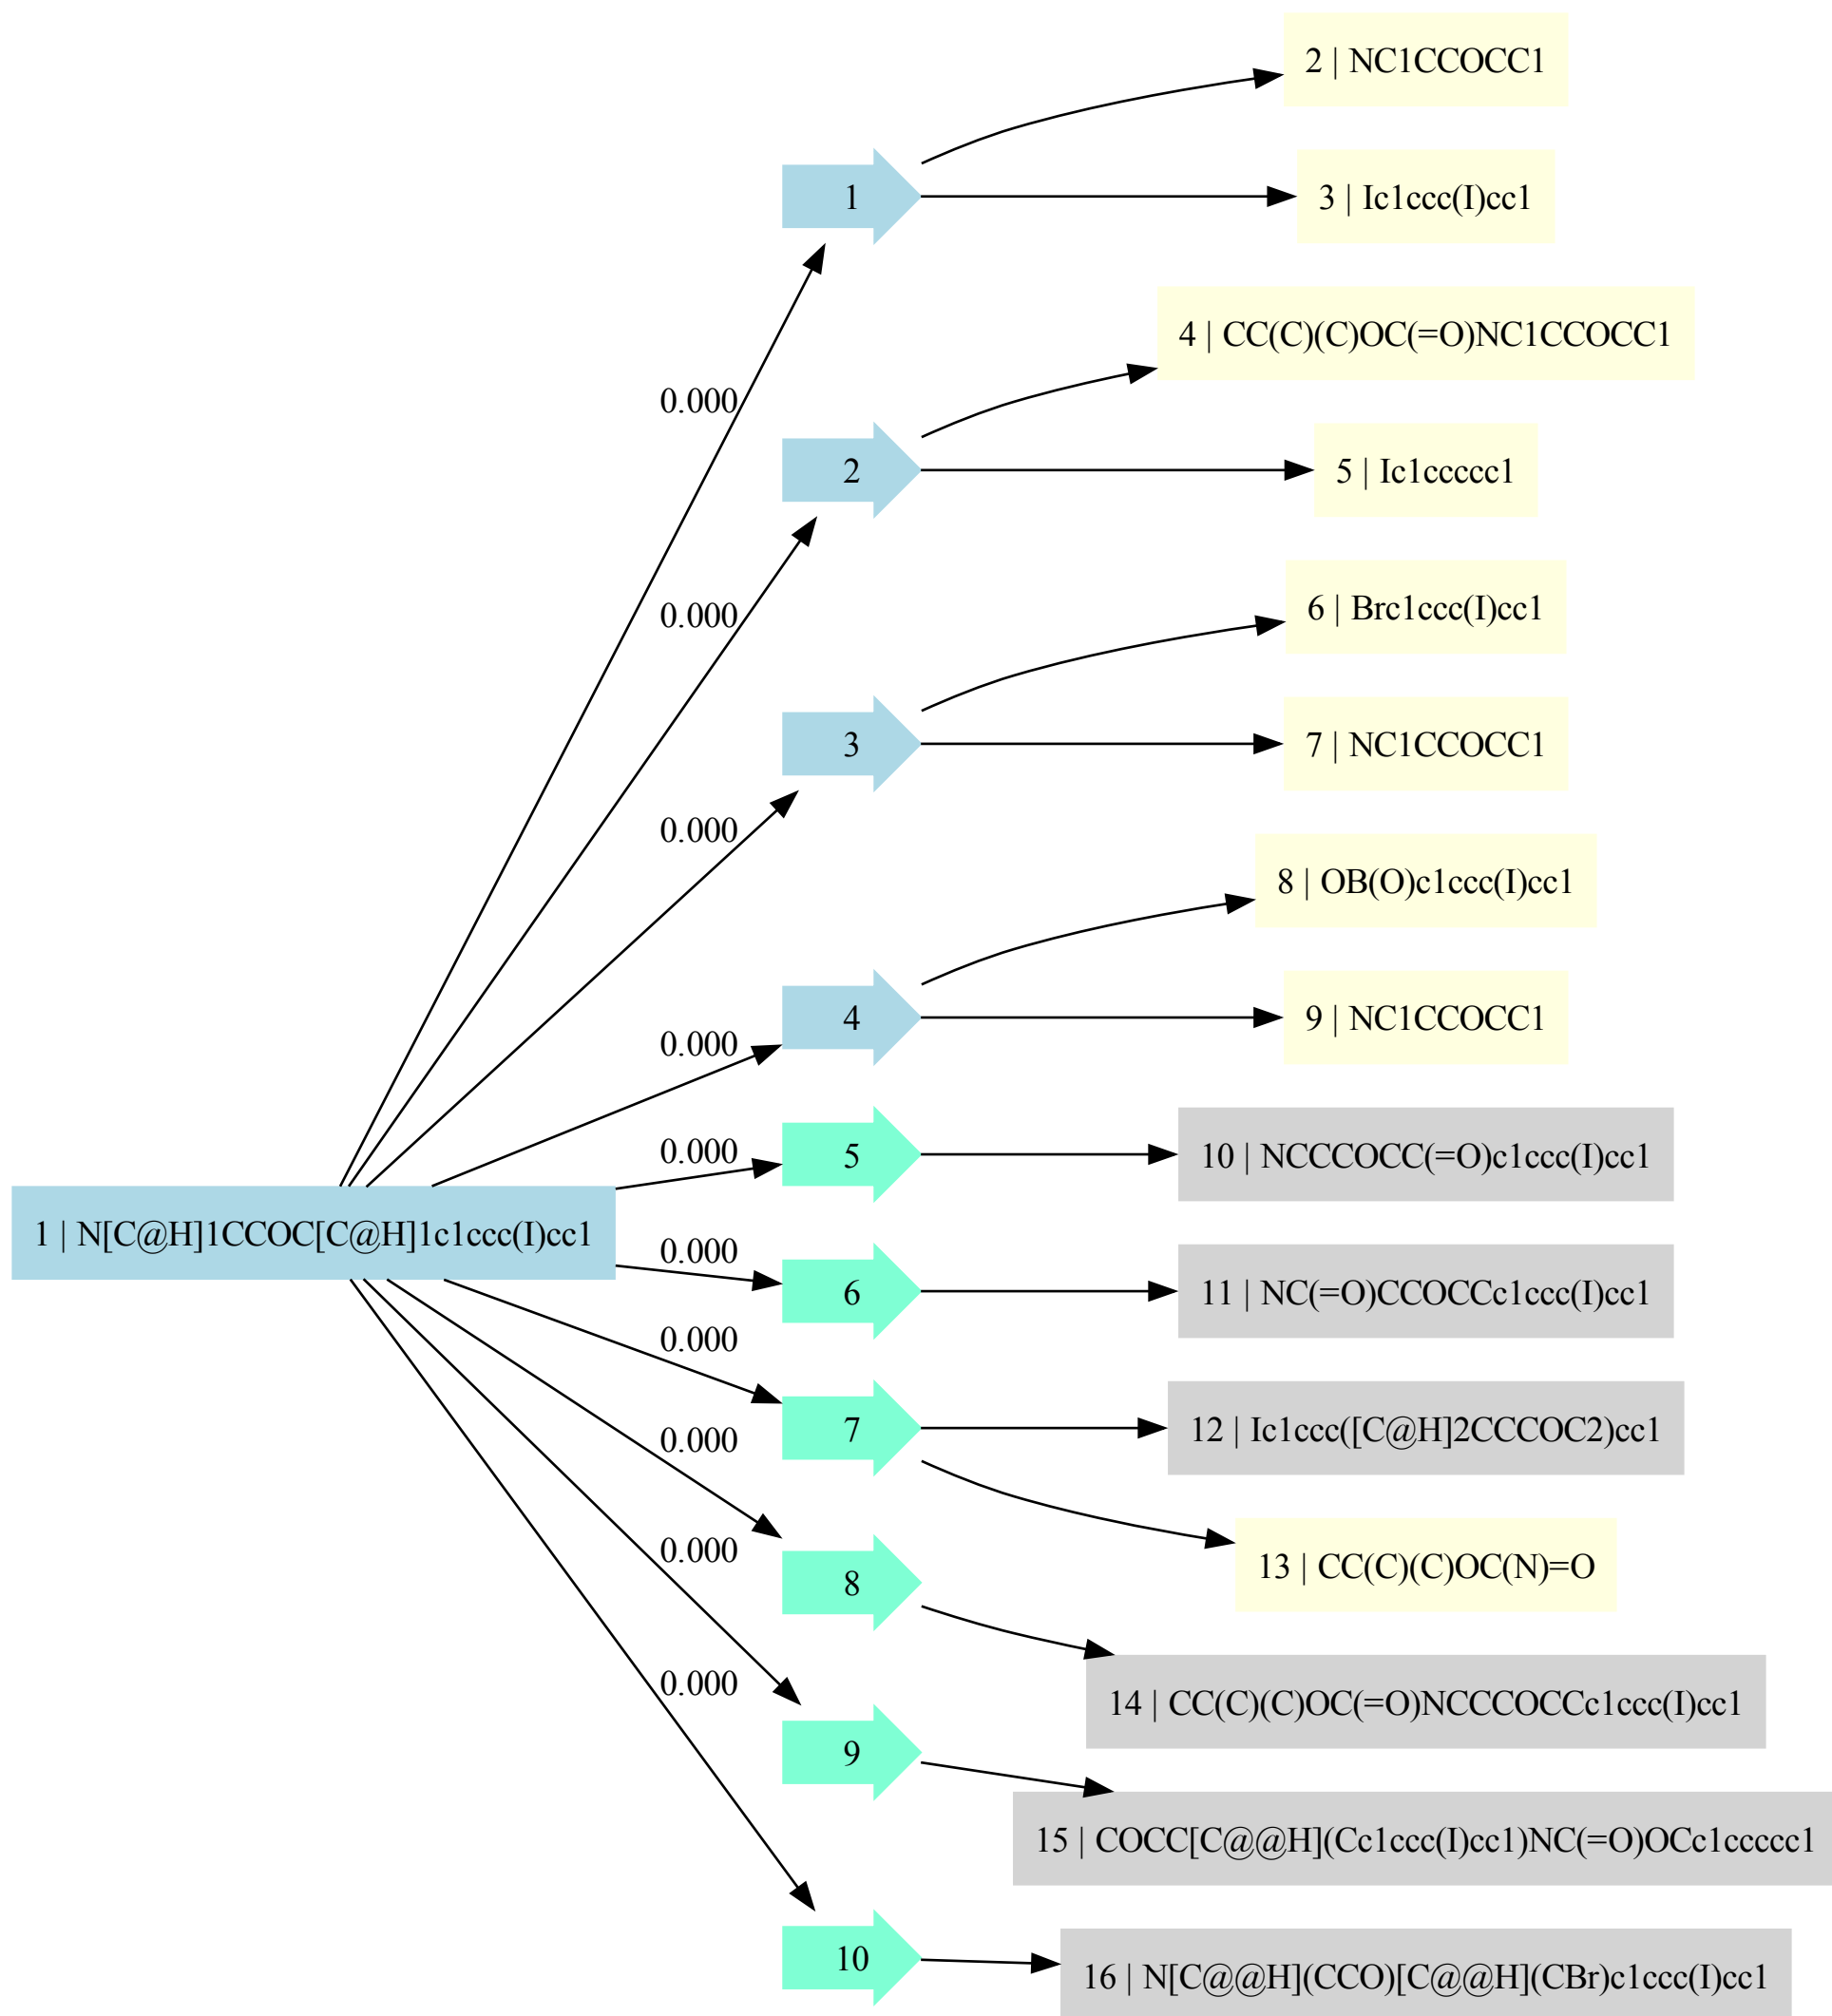

Supplement: supplementary_material [file mol_18_search_tree.pdf › materials9084/retro190_solutions/mol_18_search_tree.pdf]

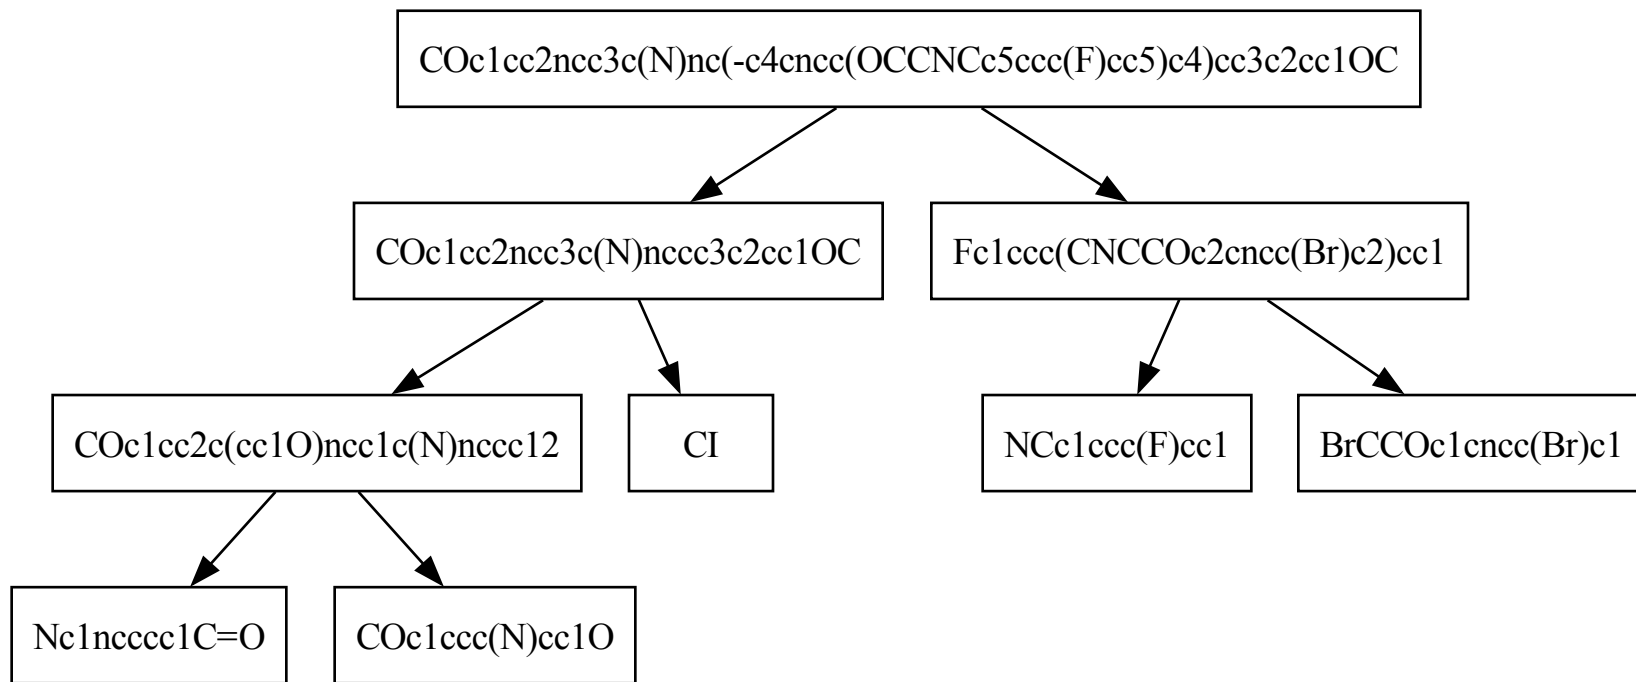

Supplement: supplementary_material [file mol_19_route_optimal.pdf › materials9084/retro190_solutions/mol_19_route_optimal.pdf]

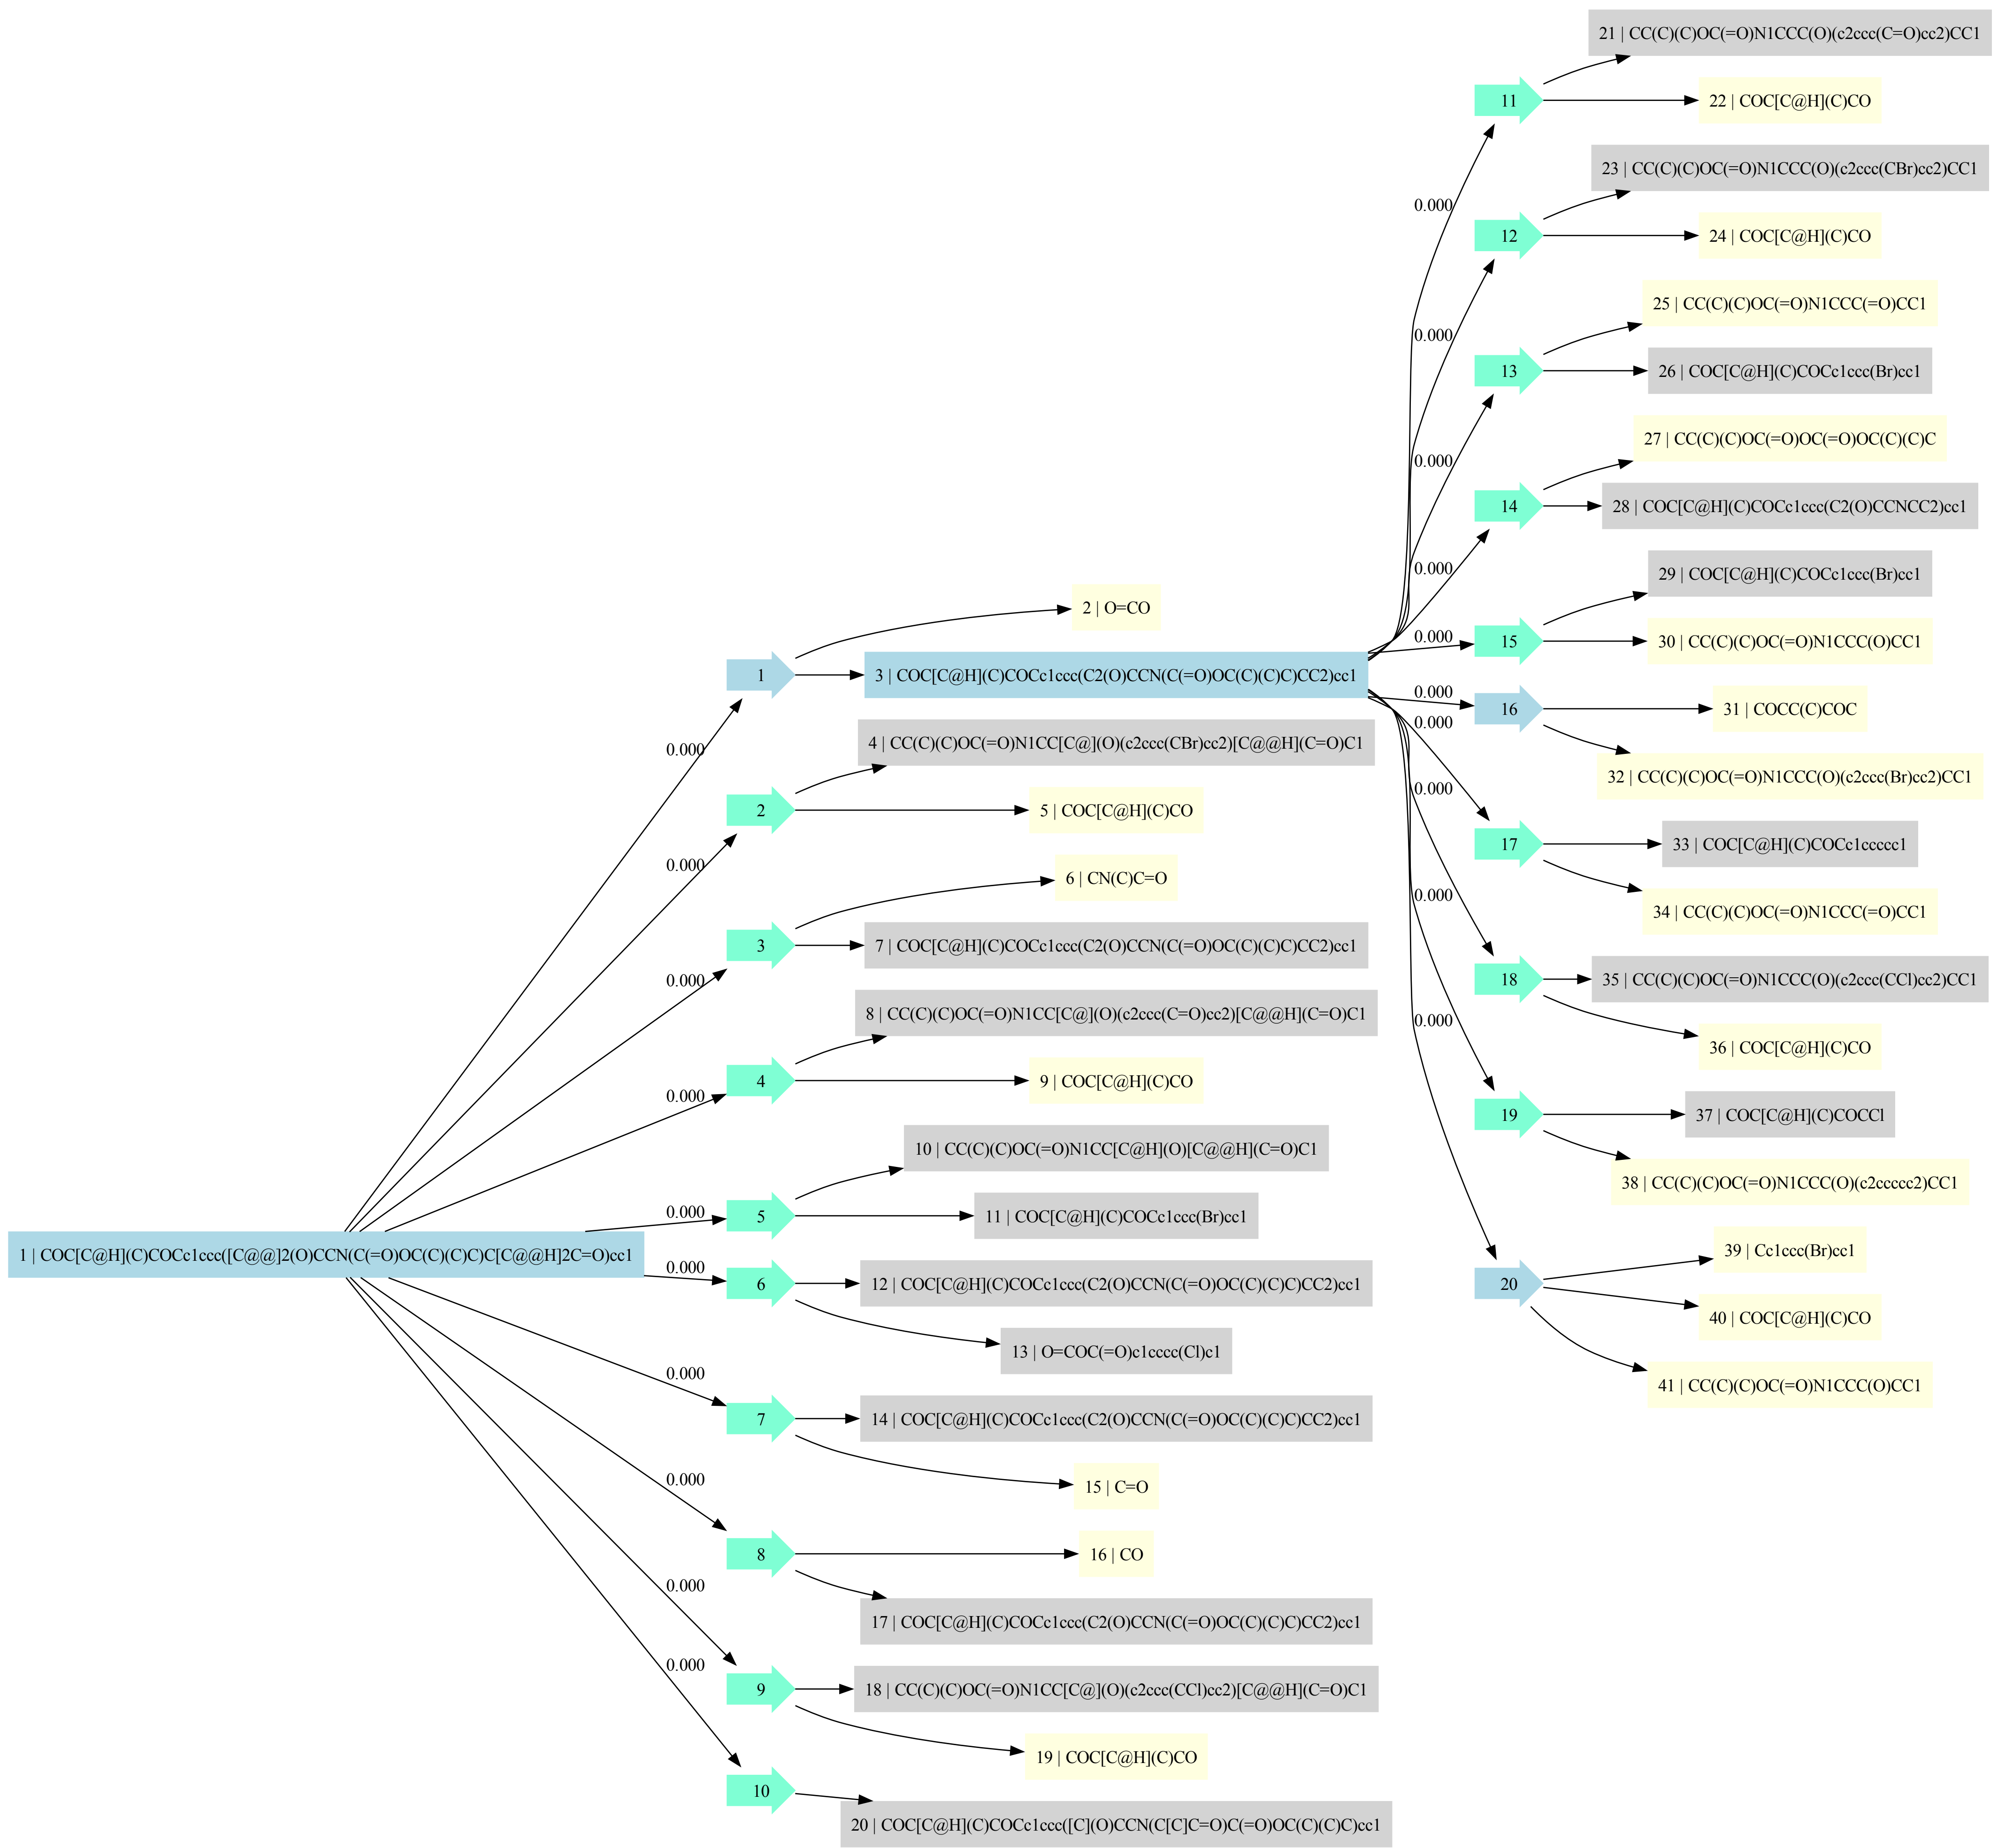

Supplement: supplementary_material [file mol_1_search_tree.pdf › materials9084/retro190_solutions/mol_1_search_tree.pdf]

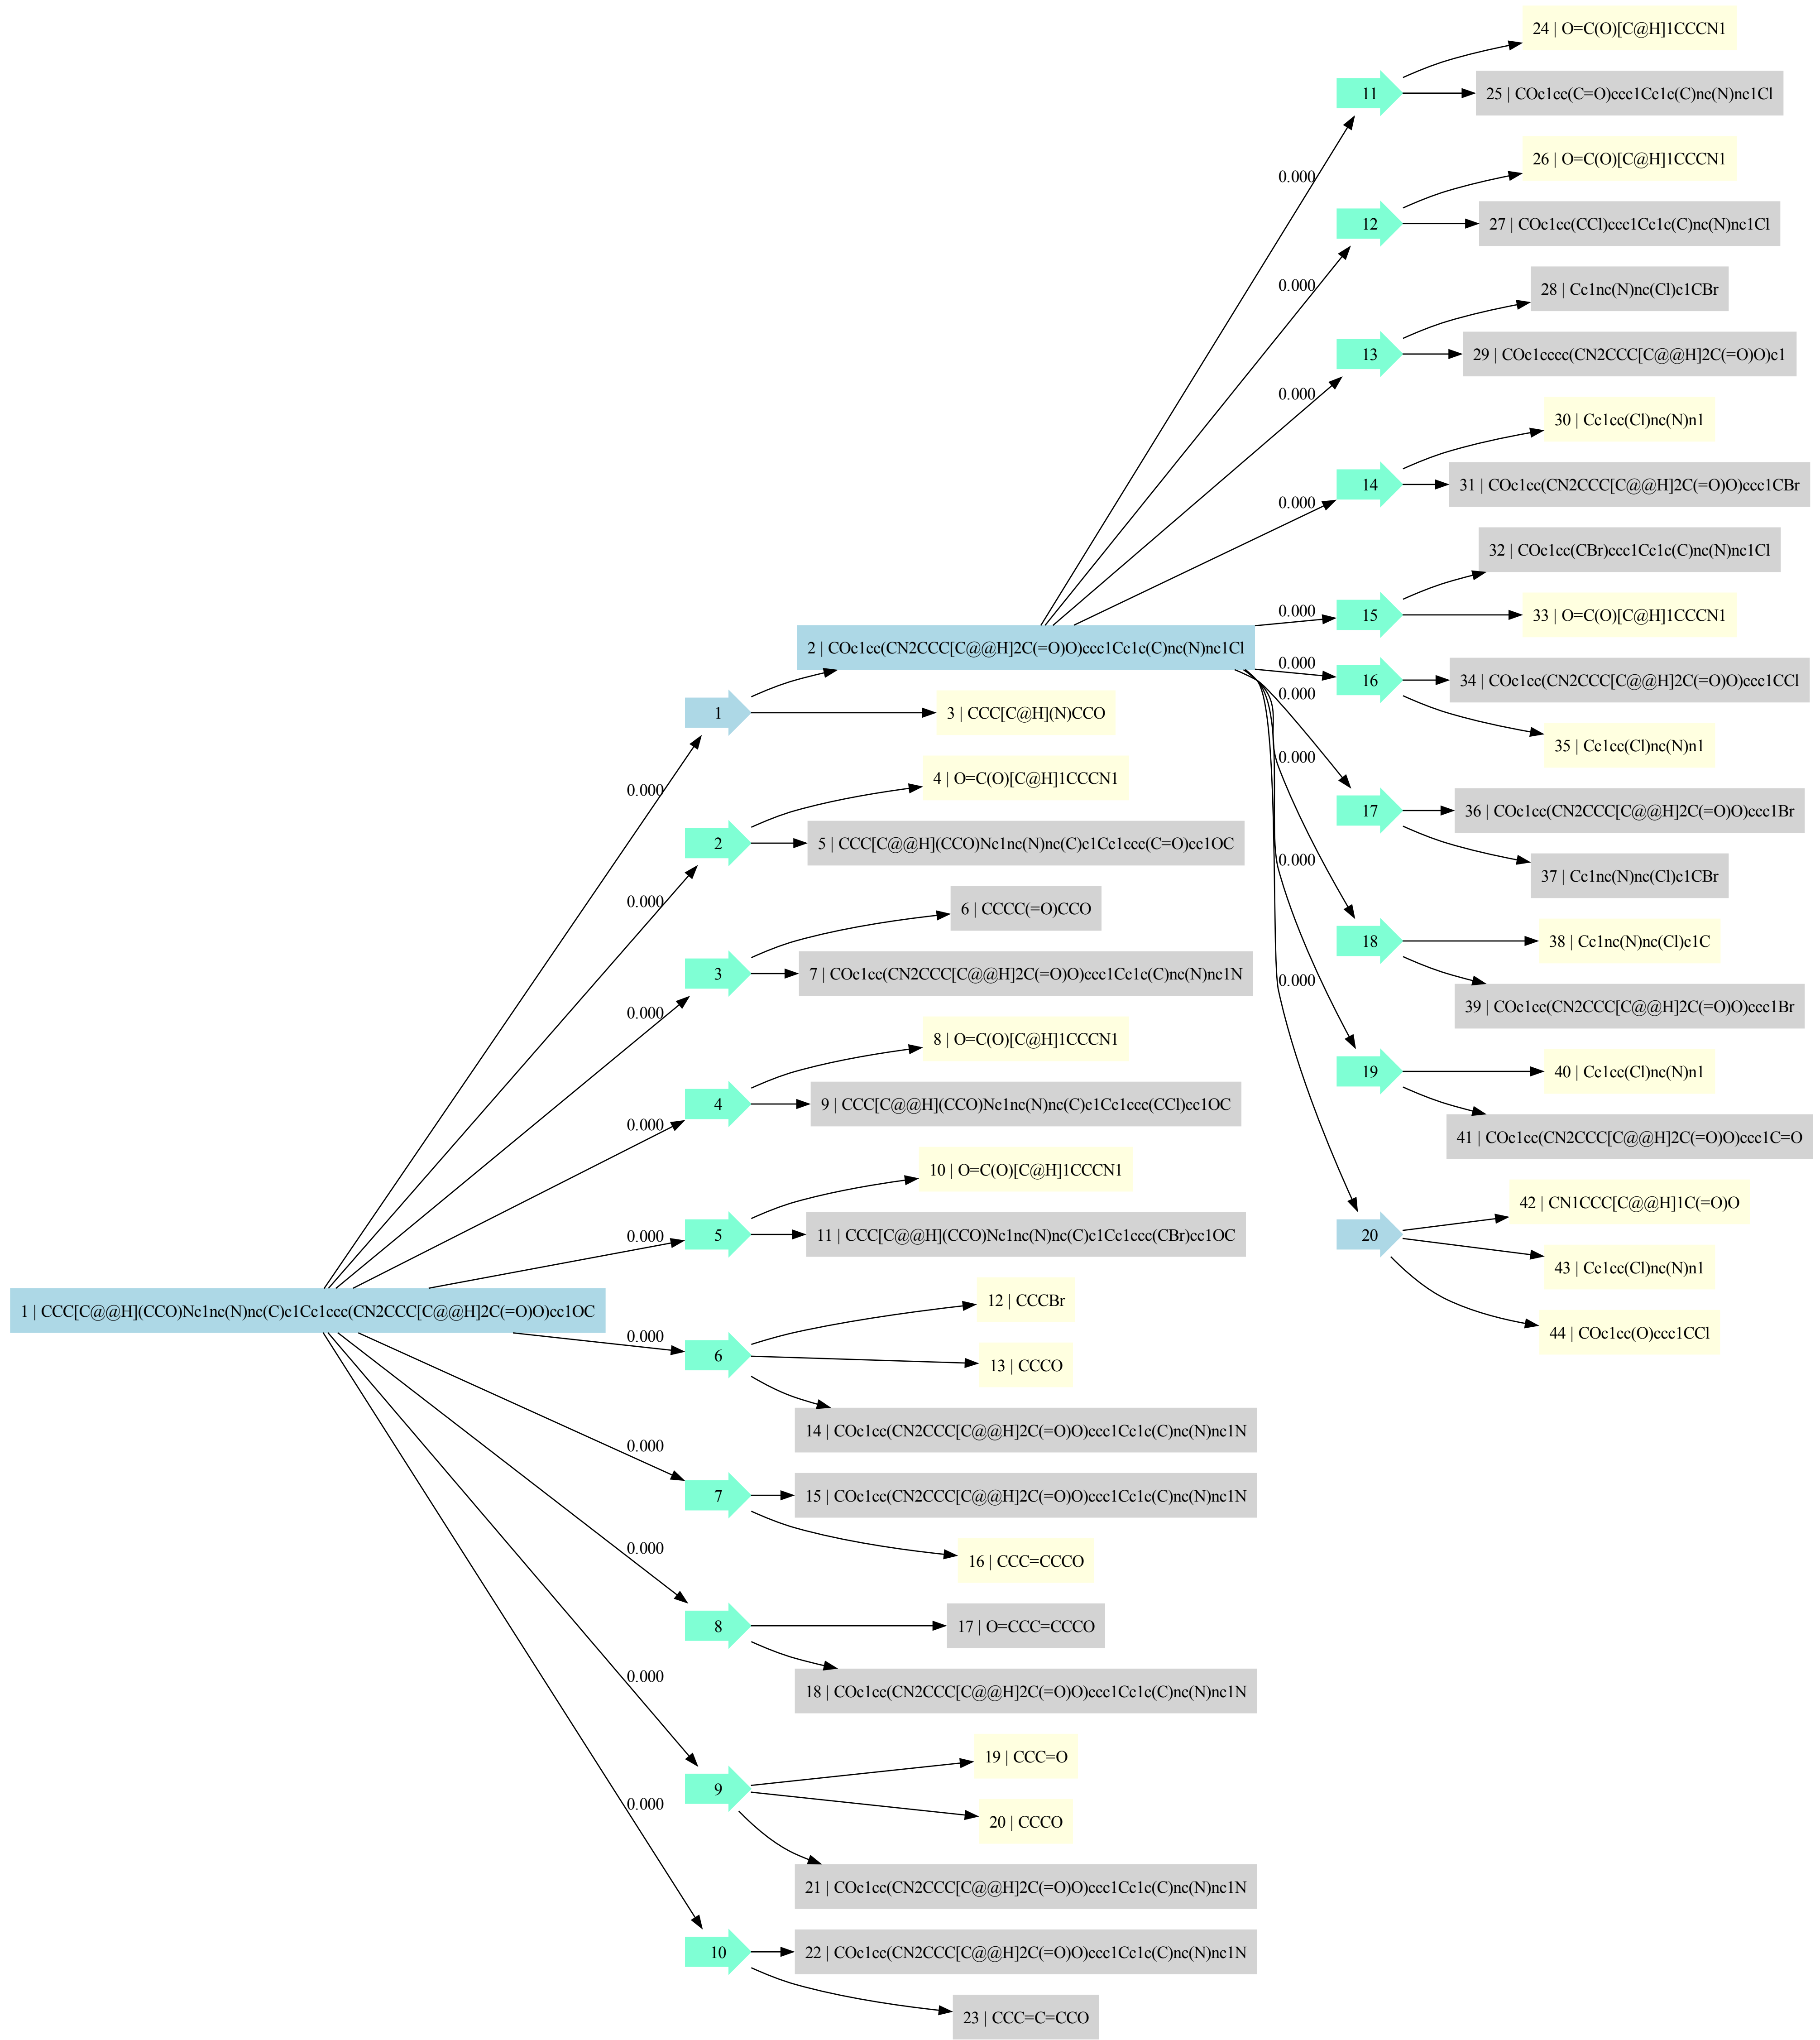

Supplement: supplementary_material [file mol_20_search_tree.pdf › materials9084/retro190_solutions/mol_20_search_tree.pdf]

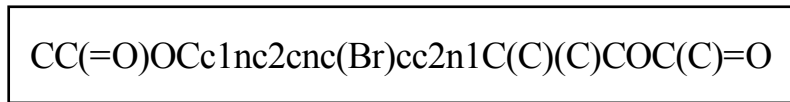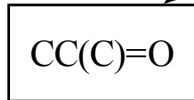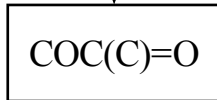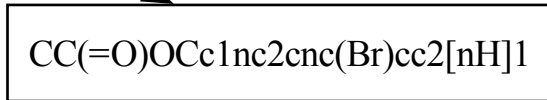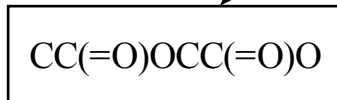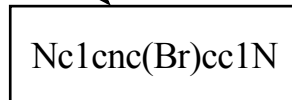

Supplement: supplementary_material [file mol_22_route_optimal.pdf › materials9084/retro190_solutions/mol_22_route_optimal.pdf]

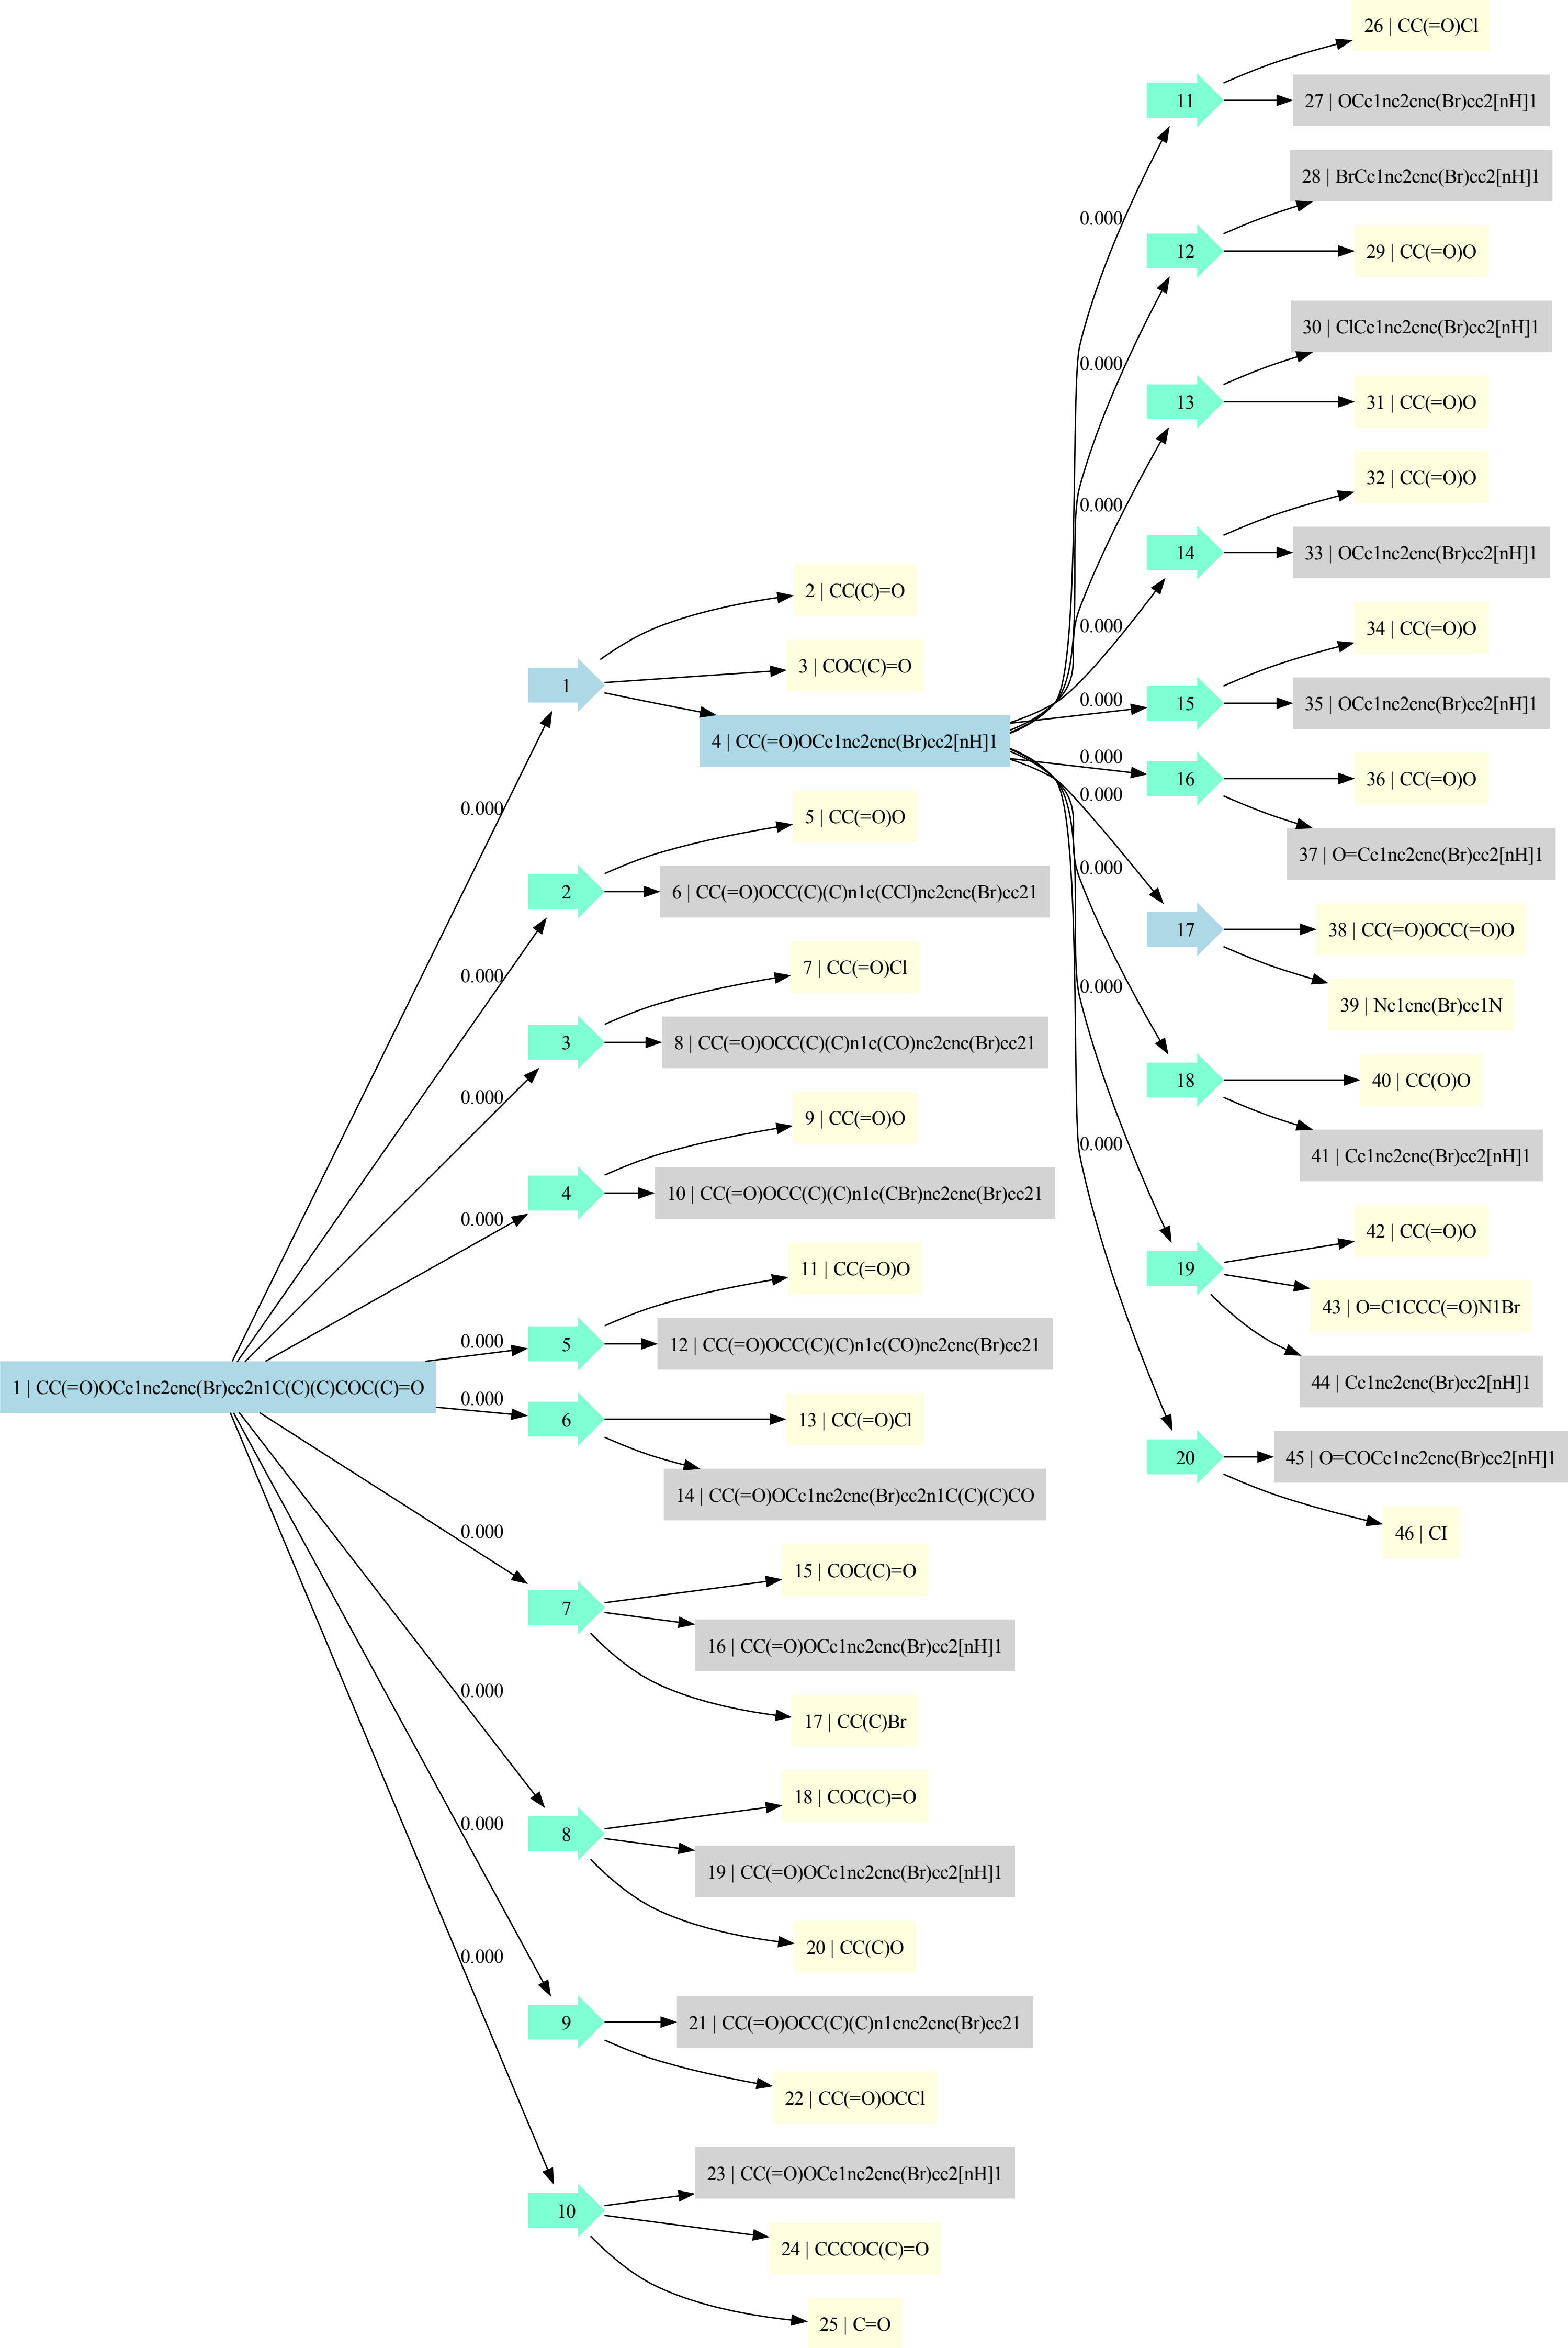

Supplement: supplementary_material [file mol_22_search_tree.pdf › materials9084/retro190_solutions/mol_22_search_tree.pdf]

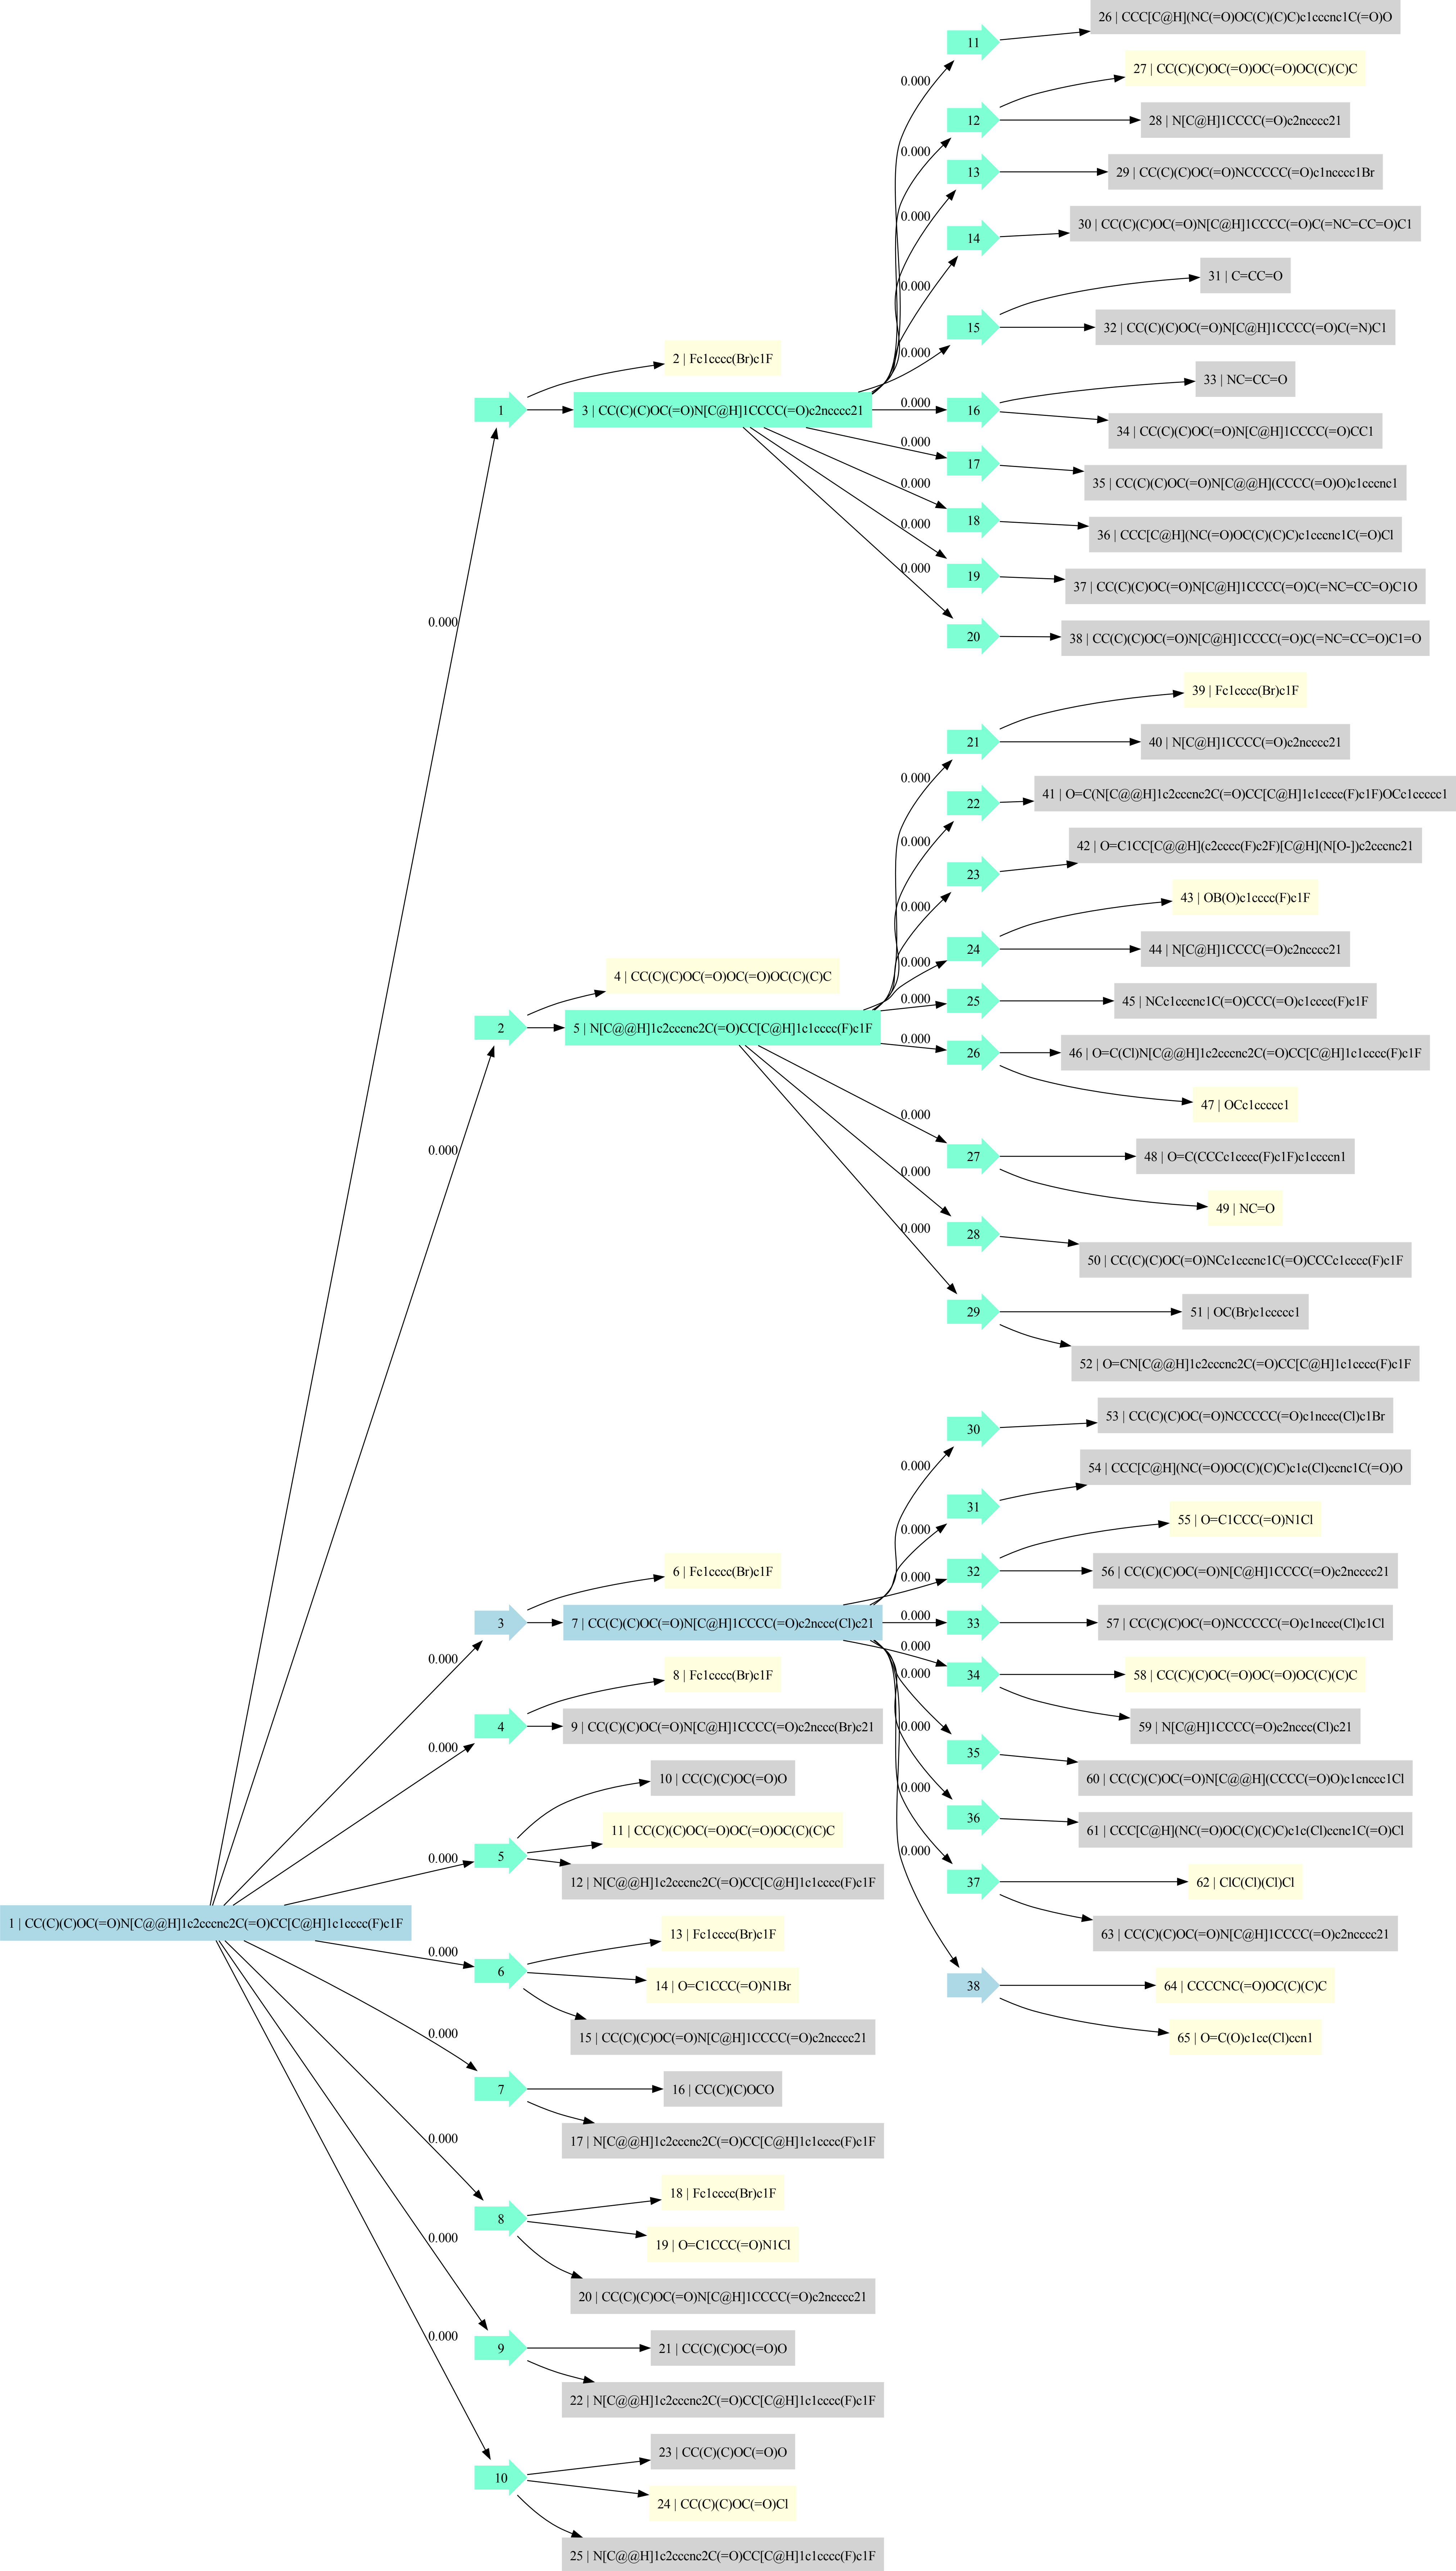

Supplement: supplementary_material [file mol_24_search_tree.pdf › materials9084/retro190_solutions/mol_24_search_tree.pdf]

C[C@@]1(O)[C@H](O)[C@@H](CO)O[C@H]1n1cc(-c2ccccc2)c2c(N)ncnc21



OB(O)c1ccccc1

C[C@@]1(O)[C@H](O)[C@@H](CO)O[C@H]1n1ccc2c(N)ncnc21

Supplement: supplementary_material [file mol_25_route_optimal.pdf › materials9084/retro190_solutions/mol_25_route_optimal.pdf]

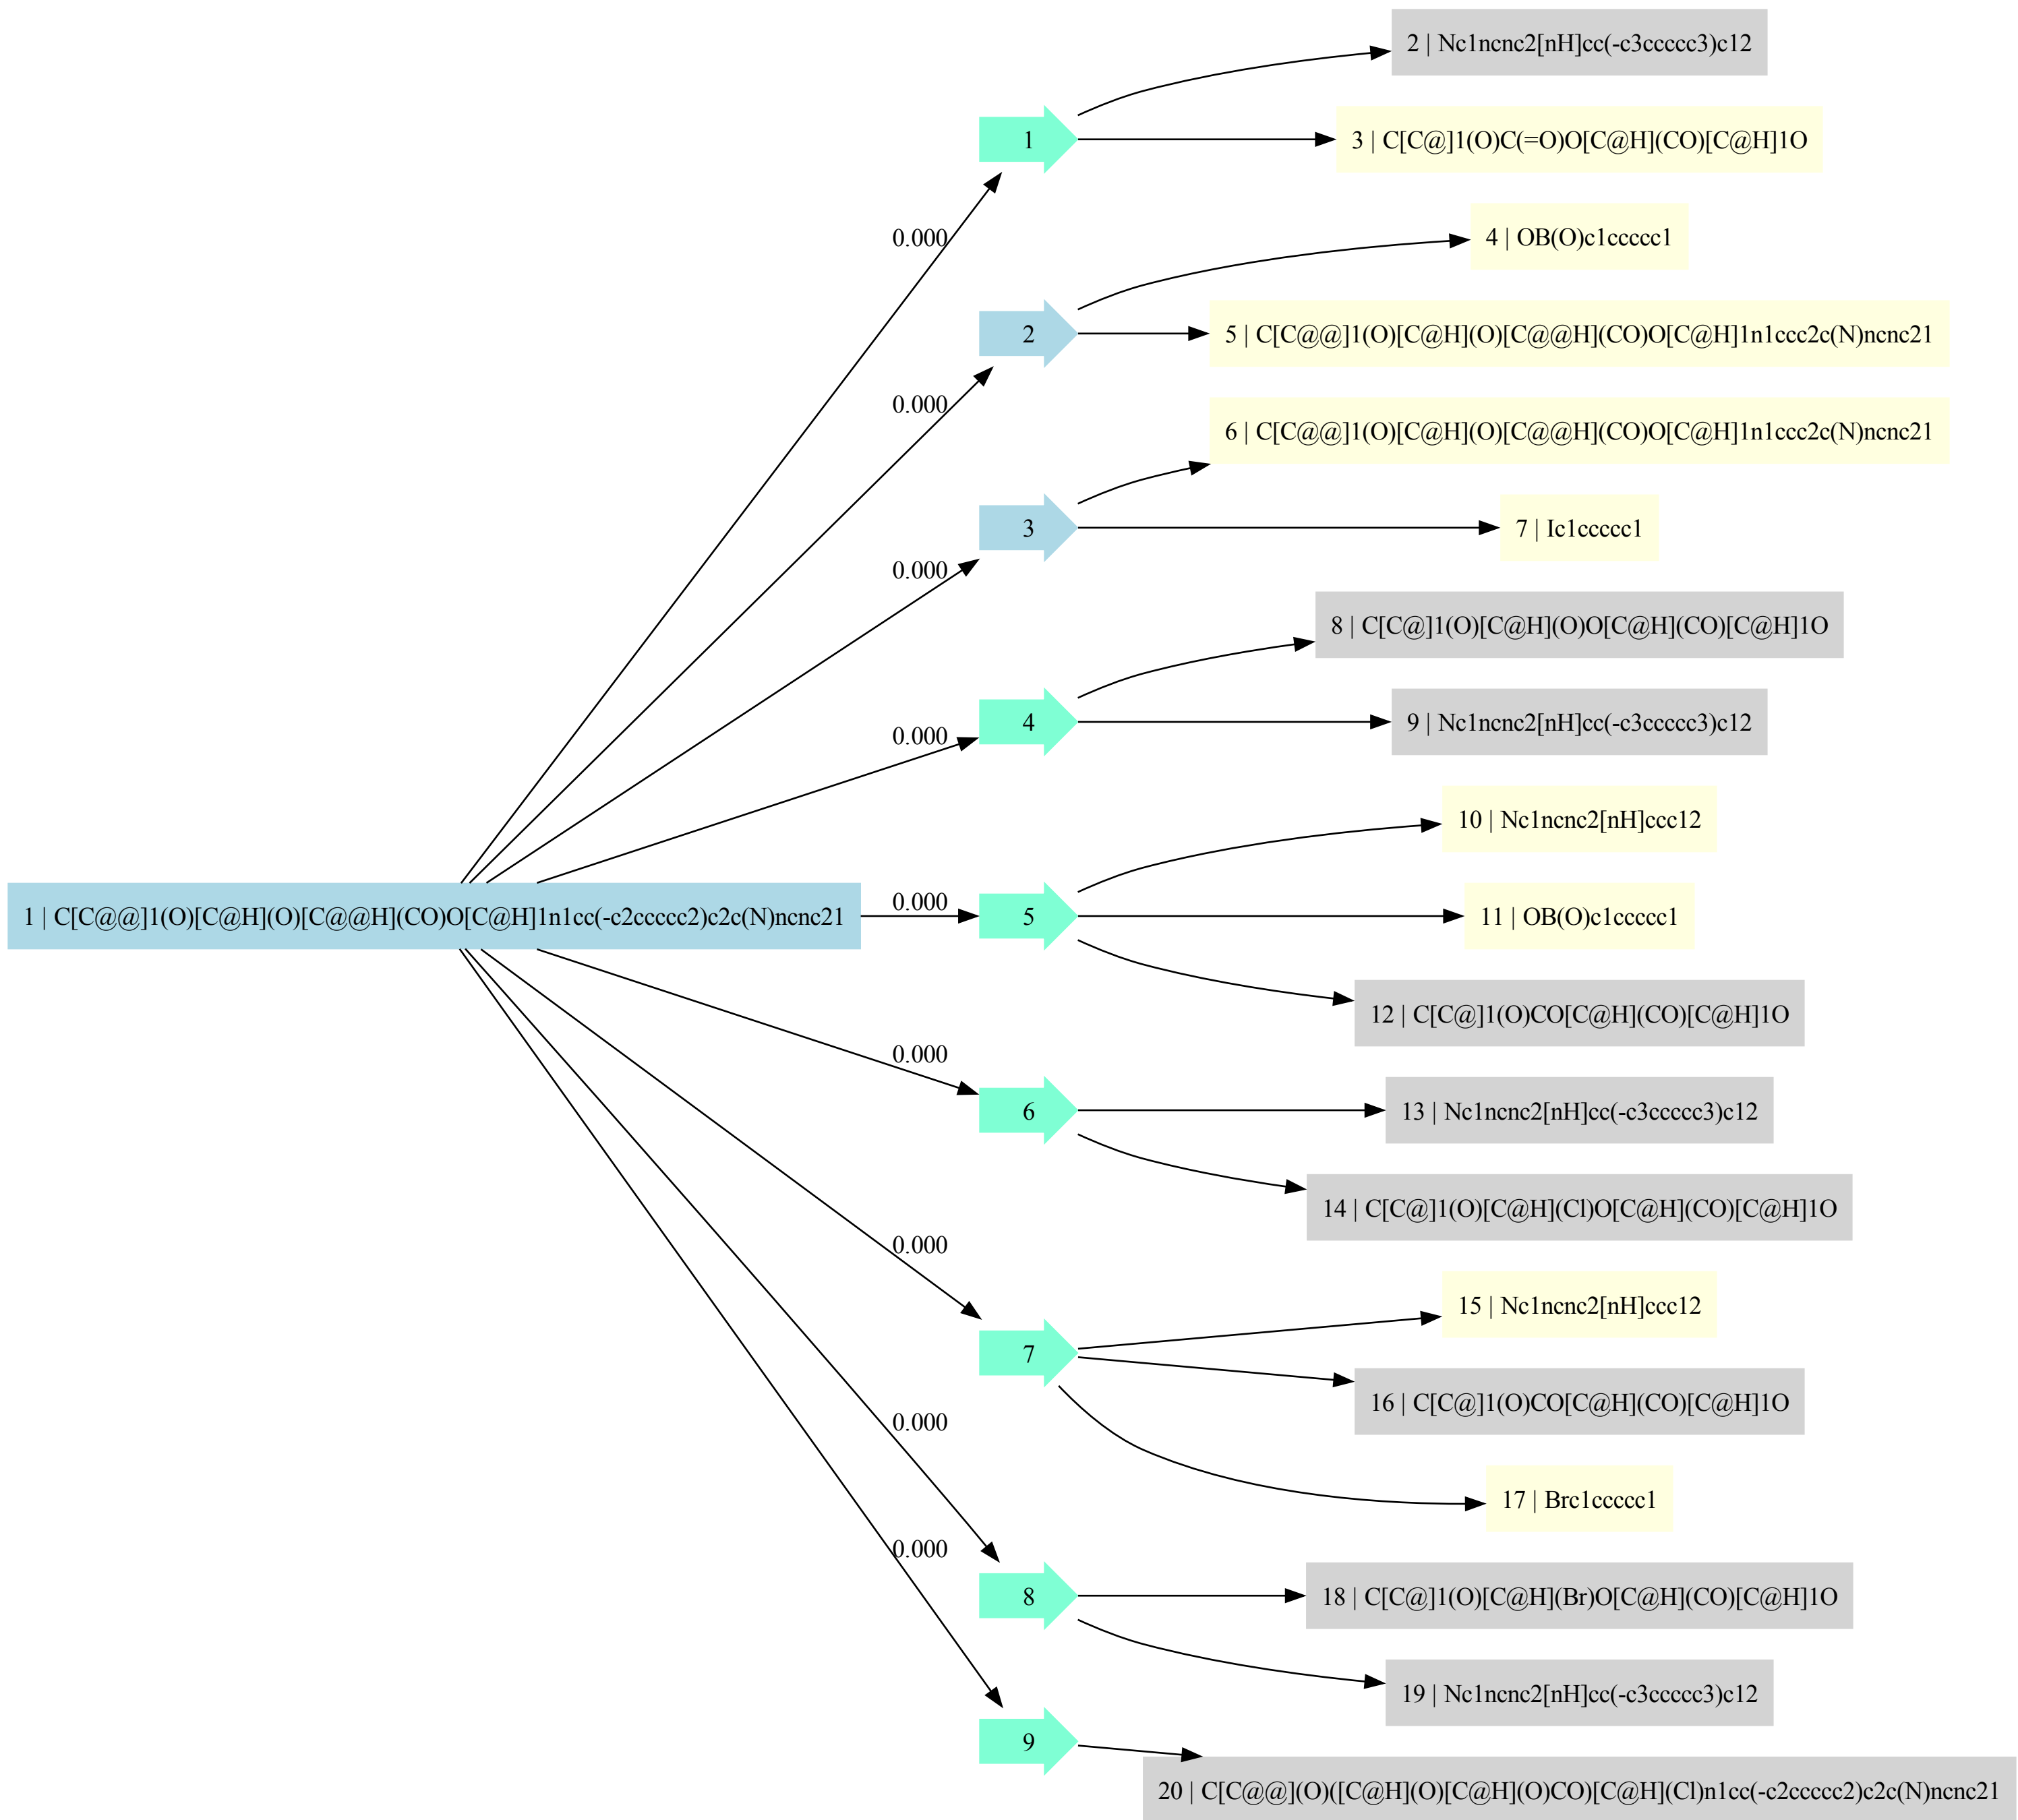

Supplement: supplementary_material [file mol_25_search_tree.pdf › materials9084/retro190_solutions/mol_25_search_tree.pdf]

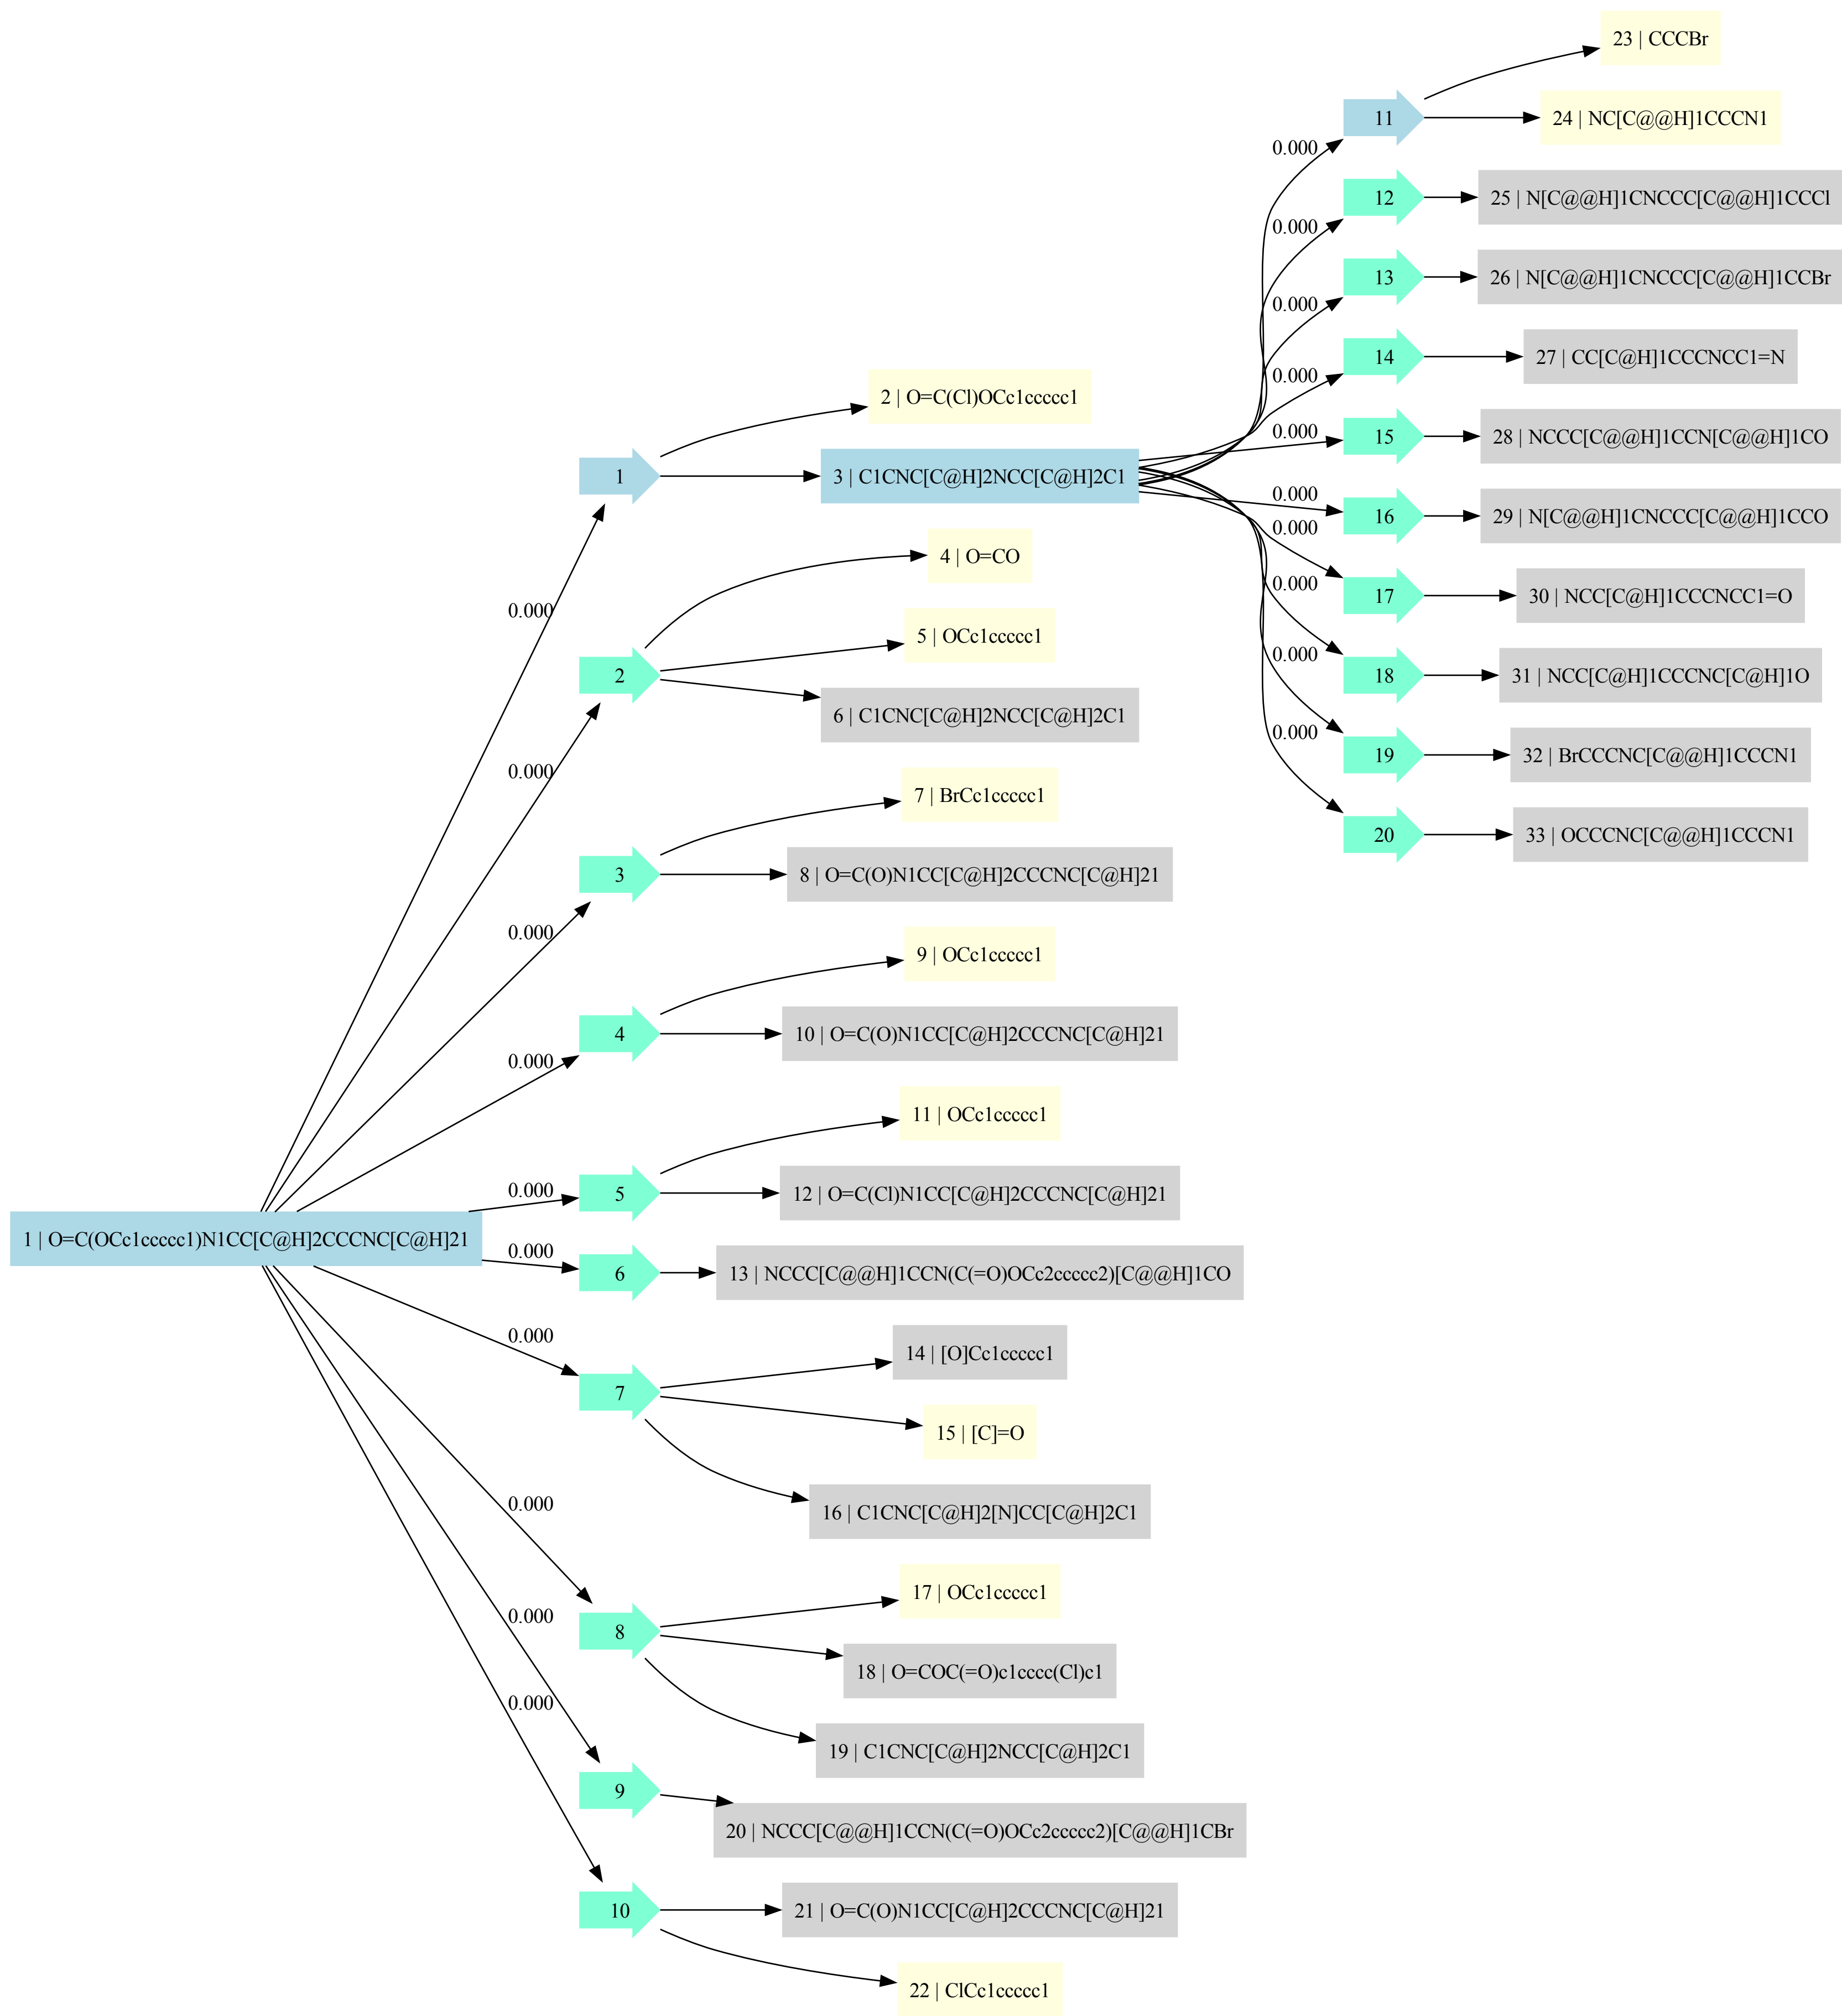

Supplement: supplementary_material [file mol_26_search_tree.pdf › materials9084/retro190_solutions/mol_26_search_tree.pdf]

O=C(Nc1ccc(-c2cnc(C34CC5CC(CC(C(=O)O)(C5)C3)C4)s2)cc1)Nc1ccccc1F



Nc1ccc(-c2cnsc2)cc1

O=C(O)C12CC3CC(CC(C3)C1)C2

O=C=Nc1ccccc1F

Supplement: supplementary_material [file mol_27_route_optimal.pdf › materials9084/retro190_solutions/mol_27_route_optimal.pdf]

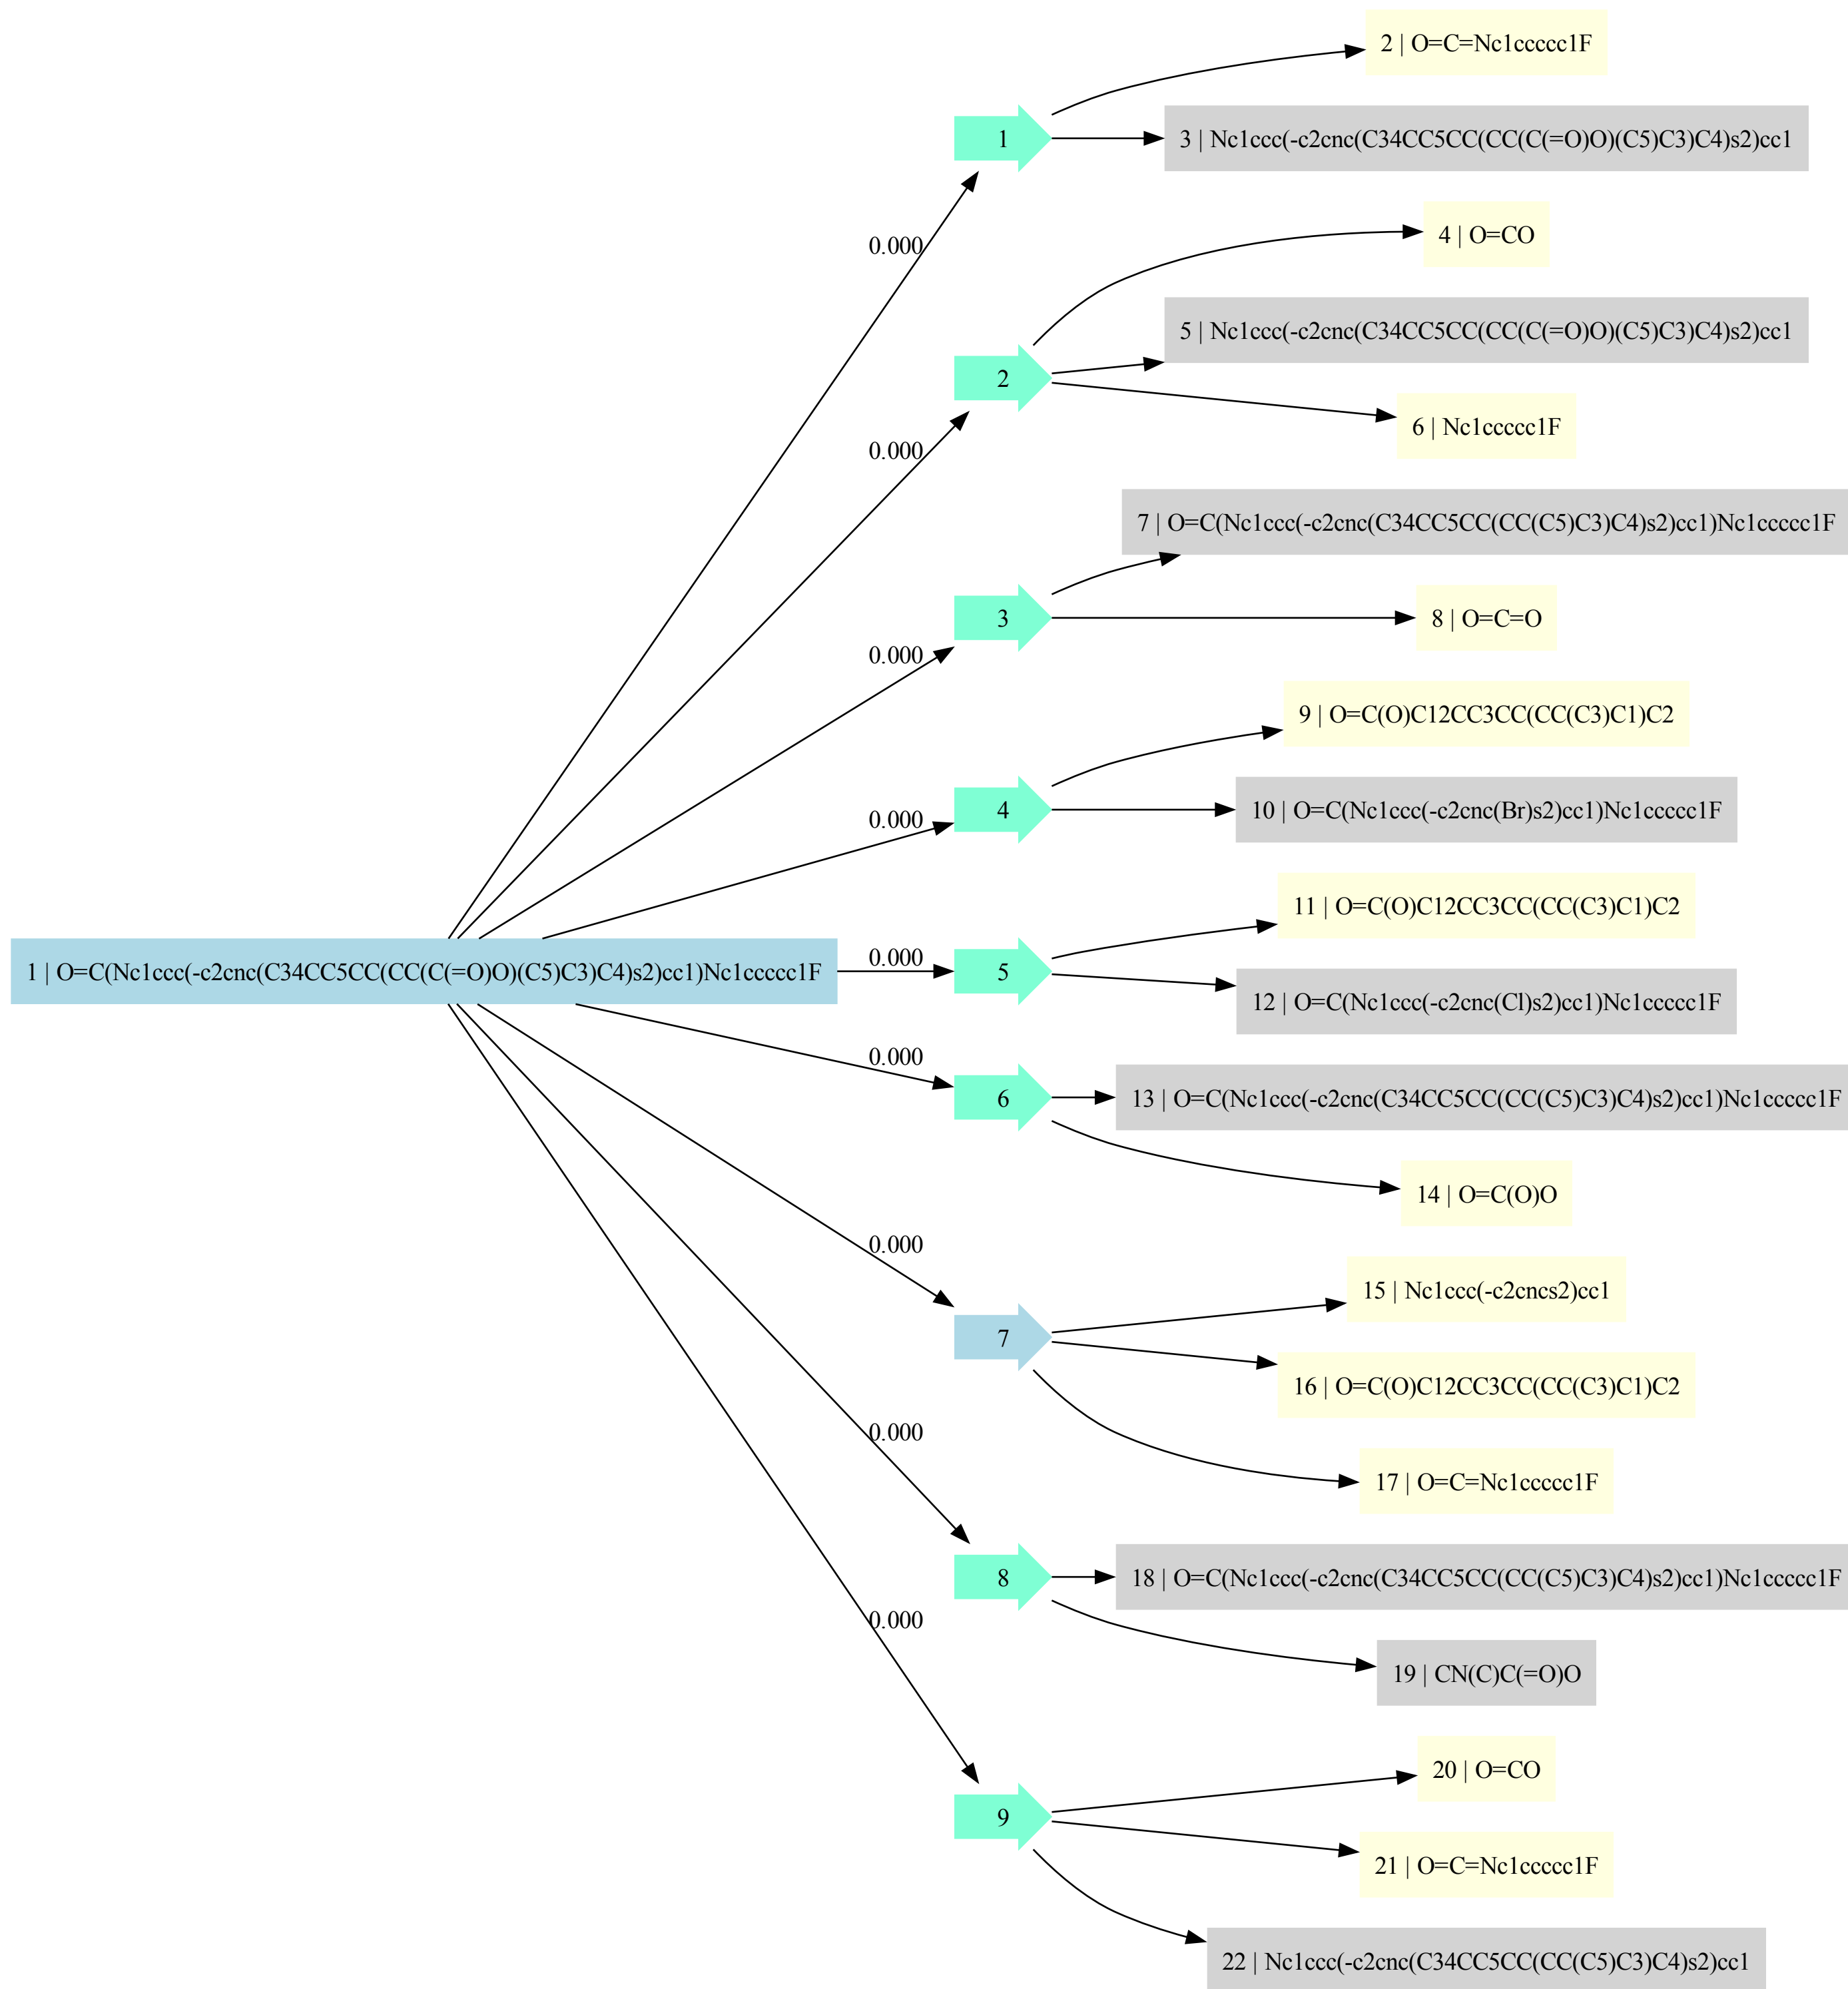

Supplement: supplementary_material [file mol_27_search_tree.pdf › materials9084/retro190_solutions/mol_27_search_tree.pdf]

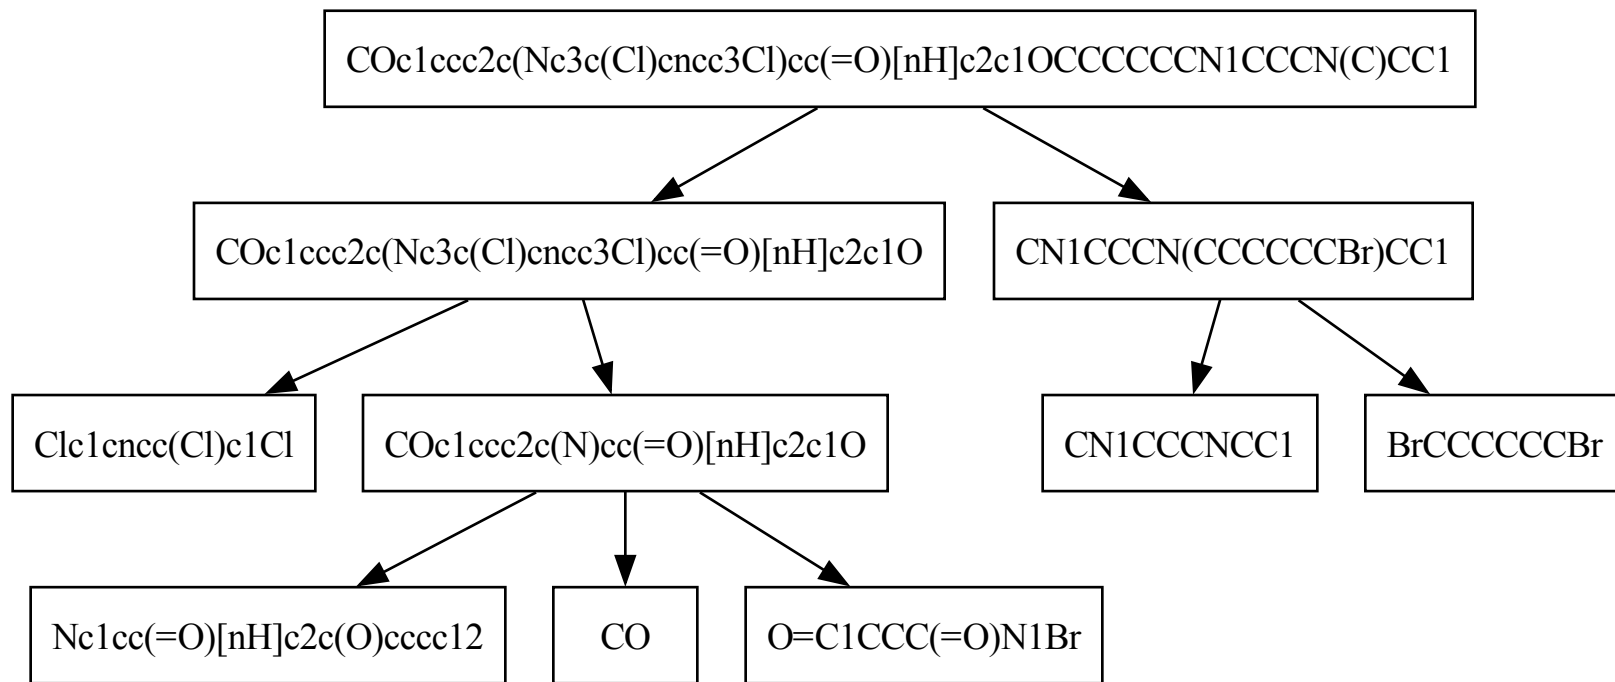

Supplement: supplementary_material [file mol_28_route_optimal.pdf › materials9084/retro190_solutions/mol_28_route_optimal.pdf]

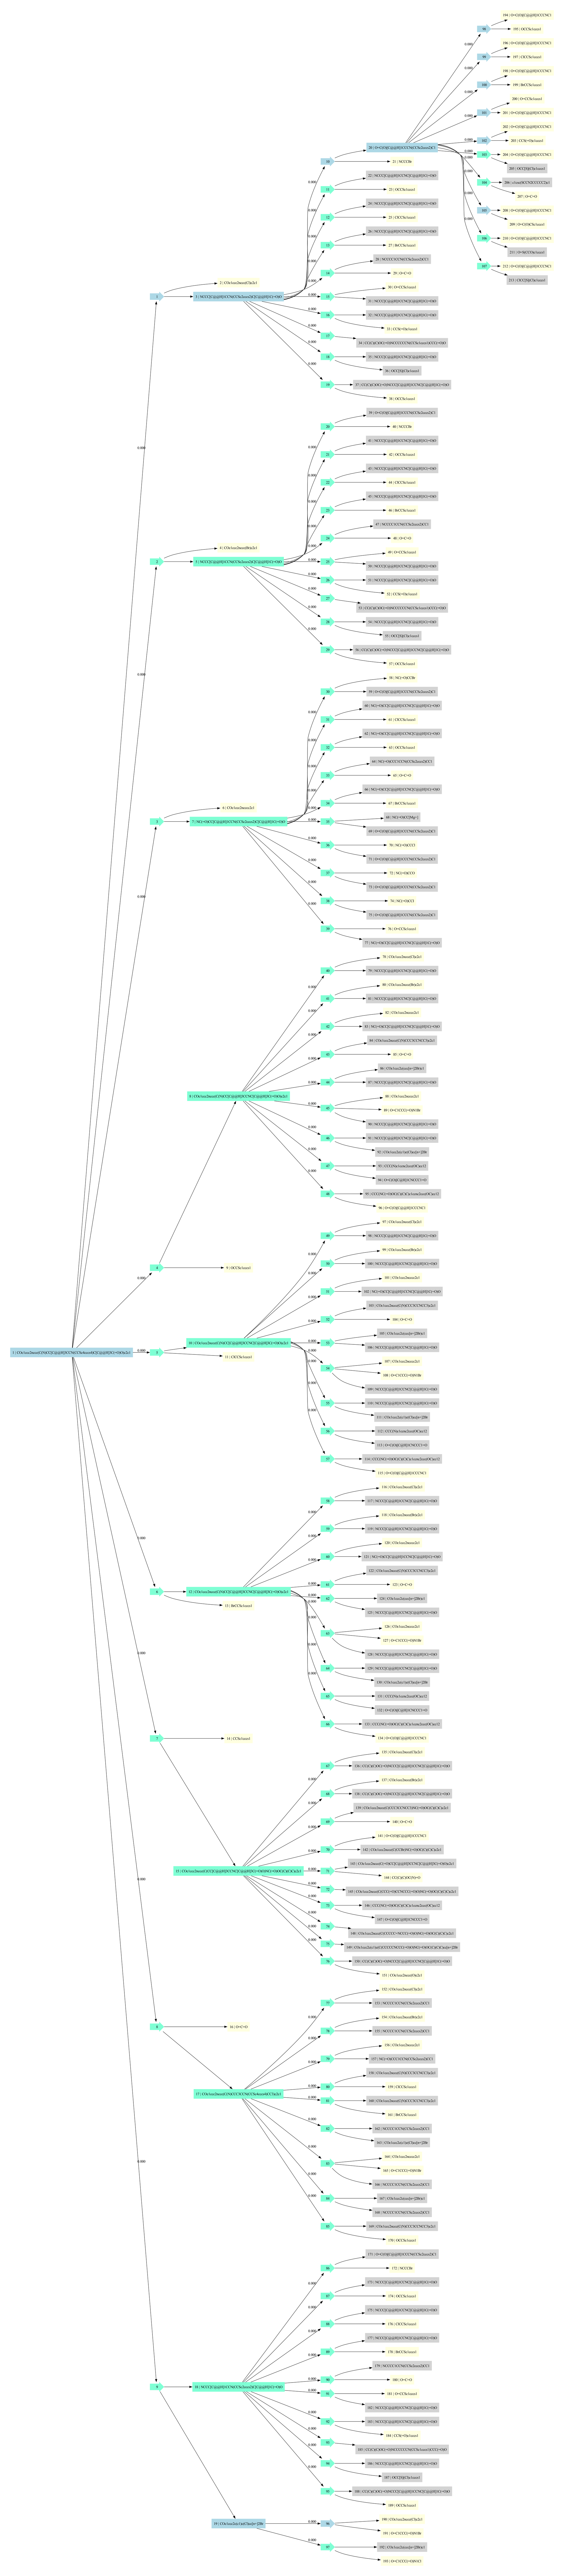

Supplement: supplementary_material [file mol_29_search_tree.pdf › materials9084/retro190_solutions/mol_29_search_tree.pdf]

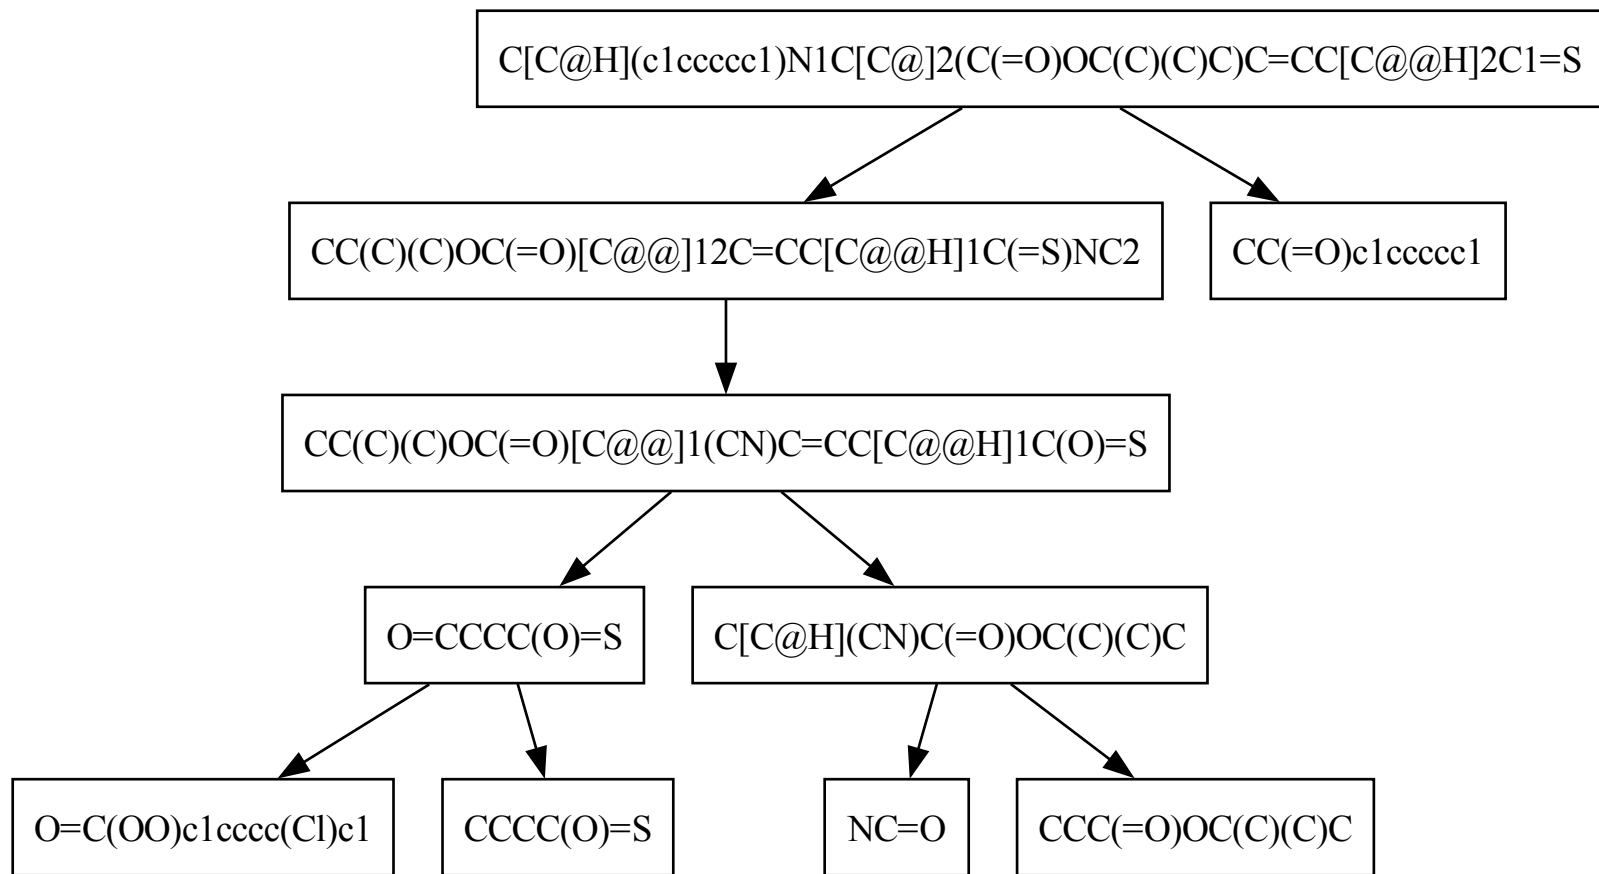

Supplement: supplementary_material [file mol_2_route_optimal.pdf › materials9084/retro190_solutions/mol_2_route_optimal.pdf]

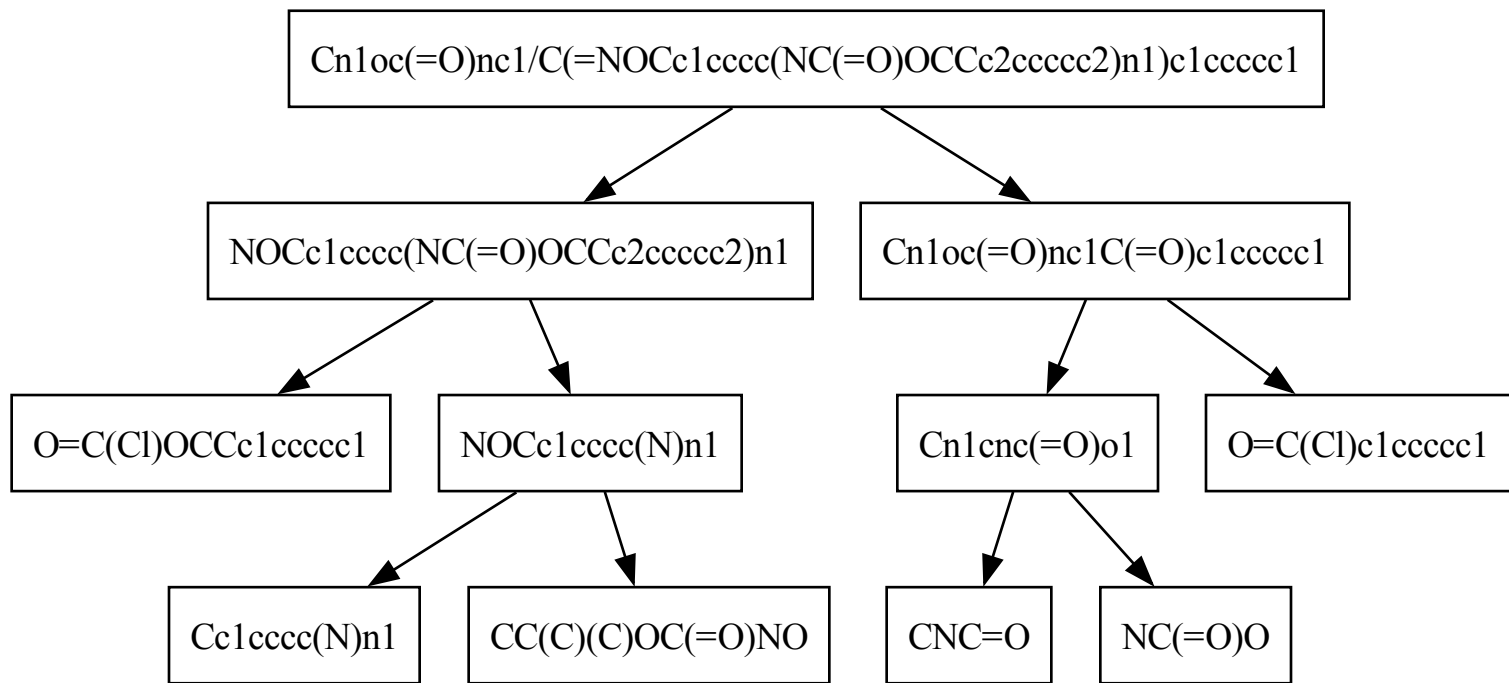

Supplement: supplementary_material [file mol_30_route_optimal.pdf › materials9084/retro190_solutions/mol_30_route_optimal.pdf]

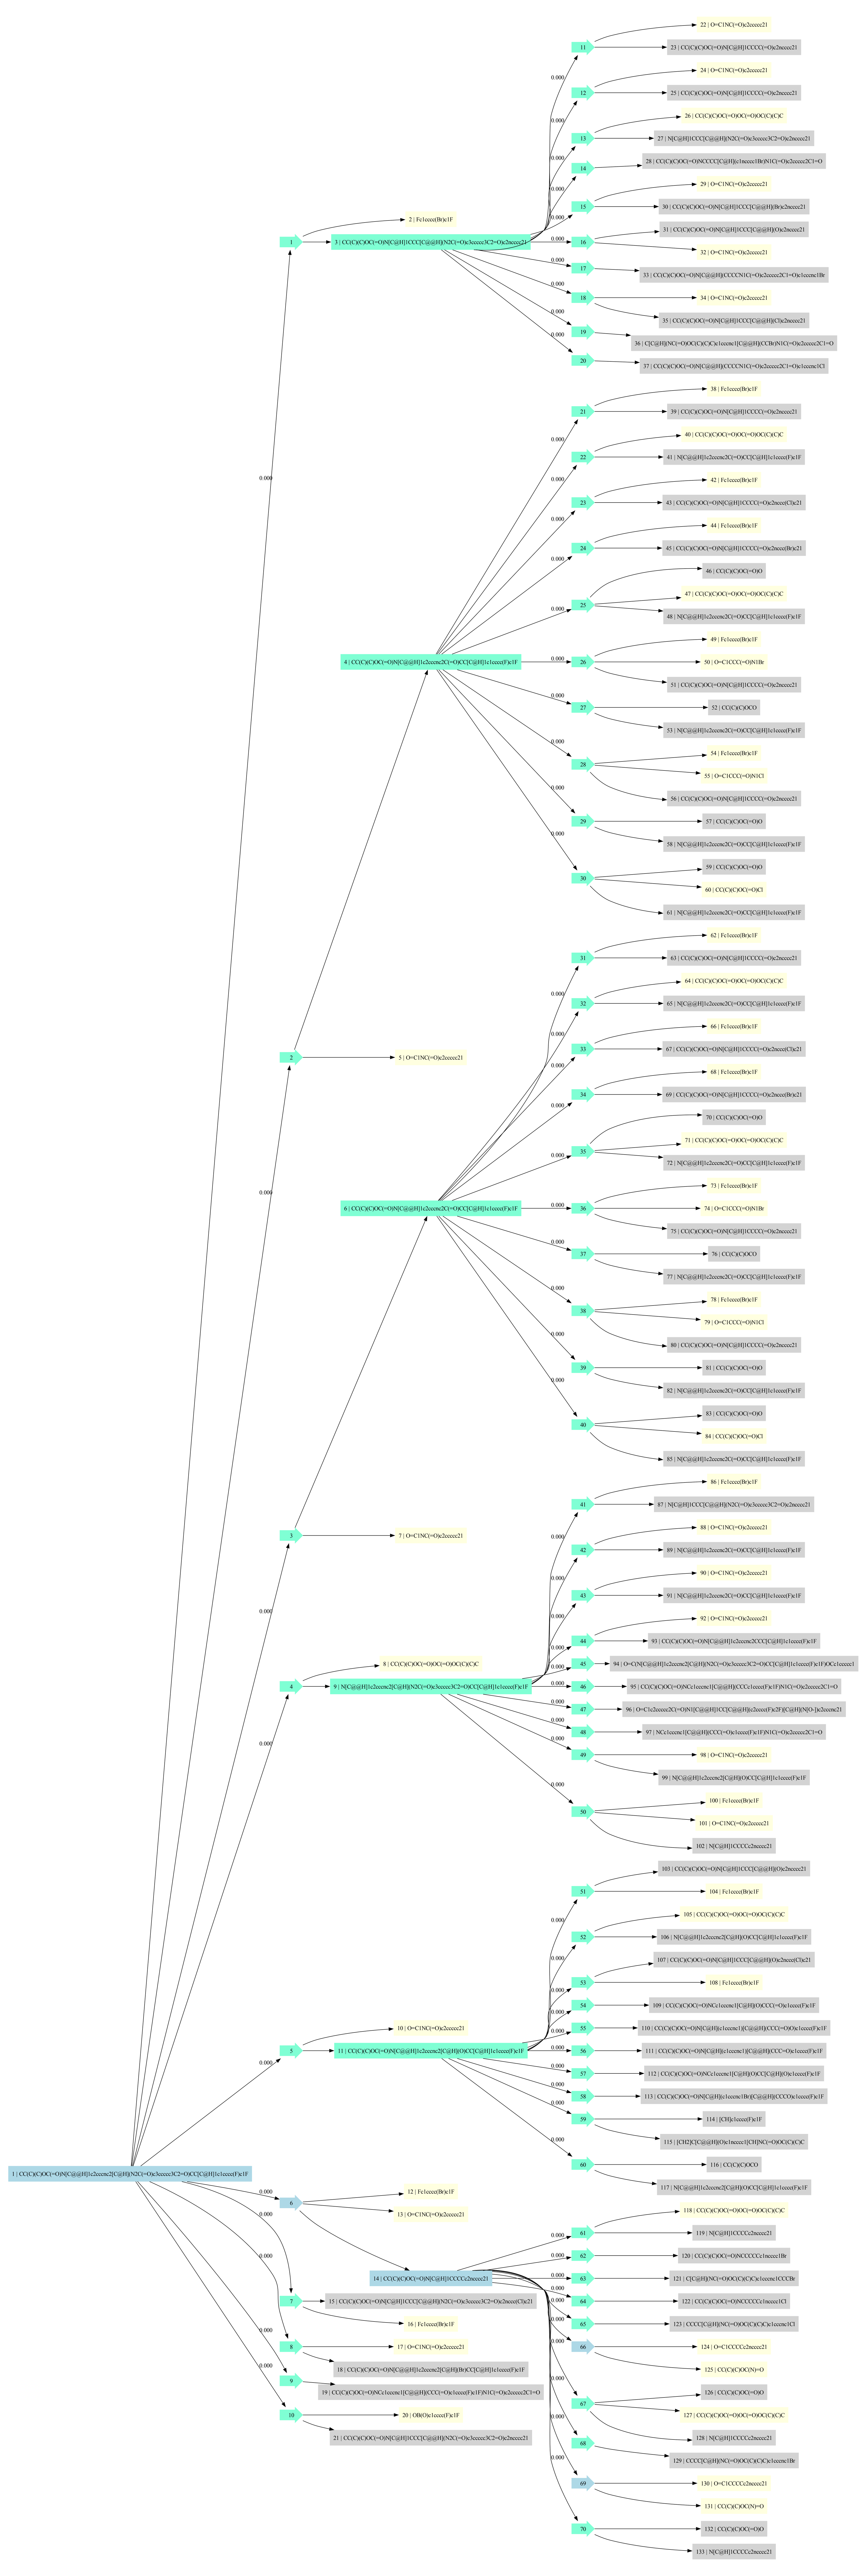

Supplement: supplementary_material [file mol_31_search_tree.pdf › materials9084/retro190_solutions/mol_31_search_tree.pdf]
