# Supplementary material (part 2 of 2)
Source: ML conference proceedings conference paper supplement (https://openreview.net/forum?id=m7uj1vIZ62)

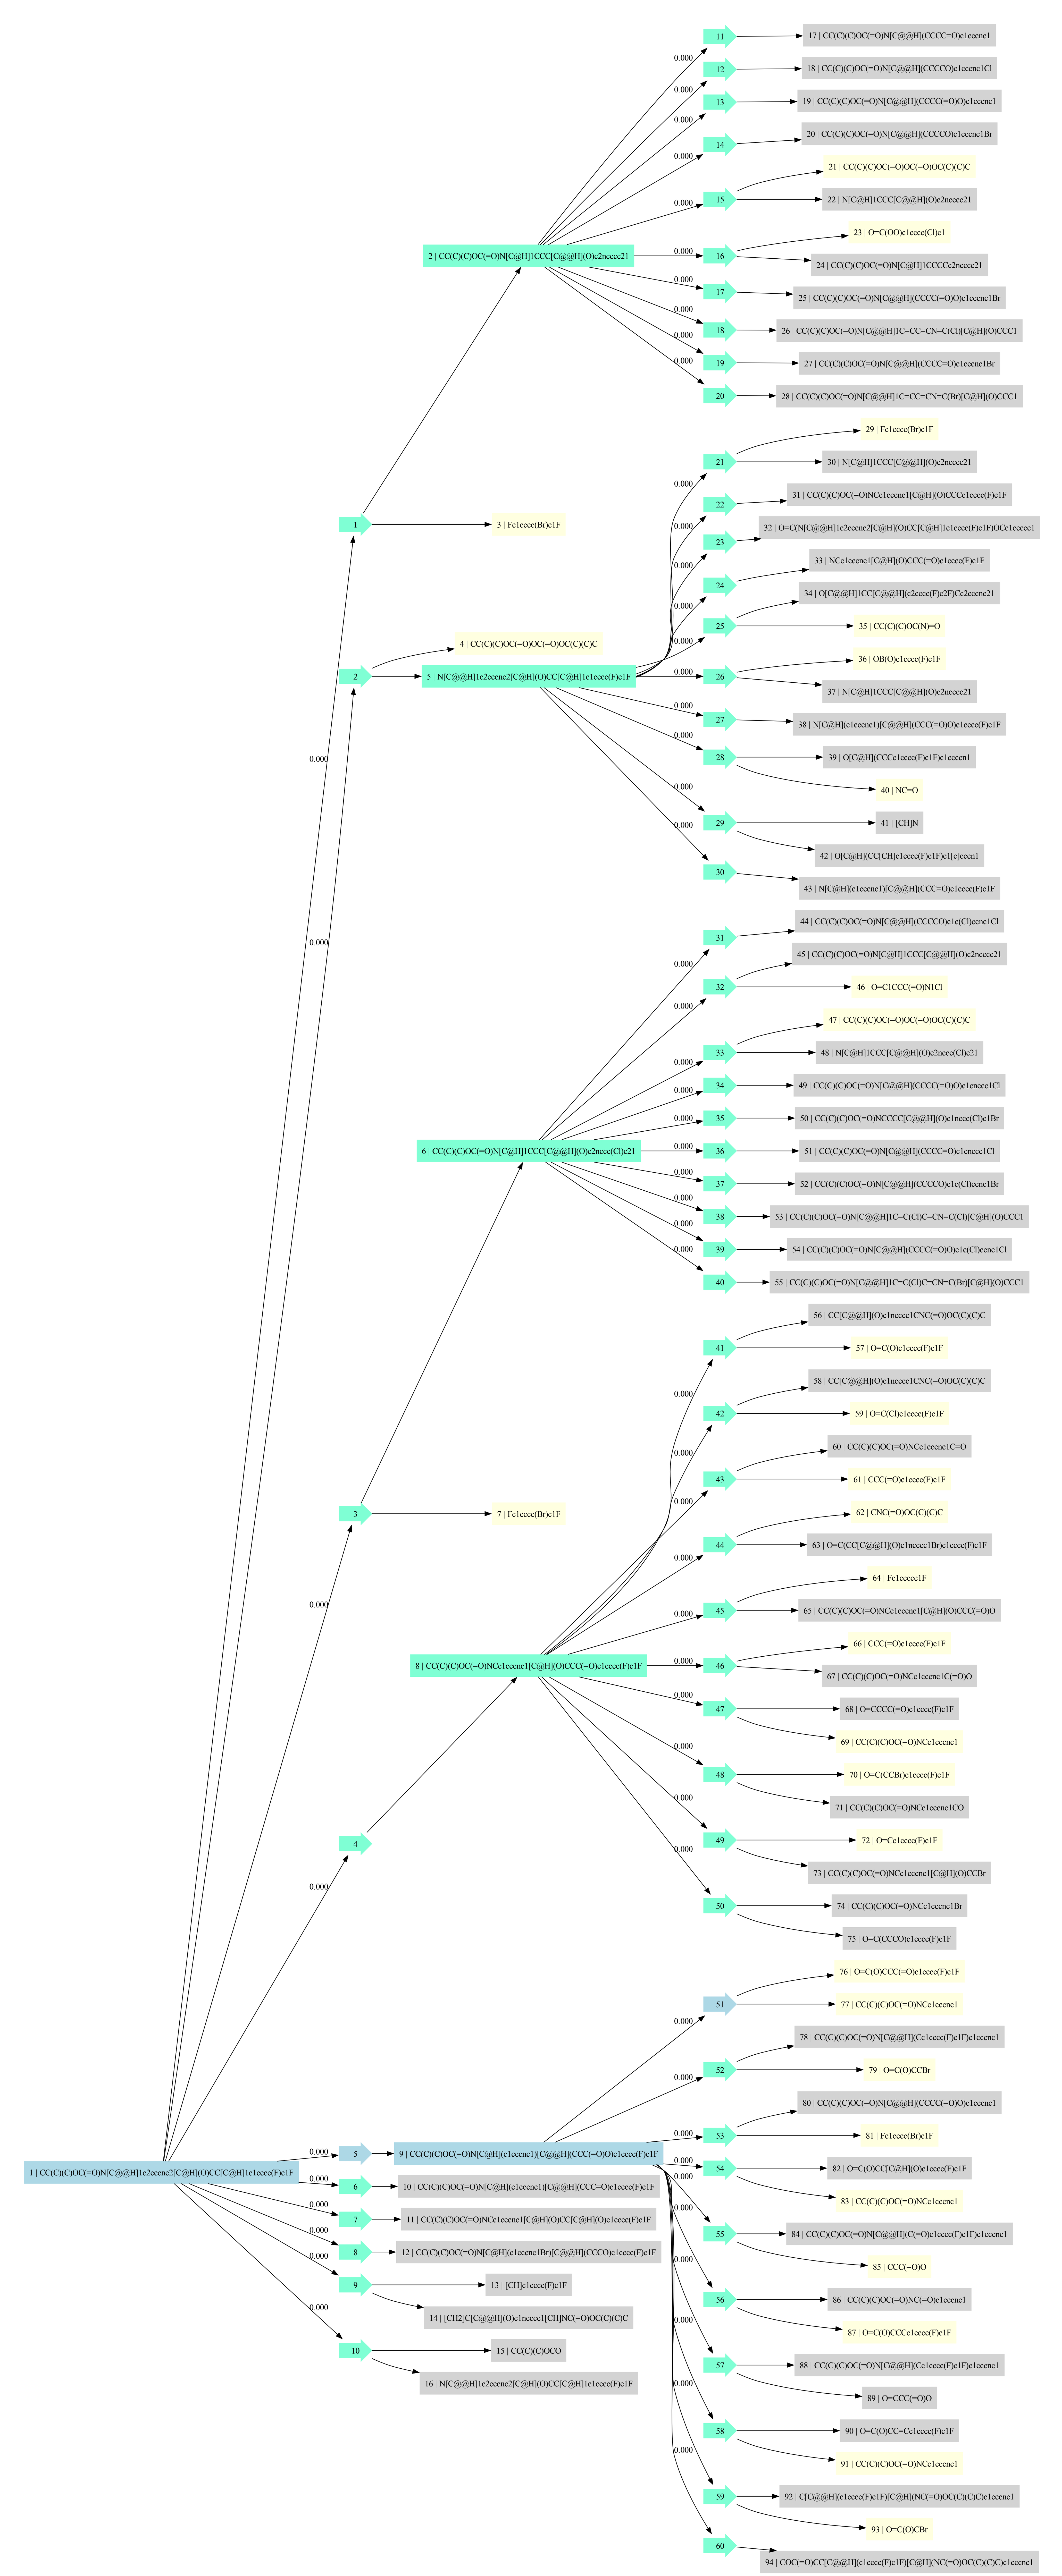

Supplement: supplementary_material [file mol_32_search_tree.pdf › materials9084/retro190_solutions/mol_32_search_tree.pdf]

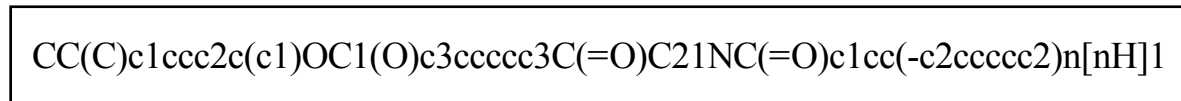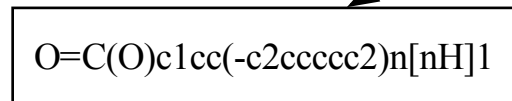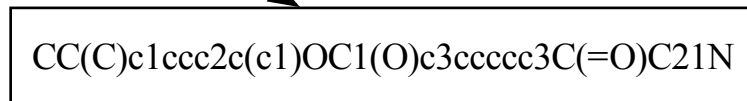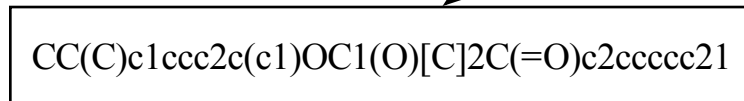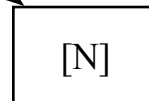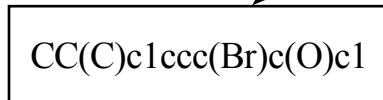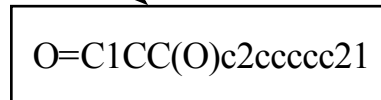

Supplement: supplementary_material [file mol_33_route_optimal.pdf › materials9084/retro190_solutions/mol_33_route_optimal.pdf]

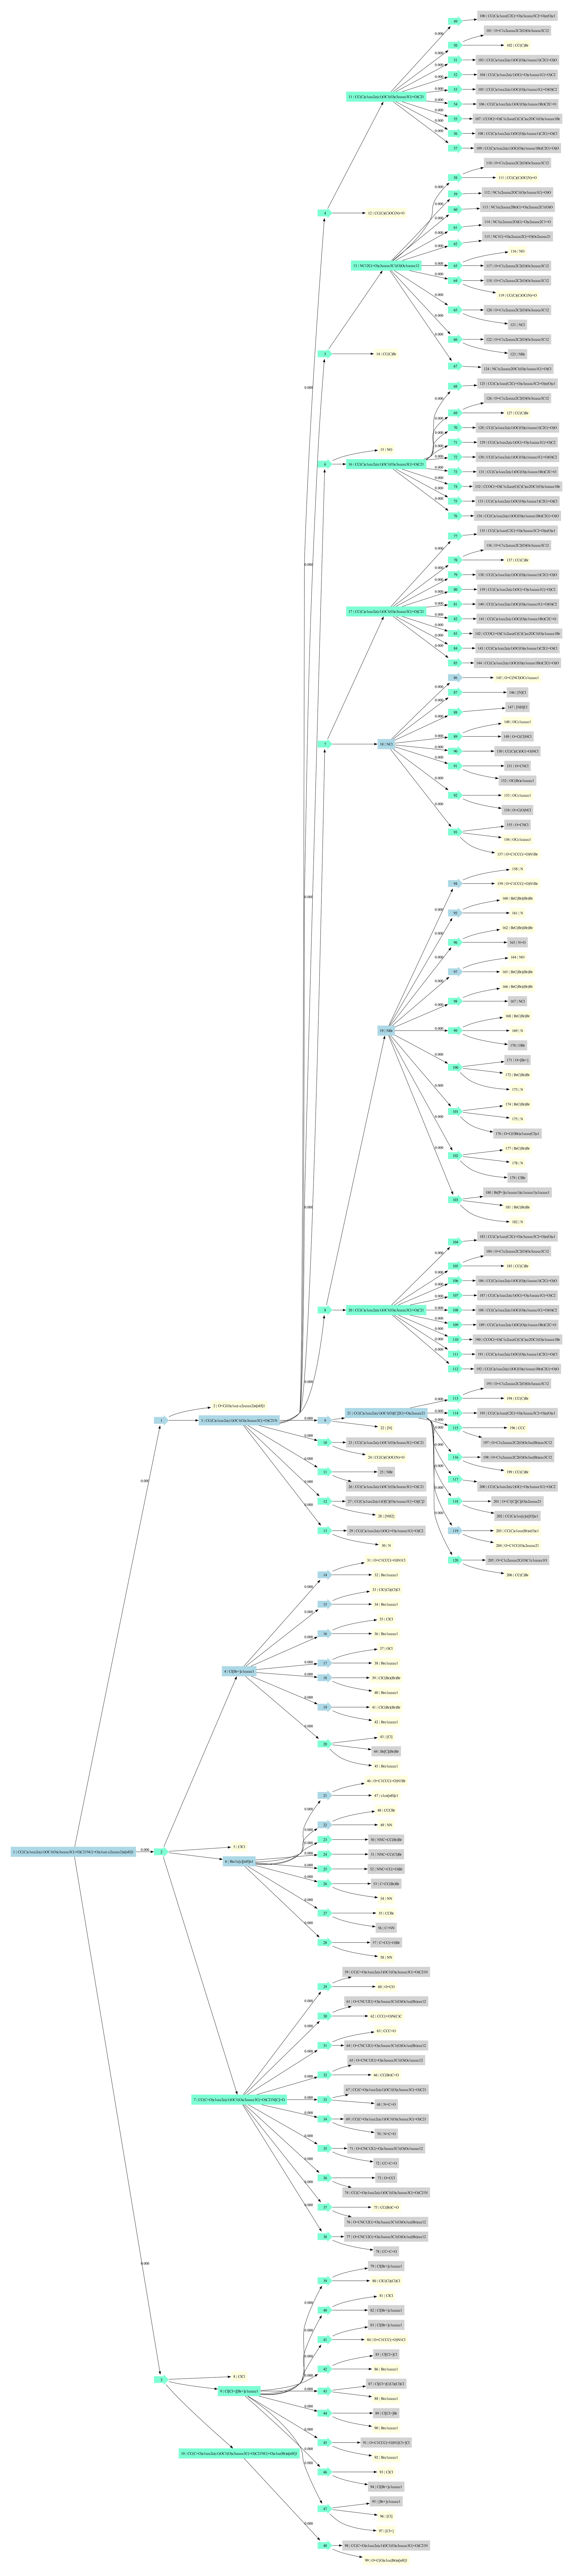

Supplement: supplementary_material [file mol_33_search_tree.pdf › materials9084/retro190_solutions/mol_33_search_tree.pdf]

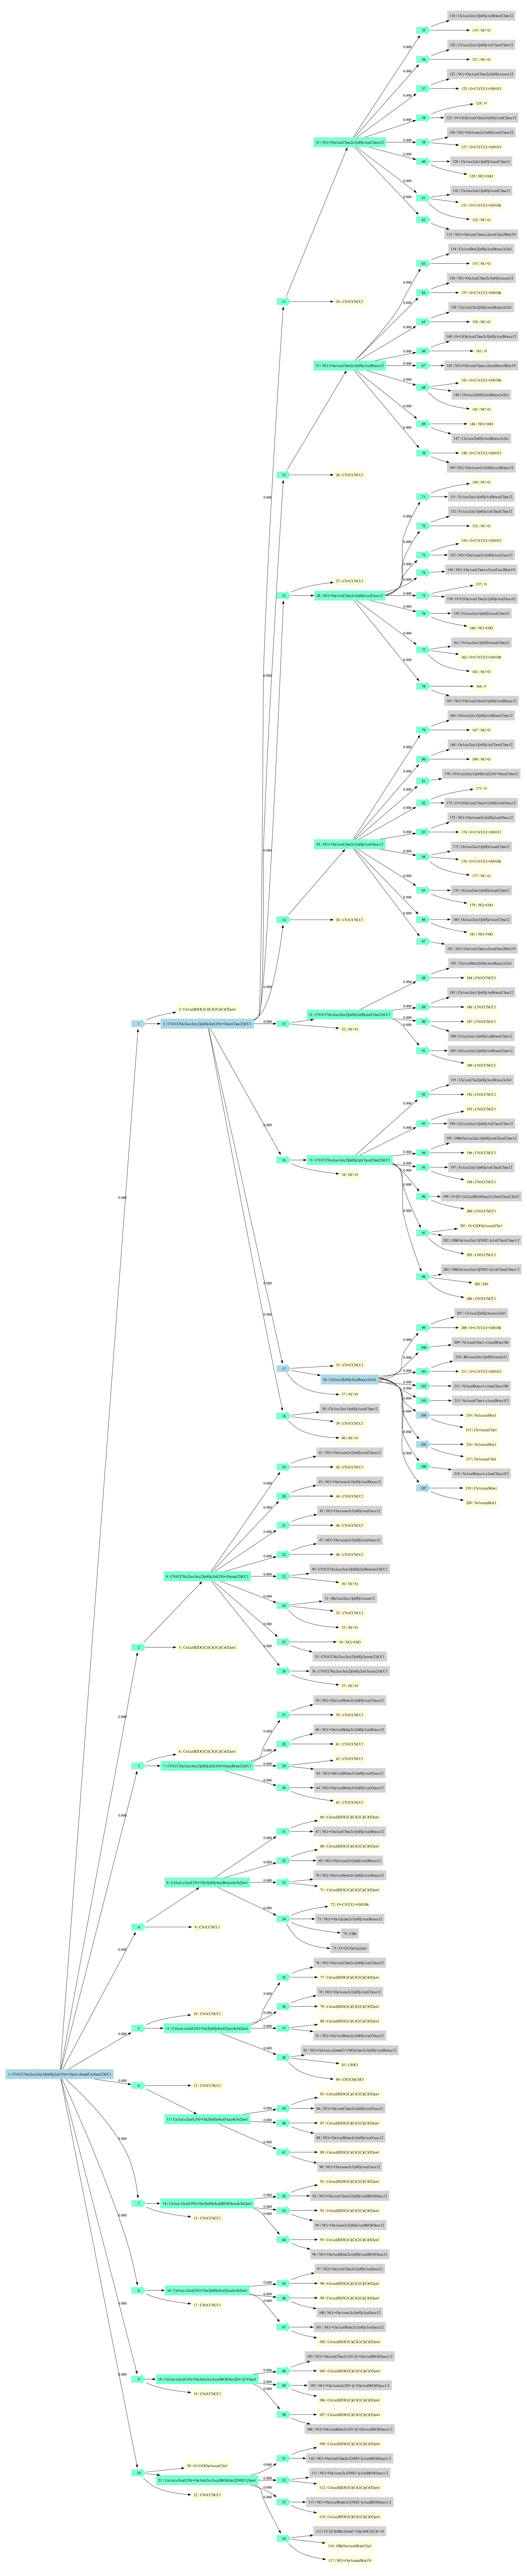

Supplement: supplementary_material [file mol_34_search_tree.pdf › materials9084/retro190_solutions/mol_34_search_tree.pdf]

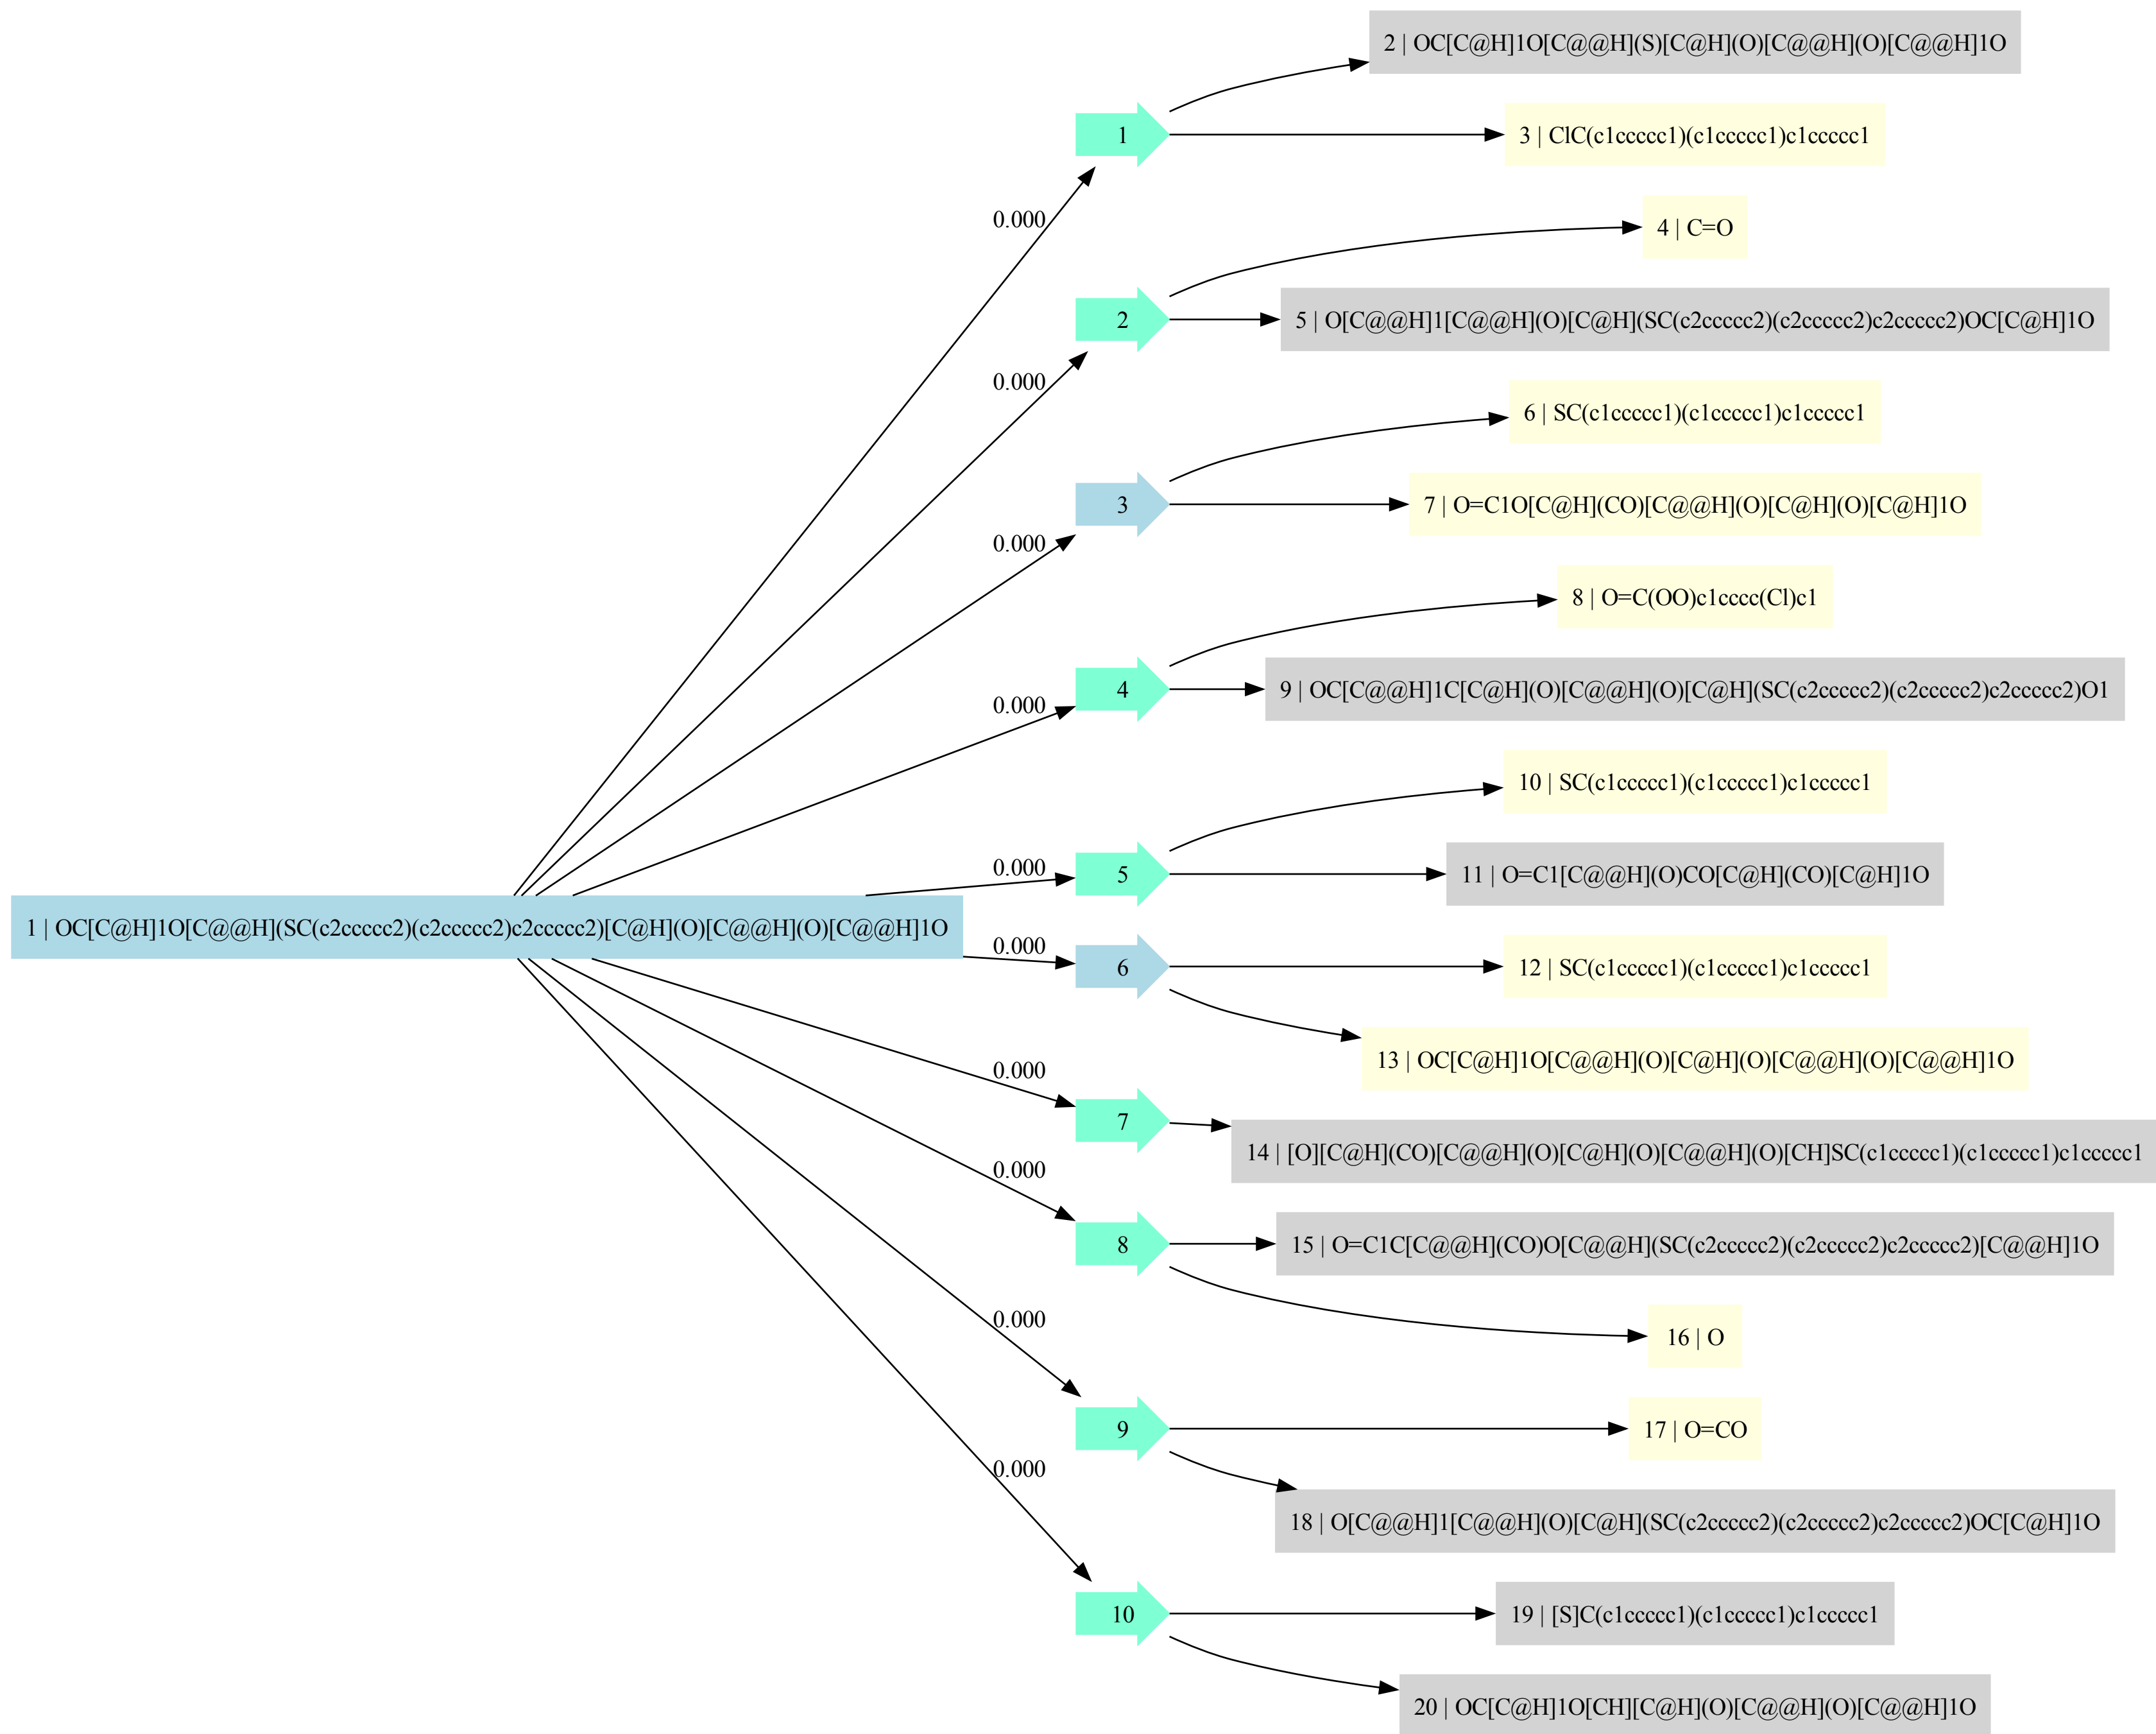

Supplement: supplementary_material [file mol_35_search_tree.pdf › materials9084/retro190_solutions/mol_35_search_tree.pdf]

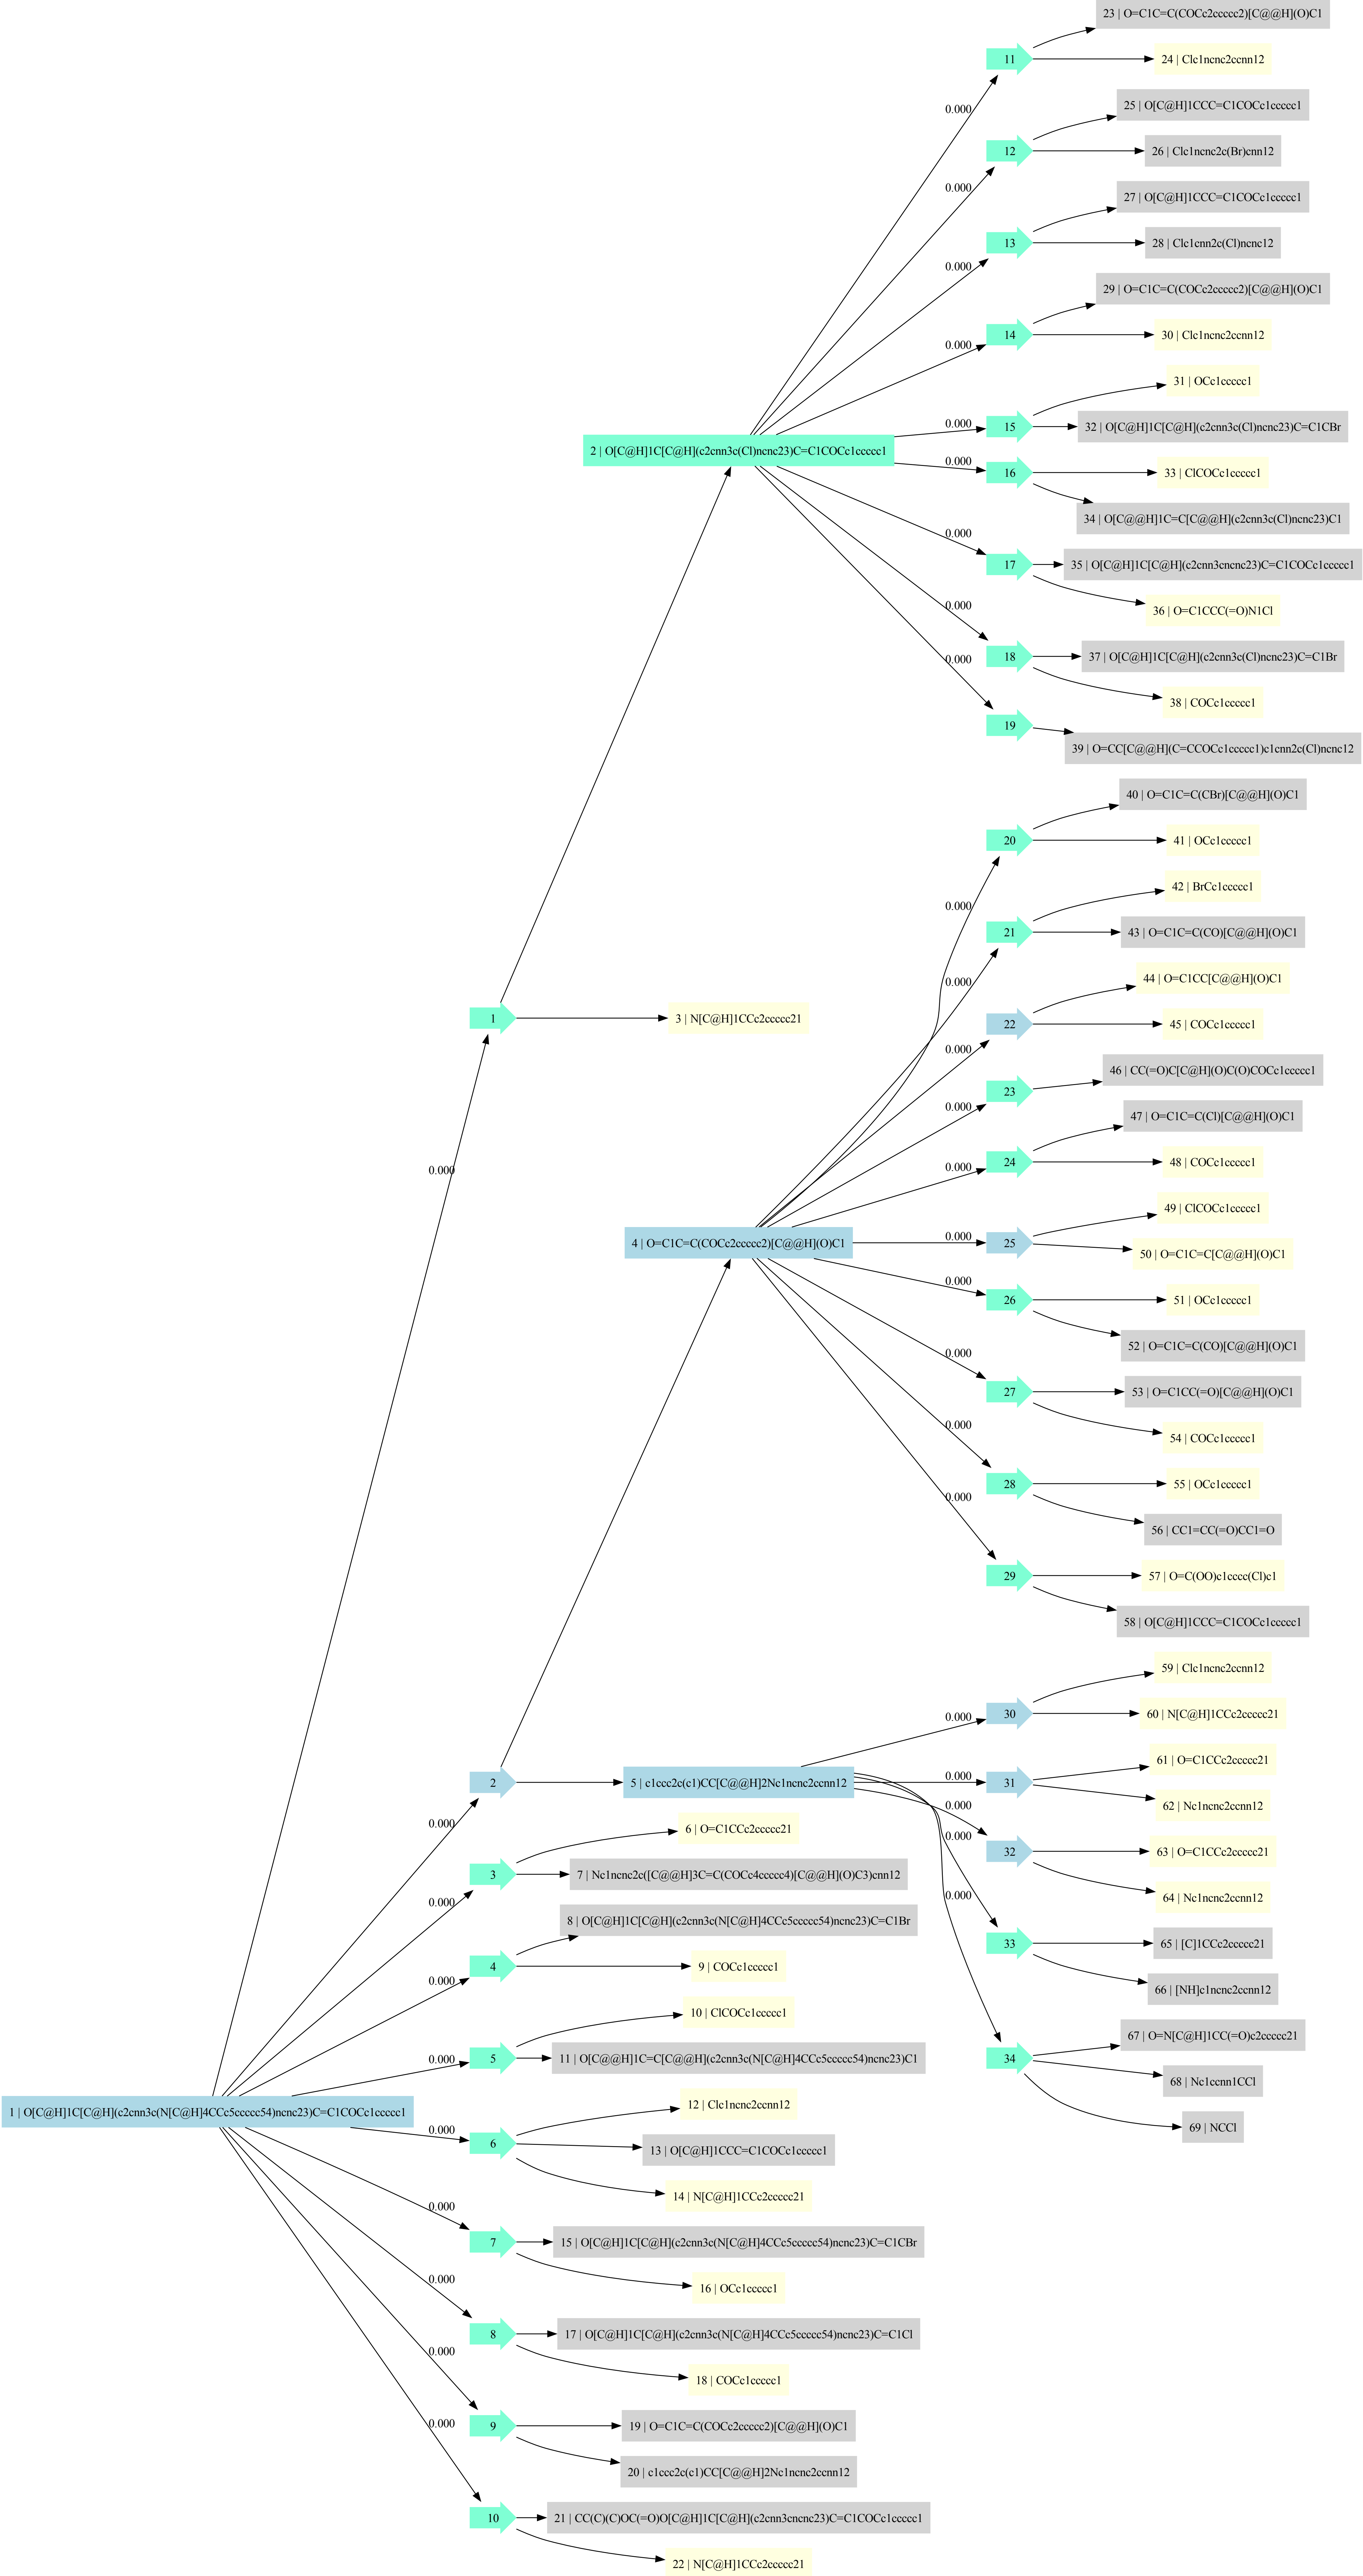

Supplement: supplementary_material [file mol_36_search_tree.pdf › materials9084/retro190_solutions/mol_36_search_tree.pdf]

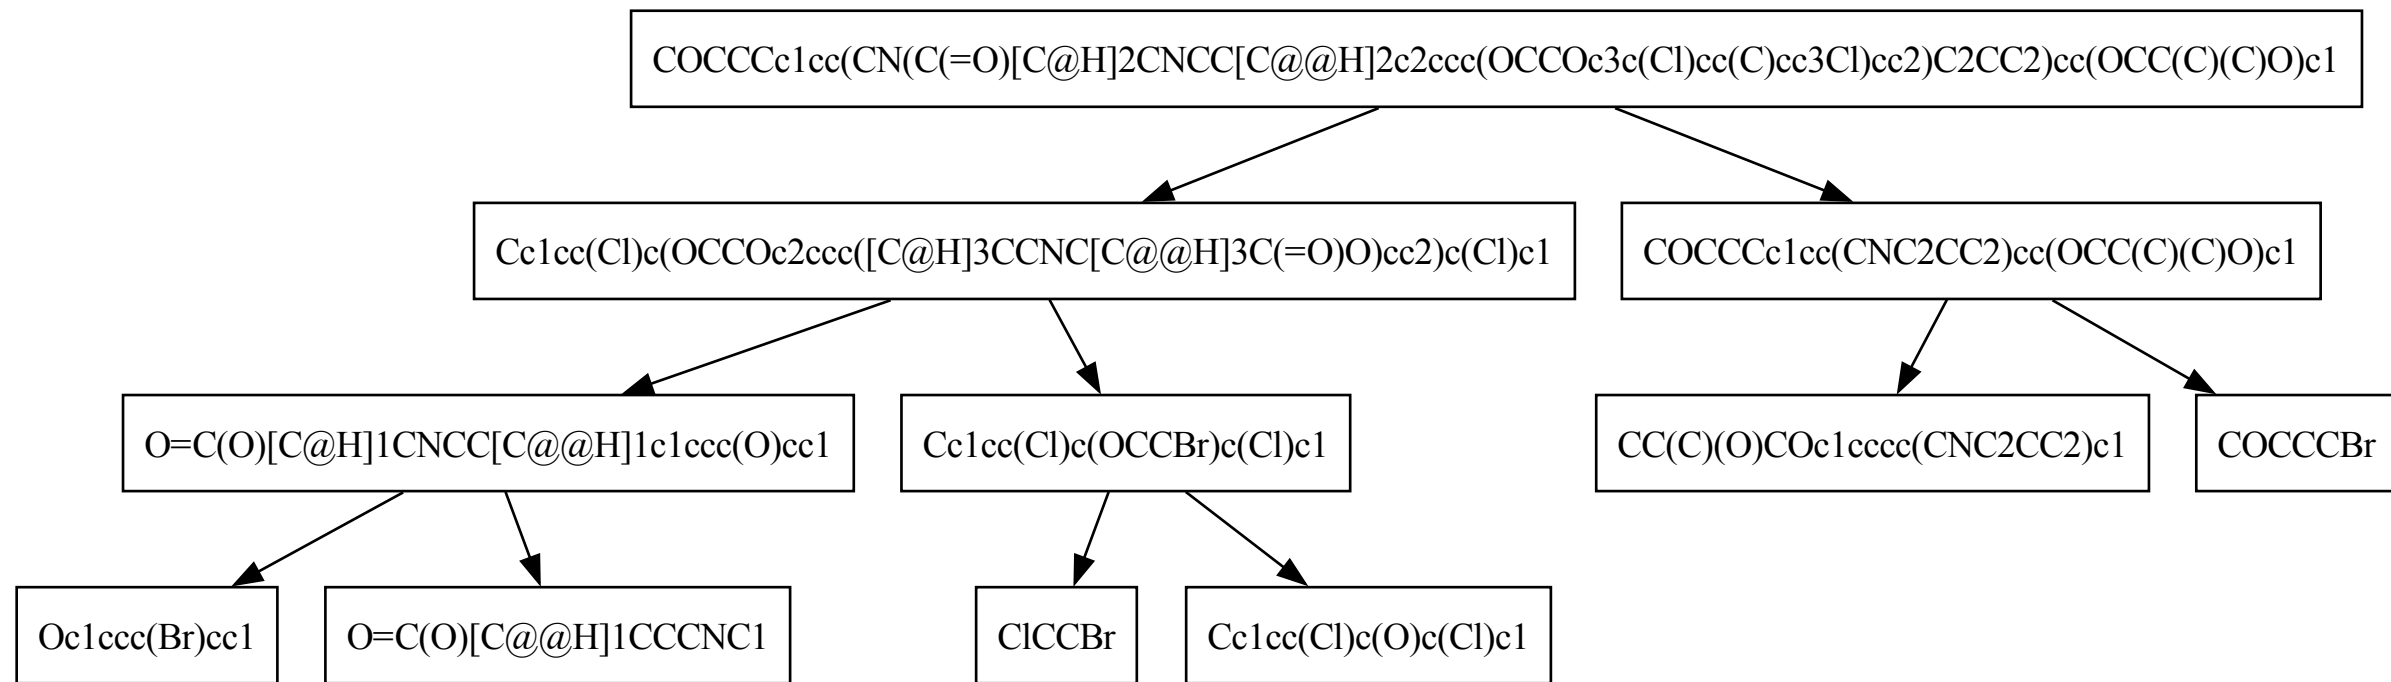

Supplement: supplementary_material [file mol_38_route_optimal.pdf › materials9084/retro190_solutions/mol_38_route_optimal.pdf]

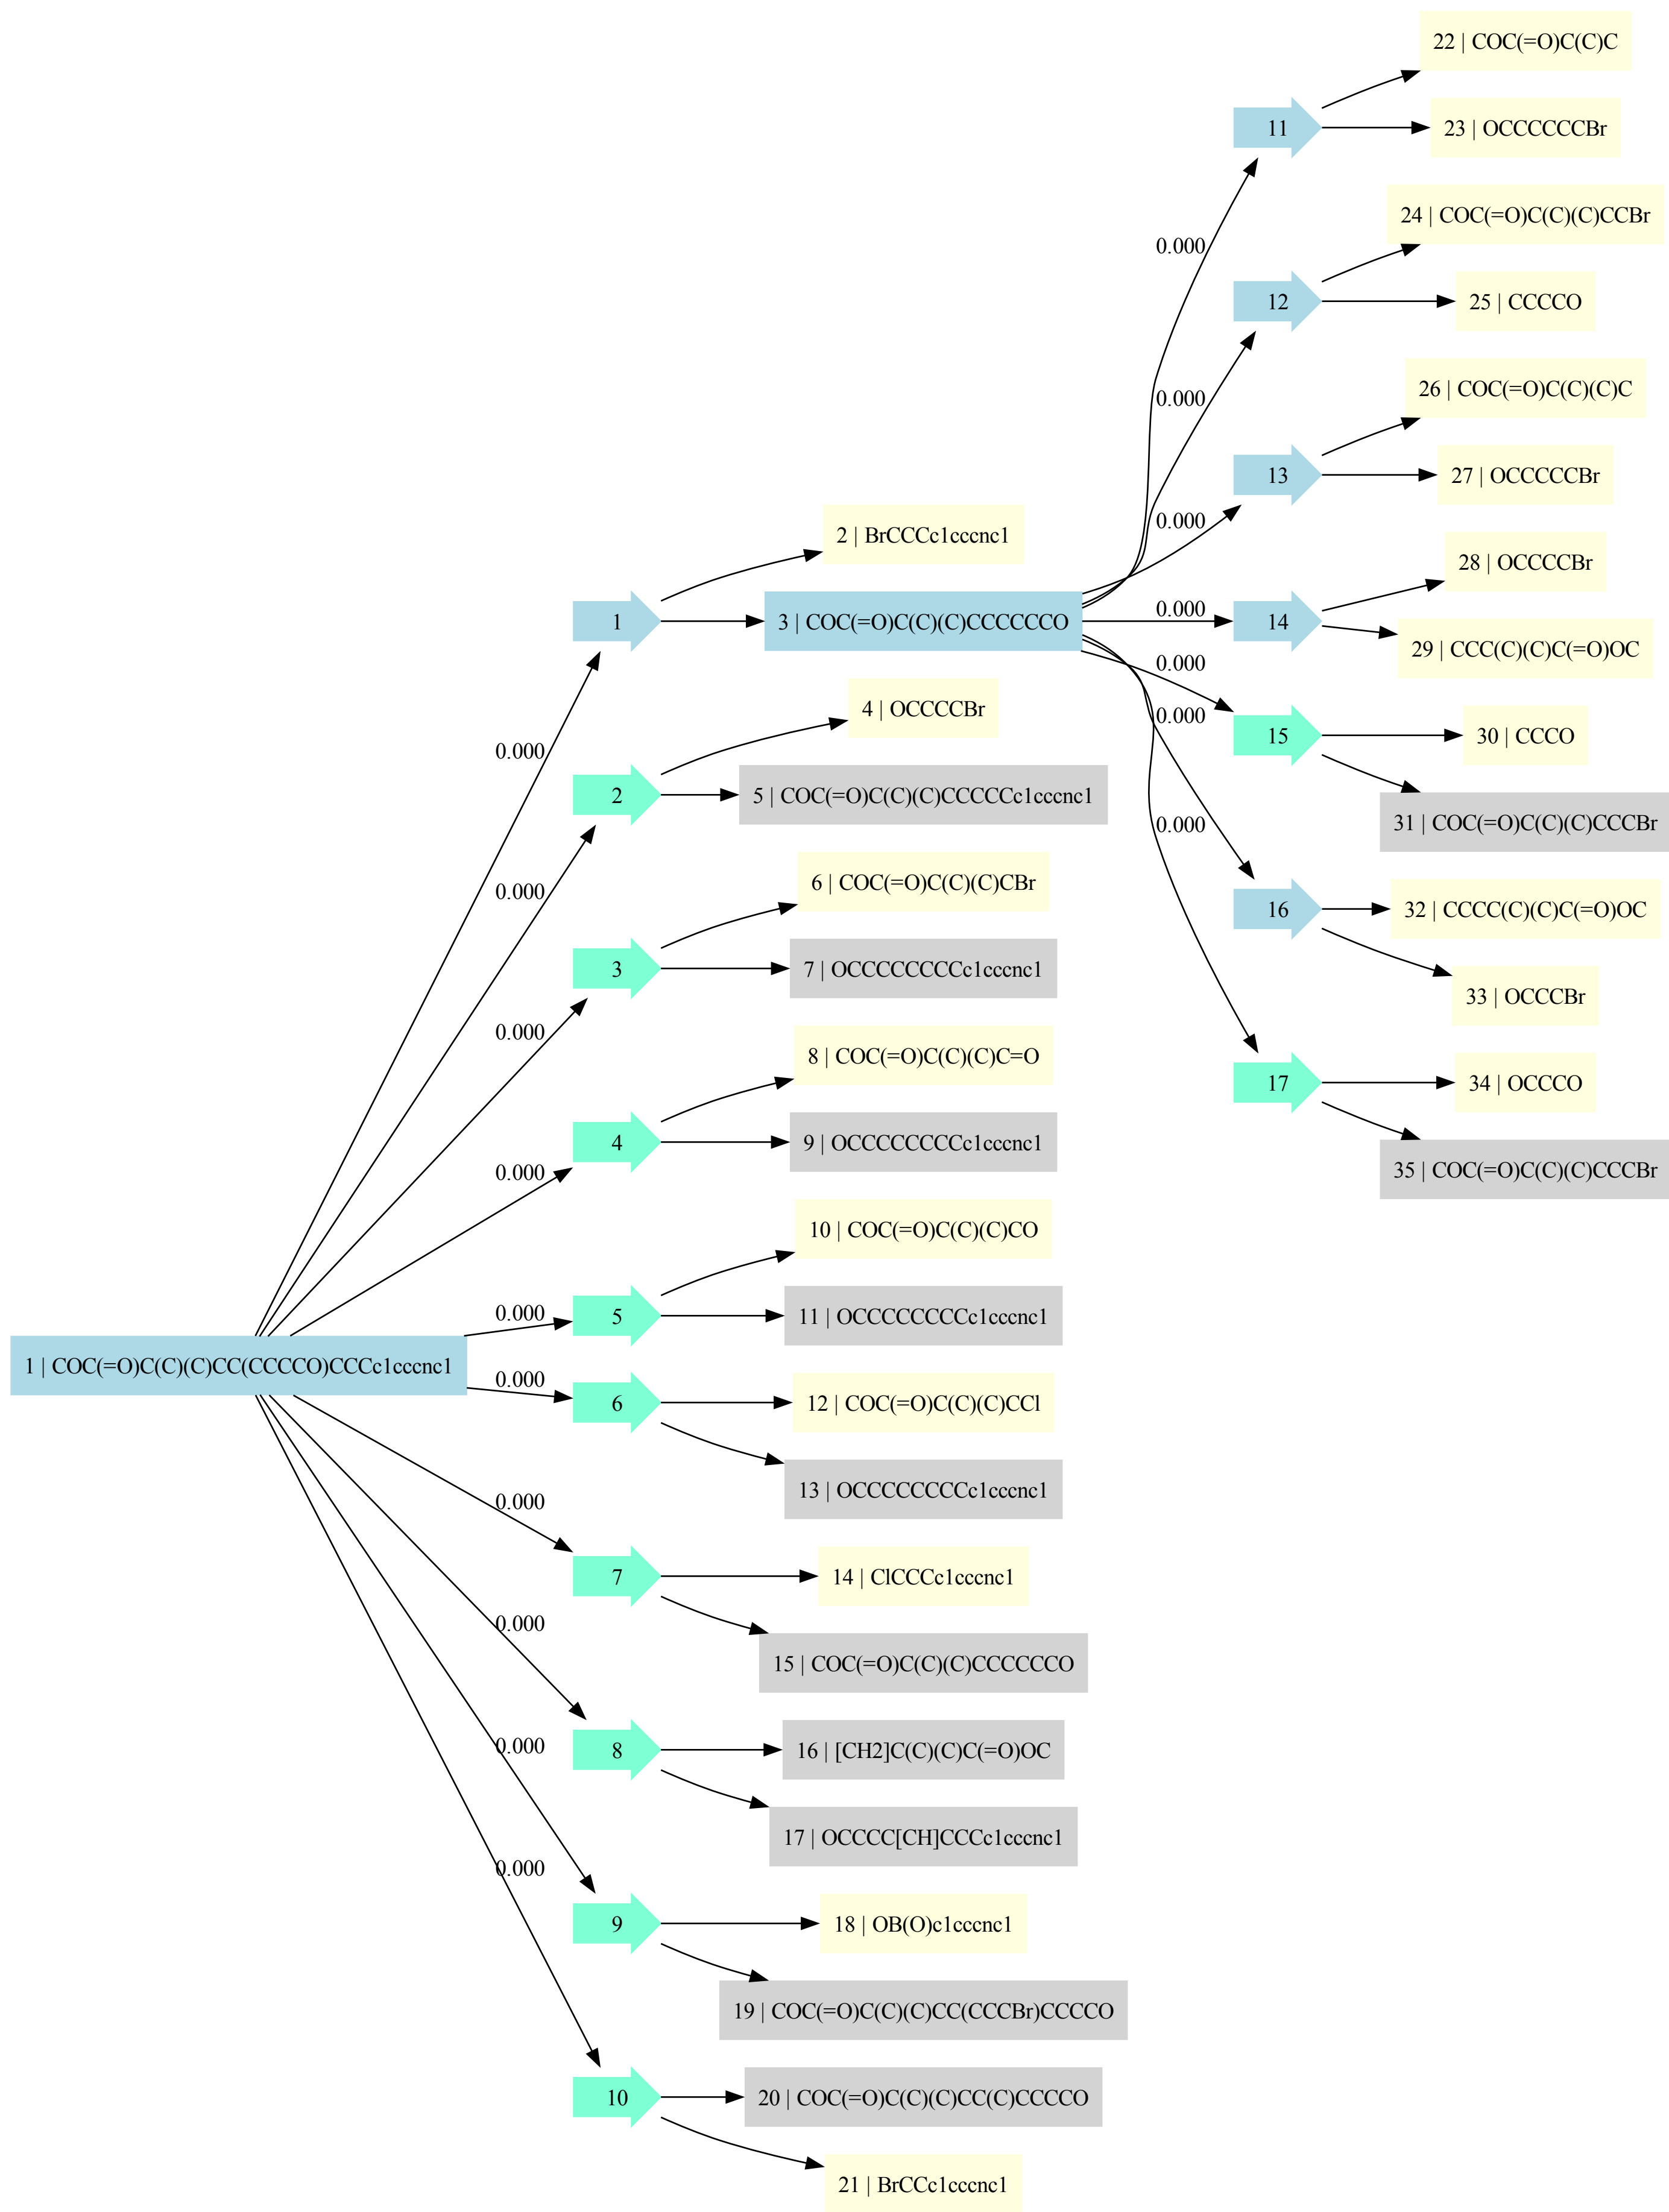

Supplement: supplementary_material [file mol_40_search_tree.pdf › materials9084/retro190_solutions/mol_40_search_tree.pdf]

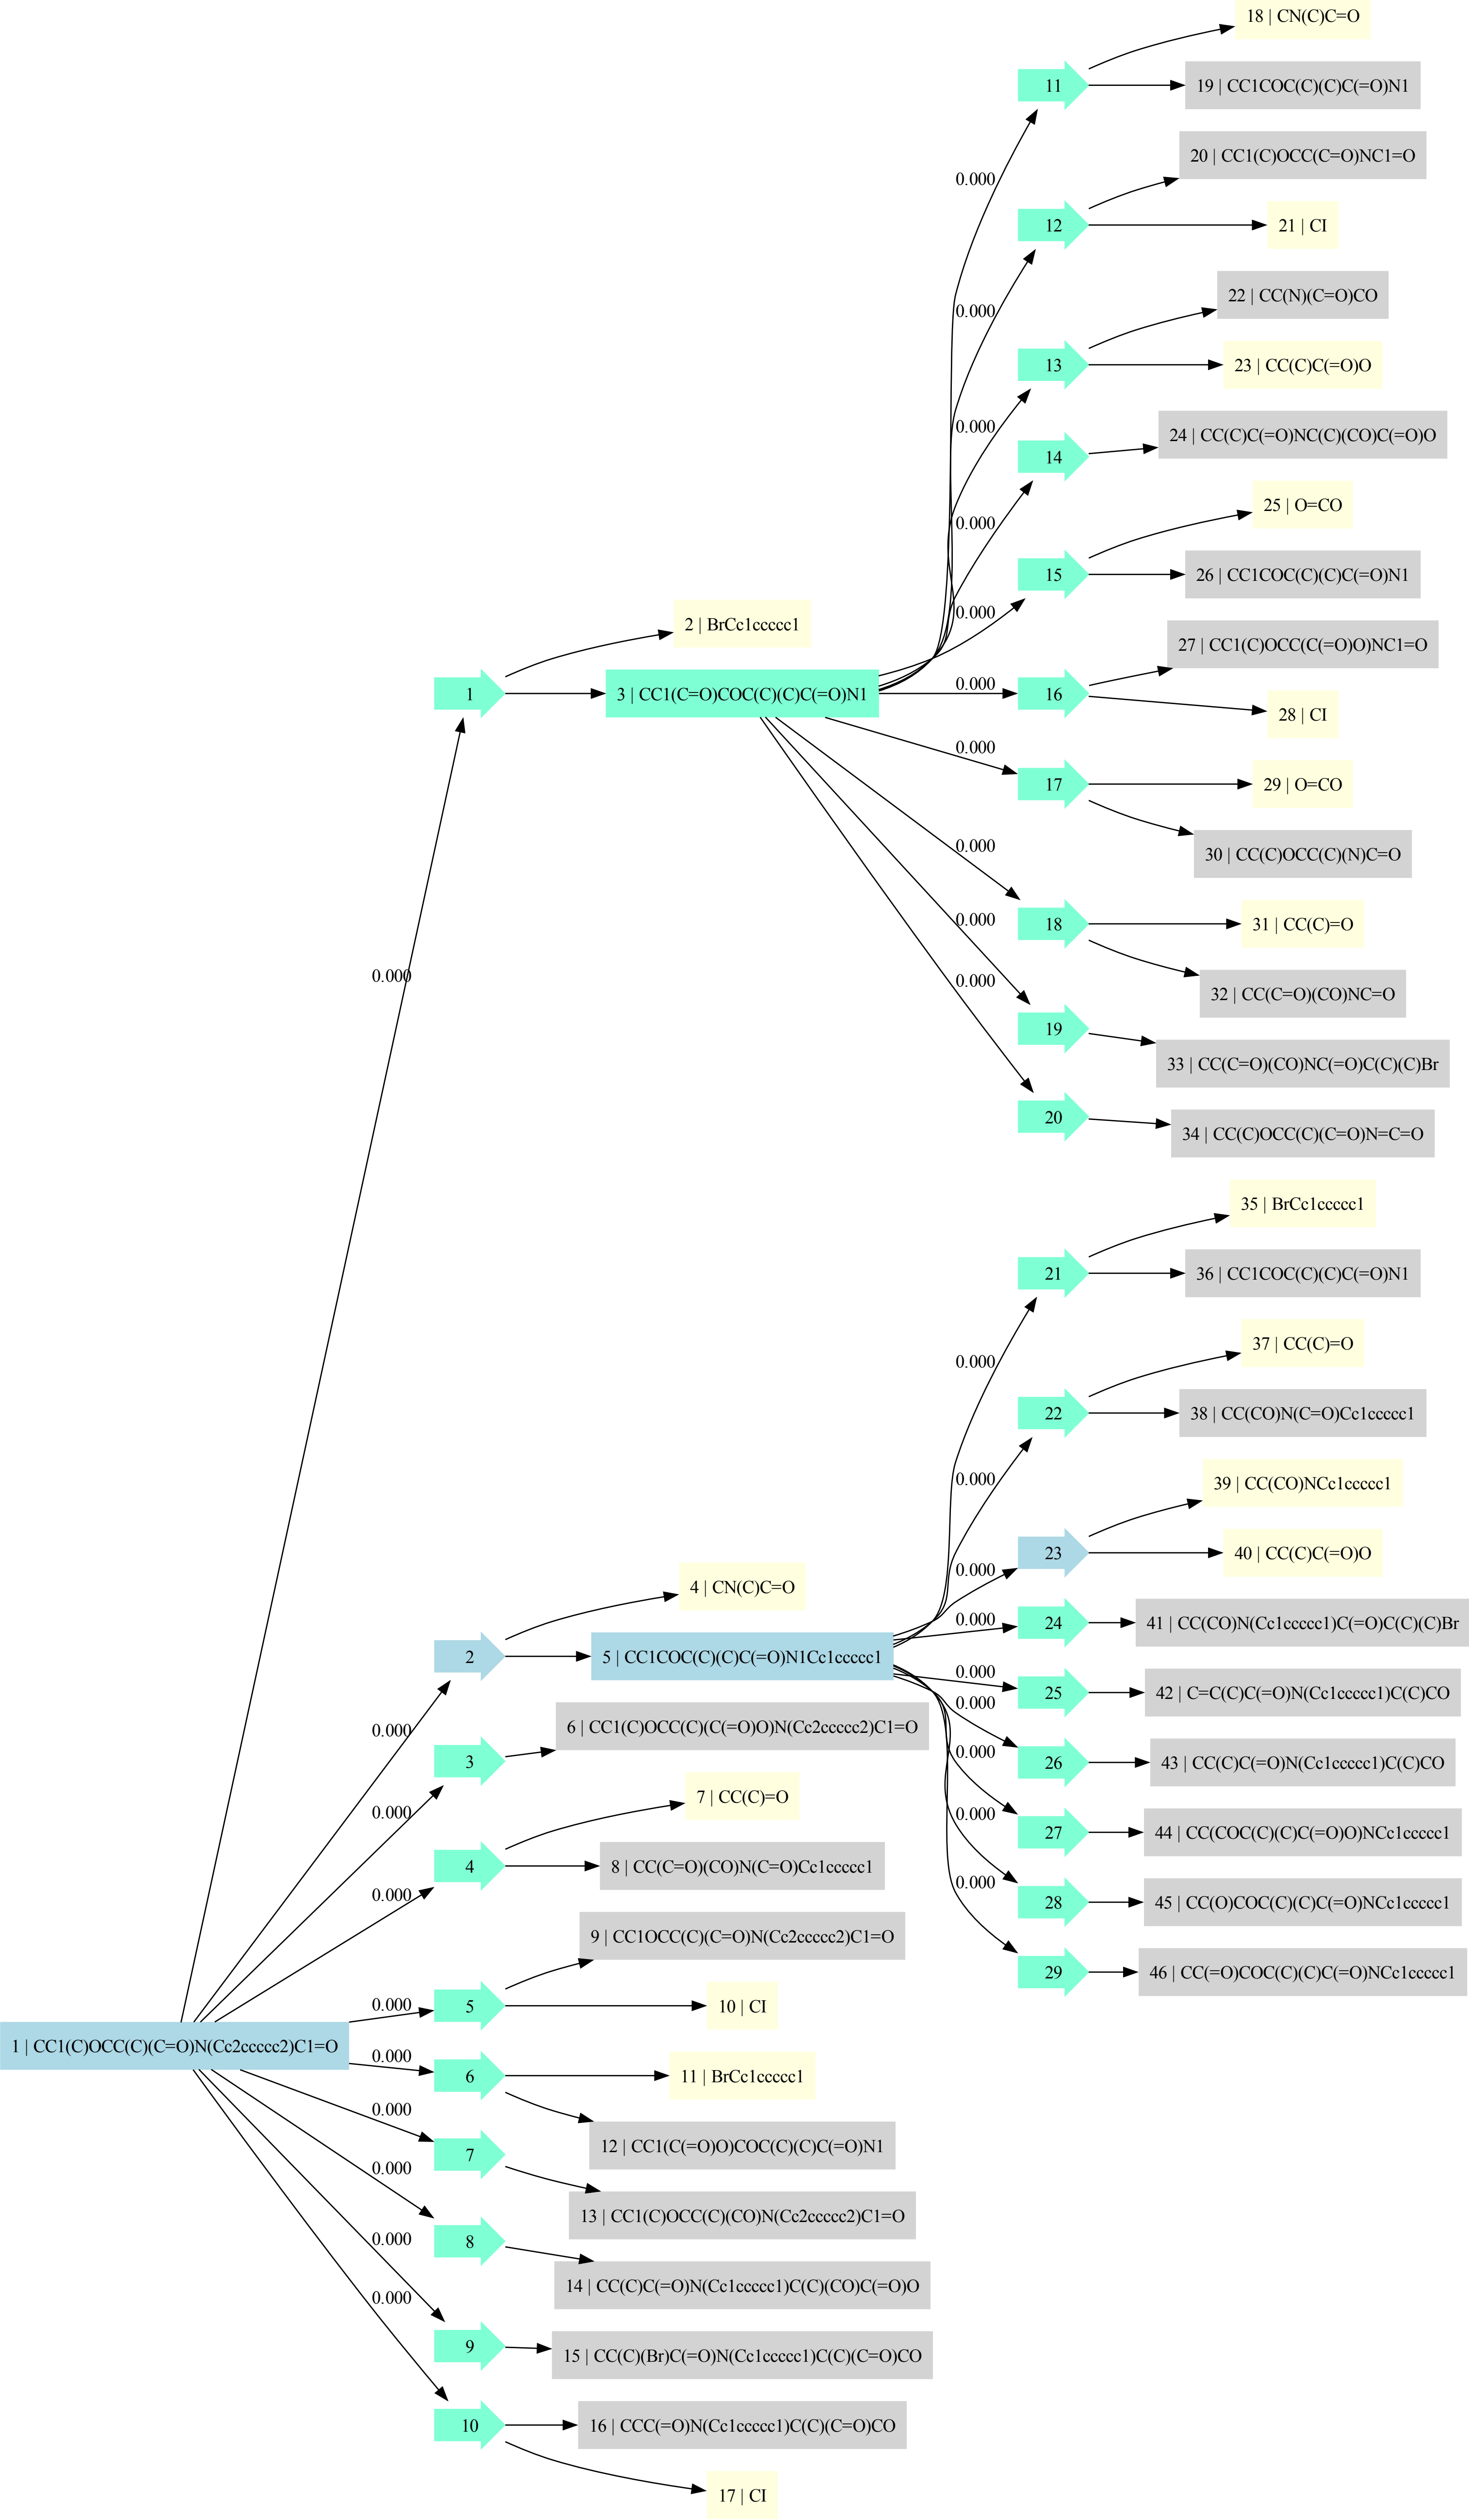

Supplement: supplementary_material [file mol_41_search_tree.pdf › materials9084/retro190_solutions/mol_41_search_tree.pdf]

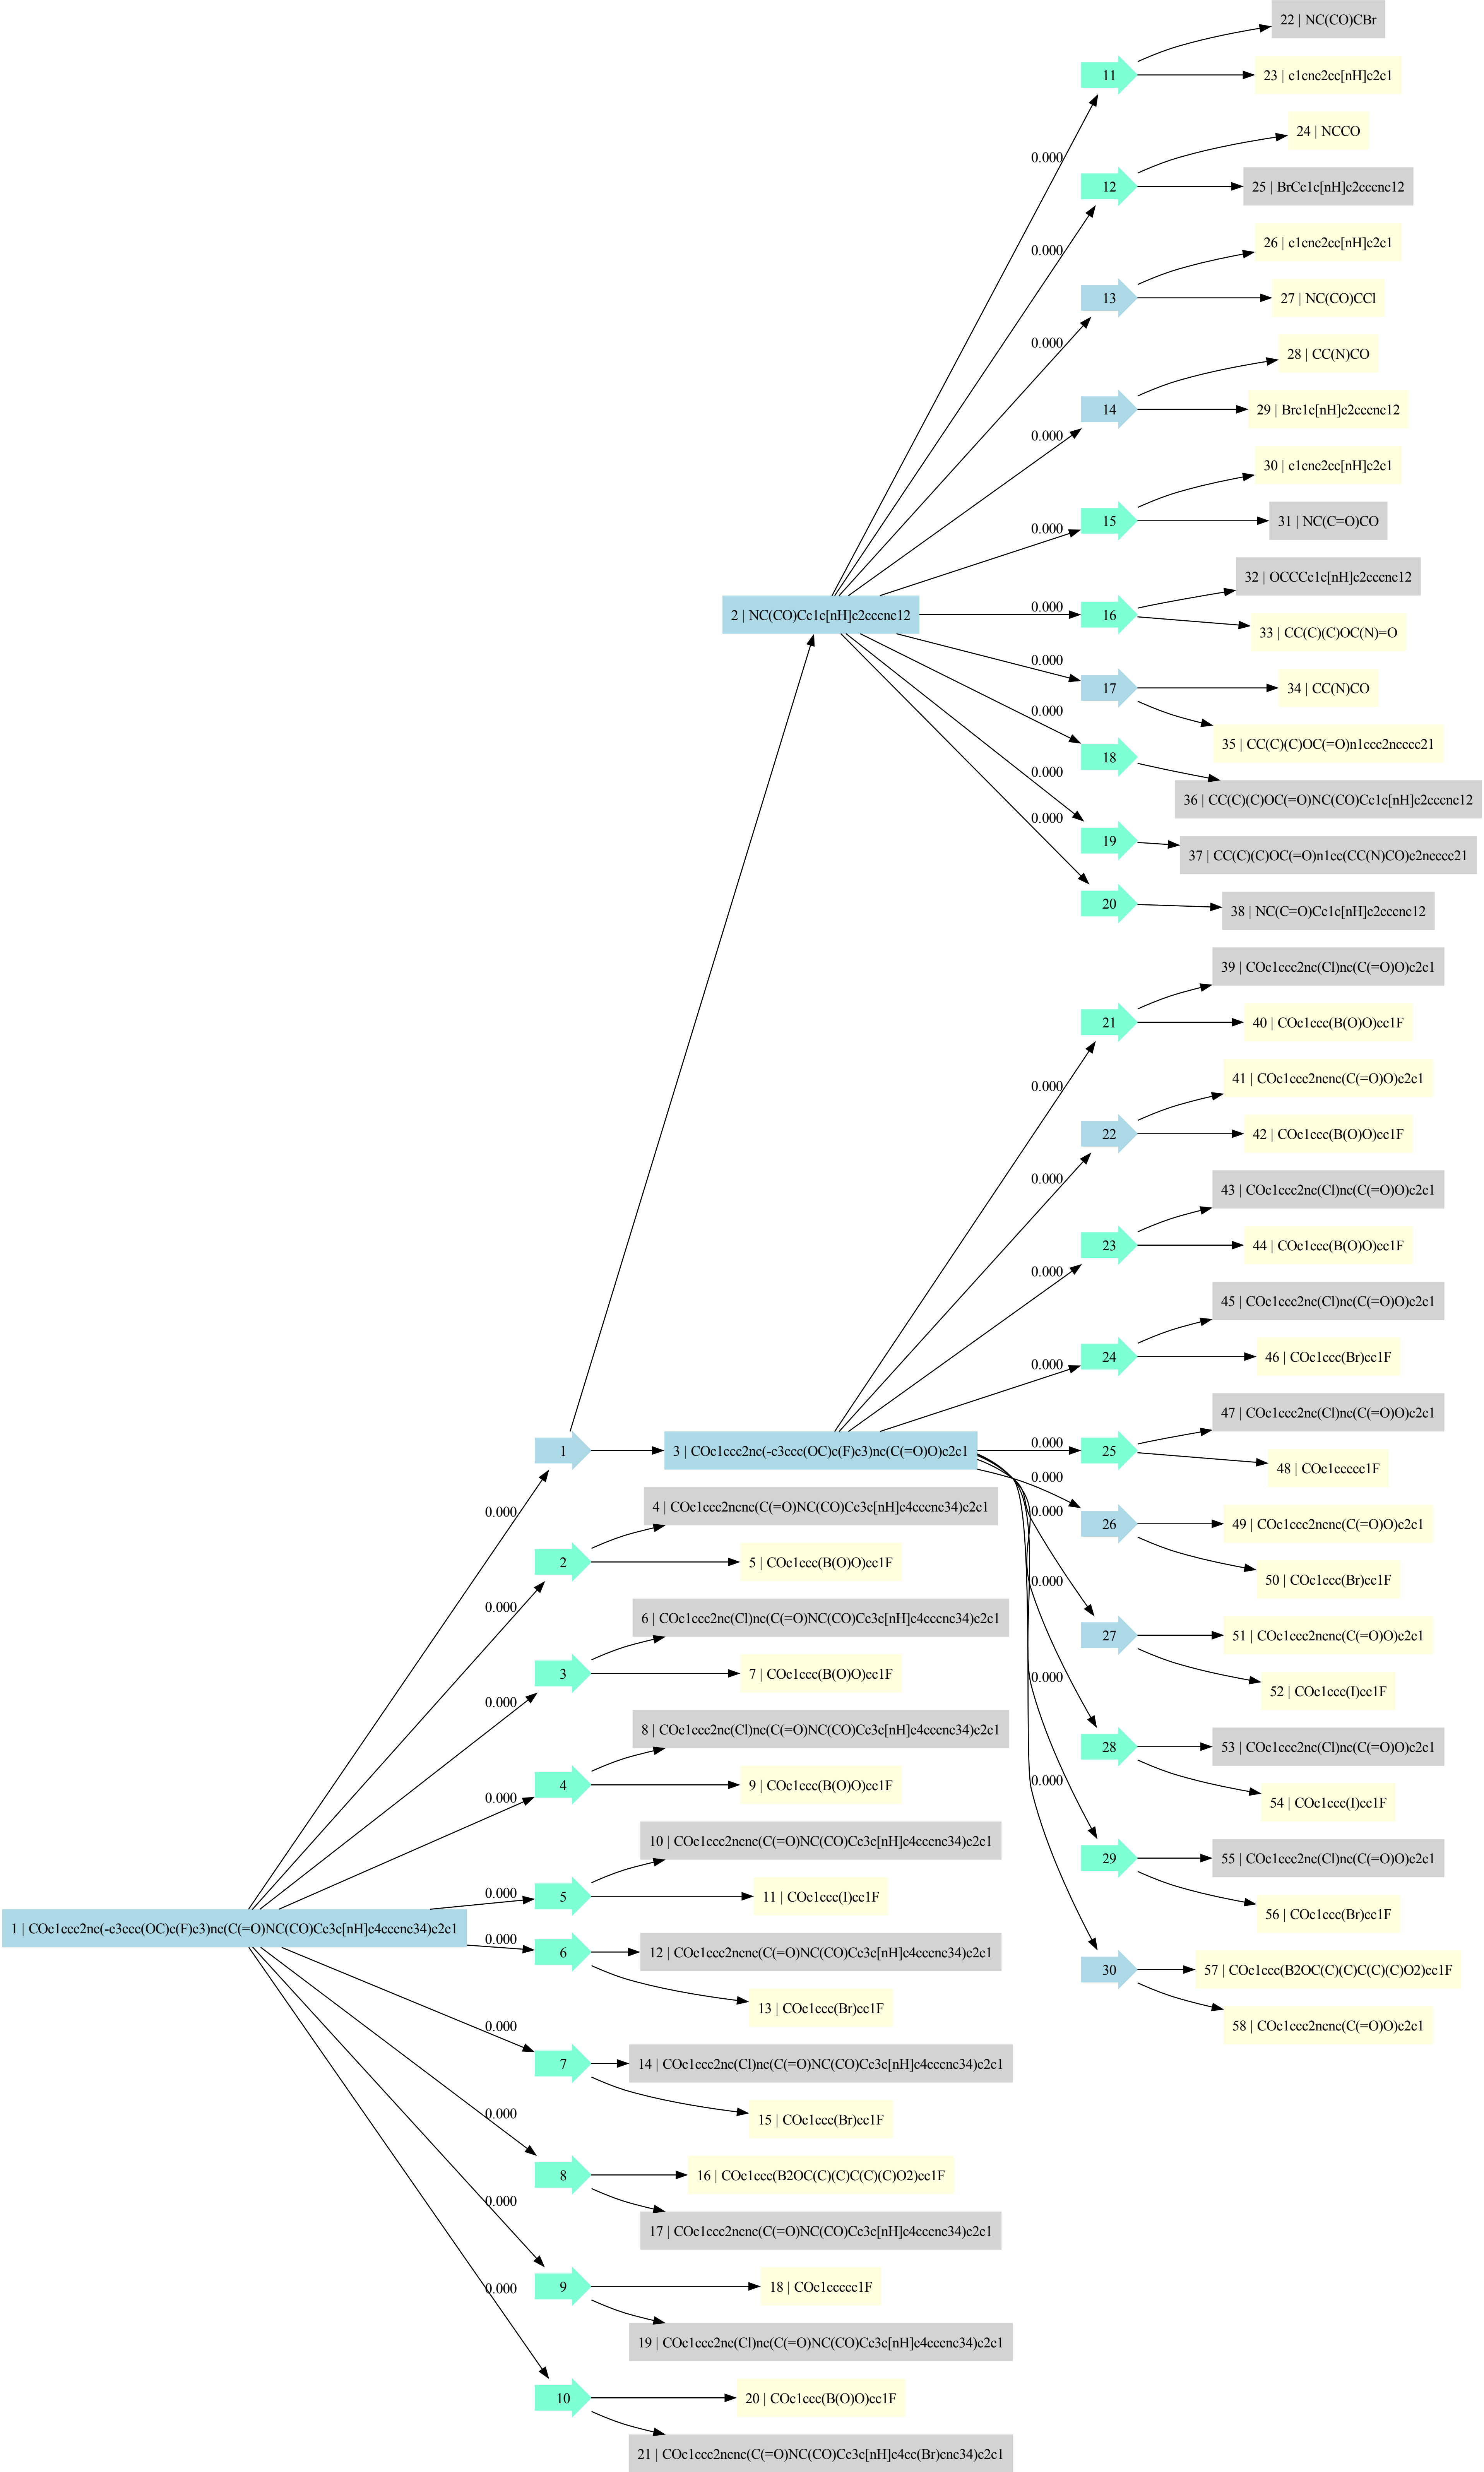

Supplement: supplementary_material [file mol_43_search_tree.pdf › materials9084/retro190_solutions/mol_43_search_tree.pdf]

COC(=O)[C@@H]1CCCC2(CCCCC2)[C@H]1O

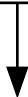

COC(=O)[C@@H](C=O)CCCC1CCCCC1

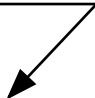

COC(=O)CC=O

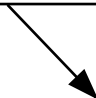

BrCCCC1CCCCC1

Supplement: supplementary_material [file mol_45_route_optimal.pdf › materials9084/retro190_solutions/mol_45_route_optimal.pdf]

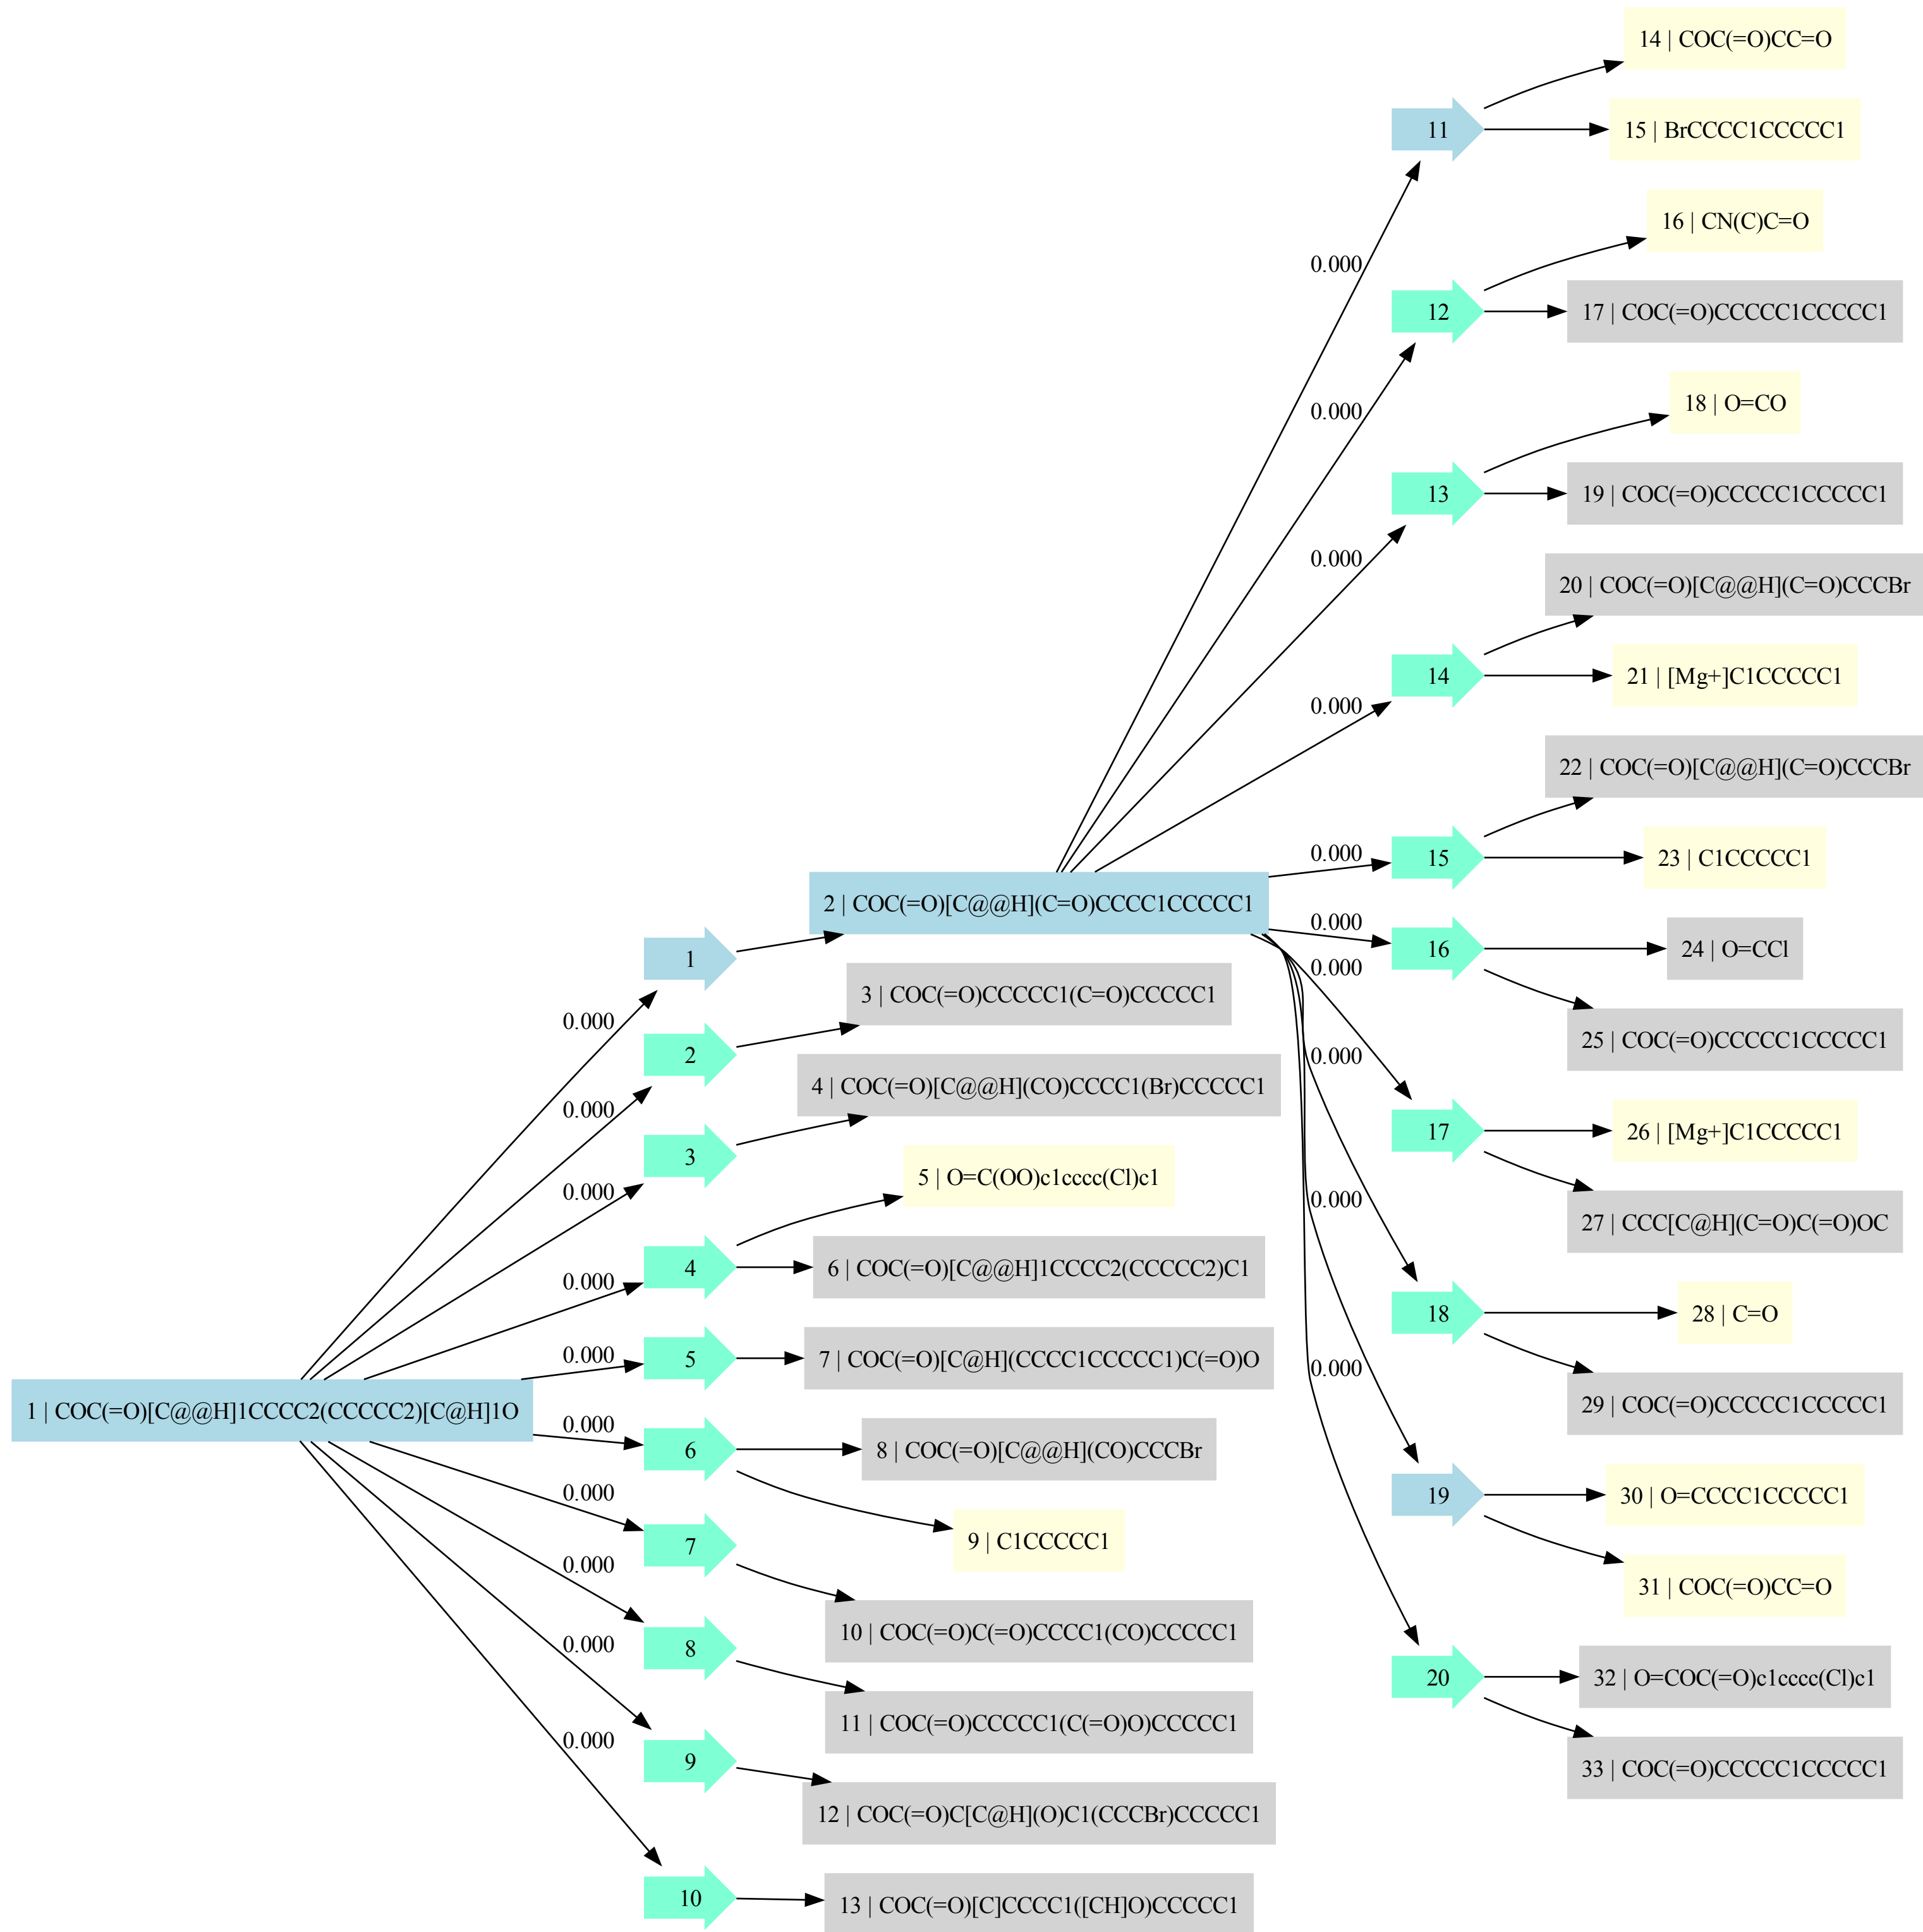

Supplement: supplementary_material [file mol_45_search_tree.pdf › materials9084/retro190_solutions/mol_45_search_tree.pdf]

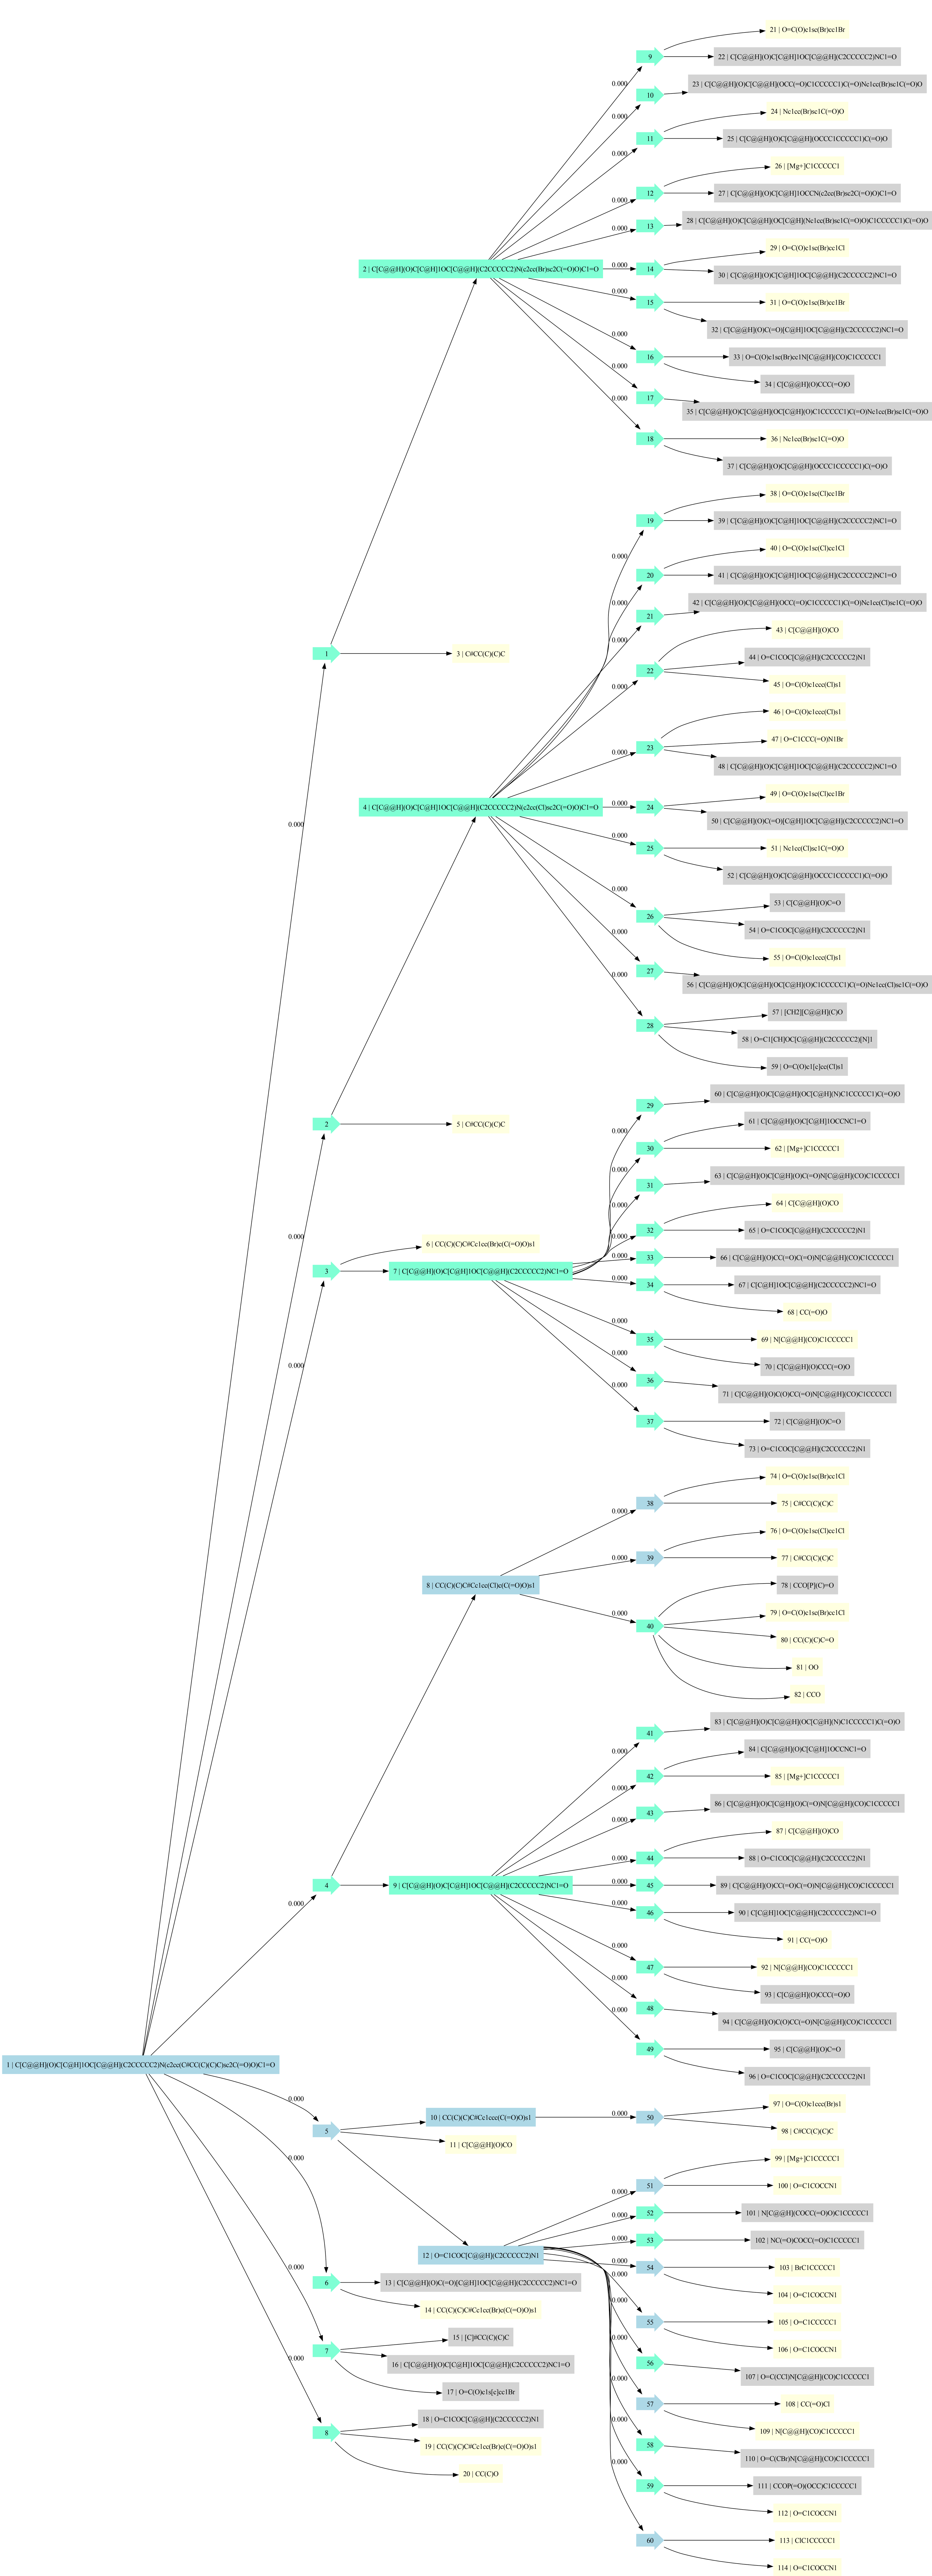

Supplement: supplementary_material [file mol_46_search_tree.pdf › materials9084/retro190_solutions/mol_46_search_tree.pdf]

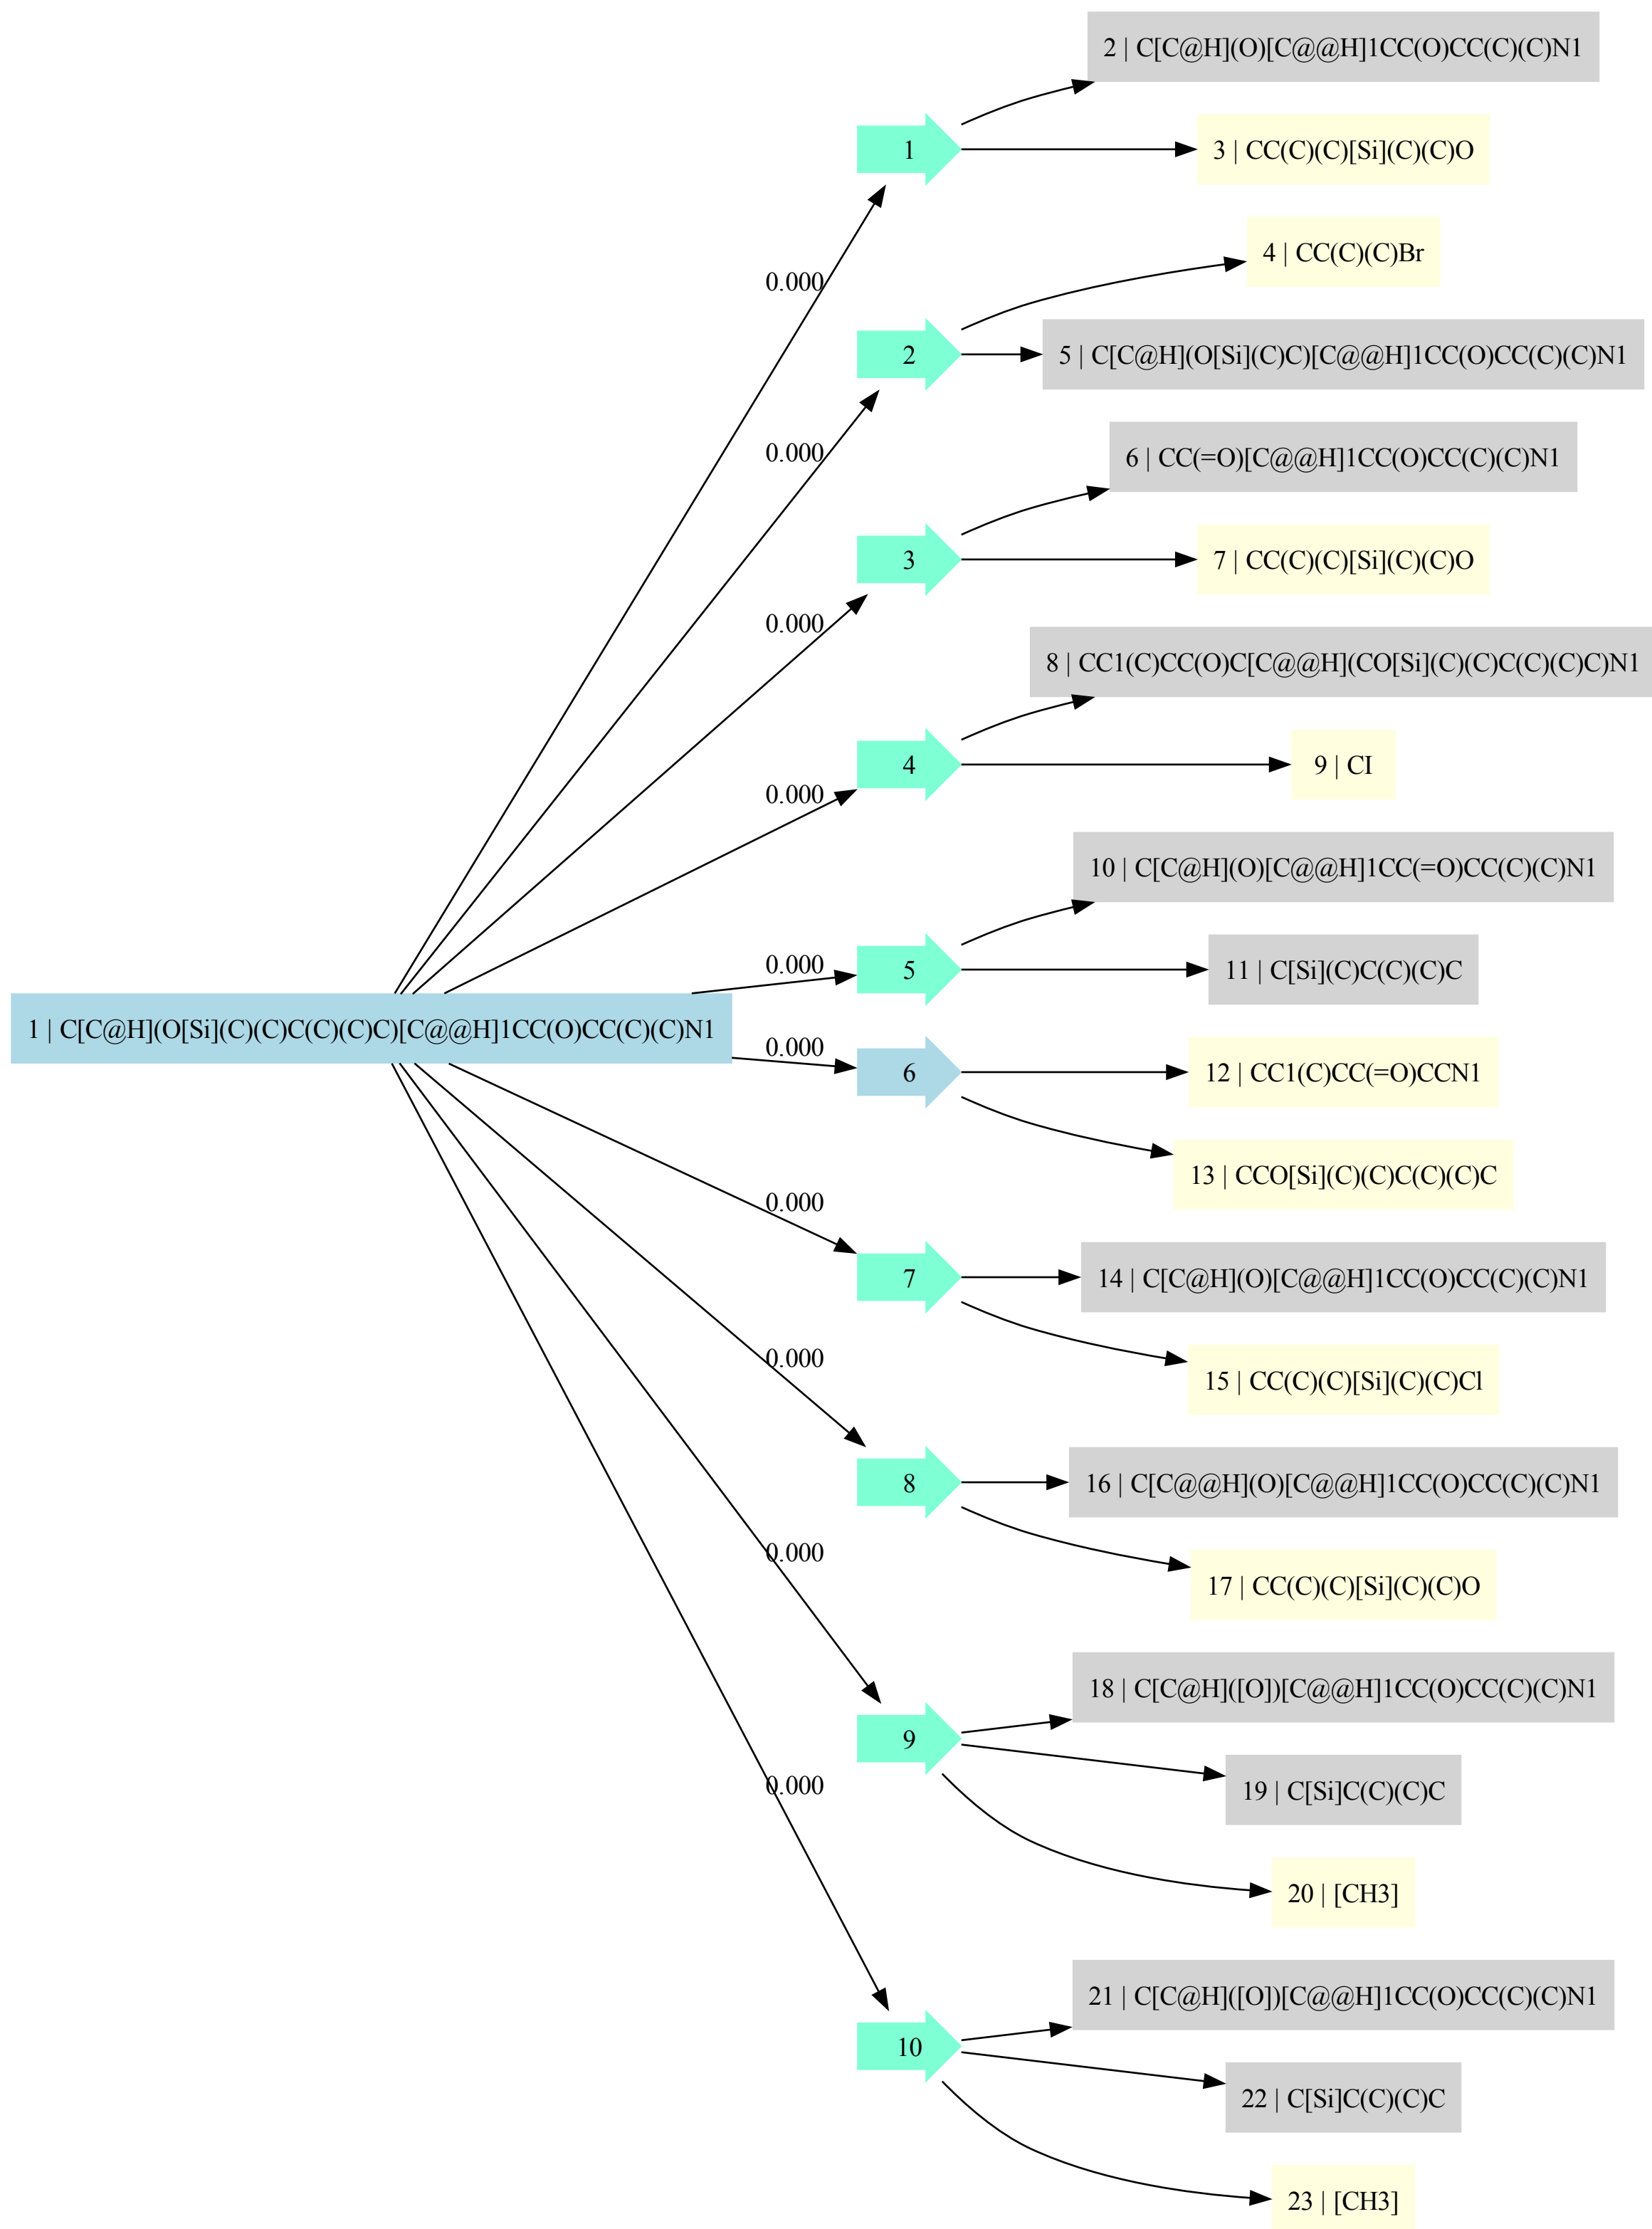

Supplement: supplementary_material [file mol_47_search_tree.pdf › materials9084/retro190_solutions/mol_47_search_tree.pdf]

Cc1ccn2cc(CO)n(-c3ccccc3)c(=O)c12

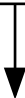

Cc1ccn(C=C(CO)Nc2ccccc2)c1C(=O)O

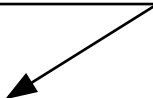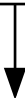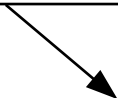

Cc1cc[nH]c1C(=O)O

CCCO

Nc1ccccc1

Supplement: supplementary_material [file mol_48_route_optimal.pdf › materials9084/retro190_solutions/mol_48_route_optimal.pdf]

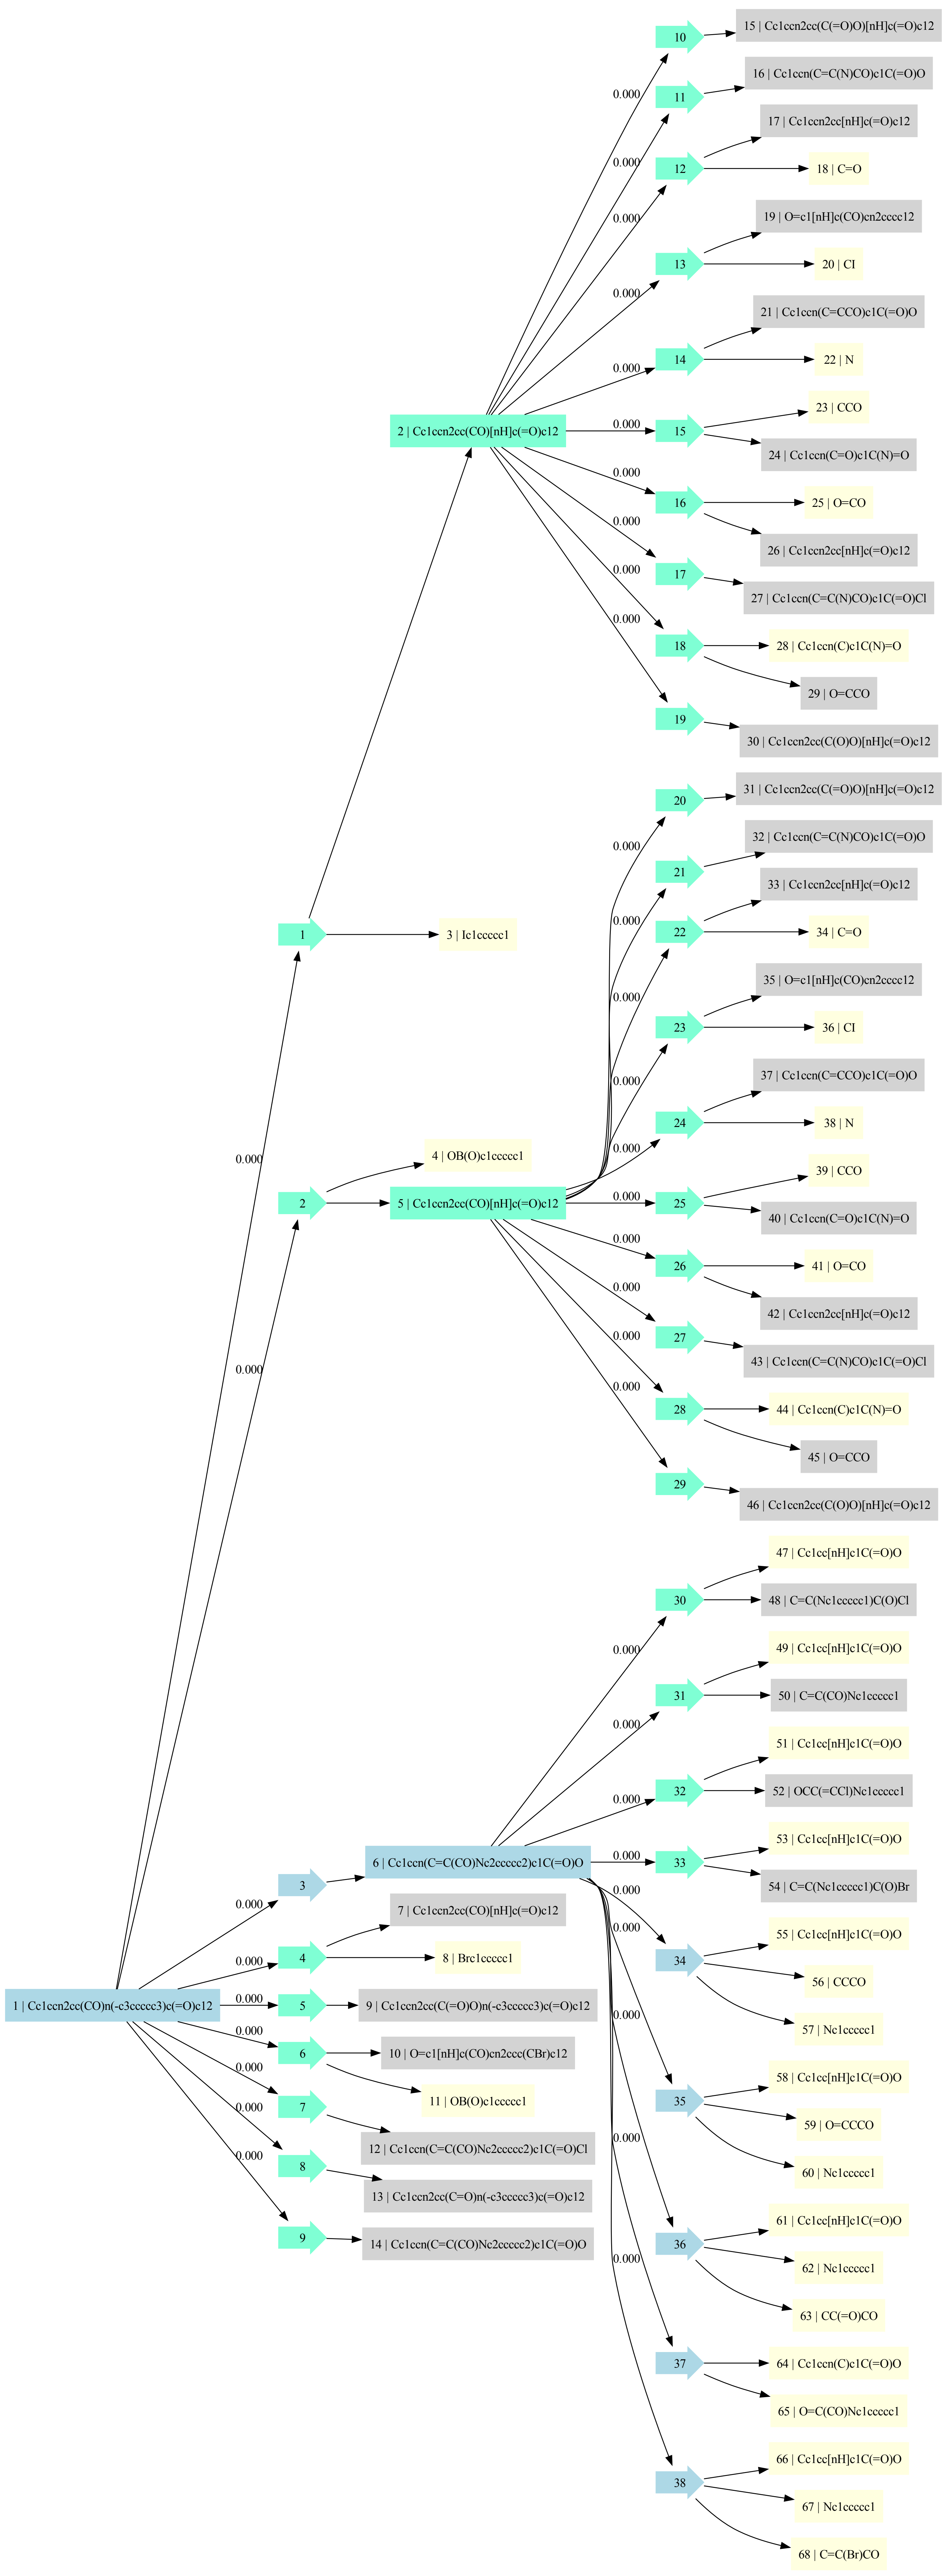

Supplement: supplementary_material [file mol_48_search_tree.pdf › materials9084/retro190_solutions/mol_48_search_tree.pdf]

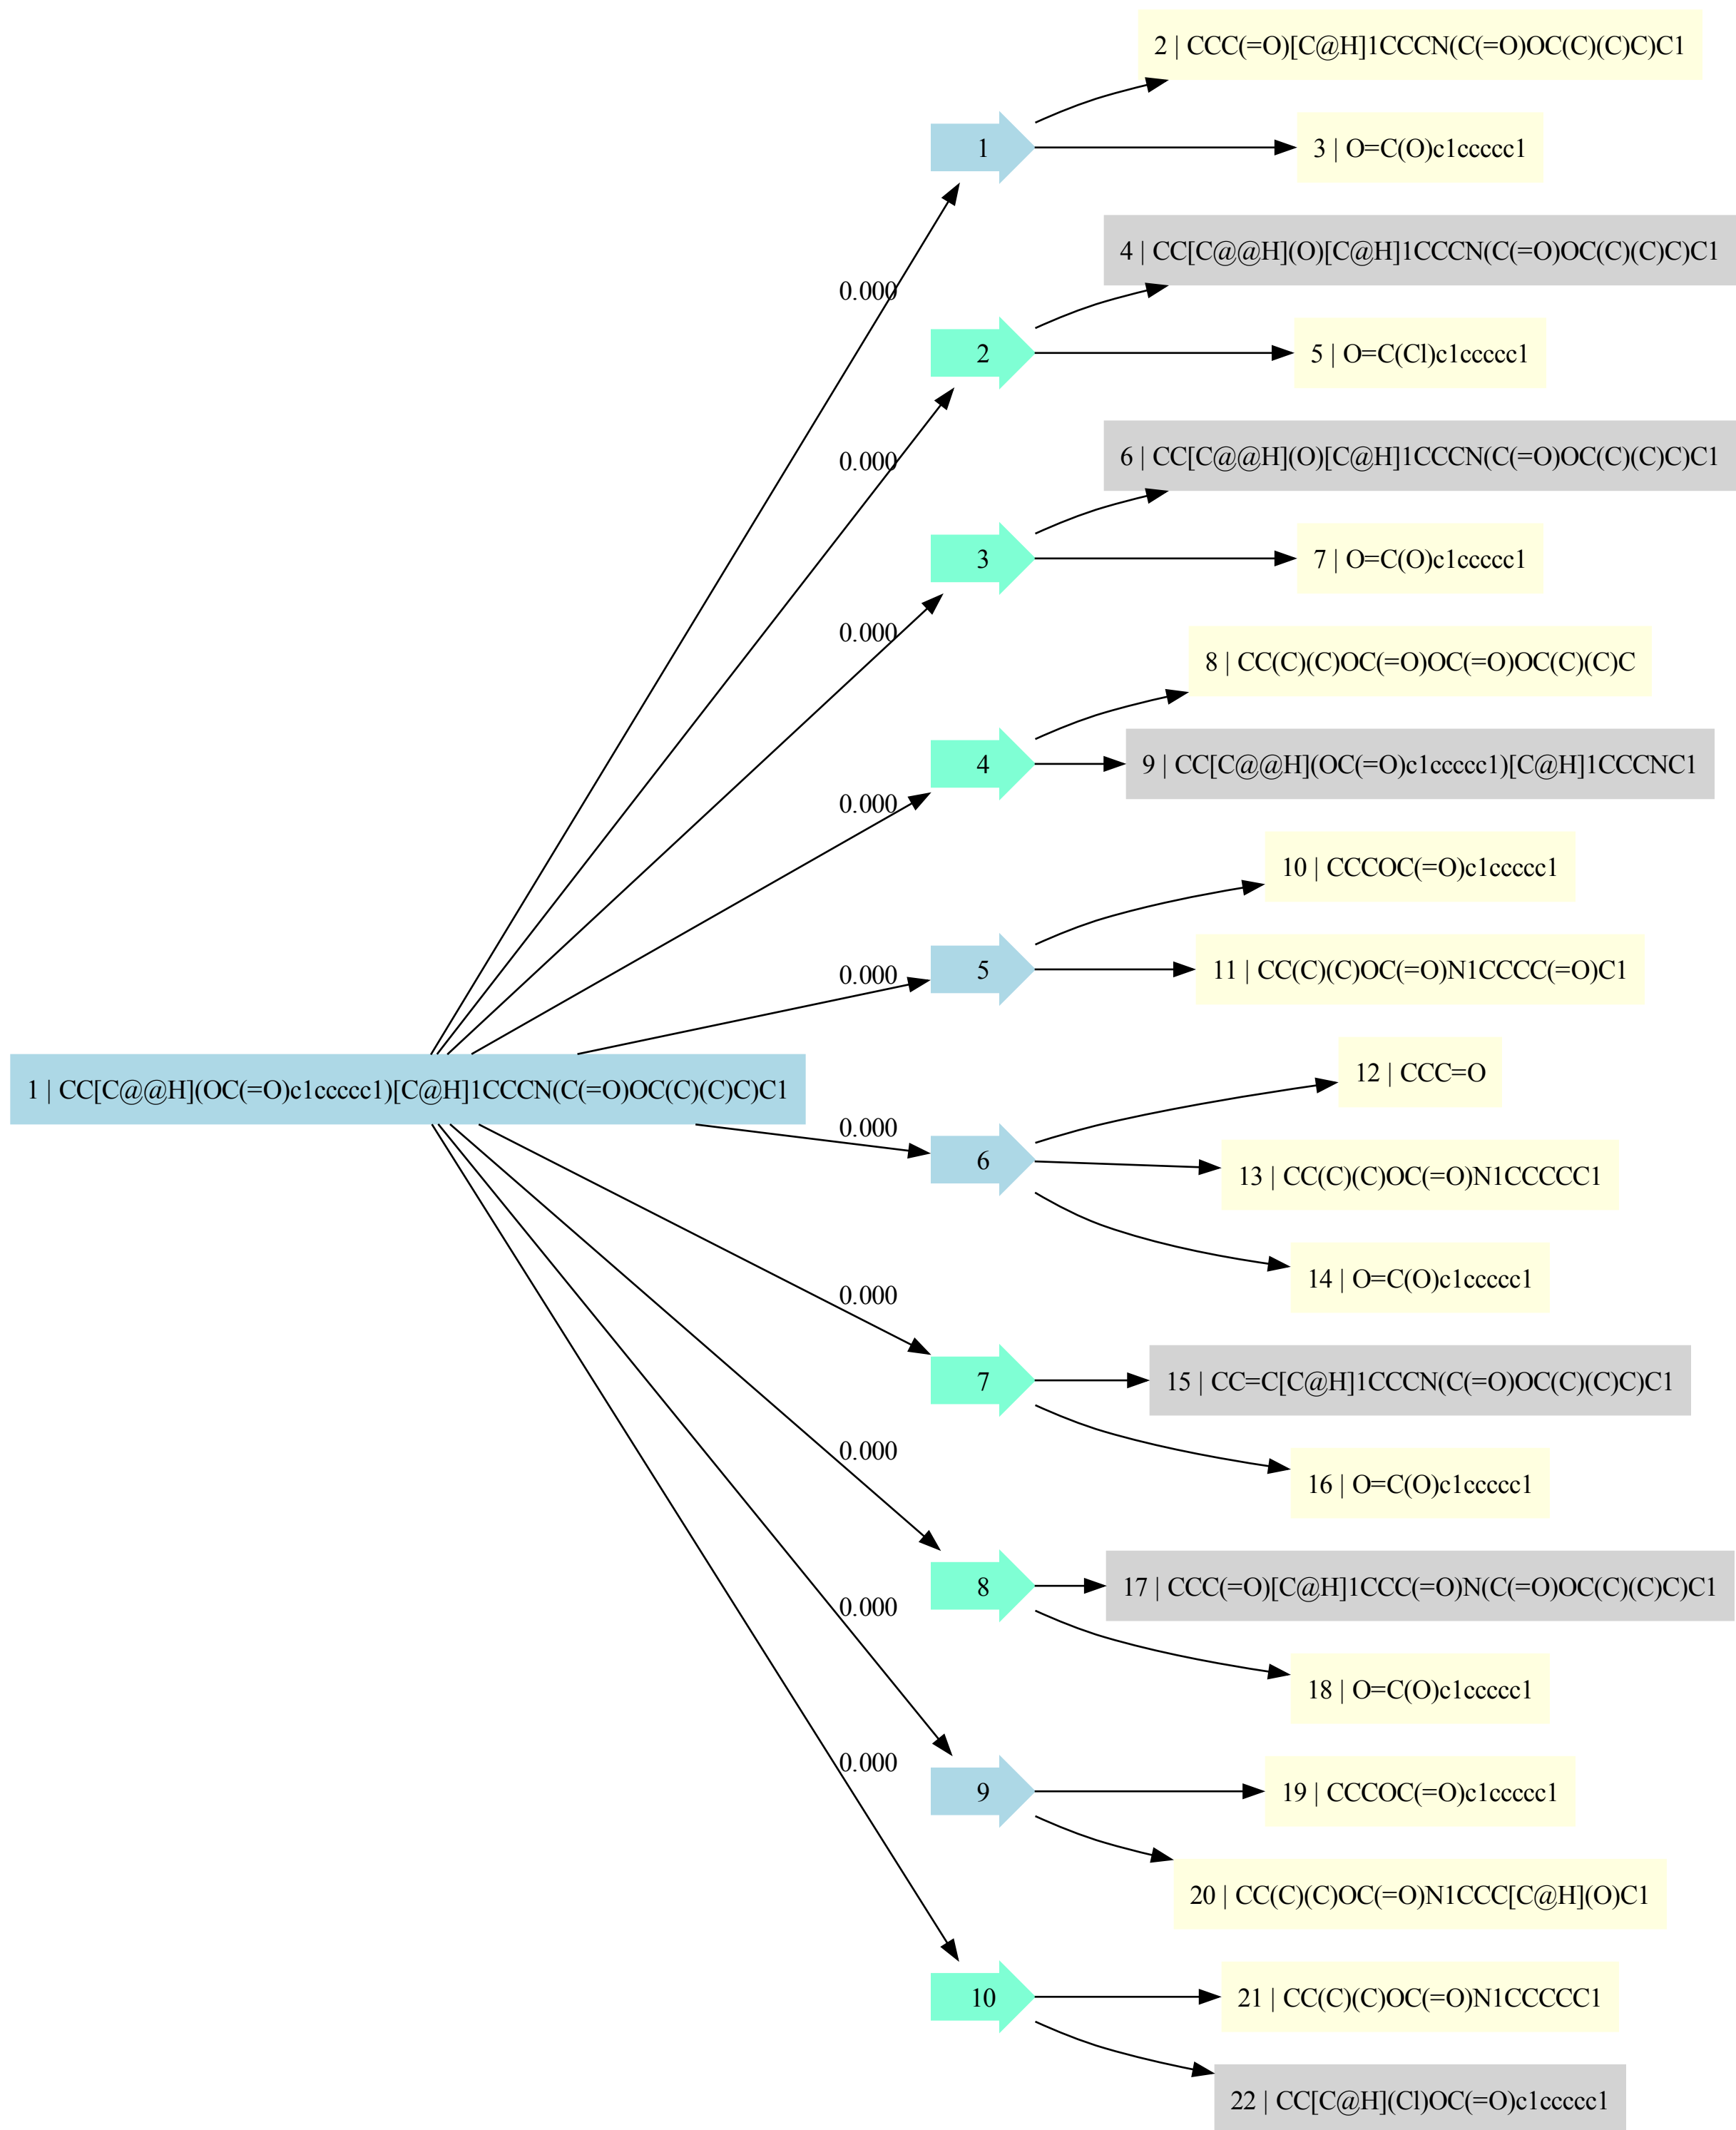

Supplement: supplementary_material [file mol_49_search_tree.pdf › materials9084/retro190_solutions/mol_49_search_tree.pdf]

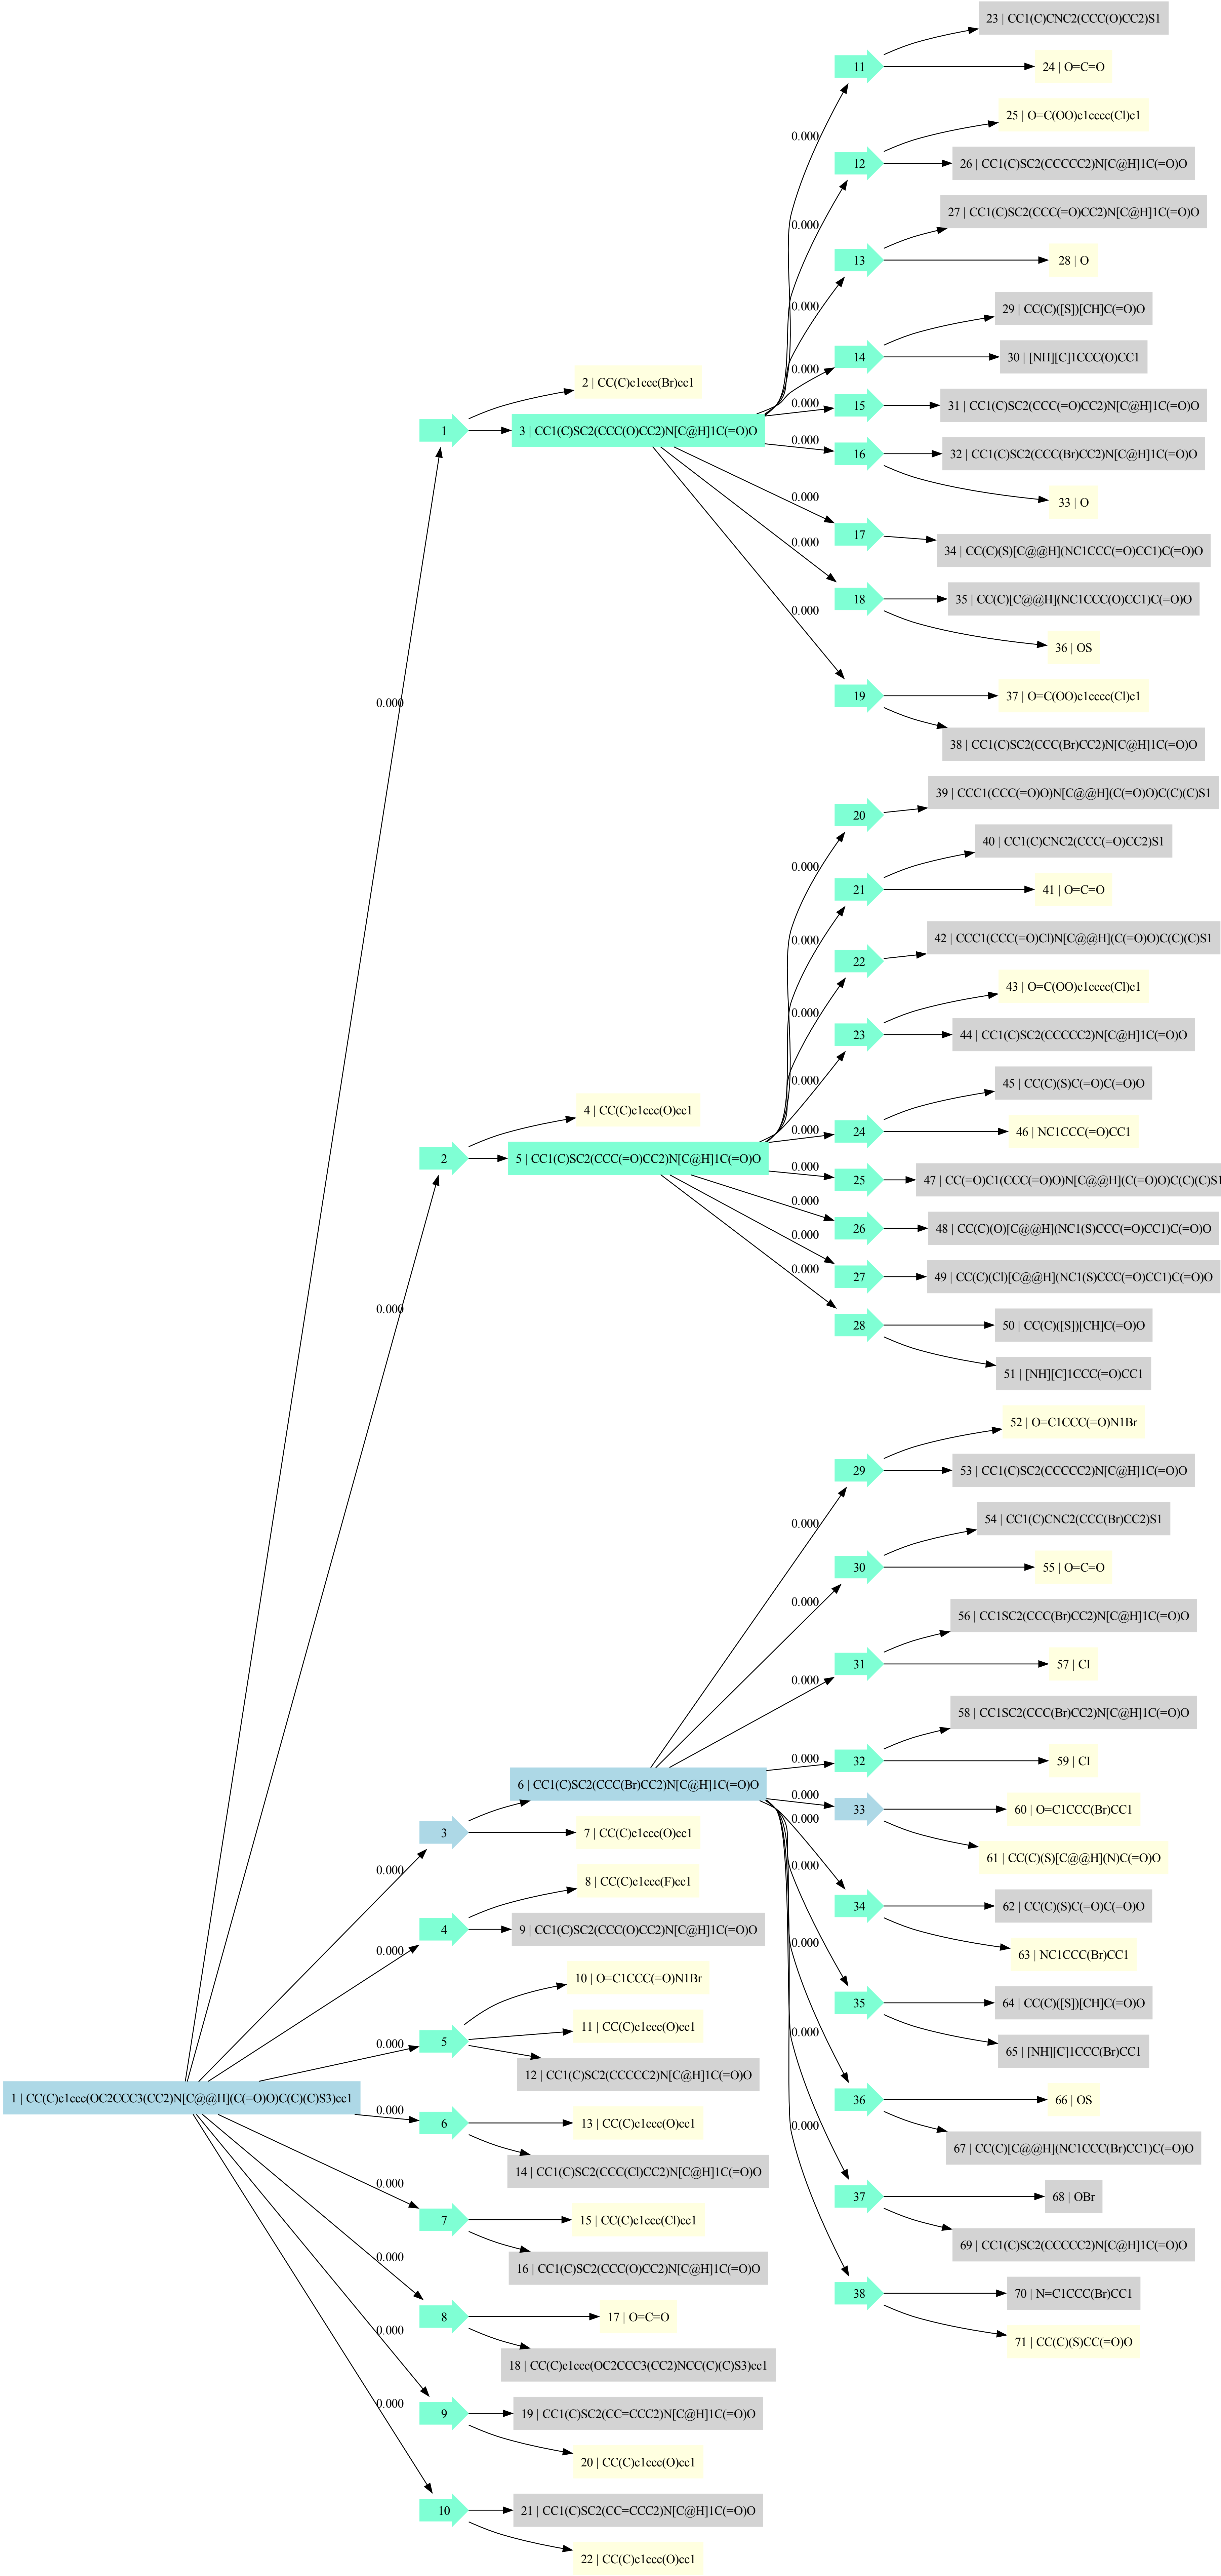

Supplement: supplementary_material [file mol_50_search_tree.pdf › materials9084/retro190_solutions/mol_50_search_tree.pdf]

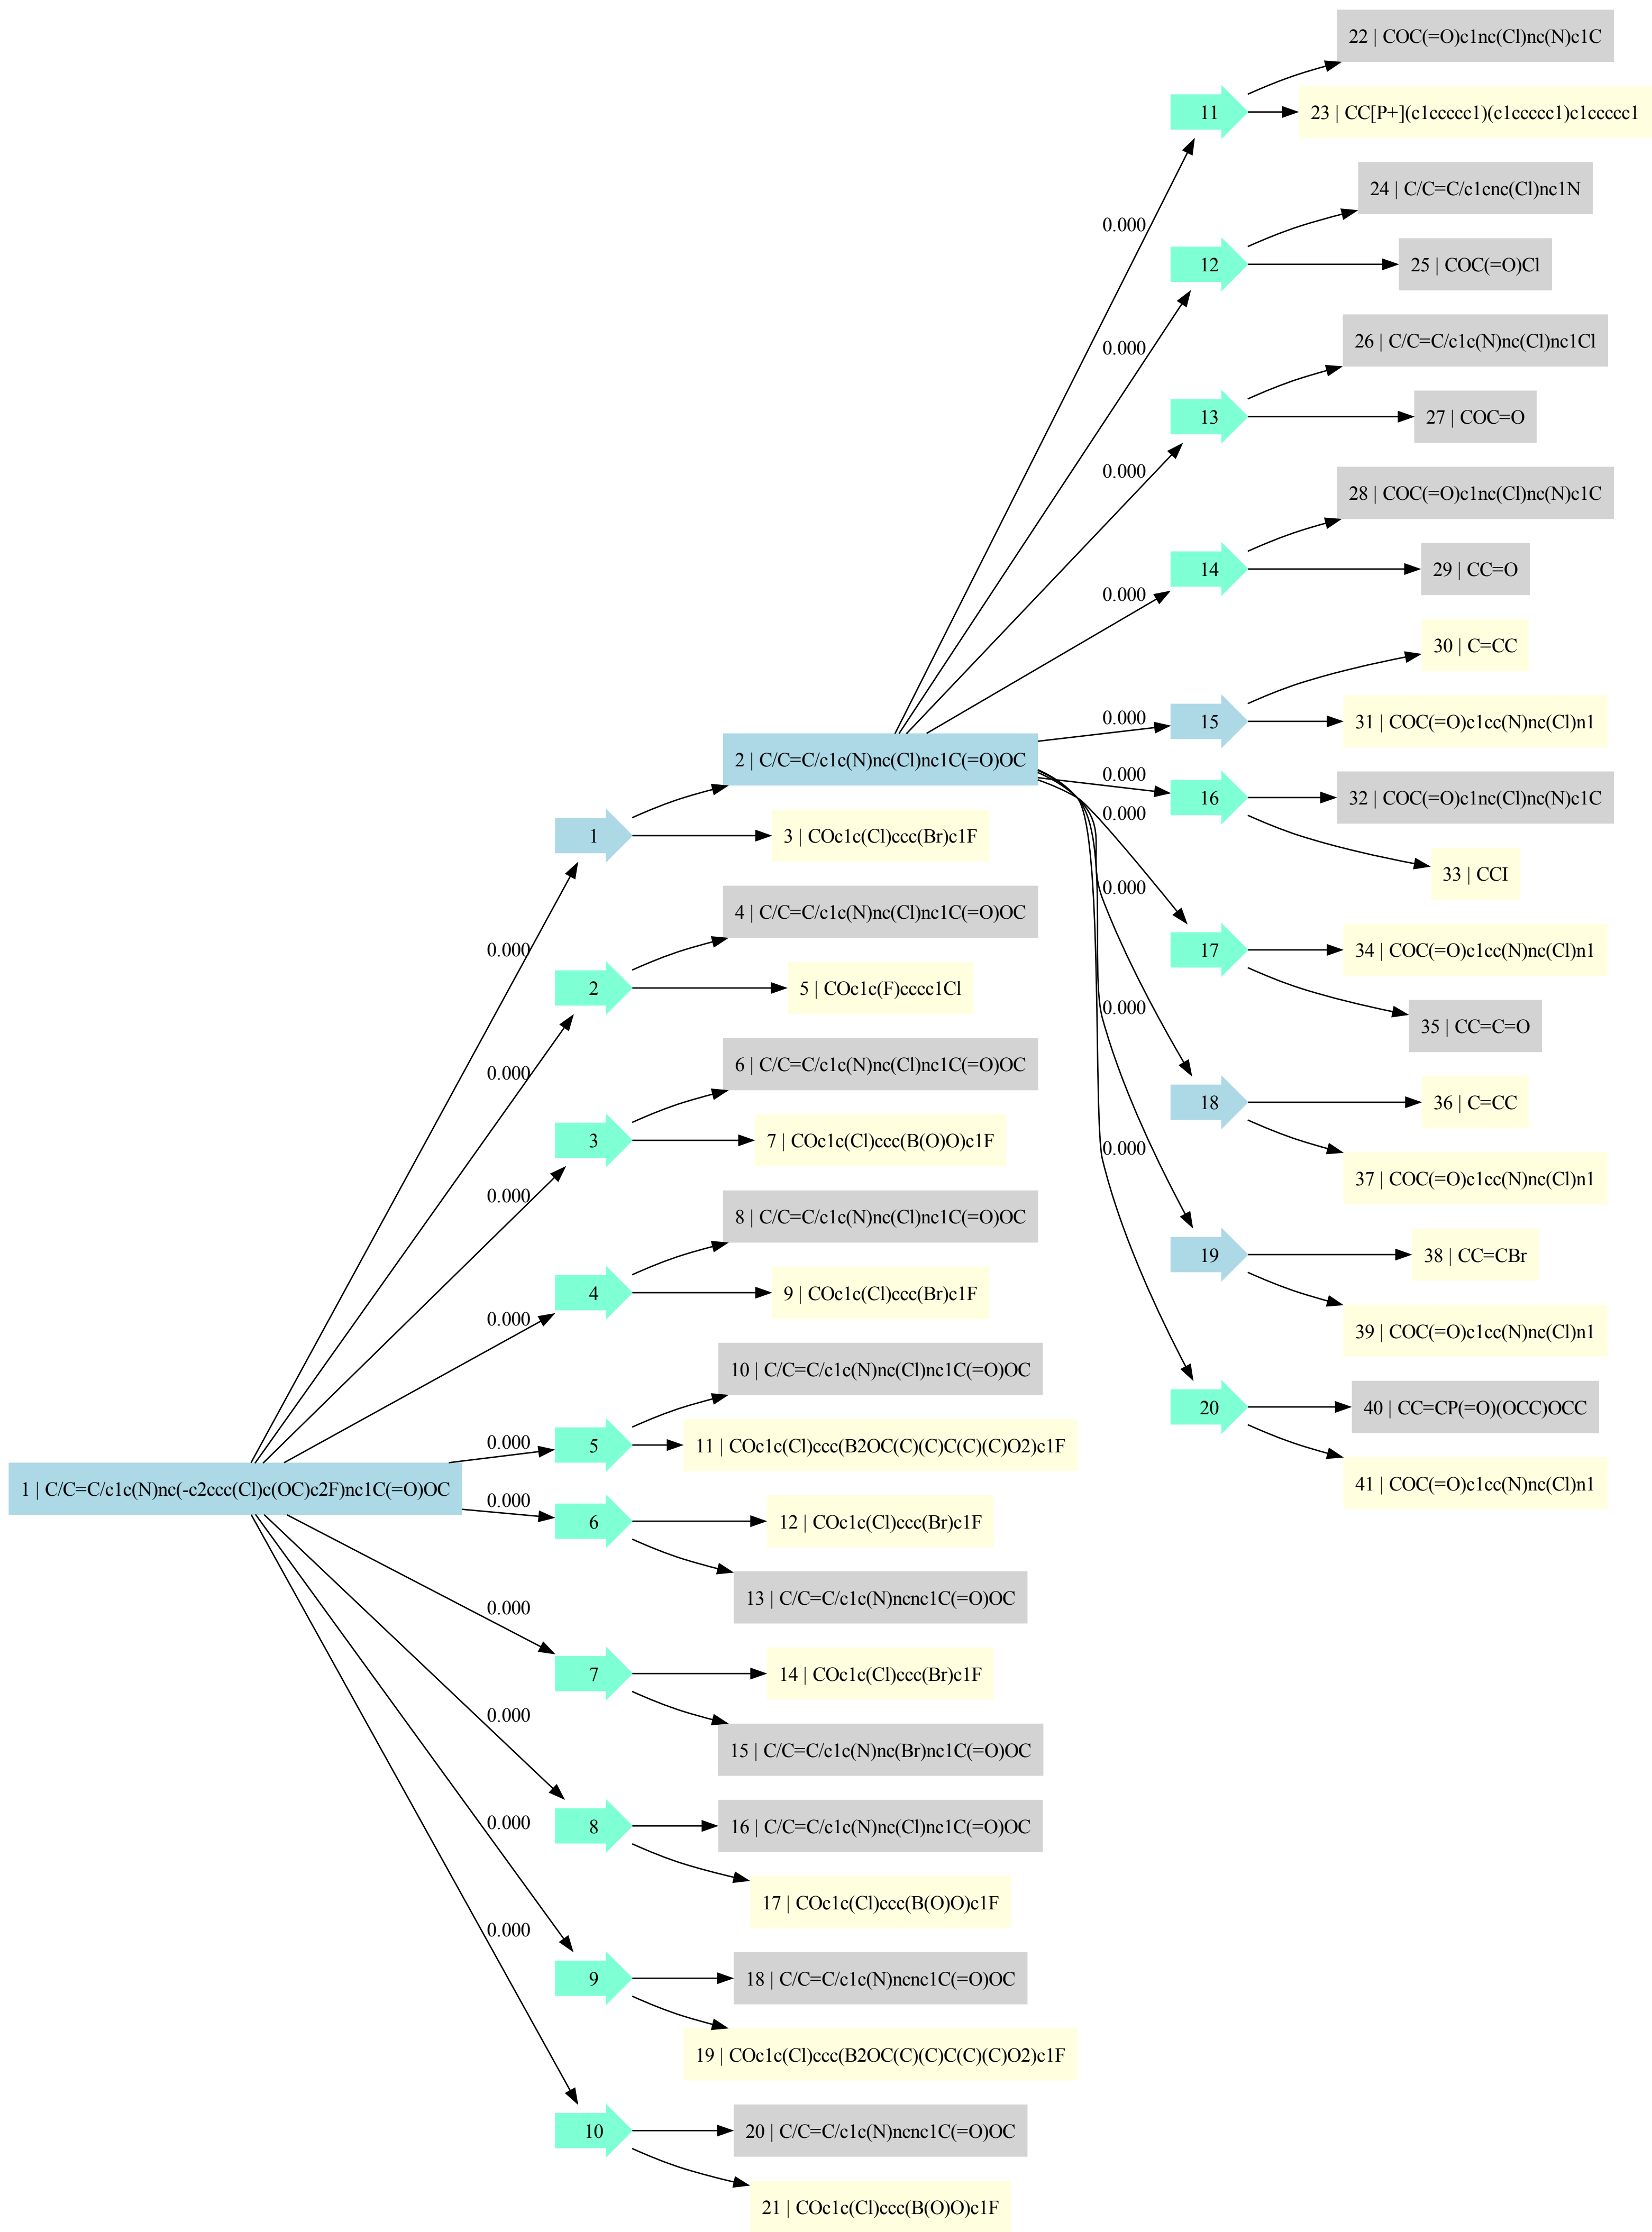

Supplement: supplementary_material [file mol_51_search_tree.pdf › materials9084/retro190_solutions/mol_51_search_tree.pdf]

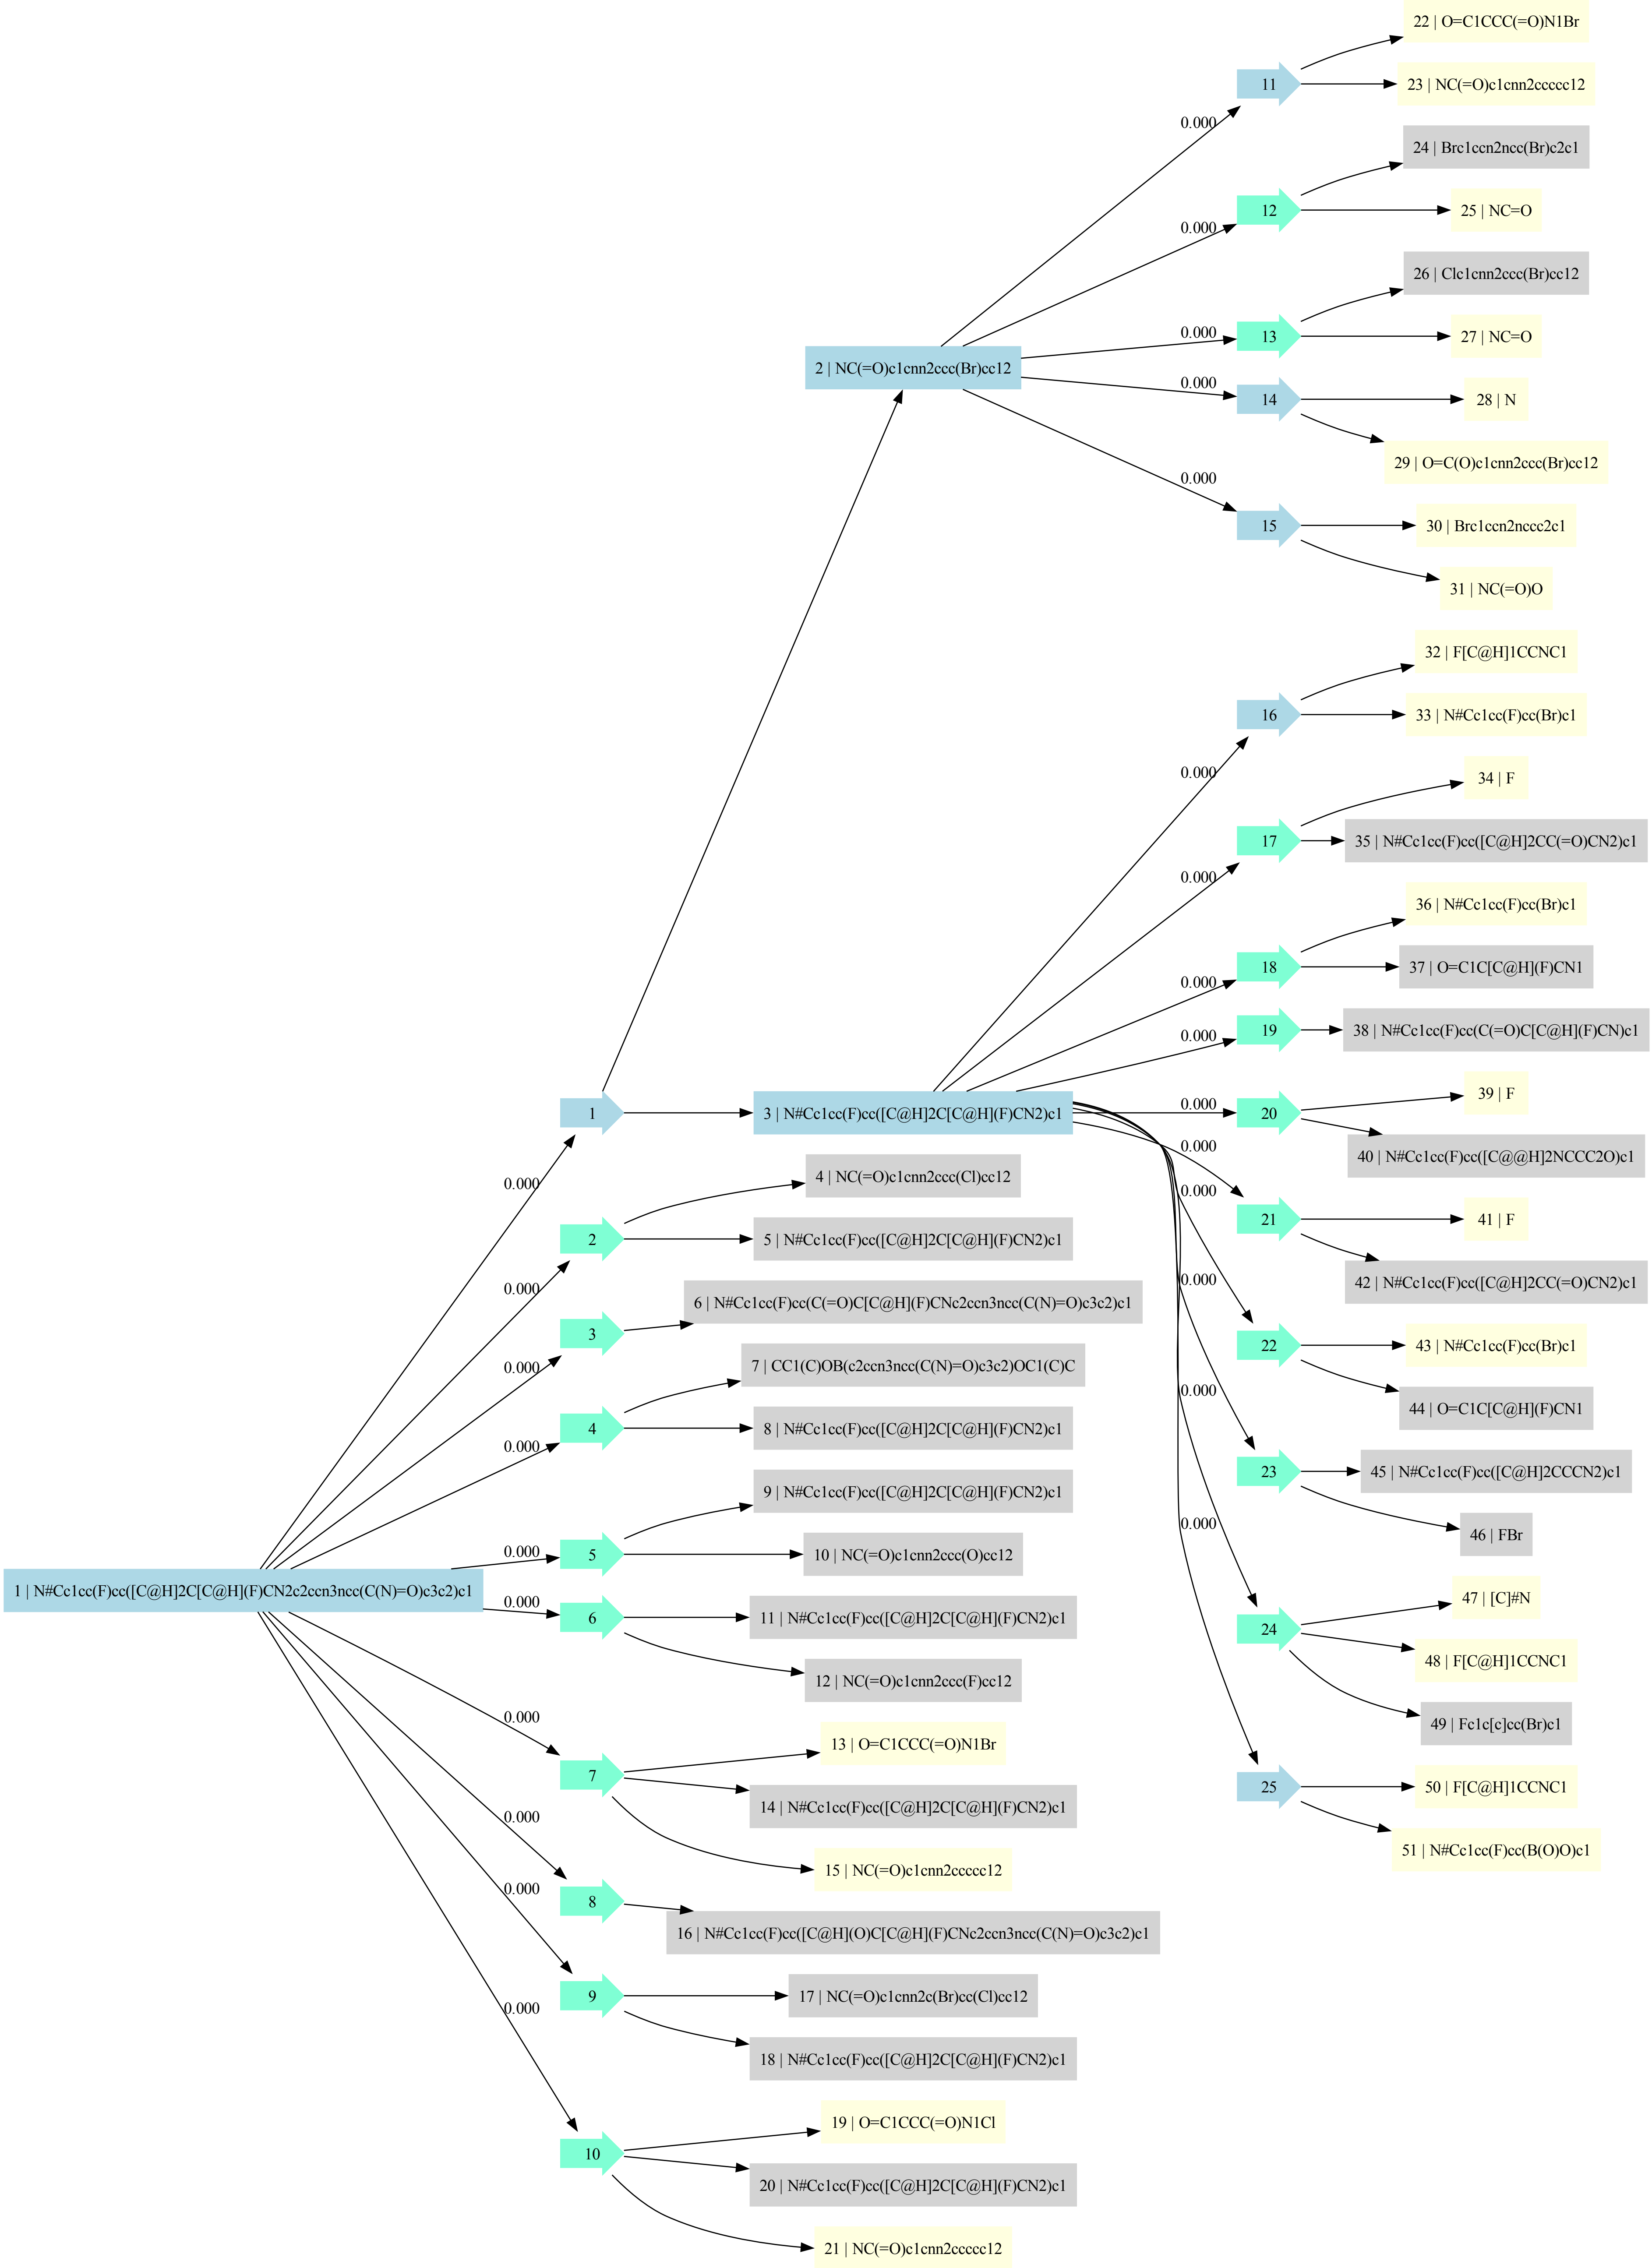

Supplement: supplementary_material [file mol_52_search_tree.pdf › materials9084/retro190_solutions/mol_52_search_tree.pdf]

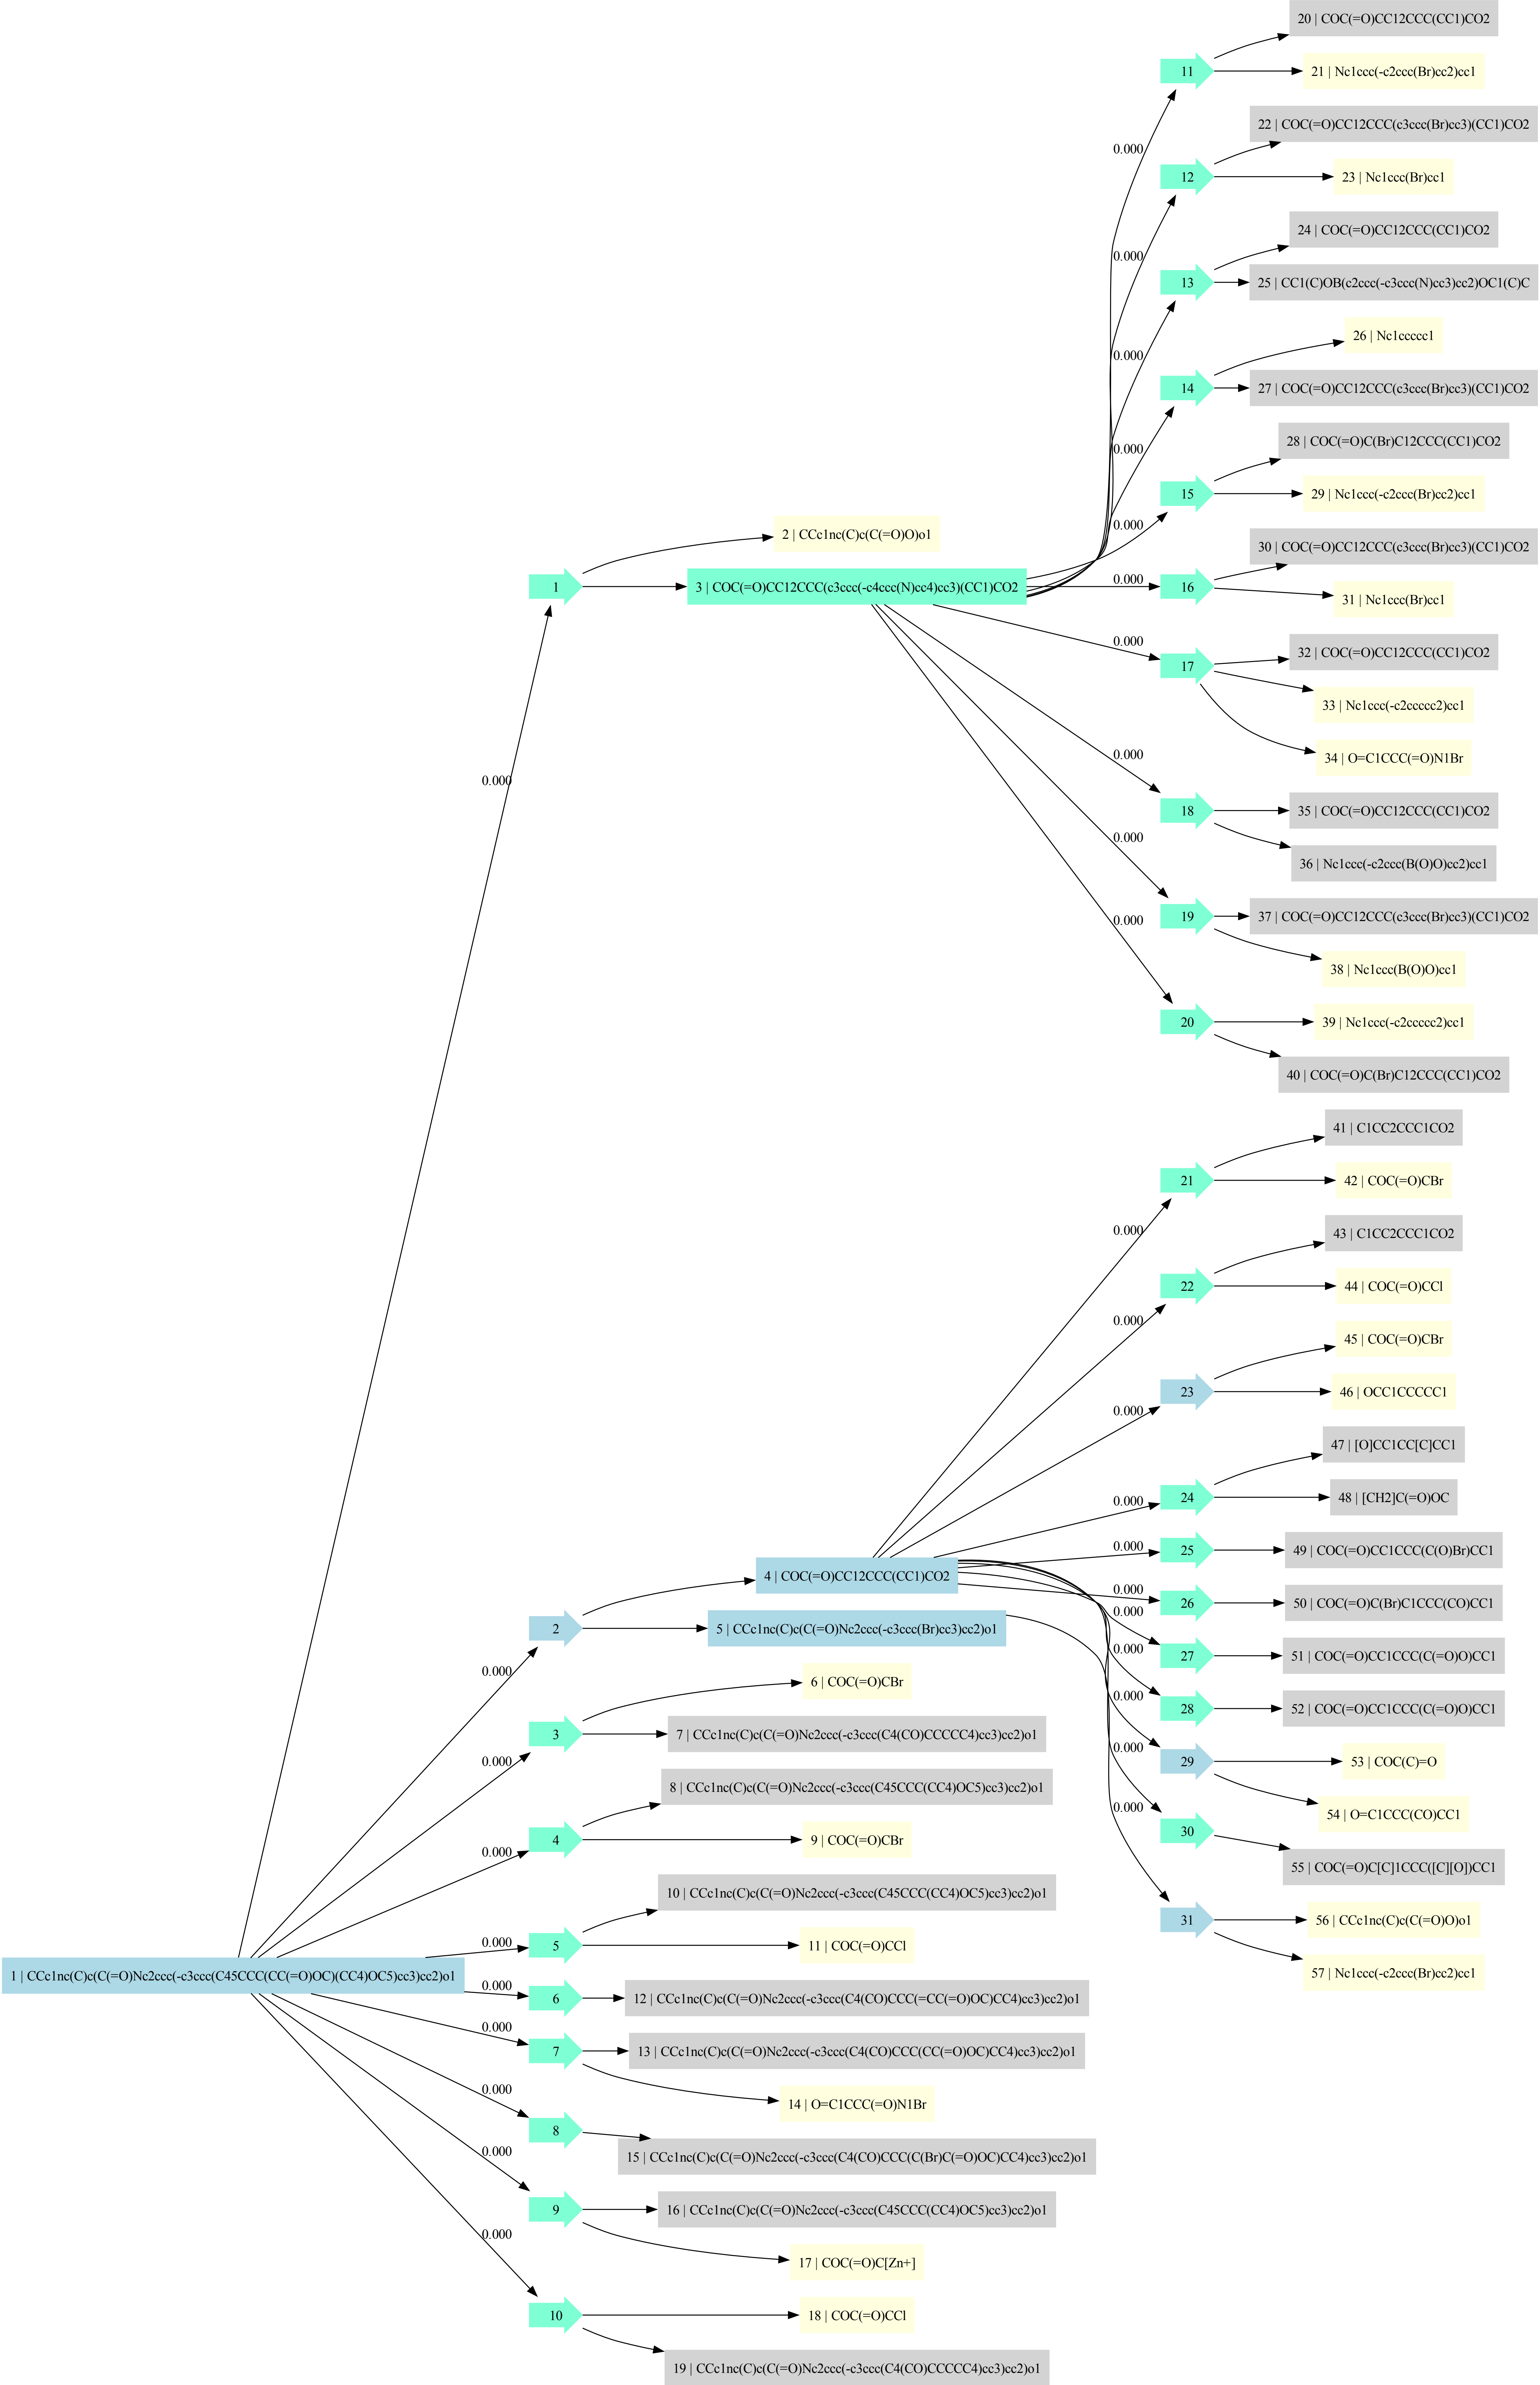

Supplement: supplementary_material [file mol_53_search_tree.pdf › materials9084/retro190_solutions/mol_53_search_tree.pdf]

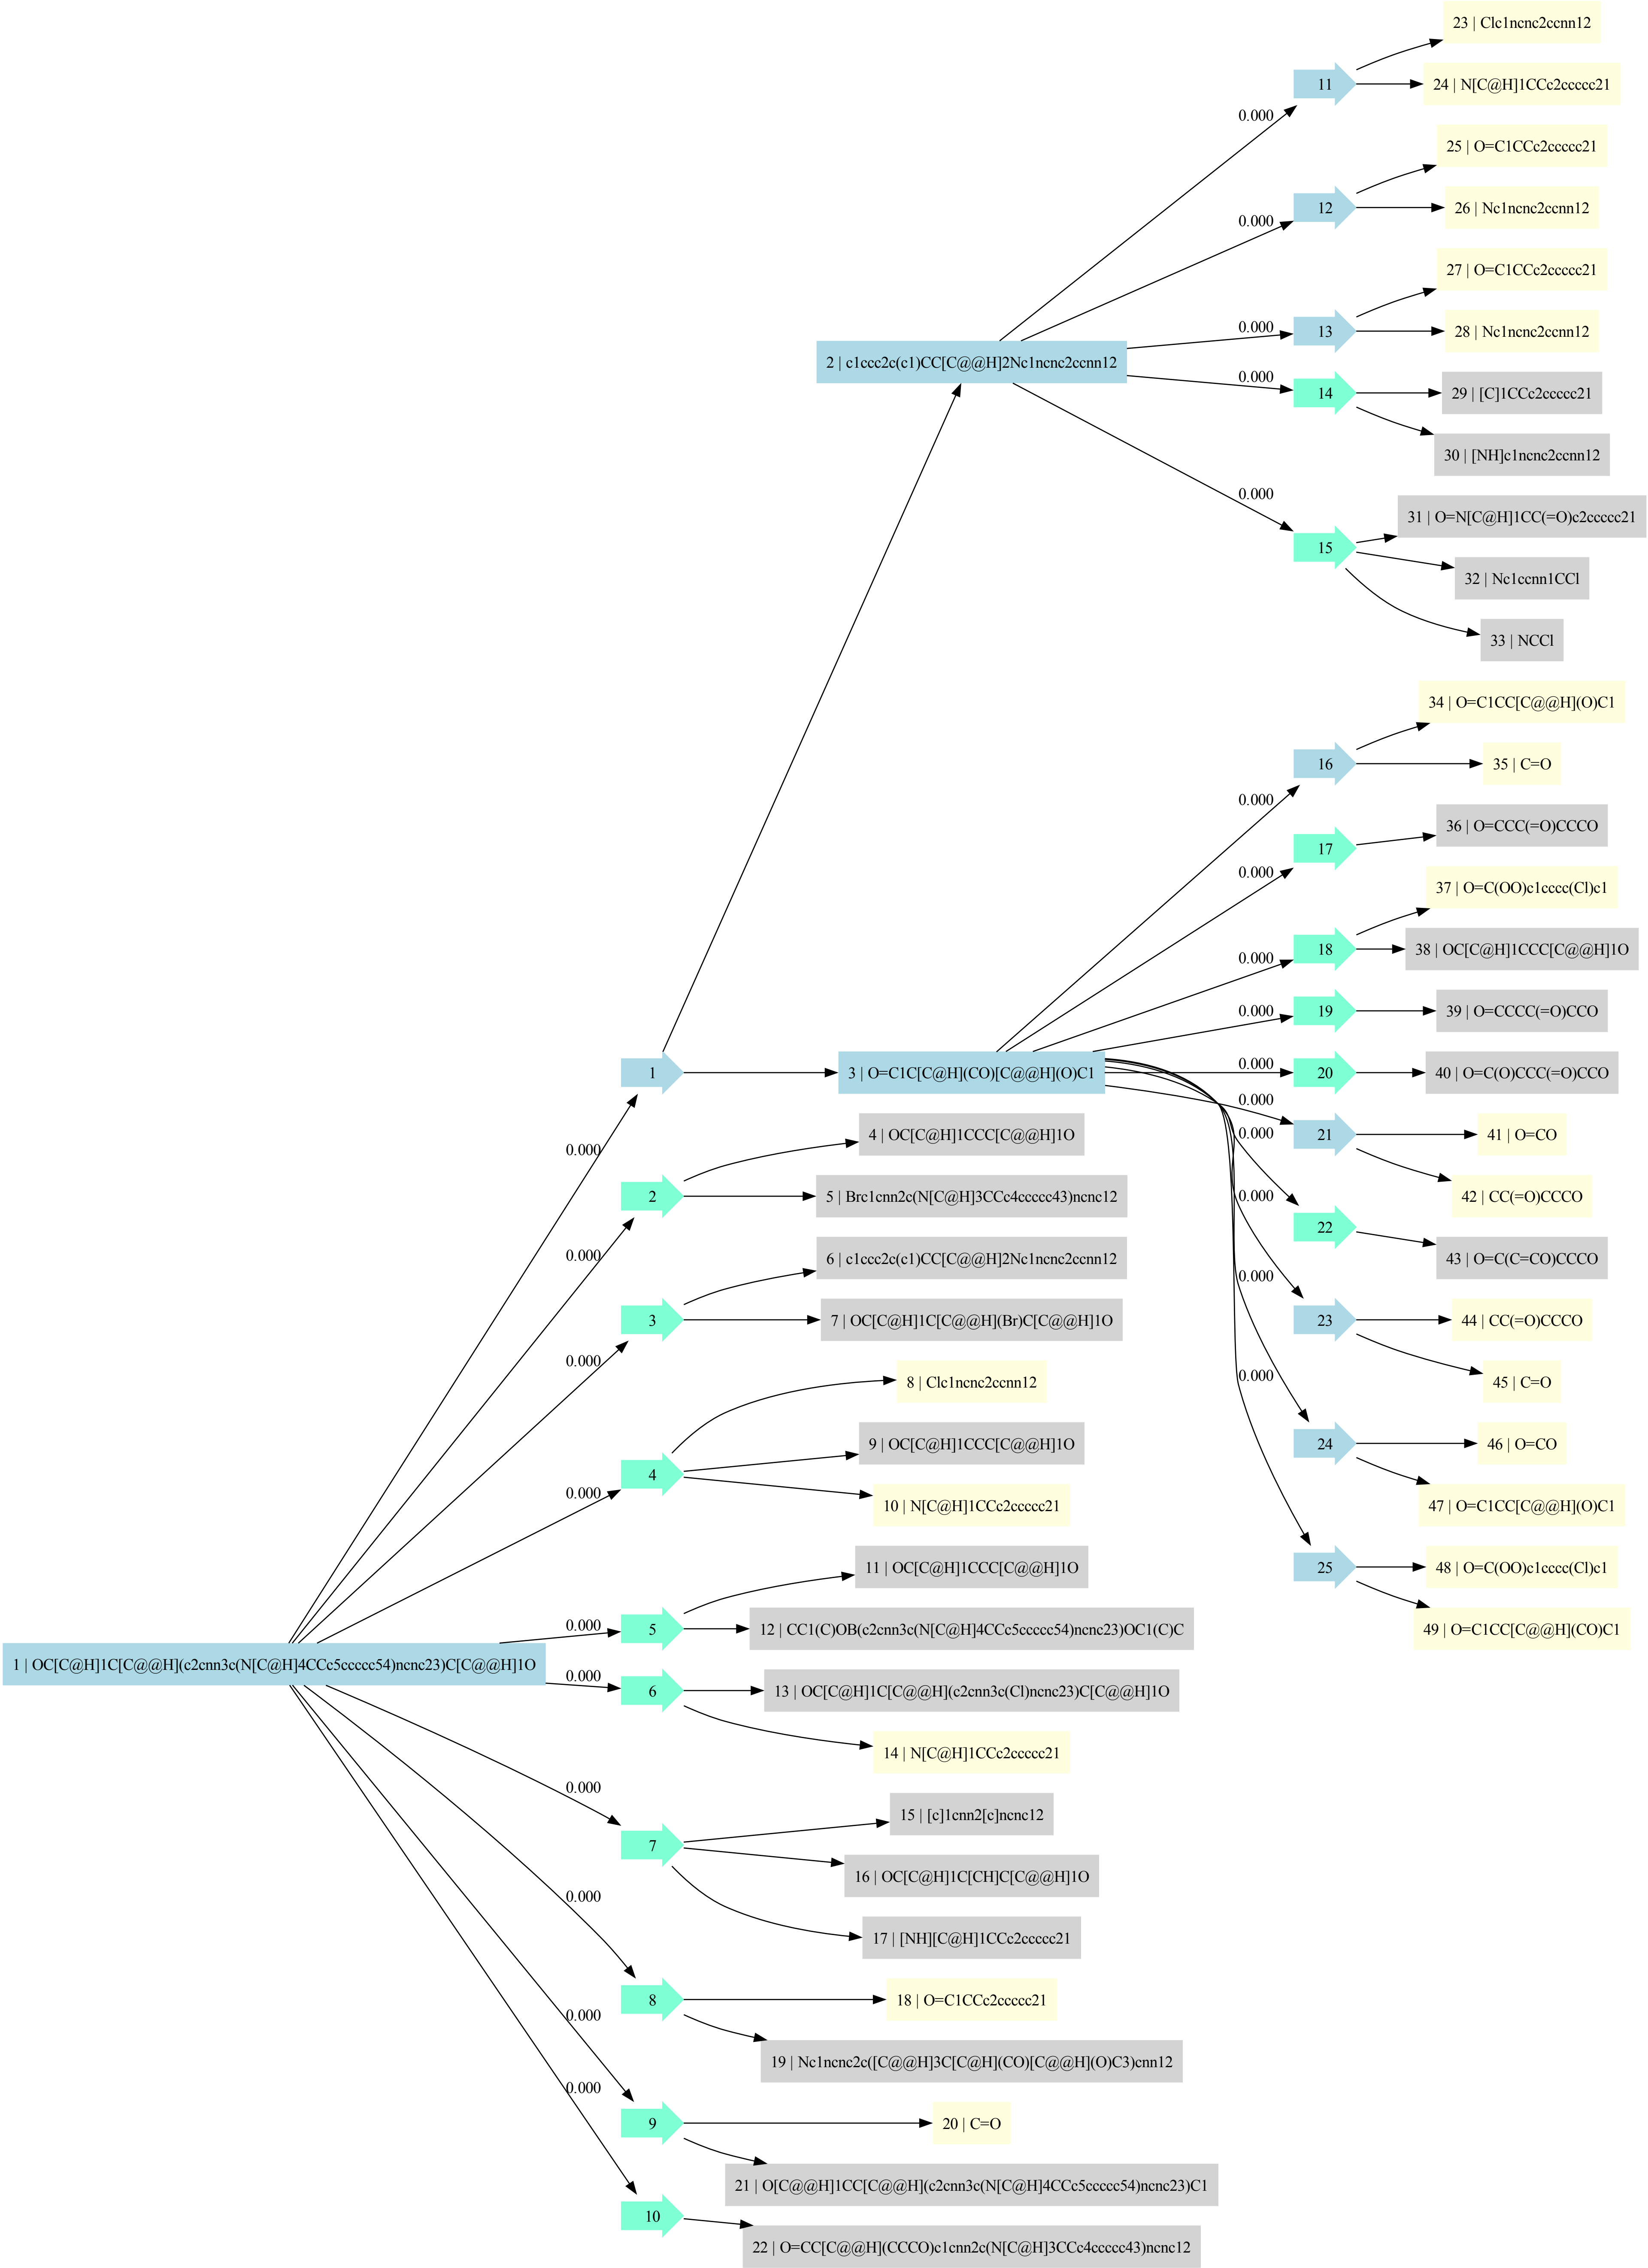

Supplement: supplementary_material [file mol_54_search_tree.pdf › materials9084/retro190_solutions/mol_54_search_tree.pdf]

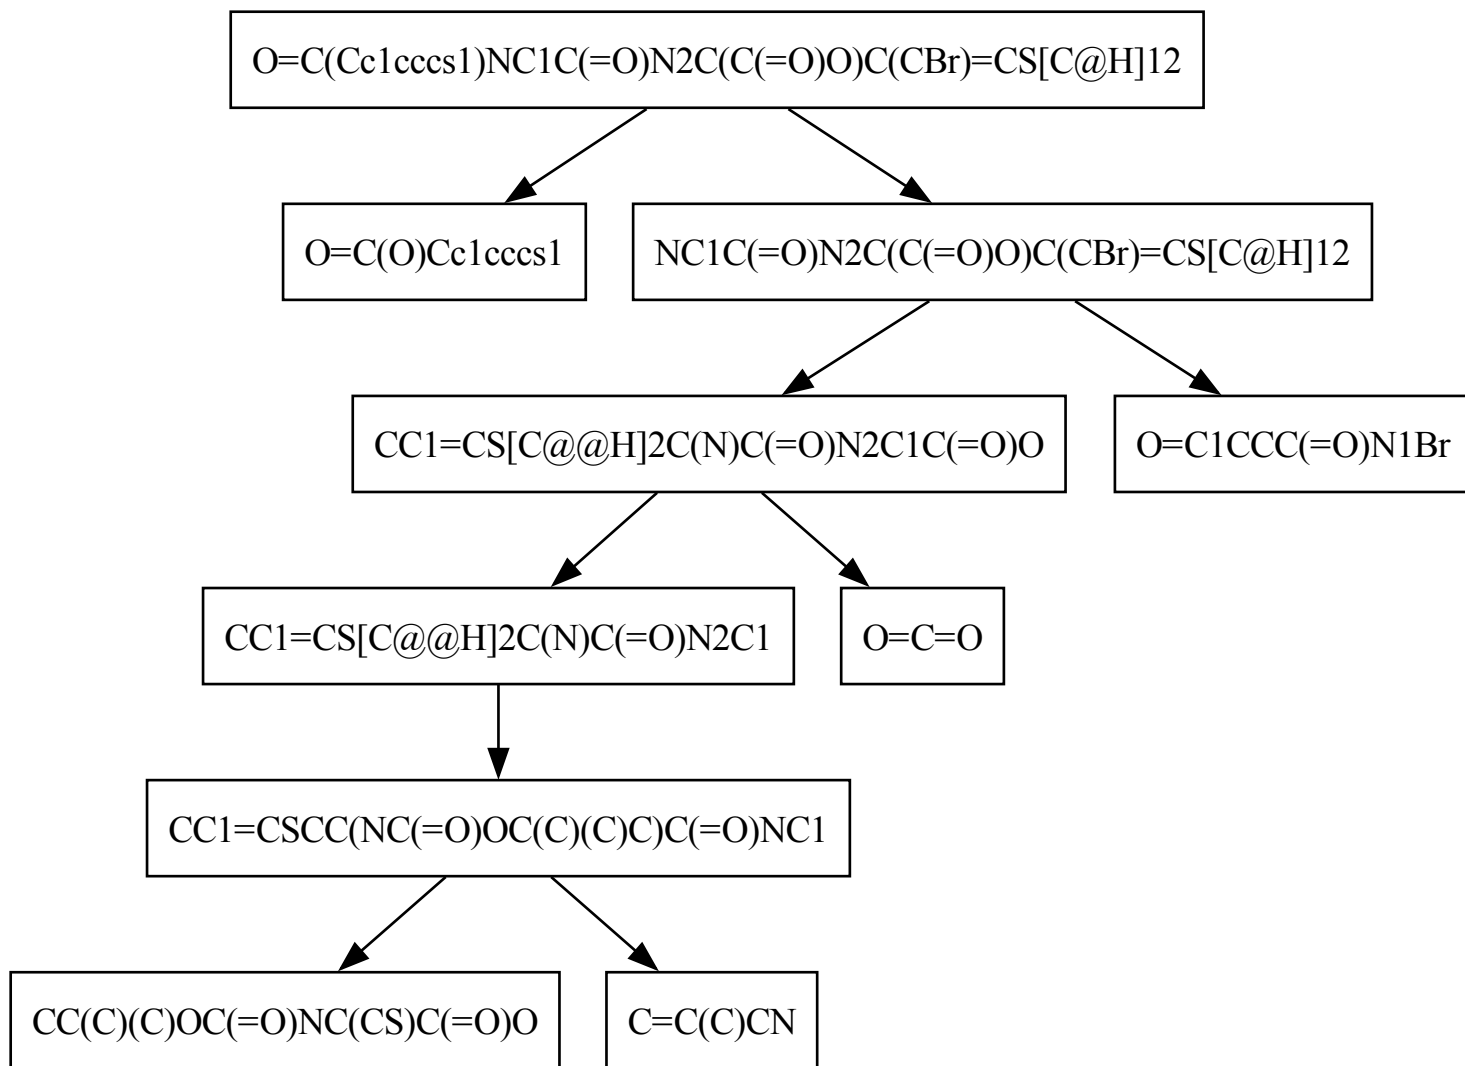

Supplement: supplementary_material [file mol_56_route_optimal.pdf › materials9084/retro190_solutions/mol_56_route_optimal.pdf]

NC1=Nc2ccc(F)cc2C2CCCC12

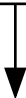

N=C(N)C1CCCC1c1cc(F)ccc1Br

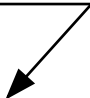

N=C(N)CCCCBr

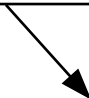

Cc1cc(F)ccc1Br

Supplement: supplementary_material [file mol_57_route_optimal.pdf › materials9084/retro190_solutions/mol_57_route_optimal.pdf]

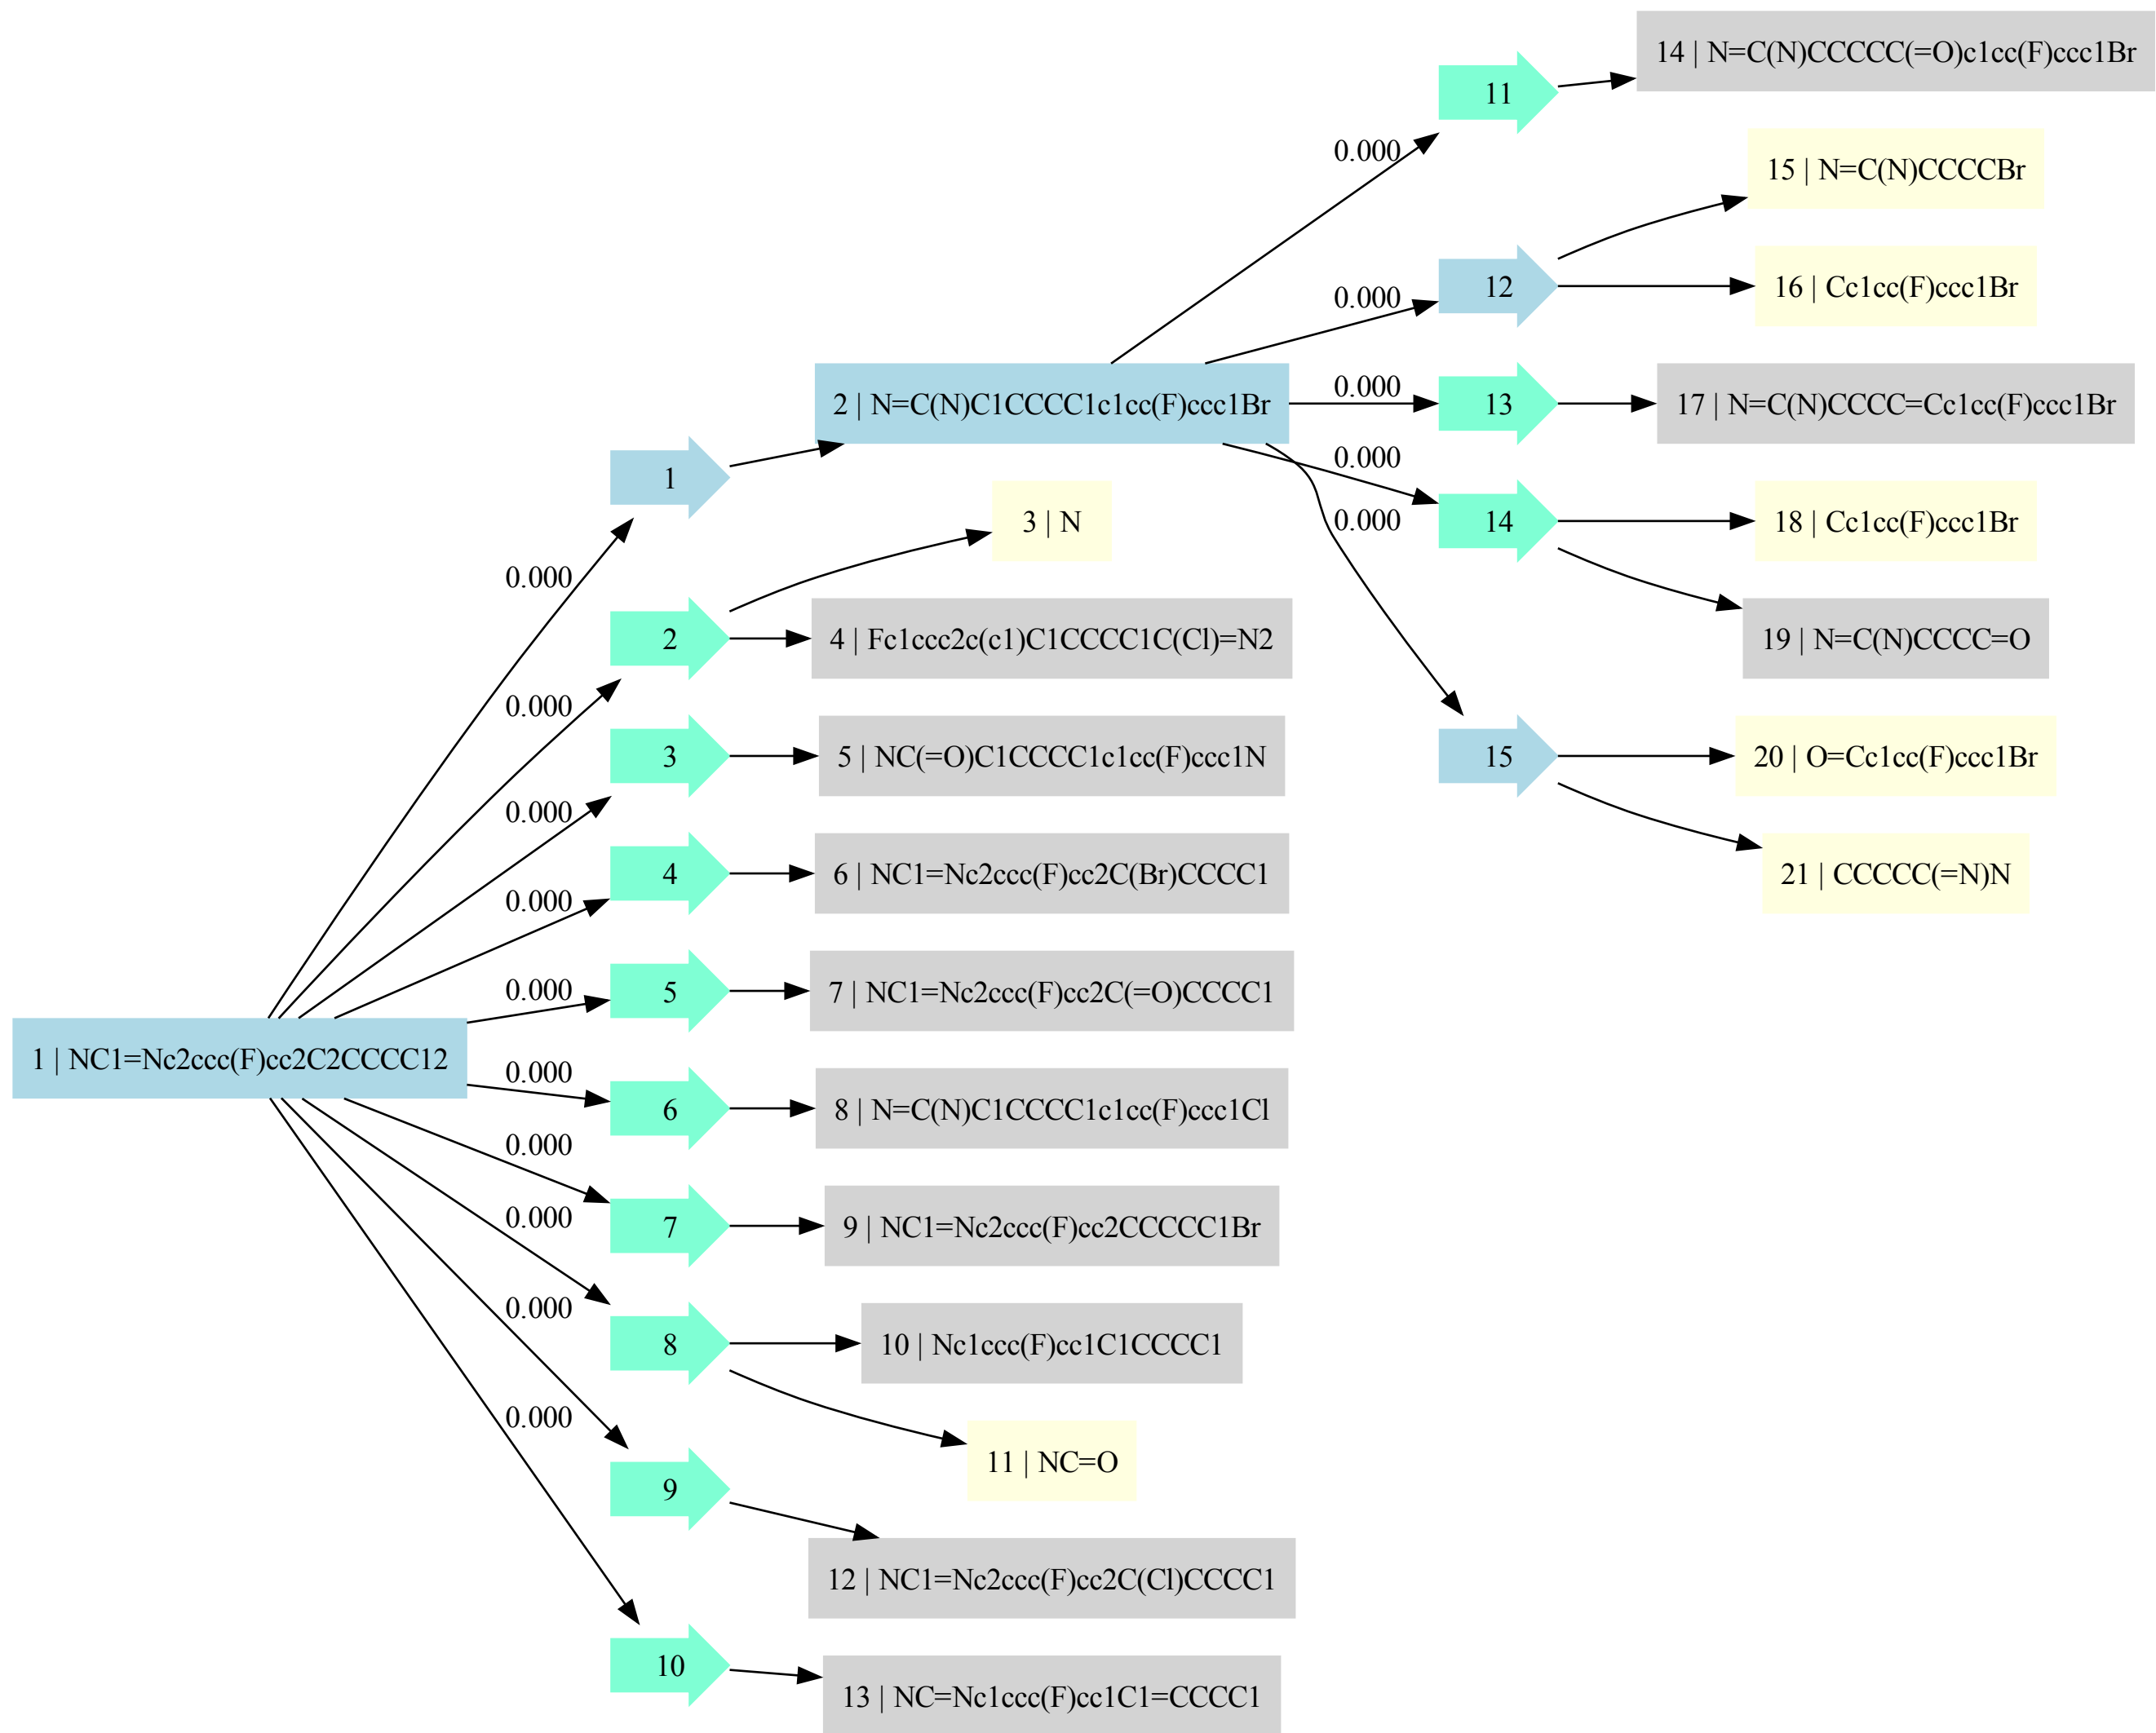

Supplement: supplementary_material [file mol_57_search_tree.pdf › materials9084/retro190_solutions/mol_57_search_tree.pdf]

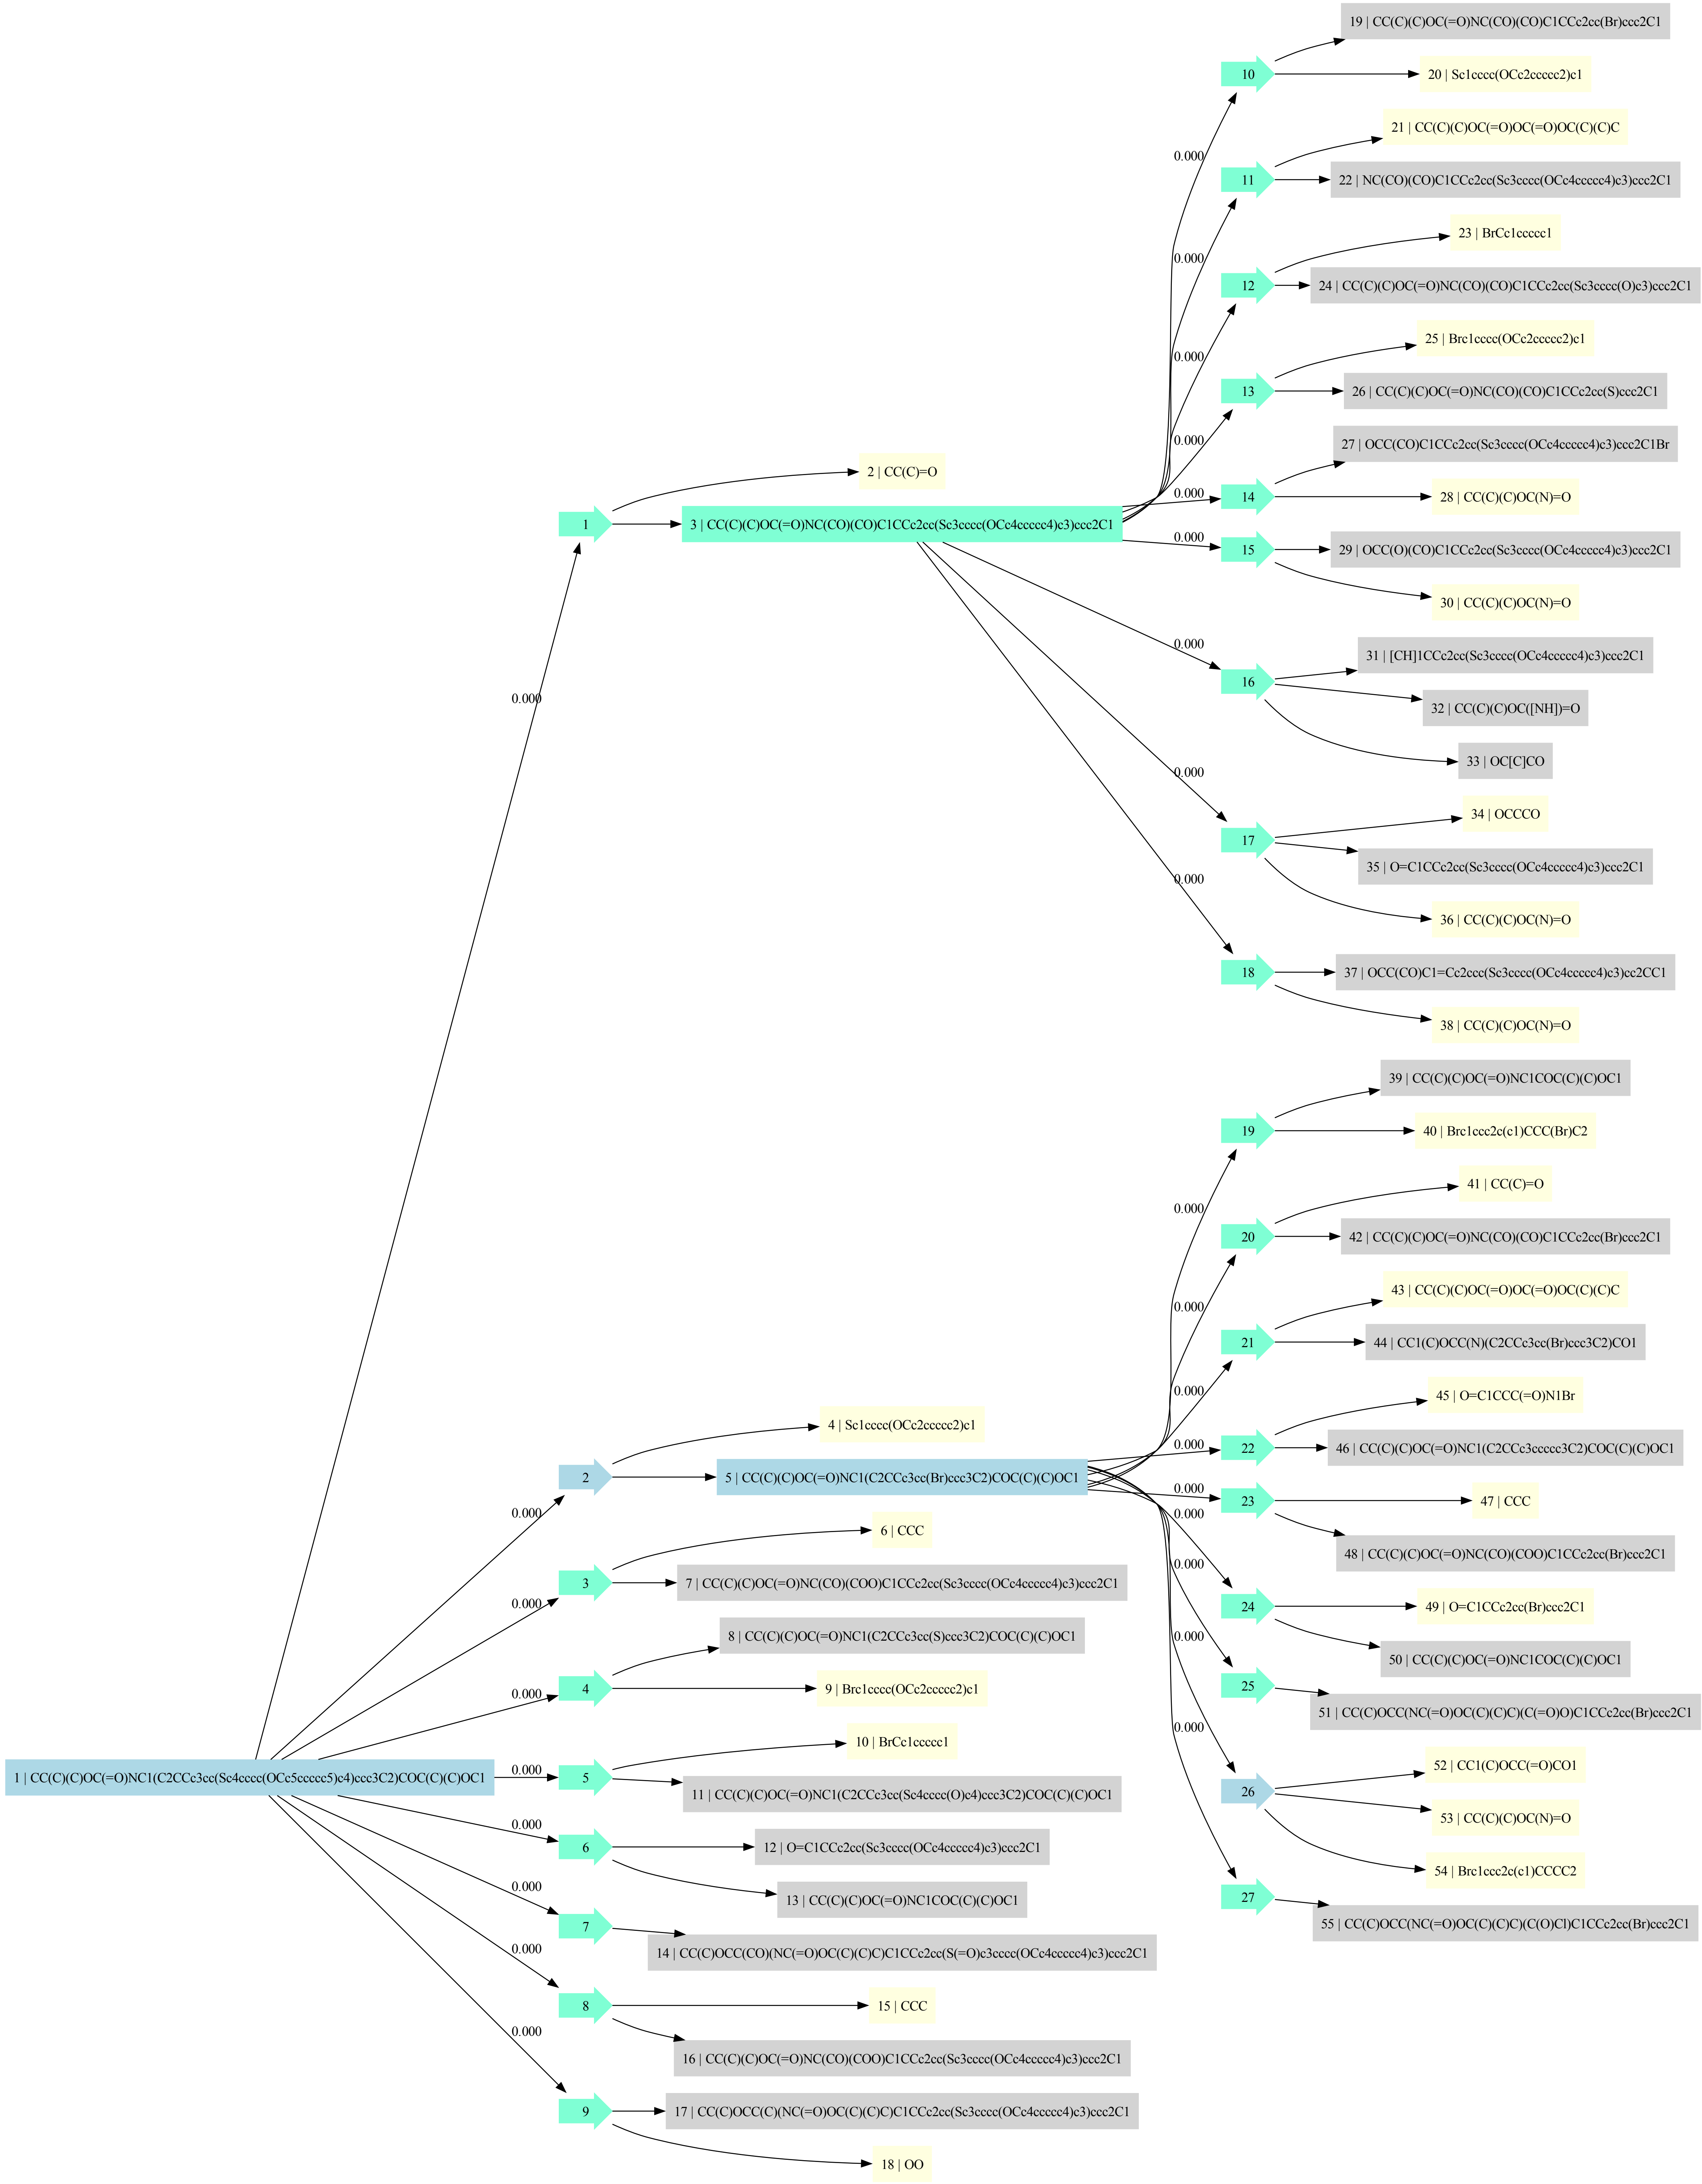

Supplement: supplementary_material [file mol_58_search_tree.pdf › materials9084/retro190_solutions/mol_58_search_tree.pdf]

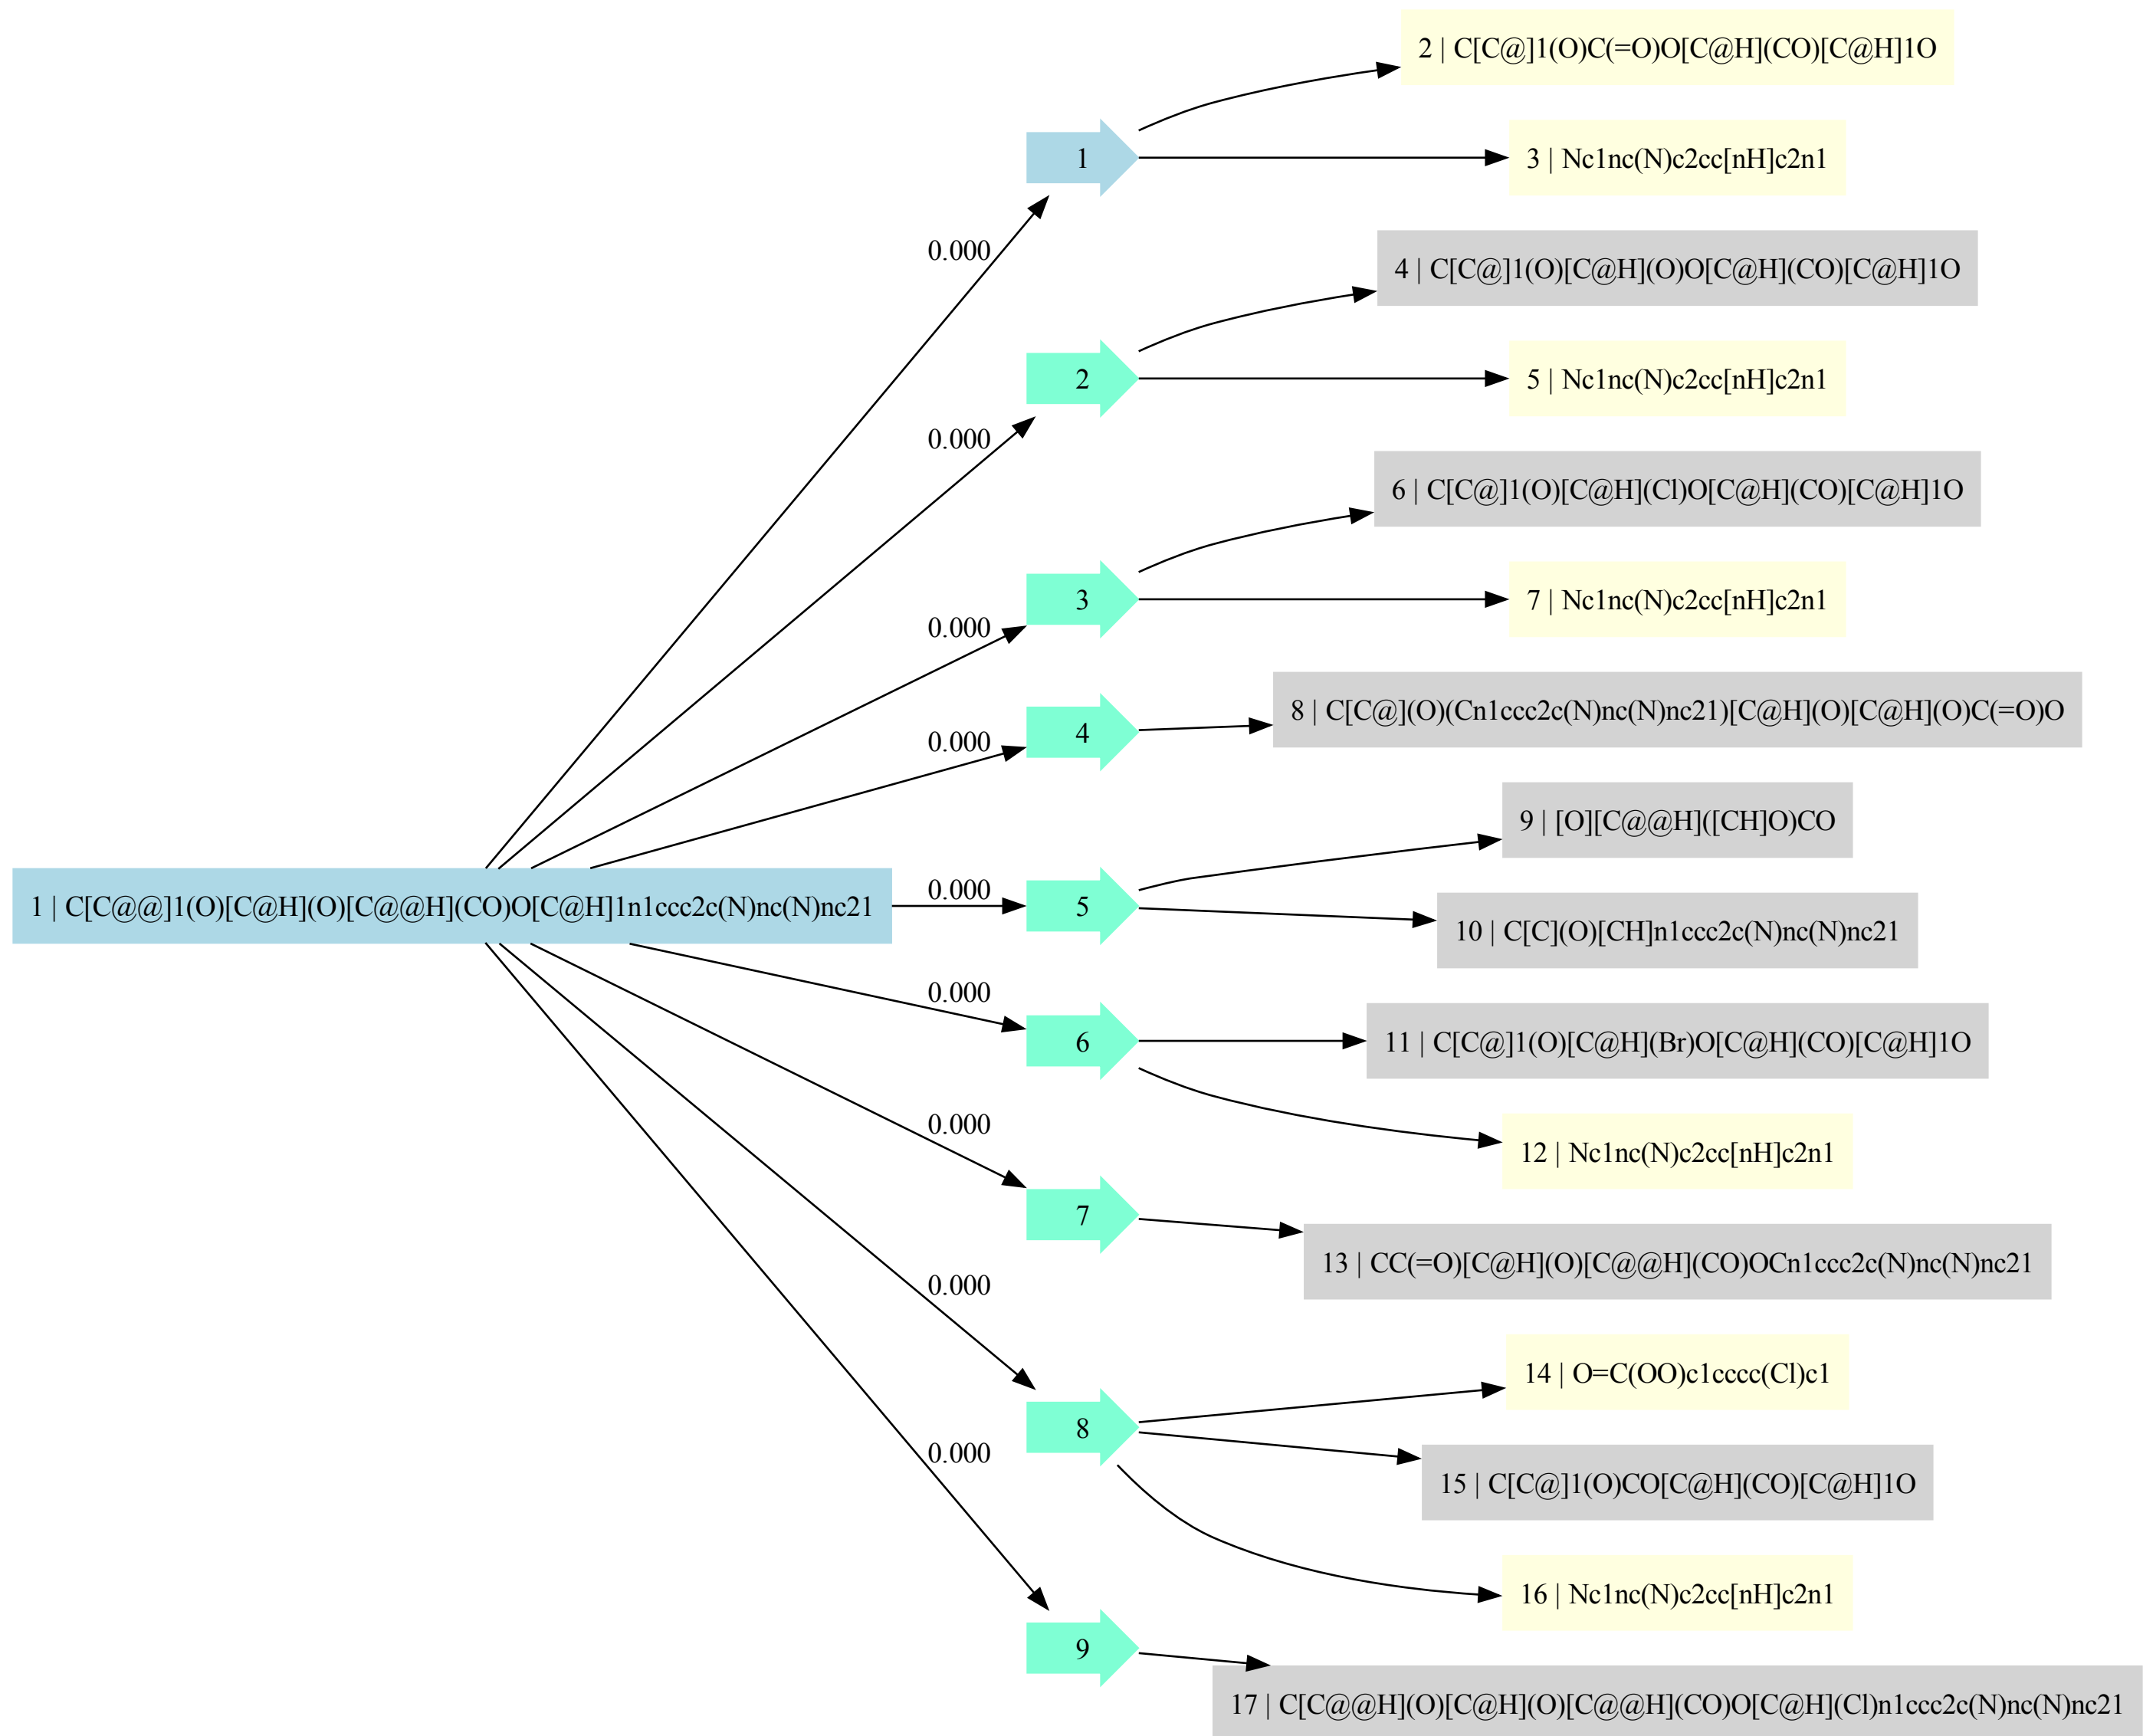

Supplement: supplementary_material [file mol_59_search_tree.pdf › materials9084/retro190_solutions/mol_59_search_tree.pdf]

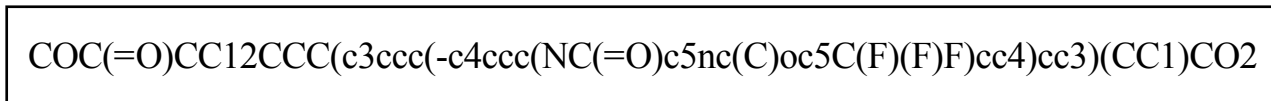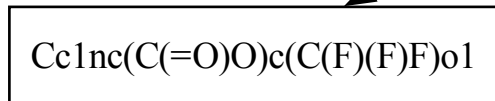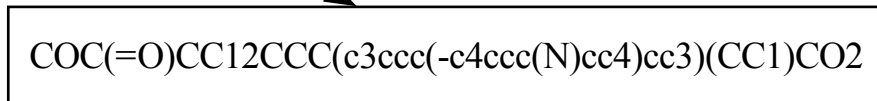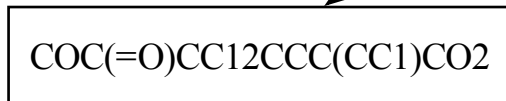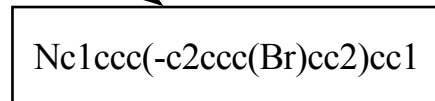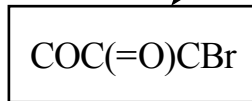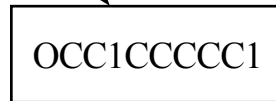

Supplement: supplementary_material [file mol_5_route_optimal.pdf › materials9084/retro190_solutions/mol_5_route_optimal.pdf]

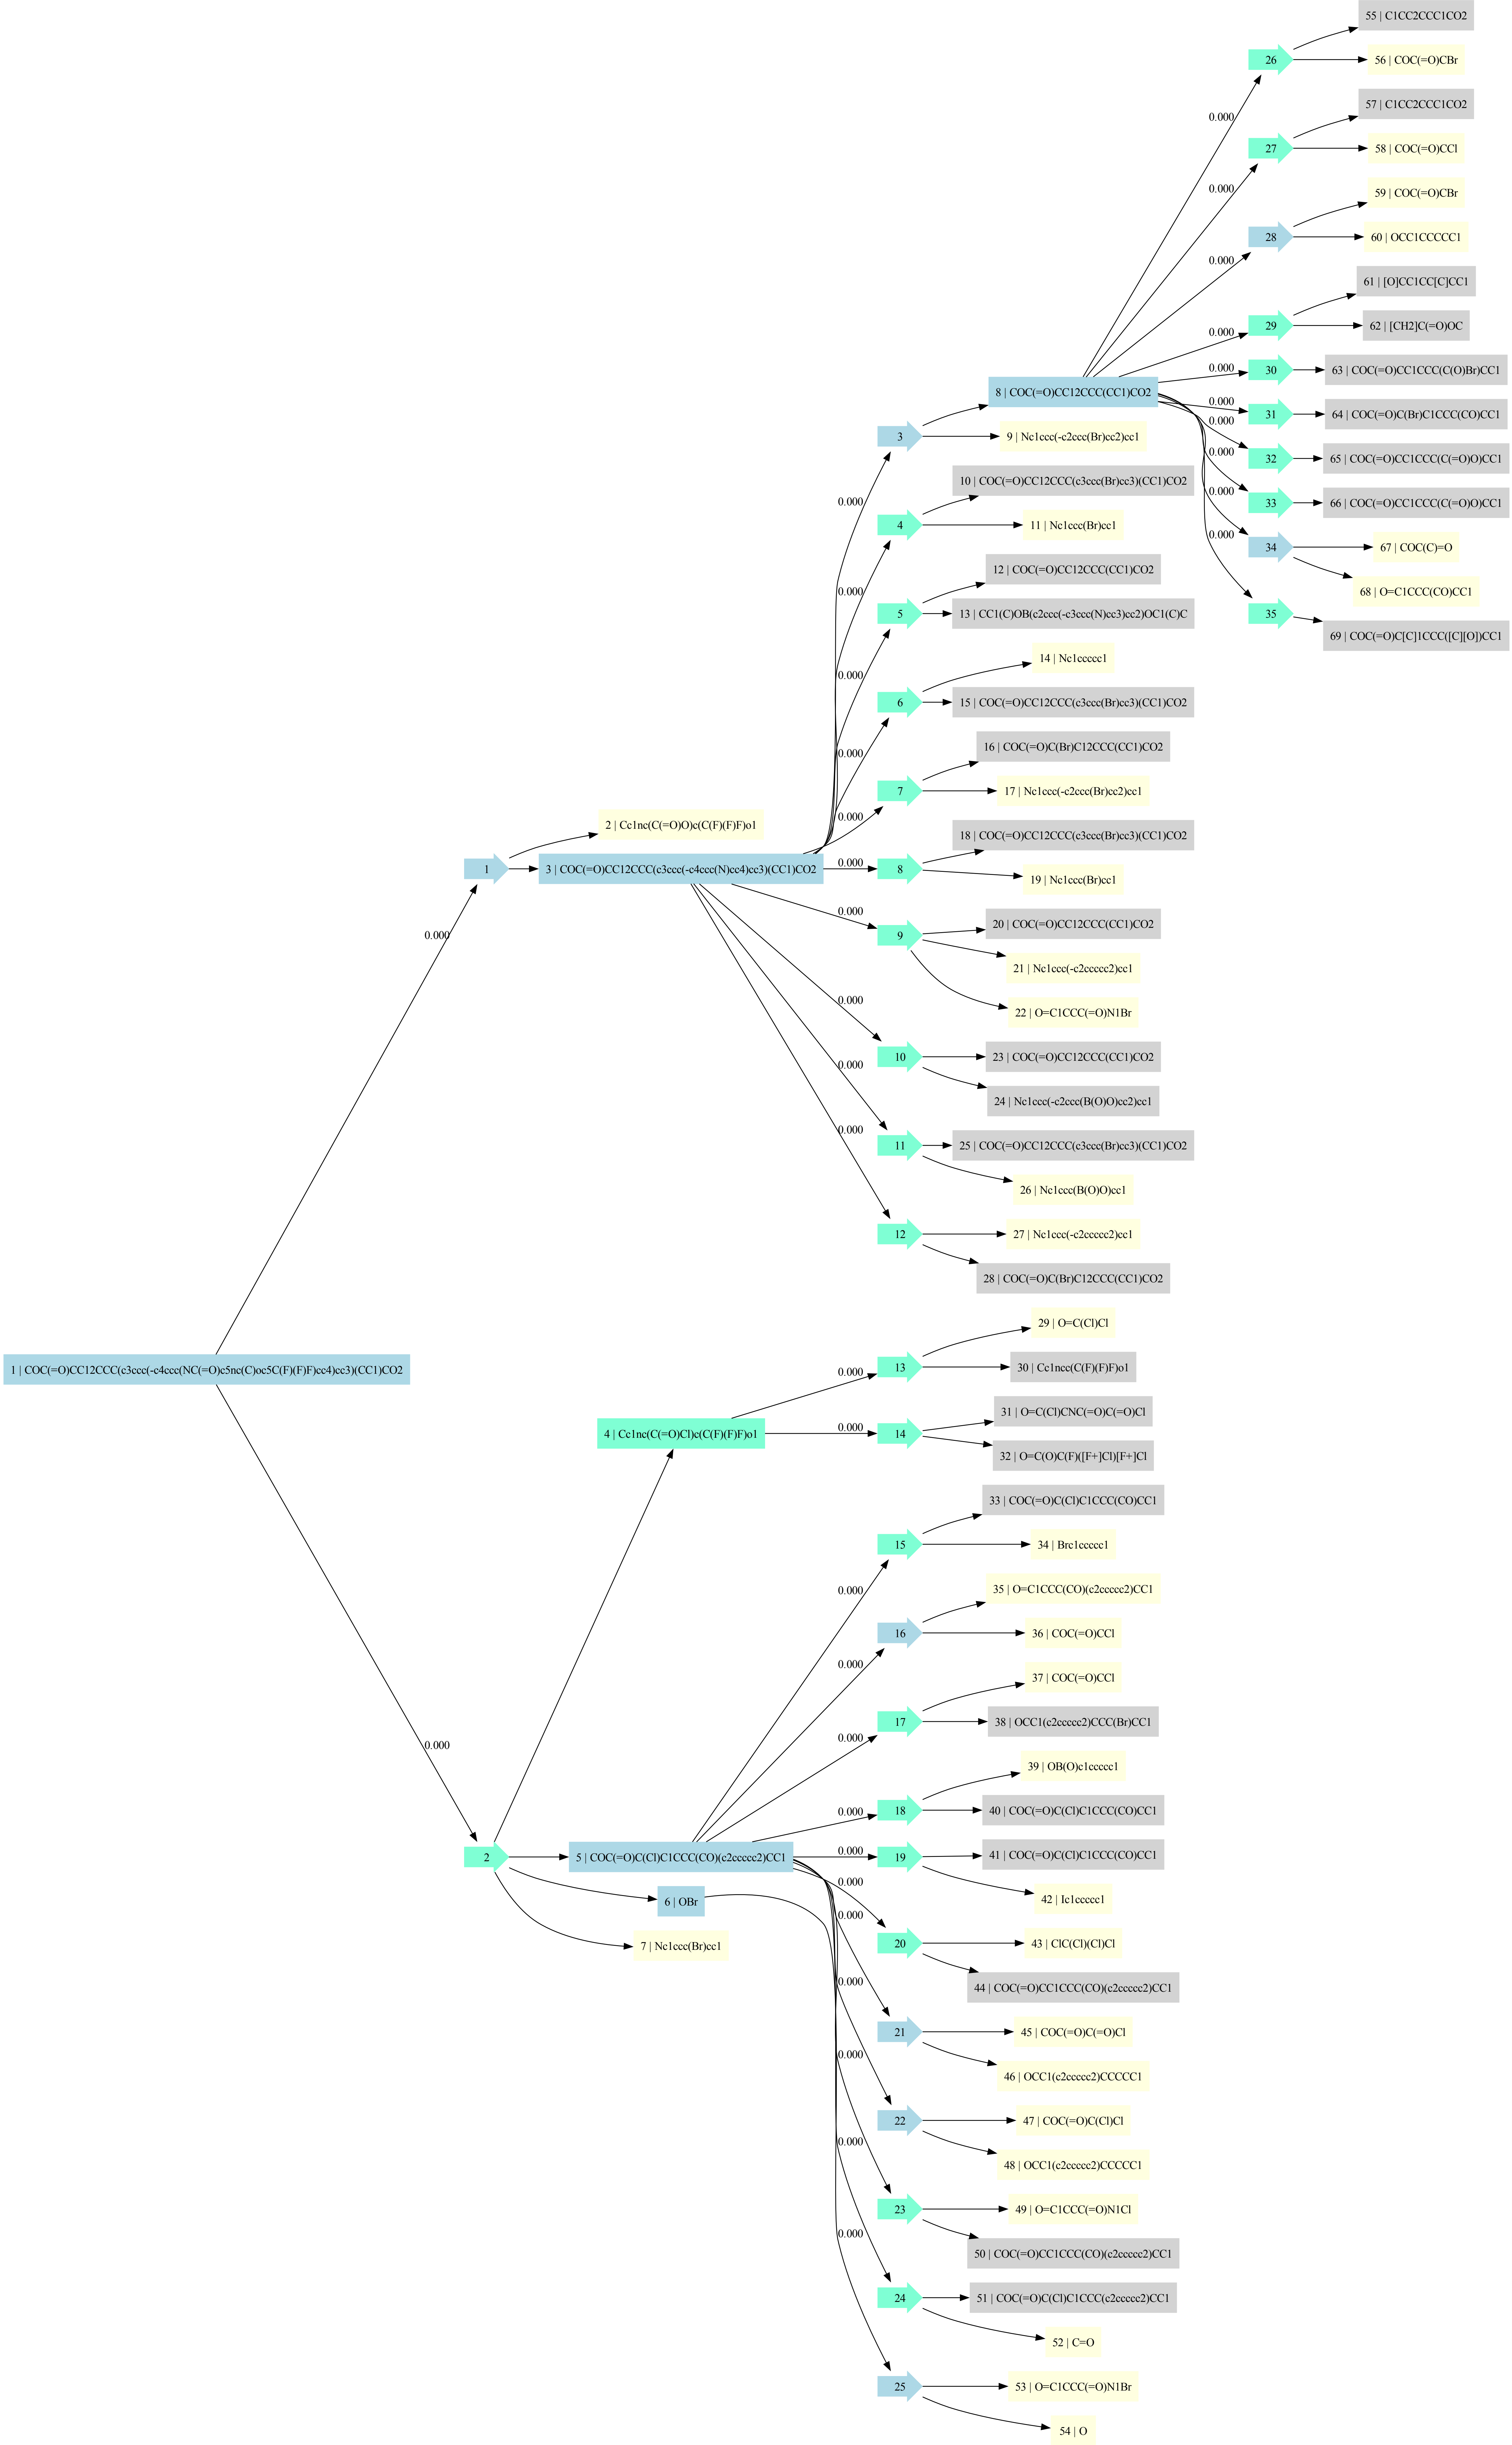

Supplement: supplementary_material [file mol_5_search_tree.pdf › materials9084/retro190_solutions/mol_5_search_tree.pdf]

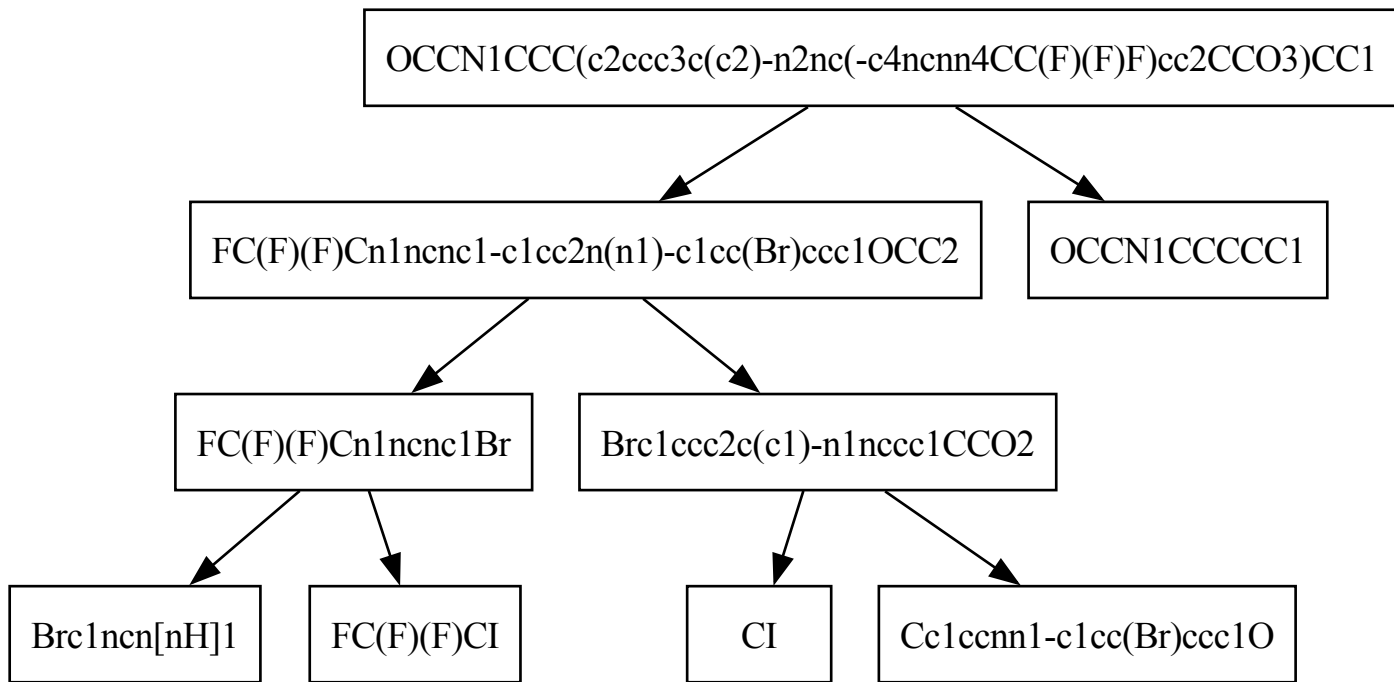

Supplement: supplementary_material [file mol_60_route_optimal.pdf › materials9084/retro190_solutions/mol_60_route_optimal.pdf]

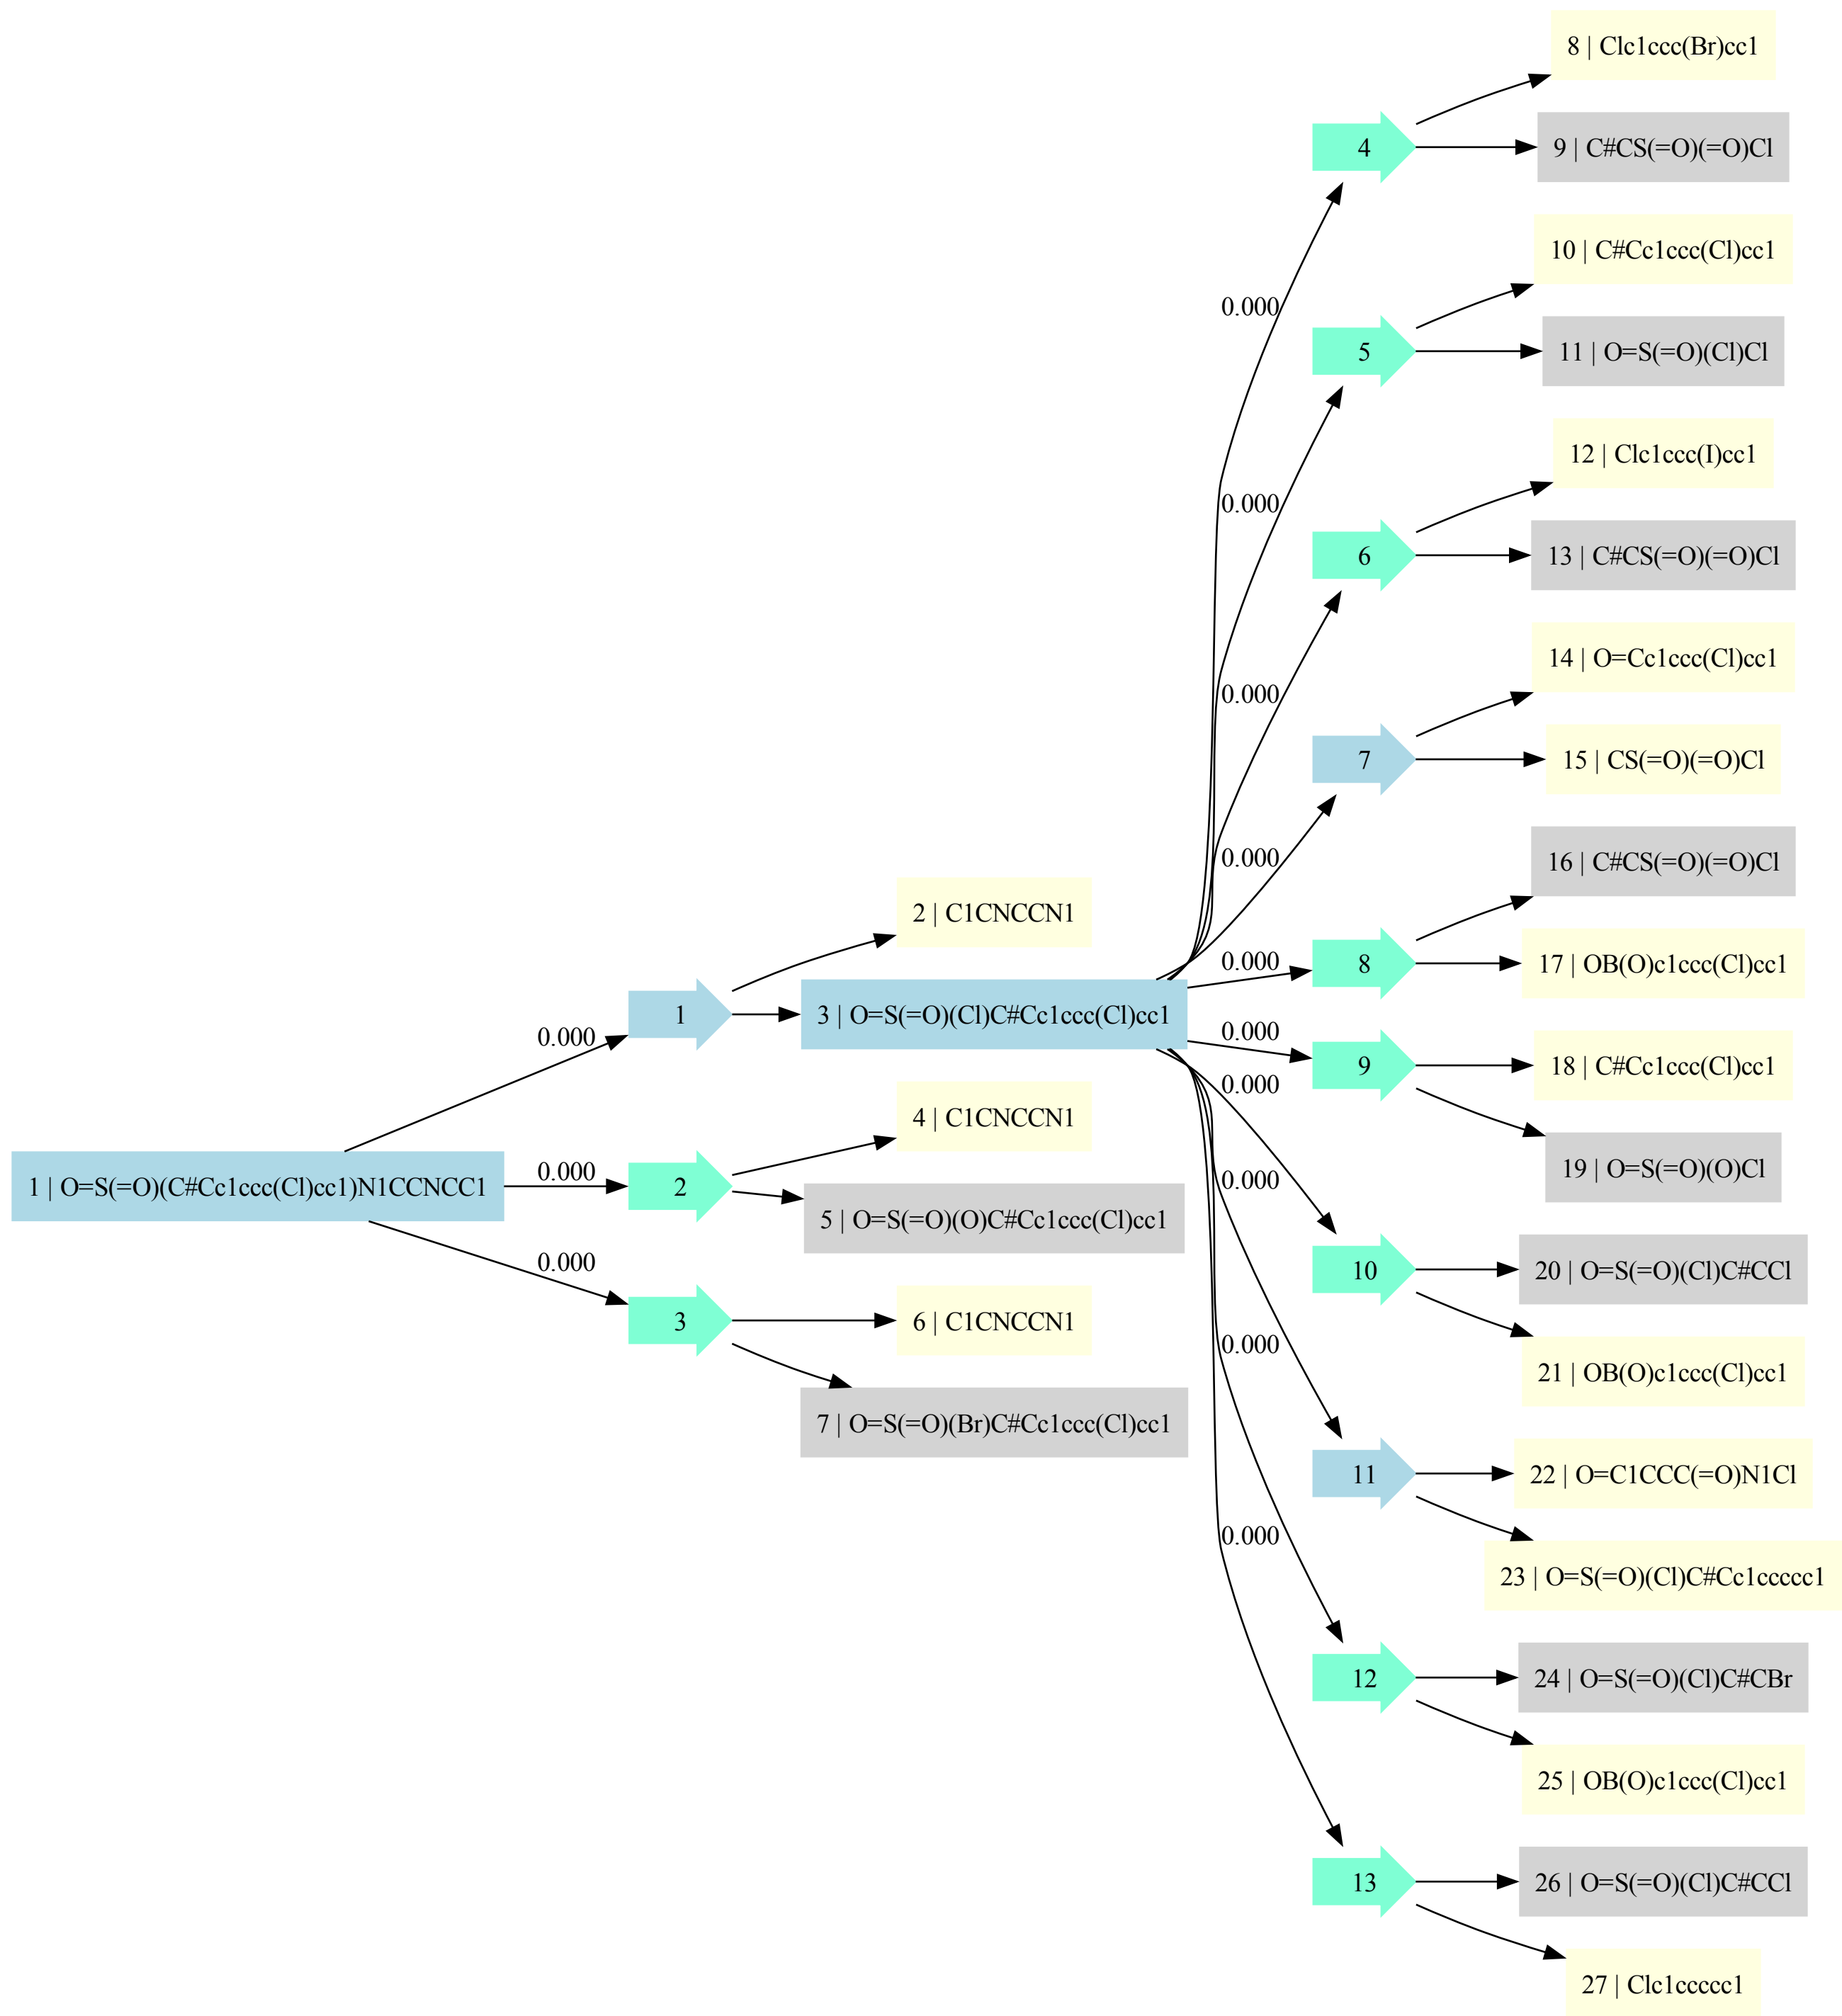

Supplement: supplementary_material [file mol_61_search_tree.pdf › materials9084/retro190_solutions/mol_61_search_tree.pdf]

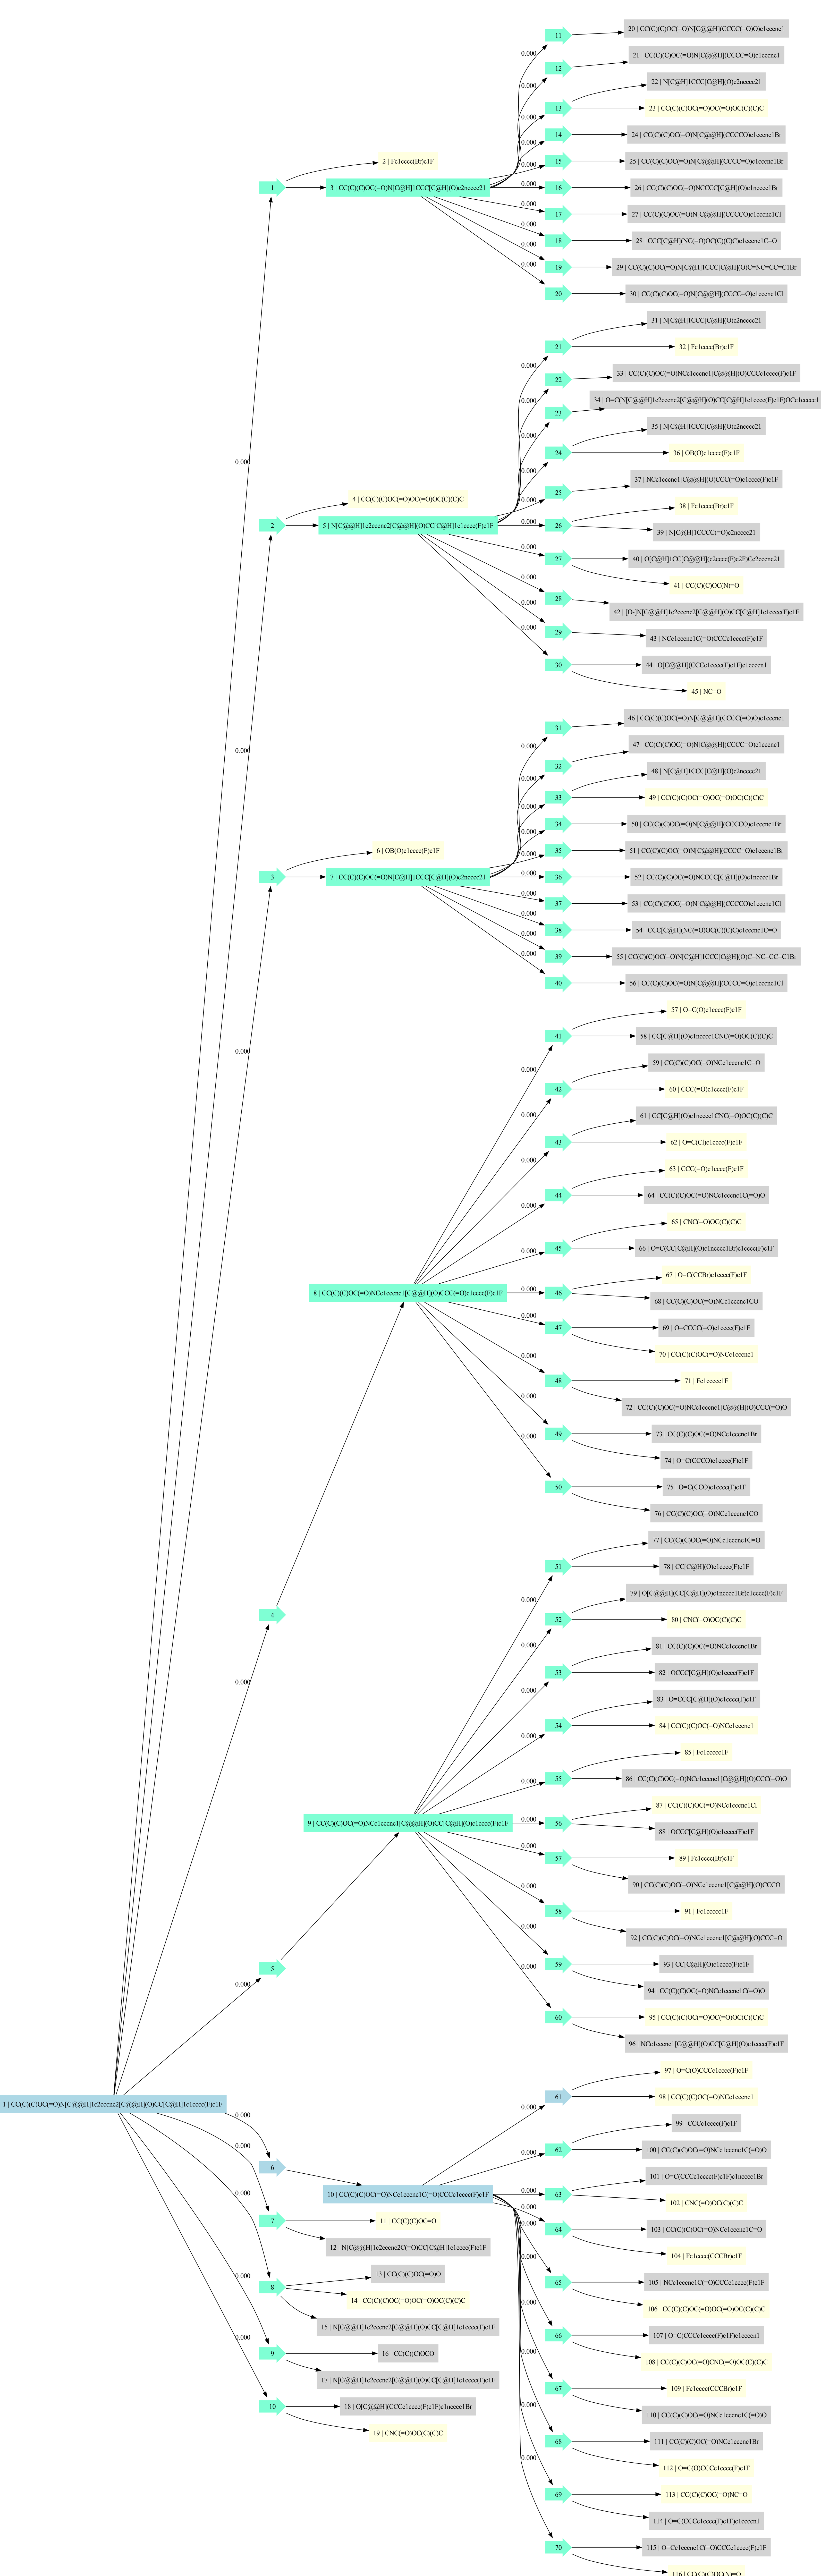

Supplement: supplementary_material [file mol_63_search_tree.pdf › materials9084/retro190_solutions/mol_63_search_tree.pdf]

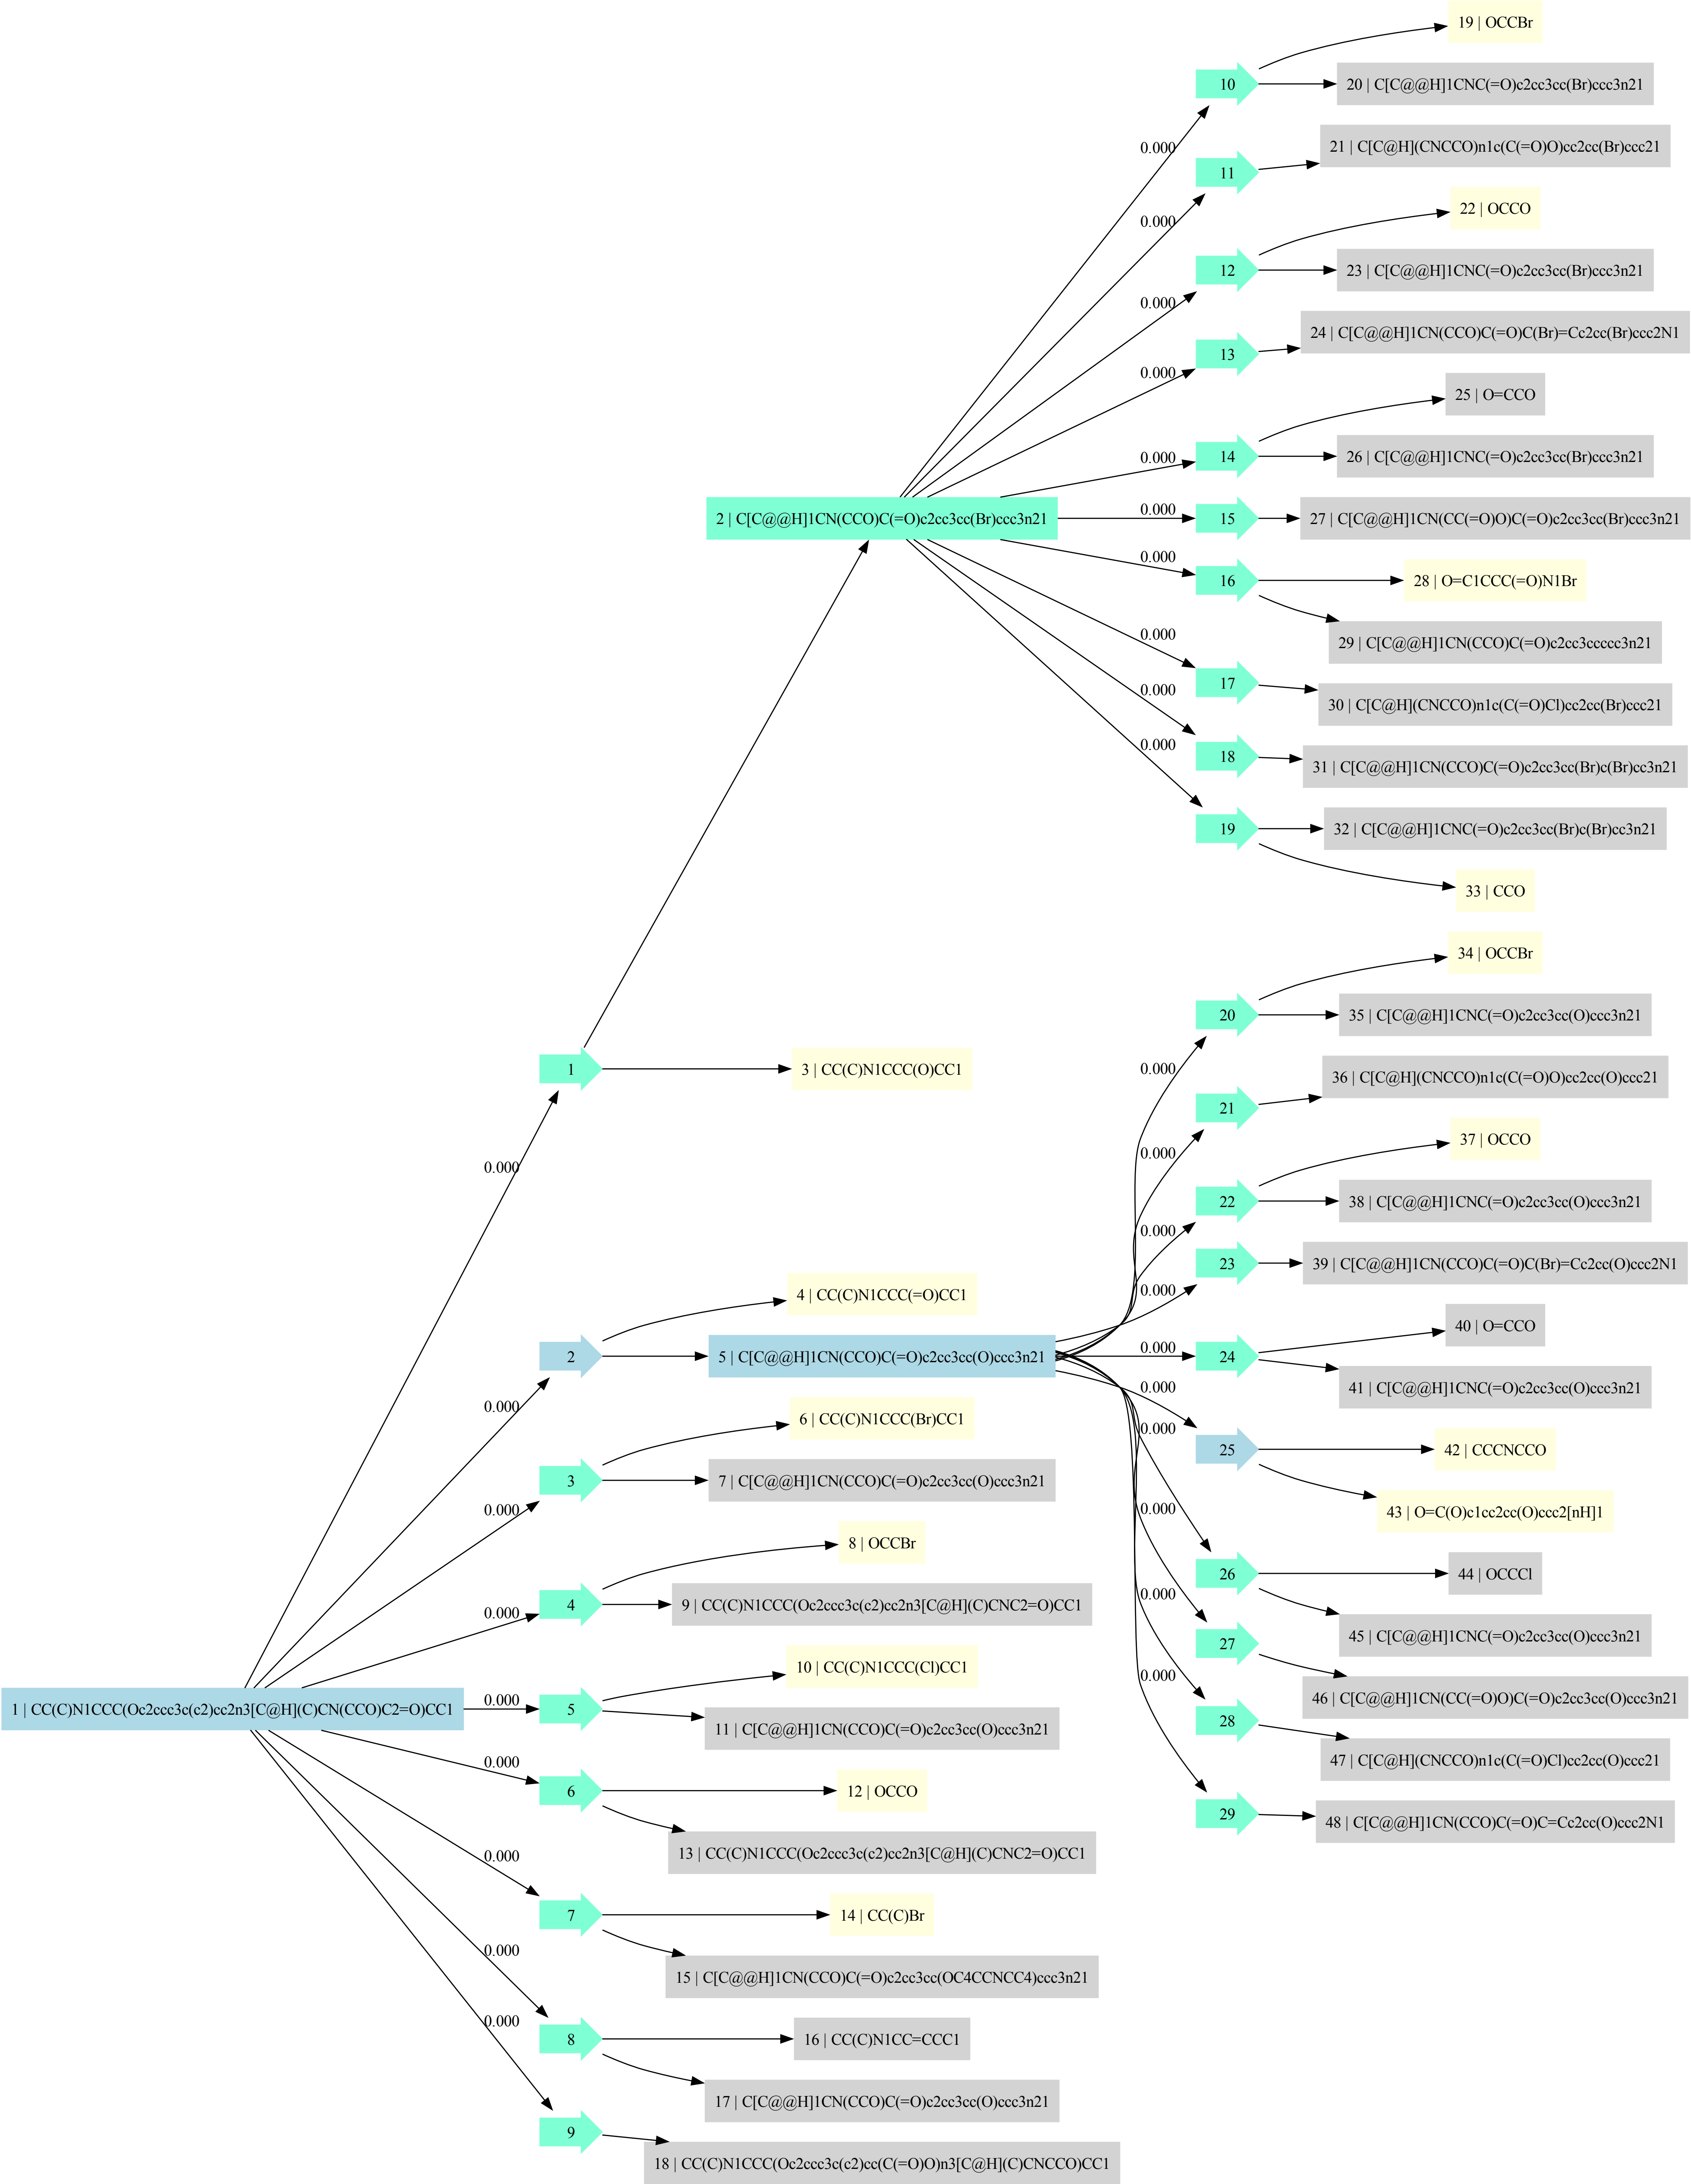

Supplement: supplementary_material [file mol_64_search_tree.pdf › materials9084/retro190_solutions/mol_64_search_tree.pdf]

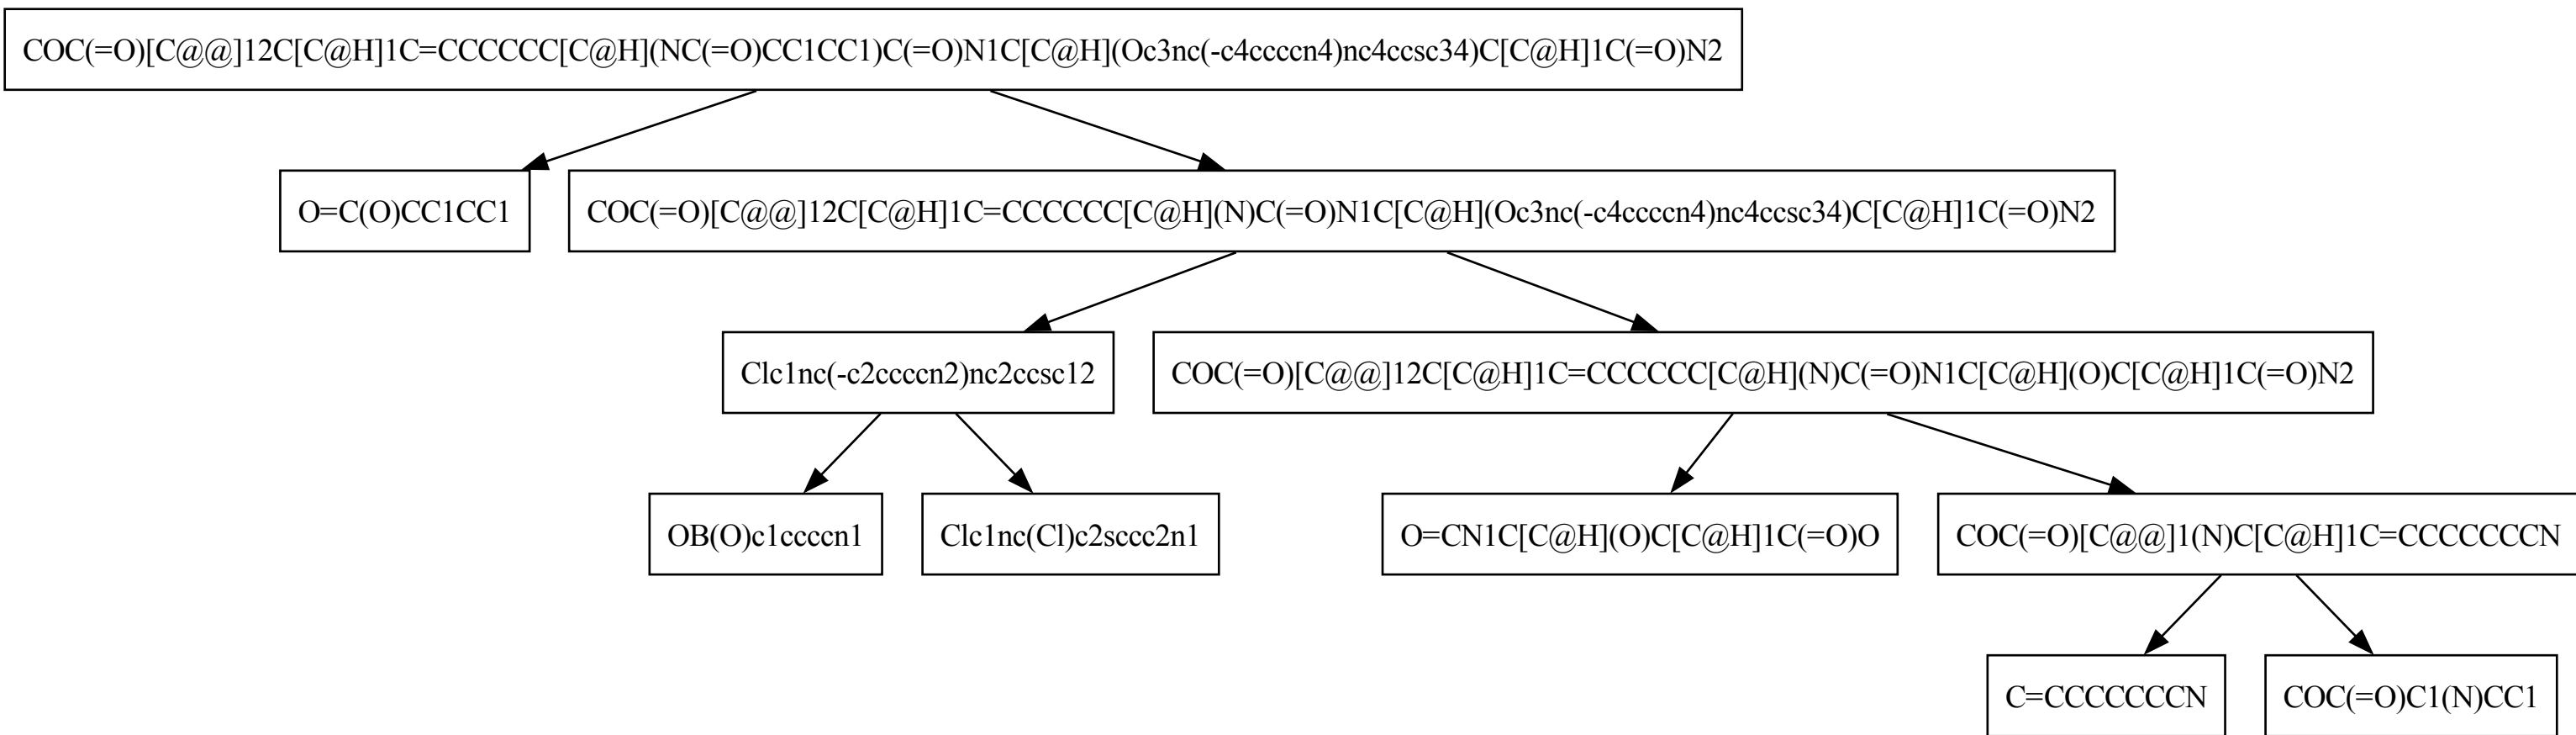

Supplement: supplementary_material [file mol_65_route_optimal.pdf › materials9084/retro190_solutions/mol_65_route_optimal.pdf]

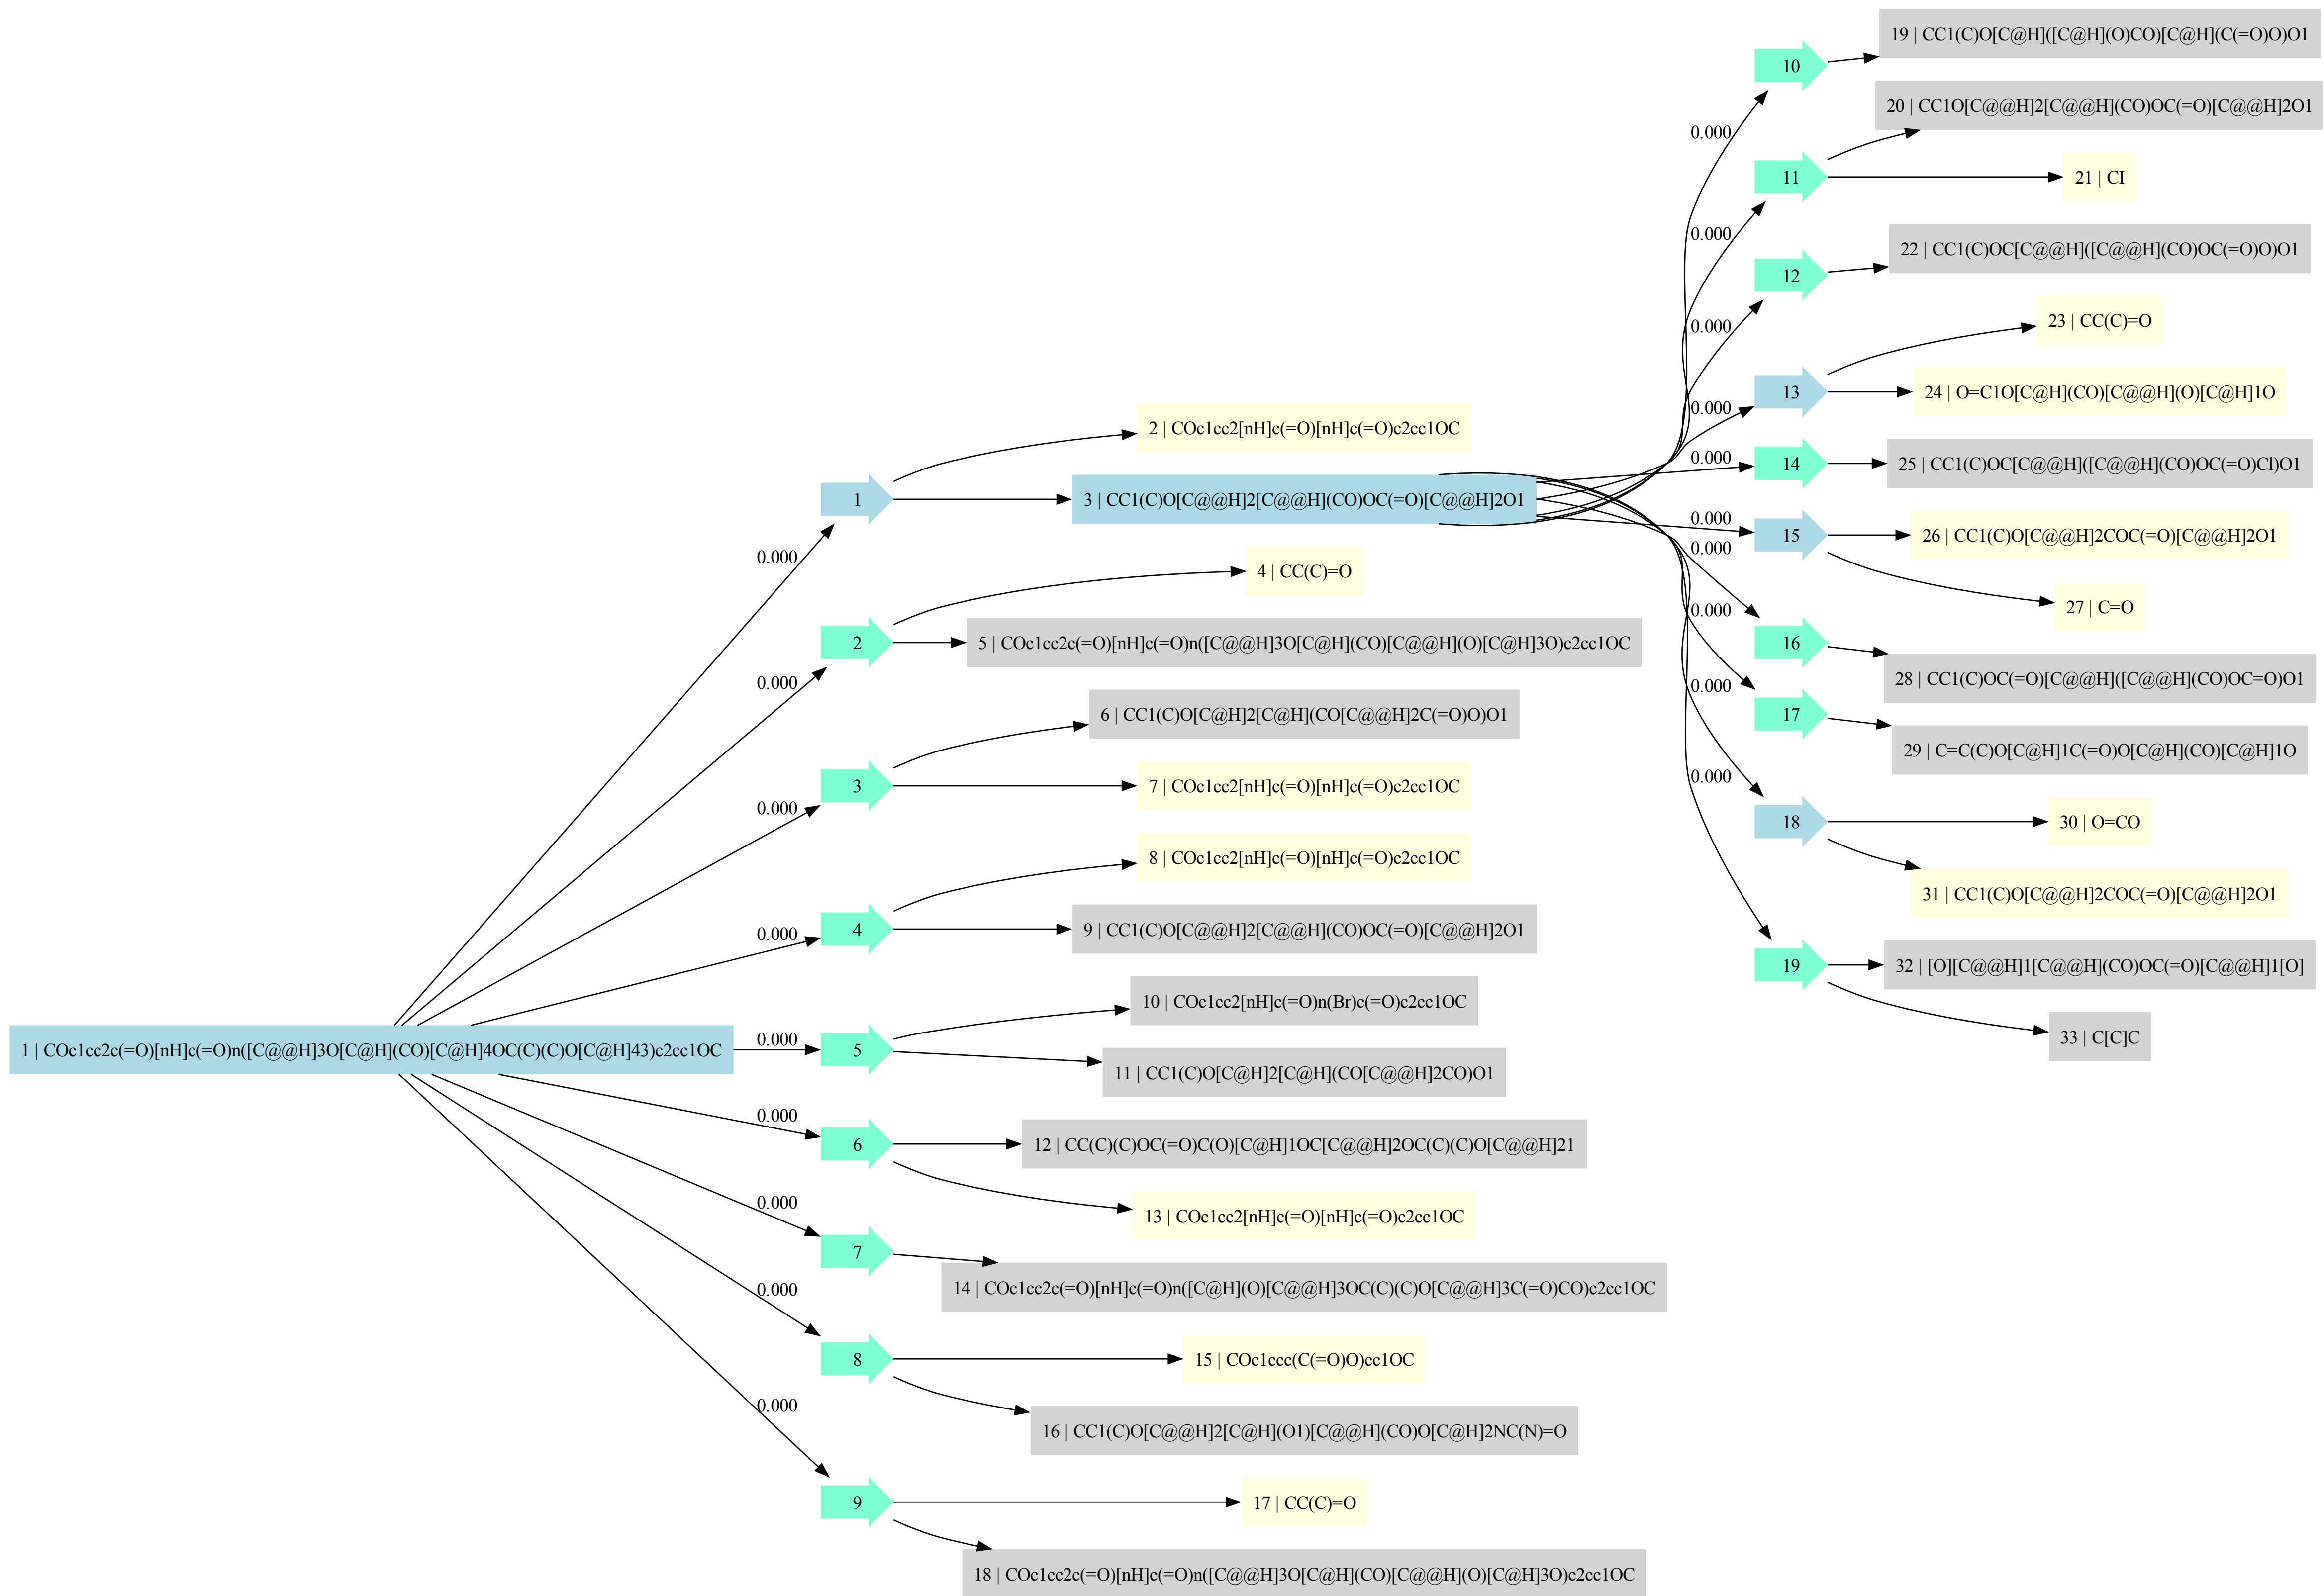

Supplement: supplementary_material [file mol_66_search_tree.pdf › materials9084/retro190_solutions/mol_66_search_tree.pdf]

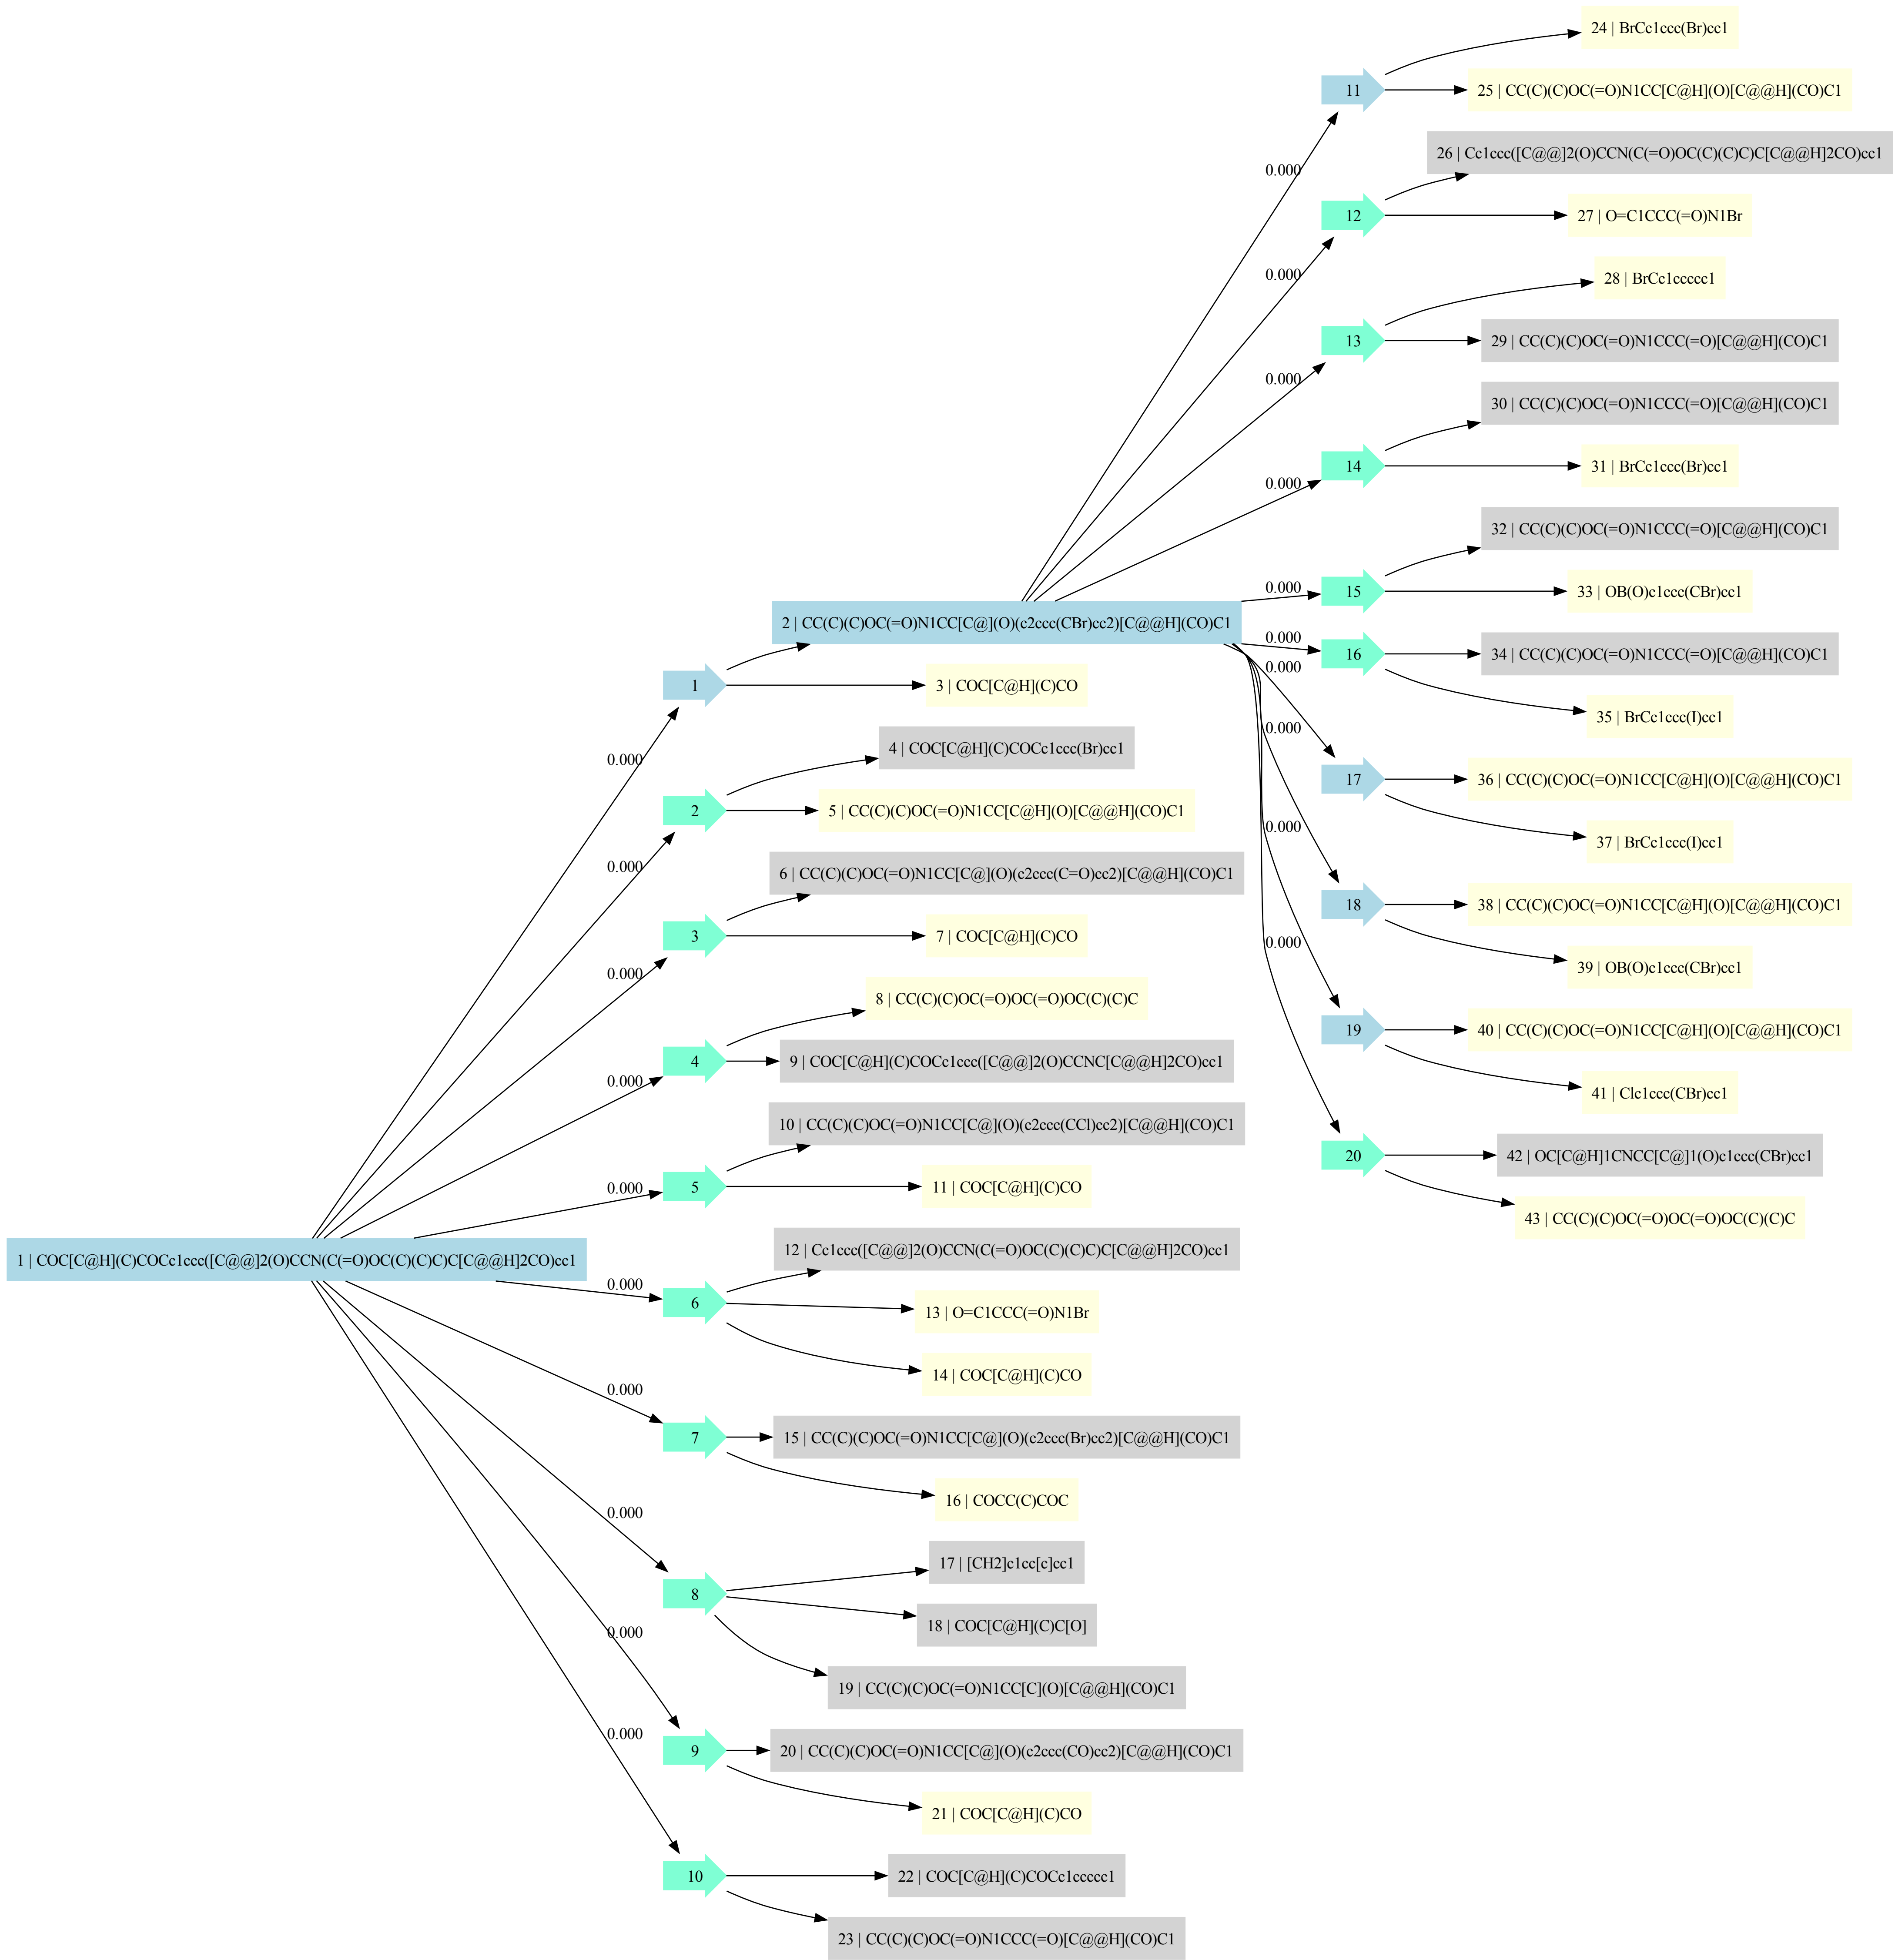

Supplement: supplementary_material [file mol_67_search_tree.pdf › materials9084/retro190_solutions/mol_67_search_tree.pdf]

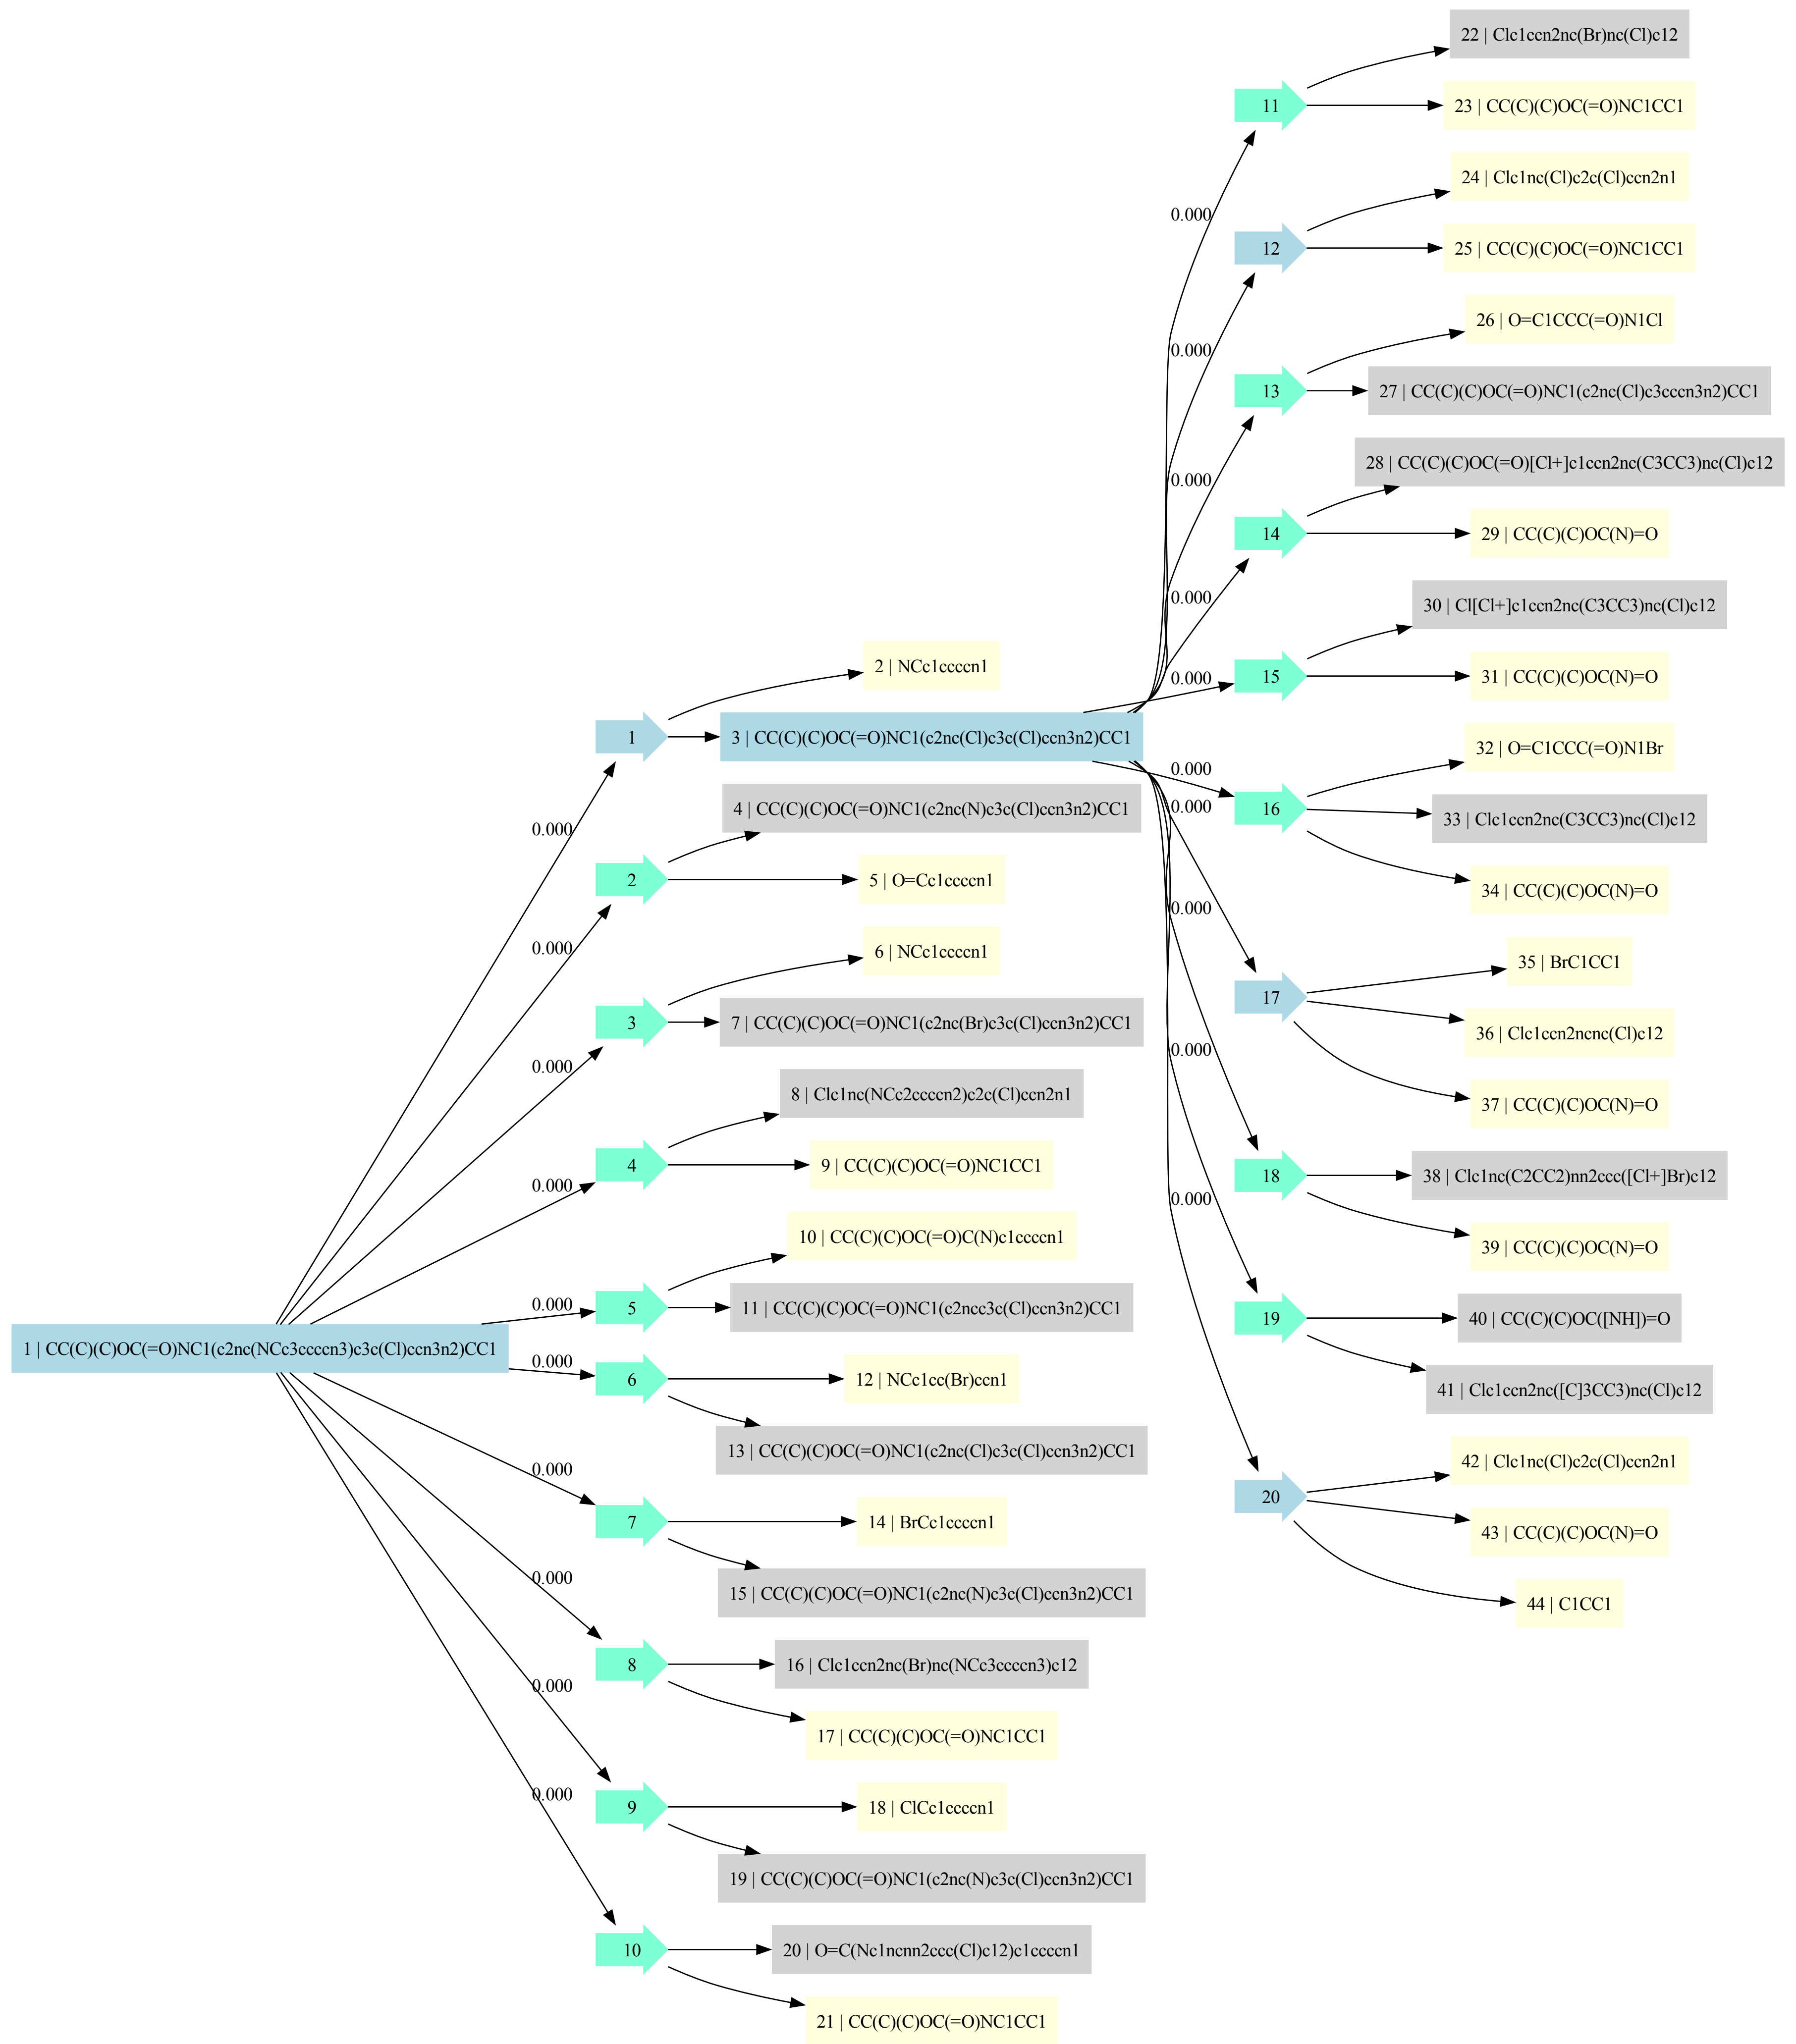

Supplement: supplementary_material [file mol_69_search_tree.pdf › materials9084/retro190_solutions/mol_69_search_tree.pdf]

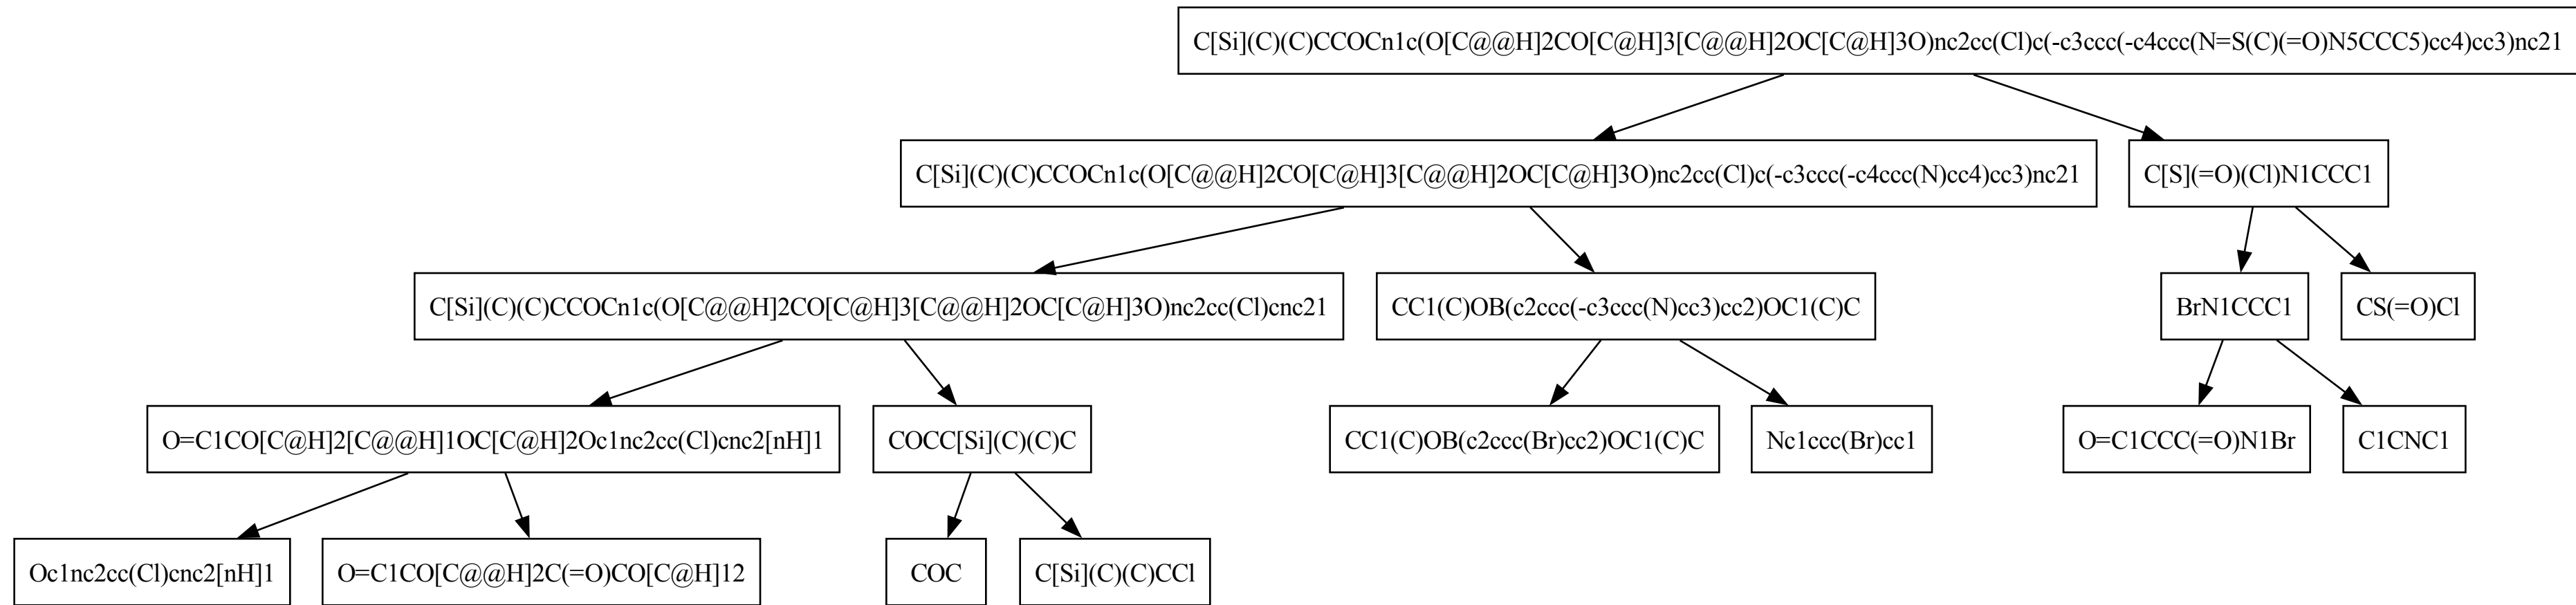

Supplement: supplementary_material [file mol_6_route_optimal.pdf › materials9084/retro190_solutions/mol_6_route_optimal.pdf]

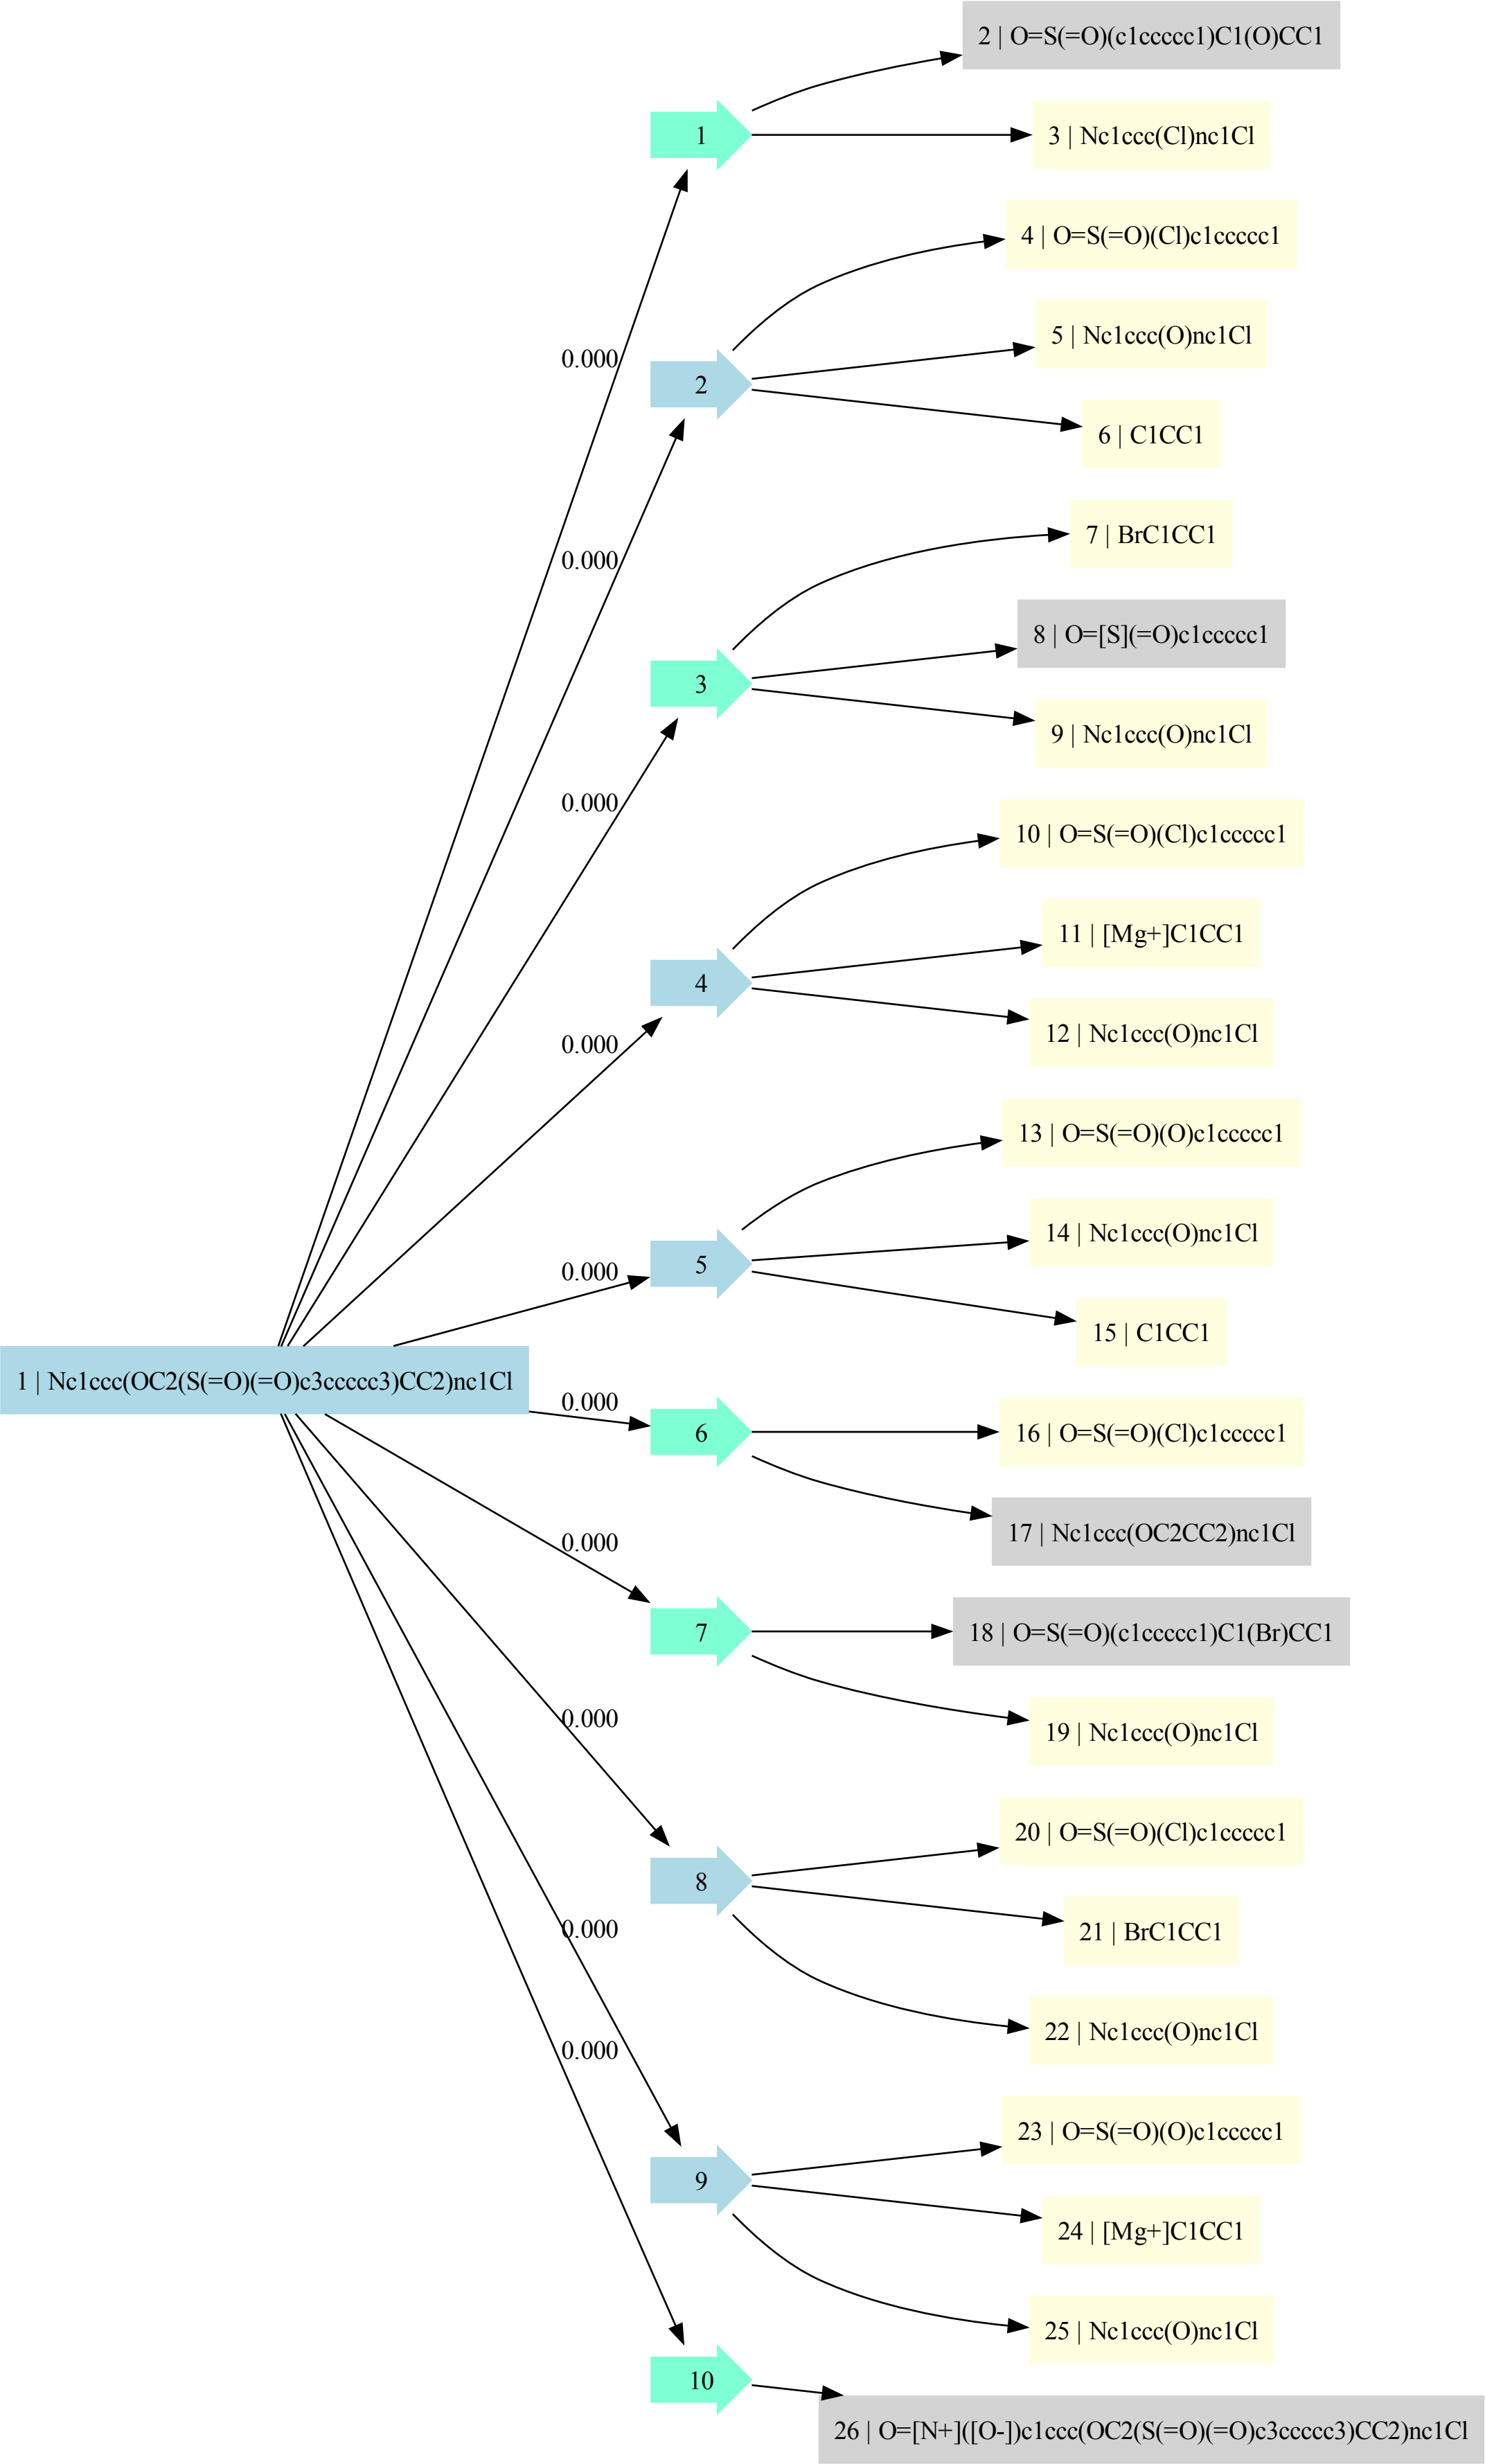

Supplement: supplementary_material [file mol_71_search_tree.pdf › materials9084/retro190_solutions/mol_71_search_tree.pdf]

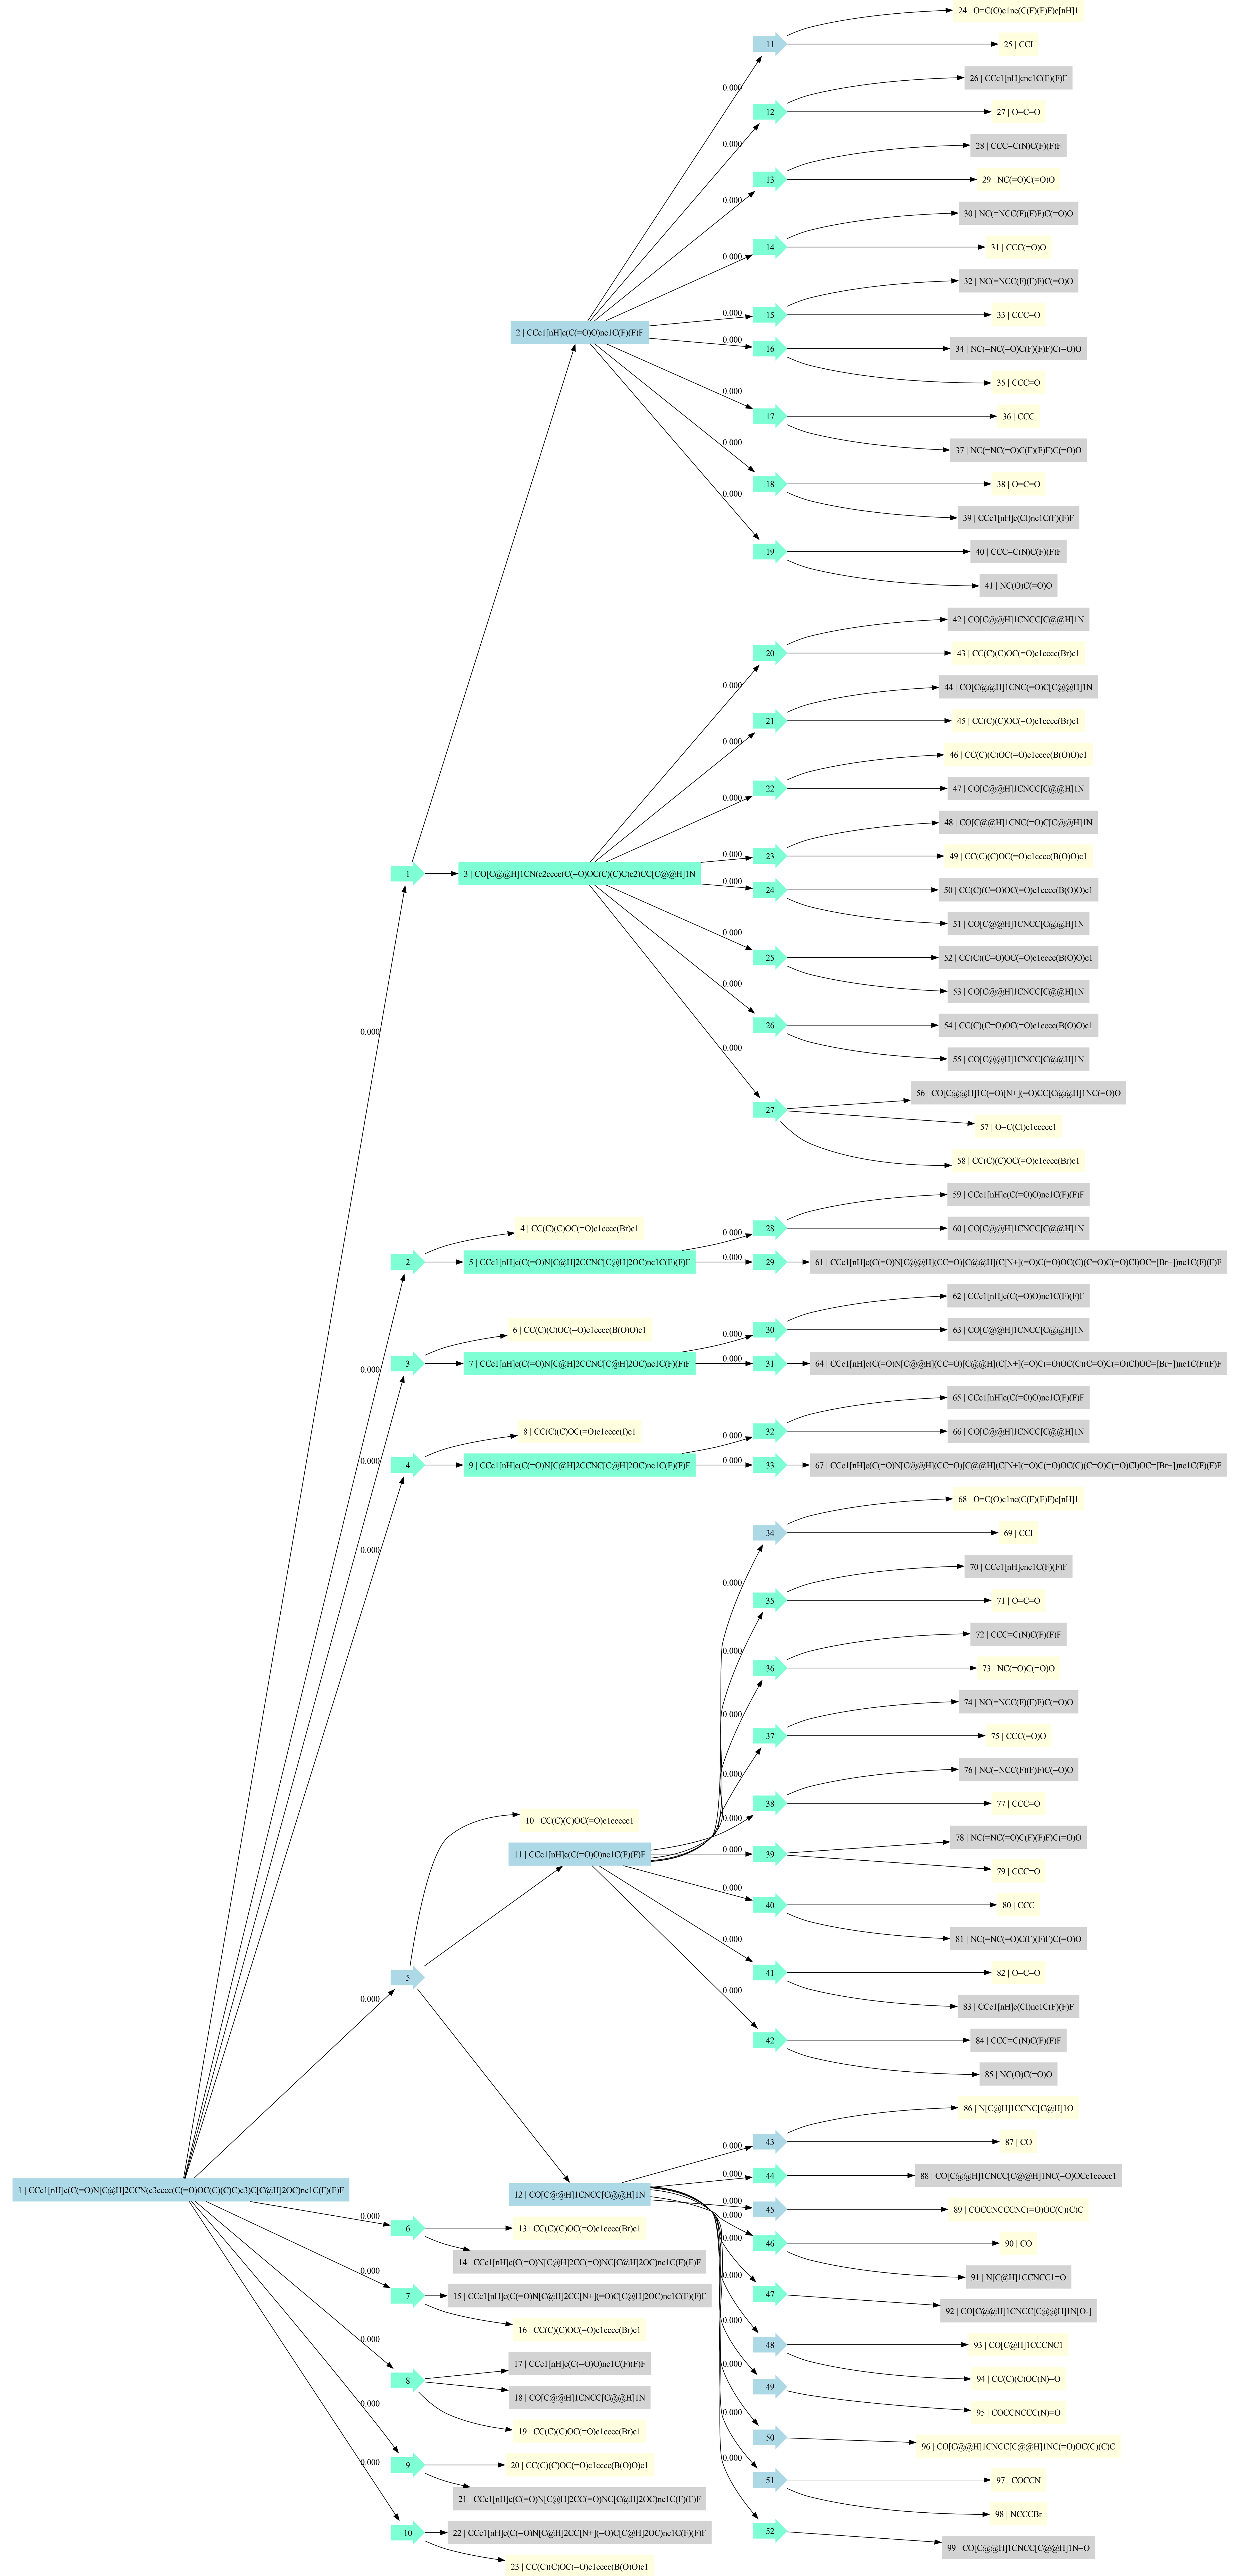

Supplement: supplementary_material [file mol_72_search_tree.pdf › materials9084/retro190_solutions/mol_72_search_tree.pdf]

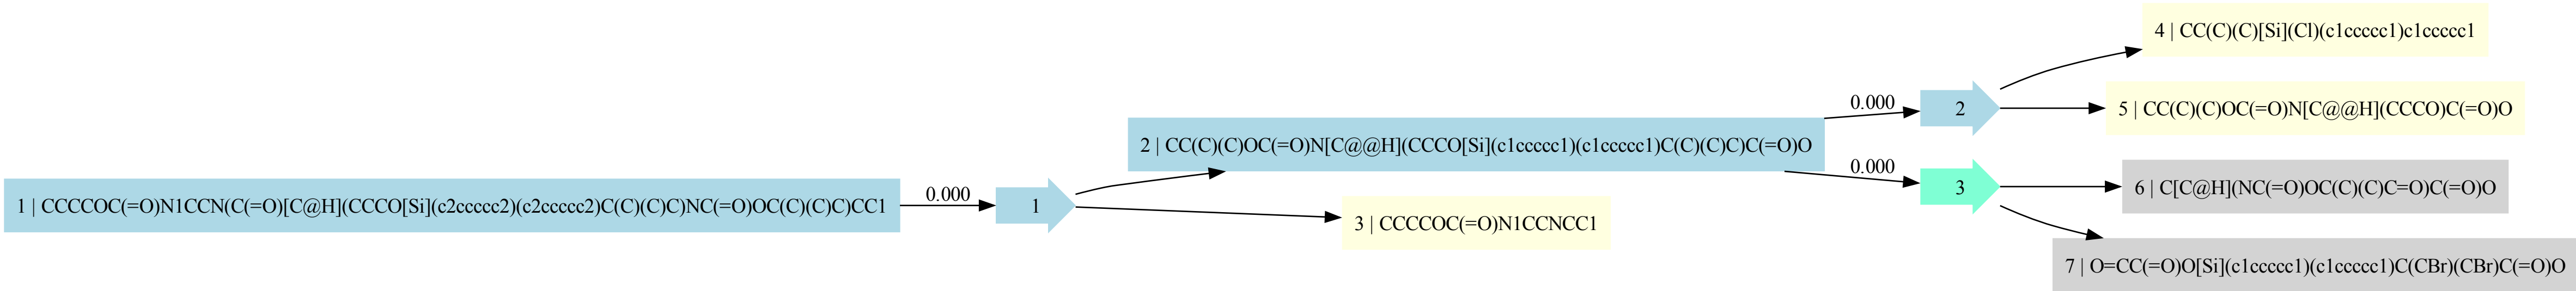

Supplement: supplementary_material [file mol_73_search_tree.pdf › materials9084/retro190_solutions/mol_73_search_tree.pdf]

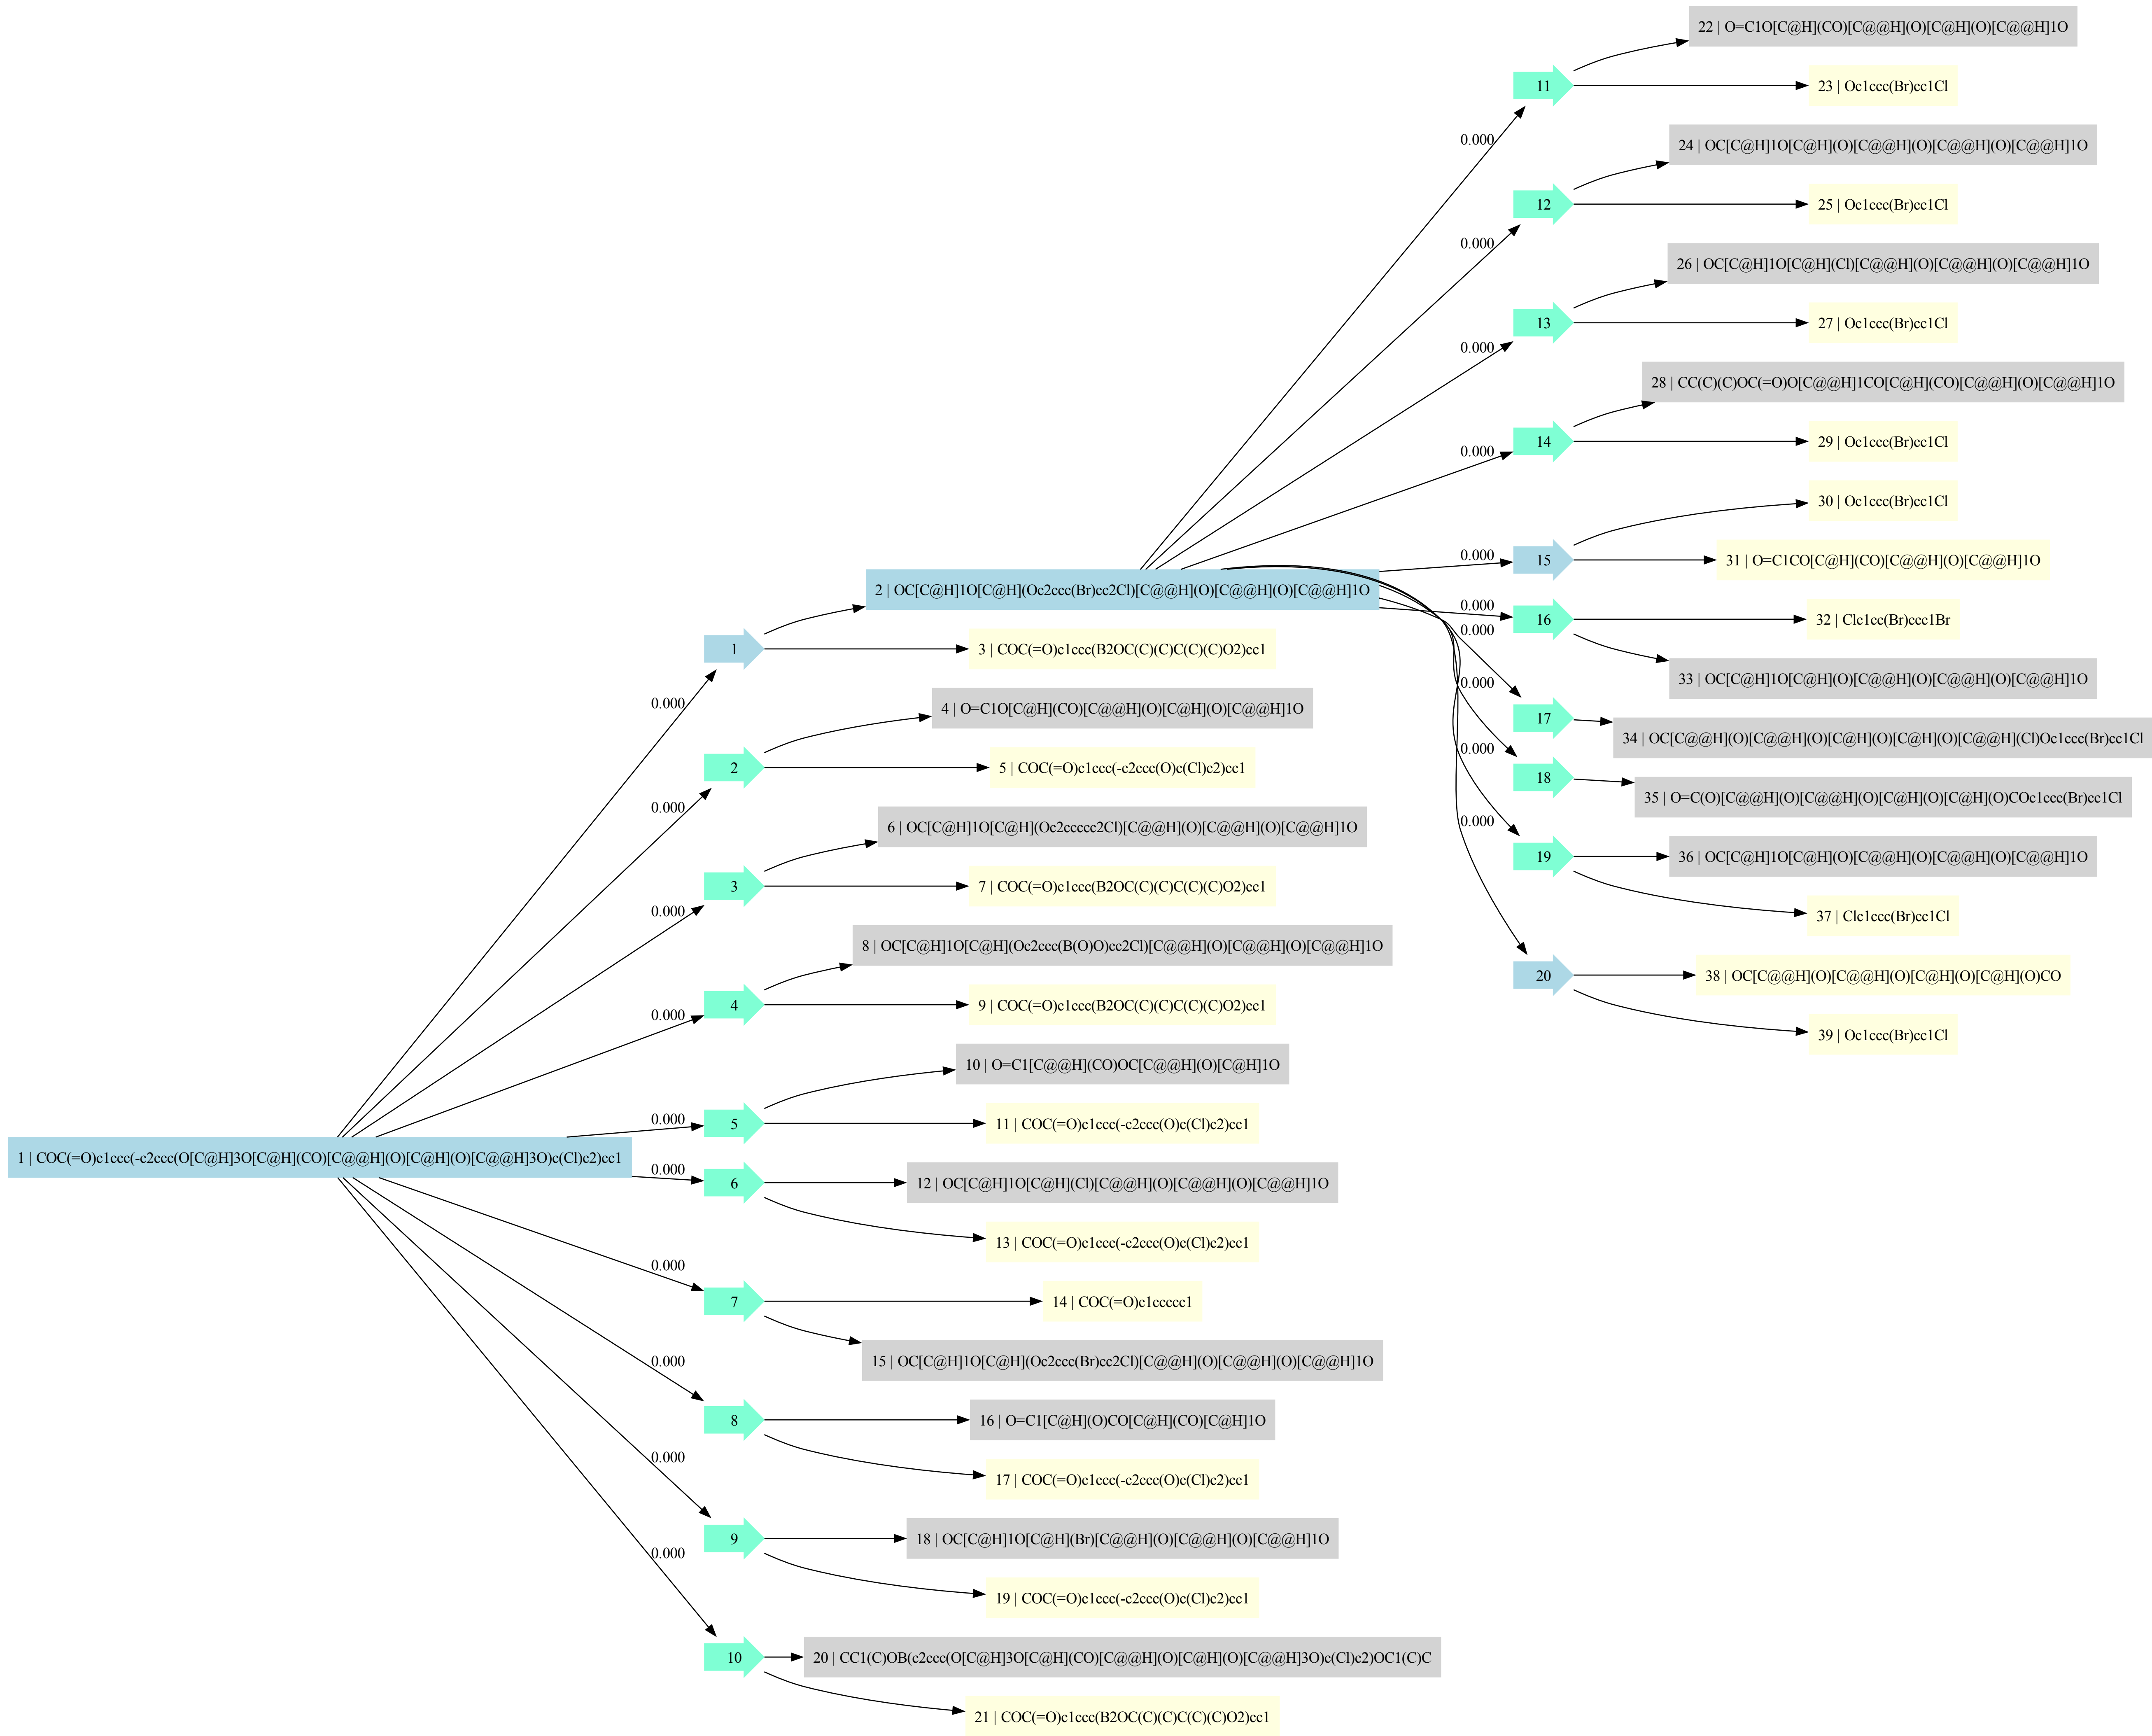

Supplement: supplementary_material [file mol_75_search_tree.pdf › materials9084/retro190_solutions/mol_75_search_tree.pdf]

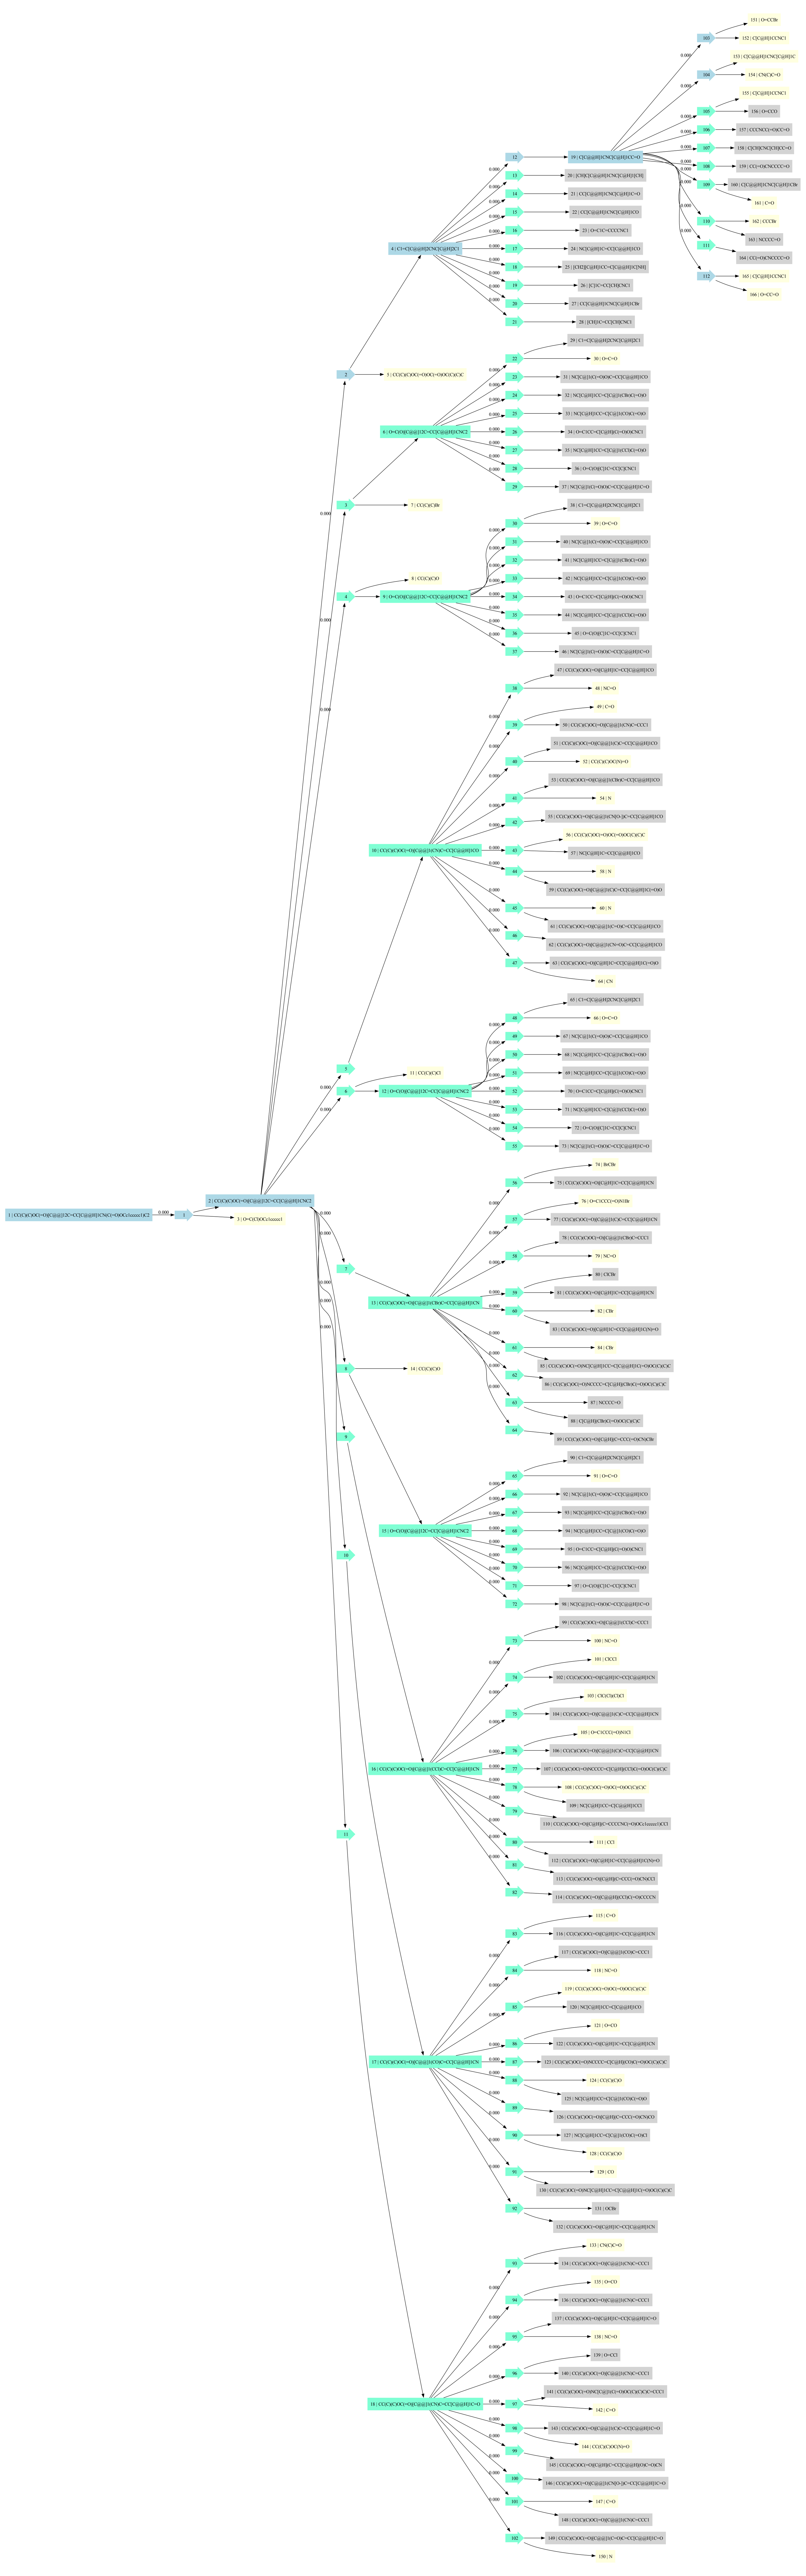

Supplement: supplementary_material [file mol_76_search_tree.pdf › materials9084/retro190_solutions/mol_76_search_tree.pdf]

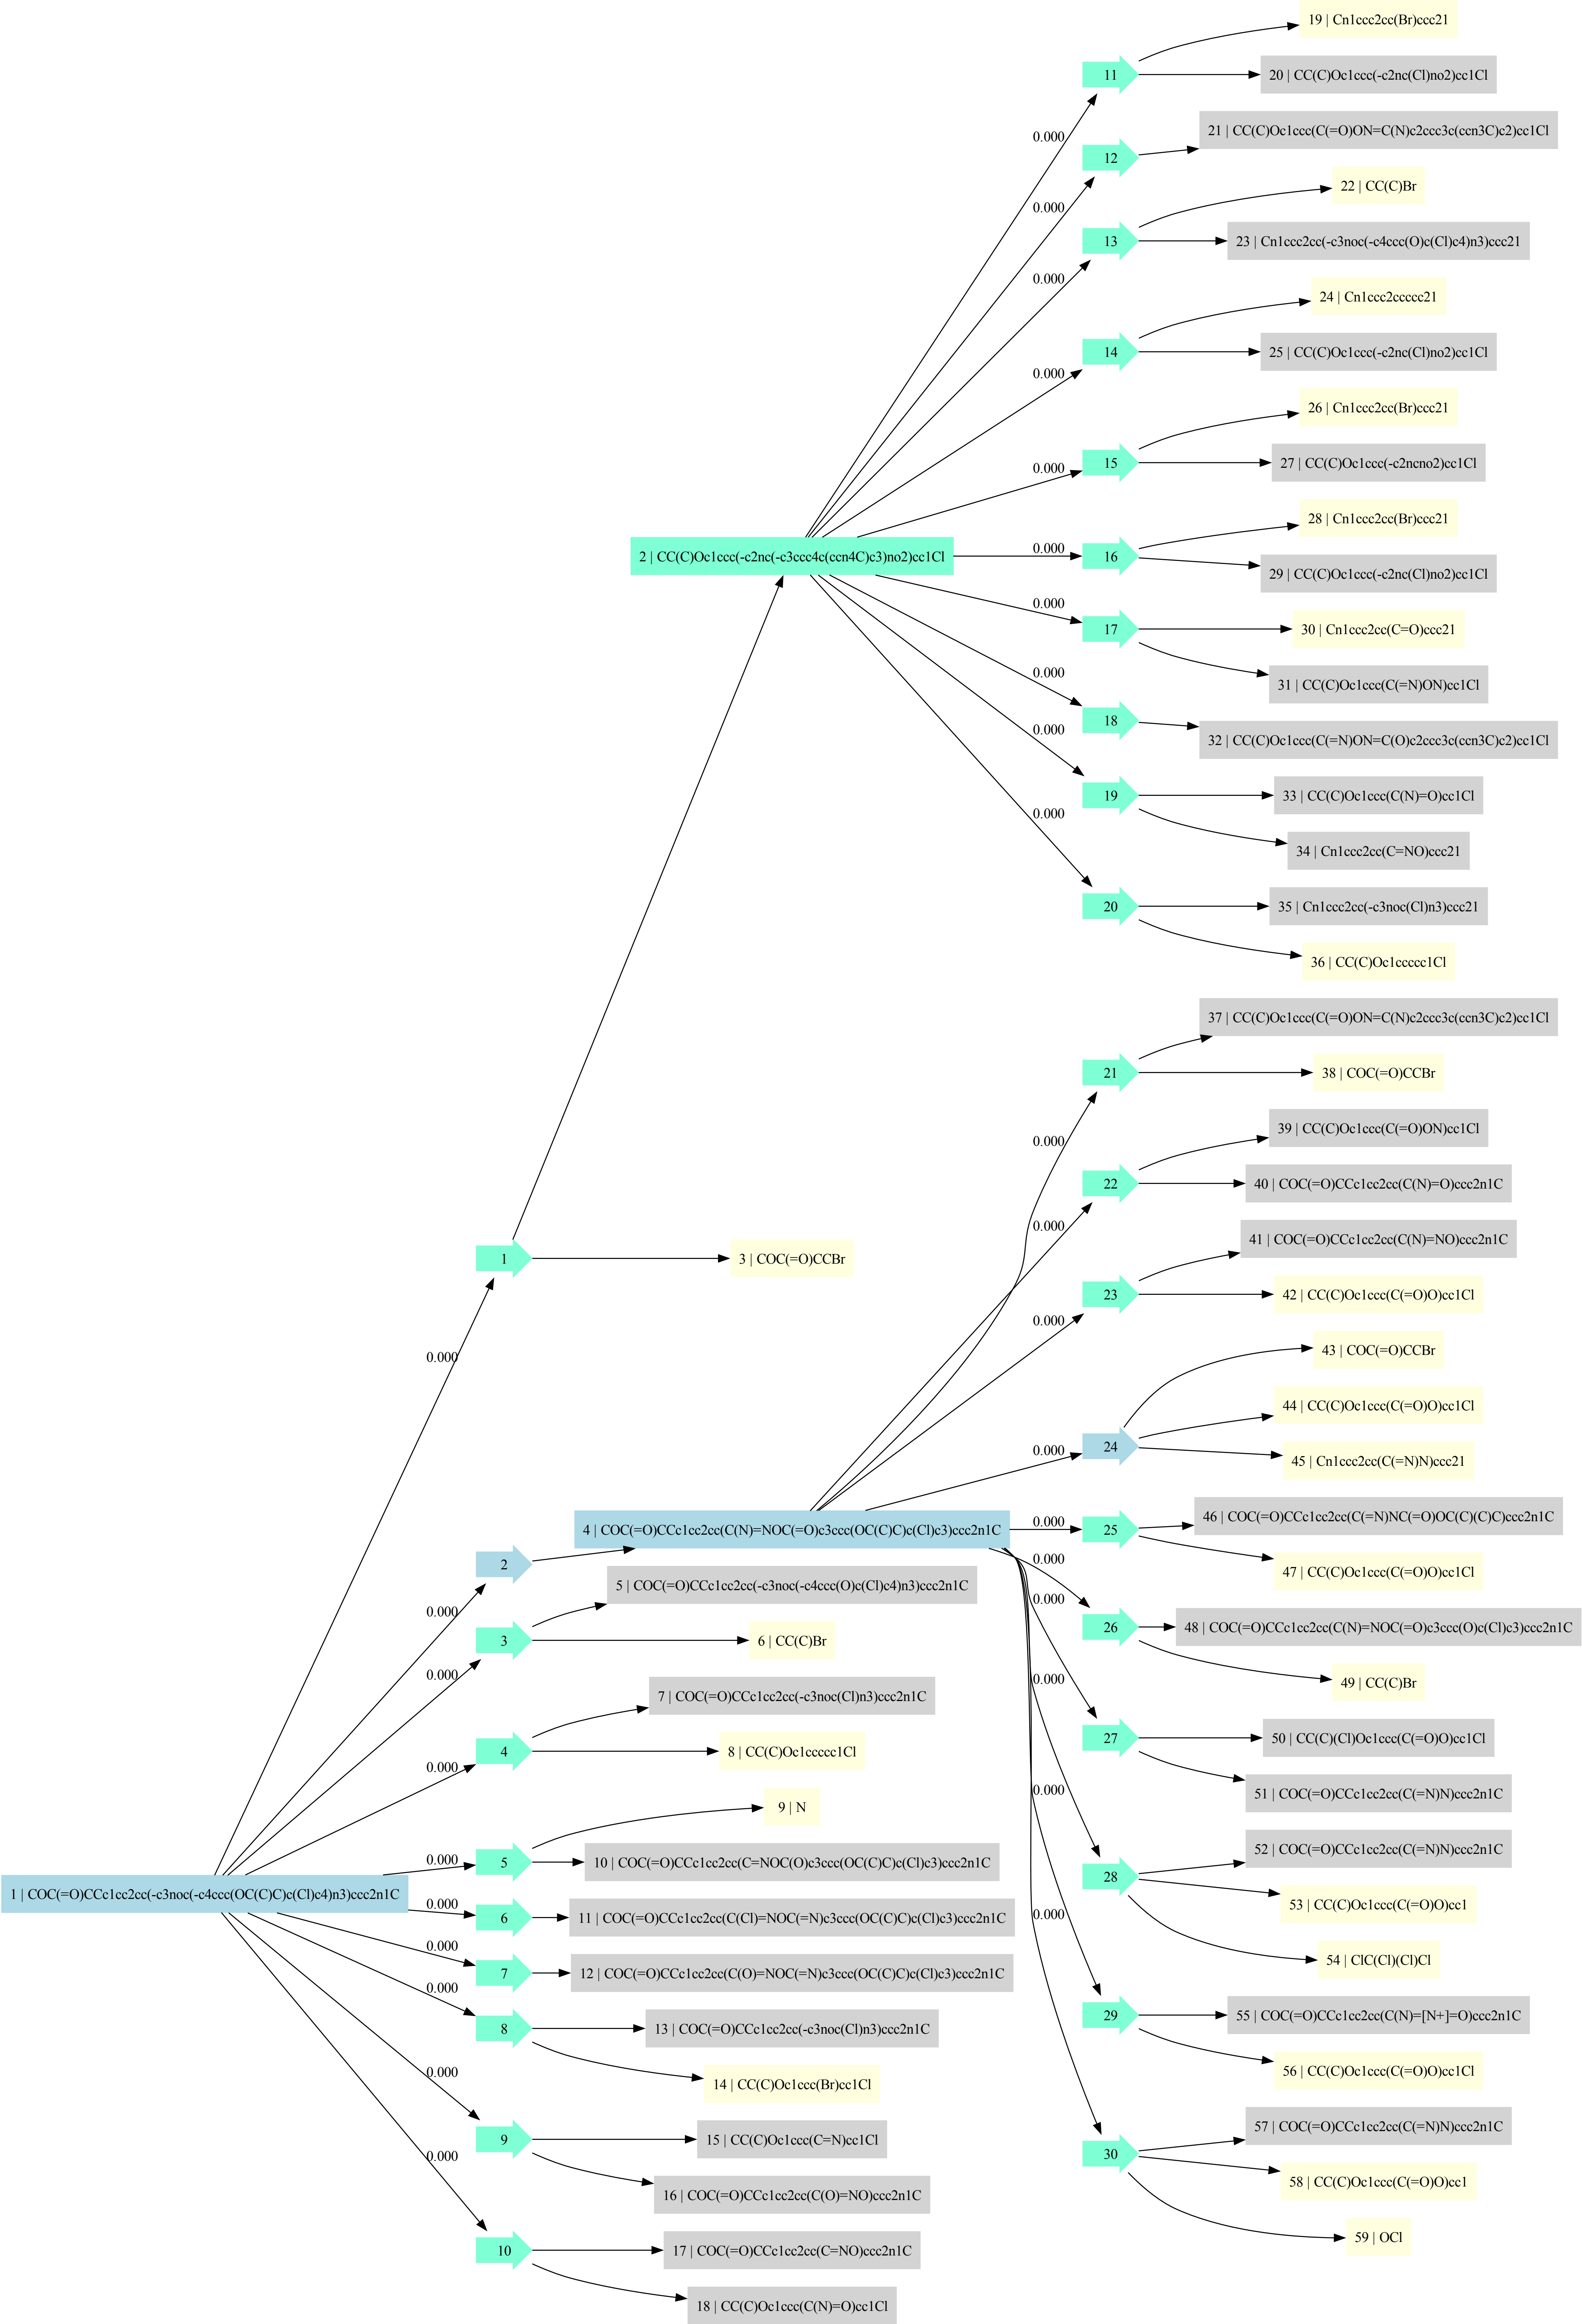

Supplement: supplementary_material [file mol_77_search_tree.pdf › materials9084/retro190_solutions/mol_77_search_tree.pdf]

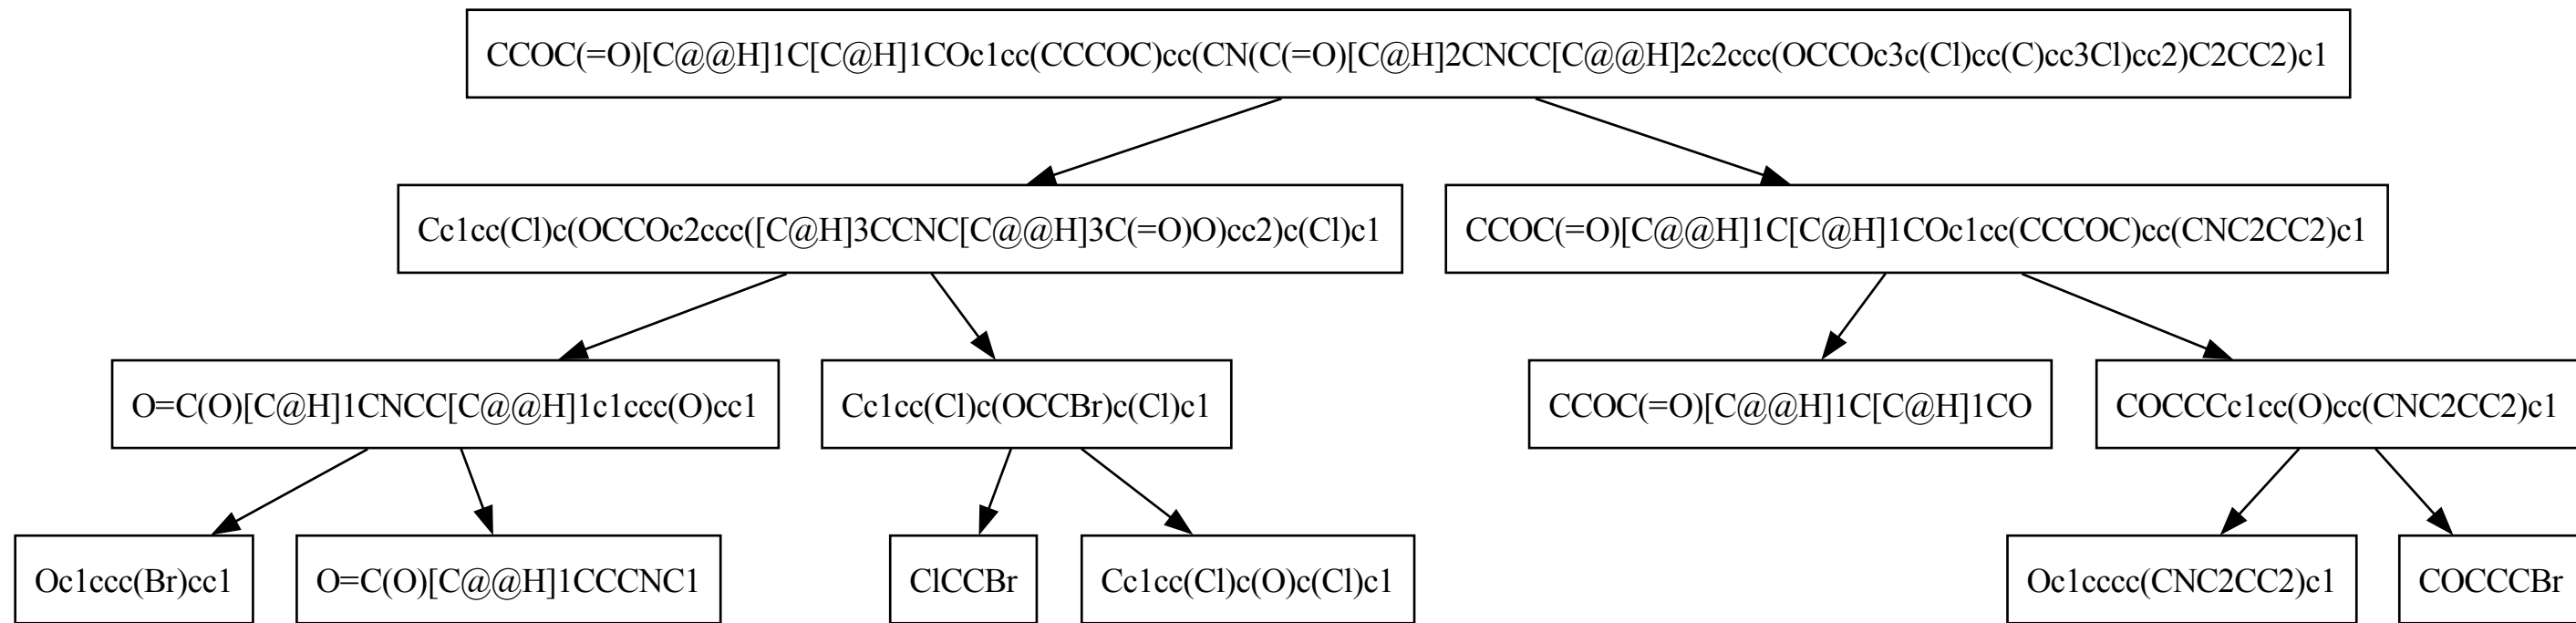

Supplement: supplementary_material [file mol_78_route_optimal.pdf › materials9084/retro190_solutions/mol_78_route_optimal.pdf]

CCOC(=O)c1cc2c(F)cccc2nc1[C@H](C)NC(=O)OC(C)(C)C

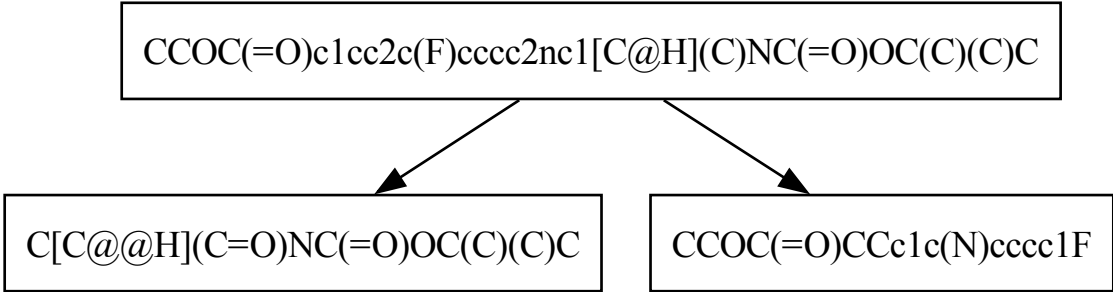

C[C@@H](C=O)NC(=O)OC(C)(C)C

CCOC(=O)CCc1c(N)cccc1F

Supplement: supplementary_material [file mol_79_route_optimal.pdf › materials9084/retro190_solutions/mol_79_route_optimal.pdf]

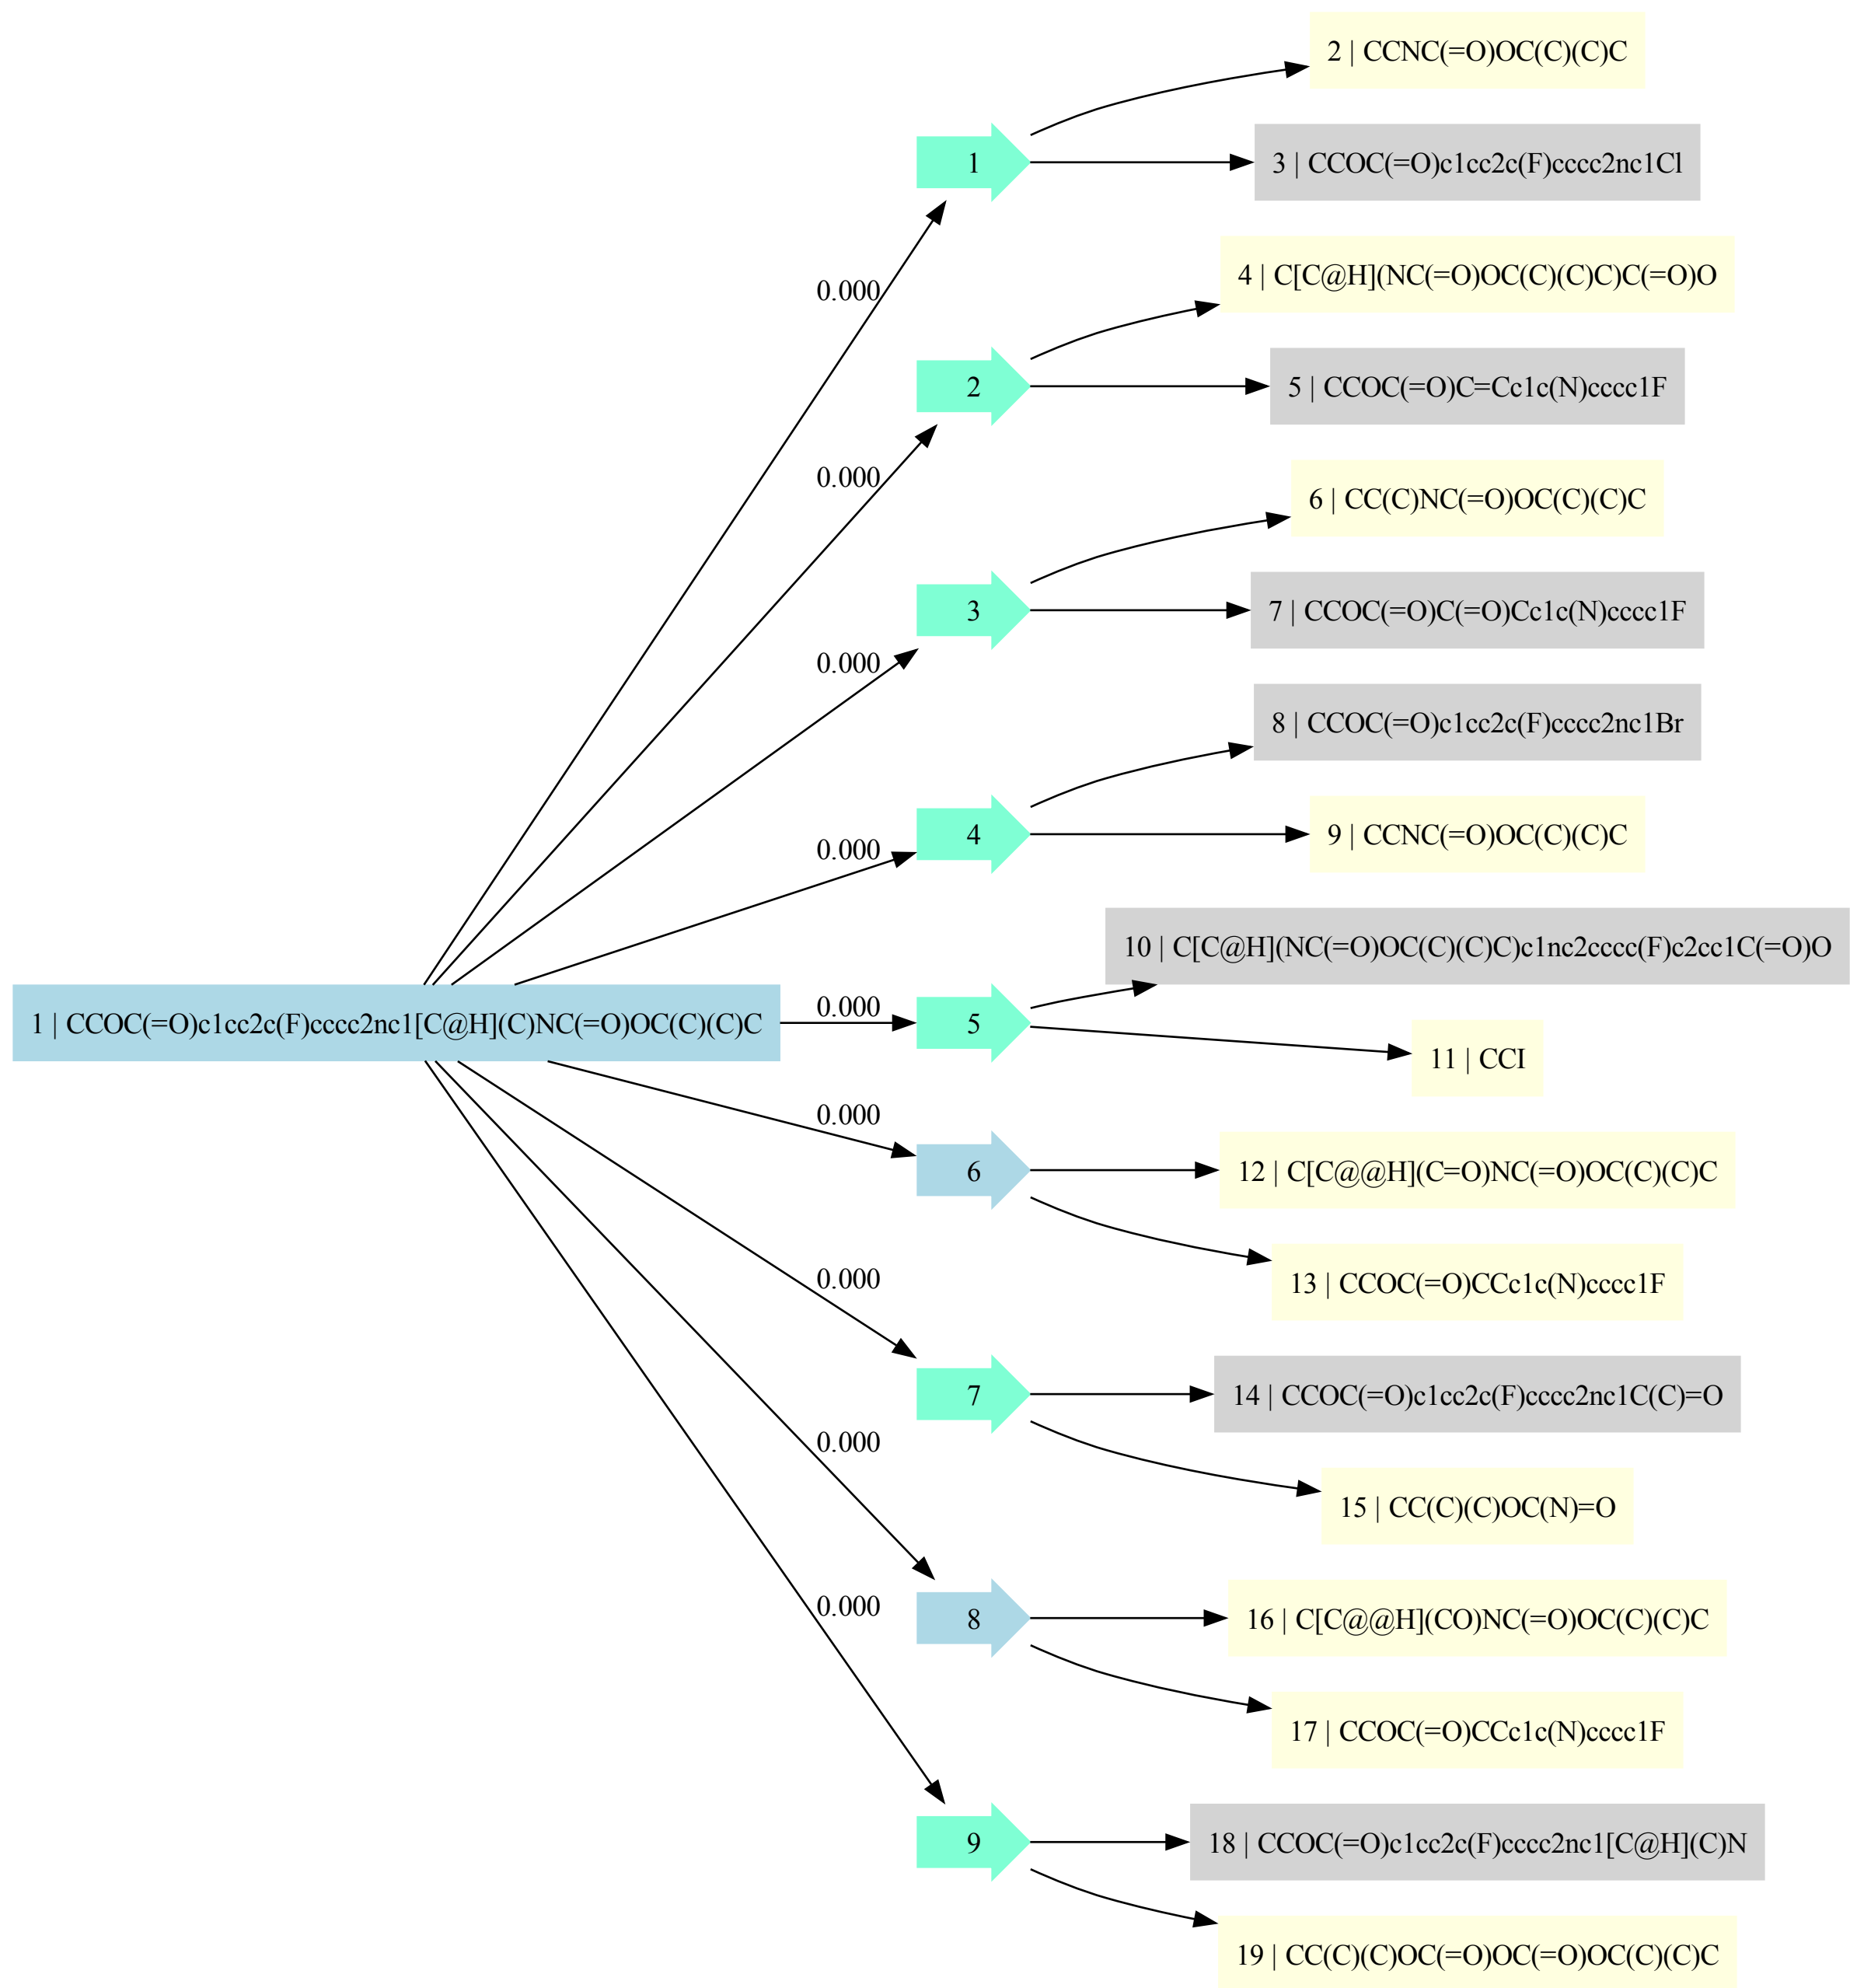

Supplement: supplementary_material [file mol_79_search_tree.pdf › materials9084/retro190_solutions/mol_79_search_tree.pdf]

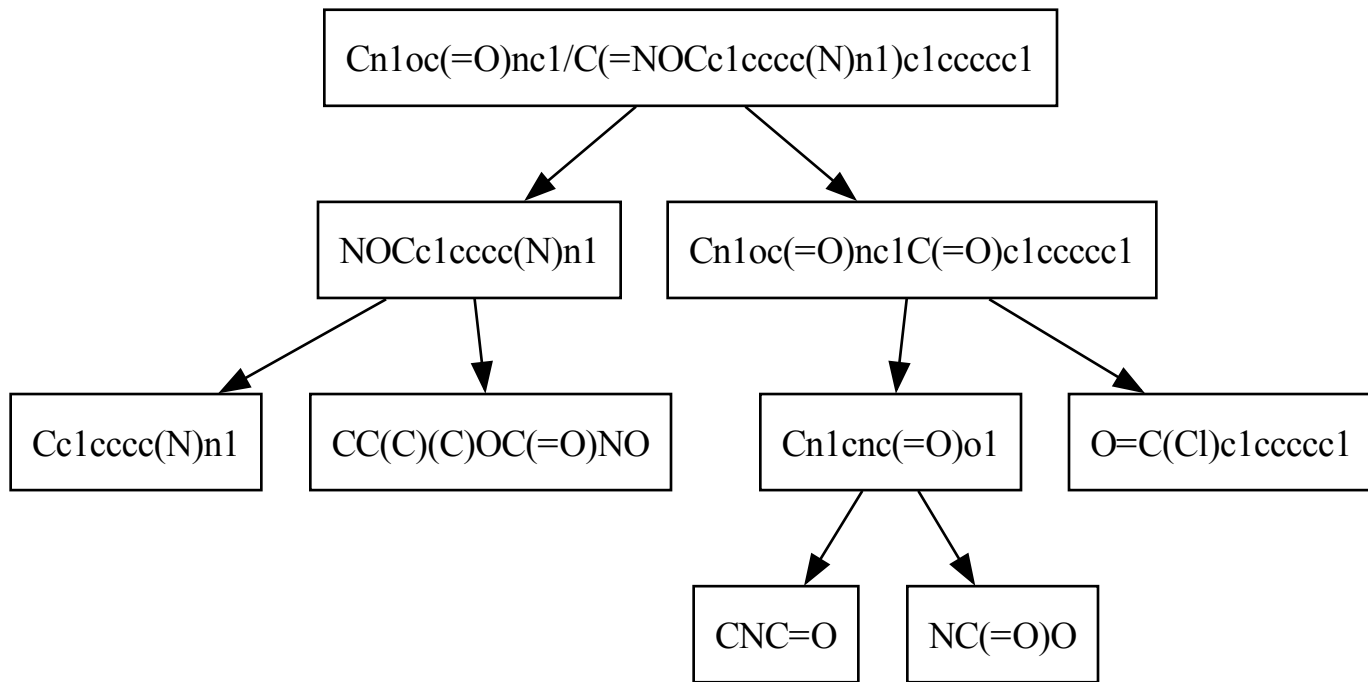

Supplement: supplementary_material [file mol_7_route_optimal.pdf › materials9084/retro190_solutions/mol_7_route_optimal.pdf]

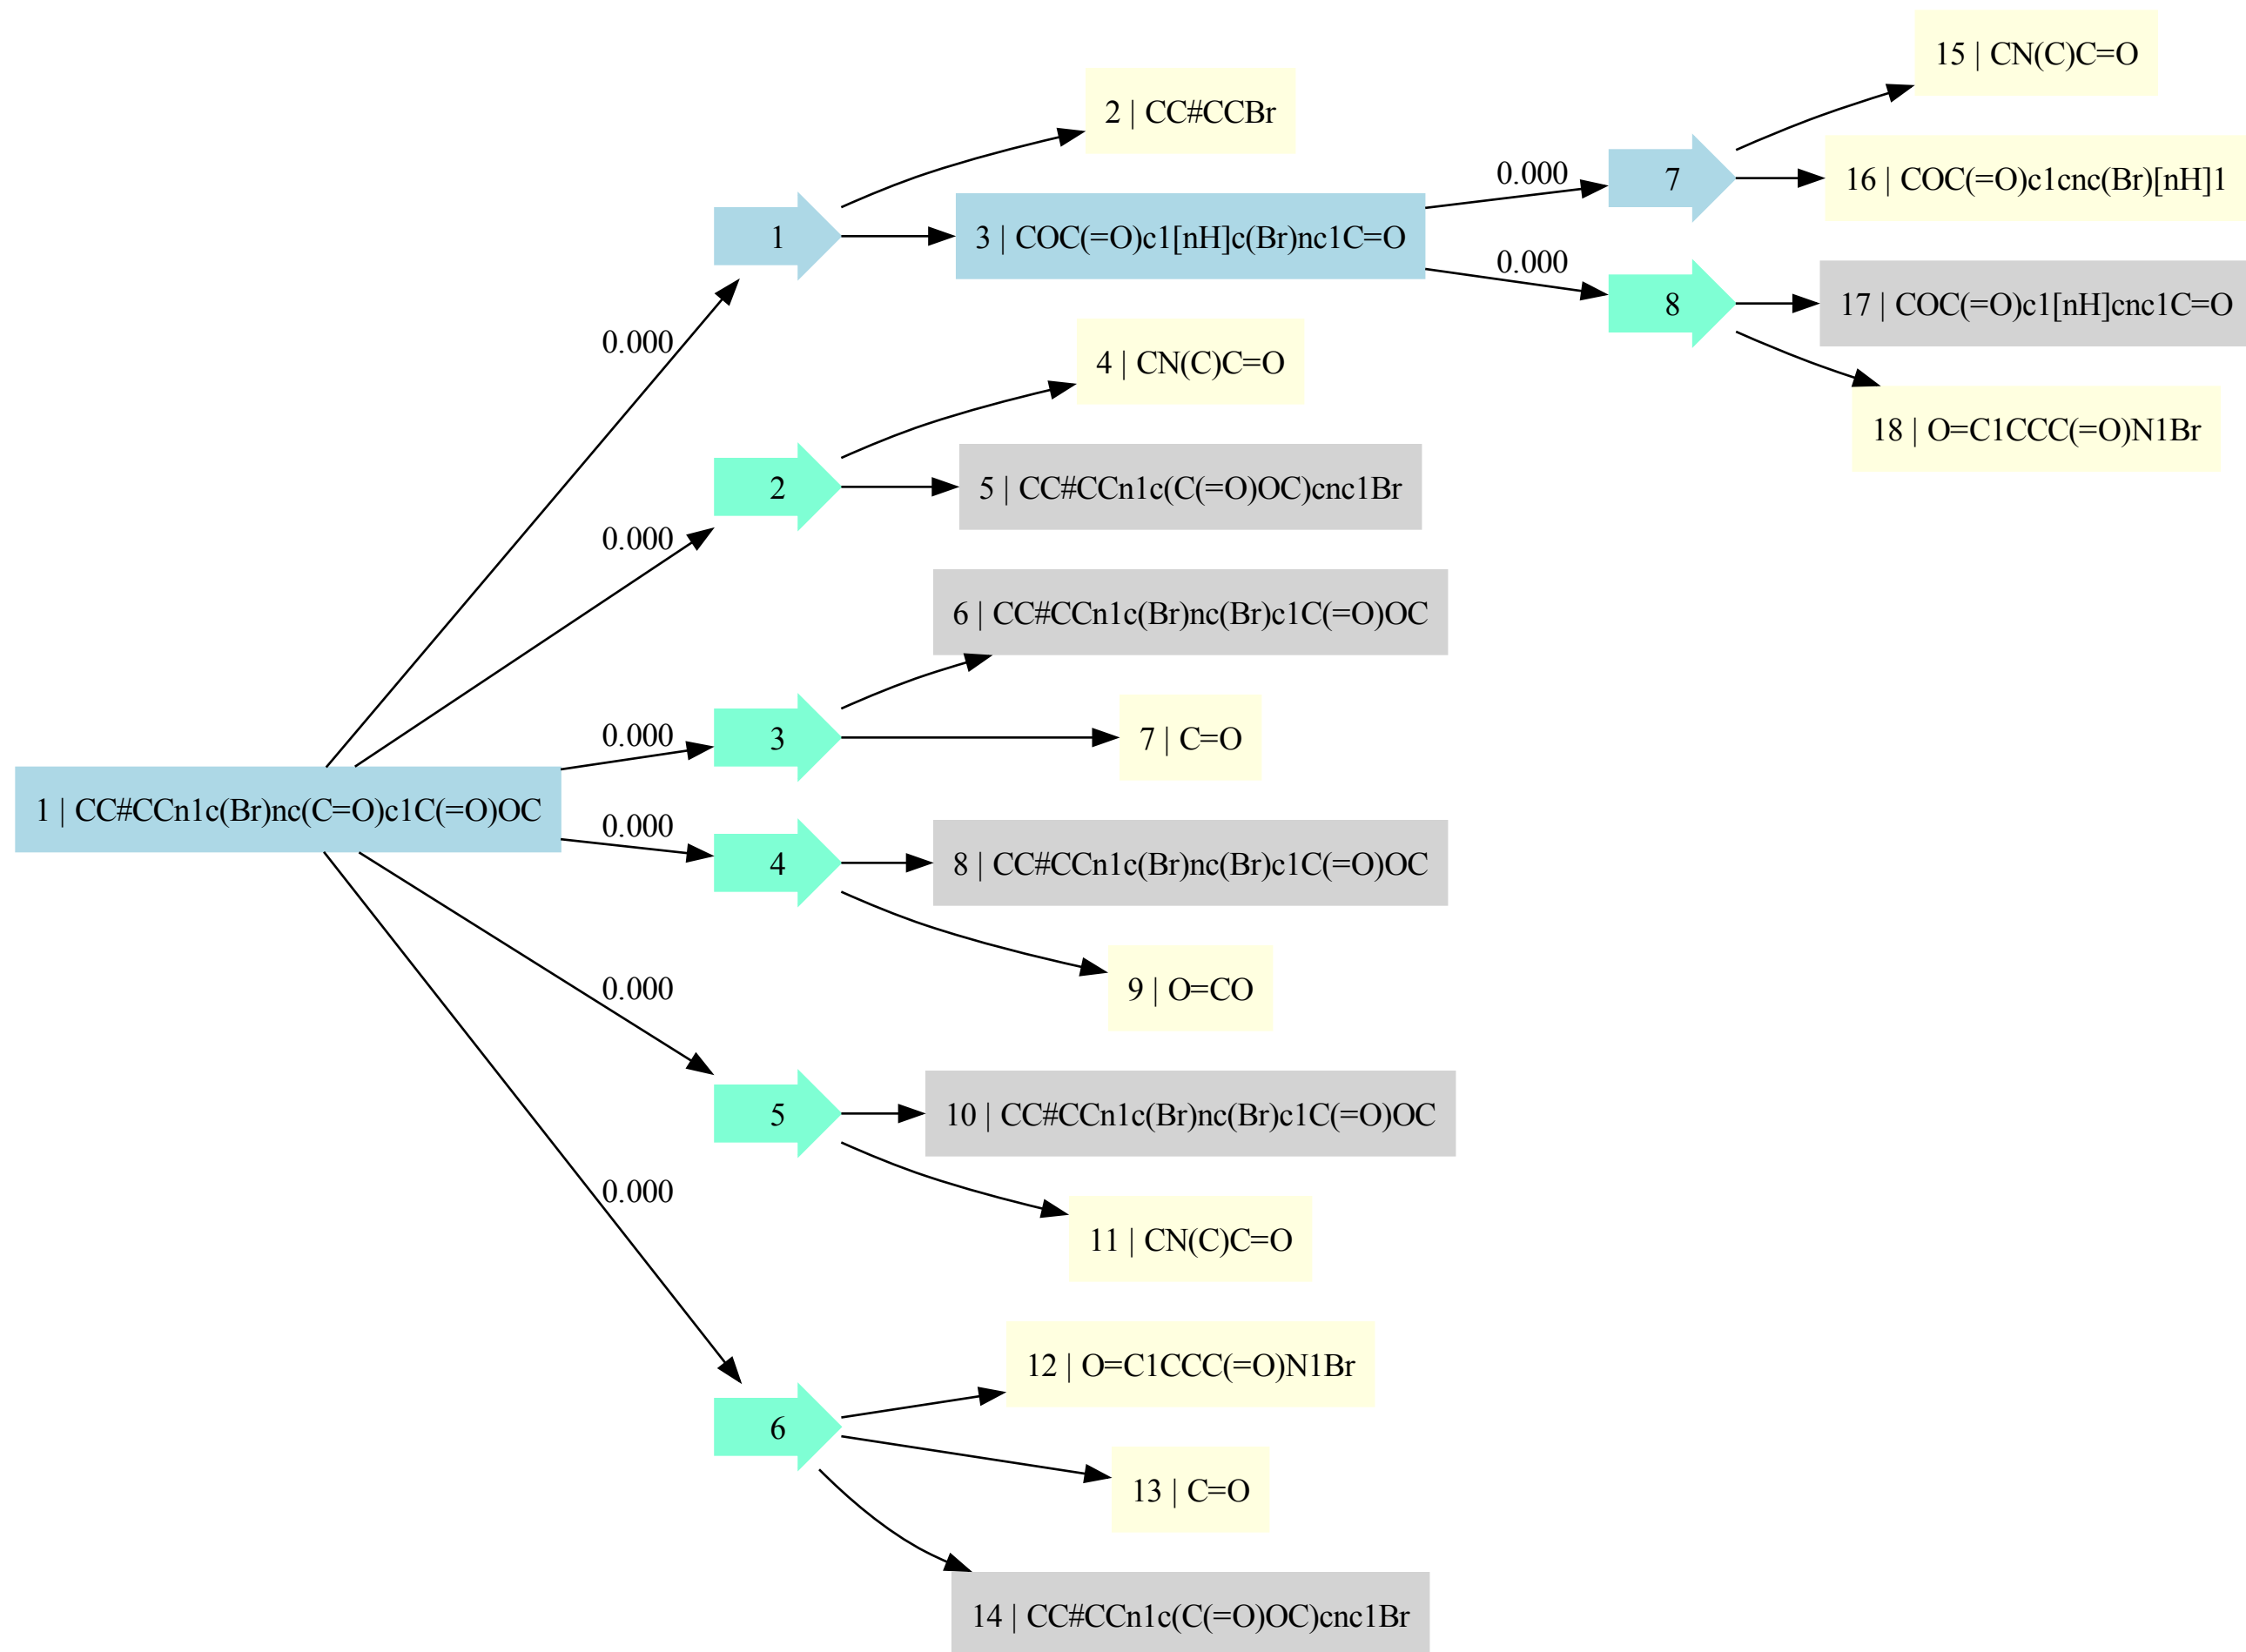

Supplement: supplementary_material [file mol_80_search_tree.pdf › materials9084/retro190_solutions/mol_80_search_tree.pdf]

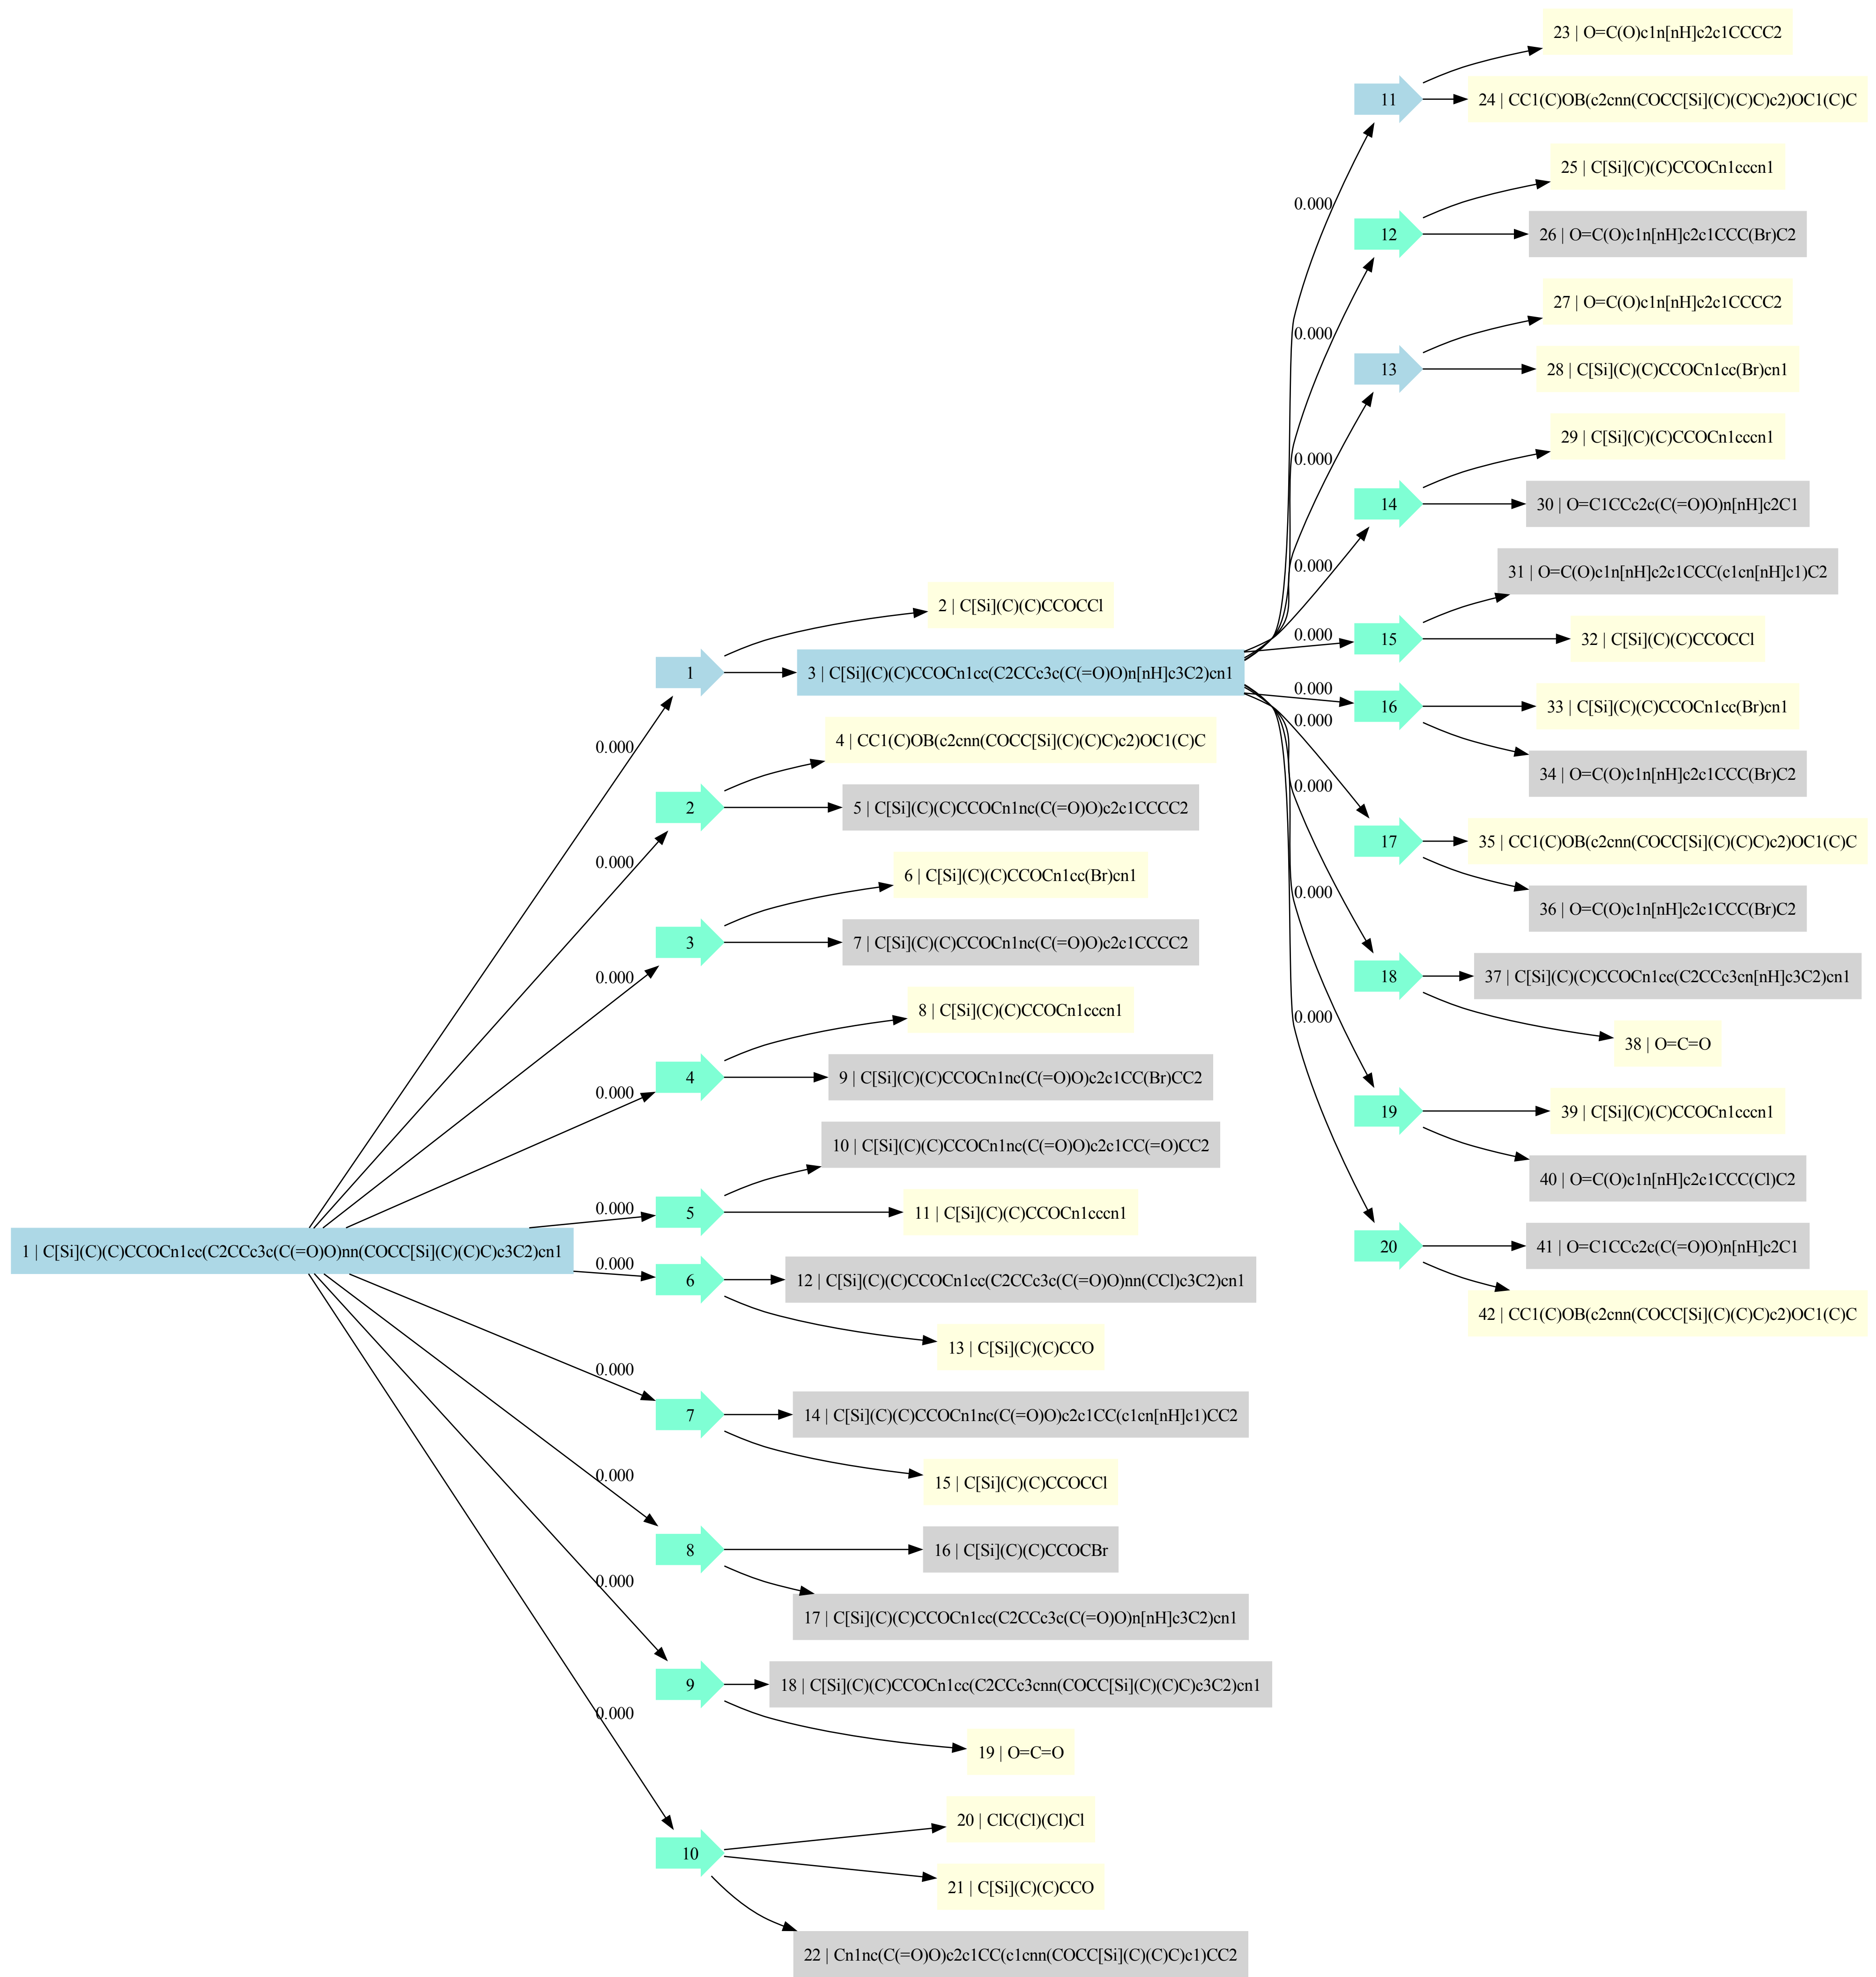

Supplement: supplementary_material [file mol_81_search_tree.pdf › materials9084/retro190_solutions/mol_81_search_tree.pdf]

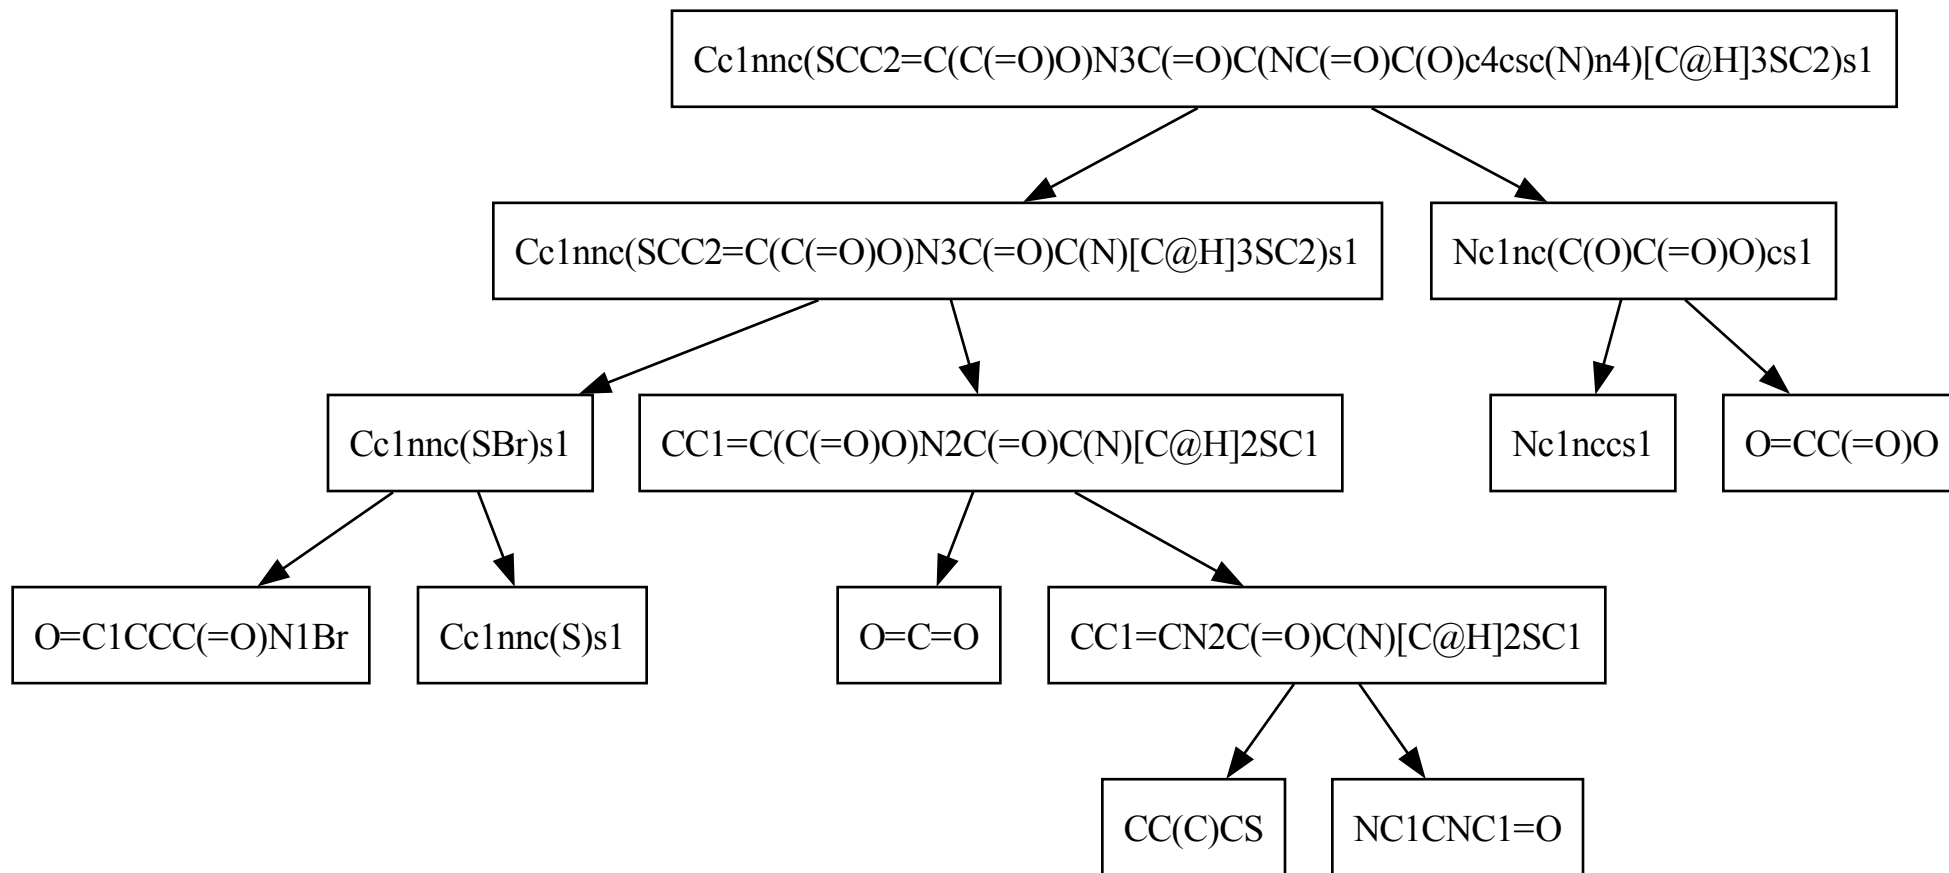

Supplement: supplementary_material [file mol_82_route_optimal.pdf › materials9084/retro190_solutions/mol_82_route_optimal.pdf]

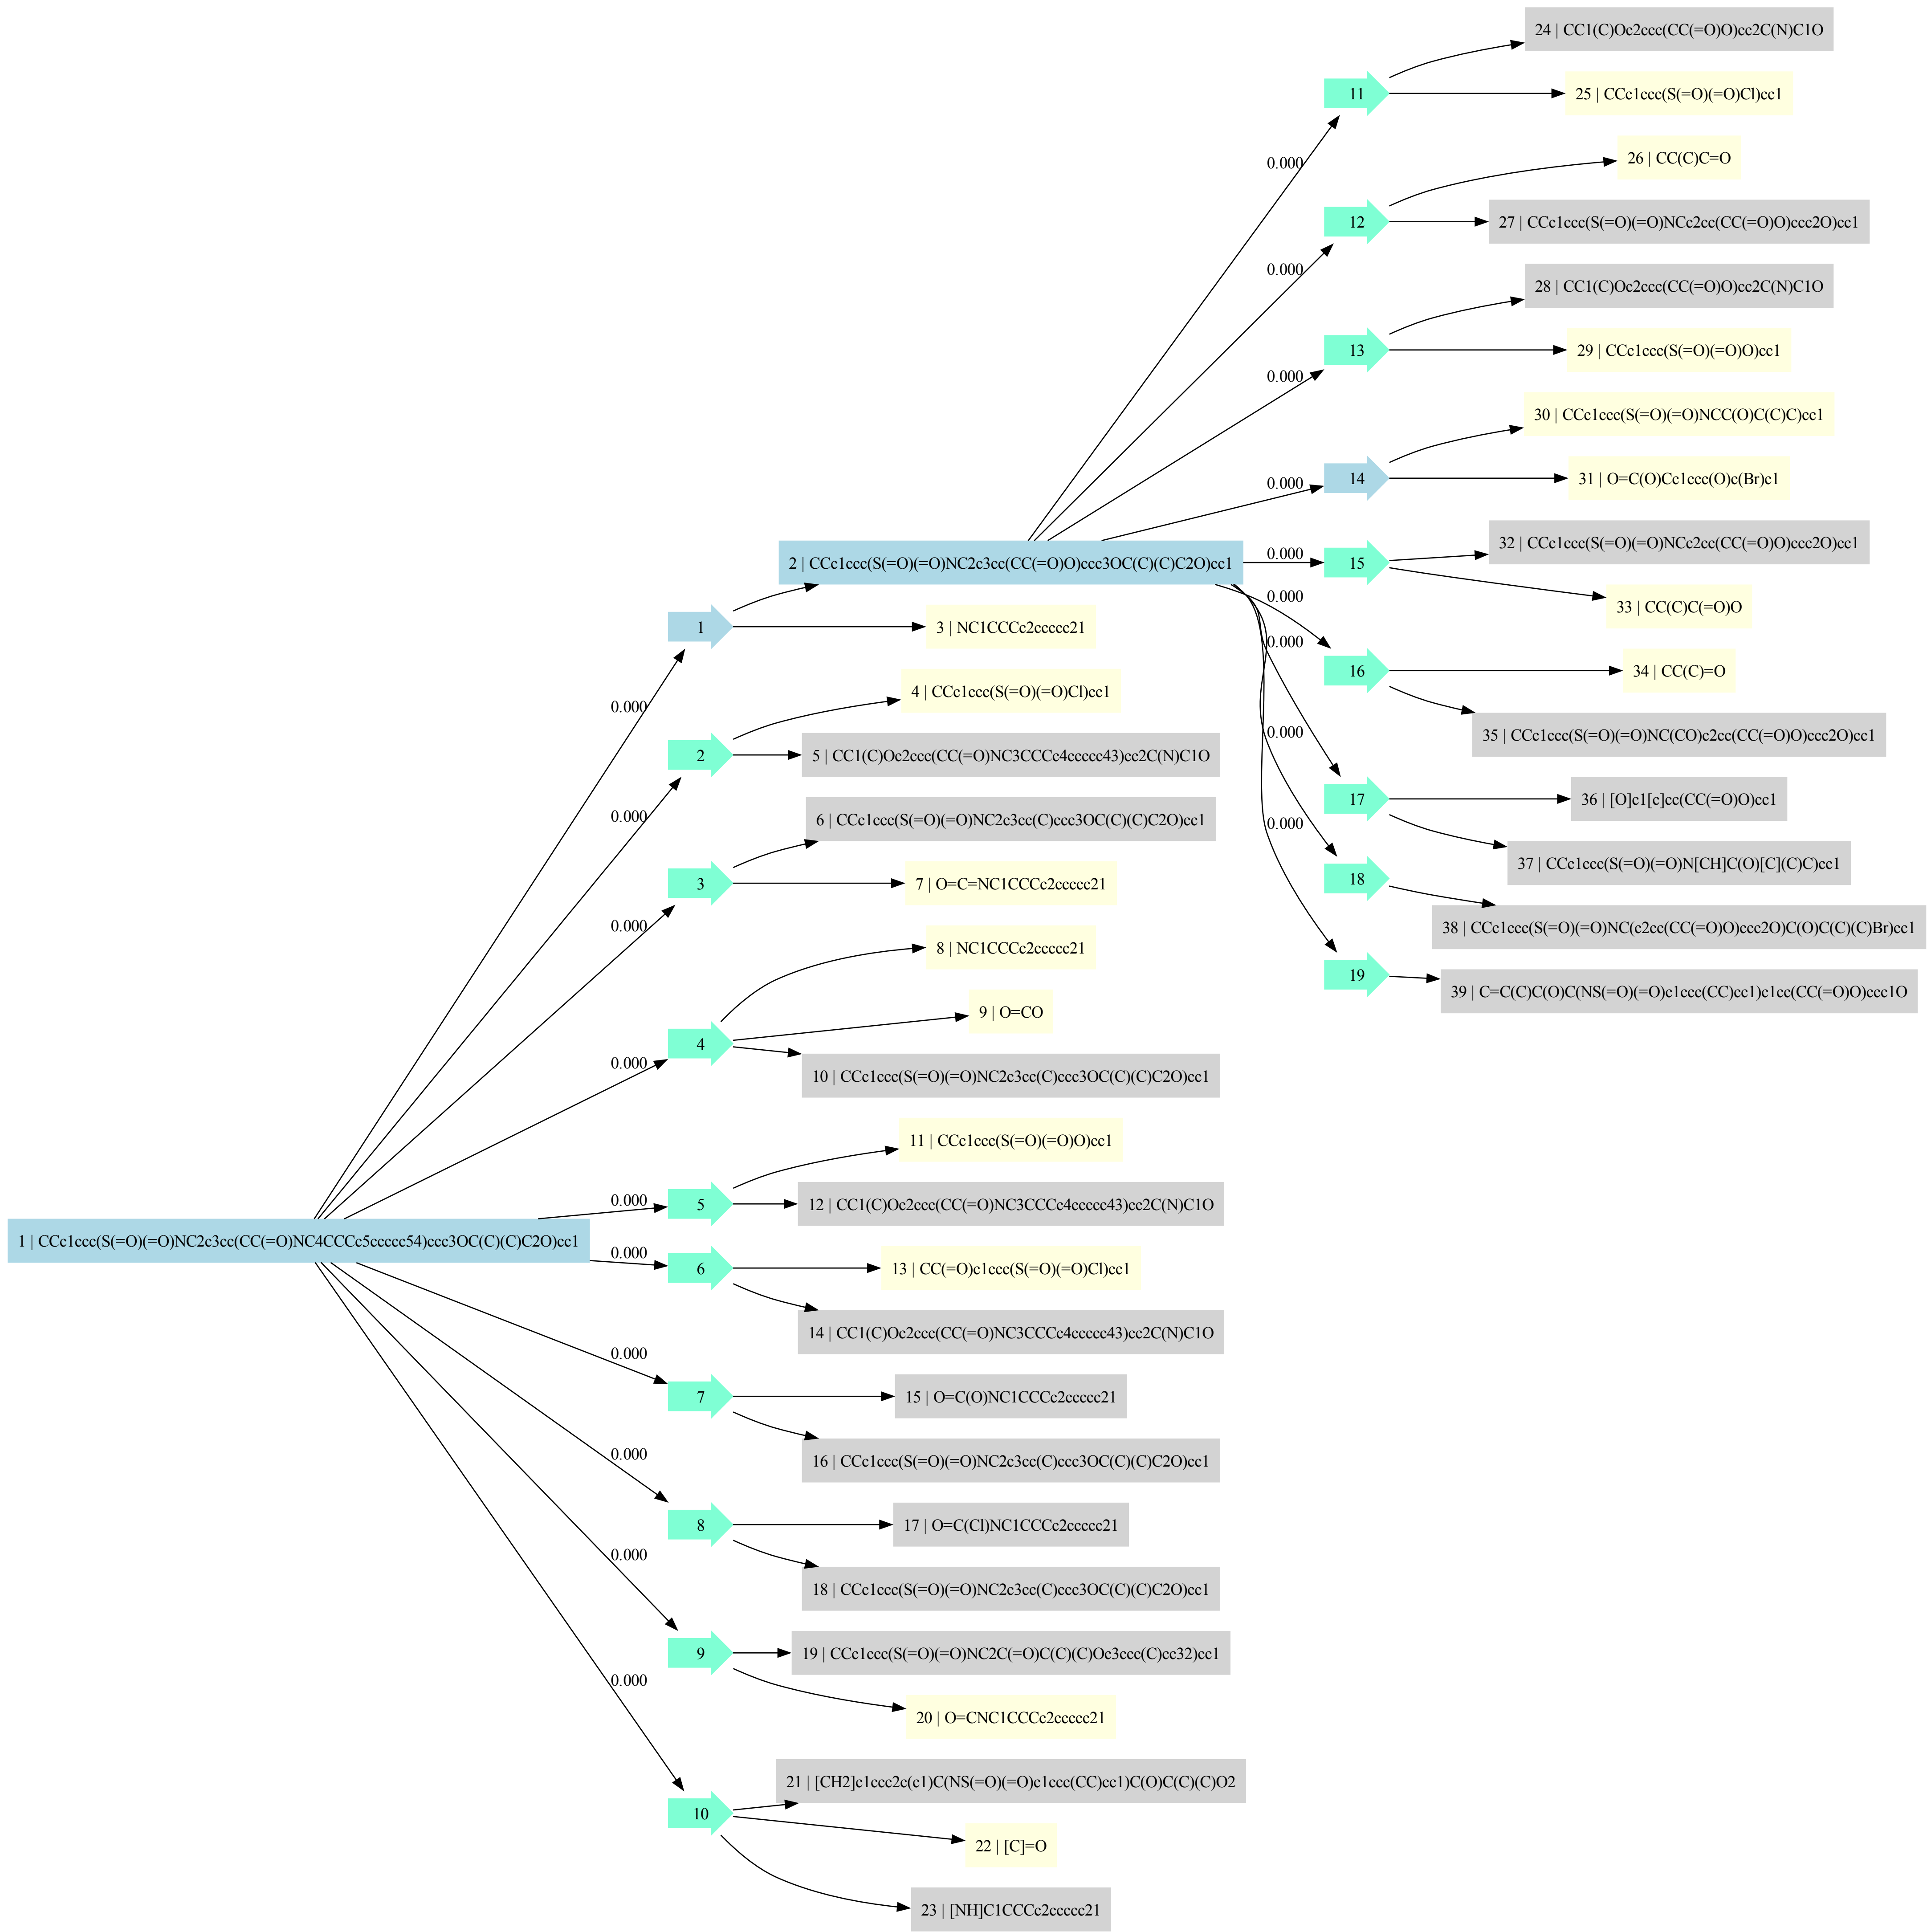

Supplement: supplementary_material [file mol_83_search_tree.pdf › materials9084/retro190_solutions/mol_83_search_tree.pdf]

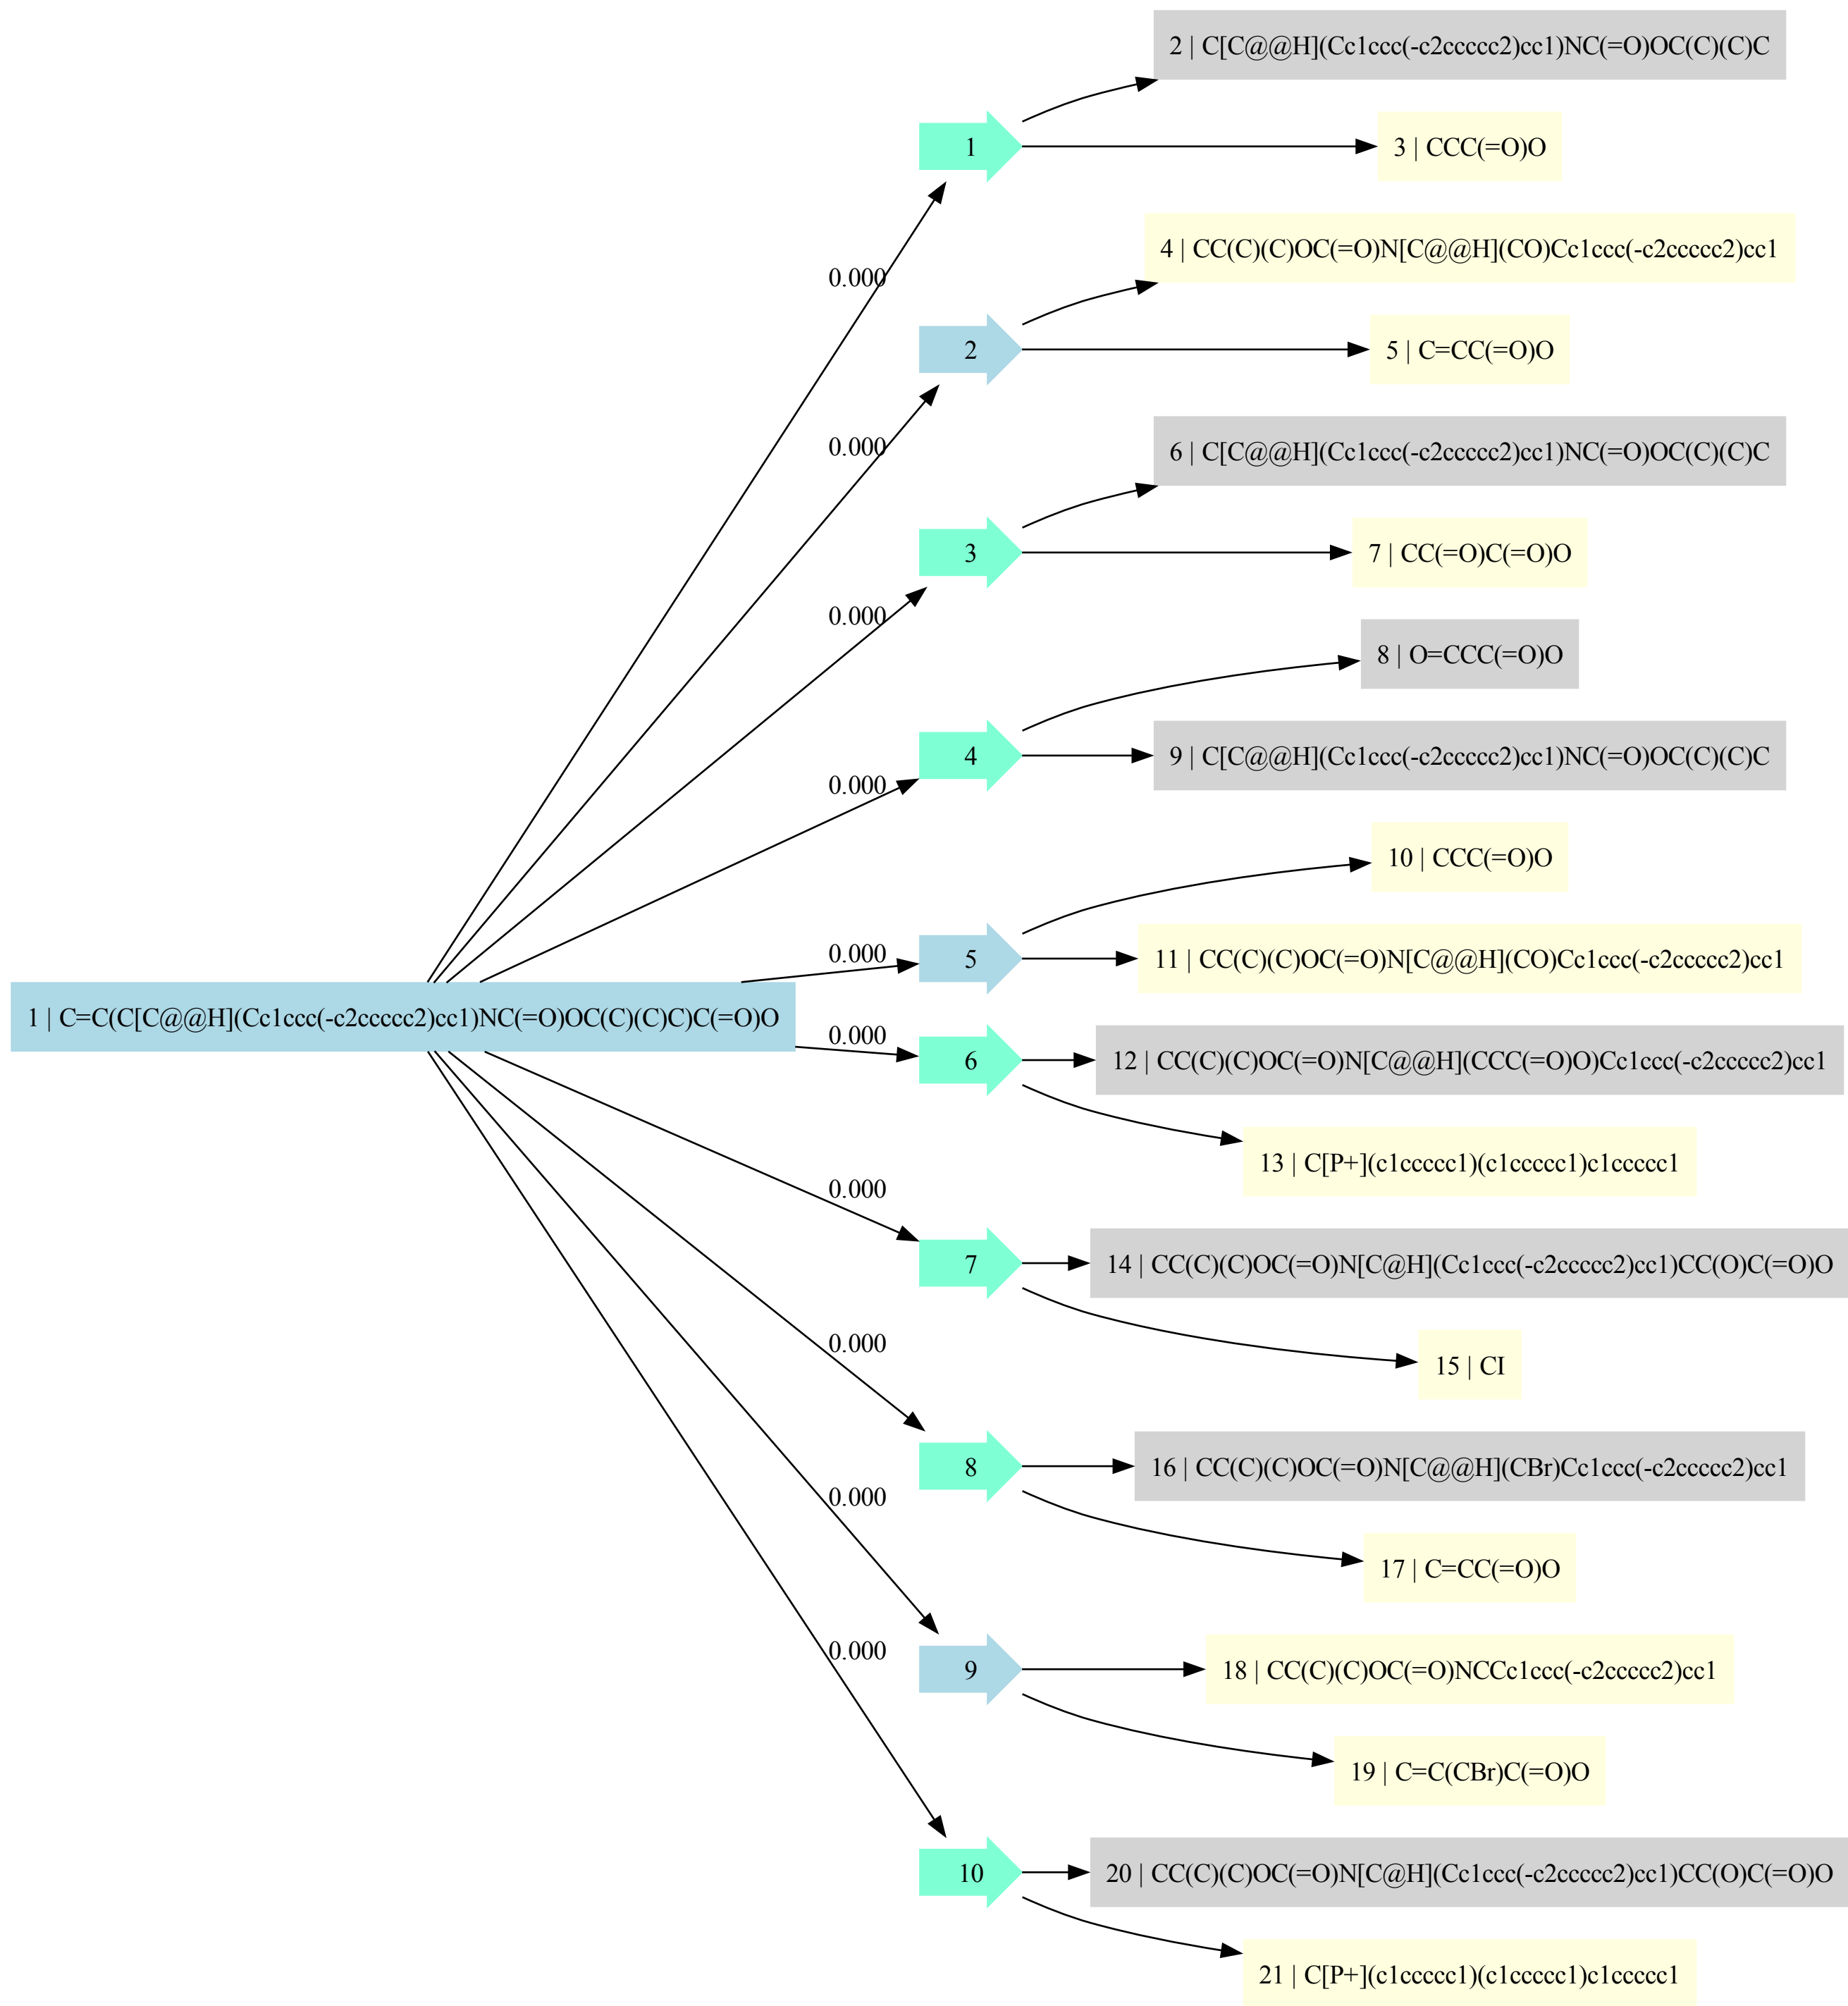

Supplement: supplementary_material [file mol_84_search_tree.pdf › materials9084/retro190_solutions/mol_84_search_tree.pdf]

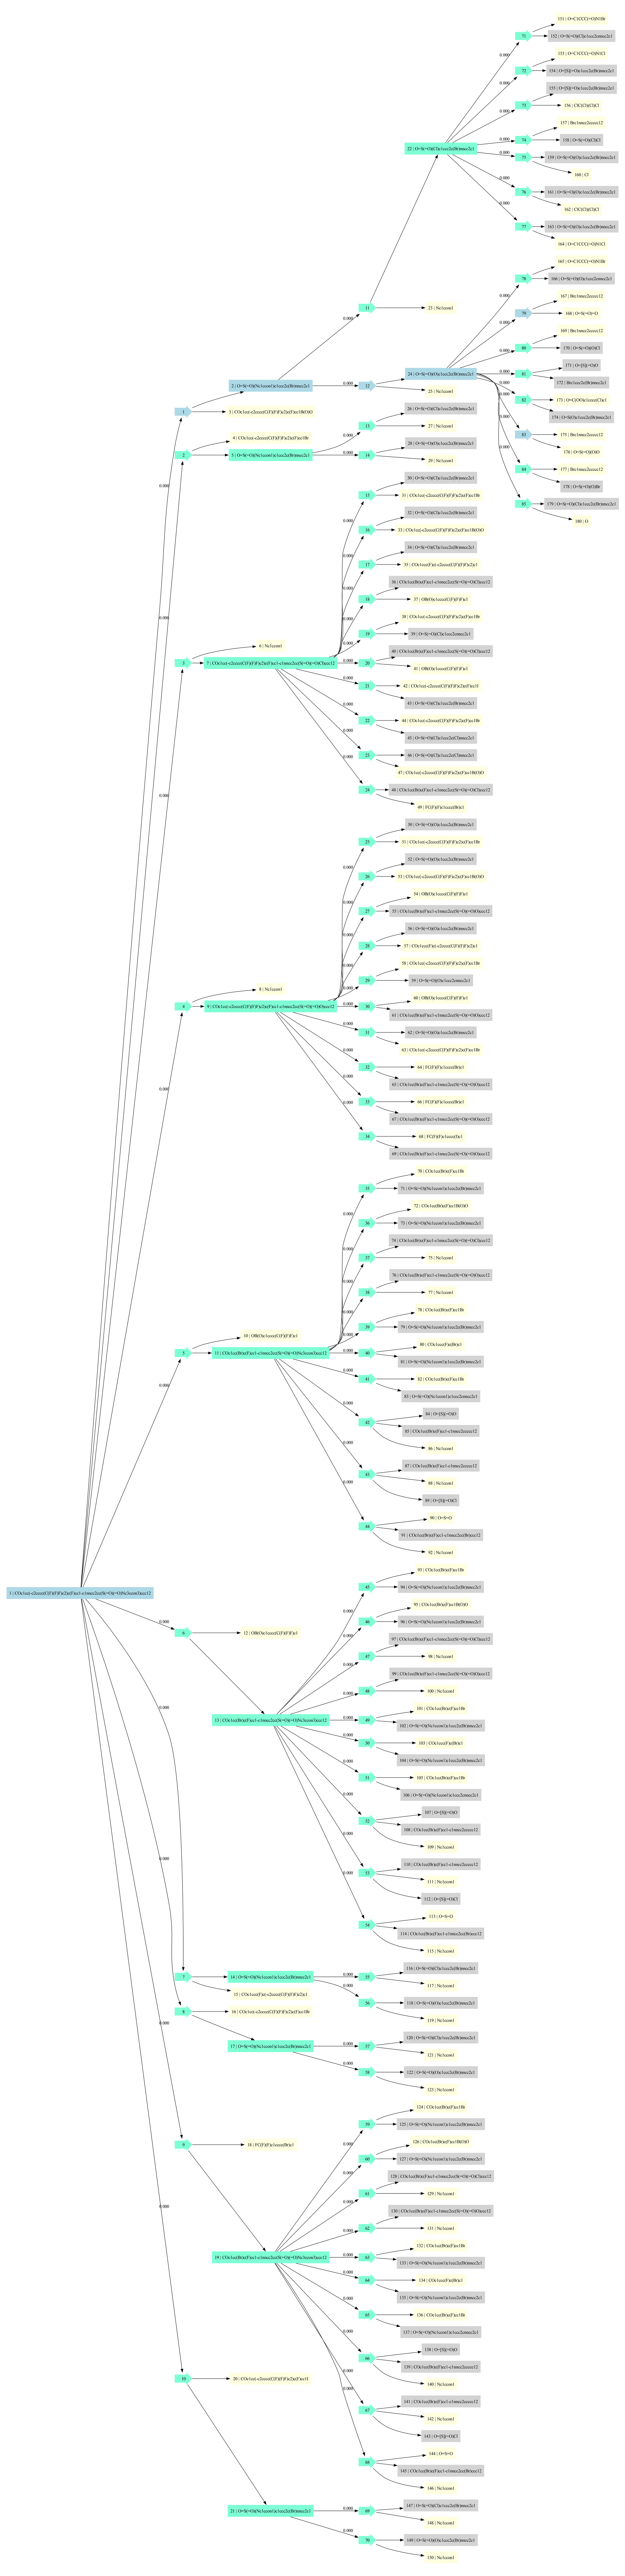

Supplement: supplementary_material [file mol_86_search_tree.pdf › materials9084/retro190_solutions/mol_86_search_tree.pdf]

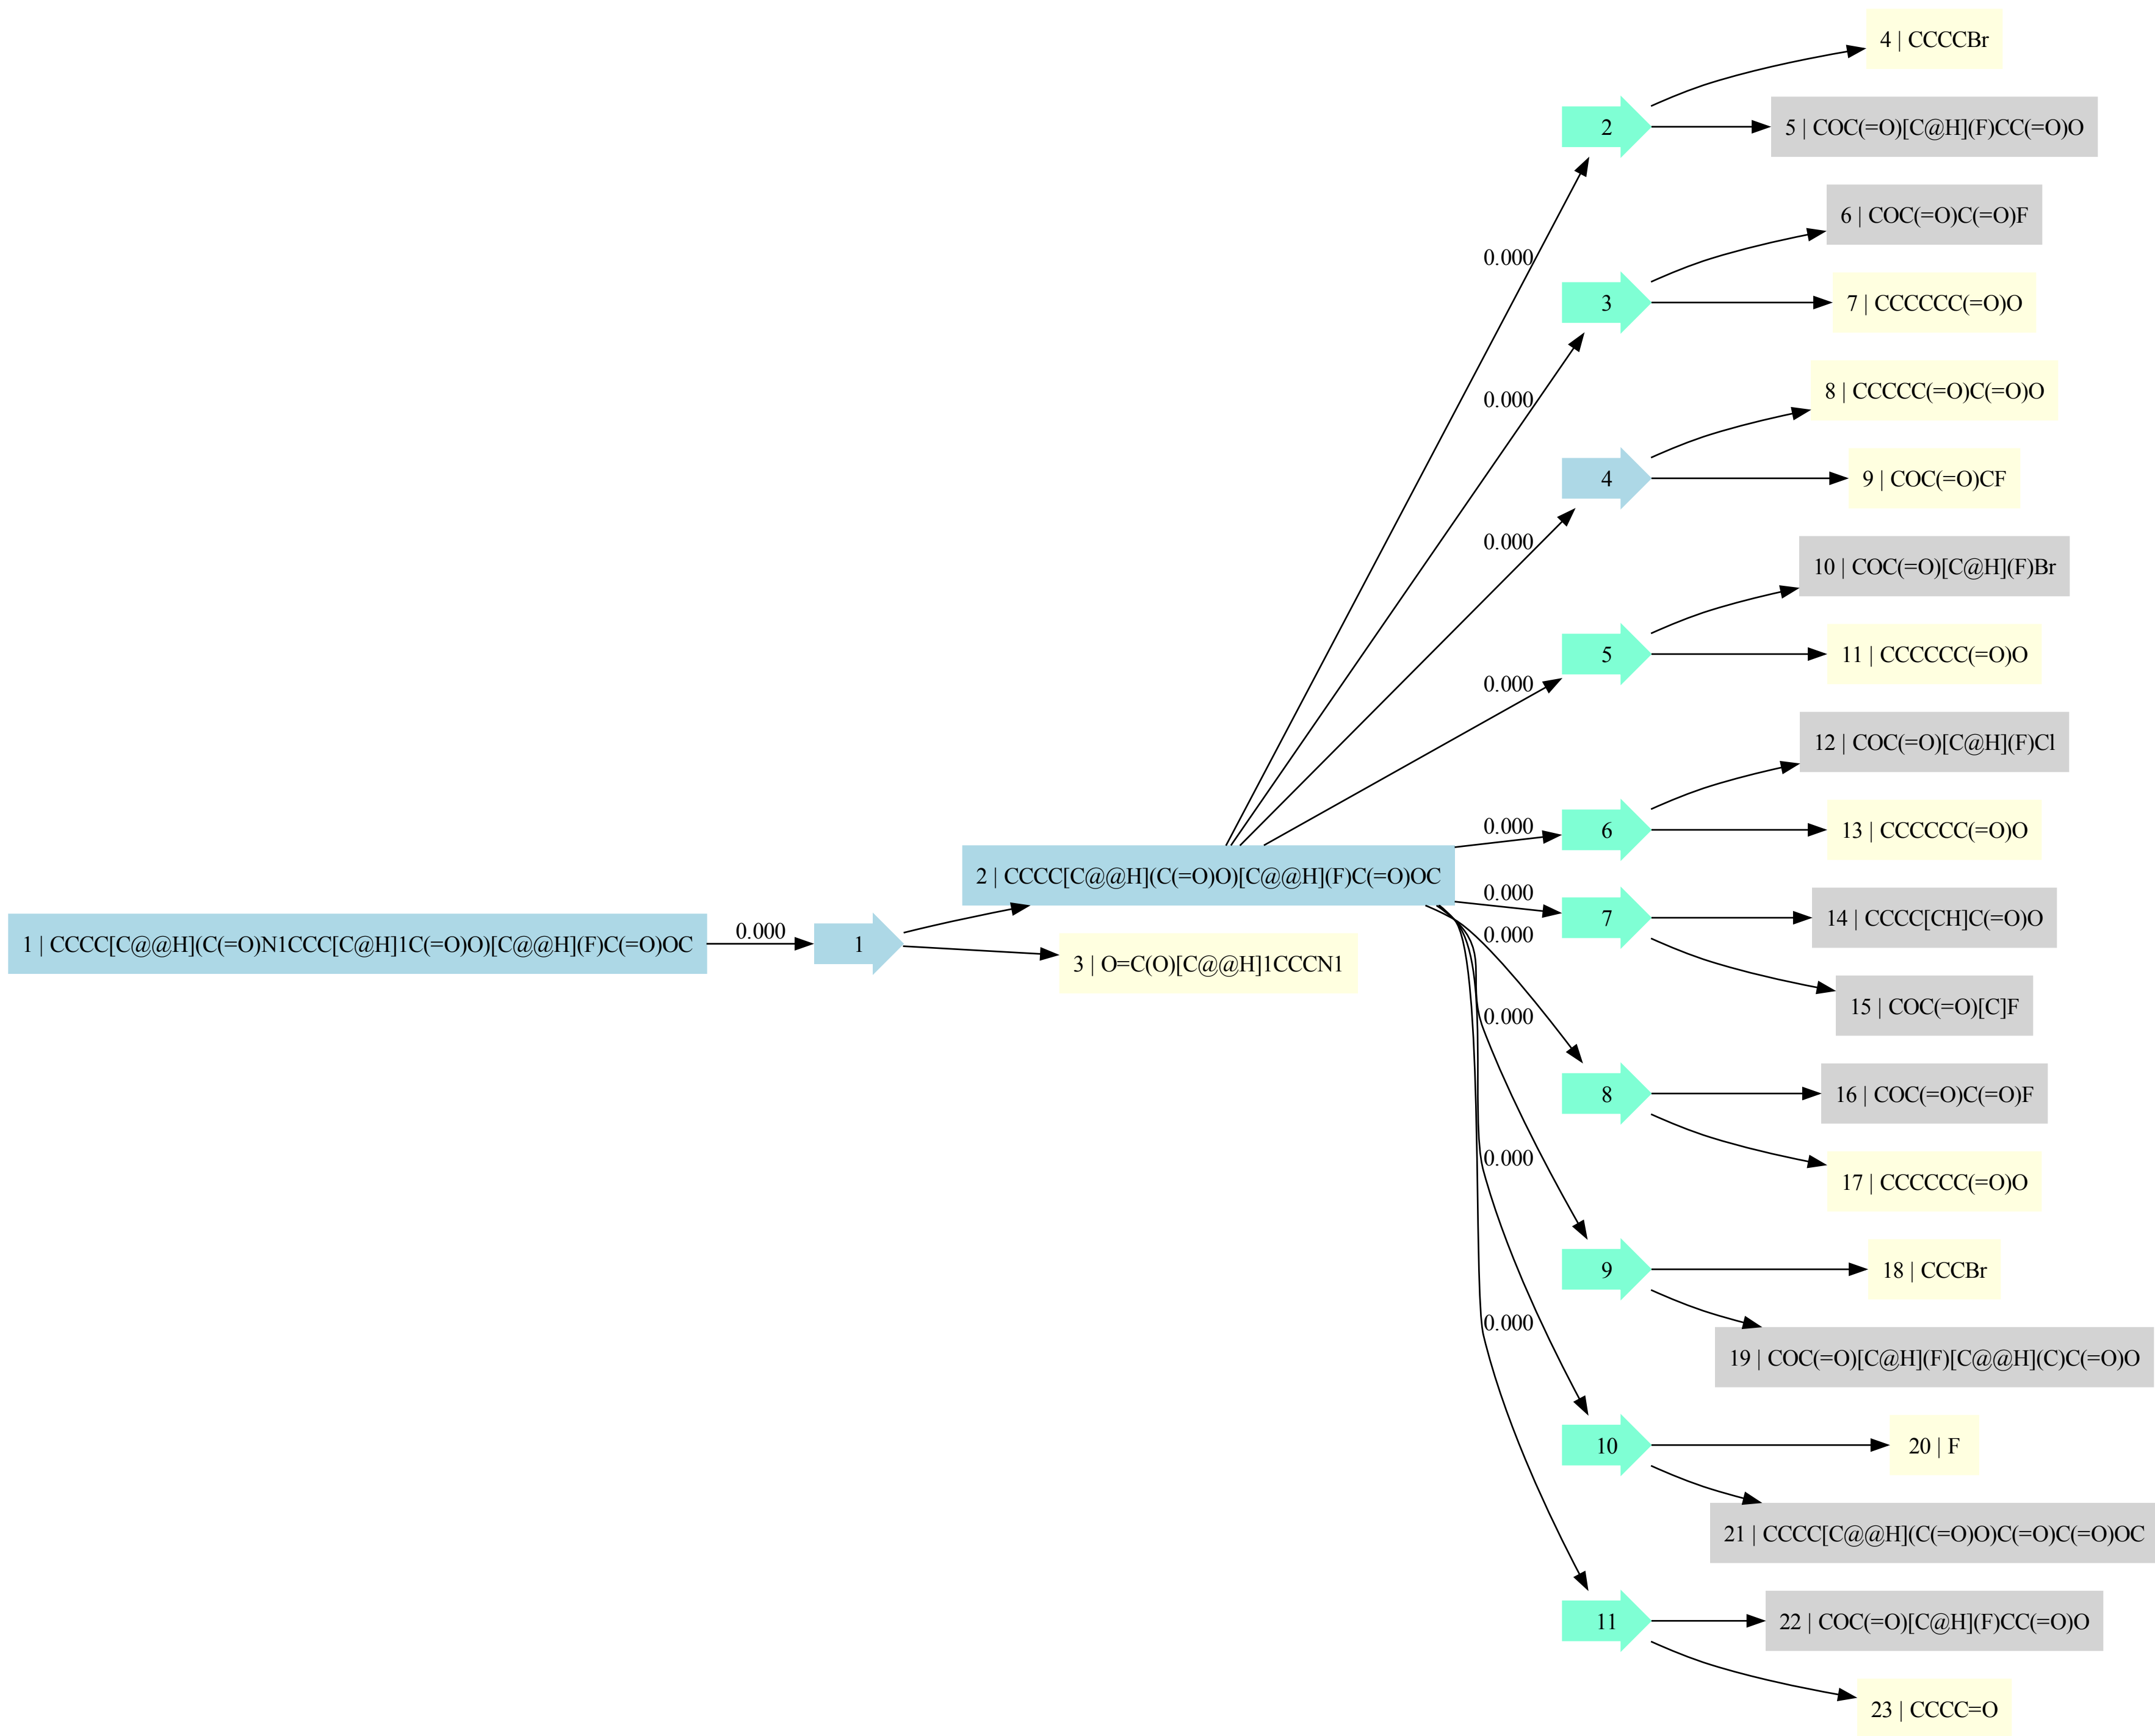

Supplement: supplementary_material [file mol_87_search_tree.pdf › materials9084/retro190_solutions/mol_87_search_tree.pdf]

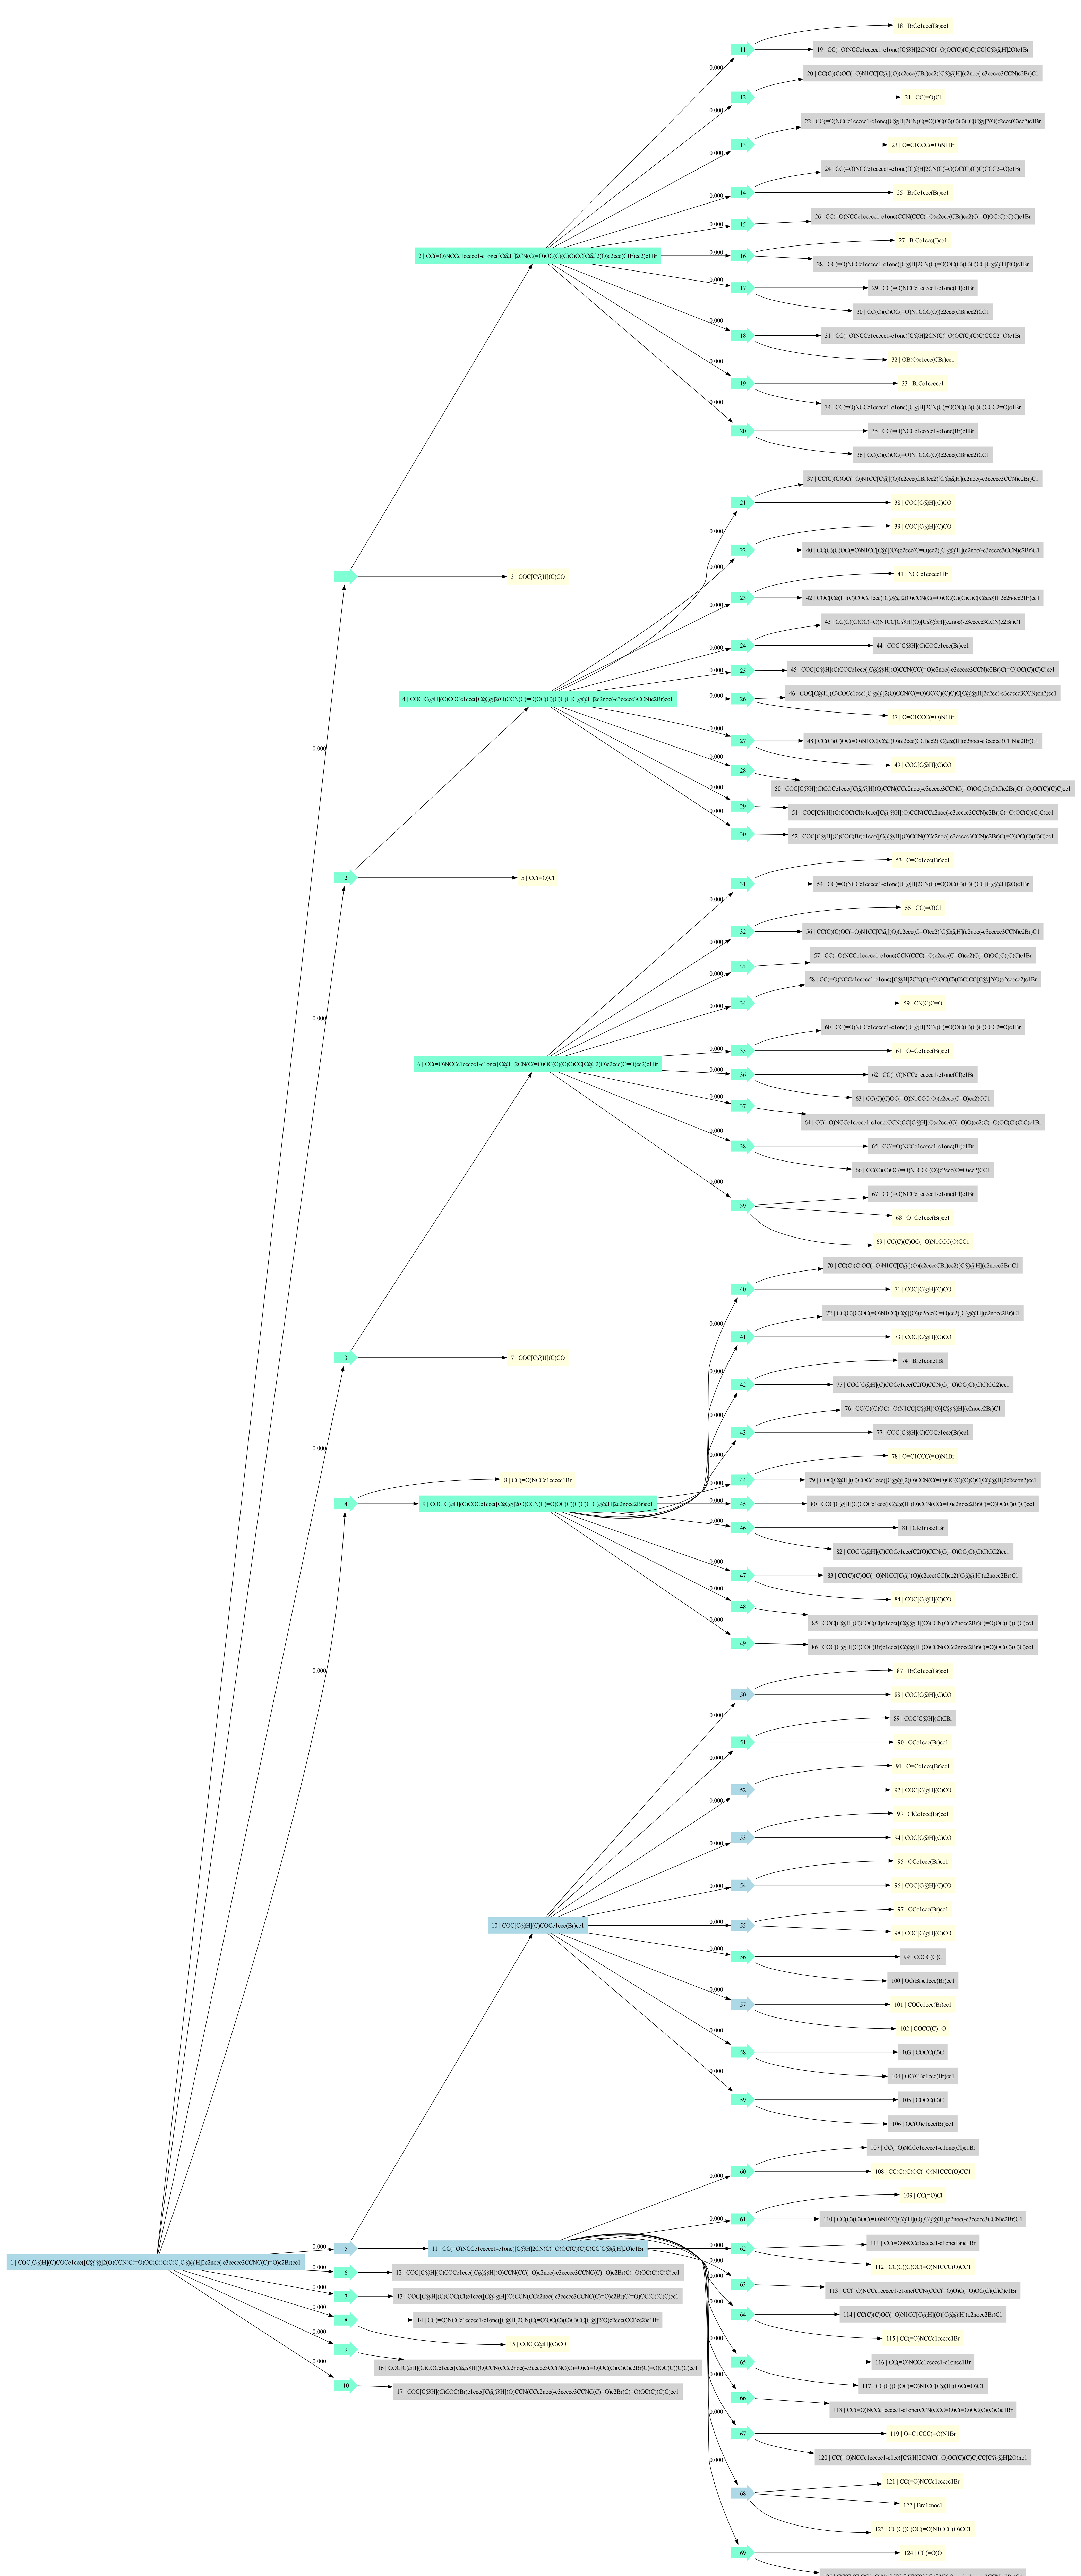

Supplement: supplementary_material [file mol_8_search_tree.pdf › materials9084/retro190_solutions/mol_8_search_tree.pdf]

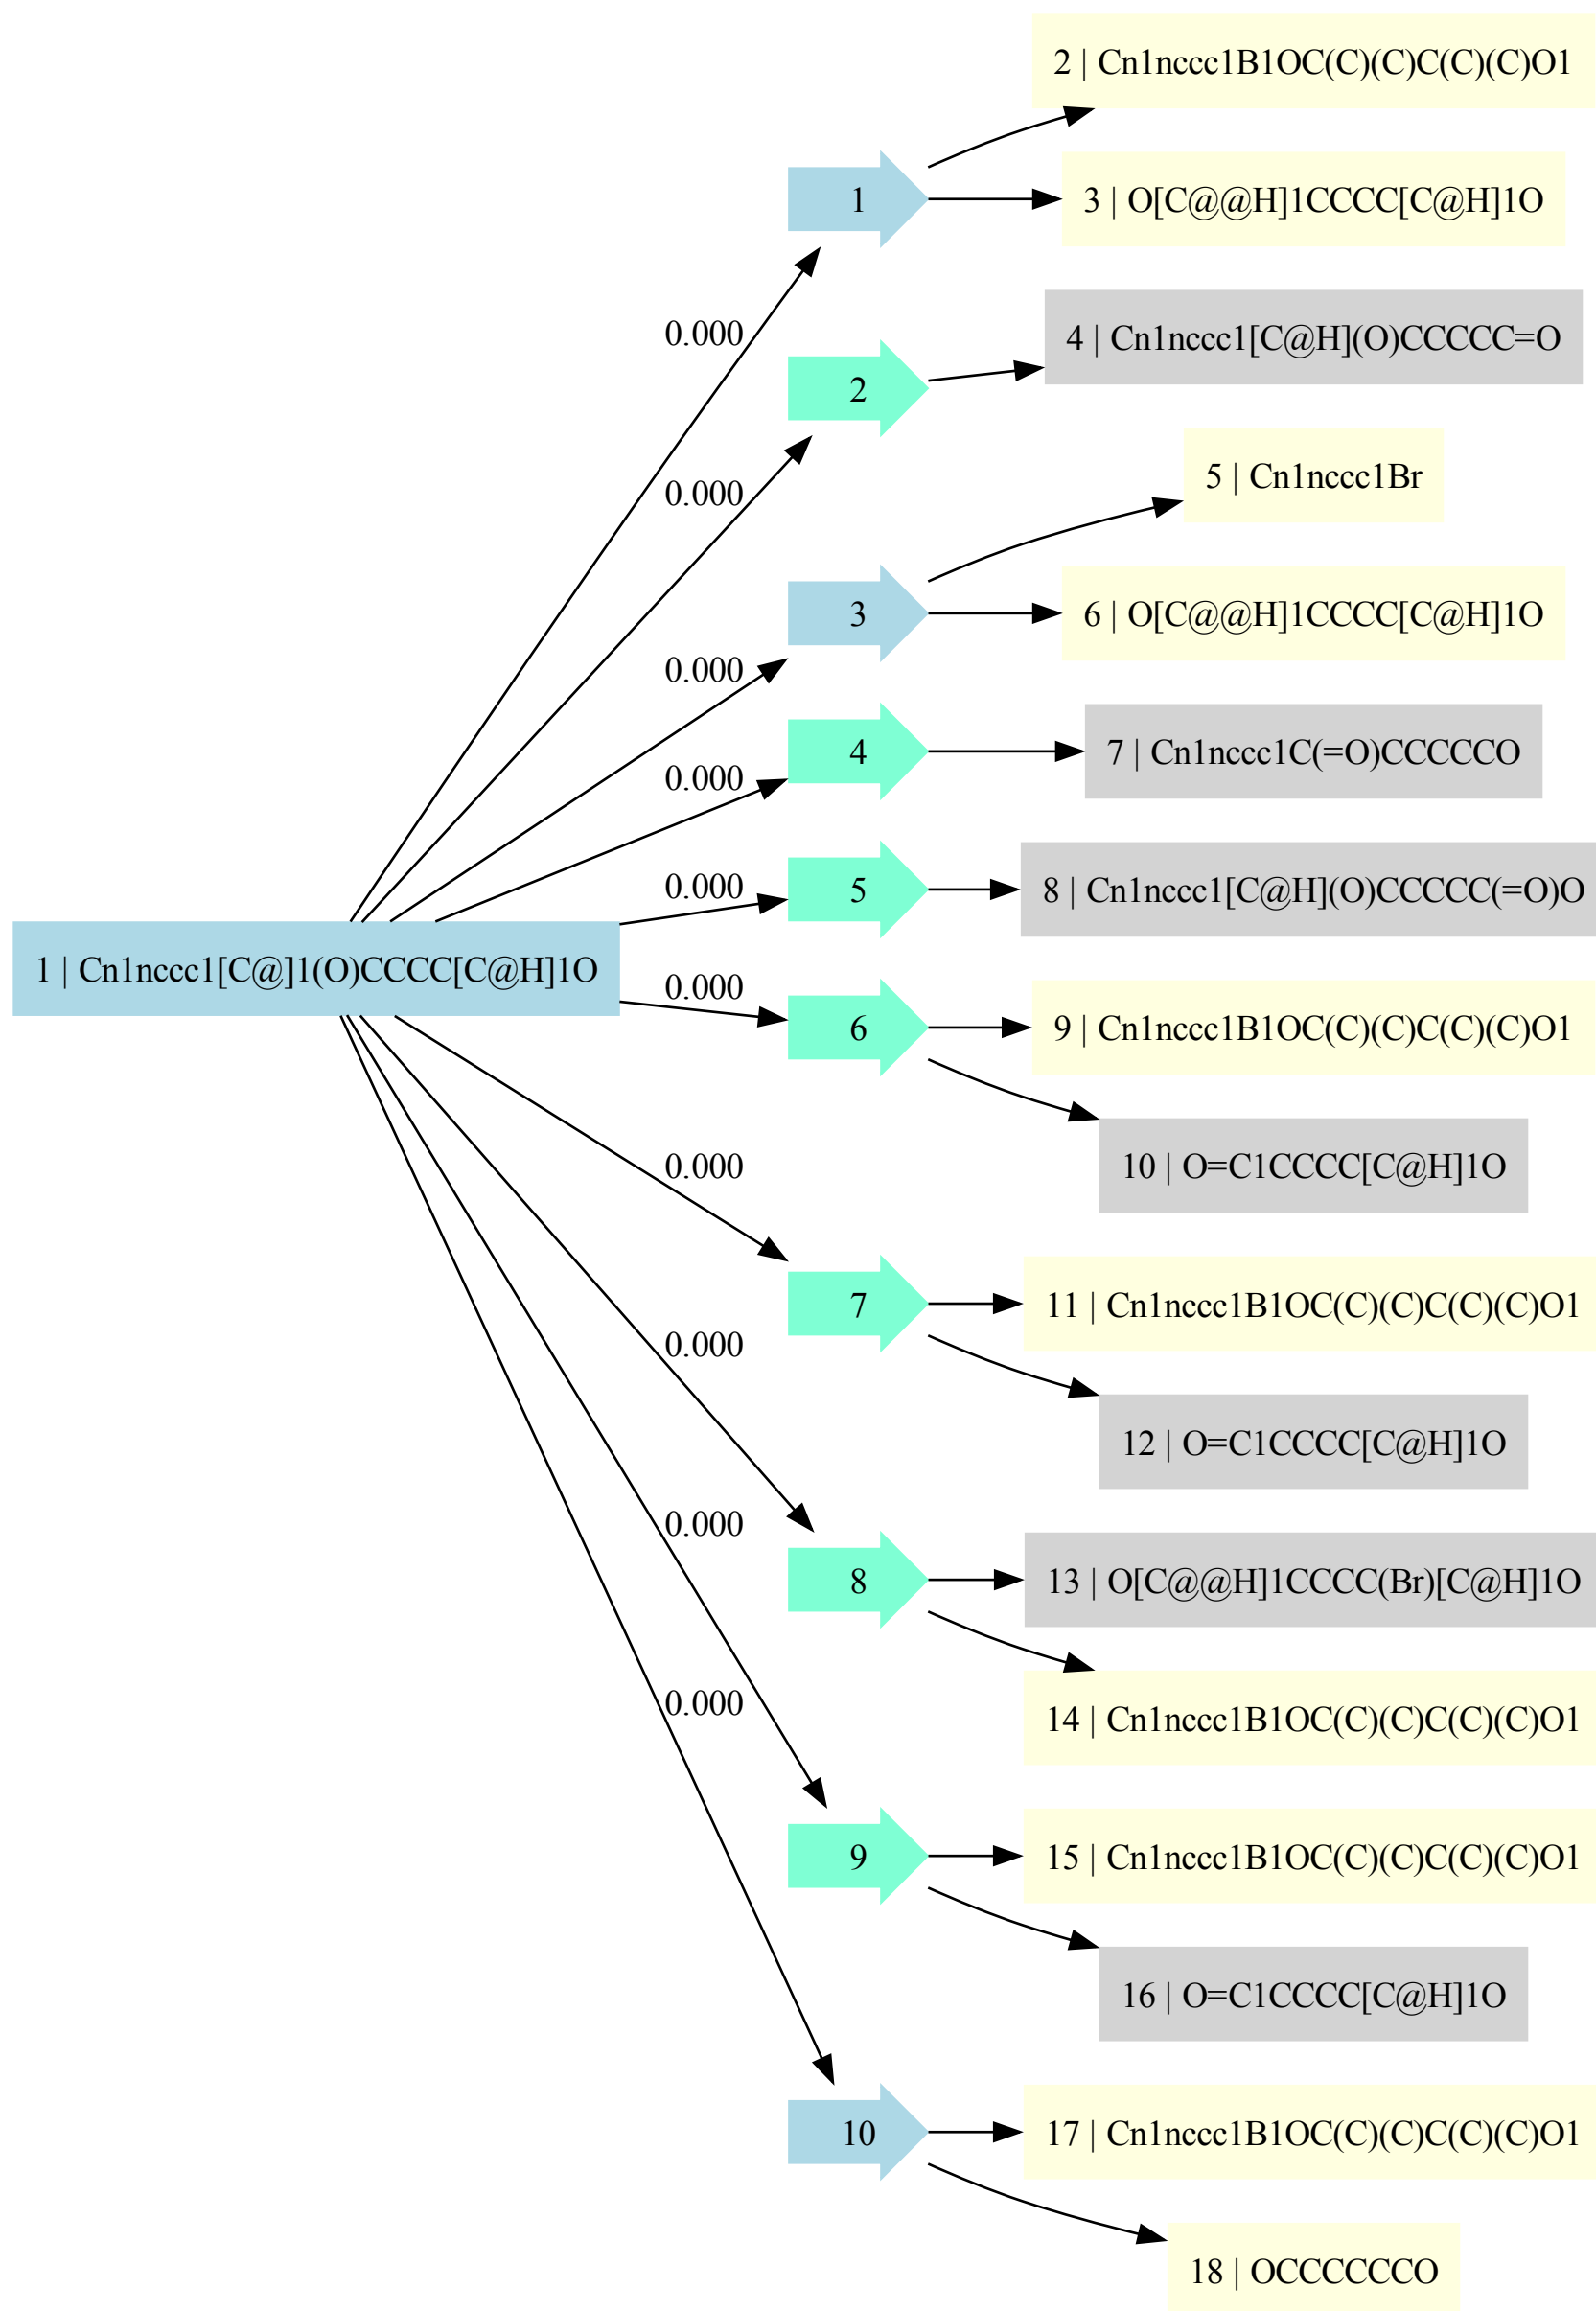

Supplement: supplementary_material [file mol_91_search_tree.pdf › materials9084/retro190_solutions/mol_91_search_tree.pdf]

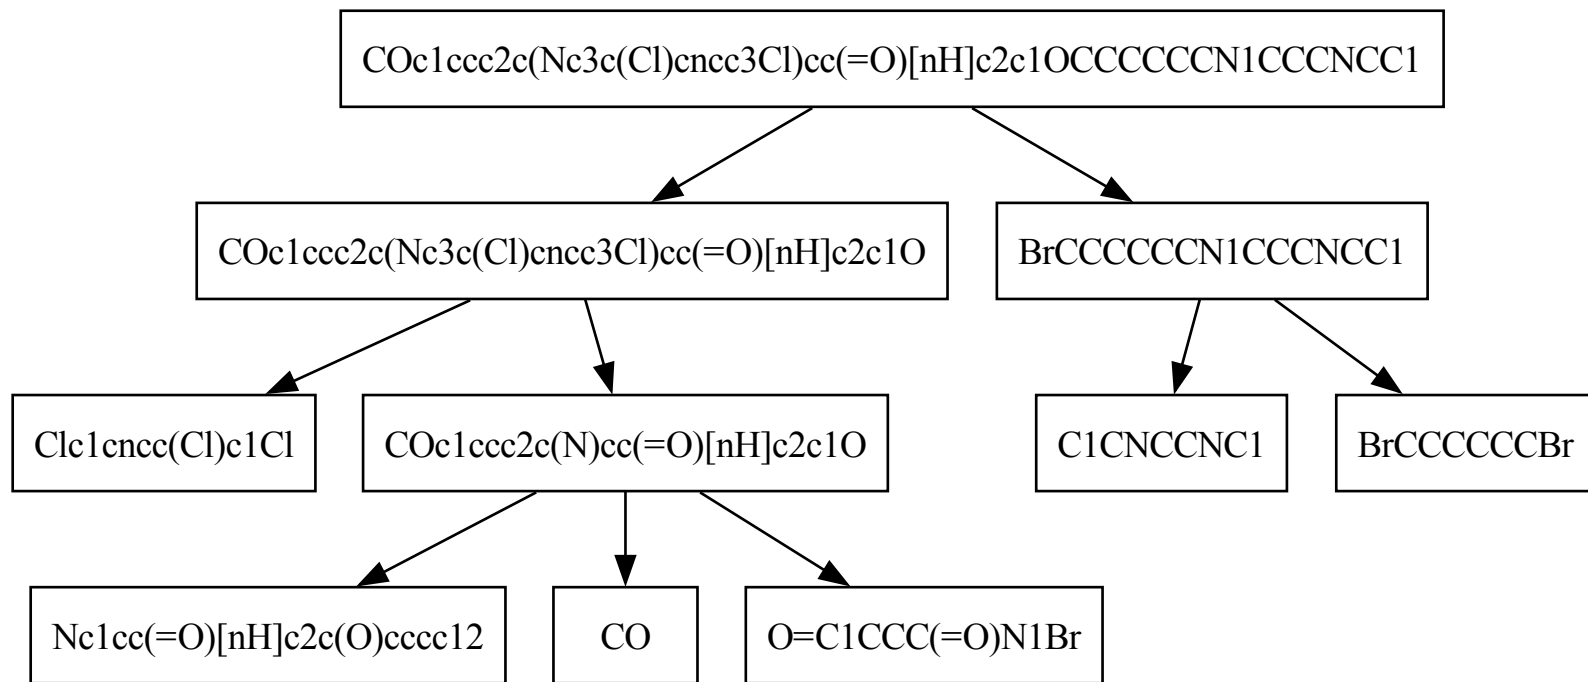

Supplement: supplementary_material [file mol_92_route_optimal.pdf › materials9084/retro190_solutions/mol_92_route_optimal.pdf]

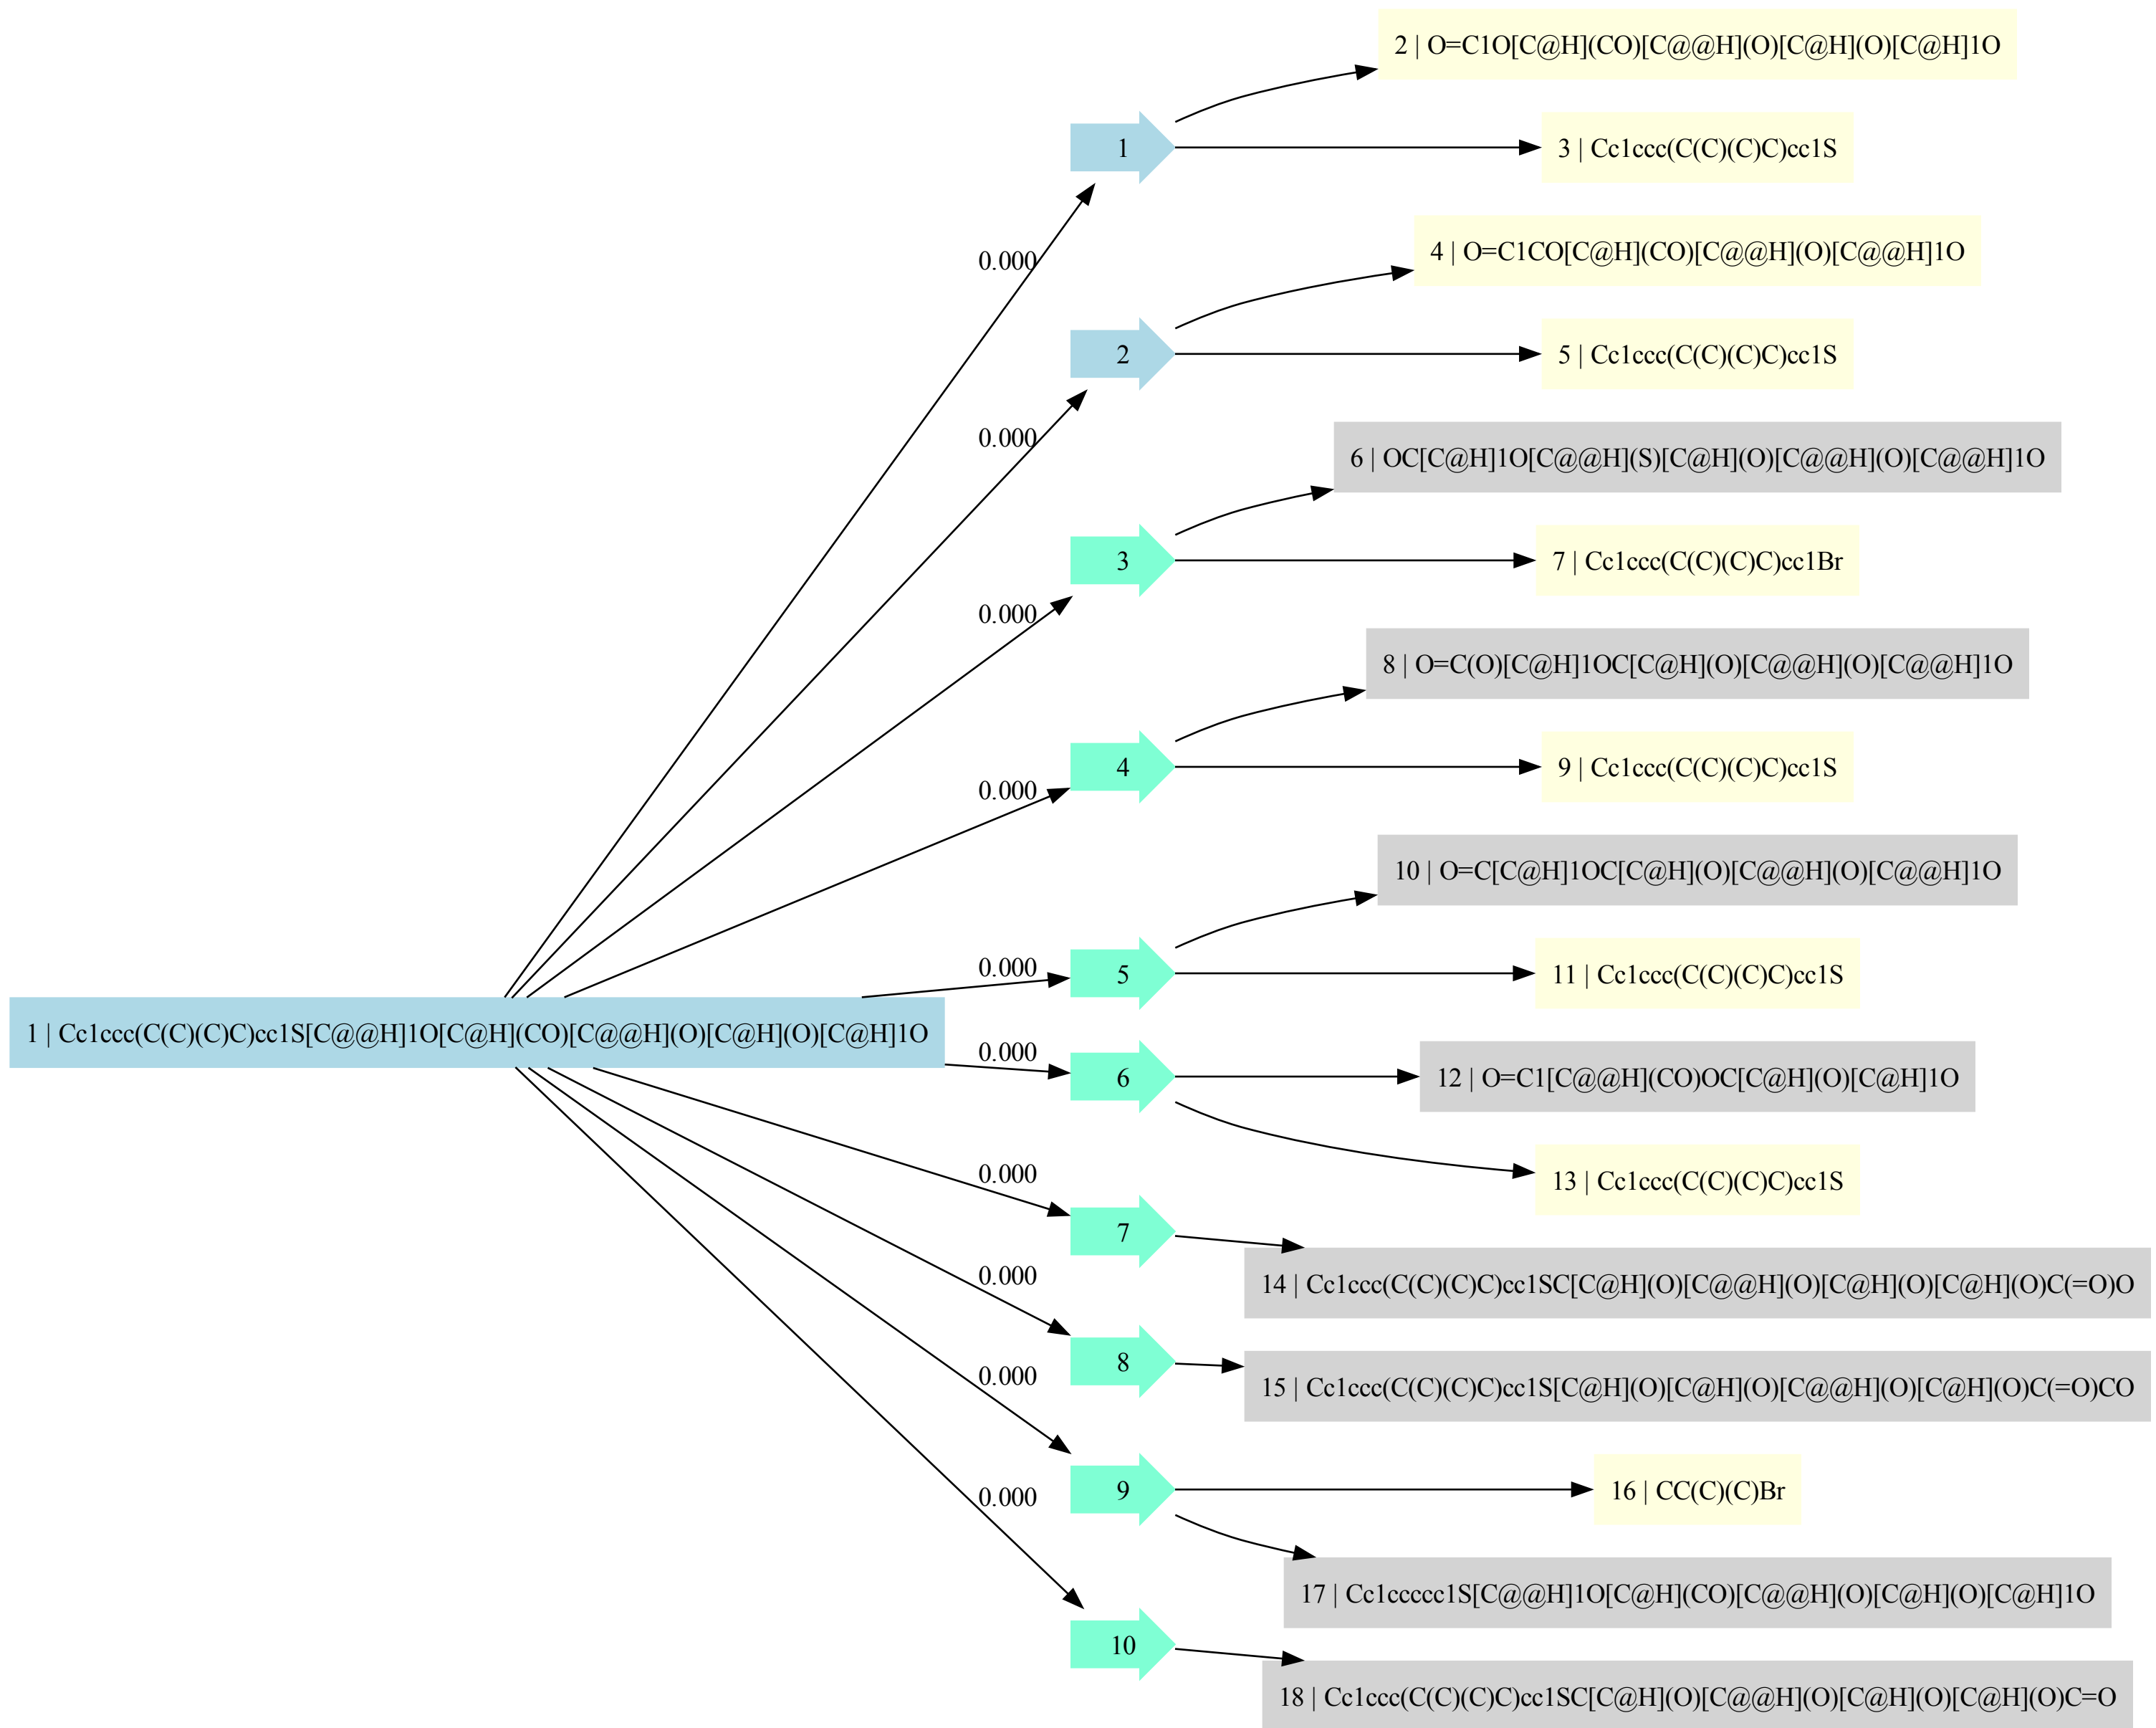

Supplement: supplementary_material [file mol_93_search_tree.pdf › materials9084/retro190_solutions/mol_93_search_tree.pdf]

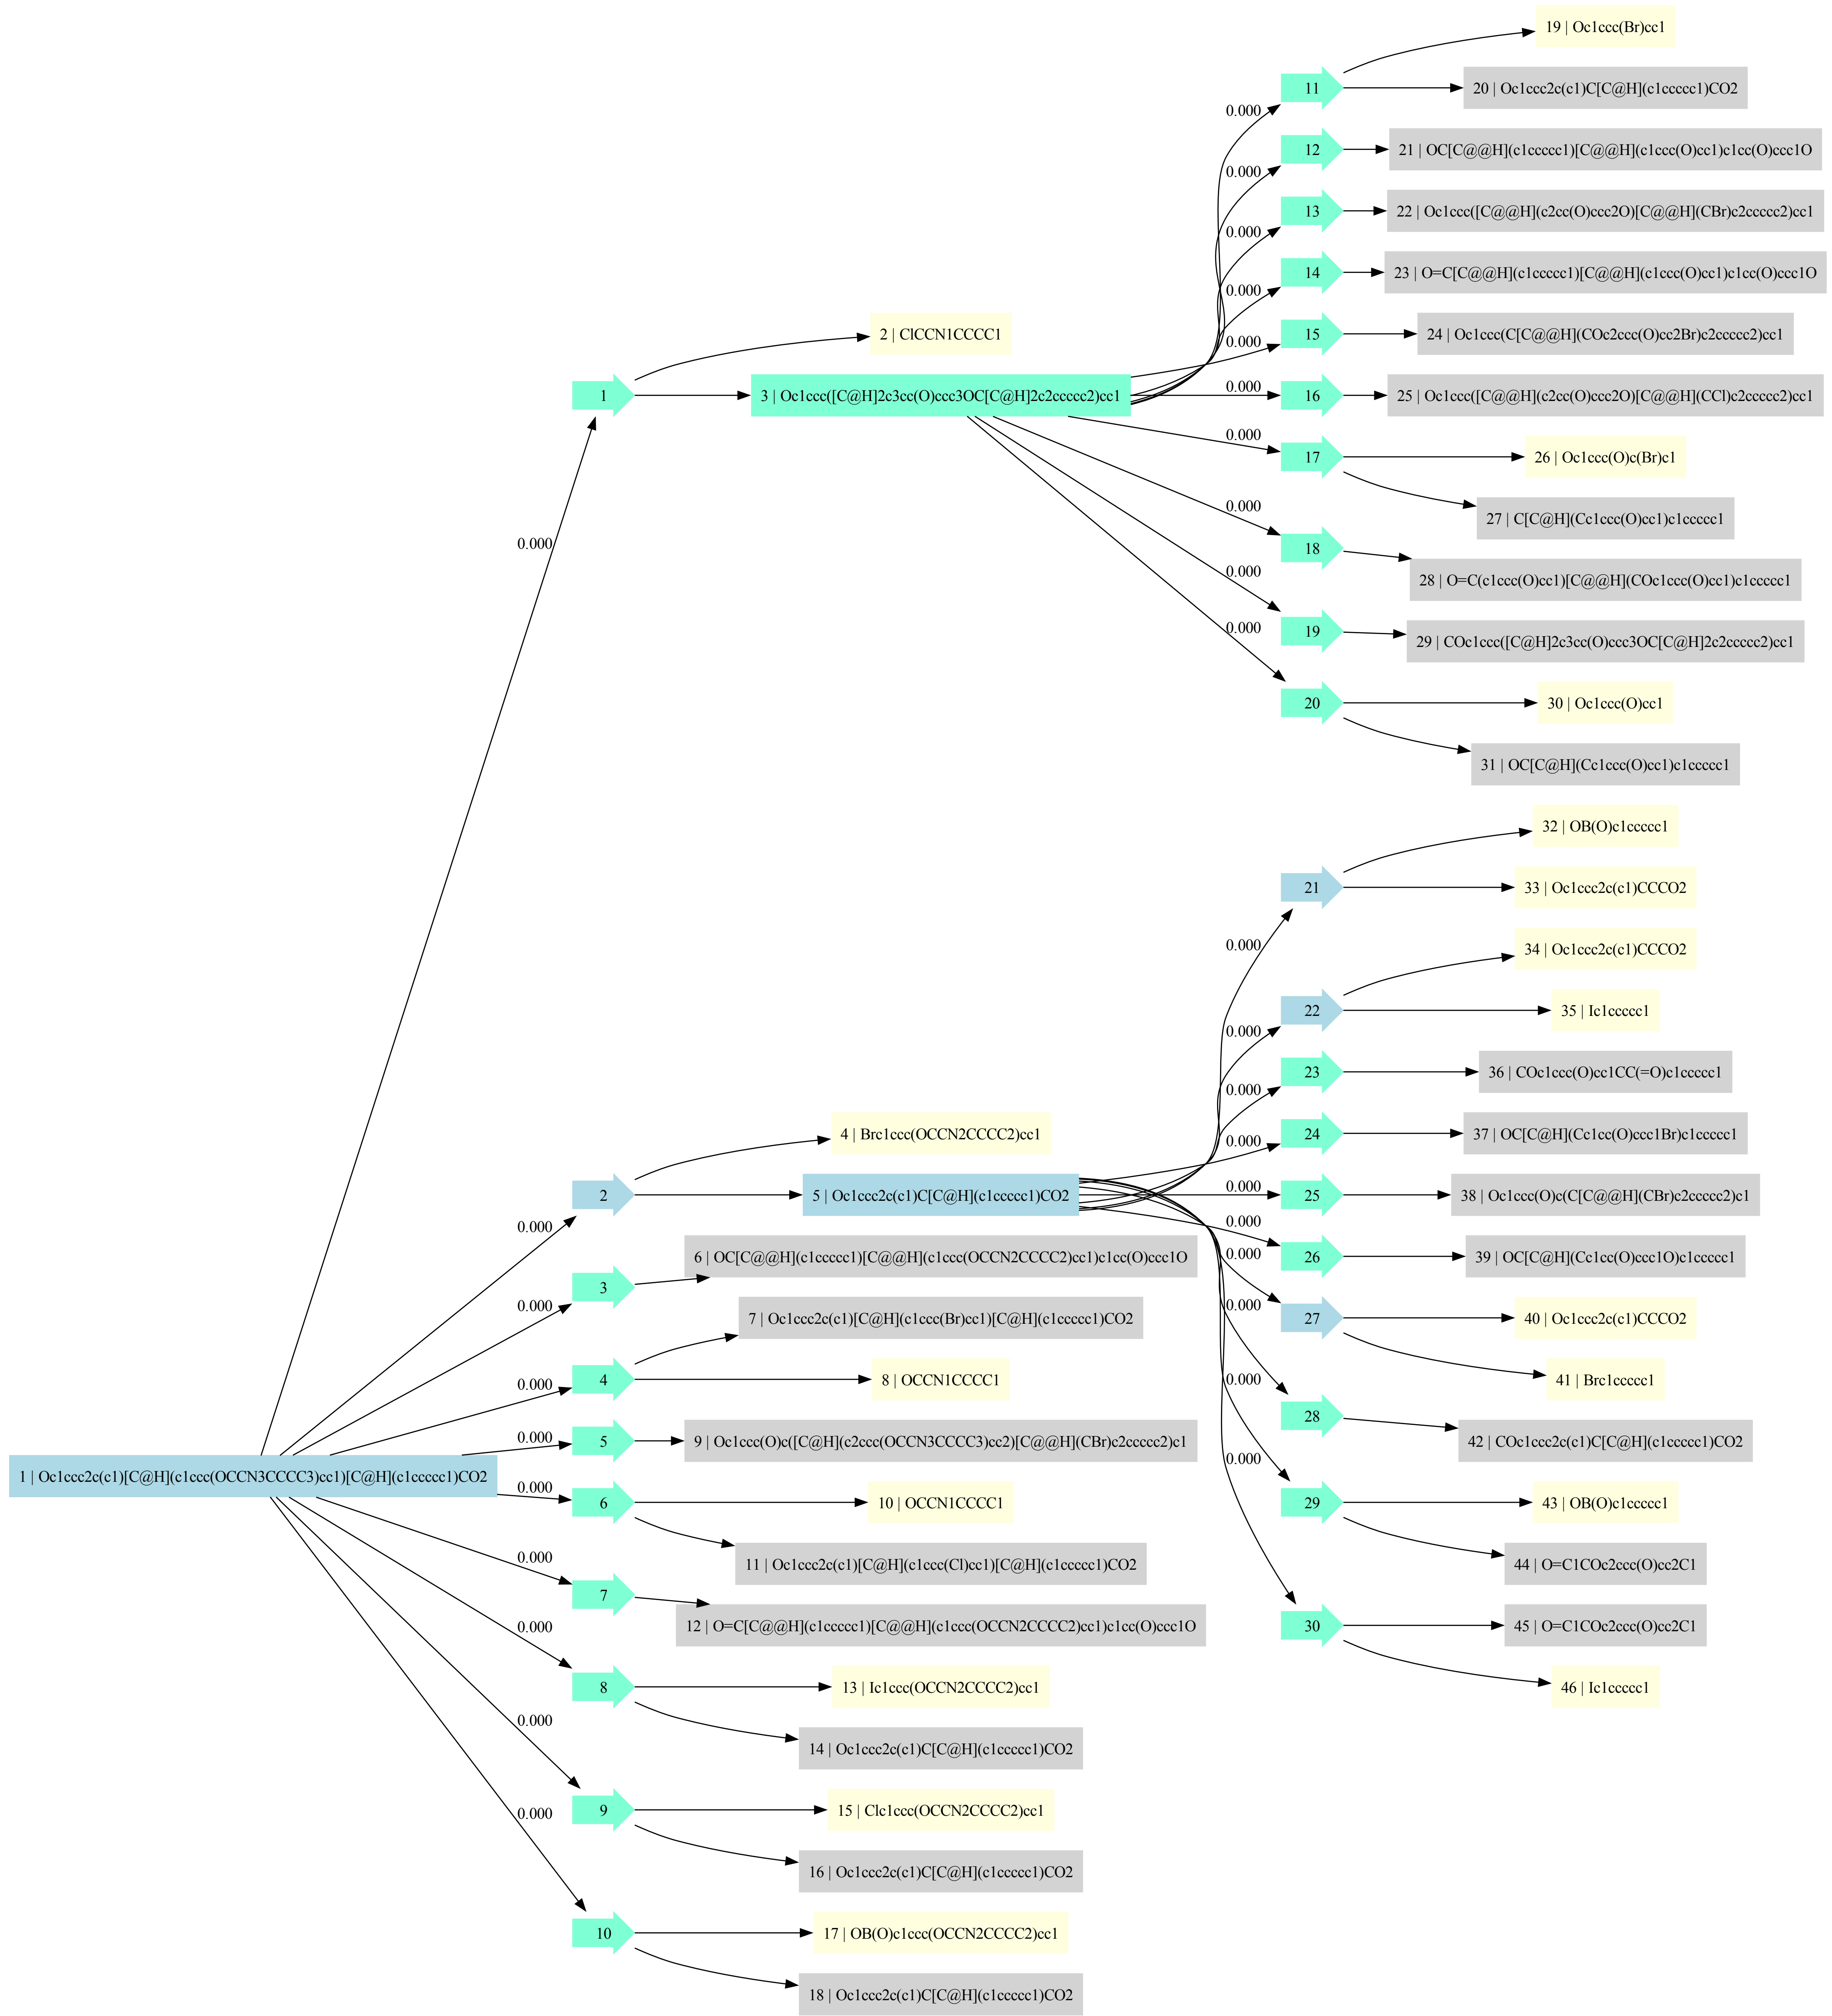

Supplement: supplementary_material [file mol_94_search_tree.pdf › materials9084/retro190_solutions/mol_94_search_tree.pdf]

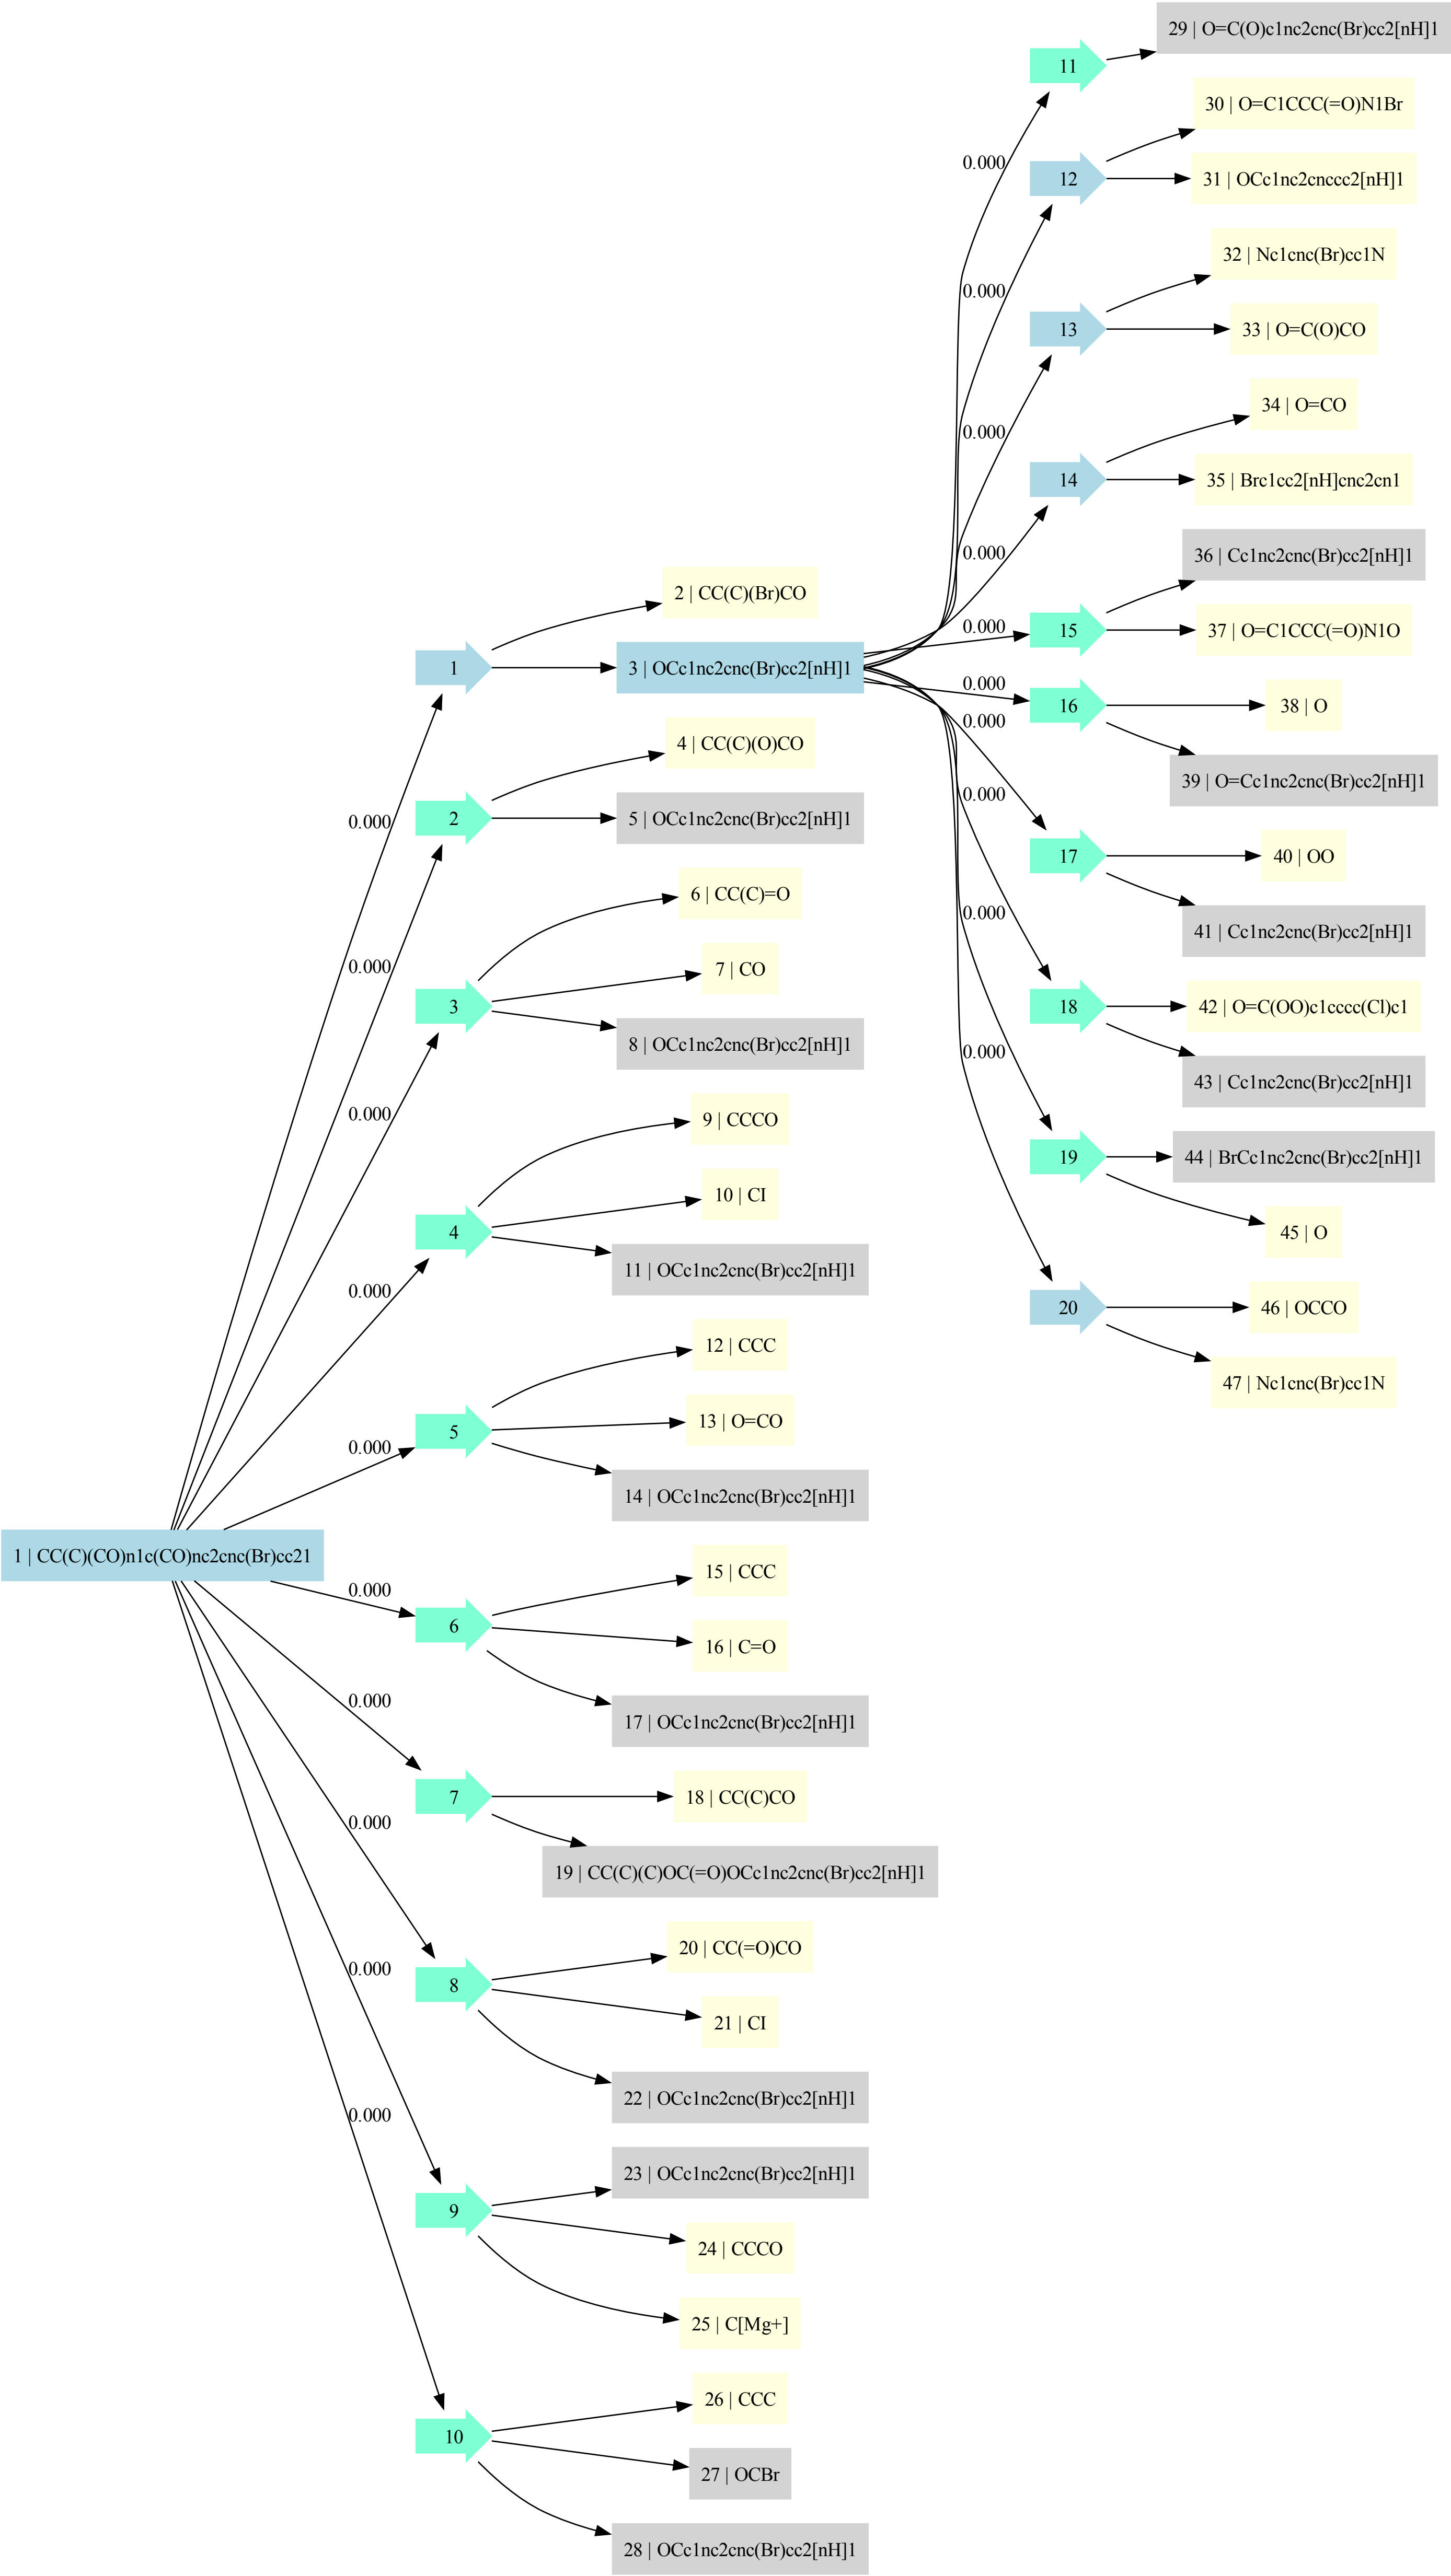

Supplement: supplementary_material [file mol_95_search_tree.pdf › materials9084/retro190_solutions/mol_95_search_tree.pdf]

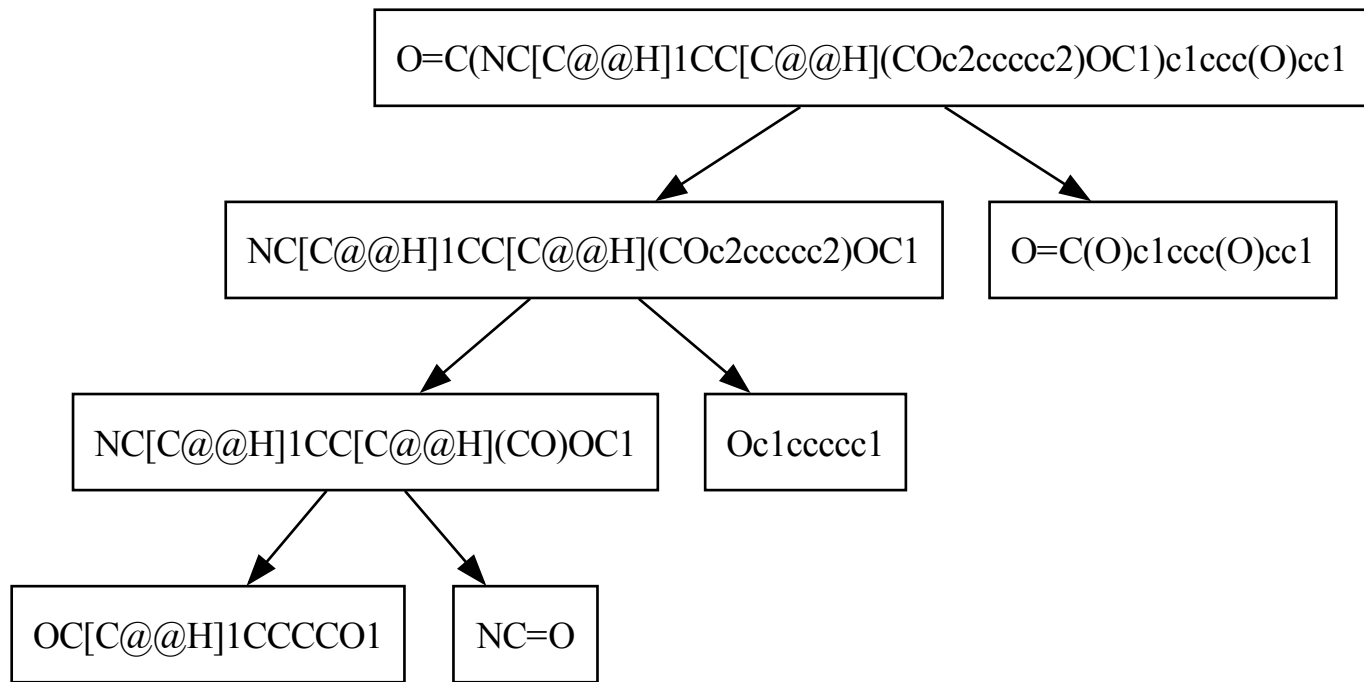

Supplement: supplementary_material [file mol_96_route_optimal.pdf › materials9084/retro190_solutions/mol_96_route_optimal.pdf]

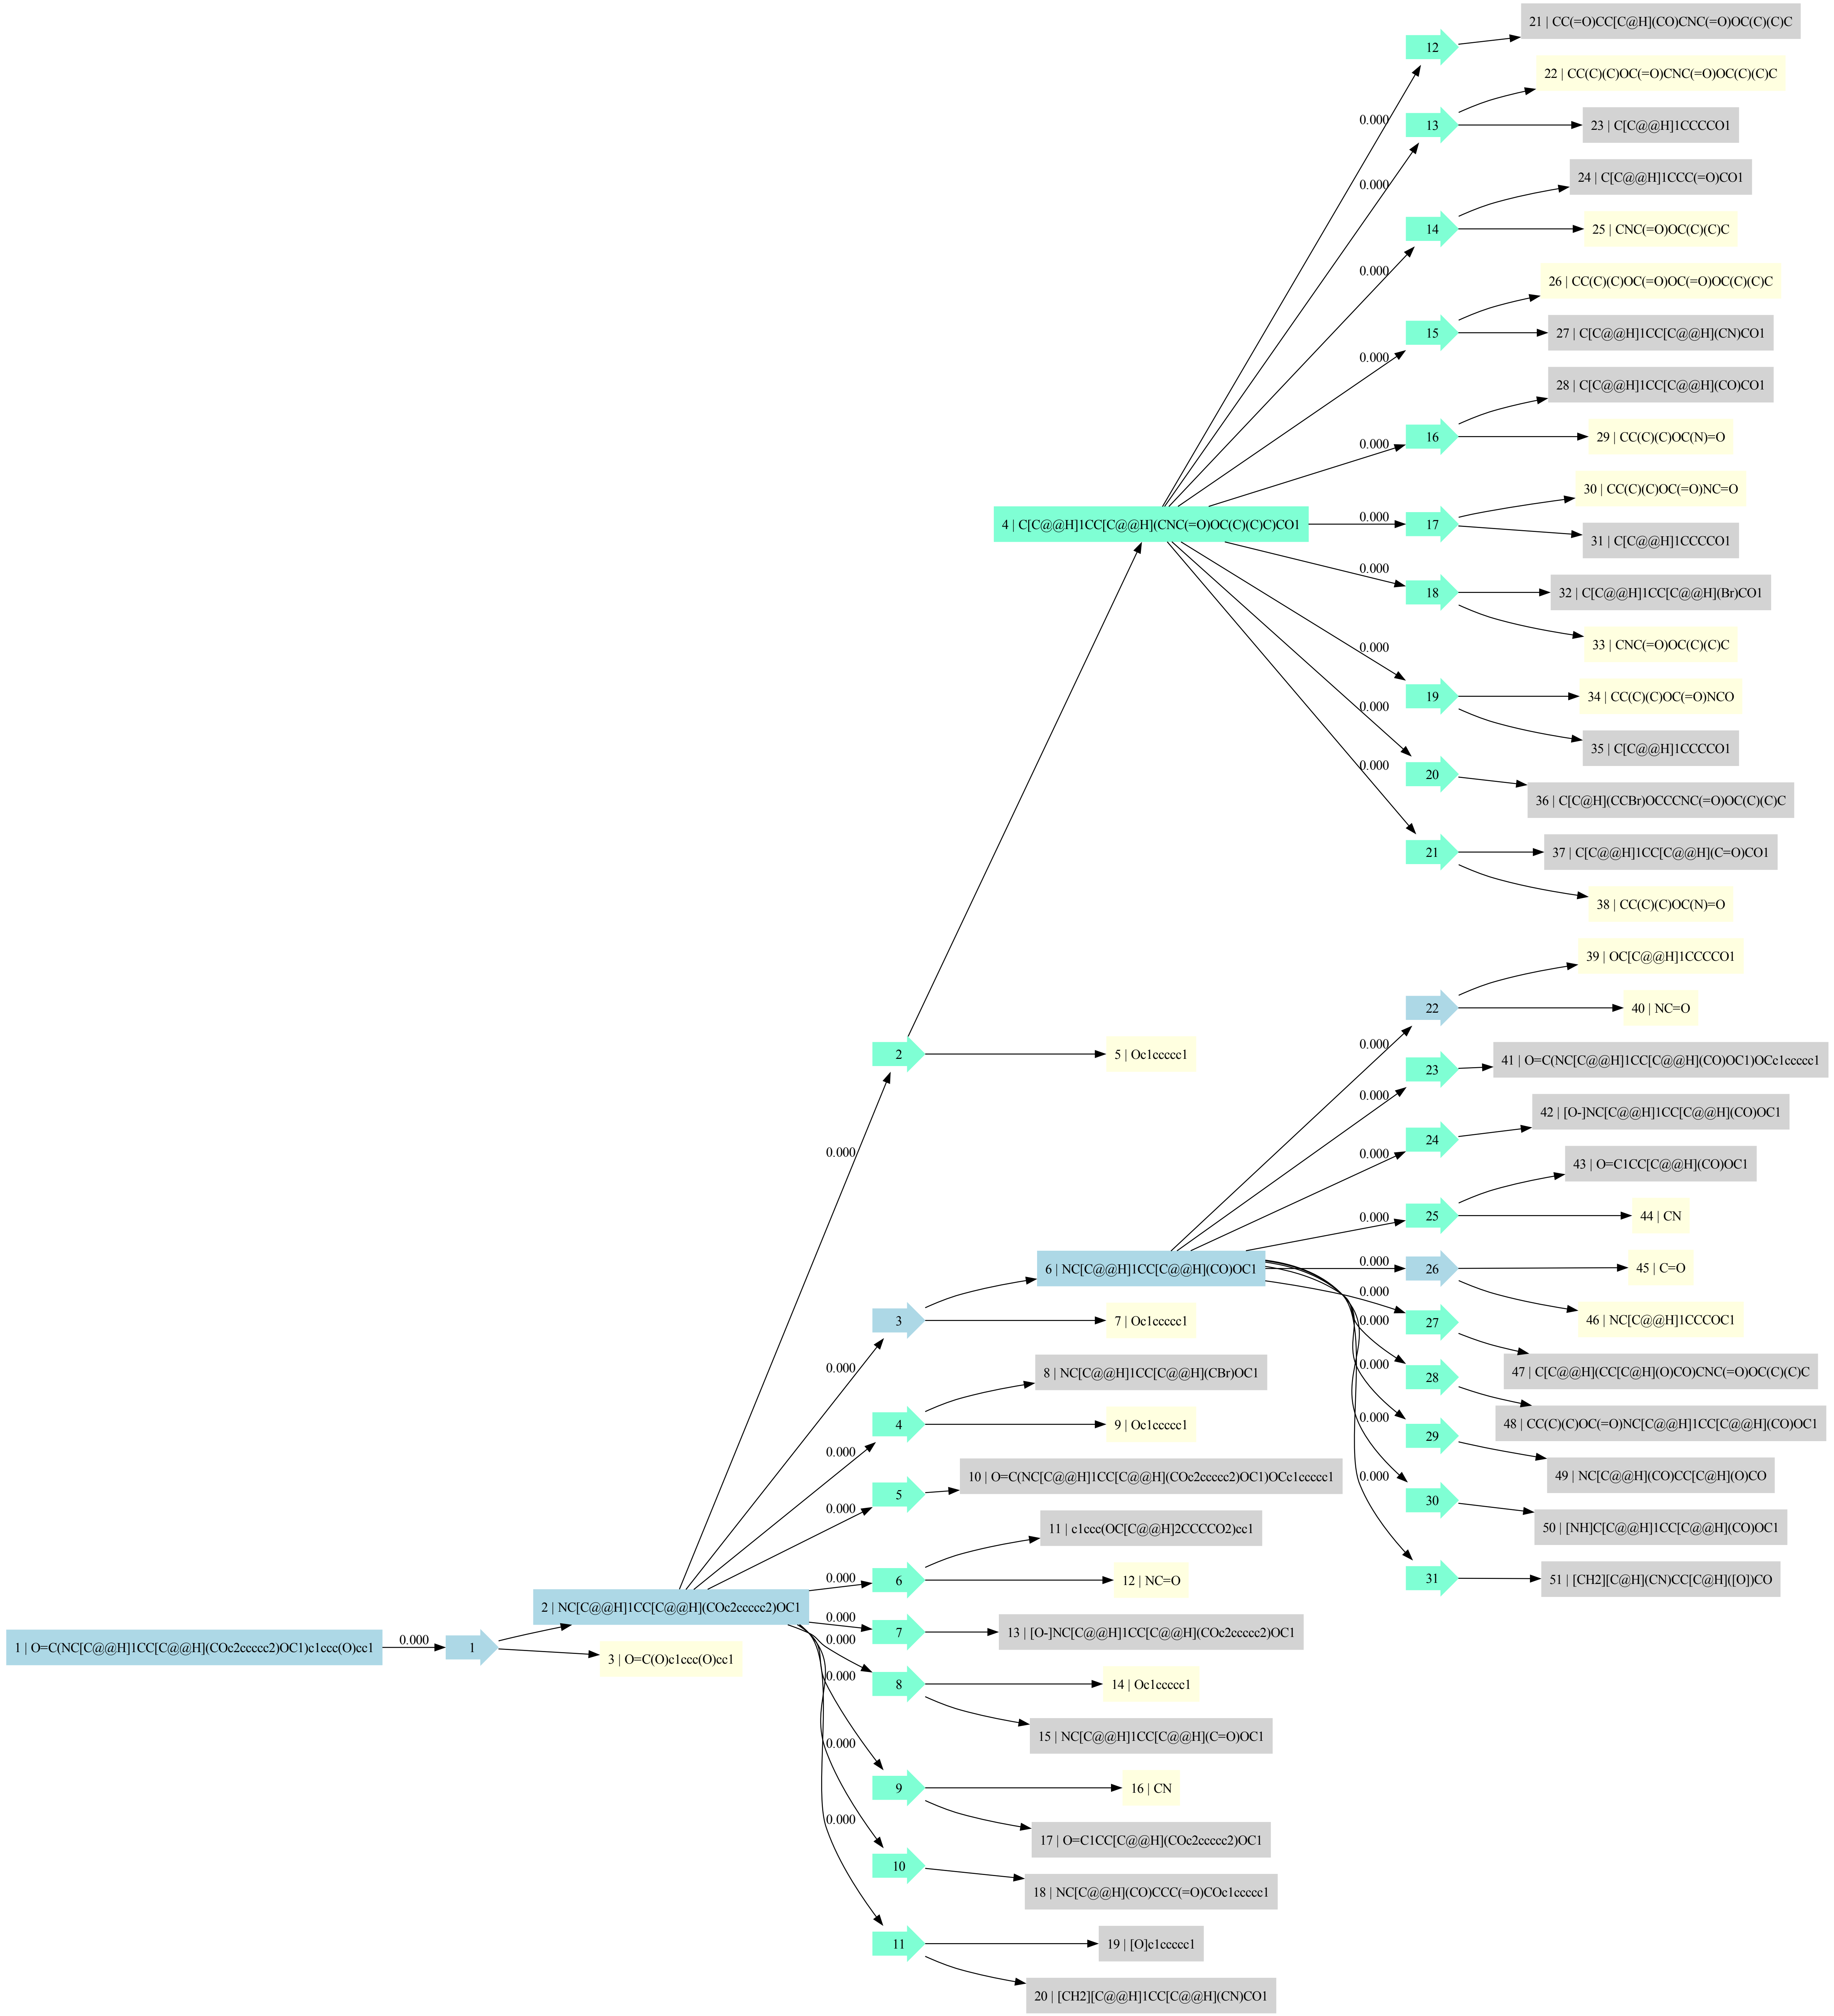

Supplement: supplementary_material [file mol_96_search_tree.pdf › materials9084/retro190_solutions/mol_96_search_tree.pdf]

C[C@@H]1CNC(=O)c2cc3cc(OCCCN4CCCCC4)ccc3n21



ClCCCN1CCCCC1

C[C@@H]1CNC(=O)c2cc3cc(O)ccc3n21

O=C(O)c1cc2cc(O)ccc2[nH]1

CCCN

Supplement: supplementary_material [file mol_97_route_optimal.pdf › materials9084/retro190_solutions/mol_97_route_optimal.pdf]

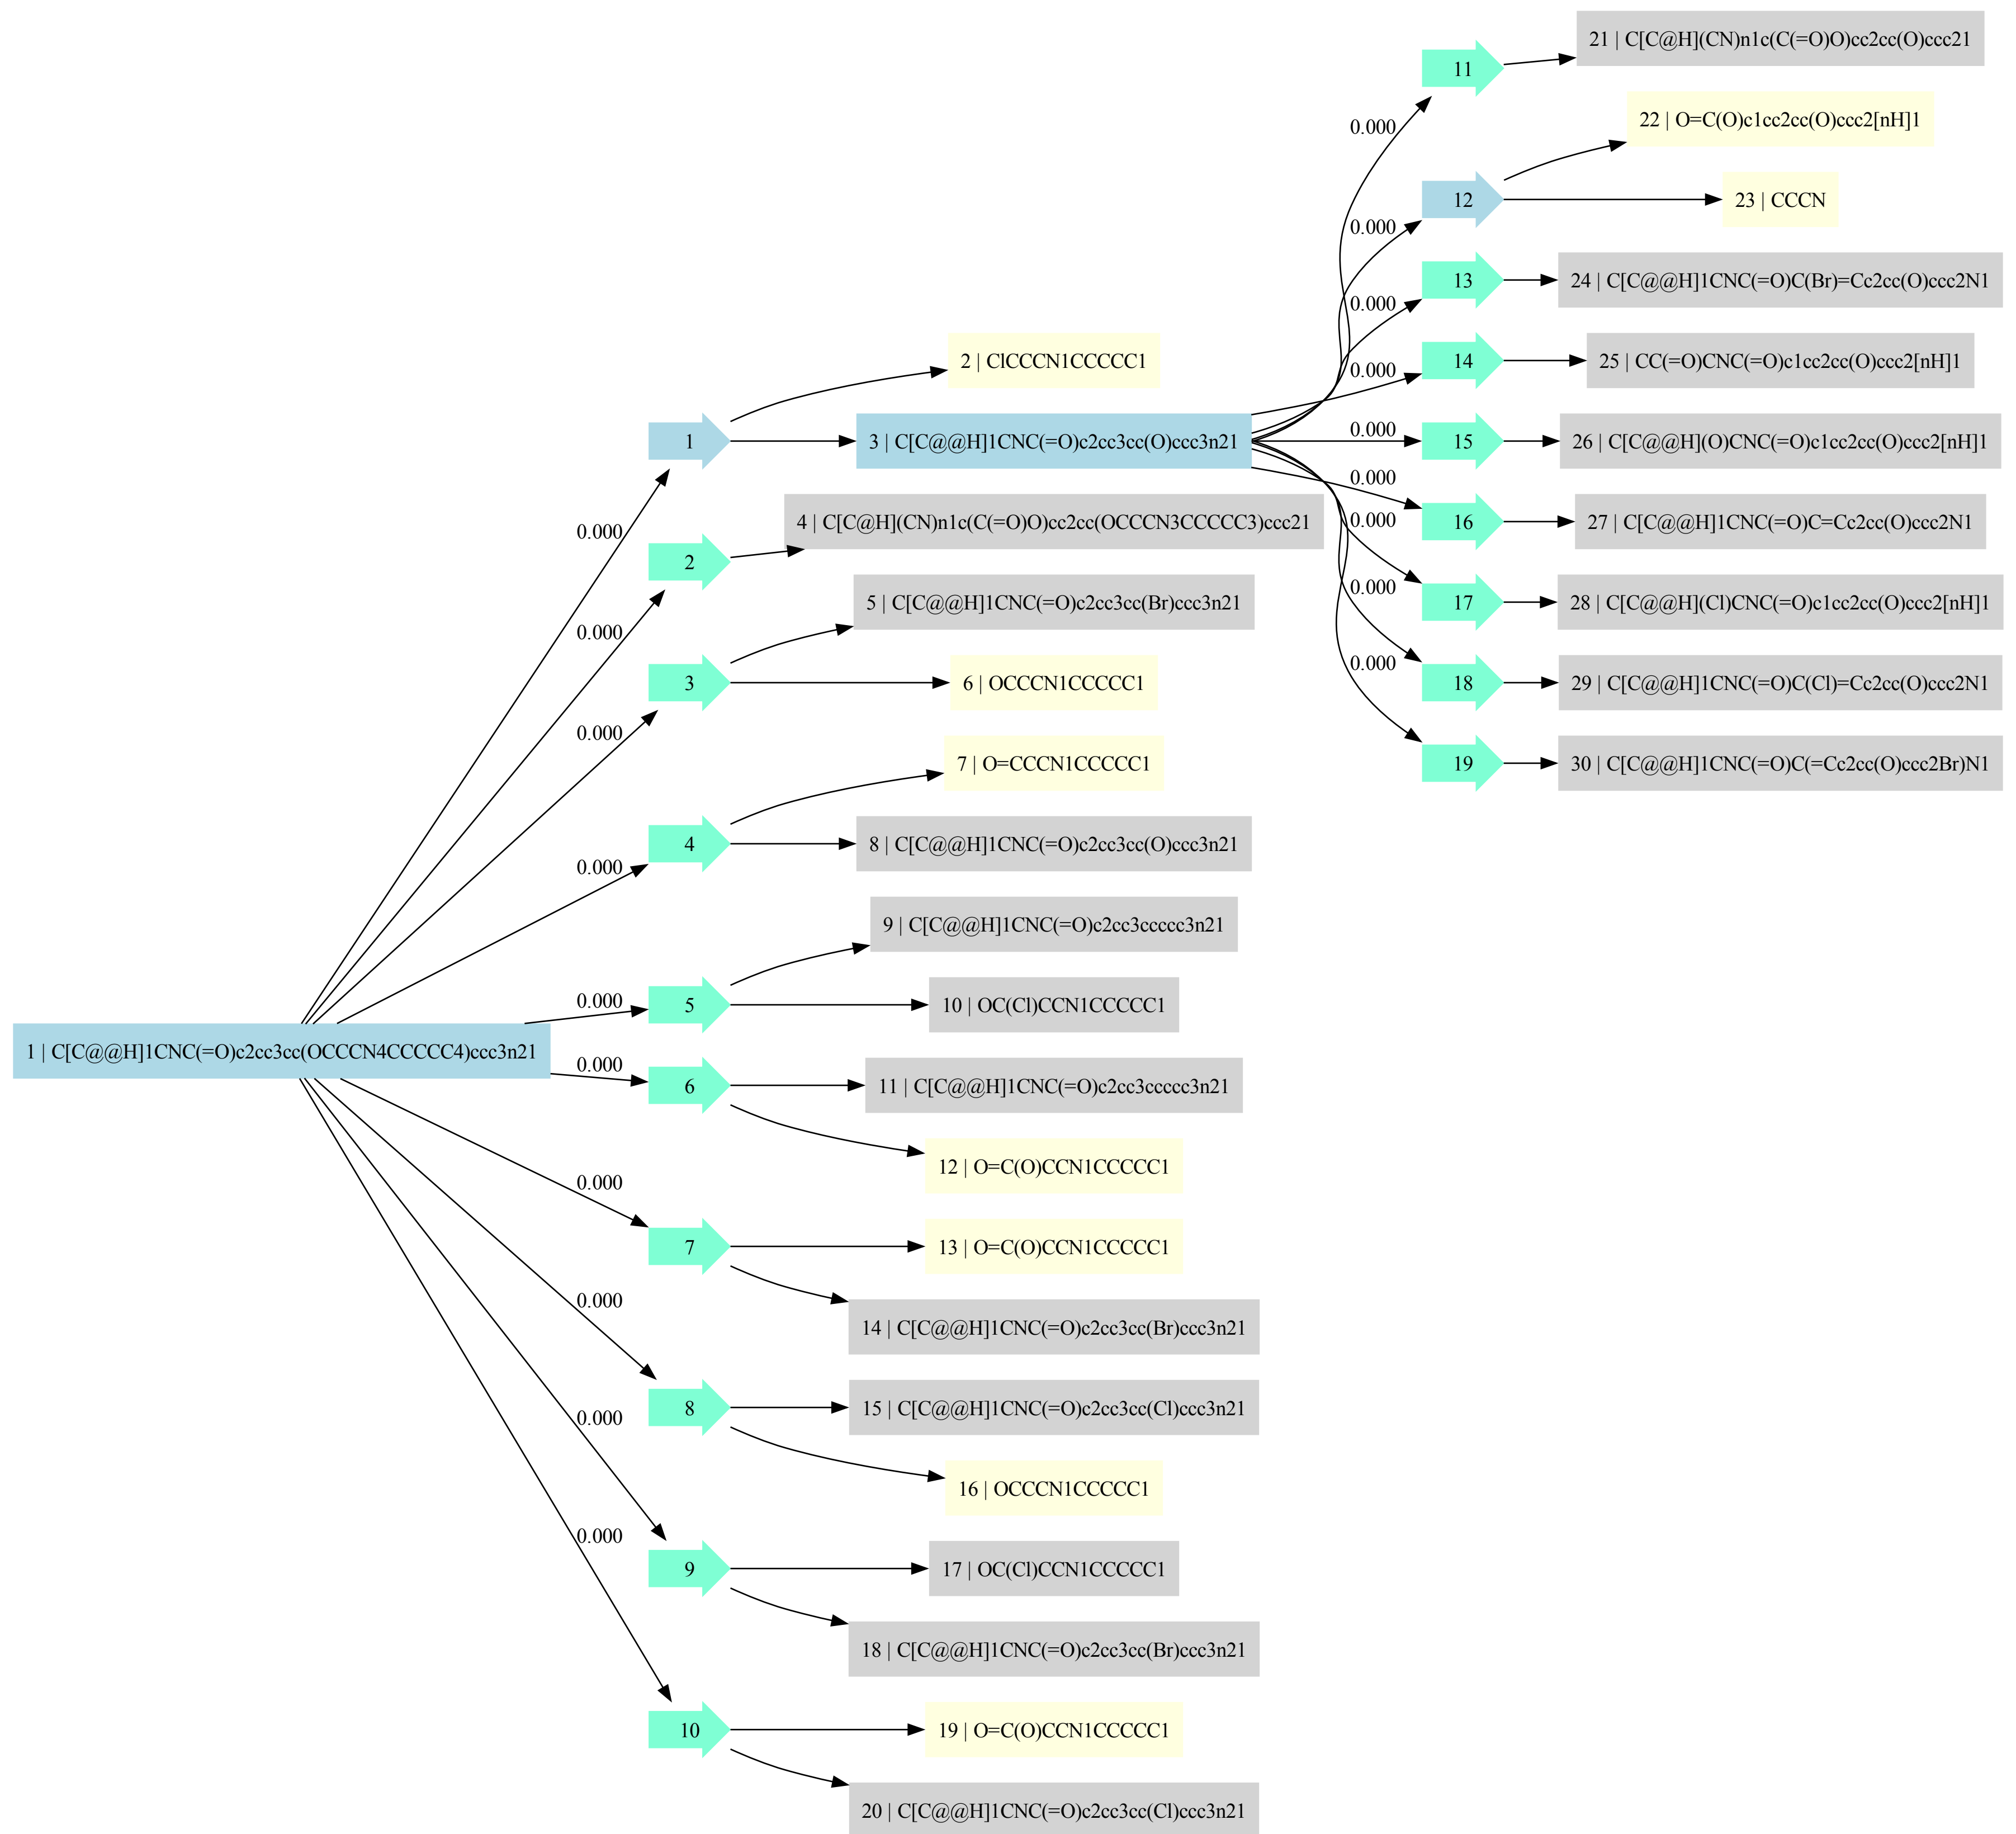

Supplement: supplementary_material [file mol_97_search_tree.pdf › materials9084/retro190_solutions/mol_97_search_tree.pdf]

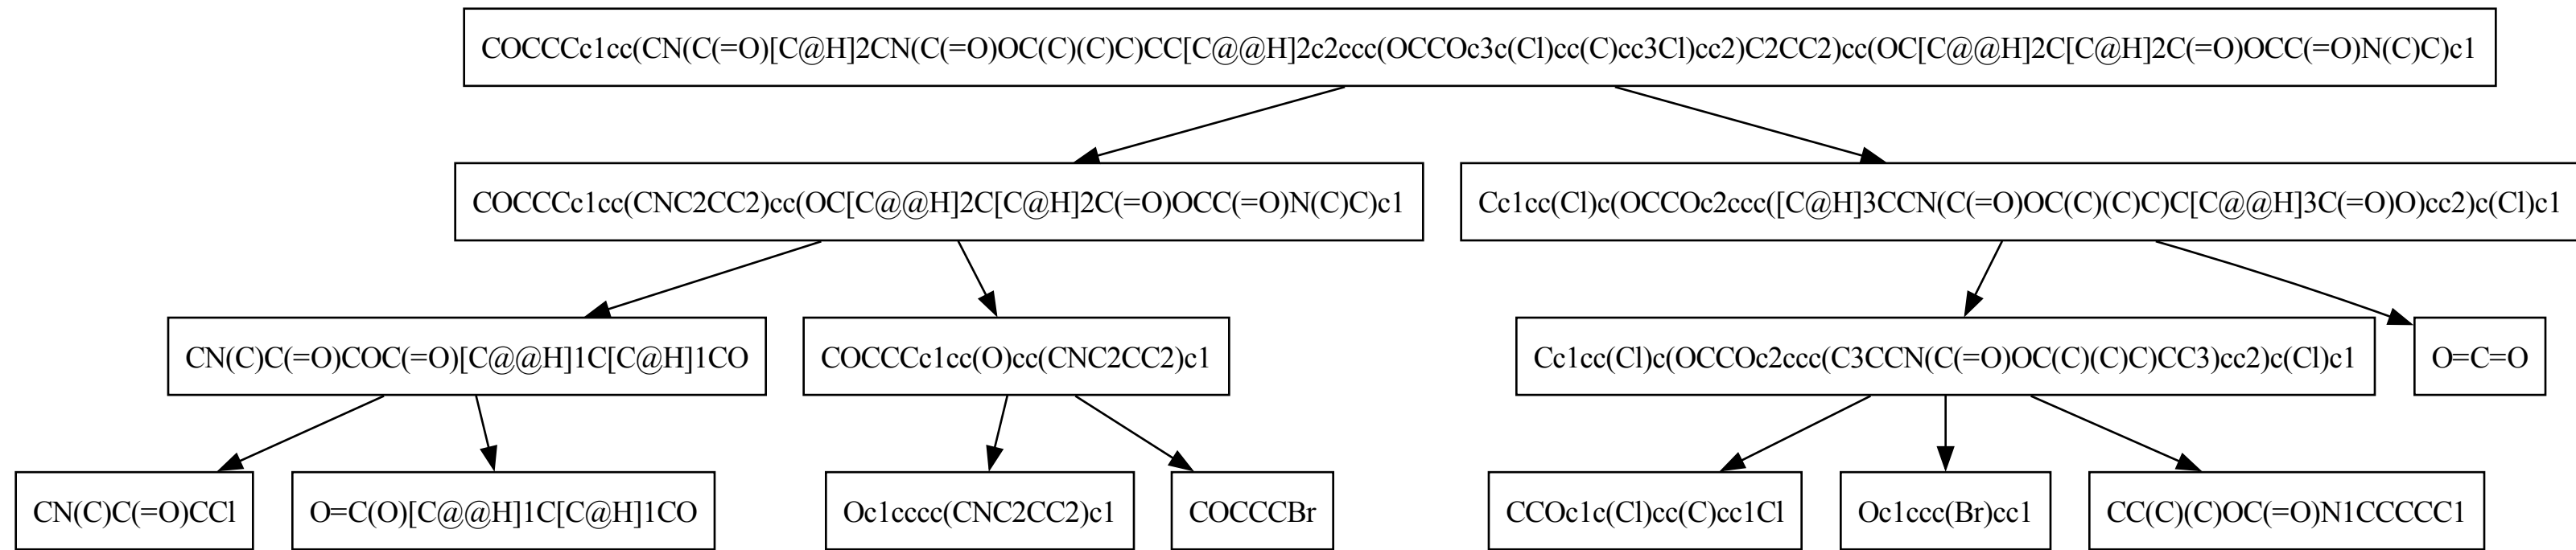

Supplement: supplementary_material [file mol_98_route_optimal.pdf › materials9084/retro190_solutions/mol_98_route_optimal.pdf]
